# Supplementary material
Source: PubMed Central journal article supplement (PMC3982501)
Supplement: mt20143x3.pdf [file mt20143x3.pdf]

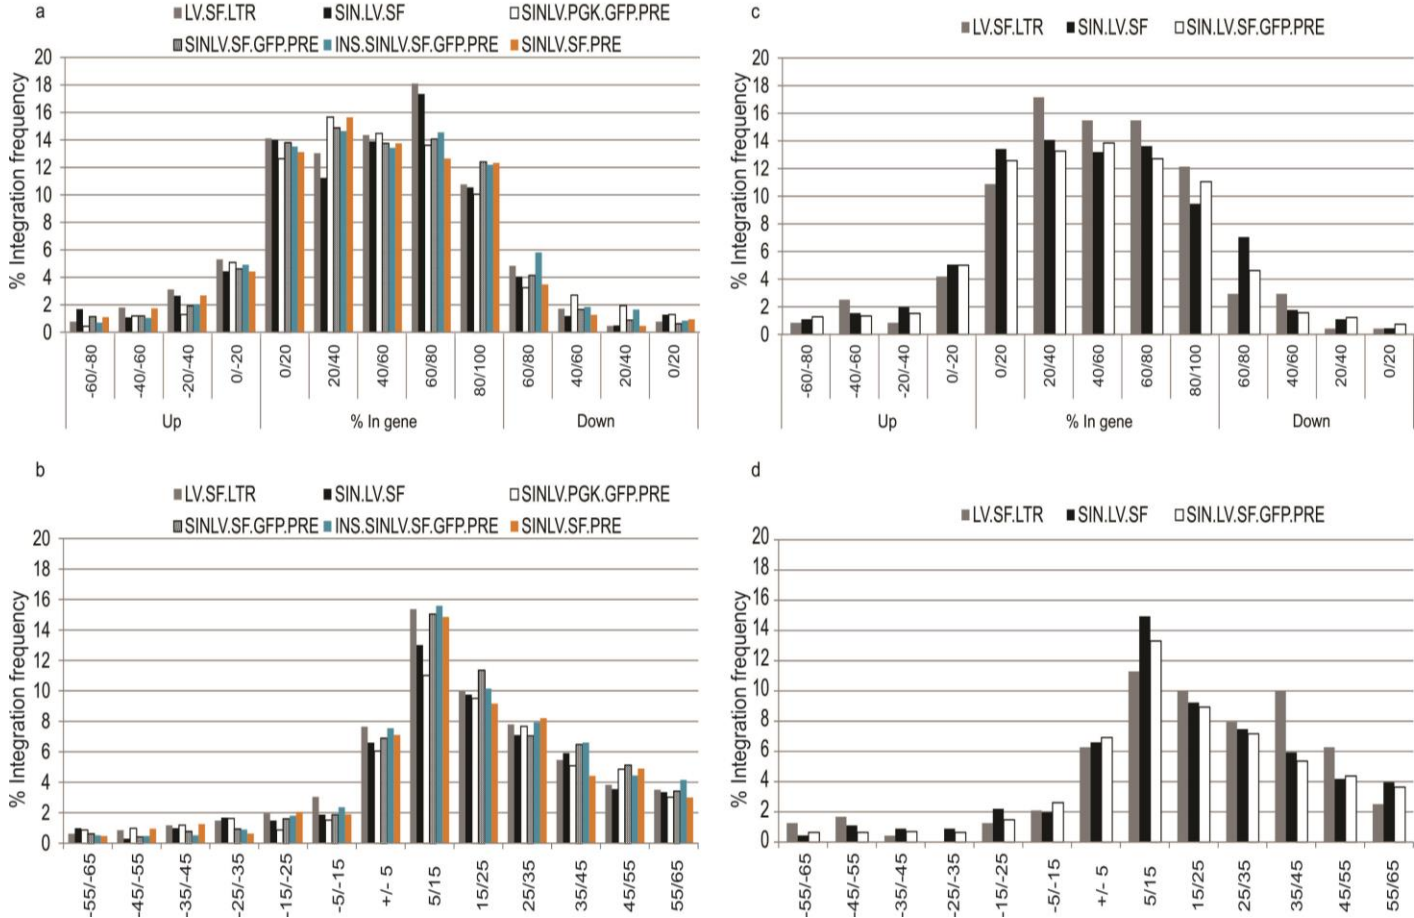

**Supplementary Figure 3. Vector integration site analysis in tumor infiltrating liver.** a,c) Integration frequency distribution along the transcription unit of the indicated vector in *Cdkn2a*<sup>-/-</sup> a) and *Cdkn2a*<sup>+/-</sup> c). The length of each gene was normalized to 1 and divided in 5 intervals (each 20% of the gene size). Integrations upstream and downstream of genes are shown in 20-kb intervals. b,d) Integration frequency distribution around the TSS of the indicated vector in *Cdkn2a*<sup>-/-</sup> b) and *Cdkn2a*<sup>+/-</sup> d). A 60-kb window centered on the TSS divided in 10-kb intervals is shown.
