# Supplementary material
Source: PubMed Central journal article supplement (PMC3982501)
Supplement: mt20143x5.pdf [file mt20143x5.pdf]

## Cohort1

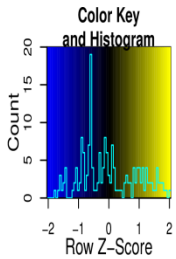

## Cohort2

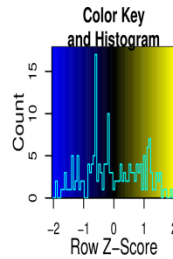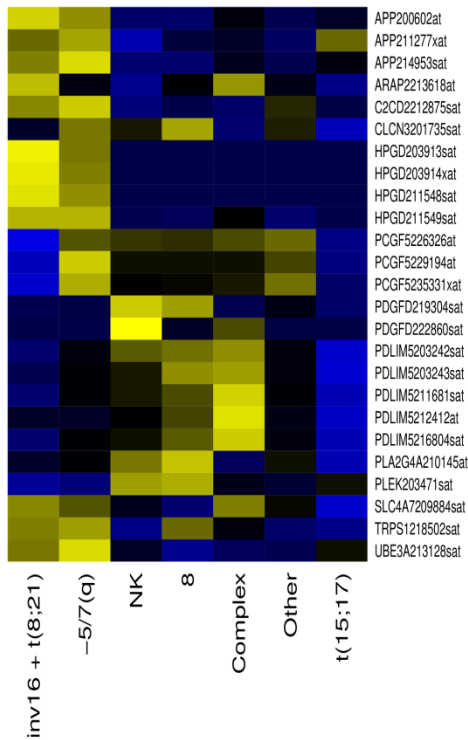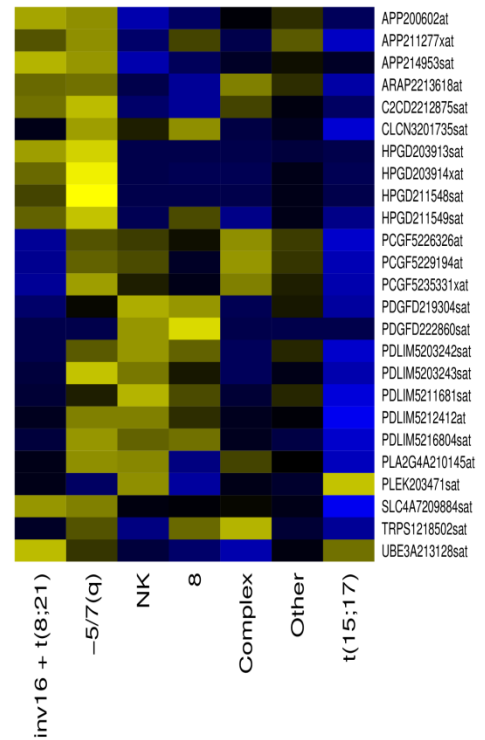

**Heat map of CIS gene deregulated in AML.** To visualize the results of ANOVA analysis, a heat map of gene expression was finally produced. Each colored cell in the heat map represented the median gene expression value for a certain group in the data set.
