# Supplementary material
Source: PubMed Central journal article supplement (PMC3982501)
Supplement: mt20143x7.pdf [file mt20143x7.pdf]

| Supplementary Table 2. Genomic position of LV integrations found in tumor infiltrating liver and spleen and nearest targeted gene. |               |           |             |     |           |          |              |              |      |
|------------------------------------------------------------------------------------------------------------------------------------|---------------|-----------|-------------|-----|-----------|----------|--------------|--------------|------|
| Mouse ID                                                                                                                           | Genotype      | Vector    | Tissue      | Chr | Int Locus | Sequence | Ref Seq Name | Ref Seq Syml | Gene |
|                                                                                                                                    |               |           |             |     |           | Ori      |              |              | Ori  |
| DMM85                                                                                                                              | Cdkn2a-/-_C57 | SIN.LV.SF | LIVER       | 1   | 5096114   | +        | NM_133826    | Atp6v1h      | +    |
| DMM86                                                                                                                              | Cdkn2a-/-_C57 | SIN.LV.SF | LIVER       | 1   | 5107115   | -        | NM_133826    | Atp6v1h      | +    |
| DMM82                                                                                                                              | Cdkn2a-/-_C57 | SIN.LV.SF | LIVER       | 1   | 6463212   | -        | NM_009826    | Rb1cc1       | +    |
| DMM85                                                                                                                              | Cdkn2a-/-_C57 | SIN.LV.SF | LIVER       | 1   | 7143936   | -        | NM_183028    | Pcmdt1       | +    |
| DMM86                                                                                                                              | Cdkn2a-/-_C57 | SIN.LV.SF | LIVER       | 1   | 9657554   | +        | NM_008651    | Mybl1        | -    |
| DMM80                                                                                                                              | Cdkn2a-/-_C57 | SIN.LV.SF | LIVER       | 1   | 9714594   | -        | NM_173443    | Vcpip1       | -    |
| DMM82                                                                                                                              | Cdkn2a-/-_C57 | SIN.LV.SF | VER - SPLEE | 1   | 13619918  | +        | NM_145381    | Lactb2       | -    |
| DMM85                                                                                                                              | Cdkn2a-/-_C57 | SIN.LV.SF | LIVER       | 1   | 15798891  | -        | NM_009352    | Terf1        | +    |
| DMM82                                                                                                                              | Cdkn2a-/-_C57 | SIN.LV.SF | VER - SPLEE | 1   | 19626619  | +        | NM_001025305 | Tcfap2b      | +    |
| DMM82                                                                                                                              | Cdkn2a-/-_C57 | SIN.LV.SF | SPLEEN      | 1   | 19626657  | -        | NM_001025305 | Tcfap2b      | +    |
| DMM86                                                                                                                              | Cdkn2a-/-_C57 | SIN.LV.SF | SPLEEN      | 1   | 19945340  | -        | NM_153179    | Pkhd1        | -    |
| DMM85                                                                                                                              | Cdkn2a-/-_C57 | SIN.LV.SF | LIVER       | 1   | 20808538  | +        | NM_008563    | Mcm3         | -    |
| DMM85                                                                                                                              | Cdkn2a-/-_C57 | SIN.LV.SF | LIVER       | 1   | 23867842  | -        | NM_028534    | Smap1        | -    |
| DMM82                                                                                                                              | Cdkn2a-/-_C57 | SIN.LV.SF | VER - SPLEE | 1   | 24766160  | +        | NM_026719    | Lmbrd1       | +    |
| DMM85                                                                                                                              | Cdkn2a-/-_C57 | SIN.LV.SF | LIVER       | 1   | 32305692  | -        | NM_133235    | Khdrbs2      | +    |
| DMM85                                                                                                                              | Cdkn2a-/-_C57 | SIN.LV.SF | LIVER       | 1   | 34100625  | -        | NM_133833    | Dst          | +    |
| DMM85                                                                                                                              | Cdkn2a-/-_C57 | SIN.LV.SF | LIVER       | 1   | 34885977  | -        | NM_001160235 | Fam168b      | -    |
| DMM82                                                                                                                              | Cdkn2a-/-_C57 | SIN.LV.SF | LIVER       | 1   | 37627211  | +        | NM_173870    | Mgat4a       | -    |
| DMM85                                                                                                                              | Cdkn2a-/-_C57 | SIN.LV.SF | LIVER       | 1   | 40293858  | -        | NM_008362    | Ilr1         | +    |
| DMM82                                                                                                                              | Cdkn2a-/-_C57 | SIN.LV.SF | LIVER       | 1   | 46924971  | +        | NM_172653    | Slc39a10     | -    |
| DMM85                                                                                                                              | Cdkn2a-/-_C57 | SIN.LV.SF | LIVER       | 1   | 46976860  | -        | NM_172653    | Slc39a10     | -    |
| DMM85                                                                                                                              | Cdkn2a-/-_C57 | SIN.LV.SF | LIVER       | 1   | 50890164  | -        | NM_019790    | Tmeff2       | +    |
| DMM82                                                                                                                              | Cdkn2a-/-_C57 | SIN.LV.SF | LIVER       | 1   | 53838071  | +        | NM_133810    | Stk17b       | -    |
| DMM82                                                                                                                              | Cdkn2a-/-_C57 | SIN.LV.SF | SPLEEN      | 1   | 53943282  | -        | NM_001001883 | Hecw2        | -    |
| DMM85                                                                                                                              | Cdkn2a-/-_C57 | SIN.LV.SF | LIVER       | 1   | 55783861  | +        | NM_001114663 | Plcl1        | +    |
| DMM87                                                                                                                              | Cdkn2a-/-_C57 | SIN.LV.SF | LIVER       | 1   | 58068609  | -        | NM_199007    | Sgol2        | +    |
| DMM85                                                                                                                              | Cdkn2a-/-_C57 | SIN.LV.SF | LIVER       | 1   | 58544684  | -        | NM_001025378 | Orc21        | -    |

|       |               |           |              |   |           |   |              |               |   |
|-------|---------------|-----------|--------------|---|-----------|---|--------------|---------------|---|
| DMM85 | Cdkn2a-/-_C57 | SIN.LV.SF | LIVER        | 1 | 59834728  | - | NM_007561    | Bmpr2         | + |
| DMM85 | Cdkn2a-/-_C57 | SIN.LV.SF | LIVER        | 1 | 64486916  | - | NM_001037726 | Creb1         | + |
| DMM84 | Cdkn2a-/-_C57 | SIN.LV.SF | LIVER        | 1 | 66844638  | + | NM_001122738 | 1110028C15Rik | - |
| DMM85 | Cdkn2a-/-_C57 | SIN.LV.SF | LIVER        | 1 | 69504100  | - | NM_011770    | Ikzf2         | - |
| DMM85 | Cdkn2a-/-_C57 | SIN.LV.SF | LIVER        | 1 | 71082453  | + | NM_007525    | Bard1         | - |
| DMM86 | Cdkn2a-/-_C57 | SIN.LV.SF | LIVER        | 1 | 72111385  | - | NM_001005423 | Mreg          | - |
| DMM85 | Cdkn2a-/-_C57 | SIN.LV.SF | LIVER        | 1 | 72672383  | + | NM_018817    | Smarcal1      | + |
| DMM82 | Cdkn2a-/-_C57 | SIN.LV.SF | LIVER        | 1 | 76722299  | + | NM_007936    | Epha4         | - |
| DMM87 | Cdkn2a-/-_C57 | SIN.LV.SF | SPLEEN       | 1 | 79563973  | - | NM_183027    | Ap1s3         | - |
| DMM85 | Cdkn2a-/-_C57 | SIN.LV.SF | LIVER        | 1 | 79843393  | - | NM_009255    | Serpine2      | - |
| DMM85 | Cdkn2a-/-_C57 | SIN.LV.SF | LIVER        | 1 | 80288816  | + | NM_016716    | Cul3          | - |
| DMM85 | Cdkn2a-/-_C57 | SIN.LV.SF | LIVER        | 1 | 80333958  | - | NM_016716    | Cul3          | - |
| DMM80 | Cdkn2a-/-_C57 | SIN.LV.SF | SPLEEN       | 1 | 80623257  | + | NM_175291    | Dock10        | - |
| DMM82 | Cdkn2a-/-_C57 | SIN.LV.SF | VER - SPLEEN | 1 | 82751156  | - | NM_025453    | Tm4sf20       | - |
| DMM85 | Cdkn2a-/-_C57 | SIN.LV.SF | LIVER        | 1 | 82879012  | - | NM_010472    | Agfg1         | + |
| DMM82 | Cdkn2a-/-_C57 | SIN.LV.SF | LIVER        | 1 | 88314829  | - | NM_010341    | Nmur1         | - |
| DMM85 | Cdkn2a-/-_C57 | SIN.LV.SF | LIVER        | 1 | 93046740  | + | NM_001033408 | Rbm44         | + |
| DMM85 | Cdkn2a-/-_C57 | SIN.LV.SF | LIVER        | 1 | 97171220  | - | NM_026321    | Fam174a       | + |
| DMM82 | Cdkn2a-/-_C57 | SIN.LV.SF | VER - SPLEEN | 1 | 97512411  | - | NM_009183    | St8sia4       | - |
| DMM80 | Cdkn2a-/-_C57 | SIN.LV.SF | LIVER        | 1 | 99618989  | + | NM_173760    | Hisppd1       | - |
| DMM82 | Cdkn2a-/-_C57 | SIN.LV.SF | VER - SPLEEN | 1 | 99649888  | - | NM_173760    | Hisppd1       | - |
| DMM87 | Cdkn2a-/-_C57 | SIN.LV.SF | SPLEEN       | 1 | 99811371  | + | NM_013626    | Pam           | - |
| DMM85 | Cdkn2a-/-_C57 | SIN.LV.SF | LIVER        | 1 | 108639858 | + | NM_027534    | Kdsr          | - |
| DMM87 | Cdkn2a-/-_C57 | SIN.LV.SF | LIVER        | 1 | 108838533 | + | NM_027971    | Serpinb12     | + |
| DMM85 | Cdkn2a-/-_C57 | SIN.LV.SF | LIVER        | 1 | 109294572 | + | NM_025867    | Serpinb11     | + |
| DMM80 | Cdkn2a-/-_C57 | SIN.LV.SF | VER - SPLEEN | 1 | 109341313 | - | NM_027548    | Serpinb7      | + |
| DMM85 | Cdkn2a-/-_C57 | SIN.LV.SF | LIVER        | 1 | 110156419 | - | NM_011459    | Serpinb8      | + |
| DMM85 | Cdkn2a-/-_C57 | SIN.LV.SF | LIVER        | 1 | 120293433 | - | NM_001081276 | Clasp1        | + |
| DMM85 | Cdkn2a-/-_C57 | SIN.LV.SF | LIVER        | 1 | 120456257 | - | NM_001081276 | Clasp1        | + |
| DMM82 | Cdkn2a-/-_C57 | SIN.LV.SF | VER - SPLEEN | 1 | 121695158 | + | NM_019933    | Ptpn4         | - |
| DMM85 | Cdkn2a-/-_C57 | SIN.LV.SF | LIVER        | 1 | 125795690 | + | NM_199021    | Dpp10         | - |

|       |               |           |             |   |           |   |              |               |   |
|-------|---------------|-----------|-------------|---|-----------|---|--------------|---------------|---|
| DMM87 | Cdkn2a-/-_C57 | SIN.LV.SF | LIVER       | 1 | 127322382 | - | NM_023735    | Actr3         | - |
| DMM80 | Cdkn2a-/-_C57 | SIN.LV.SF | LIVER       | 1 | 127425385 | + | NM_028787    | Slc35f5       | + |
| DMM85 | Cdkn2a-/-_C57 | SIN.LV.SF | SPLEEN      | 1 | 128944543 | + | NM_145128    | Mgat5         | + |
| DMM85 | Cdkn2a-/-_C57 | SIN.LV.SF | LIVER       | 1 | 129795000 | - | NM_178690    | Rab3gap1      | + |
| DMM80 | Cdkn2a-/-_C57 | SIN.LV.SF | LIVER       | 1 | 130040665 | + | NM_181750    | R3hdm1        | + |
| DMM82 | Cdkn2a-/-_C57 | SIN.LV.SF | VER - SPLEE | 1 | 130407561 | - | NM_009911    | Cxcr4         | - |
| DMM85 | Cdkn2a-/-_C57 | SIN.LV.SF | LIVER       | 1 | 139816719 | + | NM_001111316 | Ptprc         | - |
| DMM85 | Cdkn2a-/-_C57 | SIN.LV.SF | LIVER       | 1 | 139990522 | - | NM_001111316 | Ptprc         | - |
| DMM85 | Cdkn2a-/-_C57 | SIN.LV.SF | LIVER       | 1 | 142065401 | - | NM_009888    | Cfh           | - |
| DMM82 | Cdkn2a-/-_C57 | SIN.LV.SF | VER - SPLEE | 1 | 142101310 | + | NM_009888    | Cfh           | - |
| DMM85 | Cdkn2a-/-_C57 | SIN.LV.SF | LIVER       | 1 | 146057277 | + | NM_153171    | Rgs13         | - |
| DMM85 | Cdkn2a-/-_C57 | SIN.LV.SF | LIVER       | 1 | 150517122 | + | NM_008869    | Pla2g4a       | - |
| DMM85 | Cdkn2a-/-_C57 | SIN.LV.SF | LIVER       | 1 | 150718798 | - | NM_008869    | Pla2g4a       | - |
| DMM82 | Cdkn2a-/-_C57 | SIN.LV.SF | VER - SPLEE | 1 | 150759658 | + | NM_008869    | Pla2g4a       | - |
| DMM87 | Cdkn2a-/-_C57 | SIN.LV.SF | LIVER       | 1 | 150773193 | + | NM_008869    | Pla2g4a       | - |
| DMM80 | Cdkn2a-/-_C57 | SIN.LV.SF | LIVER       | 1 | 153233635 | - | NM_025819    | 1200016B10Rik | - |
| DMM85 | Cdkn2a-/-_C57 | SIN.LV.SF | LIVER       | 1 | 153430853 | - | NM_022018    | Fam129a       | + |
| DMM86 | Cdkn2a-/-_C57 | SIN.LV.SF | LIVER       | 1 | 158548099 | - | NM_001136104 | Abl2          | + |
| DMM80 | Cdkn2a-/-_C57 | SIN.LV.SF | LIVER       | 1 | 161195574 | + | NM_011931    | Rfwd2         | + |
| DMM85 | Cdkn2a-/-_C57 | SIN.LV.SF | LIVER       | 1 | 162138853 | + | NM_009786    | Cacybp        | - |
| DMM85 | Cdkn2a-/-_C57 | SIN.LV.SF | LIVER       | 1 | 165721831 | - | NM_010629    | Kifap3        | + |
| DMM85 | Cdkn2a-/-_C57 | SIN.LV.SF | LIVER       | 1 | 165752714 | - | NM_010629    | Kifap3        | + |
| DMM86 | Cdkn2a-/-_C57 | SIN.LV.SF | LIVER       | 1 | 165778248 | - | NM_010629    | Kifap3        | + |
| DMM85 | Cdkn2a-/-_C57 | SIN.LV.SF | LIVER       | 1 | 174308767 | - | NM_026234    | Pigm          | + |
| DMM82 | Cdkn2a-/-_C57 | SIN.LV.SF | SPLEEN      | 1 | 178683111 | - | NM_001099637 | Cep170        | - |
| DMM85 | Cdkn2a-/-_C57 | SIN.LV.SF | LIVER       | 1 | 178706642 | + | NM_001099637 | Cep170        | - |
| DMM85 | Cdkn2a-/-_C57 | SIN.LV.SF | LIVER       | 1 | 178884953 | + | NM_029756    | Sdccag8       | + |
| DMM82 | Cdkn2a-/-_C57 | SIN.LV.SF | LIVER       | 1 | 190795041 | - | NM_172650    | Kctd3         | - |
| DMM85 | Cdkn2a-/-_C57 | SIN.LV.SF | LIVER       | 1 | 194590195 | - | NM_144881    | Hhat          | - |
| DMM85 | Cdkn2a-/-_C57 | SIN.LV.SF | LIVER       | 1 | 196849520 | + | NM_010778    | Cd46          | - |
| DMM85 | Cdkn2a-/-_C57 | SIN.LV.SF | LIVER       | 1 | 196945958 | - | NM_013499    | Cr11          | - |

|       |               |           |                |   |          |   |              |          |   |
|-------|---------------|-----------|----------------|---|----------|---|--------------|----------|---|
| DMM80 | Cdkn2a-/-_C57 | SIN.LV.SF | LIVER          | 2 | 5950410  | + | NM_001081132 | Upf2     | + |
| DMM86 | Cdkn2a-/-_C57 | SIN.LV.SF | LIVER          | 2 | 9936990  | + | NM_027748    | Taf3     | - |
| DMM85 | Cdkn2a-/-_C57 | SIN.LV.SF | LIVER          | 2 | 14191134 | - | NM_008625    | Mrc1     | + |
| DMM85 | Cdkn2a-/-_C57 | SIN.LV.SF | LIVER          | 2 | 18214211 | + | NM_007869    | Dnajc1   | - |
| DMM86 | Cdkn2a-/-_C57 | SIN.LV.SF | LIVER          | 2 | 18297497 | - | NM_007869    | Dnajc1   | - |
| DMM86 | Cdkn2a-/-_C57 | SIN.LV.SF | LIVER          | 2 | 23033471 | + | NM_013771    | Yme111   | + |
| DMM85 | Cdkn2a-/-_C57 | SIN.LV.SF | LIVER          | 2 | 37291259 | + | NM_199025    | Zbtb26   | - |
| DMM85 | Cdkn2a-/-_C57 | SIN.LV.SF | LIVER          | 2 | 42039986 | - | NM_053011    | Lrp1b    | - |
| DMM80 | Cdkn2a-/-_C57 | SIN.LV.SF | LIVER - SPLEEN | 2 | 43406344 | + | NM_027552    | Kynu     | + |
| DMM80 | Cdkn2a-/-_C57 | SIN.LV.SF | SPLEEN         | 2 | 43406637 | - | NM_027552    | Kynu     | + |
| DMM86 | Cdkn2a-/-_C57 | SIN.LV.SF | LIVER          | 2 | 43788877 | + | NM_153820    | Arhgap15 | + |
| DMM87 | Cdkn2a-/-_C57 | SIN.LV.SF | LIVER          | 2 | 45186123 | - | NM_015753    | Zeb2     | - |
| DMM85 | Cdkn2a-/-_C57 | SIN.LV.SF | LIVER          | 2 | 45813230 | + | NM_015753    | Zeb2     | - |
| DMM84 | Cdkn2a-/-_C57 | SIN.LV.SF | LIVER          | 2 | 48864734 | - | NM_029924    | Mbd5     | + |
| DMM87 | Cdkn2a-/-_C57 | SIN.LV.SF | SPLEEN         | 2 | 48921632 | - | NM_029924    | Mbd5     | + |
| DMM85 | Cdkn2a-/-_C57 | SIN.LV.SF | LIVER          | 2 | 49233930 | - | NM_029924    | Mbd5     | + |
| DMM85 | Cdkn2a-/-_C57 | SIN.LV.SF | LIVER          | 2 | 51942484 | - | NM_175238    | Rif1     | + |
| DMM85 | Cdkn2a-/-_C57 | SIN.LV.SF | LIVER          | 2 | 57114083 | + | NM_010274    | Gpd2     | + |
| DMM85 | Cdkn2a-/-_C57 | SIN.LV.SF | LIVER          | 2 | 59803646 | + | NM_001001182 | Baz2b    | - |
| DMM82 | Cdkn2a-/-_C57 | SIN.LV.SF | LIVER          | 2 | 66024312 | + | NM_001047604 | Ttc21b   | - |
| DMM86 | Cdkn2a-/-_C57 | SIN.LV.SF | LIVER          | 2 | 66089333 | - | NM_001047604 | Ttc21b   | - |
| DMM85 | Cdkn2a-/-_C57 | SIN.LV.SF | LIVER          | 2 | 73691256 | - | NM_001025093 | Atf2     | - |
| DMM85 | Cdkn2a-/-_C57 | SIN.LV.SF | LIVER          | 2 | 74705295 | - | NM_016804    | Mtx2     | + |
| DMM85 | Cdkn2a-/-_C57 | SIN.LV.SF | LIVER          | 2 | 75531931 | - | NM_010902    | Nfe2l2   | - |
| DMM85 | Cdkn2a-/-_C57 | SIN.LV.SF | LIVER          | 2 | 76529304 | - | NM_031256    | Plekha3  | + |
| DMM85 | Cdkn2a-/-_C57 | SIN.LV.SF | LIVER          | 2 | 77875105 | + | NM_030560    | Cwc22    | - |
| DMM82 | Cdkn2a-/-_C57 | SIN.LV.SF | LIVER          | 2 | 78719555 | + | NM_009454    | Ube2e3   | + |
| DMM85 | Cdkn2a-/-_C57 | SIN.LV.SF | LIVER          | 2 | 80493698 | - | NM_027091    | Nup35    | + |
| DMM85 | Cdkn2a-/-_C57 | SIN.LV.SF | LIVER          | 2 | 81841859 | + | NM_175513    | Zfp804a  | + |
| DMM85 | Cdkn2a-/-_C57 | SIN.LV.SF | LIVER          | 2 | 84096436 | - | NM_018782    | Calcr1   | - |
| DMM85 | Cdkn2a-/-_C57 | SIN.LV.SF | LIVER          | 2 | 84171654 | - | NM_018782    | Calcr1   | - |

|       |               |           |              |   |           |   |              |               |   |
|-------|---------------|-----------|--------------|---|-----------|---|--------------|---------------|---|
| DMM84 | Cdkn2a-/-_C57 | SIN.LV.SF | LIVER        | 2 | 98502572  | - | NM_178725    | Lrrc4c        | + |
| DMM84 | Cdkn2a-/-_C57 | SIN.LV.SF | LIVER        | 2 | 98503136  | - | NM_178725    | Lrrc4c        | + |
| DMM86 | Cdkn2a-/-_C57 | SIN.LV.SF | LIVER        | 2 | 98507190  | - | NM_178725    | Lrrc4c        | + |
| DMM87 | Cdkn2a-/-_C57 | SIN.LV.SF | SPLEEN       | 2 | 102875828 | - | NM_175094    | Pdhx          | - |
| DMM85 | Cdkn2a-/-_C57 | SIN.LV.SF | LIVER        | 2 | 109107079 | - | NM_029790    | Mett5d1       | - |
| DMM85 | Cdkn2a-/-_C57 | SIN.LV.SF | LIVER        | 2 | 112131397 | + | NM_133648    | Slc12a6       | + |
| DMM85 | Cdkn2a-/-_C57 | SIN.LV.SF | LIVER        | 2 | 112187659 | - | NM_133648    | Slc12a6       | + |
| DMM85 | Cdkn2a-/-_C57 | SIN.LV.SF | LIVER        | 2 | 112249720 | - | NM_024254    | 2410042D21Rik | + |
| DMM82 | Cdkn2a-/-_C57 | SIN.LV.SF | SPLEEN       | 2 | 113324320 | - | NM_001043322 | Fmn1          | + |
| DMM85 | Cdkn2a-/-_C57 | SIN.LV.SF | LIVER        | 2 | 113977170 | - | NM_009702    | Aqr           | - |
| DMM84 | Cdkn2a-/-_C57 | SIN.LV.SF | LIVER        | 2 | 115445582 | + | NM_001145898 | BC052040      | + |
| DMM85 | Cdkn2a-/-_C57 | SIN.LV.SF | VER - SPLEEN | 2 | 120540834 | - | NM_026891    | Cdan1         | - |
| DMM85 | Cdkn2a-/-_C57 | SIN.LV.SF | LIVER        | 2 | 121793662 | + | NM_212450    | Ctdsp12       | + |
| DMM86 | Cdkn2a-/-_C57 | SIN.LV.SF | LIVER        | 2 | 125677653 | + | NM_009939    | Cops2         | - |
| DMM85 | Cdkn2a-/-_C57 | SIN.LV.SF | LIVER        | 2 | 131108130 | + | NM_153501    | Pank2         | + |
| DMM85 | Cdkn2a-/-_C57 | SIN.LV.SF | LIVER        | 2 | 133295232 | + | NM_007553    | Bmp2          | + |
| DMM85 | Cdkn2a-/-_C57 | SIN.LV.SF | LIVER        | 2 | 136748857 | - | NM_001038641 | 2210009G21Rik | + |
| DMM85 | Cdkn2a-/-_C57 | SIN.LV.SF | LIVER        | 2 | 138086557 | - | NM_001025431 | Btdb3         | + |
| DMM85 | Cdkn2a-/-_C57 | SIN.LV.SF | LIVER        | 2 | 141253379 | - | NM_001013802 | MacroD2       | + |
| DMM85 | Cdkn2a-/-_C57 | SIN.LV.SF | LIVER        | 2 | 143822904 | + | NM_133626    | Rrbp1         | - |
| DMM85 | Cdkn2a-/-_C57 | SIN.LV.SF | LIVER        | 2 | 146243784 | - | NM_001033348 | A230067G21Rik | - |
| DMM82 | Cdkn2a-/-_C57 | SIN.LV.SF | LIVER        | 2 | 146475280 | + | NM_001033348 | A230067G21Rik | - |
| DMM85 | Cdkn2a-/-_C57 | SIN.LV.SF | LIVER        | 2 | 146723541 | - | NM_001033298 | Ncrna00153    | + |
| DMM86 | Cdkn2a-/-_C57 | SIN.LV.SF | SPLEEN       | 2 | 151326810 | - | NM_198326    | Nsfl1c        | + |
| DMM85 | Cdkn2a-/-_C57 | SIN.LV.SF | LIVER        | 2 | 157877068 | + | NM_027434    | Rprd1b        | + |
| DMM85 | Cdkn2a-/-_C57 | SIN.LV.SF | LIVER        | 2 | 173907392 | - | NM_001102423 | Stx16         | + |
| DMM82 | Cdkn2a-/-_C57 | SIN.LV.SF | SPLEEN       | 3 | 5573131   | - | NM_008994    | Pxmp3         | - |
| DMM82 | Cdkn2a-/-_C57 | SIN.LV.SF | VER - SPLEEN | 3 | 5573167   | - | NM_008994    | Pxmp3         | - |
| DMM85 | Cdkn2a-/-_C57 | SIN.LV.SF | LIVER        | 3 | 5573683   | - | NM_008994    | Pxmp3         | - |
| DMM86 | Cdkn2a-/-_C57 | SIN.LV.SF | LIVER        | 3 | 8889240   | - | NM_025434    | Mrps28        | - |
| DMM85 | Cdkn2a-/-_C57 | SIN.LV.SF | LIVER        | 3 | 8932114   | + | NM_001025261 | Tpd52         | - |

|       |               |           |              |   |          |   |              |            |   |
|-------|---------------|-----------|--------------|---|----------|---|--------------|------------|---|
| DMM85 | Cdkn2a-/-_C57 | SIN.LV.SF | LIVER        | 3 | 8979550  | - | NM_001025263 | Tpd52      | - |
| DMM82 | Cdkn2a-/-_C57 | SIN.LV.SF | LIVER        | 3 | 12370115 | + | NM_178631    | Raly1      | + |
| DMM85 | Cdkn2a-/-_C57 | SIN.LV.SF | LIVER        | 3 | 13725177 | - | NM_178631    | Raly1      | + |
| DMM85 | Cdkn2a-/-_C57 | SIN.LV.SF | LIVER        | 3 | 15300319 | - | NM_001076679 | Gm9733     | - |
| DMM82 | Cdkn2a-/-_C57 | SIN.LV.SF | VER - SPLEEN | 3 | 16107365 | - | NM_001145919 | Ythdf3     | + |
| DMM82 | Cdkn2a-/-_C57 | SIN.LV.SF | LIVER        | 3 | 18569347 | + | NM_007825    | Cyp7b1     | - |
| DMM82 | Cdkn2a-/-_C57 | SIN.LV.SF | SPLEEN       | 3 | 19343802 | + | NM_025489    | Dnaje5b    | + |
| DMM87 | Cdkn2a-/-_C57 | SIN.LV.SF | LIVER        | 3 | 19546616 | + | NM_001081281 | Trim55     | + |
| DMM85 | Cdkn2a-/-_C57 | SIN.LV.SF | LIVER        | 3 | 21402569 | - | NM_030732    | Tbl1xr1    | + |
| DMM85 | Cdkn2a-/-_C57 | SIN.LV.SF | LIVER        | 3 | 21964368 | + | NM_030732    | Tbl1xr1    | + |
| DMM82 | Cdkn2a-/-_C57 | SIN.LV.SF | LIVER        | 3 | 22073520 | + | NM_030732    | Tbl1xr1    | + |
| DMM82 | Cdkn2a-/-_C57 | SIN.LV.SF | VER - SPLEEN | 3 | 22073778 | - | NM_030732    | Tbl1xr1    | + |
| DMM85 | Cdkn2a-/-_C57 | SIN.LV.SF | LIVER        | 3 | 22100626 | + | NM_030732    | Tbl1xr1    | + |
| DMM85 | Cdkn2a-/-_C57 | SIN.LV.SF | LIVER        | 3 | 23890498 | + | NM_138666    | Nlgn1      | - |
| DMM85 | Cdkn2a-/-_C57 | SIN.LV.SF | LIVER        | 3 | 27166172 | + | NM_178772    | Aadac11    | + |
| DMM82 | Cdkn2a-/-_C57 | SIN.LV.SF | LIVER        | 3 | 29120659 | + | NM_001033479 | Gm1527     | + |
| DMM85 | Cdkn2a-/-_C57 | SIN.LV.SF | LIVER        | 3 | 30033973 | - | NM_021442    | Mds1       | - |
| DMM80 | Cdkn2a-/-_C57 | SIN.LV.SF | LIVER        | 3 | 35733380 | - | NM_029570    | Atp11b     | + |
| DMM85 | Cdkn2a-/-_C57 | SIN.LV.SF | LIVER        | 3 | 35743021 | - | NM_029570    | Atp11b     | + |
| DMM85 | Cdkn2a-/-_C57 | SIN.LV.SF | LIVER        | 3 | 40495601 | - | NM_175515    | Intu       | + |
| DMM85 | Cdkn2a-/-_C57 | SIN.LV.SF | LIVER        | 3 | 40778246 | + | NM_001040399 | Larp2      | + |
| DMM82 | Cdkn2a-/-_C57 | SIN.LV.SF | VER - SPLEEN | 3 | 41513222 | + | NM_001081411 | Sclt1      | - |
| DMM85 | Cdkn2a-/-_C57 | SIN.LV.SF | LIVER        | 3 | 41709691 | - | NM_001099785 | D3ErtD751e | + |
| DMM85 | Cdkn2a-/-_C57 | SIN.LV.SF | LIVER        | 3 | 41737272 | + | NM_001099785 | D3ErtD751e | + |
| DMM87 | Cdkn2a-/-_C57 | SIN.LV.SF | LIVER        | 3 | 50193209 | - | NM_011990    | Slc7a11    | - |
| DMM86 | Cdkn2a-/-_C57 | SIN.LV.SF | LIVER        | 3 | 51261228 | + | NM_053089    | Narg1      | + |
| DMM85 | Cdkn2a-/-_C57 | SIN.LV.SF | LIVER        | 3 | 51275889 | + | NM_053089    | Narg1      | + |
| DMM85 | Cdkn2a-/-_C57 | SIN.LV.SF | LIVER        | 3 | 51581156 | + | NM_001004176 | Maml3      | - |
| DMM85 | Cdkn2a-/-_C57 | SIN.LV.SF | LIVER        | 3 | 51738929 | + | NM_001004176 | Maml3      | - |
| DMM85 | Cdkn2a-/-_C57 | SIN.LV.SF | LIVER        | 3 | 55623539 | - | NM_030595    | Nbea       | - |
| DMM82 | Cdkn2a-/-_C57 | SIN.LV.SF | VER - SPLEEN | 3 | 58972836 | + | NM_032399    | Gpr87      | - |

|       |               |           |        |   |           |   |              |               |   |
|-------|---------------|-----------|--------|---|-----------|---|--------------|---------------|---|
| DMM86 | Cdkn2a-/-_C57 | SIN.LV.SF | LIVER  | 3 | 59072955  | - | NM_027571    | P2ry12        | - |
| DMM84 | Cdkn2a-/-_C57 | SIN.LV.SF | LIVER  | 3 | 60157821  | - | NM_020007    | Mbnl1         | + |
| DMM82 | Cdkn2a-/-_C57 | SIN.LV.SF | LIVER  | 3 | 60748639  | - | NM_008772    | P2ry1         | + |
| DMM85 | Cdkn2a-/-_C57 | SIN.LV.SF | LIVER  | 3 | 66819529  | - | NM_025822    | Rsrc1         | + |
| DMM85 | Cdkn2a-/-_C57 | SIN.LV.SF | LIVER  | 3 | 67257592  | + | NM_138591    | Gfm1          | + |
| DMM87 | Cdkn2a-/-_C57 | SIN.LV.SF | LIVER  | 3 | 67891685  | + | NM_001113420 | Schip1        | + |
| DMM85 | Cdkn2a-/-_C57 | SIN.LV.SF | LIVER  | 3 | 68948431  | - | NM_008467    | Kpna4         | - |
| DMM85 | Cdkn2a-/-_C57 | SIN.LV.SF | LIVER  | 3 | 78990669  | - | NM_001099624 | Rapgef2       | - |
| DMM86 | Cdkn2a-/-_C57 | SIN.LV.SF | LIVER  | 3 | 81754775  | - | NM_177662    | Ctso          | + |
| DMM80 | Cdkn2a-/-_C57 | SIN.LV.SF | LIVER  | 3 | 83685087  | - | NM_172681    | D930015E06Rik | - |
| DMM85 | Cdkn2a-/-_C57 | SIN.LV.SF | LIVER  | 3 | 85902678  | - | NM_001082414 | Sh3d19        | + |
| DMM85 | Cdkn2a-/-_C57 | SIN.LV.SF | LIVER  | 3 | 88708296  | - | NM_027389    | 5830417I10Rik | + |
| DMM86 | Cdkn2a-/-_C57 | SIN.LV.SF | LIVER  | 3 | 97853639  | - | NM_010928    | Notch2        | + |
| DMM82 | Cdkn2a-/-_C57 | SIN.LV.SF | LIVER  | 3 | 98644152  | + | NM_008293    | Hsd3b1        | - |
| DMM87 | Cdkn2a-/-_C57 | SIN.LV.SF | SPLEEN | 3 | 98958567  | + | NM_027462    | Wars2         | + |
| DMM85 | Cdkn2a-/-_C57 | SIN.LV.SF | LIVER  | 3 | 100395011 | - | NM_010763    | Man1a2        | - |
| DMM84 | Cdkn2a-/-_C57 | SIN.LV.SF | LIVER  | 3 | 103890022 | + | NM_001159354 | Magi3         | - |
| DMM84 | Cdkn2a-/-_C57 | SIN.LV.SF | LIVER  | 3 | 105555798 | + | NM_145541    | Rap1a         | - |
| DMM85 | Cdkn2a-/-_C57 | SIN.LV.SF | LIVER  | 3 | 107112691 | - | NM_146136    | Slc16a4       | + |
| DMM85 | Cdkn2a-/-_C57 | SIN.LV.SF | LIVER  | 3 | 113324143 | + | NM_001038696 | Rnpc3         | - |
| DMM87 | Cdkn2a-/-_C57 | SIN.LV.SF | LIVER  | 3 | 113676304 | - | NM_007729    | Col11a1       | + |
| DMM85 | Cdkn2a-/-_C57 | SIN.LV.SF | LIVER  | 3 | 114664936 | + | NM_153458    | Olfm3         | + |
| DMM85 | Cdkn2a-/-_C57 | SIN.LV.SF | LIVER  | 3 | 115801426 | - | NM_011693    | Vcam1         | - |
| DMM87 | Cdkn2a-/-_C57 | SIN.LV.SF | LIVER  | 3 | 117033875 | - | NM_177664    | D3Bwg0562e    | - |
| DMM85 | Cdkn2a-/-_C57 | SIN.LV.SF | LIVER  | 3 | 121493717 | + | NM_008991    | Abcd3         | - |
| DMM86 | Cdkn2a-/-_C57 | SIN.LV.SF | LIVER  | 3 | 123032583 | - | NM_027135    | Sec24d        | + |
| DMM86 | Cdkn2a-/-_C57 | SIN.LV.SF | LIVER  | 3 | 126624587 | + | NM_001034168 | Ank2          | - |
| DMM85 | Cdkn2a-/-_C57 | SIN.LV.SF | LIVER  | 3 | 129717613 | + | NM_207209    | Sec24b        | - |
| DMM85 | Cdkn2a-/-_C57 | SIN.LV.SF | LIVER  | 3 | 131554647 | - | NM_020265    | Dkk2          | + |
| DMM85 | Cdkn2a-/-_C57 | SIN.LV.SF | LIVER  | 3 | 131844157 | + | NM_020265    | Dkk2          | + |
| DMM85 | Cdkn2a-/-_C57 | SIN.LV.SF | LIVER  | 3 | 132675752 | - | NM_026231    | Gsted         | - |

|       |               |           |             |   |           |   |              |               |   |
|-------|---------------|-----------|-------------|---|-----------|---|--------------|---------------|---|
| DMM82 | Cdkn2a-/-_C57 | SIN.LV.SF | LIVER       | 3 | 136814164 | + | NM_016885    | Emcn          | + |
| DMM85 | Cdkn2a-/-_C57 | SIN.LV.SF | LIVER       | 3 | 138138962 | - | NM_175224    | Metap1        | - |
| DMM85 | Cdkn2a-/-_C57 | SIN.LV.SF | LIVER       | 3 | 138939494 | + | NM_198659    | B930007M17Rik | + |
| DMM85 | Cdkn2a-/-_C57 | SIN.LV.SF | LIVER       | 3 | 142054173 | + | NM_022554    | Pdlim5        | - |
| DMM85 | Cdkn2a-/-_C57 | SIN.LV.SF | LIVER       | 3 | 142462362 | + | NM_178654    | Pkn2          | - |
| DMM85 | Cdkn2a-/-_C57 | SIN.LV.SF | LIVER       | 3 | 142527812 | - | NM_178654    | Pkn2          | - |
| DMM85 | Cdkn2a-/-_C57 | SIN.LV.SF | LIVER       | 3 | 144228175 | - | NM_011828    | Hs2st1        | - |
| DMM85 | Cdkn2a-/-_C57 | SIN.LV.SF | VER - SPLEE | 3 | 144259236 | - | NM_053102    | 15-Sep        | + |
| DMM86 | Cdkn2a-/-_C57 | SIN.LV.SF | LIVER       | 3 | 147984932 | + | NM_001081298 | Lphn2         | - |
| DMM86 | Cdkn2a-/-_C57 | SIN.LV.SF | LIVER       | 3 | 153569336 | - | NM_031870    | Msh4          | - |
| DMM85 | Cdkn2a-/-_C57 | SIN.LV.SF | LIVER       | 3 | 159184368 | - | NM_029523    | Depdc1a       | + |
| DMM85 | Cdkn2a-/-_C57 | SIN.LV.SF | LIVER       | 3 | 159510556 | - | NM_026582    | Gpr177        | + |
| DMM85 | Cdkn2a-/-_C57 | SIN.LV.SF | LIVER       | 3 | 159546337 | - | NM_026582    | Gpr177        | + |
| DMM85 | Cdkn2a-/-_C57 | SIN.LV.SF | LIVER       | 4 | 3712409   | + | NM_001111096 | Lyn           | + |
| DMM82 | Cdkn2a-/-_C57 | SIN.LV.SF | LIVER       | 4 | 4697170   | - | NM_177730    | Impad1        | - |
| DMM85 | Cdkn2a-/-_C57 | SIN.LV.SF | LIVER       | 4 | 7241310   | - | NM_145711    | Tox           | - |
| DMM85 | Cdkn2a-/-_C57 | SIN.LV.SF | LIVER       | 4 | 7409550   | + | NM_145711    | Tox           | - |
| DMM85 | Cdkn2a-/-_C57 | SIN.LV.SF | LIVER       | 4 | 8897208   | + | NM_001081417 | Chd7          | + |
| DMM85 | Cdkn2a-/-_C57 | SIN.LV.SF | LIVER       | 4 | 9176650   | - | NM_028940    | Rlbp111       | + |
| DMM85 | Cdkn2a-/-_C57 | SIN.LV.SF | LIVER       | 4 | 9431200   | - | NM_023066    | Asph          | - |
| DMM84 | Cdkn2a-/-_C57 | SIN.LV.SF | LIVER       | 4 | 12005916  | + | NM_177861    | Tmem67        | - |
| DMM85 | Cdkn2a-/-_C57 | SIN.LV.SF | LIVER       | 4 | 12390136  | + | NM_026558    | Fam92a        | - |
| DMM85 | Cdkn2a-/-_C57 | SIN.LV.SF | LIVER       | 4 | 12698099  | - | NM_173746    | Gm11818       | + |
| DMM82 | Cdkn2a-/-_C57 | SIN.LV.SF | VER - SPLEE | 4 | 15852986  | - | NM_026172    | Decr1         | - |
| DMM85 | Cdkn2a-/-_C57 | SIN.LV.SF | LIVER       | 4 | 19790354  | - | NM_175406    | Atp6v0d2      | - |
| DMM85 | Cdkn2a-/-_C57 | SIN.LV.SF | LIVER       | 4 | 22302813  | + | NM_172988    | Fbx14         | + |
| DMM82 | Cdkn2a-/-_C57 | SIN.LV.SF | LIVER       | 4 | 22337548  | + | NM_172988    | Fbx14         | + |
| DMM85 | Cdkn2a-/-_C57 | SIN.LV.SF | LIVER       | 4 | 25186110  | - | NM_026194    | 1810074P20Rik | - |
| DMM85 | Cdkn2a-/-_C57 | SIN.LV.SF | LIVER       | 4 | 26271516  | + | NM_172865    | Manea         | - |
| DMM84 | Cdkn2a-/-_C57 | SIN.LV.SF | LIVER       | 4 | 26275459  | - | NM_172865    | Manea         | - |
| DMM85 | Cdkn2a-/-_C57 | SIN.LV.SF | LIVER       | 4 | 28874463  | + | NM_001122889 | Epha7         | + |



|       |               |           |             |   |           |   |              |               |   |
|-------|---------------|-----------|-------------|---|-----------|---|--------------|---------------|---|
| DMM85 | Cdkn2a-/-_C57 | SIN.LV.SF | VER - SPLEE | 4 | 29321478  | + | NM_010141    | Epha7         | + |
| DMM84 | Cdkn2a-/-_C57 | SIN.LV.SF | LIVER       | 4 | 32089412  | - | NM_172688    | Map3k7        | + |
| DMM86 | Cdkn2a-/-_C57 | SIN.LV.SF | VER - SPLEE | 4 | 33134552  | + | NM_019586    | Ube2j1        | + |
| DMM85 | Cdkn2a-/-_C57 | SIN.LV.SF | LIVER       | 4 | 33443743  | - | NM_011884    | Rngtt         | + |
| DMM85 | Cdkn2a-/-_C57 | SIN.LV.SF | LIVER       | 4 | 34503529  | - | NM_001007589 | Akirin2       | + |
| DMM85 | Cdkn2a-/-_C57 | SIN.LV.SF | LIVER       | 4 | 34961030  | - | NM_178061    | Mobk12b       | - |
| DMM86 | Cdkn2a-/-_C57 | SIN.LV.SF | LIVER       | 4 | 39433040  | + | NM_001081095 | 1700009N14Rik | + |
| DMM80 | Cdkn2a-/-_C57 | SIN.LV.SF | LIVER       | 4 | 44784353  | + | NM_138590    | Zcchc7        | + |
| DMM85 | Cdkn2a-/-_C57 | SIN.LV.SF | LIVER       | 4 | 45361572  | + | NM_153167    | Wdr32         | + |
| DMM85 | Cdkn2a-/-_C57 | SIN.LV.SF | LIVER       | 4 | 56218575  | + | NM_025271    | Act17b        | - |
| DMM84 | Cdkn2a-/-_C57 | SIN.LV.SF | VER - SPLEE | 4 | 57050020  | - | NM_019427    | Epb4.114b     | - |
| DMM85 | Cdkn2a-/-_C57 | SIN.LV.SF | LIVER       | 4 | 62751700  | + | NM_007443    | Ambp          | - |
| DMM85 | Cdkn2a-/-_C57 | SIN.LV.SF | LIVER       | 4 | 66484718  | - | NM_021297    | Tlr4          | + |
| DMM82 | Cdkn2a-/-_C57 | SIN.LV.SF | LIVER       | 4 | 70151053  | + | NM_172694    | Megf9         | - |
| DMM85 | Cdkn2a-/-_C57 | SIN.LV.SF | LIVER       | 4 | 70185481  | + | NM_172694    | Megf9         | - |
| DMM84 | Cdkn2a-/-_C57 | SIN.LV.SF | LIVER       | 4 | 70914448  | + | NM_172694    | Megf9         | - |
| DMM85 | Cdkn2a-/-_C57 | SIN.LV.SF | LIVER       | 4 | 71850109  | + | NM_011599    | Tle1          | - |
| DMM85 | Cdkn2a-/-_C57 | SIN.LV.SF | LIVER       | 4 | 72081287  | - | NM_011599    | Tle1          | - |
| DMM86 | Cdkn2a-/-_C57 | SIN.LV.SF | LIVER       | 4 | 73949694  | + | NM_144787    | Kdm4c         | + |
| DMM85 | Cdkn2a-/-_C57 | SIN.LV.SF | LIVER       | 4 | 79952001  | + | NM_031202    | Tyrp1         | + |
| DMM85 | Cdkn2a-/-_C57 | SIN.LV.SF | LIVER       | 4 | 84718631  | + | NM_175275    | Cntln         | + |
| DMM85 | Cdkn2a-/-_C57 | SIN.LV.SF | LIVER       | 4 | 85388677  | - | NM_029967    | Adamts1       | + |
| DMM82 | Cdkn2a-/-_C57 | SIN.LV.SF | LIVER       | 4 | 87761941  | + | NM_001081184 | BC057079      | + |
| DMM85 | Cdkn2a-/-_C57 | SIN.LV.SF | LIVER       | 4 | 87865807  | - | NM_001081184 | BC057079      | + |
| DMM87 | Cdkn2a-/-_C57 | SIN.LV.SF | LIVER       | 4 | 94904372  | - | NM_010591    | Jun           | - |
| DMM87 | Cdkn2a-/-_C57 | SIN.LV.SF | SPLEEN      | 4 | 98756582  | - | NM_026082    | Dock7         | - |
| DMM82 | Cdkn2a-/-_C57 | SIN.LV.SF | SPLEEN      | 4 | 98896801  | - | NM_001145967 | Atg4c         | + |
| DMM84 | Cdkn2a-/-_C57 | SIN.LV.SF | LIVER       | 4 | 101438633 | + | NM_010704    | Lepr          | + |
| DMM85 | Cdkn2a-/-_C57 | SIN.LV.SF | VER - SPLEE | 4 | 102161331 | + | NM_019840    | Pde4b         | + |
| DMM85 | Cdkn2a-/-_C57 | SIN.LV.SF | LIVER       | 4 | 120154113 | - | NM_001159630 | Scmh1         | + |
| DMM87 | Cdkn2a-/-_C57 | SIN.LV.SF | SPLEEN      | 4 | 120759909 | - | NM_172700    | Zmpste24      | - |

|       |               |           |             |   |           |   |              |           |   |
|-------|---------------|-----------|-------------|---|-----------|---|--------------|-----------|---|
| DMM85 | Cdkn2a-/-_C57 | SIN.LV.SF | LIVER       | 4 | 123101579 | - | NM_009600    | Macf1     | - |
| DMM85 | Cdkn2a-/-_C57 | SIN.LV.SF | LIVER       | 4 | 126705131 | - | NM_023603    | Sfpq      | + |
| DMM86 | Cdkn2a-/-_C57 | SIN.LV.SF | SPLEEN      | 4 | 135897396 | - | NM_028871    | Hnrnp     | + |
| DMM85 | Cdkn2a-/-_C57 | SIN.LV.SF | LIVER       | 4 | 144599230 | + | NM_001128198 | Vps13d    | - |
| DMM86 | Cdkn2a-/-_C57 | SIN.LV.SF | LIVER       | 4 | 148665760 | - | NM_008441    | Kif1b     | - |
| DMM85 | Cdkn2a-/-_C57 | SIN.LV.SF | LIVER       | 4 | 149890348 | + | NM_001085492 | Rere      | + |
| DMM84 | Cdkn2a-/-_C57 | SIN.LV.SF | LIVER       | 4 | 151223186 | + | NM_001081557 | Camta1    | - |
| DMM87 | Cdkn2a-/-_C57 | SIN.LV.SF | VER - SPLEE | 5 | 3168965   | + | NM_134232    | LOC171266 | - |
| DMM85 | Cdkn2a-/-_C57 | SIN.LV.SF | LIVER       | 5 | 3716711   | + | NM_001003909 | Ankib1    | - |
| DMM85 | Cdkn2a-/-_C57 | SIN.LV.SF | LIVER       | 5 | 4849787   | - | NM_011074    | Pftk1     | - |
| DMM85 | Cdkn2a-/-_C57 | SIN.LV.SF | LIVER       | 5 | 5303163   | + | NM_011074    | Pftk1     | - |
| DMM80 | Cdkn2a-/-_C57 | SIN.LV.SF | LIVER       | 5 | 7958224   | - | NM_054098    | Steap4    | + |
| DMM85 | Cdkn2a-/-_C57 | SIN.LV.SF | VER - SPLEE | 5 | 13965185  | + | NM_011348    | Sema3e    | + |
| DMM86 | Cdkn2a-/-_C57 | SIN.LV.SF | LIVER       | 5 | 15552267  | + | NM_001110843 | Cacna2d1  | + |
| DMM85 | Cdkn2a-/-_C57 | SIN.LV.SF | LIVER       | 5 | 15928272  | + | NM_001110843 | Cacna2d1  | + |
| DMM84 | Cdkn2a-/-_C57 | SIN.LV.SF | SPLEEN      | 5 | 17325375  | - | NM_001159555 | Cd36      | - |
| DMM82 | Cdkn2a-/-_C57 | SIN.LV.SF | LIVER       | 5 | 17412240  | - | NM_001159558 | Cd36      | - |
| DMM85 | Cdkn2a-/-_C57 | SIN.LV.SF | LIVER       | 5 | 17526890  | - | NM_001081143 | Gnat3     | + |
| DMM85 | Cdkn2a-/-_C57 | SIN.LV.SF | LIVER       | 5 | 18901721  | + | NM_015823    | Magi2     | + |
| DMM84 | Cdkn2a-/-_C57 | SIN.LV.SF | LIVER       | 5 | 19175686  | + | NM_015823    | Magi2     | + |
| DMM86 | Cdkn2a-/-_C57 | SIN.LV.SF | LIVER       | 5 | 20528654  | + | NM_011203    | Ptpn12    | - |
| DMM85 | Cdkn2a-/-_C57 | SIN.LV.SF | LIVER       | 5 | 20550403  | - | NM_011203    | Ptpn12    | - |
| DMM80 | Cdkn2a-/-_C57 | SIN.LV.SF | LIVER       | 5 | 22934535  | - | NM_009274    | Srpk2     | - |
| DMM86 | Cdkn2a-/-_C57 | SIN.LV.SF | LIVER       | 5 | 23216343  | + | NM_178403    | Pus7      | - |
| DMM85 | Cdkn2a-/-_C57 | SIN.LV.SF | LIVER       | 5 | 24884840  | + | NM_001081383 | Mll3      | - |
| DMM85 | Cdkn2a-/-_C57 | SIN.LV.SF | LIVER       | 5 | 30275839  | + | NM_031168    | Il6       | + |
| DMM85 | Cdkn2a-/-_C57 | SIN.LV.SF | LIVER       | 5 | 40210885  | - | NM_010474    | Hs3st1    | - |
| DMM85 | Cdkn2a-/-_C57 | SIN.LV.SF | LIVER       | 5 | 42074295  | + | NM_027295    | Rab28     | - |
| DMM85 | Cdkn2a-/-_C57 | SIN.LV.SF | LIVER       | 5 | 43558324  | + | NM_175937    | Cpeb2     | + |
| DMM85 | Cdkn2a-/-_C57 | SIN.LV.SF | LIVER       | 5 | 43658558  | - | NM_175937    | Cpeb2     | + |
| DMM82 | Cdkn2a-/-_C57 | SIN.LV.SF | LIVER       | 5 | 44126290  | - | NM_172274    | Cc2d2a    | + |

|       |               |           |             |   |          |   |              |          |   |
|-------|---------------|-----------|-------------|---|----------|---|--------------|----------|---|
| DMM82 | Cdkn2a-/-_C57 | SIN.LV.SF | LIVER       | 5 | 44913190 | + | NM_001077398 | Ldb2     | - |
| DMM85 | Cdkn2a-/-_C57 | SIN.LV.SF | LIVER       | 5 | 45340989 | - | NM_001077398 | Ldb2     | - |
| DMM82 | Cdkn2a-/-_C57 | SIN.LV.SF | SPLEEN      | 5 | 45899611 | - | NM_024434    | Lap3     | + |
| DMM82 | Cdkn2a-/-_C57 | SIN.LV.SF | VER - SPLEE | 5 | 46094319 | + | NM_178142    | Lcorl    | - |
| DMM85 | Cdkn2a-/-_C57 | SIN.LV.SF | LIVER       | 5 | 46356752 | + | NM_178142    | Lcorl    | - |
| DMM85 | Cdkn2a-/-_C57 | SIN.LV.SF | LIVER       | 5 | 51968534 | - | NM_008904    | Ppargc1a | - |
| DMM86 | Cdkn2a-/-_C57 | SIN.LV.SF | LIVER       | 5 | 54499414 | + | NM_001081103 | Stim2    | + |
| DMM80 | Cdkn2a-/-_C57 | SIN.LV.SF | LIVER       | 5 | 54998877 | + | NM_001081103 | Stim2    | + |
| DMM82 | Cdkn2a-/-_C57 | SIN.LV.SF | LIVER       | 5 | 60166428 | - | NM_001122758 | Pcdh7    | + |
| DMM85 | Cdkn2a-/-_C57 | SIN.LV.SF | LIVER       | 5 | 60247379 | - | NM_001122758 | Pcdh7    | + |
| DMM80 | Cdkn2a-/-_C57 | SIN.LV.SF | LIVER       | 5 | 63179818 | + | NM_178407    | Arap2    | - |
| DMM85 | Cdkn2a-/-_C57 | SIN.LV.SF | LIVER       | 5 | 66011281 | + | NM_001081321 | Pds5a    | - |
| DMM85 | Cdkn2a-/-_C57 | SIN.LV.SF | LIVER       | 5 | 66442358 | - | NM_001127382 | Rbm47    | - |
| DMM85 | Cdkn2a-/-_C57 | SIN.LV.SF | LIVER       | 5 | 68299591 | + | NM_001038999 | Atp8a1   | - |
| DMM85 | Cdkn2a-/-_C57 | SIN.LV.SF | LIVER       | 5 | 69961106 | + | NM_172711    | Guf1     | + |
| DMM82 | Cdkn2a-/-_C57 | SIN.LV.SF | LIVER       | 5 | 76598000 | + | NM_020611    | Srd5a3   | + |
| DMM87 | Cdkn2a-/-_C57 | SIN.LV.SF | VER - SPLEE | 5 | 77372353 | + | NM_025939    | Paics    | + |
| DMM85 | Cdkn2a-/-_C57 | SIN.LV.SF | LIVER       | 5 | 81480997 | + | NM_198702    | Lphn3    | + |
| DMM85 | Cdkn2a-/-_C57 | SIN.LV.SF | VER - SPLEE | 5 | 81554166 | + | NM_198702    | Lphn3    | + |
| DMM86 | Cdkn2a-/-_C57 | SIN.LV.SF | LIVER       | 5 | 81676087 | + | NM_198702    | Lphn3    | + |
| DMM86 | Cdkn2a-/-_C57 | SIN.LV.SF | LIVER       | 5 | 81676261 | - | NM_198702    | Lphn3    | + |
| DMM85 | Cdkn2a-/-_C57 | SIN.LV.SF | LIVER       | 5 | 83436377 | + | NM_153801    | Srd5a2l2 | - |
| DMM82 | Cdkn2a-/-_C57 | SIN.LV.SF | LIVER       | 5 | 90769362 | - | NM_030886    | Ankrd17  | - |
| DMM85 | Cdkn2a-/-_C57 | SIN.LV.SF | LIVER       | 5 | 92488162 | - | NM_001080795 | G3bp2    | - |
| DMM87 | Cdkn2a-/-_C57 | SIN.LV.SF | LIVER       | 5 | 96514776 | - | NM_144910    | Cnot6l   | - |
| DMM85 | Cdkn2a-/-_C57 | SIN.LV.SF | LIVER       | 5 | 97473213 | + | NM_080708    | Bmp2k    | + |
| DMM87 | Cdkn2a-/-_C57 | SIN.LV.SF | VER - SPLEE | 5 | 99979812 | + | NM_145839    | Rasgef1b | - |
| DMM87 | Cdkn2a-/-_C57 | SIN.LV.SF | SPLEEN      | 5 | 99979857 | - | NM_145839    | Rasgef1b | - |
| DMM87 | Cdkn2a-/-_C57 | SIN.LV.SF | SPLEEN      | 5 | 99979863 | - | NM_145839    | Rasgef1b | - |
| DMM87 | Cdkn2a-/-_C57 | SIN.LV.SF | LIVER       | 5 | 99979923 | - | NM_145839    | Rasgef1b | - |
| DMM87 | Cdkn2a-/-_C57 | SIN.LV.SF | SPLEEN      | 5 | 99980063 | - | NM_145839    | Rasgef1b | - |

|       |               |           |              |   |           |   |              |               |   |
|-------|---------------|-----------|--------------|---|-----------|---|--------------|---------------|---|
| DMM86 | Cdkn2a-/-_C57 | SIN.LV.SF | LIVER        | 5 | 104945881 | - | NR_024083    | BC005561      | + |
| DMM85 | Cdkn2a-/-_C57 | SIN.LV.SF | LIVER        | 5 | 107046523 | + | NM_026856    | Zfp644        | - |
| DMM84 | Cdkn2a-/-_C57 | SIN.LV.SF | LIVER        | 5 | 107928031 | - | NM_182745    | 1700028K03Rik | + |
| DMM82 | Cdkn2a-/-_C57 | SIN.LV.SF | VER - SPLEEN | 5 | 108520348 | - | NM_013827    | Mtf2          | + |
| DMM85 | Cdkn2a-/-_C57 | SIN.LV.SF | LIVER        | 5 | 119172203 | - | NM_172424    | Med13l        | + |
| DMM80 | Cdkn2a-/-_C57 | SIN.LV.SF | SPLEEN       | 5 | 121010864 | + | NM_145853    | Tpcn1         | - |
| DMM84 | Cdkn2a-/-_C57 | SIN.LV.SF | LIVER        | 5 | 130807214 | - | NM_001015876 | Tyw1          | + |
| DMM84 | Cdkn2a-/-_C57 | SIN.LV.SF | SPLEEN       | 5 | 139714153 | + | NM_024451    | Unc84a        | + |
| DMM85 | Cdkn2a-/-_C57 | SIN.LV.SF | LIVER        | 5 | 141398669 | + | NM_175362    | Card11        | - |
| DMM85 | Cdkn2a-/-_C57 | SIN.LV.SF | LIVER        | 5 | 143870239 | - | NM_080561    | Rnf216        | - |
| DMM87 | Cdkn2a-/-_C57 | SIN.LV.SF | SPLEEN       | 5 | 147106963 | - | NM_153599    | Cdk8          | + |
| DMM86 | Cdkn2a-/-_C57 | SIN.LV.SF | VER - SPLEEN | 5 | 149982434 | + | NM_001013378 | Usp1l         | + |
| DMM87 | Cdkn2a-/-_C57 | SIN.LV.SF | SPLEEN       | 5 | 151158691 | - | NR_024513    | Gm5           | - |
| DMM85 | Cdkn2a-/-_C57 | SIN.LV.SF | LIVER        | 6 | 3505203   | + | NM_024260    | Ccdc132       | + |
| DMM85 | Cdkn2a-/-_C57 | SIN.LV.SF | LIVER        | 6 | 3517073   | + | NM_024260    | Ccdc132       | + |
| DMM85 | Cdkn2a-/-_C57 | SIN.LV.SF | LIVER        | 6 | 5457185   | + | NM_013743    | Pdk4          | - |
| DMM85 | Cdkn2a-/-_C57 | SIN.LV.SF | LIVER        | 6 | 6056384   | - | NM_015829    | Slc25a13      | - |
| DMM85 | Cdkn2a-/-_C57 | SIN.LV.SF | LIVER        | 6 | 6197069   | + | NM_015829    | Slc25a13      | - |
| DMM85 | Cdkn2a-/-_C57 | SIN.LV.SF | LIVER        | 6 | 7808317   | + | NM_052993    | C1galt1       | + |
| DMM85 | Cdkn2a-/-_C57 | SIN.LV.SF | LIVER        | 6 | 12023234  | - | NR_003631    | Gm6578        | - |
| DMM85 | Cdkn2a-/-_C57 | SIN.LV.SF | LIVER        | 6 | 17454313  | - | NM_008591    | Met           | + |
| DMM85 | Cdkn2a-/-_C57 | SIN.LV.SF | LIVER        | 6 | 24601216  | - | NM_028459    | Wasl          | - |
| DMM85 | Cdkn2a-/-_C57 | SIN.LV.SF | LIVER        | 6 | 24750121  | - | NM_001079875 | Spam1         | + |
| DMM85 | Cdkn2a-/-_C57 | SIN.LV.SF | LIVER        | 6 | 24790907  | - | NM_028957    | Hyal5         | + |
| DMM85 | Cdkn2a-/-_C57 | SIN.LV.SF | LIVER        | 6 | 25672016  | - | NM_133931    | Pot1a         | - |
| DMM82 | Cdkn2a-/-_C57 | SIN.LV.SF | LIVER        | 6 | 26161488  | + | NM_133931    | Pot1a         | - |
| DMM85 | Cdkn2a-/-_C57 | SIN.LV.SF | LIVER        | 6 | 26356921  | - | NM_133931    | Pot1a         | - |
| DMM85 | Cdkn2a-/-_C57 | SIN.LV.SF | LIVER        | 6 | 30056882  | + | NM_010938    | Nrf1          | + |
| DMM84 | Cdkn2a-/-_C57 | SIN.LV.SF | LIVER        | 6 | 31408154  | + | NM_013791    | Mkln1         | + |
| DMM85 | Cdkn2a-/-_C57 | SIN.LV.SF | LIVER        | 6 | 35017562  | + | NM_016877    | Cnot4         | - |
| DMM85 | Cdkn2a-/-_C57 | SIN.LV.SF | LIVER        | 6 | 37009057  | + | NM_001081206 | Dgki          | - |

|       |               |           |              |   |          |   |              |         |   |
|-------|---------------|-----------|--------------|---|----------|---|--------------|---------|---|
| DMM85 | Cdkn2a-/-_C57 | SIN.LV.SF | LIVER        | 6 | 37714266 | + | NM_145076    | Trim24  | + |
| DMM87 | Cdkn2a-/-_C57 | SIN.LV.SF | LIVER        | 6 | 39144185 | - | NM_001033430 | Jhdm1d  | - |
| DMM84 | Cdkn2a-/-_C57 | SIN.LV.SF | LIVER        | 6 | 39594404 | - | NM_139294    | Braf    | - |
| DMM86 | Cdkn2a-/-_C57 | SIN.LV.SF | SPLEEN       | 6 | 39594435 | + | NM_139294    | Braf    | - |
| DMM85 | Cdkn2a-/-_C57 | SIN.LV.SF | LIVER        | 6 | 39594462 | - | NM_139294    | Braf    | - |
| DMM85 | Cdkn2a-/-_C57 | SIN.LV.SF | LIVER        | 6 | 39594475 | - | NM_139294    | Braf    | - |
| DMM86 | Cdkn2a-/-_C57 | SIN.LV.SF | SPLEEN       | 6 | 39594481 | + | NM_139294    | Braf    | - |
| DMM80 | Cdkn2a-/-_C57 | SIN.LV.SF | LIVER        | 6 | 39594531 | - | NM_139294    | Braf    | - |
| DMM86 | Cdkn2a-/-_C57 | SIN.LV.SF | VER - SPLEEN | 6 | 39594560 | - | NM_139294    | Braf    | - |
| DMM87 | Cdkn2a-/-_C57 | SIN.LV.SF | SPLEEN       | 6 | 39594648 | + | NM_139294    | Braf    | - |
| DMM84 | Cdkn2a-/-_C57 | SIN.LV.SF | LIVER        | 6 | 39594738 | - | NM_139294    | Braf    | - |
| DMM85 | Cdkn2a-/-_C57 | SIN.LV.SF | VER - SPLEEN | 6 | 39594742 | - | NM_139294    | Braf    | - |
| DMM85 | Cdkn2a-/-_C57 | SIN.LV.SF | VER - SPLEEN | 6 | 39594779 | - | NM_139294    | Braf    | - |
| DMM87 | Cdkn2a-/-_C57 | SIN.LV.SF | SPLEEN       | 6 | 39594865 | - | NM_139294    | Braf    | - |
| DMM87 | Cdkn2a-/-_C57 | SIN.LV.SF | VER - SPLEEN | 6 | 39594885 | - | NM_139294    | Braf    | - |
| DMM84 | Cdkn2a-/-_C57 | SIN.LV.SF | LIVER        | 6 | 39595016 | - | NM_139294    | Braf    | - |
| DMM84 | Cdkn2a-/-_C57 | SIN.LV.SF | VER - SPLEEN | 6 | 39595025 | - | NM_139294    | Braf    | - |
| DMM86 | Cdkn2a-/-_C57 | SIN.LV.SF | LIVER        | 6 | 39595044 | - | NM_139294    | Braf    | - |
| DMM85 | Cdkn2a-/-_C57 | SIN.LV.SF | VER - SPLEEN | 6 | 39595134 | - | NM_139294    | Braf    | - |
| DMM82 | Cdkn2a-/-_C57 | SIN.LV.SF | VER - SPLEEN | 6 | 39595166 | - | NM_139294    | Braf    | - |
| DMM86 | Cdkn2a-/-_C57 | SIN.LV.SF | LIVER        | 6 | 39595186 | - | NM_139294    | Braf    | - |
| DMM87 | Cdkn2a-/-_C57 | SIN.LV.SF | LIVER        | 6 | 39595294 | - | NM_139294    | Braf    | - |
| DMM84 | Cdkn2a-/-_C57 | SIN.LV.SF | LIVER        | 6 | 39595348 | - | NM_139294    | Braf    | - |
| DMM82 | Cdkn2a-/-_C57 | SIN.LV.SF | LIVER        | 6 | 39595358 | - | NM_139294    | Braf    | - |
| DMM82 | Cdkn2a-/-_C57 | SIN.LV.SF | LIVER        | 6 | 39595377 | - | NM_139294    | Braf    | - |
| DMM82 | Cdkn2a-/-_C57 | SIN.LV.SF | LIVER        | 6 | 39595400 | - | NM_139294    | Braf    | - |
| DMM85 | Cdkn2a-/-_C57 | SIN.LV.SF | LIVER        | 6 | 39595991 | - | NM_139294    | Braf    | - |
| DMM82 | Cdkn2a-/-_C57 | SIN.LV.SF | LIVER        | 6 | 39597459 | - | NM_139294    | Braf    | - |
| DMM85 | Cdkn2a-/-_C57 | SIN.LV.SF | LIVER        | 6 | 40296709 | + | NM_023538    | Agk     | + |
| DMM85 | Cdkn2a-/-_C57 | SIN.LV.SF | LIVER        | 6 | 43404186 | - | NM_013861    | Tpk1    | - |
| DMM86 | Cdkn2a-/-_C57 | SIN.LV.SF | LIVER        | 6 | 46410013 | + | NM_001004357 | Cntnap2 | + |

|       |               |           |              |   |           |   |              |               |   |
|-------|---------------|-----------|--------------|---|-----------|---|--------------|---------------|---|
| DMM82 | Cdkn2a-/-_C57 | SIN.LV.SF | LIVER        | 6 | 53551399  | - | NM_172728    | Creb5         | + |
| DMM82 | Cdkn2a-/-_C57 | SIN.LV.SF | LIVER        | 6 | 54780359  | + | NM_199143    | Znrf2         | + |
| DMM86 | Cdkn2a-/-_C57 | SIN.LV.SF | LIVER        | 6 | 56264791  | + | NM_001025568 | Pde1c         | - |
| DMM85 | Cdkn2a-/-_C57 | SIN.LV.SF | LIVER        | 6 | 56681742  | + | NM_030235    | Avl9          | + |
| DMM87 | Cdkn2a-/-_C57 | SIN.LV.SF | LIVER        | 6 | 57601320  | + | NM_025574    | Pigy          | - |
| DMM82 | Cdkn2a-/-_C57 | SIN.LV.SF | LIVER        | 6 | 61685716  | - | NM_009221    | Snca          | - |
| DMM85 | Cdkn2a-/-_C57 | SIN.LV.SF | LIVER        | 6 | 66864304  | - | NM_025278    | Gng12         | + |
| DMM85 | Cdkn2a-/-_C57 | SIN.LV.SF | LIVER        | 6 | 72433524  | + | NM_145569    | Mat2a         | - |
| DMM84 | Cdkn2a-/-_C57 | SIN.LV.SF | VER - SPLEEN | 6 | 85577963  | - | NM_145223    | Alms1         | + |
| DMM85 | Cdkn2a-/-_C57 | SIN.LV.SF | LIVER        | 6 | 86215990  | + | NM_031199    | Tgfa          | + |
| DMM84 | Cdkn2a-/-_C57 | SIN.LV.SF | LIVER        | 6 | 97275390  | - | NM_145148    | Frmd4b        | - |
| DMM86 | Cdkn2a-/-_C57 | SIN.LV.SF | LIVER        | 6 | 100811784 | + | NM_182939    | Ppp4r2        | + |
| DMM85 | Cdkn2a-/-_C57 | SIN.LV.SF | LIVER        | 6 | 101501932 | - | NM_018884    | Pdzrn3        | - |
| DMM85 | Cdkn2a-/-_C57 | SIN.LV.SF | LIVER        | 6 | 106746506 | + | NM_021449    | Crbn          | - |
| DMM87 | Cdkn2a-/-_C57 | SIN.LV.SF | SPLEEN       | 6 | 119778518 | + | NM_053204    | Erc1          | - |
| DMM87 | Cdkn2a-/-_C57 | SIN.LV.SF | LIVER        | 6 | 119779675 | + | NM_053204    | Erc1          | - |
| DMM87 | Cdkn2a-/-_C57 | SIN.LV.SF | SPLEEN       | 6 | 119779689 | + | NM_053204    | Erc1          | - |
| DMM87 | Cdkn2a-/-_C57 | SIN.LV.SF | VER - SPLEEN | 6 | 119779729 | - | NM_053204    | Erc1          | - |
| DMM85 | Cdkn2a-/-_C57 | SIN.LV.SF | LIVER        | 6 | 119896496 | - | NM_198703    | Wnk1          | - |
| DMM86 | Cdkn2a-/-_C57 | SIN.LV.SF | LIVER        | 6 | 123070359 | + | NM_011999    | Clec4a2       | + |
| DMM85 | Cdkn2a-/-_C57 | SIN.LV.SF | LIVER        | 6 | 129376924 | - | NM_175526    | Clec1a        | - |
| DMM85 | Cdkn2a-/-_C57 | SIN.LV.SF | LIVER        | 6 | 134643866 | + | NM_026371    | Loh12cr1      | + |
| DMM85 | Cdkn2a-/-_C57 | SIN.LV.SF | LIVER        | 6 | 135449773 | + | NM_010128    | Emp1          | + |
| DMM84 | Cdkn2a-/-_C57 | SIN.LV.SF | LIVER        | 6 | 136527969 | - | NM_019426    | Atf7ip        | + |
| DMM82 | Cdkn2a-/-_C57 | SIN.LV.SF | LIVER        | 6 | 141695961 | + | NM_030687    | Slco1a4       | - |
| DMM85 | Cdkn2a-/-_C57 | SIN.LV.SF | LIVER        | 6 | 149276031 | + | NM_026054    | 2810474O19Rik | + |
| DMM85 | Cdkn2a-/-_C57 | SIN.LV.SF | LIVER        | 7 | 7238692   | - | NM_011334    | Clcn4-2       | - |
| DMM82 | Cdkn2a-/-_C57 | SIN.LV.SF | SPLEEN       | 7 | 13392410  | - | NM_026046    | Zfp329        | - |
| DMM85 | Cdkn2a-/-_C57 | SIN.LV.SF | LIVER        | 7 | 17099468  | - | NM_172739    | Grfl1         | - |
| DMM85 | Cdkn2a-/-_C57 | SIN.LV.SF | LIVER        | 7 | 19841865  | - | NM_009499    | Vasp          | - |
| DMM85 | Cdkn2a-/-_C57 | SIN.LV.SF | LIVER        | 7 | 26528797  | - | NM_178089    | Hnrnpul1      | - |

|       |               |           |                |   |           |   |              |           |   |
|-------|---------------|-----------|----------------|---|-----------|---|--------------|-----------|---|
| DMM86 | Cdkn2a-/-_C57 | SIN.LV.SF | LIVER          | 7 | 37808752  | + | NM_172298    | Tshz3     | + |
| DMM85 | Cdkn2a-/-_C57 | SIN.LV.SF | LIVER          | 7 | 50633122  | + | NM_145581    | Siglec5   | + |
| DMM85 | Cdkn2a-/-_C57 | SIN.LV.SF | LIVER          | 7 | 53707543  | - | NM_013789    | Sergef    | - |
| DMM85 | Cdkn2a-/-_C57 | SIN.LV.SF | LIVER          | 7 | 66481715  | - | NM_173010    | Ube3a     | + |
| DMM85 | Cdkn2a-/-_C57 | SIN.LV.SF | LIVER          | 7 | 71080413  | - | NM_021366    | Klf13     | - |
| DMM80 | Cdkn2a-/-_C57 | SIN.LV.SF | LIVER          | 7 | 71530333  | - | NM_026483    | Mphosph10 | - |
| DMM85 | Cdkn2a-/-_C57 | SIN.LV.SF | LIVER          | 7 | 74408485  | + | NM_001033713 | Mef2a     | - |
| DMM80 | Cdkn2a-/-_C57 | SIN.LV.SF | LIVER          | 7 | 75443589  | - | NM_001013811 | Fam169b   | + |
| DMM80 | Cdkn2a-/-_C57 | SIN.LV.SF | LIVER          | 7 | 80692025  | + | NM_001081345 | Chd2      | - |
| DMM85 | Cdkn2a-/-_C57 | SIN.LV.SF | LIVER          | 7 | 87989201  | + | NM_009553    | Zscan2    | + |
| DMM82 | Cdkn2a-/-_C57 | SIN.LV.SF | LIVER          | 7 | 91795254  | - | NM_022985    | Zfand6    | - |
| DMM82 | Cdkn2a-/-_C57 | SIN.LV.SF | LIVER - SPLEEN | 7 | 91833838  | + | NM_022985    | Zfand6    | - |
| DMM86 | Cdkn2a-/-_C57 | SIN.LV.SF | LIVER          | 7 | 94028907  | + | NM_001105189 | Vmn2r78   | + |
| DMM86 | Cdkn2a-/-_C57 | SIN.LV.SF | LIVER          | 7 | 95268423  | + | NM_001081414 | Grm5      | + |
| DMM82 | Cdkn2a-/-_C57 | SIN.LV.SF | LIVER          | 7 | 95291098  | - | NM_001081414 | Grm5      | + |
| DMM86 | Cdkn2a-/-_C57 | SIN.LV.SF | LIVER          | 7 | 95588284  | + | NM_028238    | Rab38     | + |
| DMM85 | Cdkn2a-/-_C57 | SIN.LV.SF | LIVER          | 7 | 95608057  | - | NM_028238    | Rab38     | + |
| DMM86 | Cdkn2a-/-_C57 | SIN.LV.SF | LIVER          | 7 | 96344899  | + | NM_028343    | Tmem135   | - |
| DMM85 | Cdkn2a-/-_C57 | SIN.LV.SF | LIVER          | 7 | 96369675  | - | NM_028343    | Tmem135   | - |
| DMM85 | Cdkn2a-/-_C57 | SIN.LV.SF | LIVER          | 7 | 96372178  | - | NM_028343    | Tmem135   | - |
| DMM85 | Cdkn2a-/-_C57 | SIN.LV.SF | LIVER          | 7 | 97291368  | - | NM_146194    | Picalm    | + |
| DMM85 | Cdkn2a-/-_C57 | SIN.LV.SF | LIVER          | 7 | 98040151  | - | NM_011807    | Dlg2      | + |
| DMM85 | Cdkn2a-/-_C57 | SIN.LV.SF | LIVER          | 7 | 99613783  | - | NM_011807    | Dlg2      | + |
| DMM85 | Cdkn2a-/-_C57 | SIN.LV.SF | LIVER          | 7 | 99728201  | + | NM_025515    | Ccdc90b   | + |
| DMM86 | Cdkn2a-/-_C57 | SIN.LV.SF | LIVER          | 7 | 100756670 | - | NM_021427    | Fam181b   | + |
| DMM86 | Cdkn2a-/-_C57 | SIN.LV.SF | LIVER          | 7 | 104254504 | + | NM_010248    | Gab2      | + |
| DMM85 | Cdkn2a-/-_C57 | SIN.LV.SF | LIVER          | 7 | 109790803 | - | NM_146325    | Olfir554  | + |
| DMM86 | Cdkn2a-/-_C57 | SIN.LV.SF | LIVER          | 7 | 114747321 | + | NM_008905    | Ppfbp2    | + |
| DMM87 | Cdkn2a-/-_C57 | SIN.LV.SF | LIVER          | 7 | 114793180 | + | NM_008905    | Ppfbp2    | + |
| DMM85 | Cdkn2a-/-_C57 | SIN.LV.SF | LIVER          | 7 | 120377575 | - | NM_007489    | Arntl     | + |
| DMM85 | Cdkn2a-/-_C57 | SIN.LV.SF | LIVER          | 7 | 120618286 | + | NM_026143    | Far1      | + |

|       |               |           |              |   |           |   |              |               |   |
|-------|---------------|-----------|--------------|---|-----------|---|--------------|---------------|---|
| DMM86 | Cdkn2a-/-_C57 | SIN.LV.SF | LIVER        | 7 | 122114056 | + | NM_173767    | Insc          | + |
| DMM85 | Cdkn2a-/-_C57 | SIN.LV.SF | LIVER        | 7 | 123243583 | - | NM_019772    | 1110004F10Rik | + |
| DMM82 | Cdkn2a-/-_C57 | SIN.LV.SF | VER - SPLEEN | 7 | 125967182 | + | NM_027815    | 9030624J02Rik | + |
| DMM85 | Cdkn2a-/-_C57 | SIN.LV.SF | LIVER        | 7 | 126948519 | - | NM_001004187 | 2610020H08Rik | + |
| DMM85 | Cdkn2a-/-_C57 | SIN.LV.SF | LIVER        | 7 | 138021389 | - | NM_133942    | Plekha1       | + |
| DMM87 | Cdkn2a-/-_C57 | SIN.LV.SF | LIVER        | 7 | 140006986 | + | NM_212473    | Fam53b        | - |
| DMM87 | Cdkn2a-/-_C57 | SIN.LV.SF | VER - SPLEEN | 7 | 140008146 | - | NM_212473    | Fam53b        | - |
| DMM80 | Cdkn2a-/-_C57 | SIN.LV.SF | VER - SPLEEN | 7 | 143019126 | + | NM_001081117 | Mki67         | - |
| DMM80 | Cdkn2a-/-_C57 | SIN.LV.SF | LIVER        | 7 | 143019213 | - | NM_001081117 | Mki67         | - |
| DMM80 | Cdkn2a-/-_C57 | SIN.LV.SF | LIVER        | 7 | 143019282 | - | NM_001081117 | Mki67         | - |
| DMM80 | Cdkn2a-/-_C57 | SIN.LV.SF | SPLEEN       | 7 | 143019315 | - | NM_001081117 | Mki67         | - |
| DMM86 | Cdkn2a-/-_C57 | SIN.LV.SF | LIVER        | 7 | 143505992 | + | NM_008598    | Mgmt          | + |
| DMM86 | Cdkn2a-/-_C57 | SIN.LV.SF | LIVER        | 7 | 144634056 | - | NM_023140    | Glr3          | + |
| DMM82 | Cdkn2a-/-_C57 | SIN.LV.SF | LIVER        | 7 | 146086761 | - | NM_009760    | Bnip3         | - |
| DMM80 | Cdkn2a-/-_C57 | SIN.LV.SF | LIVER        | 7 | 146747378 | + | NM_001127363 | Inpp5a        | + |
| DMM85 | Cdkn2a-/-_C57 | SIN.LV.SF | LIVER        | 7 | 147919981 | + | NM_146962    | Olf1541       | + |
| DMM87 | Cdkn2a-/-_C57 | SIN.LV.SF | SPLEEN       | 8 | 3207789   | + | NM_010568    | Insr          | - |
| DMM85 | Cdkn2a-/-_C57 | SIN.LV.SF | VER - SPLEEN | 8 | 6119888   | + | NM_011388    | Slc10a2       | - |
| DMM85 | Cdkn2a-/-_C57 | SIN.LV.SF | LIVER        | 8 | 6134608   | + | NM_011388    | Slc10a2       | - |
| DMM85 | Cdkn2a-/-_C57 | SIN.LV.SF | LIVER        | 8 | 8352853   | + | NM_010111    | Efnb2         | - |
| DMM86 | Cdkn2a-/-_C57 | SIN.LV.SF | LIVER        | 8 | 8680697   | + | NM_176849    | Arglu1        | - |
| DMM85 | Cdkn2a-/-_C57 | SIN.LV.SF | LIVER        | 8 | 13633581  | - | NM_009025    | Rasa3         | - |
| DMM85 | Cdkn2a-/-_C57 | SIN.LV.SF | LIVER        | 8 | 23949878  | + | NM_001081149 | Myst3         | + |
| DMM85 | Cdkn2a-/-_C57 | SIN.LV.SF | LIVER        | 8 | 27180121  | + | NM_207659    | Hook3         | - |
| DMM85 | Cdkn2a-/-_C57 | SIN.LV.SF | LIVER        | 8 | 27210677  | + | NM_207659    | Hook3         | - |
| DMM82 | Cdkn2a-/-_C57 | SIN.LV.SF | SPLEEN       | 8 | 27239792  | - | NM_029965    | Rnf170        | + |
| DMM82 | Cdkn2a-/-_C57 | SIN.LV.SF | SPLEEN       | 8 | 27239823  | - | NM_029965    | Rnf170        | + |
| DMM82 | Cdkn2a-/-_C57 | SIN.LV.SF | VER - SPLEEN | 8 | 36449324  | + | NM_177741    | Ppp1r3b       | + |
| DMM85 | Cdkn2a-/-_C57 | SIN.LV.SF | LIVER        | 8 | 40710228  | - | NM_001113326 | Msr1          | - |
| DMM85 | Cdkn2a-/-_C57 | SIN.LV.SF | LIVER        | 8 | 41445035  | - | NM_178395    | Zdhc2         | + |
| DMM82 | Cdkn2a-/-_C57 | SIN.LV.SF | SPLEEN       | 8 | 42121240  | + | NM_001005865 | Mtus1         | - |



|       |               |           |             |   |           |   |              |               |   |
|-------|---------------|-----------|-------------|---|-----------|---|--------------|---------------|---|
| DMM85 | Cdkn2a-/-_C57 | SIN.LV.SF | LIVER       | 8 | 42471737  | + | NM_013522    | Frg1          | - |
| DMM82 | Cdkn2a-/-_C57 | SIN.LV.SF | LIVER       | 8 | 46415477  | - | NM_133969    | Cyp4v3        | - |
| DMM85 | Cdkn2a-/-_C57 | SIN.LV.SF | LIVER       | 8 | 47081639  | - | NM_138668    | Ufsp2         | + |
| DMM85 | Cdkn2a-/-_C57 | SIN.LV.SF | LIVER       | 8 | 47421444  | - | NM_173789    | Helt          | - |
| DMM85 | Cdkn2a-/-_C57 | SIN.LV.SF | LIVER       | 8 | 48975871  | + | NM_133791    | Wwc2          | - |
| DMM87 | Cdkn2a-/-_C57 | SIN.LV.SF | SPLEEN      | 8 | 51847359  | - | NM_001145937 | Odz3          | - |
| DMM85 | Cdkn2a-/-_C57 | SIN.LV.SF | LIVER       | 8 | 51848260  | - | NM_001145937 | Odz3          | - |
| DMM85 | Cdkn2a-/-_C57 | SIN.LV.SF | LIVER       | 8 | 54570903  | - | NM_001005847 | Aga           | + |
| DMM85 | Cdkn2a-/-_C57 | SIN.LV.SF | LIVER       | 8 | 58684411  | - | NM_080438    | Glra3         | + |
| DMM85 | Cdkn2a-/-_C57 | SIN.LV.SF | LIVER       | 8 | 58864755  | - | NM_008278    | Hpgd          | + |
| DMM85 | Cdkn2a-/-_C57 | SIN.LV.SF | LIVER       | 8 | 58868636  | + | NM_008278    | Hpgd          | + |
| DMM86 | Cdkn2a-/-_C57 | SIN.LV.SF | LIVER       | 8 | 58872983  | + | NM_008278    | Hpgd          | + |
| DMM85 | Cdkn2a-/-_C57 | SIN.LV.SF | LIVER       | 8 | 58883179  | + | NM_008278    | Hpgd          | + |
| DMM85 | Cdkn2a-/-_C57 | SIN.LV.SF | LIVER       | 8 | 60060367  | - | NM_144731    | Galnt7        | - |
| DMM85 | Cdkn2a-/-_C57 | SIN.LV.SF | LIVER       | 8 | 60692901  | + | NM_175032    | 4930431L04Rik | - |
| DMM82 | Cdkn2a-/-_C57 | SIN.LV.SF | LIVER       | 8 | 63376273  | + | NM_028299    | 2700029M09Rik | + |
| DMM85 | Cdkn2a-/-_C57 | SIN.LV.SF | LIVER       | 8 | 63603321  | + | NM_175089    | Nek1          | + |
| DMM85 | Cdkn2a-/-_C57 | SIN.LV.SF | LIVER       | 8 | 63835238  | - | NM_021506    | Sh3rf1        | + |
| DMM85 | Cdkn2a-/-_C57 | SIN.LV.SF | LIVER       | 8 | 68890818  | - | NM_175188    | 1-Mar         | + |
| DMM85 | Cdkn2a-/-_C57 | SIN.LV.SF | LIVER       | 8 | 68995750  | + | NM_175188    | 1-Mar         | + |
| DMM85 | Cdkn2a-/-_C57 | SIN.LV.SF | LIVER       | 8 | 70385501  | + | NM_030263    | Psd3          | - |
| DMM85 | Cdkn2a-/-_C57 | SIN.LV.SF | LIVER       | 8 | 79845657  | - | NM_030113    | Arhgap10      | - |
| DMM84 | Cdkn2a-/-_C57 | SIN.LV.SF | LIVER       | 8 | 88353282  | - | NM_028007    | Itfg1         | - |
| DMM85 | Cdkn2a-/-_C57 | SIN.LV.SF | LIVER       | 8 | 93971480  | + | NM_011936    | Fto           | + |
| DMM85 | Cdkn2a-/-_C57 | SIN.LV.SF | LIVER       | 8 | 97150607  | + | NM_026274    | Rspry1        | + |
| DMM85 | Cdkn2a-/-_C57 | SIN.LV.SF | LIVER       | 8 | 97858703  | - | NM_133954    | AA960436      | + |
| DMM86 | Cdkn2a-/-_C57 | SIN.LV.SF | LIVER       | 8 | 103876634 | + | NM_009866    | Cdh11         | - |
| DMM82 | Cdkn2a-/-_C57 | SIN.LV.SF | VER - SPLEE | 8 | 105601861 | - | NM_009866    | Cdh11         | - |
| DMM82 | Cdkn2a-/-_C57 | SIN.LV.SF | VER - SPLEE | 8 | 106449251 | - | NM_009868    | Cdh5          | + |
| DMM85 | Cdkn2a-/-_C57 | SIN.LV.SF | LIVER       | 8 | 106914018 | - | NM_153582    | Cmtm4         | - |
| DMM86 | Cdkn2a-/-_C57 | SIN.LV.SF | LIVER       | 8 | 108701948 | - | NM_178798    | Slc7a6        | + |

|       |               |           |              |   |           |   |              |               |   |
|-------|---------------|-----------|--------------|---|-----------|---|--------------|---------------|---|
| DMM85 | Cdkn2a-/-_C57 | SIN.LV.SF | LIVER        | 8 | 110106806 | + | NM_010817    | Psmc7         | - |
| DMM85 | Cdkn2a-/-_C57 | SIN.LV.SF | LIVER        | 8 | 117127487 | - | NM_019573    | Wwox          | + |
| DMM86 | Cdkn2a-/-_C57 | SIN.LV.SF | LIVER        | 8 | 119254732 | + | NM_029441    | Cdyl2         | - |
| DMM85 | Cdkn2a-/-_C57 | SIN.LV.SF | LIVER        | 8 | 130969839 | + | NM_008737    | Nrp1          | + |
| DMM85 | Cdkn2a-/-_C57 | SIN.LV.SF | LIVER        | 8 | 131007393 | - | NM_008737    | Nrp1          | + |
| DMM84 | Cdkn2a-/-_C57 | SIN.LV.SF | LIVER        | 9 | 3004837   | - | NM_026303    | Alkbh8        | + |
| DMM86 | Cdkn2a-/-_C57 | SIN.LV.SF | VER - SPLEEN | 9 | 3026487   | + | NM_026303    | Alkbh8        | + |
| DMM85 | Cdkn2a-/-_C57 | SIN.LV.SF | VER - SPLEEN | 9 | 3350493   | - | NM_026303    | Alkbh8        | + |
| DMM85 | Cdkn2a-/-_C57 | SIN.LV.SF | LIVER        | 9 | 4386522   | - | NM_145609    | 8430410K20Rik | + |
| DMM85 | Cdkn2a-/-_C57 | SIN.LV.SF | LIVER        | 9 | 5354500   | - | NM_009808    | Casp12        | + |
| DMM85 | Cdkn2a-/-_C57 | SIN.LV.SF | SPLEEN       | 9 | 5830559   | + | NM_027924    | Pdgfd         | + |
| DMM85 | Cdkn2a-/-_C57 | SIN.LV.SF | SPLEEN       | 9 | 5830578   | + | NM_027924    | Pdgfd         | + |
| DMM85 | Cdkn2a-/-_C57 | SIN.LV.SF | SPLEEN       | 9 | 5830663   | + | NM_027924    | Pdgfd         | + |
| DMM85 | Cdkn2a-/-_C57 | SIN.LV.SF | VER - SPLEEN | 9 | 5830765   | - | NM_027924    | Pdgfd         | + |
| DMM82 | Cdkn2a-/-_C57 | SIN.LV.SF | VER - SPLEEN | 9 | 7008638   | - | NM_029851    | Dync2h1       | - |
| DMM85 | Cdkn2a-/-_C57 | SIN.LV.SF | LIVER        | 9 | 10562302  | - | NM_001033359 | Cntn5         | - |
| DMM82 | Cdkn2a-/-_C57 | SIN.LV.SF | VER - SPLEEN | 9 | 13588870  | - | NM_023858    | Mtmr2         | + |
| DMM85 | Cdkn2a-/-_C57 | SIN.LV.SF | LIVER        | 9 | 20301267  | - | NM_001082485 | 5730601F06Rik | - |
| DMM85 | Cdkn2a-/-_C57 | SIN.LV.SF | LIVER        | 9 | 22328201  | - | NM_178415    | Bbs9          | + |
| DMM82 | Cdkn2a-/-_C57 | SIN.LV.SF | SPLEEN       | 9 | 25048872  | - | NM_009859    | 7-Sep         | + |
| DMM82 | Cdkn2a-/-_C57 | SIN.LV.SF | LIVER        | 9 | 25100597  | + | NM_009859    | 7-Sep         | + |
| DMM85 | Cdkn2a-/-_C57 | SIN.LV.SF | LIVER        | 9 | 35041464  | + | NM_194257    | Fam118b       | - |
| DMM87 | Cdkn2a-/-_C57 | SIN.LV.SF | VER - SPLEEN | 9 | 35241849  | + | NM_021339    | Cdon          | + |
| DMM87 | Cdkn2a-/-_C57 | SIN.LV.SF | LIVER        | 9 | 35241942  | - | NM_021339    | Cdon          | + |
| DMM85 | Cdkn2a-/-_C57 | SIN.LV.SF | LIVER        | 9 | 40866427  | - | NM_176860    | Ubash3b       | - |
| DMM85 | Cdkn2a-/-_C57 | SIN.LV.SF | VER - SPLEEN | 9 | 52930279  | - | NM_029936    | Ddx10         | - |
| DMM87 | Cdkn2a-/-_C57 | SIN.LV.SF | SPLEEN       | 9 | 52997503  | - | NM_029936    | Ddx10         | - |
| DMM85 | Cdkn2a-/-_C57 | SIN.LV.SF | LIVER        | 9 | 54333486  | + | NM_172771    | Dmxl2         | - |
| DMM85 | Cdkn2a-/-_C57 | SIN.LV.SF | LIVER        | 9 | 55021830  | + | NM_180600    | Ube2q2        | + |
| DMM82 | Cdkn2a-/-_C57 | SIN.LV.SF | LIVER        | 9 | 56969660  | + | NM_001110350 | Sin3a         | + |
| DMM85 | Cdkn2a-/-_C57 | SIN.LV.SF | LIVER        | 9 | 71758015  | - | NM_011544    | Tcf12         | - |

|       |               |           |              |    |           |   |              |               |   |
|-------|---------------|-----------|--------------|----|-----------|---|--------------|---------------|---|
| DMM85 | Cdkn2a-/-_C57 | SIN.LV.SF | LIVER        | 9  | 78333911  | + | NM_010106    | Eef1a1        | - |
| DMM85 | Cdkn2a-/-_C57 | SIN.LV.SF | LIVER        | 9  | 79940719  | - | NM_146003    | Senp6         | + |
| DMM85 | Cdkn2a-/-_C57 | SIN.LV.SF | LIVER        | 9  | 82783382  | + | NM_001081216 | Phip          | - |
| DMM85 | Cdkn2a-/-_C57 | SIN.LV.SF | LIVER        | 9  | 82842481  | + | NM_001081216 | Phip          | - |
| DMM85 | Cdkn2a-/-_C57 | SIN.LV.SF | LIVER        | 9  | 83911185  | + | NM_199195    | Bckdhh        | + |
| DMM82 | Cdkn2a-/-_C57 | SIN.LV.SF | LIVER        | 9  | 85363203  | + | NM_001160379 | Fam46a        | - |
| DMM84 | Cdkn2a-/-_C57 | SIN.LV.SF | SPLEEN       | 9  | 85581698  | - | NM_001081282 | Ibtk          | - |
| DMM82 | Cdkn2a-/-_C57 | SIN.LV.SF | LIVER        | 9  | 86581881  | + | NM_008615    | Me1           | - |
| DMM85 | Cdkn2a-/-_C57 | SIN.LV.SF | LIVER        | 9  | 104120790 | - | NM_207668    | Acpp          | - |
| DMM85 | Cdkn2a-/-_C57 | SIN.LV.SF | LIVER        | 9  | 106752052 | + | NM_001015507 | Vprbp         | + |
| DMM82 | Cdkn2a-/-_C57 | SIN.LV.SF | LIVER        | 9  | 107677524 | + | NM_011251    | Rbm6          | - |
| DMM85 | Cdkn2a-/-_C57 | SIN.LV.SF | LIVER        | 9  | 107740979 | - | NM_011251    | Rbm6          | - |
| DMM85 | Cdkn2a-/-_C57 | SIN.LV.SF | LIVER        | 9  | 110130151 | + | NM_009211    | Smarcc1       | + |
| DMM84 | Cdkn2a-/-_C57 | SIN.LV.SF | LIVER        | 9  | 110489923 | + | NM_001081340 | Setd2         | + |
| DMM85 | Cdkn2a-/-_C57 | SIN.LV.SF | LIVER        | 9  | 113768088 | + | NM_001081960 | Clasp2        | + |
| DMM82 | Cdkn2a-/-_C57 | SIN.LV.SF | LIVER        | 9  | 115184572 | + | NM_024222    | Stt3b         | - |
| DMM82 | Cdkn2a-/-_C57 | SIN.LV.SF | SPLEEN       | 9  | 115205772 | + | NM_024222    | Stt3b         | - |
| DMM82 | Cdkn2a-/-_C57 | SIN.LV.SF | VER - SPLEEN | 9  | 115205841 | - | NM_024222    | Stt3b         | - |
| DMM87 | Cdkn2a-/-_C57 | SIN.LV.SF | SPLEEN       | 9  | 116069187 | + | NM_029575    | Tgfbr2        | - |
| DMM85 | Cdkn2a-/-_C57 | SIN.LV.SF | LIVER        | 9  | 117960341 | + | NM_001048146 | Azi2          | + |
| DMM85 | Cdkn2a-/-_C57 | SIN.LV.SF | LIVER        | 10 | 10609838  | + | NM_001114333 | Grm1          | - |
| DMM82 | Cdkn2a-/-_C57 | SIN.LV.SF | LIVER        | 10 | 13038047  | - | NM_001033257 | Phactr2       | - |
| DMM85 | Cdkn2a-/-_C57 | SIN.LV.SF | LIVER        | 10 | 14093313  | + | NM_001002268 | Gpr126        | - |
| DMM85 | Cdkn2a-/-_C57 | SIN.LV.SF | LIVER        | 10 | 17305601  | + | NM_010828    | Cited2        | + |
| DMM85 | Cdkn2a-/-_C57 | SIN.LV.SF | LIVER        | 10 | 19608586  | - | NM_008822    | Pex7          | - |
| DMM82 | Cdkn2a-/-_C57 | SIN.LV.SF | VER - SPLEEN | 10 | 24789476  | + | NM_018747    | Akap7         | - |
| DMM85 | Cdkn2a-/-_C57 | SIN.LV.SF | LIVER        | 10 | 28692937  | + | NM_026336    | 2310057J18Rik | - |
| DMM85 | Cdkn2a-/-_C57 | SIN.LV.SF | LIVER        | 10 | 30426747  | - | NM_172495    | Ncoa7         | - |
| DMM85 | Cdkn2a-/-_C57 | SIN.LV.SF | LIVER        | 10 | 33651119  | + | NM_028287    | Zufsp         | - |
| DMM80 | Cdkn2a-/-_C57 | SIN.LV.SF | LIVER        | 10 | 33721424  | + | NM_025614    | Rwdd1         | - |
| DMM87 | Cdkn2a-/-_C57 | SIN.LV.SF | SPLEEN       | 10 | 36989228  | + | NM_008538    | Marcks        | - |

|       |               |           |              |    |           |   |              |               |   |
|-------|---------------|-----------|--------------|----|-----------|---|--------------|---------------|---|
| DMM85 | Cdkn2a-/-_C57 | SIN.LV.SF | LIVER        | 10 | 45359051  | + | NM_172473    | Hace1         | + |
| DMM85 | Cdkn2a-/-_C57 | SIN.LV.SF | LIVER        | 10 | 50338429  | - | NM_001146089 | Ascc3         | + |
| DMM82 | Cdkn2a-/-_C57 | SIN.LV.SF | VER - SPLEEN | 10 | 52148337  | + | NM_030250    | Nus1          | + |
| DMM82 | Cdkn2a-/-_C57 | SIN.LV.SF | SPLEEN       | 10 | 52148420  | - | NM_030250    | Nus1          | + |
| DMM85 | Cdkn2a-/-_C57 | SIN.LV.SF | LIVER        | 10 | 53046764  | + | NM_001141927 | Pln           | + |
| DMM85 | Cdkn2a-/-_C57 | SIN.LV.SF | LIVER        | 10 | 53145596  | + | NM_001141927 | Pln           | + |
| DMM85 | Cdkn2a-/-_C57 | SIN.LV.SF | LIVER        | 10 | 57999521  | - | NM_011240    | Ranbp2        | + |
| DMM85 | Cdkn2a-/-_C57 | SIN.LV.SF | LIVER        | 10 | 66626367  | + | NM_207221    | Jmjd1c        | + |
| DMM85 | Cdkn2a-/-_C57 | SIN.LV.SF | LIVER        | 10 | 68735649  | - | NM_001081347 | Rhobtb1       | + |
| DMM84 | Cdkn2a-/-_C57 | SIN.LV.SF | LIVER        | 10 | 68746704  | - | NM_001081347 | Rhobtb1       | + |
| DMM85 | Cdkn2a-/-_C57 | SIN.LV.SF | LIVER        | 10 | 69631572  | - | NM_001111121 | Ccdc6         | + |
| DMM85 | Cdkn2a-/-_C57 | SIN.LV.SF | LIVER        | 10 | 69679098  | + | NM_001111121 | Ccdc6         | + |
| DMM85 | Cdkn2a-/-_C57 | SIN.LV.SF | LIVER        | 10 | 76961240  | + | NM_133998    | 1810008A18Rik | - |
| DMM87 | Cdkn2a-/-_C57 | SIN.LV.SF | SPLEEN       | 10 | 81009074  | - | NM_010301    | Gna11         | - |
| DMM87 | Cdkn2a-/-_C57 | SIN.LV.SF | LIVER        | 10 | 82113161  | + | NM_011561    | Tdg           | + |
| DMM86 | Cdkn2a-/-_C57 | SIN.LV.SF | LIVER        | 10 | 88094754  | + | NM_175418    | Mybpc1        | - |
| DMM85 | Cdkn2a-/-_C57 | SIN.LV.SF | LIVER        | 10 | 88252140  | - | NM_175158    | Utp20         | - |
| DMM85 | Cdkn2a-/-_C57 | SIN.LV.SF | LIVER        | 10 | 89124662  | - | NM_198021    | Scyl2         | - |
| DMM85 | Cdkn2a-/-_C57 | SIN.LV.SF | LIVER        | 10 | 98575262  | + | NM_015737    | Galnt4        | + |
| DMM85 | Cdkn2a-/-_C57 | SIN.LV.SF | LIVER        | 10 | 100388383 | + | NM_001081246 | 1700017N19Rik | + |
| DMM86 | Cdkn2a-/-_C57 | SIN.LV.SF | LIVER        | 10 | 103437568 | + | NM_175328    | Slc6a15       | + |
| DMM82 | Cdkn2a-/-_C57 | SIN.LV.SF | LIVER        | 10 | 105396915 | - | NM_025602    | Ccdc59        | + |
| DMM85 | Cdkn2a-/-_C57 | SIN.LV.SF | LIVER        | 10 | 107601880 | + | NM_027892    | Ppp1r12a      | + |
| DMM85 | Cdkn2a-/-_C57 | SIN.LV.SF | LIVER        | 10 | 109781898 | + | NM_001081035 | Nav3          | - |
| DMM85 | Cdkn2a-/-_C57 | SIN.LV.SF | LIVER        | 10 | 122544542 | + | NM_027604    | Usp15         | - |
| DMM87 | Cdkn2a-/-_C57 | SIN.LV.SF | SPLEEN       | 11 | 3046164   | + | NM_030207    | Sfi1          | - |
| DMM85 | Cdkn2a-/-_C57 | SIN.LV.SF | LIVER        | 11 | 3071576   | + | NM_030207    | Sfi1          | - |
| DMM85 | Cdkn2a-/-_C57 | SIN.LV.SF | VER - SPLEEN | 11 | 3088404   | - | NM_030207    | Sfi1          | - |
| DMM85 | Cdkn2a-/-_C57 | SIN.LV.SF | LIVER        | 11 | 8400252   | + | NM_001083587 | Tns3          | - |
| DMM85 | Cdkn2a-/-_C57 | SIN.LV.SF | LIVER        | 11 | 17828119  | - | NM_026576    | Etaa1         | - |
| DMM85 | Cdkn2a-/-_C57 | SIN.LV.SF | LIVER        | 11 | 21003832  | - | NM_023324    | Peli1         | + |

|       |               |           |             |    |           |   |              |               |   |
|-------|---------------|-----------|-------------|----|-----------|---|--------------|---------------|---|
| DMM84 | Cdkn2a-/-_C57 | SIN.LV.SF | SPLEEN      | 11 | 21191405  | - | NM_139061    | Vps54         | + |
| DMM84 | Cdkn2a-/-_C57 | SIN.LV.SF | LIVER       | 11 | 21278749  | - | NM_139297    | Ugp2          | - |
| DMM86 | Cdkn2a-/-_C57 | SIN.LV.SF | SPLEEN      | 11 | 26188249  | - | NM_025923    | Fancl         | + |
| DMM85 | Cdkn2a-/-_C57 | SIN.LV.SF | LIVER       | 11 | 30120063  | - | NM_175836    | Spnb2         | - |
| DMM80 | Cdkn2a-/-_C57 | SIN.LV.SF | VER - SPLEE | 11 | 37929200  | + | NM_011856    | Odz2          | - |
| DMM87 | Cdkn2a-/-_C57 | SIN.LV.SF | SPLEEN      | 11 | 44273256  | - | NM_024475    | Ublcp1        | - |
| DMM85 | Cdkn2a-/-_C57 | SIN.LV.SF | LIVER       | 11 | 48908277  | + | NM_008330    | Ifi47         | + |
| DMM82 | Cdkn2a-/-_C57 | SIN.LV.SF | LIVER       | 11 | 49539186  | + | NM_212484    | Cnot6         | - |
| DMM85 | Cdkn2a-/-_C57 | SIN.LV.SF | LIVER       | 11 | 58110722  | - | NM_001040686 | Zfp692        | + |
| DMM85 | Cdkn2a-/-_C57 | SIN.LV.SF | LIVER       | 11 | 72014763  | + | NM_028963    | 4933427D14Rik | - |
| DMM85 | Cdkn2a-/-_C57 | SIN.LV.SF | LIVER       | 11 | 78344764  | + | NM_001159392 | Tnfaip1       | - |
| DMM85 | Cdkn2a-/-_C57 | SIN.LV.SF | LIVER       | 11 | 78344815  | - | NM_001159392 | Tnfaip1       | - |
| DMM85 | Cdkn2a-/-_C57 | SIN.LV.SF | LIVER       | 11 | 101409841 | + | NM_009764    | Brca1         | - |
| DMM80 | Cdkn2a-/-_C57 | SIN.LV.SF | LIVER       | 11 | 105706171 | + | NM_181071    | Tanc2         | + |
| DMM80 | Cdkn2a-/-_C57 | SIN.LV.SF | LIVER       | 11 | 107281637 | - | NM_145823    | Pitpnc1       | - |
| DMM85 | Cdkn2a-/-_C57 | SIN.LV.SF | LIVER       | 11 | 107960353 | - | NM_011101    | Prkca         | - |
| DMM85 | Cdkn2a-/-_C57 | SIN.LV.SF | LIVER       | 11 | 109544324 | + | NM_153782    | Fam20a        | - |
| DMM85 | Cdkn2a-/-_C57 | SIN.LV.SF | LIVER       | 12 | 3469440   | + | NM_172421    | Asxl2         | + |
| DMM86 | Cdkn2a-/-_C57 | SIN.LV.SF | VER - SPLEE | 12 | 4256871   | - | NM_010881    | Ncoa1         | - |
| DMM85 | Cdkn2a-/-_C57 | SIN.LV.SF | LIVER       | 12 | 5032741   | - | NM_001099628 | Atad2b        | + |
| DMM82 | Cdkn2a-/-_C57 | SIN.LV.SF | LIVER       | 12 | 6494822   | + | NM_001099628 | Atad2b        | + |
| DMM85 | Cdkn2a-/-_C57 | SIN.LV.SF | LIVER       | 12 | 8223812   | + | NM_172401    | 1110057K04Rik | + |
| DMM85 | Cdkn2a-/-_C57 | SIN.LV.SF | LIVER       | 12 | 11248958  | - | NM_177331    | 1-Jan         | - |
| DMM82 | Cdkn2a-/-_C57 | SIN.LV.SF | SPLEEN      | 12 | 27413773  | + | NM_020557    | Cmpk2         | + |
| DMM87 | Cdkn2a-/-_C57 | SIN.LV.SF | SPLEEN      | 12 | 29974509  | - | NM_001093775 | Myt1l         | + |
| DMM84 | Cdkn2a-/-_C57 | SIN.LV.SF | LIVER       | 12 | 31584757  | + | NM_001110239 | Acp1          | - |
| DMM84 | Cdkn2a-/-_C57 | SIN.LV.SF | LIVER       | 12 | 32447331  | + | NM_175191    | Gpr22         | - |
| DMM85 | Cdkn2a-/-_C57 | SIN.LV.SF | VER - SPLEE | 12 | 32873281  | - | NM_001146200 | Pik3cg        | - |
| DMM85 | Cdkn2a-/-_C57 | SIN.LV.SF | LIVER       | 12 | 33959496  | - | NM_001033436 | Atxn71l       | + |
| DMM85 | Cdkn2a-/-_C57 | SIN.LV.SF | LIVER       | 12 | 35767026  | + | NM_001014973 | Snx13         | + |
| DMM85 | Cdkn2a-/-_C57 | SIN.LV.SF | LIVER       | 12 | 41347858  | + | NM_172803    | Dock4         | + |

|       |               |           |              |    |           |   |              |               |   |
|-------|---------------|-----------|--------------|----|-----------|---|--------------|---------------|---|
| DMM82 | Cdkn2a-/-_C57 | SIN.LV.SF | LIVER        | 12 | 41934171  | + | NM_053122    | Immp21        | + |
| DMM82 | Cdkn2a-/-_C57 | SIN.LV.SF | SPLEEN       | 12 | 45414082  | + | NM_026164    | Pnpla8        | + |
| DMM80 | Cdkn2a-/-_C57 | SIN.LV.SF | VER - SPLEEN | 12 | 47846399  | - | NM_144552    | Stxbp6        | - |
| DMM82 | Cdkn2a-/-_C57 | SIN.LV.SF | LIVER        | 12 | 53619925  | + | NM_009706    | Arhgap5       | + |
| DMM85 | Cdkn2a-/-_C57 | SIN.LV.SF | LIVER        | 12 | 53672899  | - | NM_009706    | Arhgap5       | + |
| DMM85 | Cdkn2a-/-_C57 | SIN.LV.SF | LIVER        | 12 | 58310726  | + | NM_172577    | Slc25a21      | - |
| DMM85 | Cdkn2a-/-_C57 | SIN.LV.SF | LIVER        | 12 | 60266621  | + | NM_146034    | Ctage5        | + |
| DMM86 | Cdkn2a-/-_C57 | SIN.LV.SF | LIVER        | 12 | 66213905  | - | NM_178912    | Fancm         | + |
| DMM84 | Cdkn2a-/-_C57 | SIN.LV.SF | LIVER        | 12 | 68665706  | - | NM_207010    | Mdga2         | - |
| DMM85 | Cdkn2a-/-_C57 | SIN.LV.SF | LIVER        | 12 | 68955648  | + | NM_207010    | Mdga2         | - |
| DMM86 | Cdkn2a-/-_C57 | SIN.LV.SF | LIVER        | 12 | 70700010  | + | NM_001135559 | Sos2          | - |
| DMM85 | Cdkn2a-/-_C57 | SIN.LV.SF | LIVER        | 12 | 76808870  | + | NM_030750    | Sgpp1         | - |
| DMM82 | Cdkn2a-/-_C57 | SIN.LV.SF | LIVER        | 12 | 77667046  | - | NM_153804    | Plekhg3       | + |
| DMM85 | Cdkn2a-/-_C57 | SIN.LV.SF | LIVER        | 12 | 79607414  | + | NM_172952    | Gphn          | + |
| DMM86 | Cdkn2a-/-_C57 | SIN.LV.SF | LIVER        | 12 | 79979411  | + | NM_026114    | Eif2s1        | + |
| DMM85 | Cdkn2a-/-_C57 | SIN.LV.SF | LIVER        | 12 | 88725871  | - | NM_011479    | Sptlc2        | - |
| DMM84 | Cdkn2a-/-_C57 | SIN.LV.SF | SPLEEN       | 12 | 92541722  | - | NM_181815    | 4930534B04Rik | - |
| DMM85 | Cdkn2a-/-_C57 | SIN.LV.SF | VER - SPLEEN | 12 | 92900200  | + | NM_175367    | Ston2         | - |
| DMM86 | Cdkn2a-/-_C57 | SIN.LV.SF | LIVER        | 12 | 93068500  | - | NM_001039089 | Sel11         | - |
| DMM85 | Cdkn2a-/-_C57 | SIN.LV.SF | LIVER        | 12 | 94132377  | - | NM_001039089 | Sel11         | - |
| DMM82 | Cdkn2a-/-_C57 | SIN.LV.SF | LIVER        | 12 | 94184444  | - | NM_001039089 | Sel11         | - |
| DMM85 | Cdkn2a-/-_C57 | SIN.LV.SF | LIVER        | 12 | 96974522  | - | NM_201518    | Flrt2         | + |
| DMM82 | Cdkn2a-/-_C57 | SIN.LV.SF | VER - SPLEEN | 12 | 99992741  | + | NM_001008506 | Zc3h14        | + |
| DMM85 | Cdkn2a-/-_C57 | SIN.LV.SF | LIVER        | 12 | 99998961  | + | NM_001008506 | Zc3h14        | + |
| DMM86 | Cdkn2a-/-_C57 | SIN.LV.SF | SPLEEN       | 12 | 101192613 | - | NM_028354    | Tdp1          | + |
| DMM85 | Cdkn2a-/-_C57 | SIN.LV.SF | LIVER        | 12 | 105781096 | + | NM_010351    | Gsc           | - |
| DMM82 | Cdkn2a-/-_C57 | SIN.LV.SF | SPLEEN       | 12 | 120319495 | - | NM_177290    | Itgb8         | - |
| DMM85 | Cdkn2a-/-_C57 | SIN.LV.SF | LIVER        | 12 | 120612308 | - | NM_177290    | Itgb8         | - |
| DMM85 | Cdkn2a-/-_C57 | SIN.LV.SF | LIVER        | 13 | 3913538   | + | NM_019671    | Net1          | - |
| DMM84 | Cdkn2a-/-_C57 | SIN.LV.SF | LIVER        | 13 | 4194931   | + | NM_013778    | Akr1c13       | + |
| DMM85 | Cdkn2a-/-_C57 | SIN.LV.SF | LIVER        | 13 | 5684566   | - | NM_011803    | Klf6          | + |

|       |               |           |                |    |          |   |              |               |   |
|-------|---------------|-----------|----------------|----|----------|---|--------------|---------------|---|
| DMM85 | Cdkn2a-/-_C57 | SIN.LV.SF | LIVER          | 13 | 10202597 | - | NM_033269    | Chrm3         | - |
| DMM80 | Cdkn2a-/-_C57 | SIN.LV.SF | LIVER          | 13 | 13843230 | - | NM_010748    | Lyst          | + |
| DMM87 | Cdkn2a-/-_C57 | SIN.LV.SF | LIVER          | 13 | 14108382 | + | NM_178337    | Tbce          | - |
| DMM85 | Cdkn2a-/-_C57 | SIN.LV.SF | LIVER          | 13 | 14205893 | + | NM_194262    | Arid4b        | + |
| DMM85 | Cdkn2a-/-_C57 | SIN.LV.SF | LIVER          | 13 | 14230006 | - | NM_194262    | Arid4b        | + |
| DMM85 | Cdkn2a-/-_C57 | SIN.LV.SF | LIVER          | 13 | 17820214 | + | NM_001081058 | Cdc2l5        | - |
| DMM85 | Cdkn2a-/-_C57 | SIN.LV.SF | LIVER          | 13 | 17842706 | + | NM_001081058 | Cdc2l5        | - |
| DMM85 | Cdkn2a-/-_C57 | SIN.LV.SF | LIVER          | 13 | 26329872 | - | NM_008232    | Hdgfl1        | - |
| DMM86 | Cdkn2a-/-_C57 | SIN.LV.SF | LIVER          | 13 | 26901725 | - | NM_008232    | Hdgfl1        | - |
| DMM85 | Cdkn2a-/-_C57 | SIN.LV.SF | LIVER          | 13 | 31037020 | + | NM_025588    | Exoc2         | - |
| DMM85 | Cdkn2a-/-_C57 | SIN.LV.SF | LIVER          | 13 | 33035513 | - | NM_011454    | Serpinb6b     | + |
| DMM85 | Cdkn2a-/-_C57 | SIN.LV.SF | LIVER - SPLEEN | 13 | 33082690 | + | NM_011454    | Serpinb6b     | + |
| DMM85 | Cdkn2a-/-_C57 | SIN.LV.SF | LIVER          | 13 | 33082816 | - | NM_011454    | Serpinb6b     | + |
| DMM84 | Cdkn2a-/-_C57 | SIN.LV.SF | LIVER          | 13 | 39024362 | + | NM_134060    | Slc35b3       | - |
| DMM86 | Cdkn2a-/-_C57 | SIN.LV.SF | LIVER          | 13 | 43540185 | - | NM_019930    | Ranbp9        | - |
| DMM85 | Cdkn2a-/-_C57 | SIN.LV.SF | LIVER          | 13 | 45407620 | + | NM_153789    | Myliip        | + |
| DMM86 | Cdkn2a-/-_C57 | SIN.LV.SF | LIVER          | 13 | 46794561 | - | NM_175749    | Nup153        | - |
| DMM82 | Cdkn2a-/-_C57 | SIN.LV.SF | SPLEEN         | 13 | 48267575 | + | NM_031166    | Id4           | + |
| DMM85 | Cdkn2a-/-_C57 | SIN.LV.SF | LIVER          | 13 | 49566763 | + | NM_025495    | Cenpp         | - |
| DMM85 | Cdkn2a-/-_C57 | SIN.LV.SF | LIVER          | 13 | 63452640 | + | NM_007985    | Fance         | - |
| DMM85 | Cdkn2a-/-_C57 | SIN.LV.SF | LIVER          | 13 | 64235378 | + | NM_175494    | Zfp367        | - |
| DMM87 | Cdkn2a-/-_C57 | SIN.LV.SF | LIVER          | 13 | 65176018 | + | NM_001083901 | Hiat1l        | - |
| DMM85 | Cdkn2a-/-_C57 | SIN.LV.SF | LIVER          | 13 | 65195780 | + | NM_001083901 | Hiat1l        | - |
| DMM82 | Cdkn2a-/-_C57 | SIN.LV.SF | LIVER          | 13 | 67082571 | + | NM_008959    | Ptdss1        | + |
| DMM85 | Cdkn2a-/-_C57 | SIN.LV.SF | LIVER          | 13 | 74494976 | + | NM_024201    | Ccdc127       | + |
| DMM85 | Cdkn2a-/-_C57 | SIN.LV.SF | LIVER          | 13 | 75284440 | - | NM_013628    | Pcsk1         | + |
| DMM85 | Cdkn2a-/-_C57 | SIN.LV.SF | LIVER          | 13 | 75854875 | - | NM_138953    | Ell2          | + |
| DMM85 | Cdkn2a-/-_C57 | SIN.LV.SF | LIVER          | 13 | 76887293 | + | NM_030174    | Mctpl         | + |
| DMM84 | Cdkn2a-/-_C57 | SIN.LV.SF | LIVER          | 13 | 78030484 | + | NM_001145676 | 2210408I21Rik | + |
| DMM85 | Cdkn2a-/-_C57 | SIN.LV.SF | LIVER          | 13 | 82367829 | - | NM_007684    | Cetn3         | + |
| DMM85 | Cdkn2a-/-_C57 | SIN.LV.SF | LIVER          | 13 | 83221290 | + | NM_025282    | Mef2c         | + |

|       |               |           |              |    |           |   |              |           |   |
|-------|---------------|-----------|--------------|----|-----------|---|--------------|-----------|---|
| DMM80 | Cdkn2a-/-_C57 | SIN.LV.SF | LIVER        | 13 | 83642588  | + | NM_025282    | Mef2c     | + |
| DMM85 | Cdkn2a-/-_C57 | SIN.LV.SF | LIVER        | 13 | 85372675  | - | NM_145452    | Rasa1     | - |
| DMM85 | Cdkn2a-/-_C57 | SIN.LV.SF | LIVER        | 13 | 85392149  | - | NM_145452    | Rasa1     | - |
| DMM85 | Cdkn2a-/-_C57 | SIN.LV.SF | LIVER        | 13 | 88928227  | - | NM_001037987 | Edil3     | + |
| DMM85 | Cdkn2a-/-_C57 | SIN.LV.SF | LIVER        | 13 | 90016386  | + | NM_028012    | Xrcc4     | - |
| DMM85 | Cdkn2a-/-_C57 | SIN.LV.SF | LIVER        | 13 | 91159151  | + | NM_025770    | Atg10     | - |
| DMM85 | Cdkn2a-/-_C57 | SIN.LV.SF | LIVER        | 13 | 91220479  | - | NM_025770    | Atg10     | - |
| DMM85 | Cdkn2a-/-_C57 | SIN.LV.SF | LIVER        | 13 | 93275201  | + | NM_173392    | Zfyve16   | - |
| DMM85 | Cdkn2a-/-_C57 | SIN.LV.SF | SPLEEN       | 13 | 94558146  | + | NM_009712    | Arsb      | + |
| DMM84 | Cdkn2a-/-_C57 | SIN.LV.SF | LIVER        | 13 | 97941766  | + | NM_177266    | Gfm2      | + |
| DMM86 | Cdkn2a-/-_C57 | SIN.LV.SF | SPLEEN       | 13 | 100001829 | + | NM_001004149 | Zfp366    | + |
| DMM86 | Cdkn2a-/-_C57 | SIN.LV.SF | VER - SPLEEN | 13 | 100001958 | - | NM_001004149 | Zfp366    | + |
| DMM86 | Cdkn2a-/-_C57 | SIN.LV.SF | VER - SPLEEN | 13 | 102456150 | - | NM_001024955 | Pik3r1    | - |
| DMM85 | Cdkn2a-/-_C57 | SIN.LV.SF | LIVER        | 13 | 104638290 | + | NM_001005868 | Erb2ip    | - |
| DMM84 | Cdkn2a-/-_C57 | SIN.LV.SF | VER - SPLEEN | 13 | 105097768 | - | NM_001081020 | Adamts6   | + |
| DMM84 | Cdkn2a-/-_C57 | SIN.LV.SF | LIVER        | 13 | 105952721 | - | NM_027934    | Rnf180    | - |
| DMM85 | Cdkn2a-/-_C57 | SIN.LV.SF | LIVER        | 13 | 118015870 | + | NM_010330    | Emb       | + |
| DMM85 | Cdkn2a-/-_C57 | SIN.LV.SF | VER - SPLEEN | 13 | 120109936 | - | NM_008710    | Nnt       | - |
| DMM86 | Cdkn2a-/-_C57 | SIN.LV.SF | LIVER        | 13 | 120115083 | + | NM_008710    | Nnt       | - |
| DMM82 | Cdkn2a-/-_C57 | SIN.LV.SF | VER - SPLEEN | 14 | 14912267  | - | NM_139227    | Atxn7     | + |
| DMM84 | Cdkn2a-/-_C57 | SIN.LV.SF | LIVER        | 14 | 15625769  | - | NM_001033270 | Slc4a7    | + |
| DMM85 | Cdkn2a-/-_C57 | SIN.LV.SF | LIVER        | 14 | 15627704  | - | NM_001033270 | Slc4a7    | + |
| DMM87 | Cdkn2a-/-_C57 | SIN.LV.SF | VER - SPLEEN | 14 | 15698415  | - | NM_001034865 | Nek10     | + |
| DMM85 | Cdkn2a-/-_C57 | SIN.LV.SF | LIVER        | 14 | 18760411  | + | NM_001113417 | Thrb      | + |
| DMM82 | Cdkn2a-/-_C57 | SIN.LV.SF | LIVER        | 14 | 26363126  | - | NM_183208    | Zmiz1     | + |
| DMM85 | Cdkn2a-/-_C57 | SIN.LV.SF | LIVER        | 14 | 26474871  | + | NM_183208    | Zmiz1     | + |
| DMM85 | Cdkn2a-/-_C57 | SIN.LV.SF | LIVER        | 14 | 28179456  | + | NM_027871    | Arhgef3   | + |
| DMM80 | Cdkn2a-/-_C57 | SIN.LV.SF | LIVER        | 14 | 28273149  | + | NM_001114879 | D14Abbl1e | + |
| DMM80 | Cdkn2a-/-_C57 | SIN.LV.SF | LIVER        | 14 | 28273234  | - | NM_001114879 | D14Abbl1e | + |
| DMM85 | Cdkn2a-/-_C57 | SIN.LV.SF | LIVER        | 14 | 31222491  | + | NM_028981    | Cacna1d   | - |
| DMM86 | Cdkn2a-/-_C57 | SIN.LV.SF | LIVER        | 14 | 32233947  | - | NM_011894    | Sh3bp5    | - |



|       |               |           |              |    |           |   |              |               |   |
|-------|---------------|-----------|--------------|----|-----------|---|--------------|---------------|---|
| DMM82 | Cdkn2a-/-_C57 | SIN.LV.SF | LIVER        | 14 | 35081409  | + | NM_029389    | 3110001K24Rik | - |
| DMM85 | Cdkn2a-/-_C57 | SIN.LV.SF | LIVER        | 14 | 37735456  | + | NM_028407    | Gcap14        | - |
| DMM82 | Cdkn2a-/-_C57 | SIN.LV.SF | LIVER        | 14 | 37955991  | + | NM_078478    | Ghitm         | - |
| DMM85 | Cdkn2a-/-_C57 | SIN.LV.SF | LIVER        | 14 | 45712766  | + | NM_172597    | Txndc16       | - |
| DMM86 | Cdkn2a-/-_C57 | SIN.LV.SF | LIVER        | 14 | 45759451  | - | NM_172597    | Txndc16       | - |
| DMM82 | Cdkn2a-/-_C57 | SIN.LV.SF | LIVER        | 14 | 52704788  | + | NM_016884    | Hrnpc         | - |
| DMM85 | Cdkn2a-/-_C57 | SIN.LV.SF | LIVER        | 14 | 55758565  | - | NM_177049    | Jph4          | - |
| DMM82 | Cdkn2a-/-_C57 | SIN.LV.SF | LIVER        | 14 | 56224521  | - | NM_001159418 | Irf9          | + |
| DMM85 | Cdkn2a-/-_C57 | SIN.LV.SF | LIVER        | 14 | 57521451  | + | NM_029498    | Zmym2         | + |
| DMM85 | Cdkn2a-/-_C57 | SIN.LV.SF | LIVER        | 14 | 58928984  | - | NM_013518    | Fgf9          | + |
| DMM85 | Cdkn2a-/-_C57 | SIN.LV.SF | LIVER        | 14 | 59165609  | + | NM_013518    | Fgf9          | + |
| DMM85 | Cdkn2a-/-_C57 | SIN.LV.SF | LIVER        | 14 | 62903762  | + | NM_173419    | Dleu7         | - |
| DMM85 | Cdkn2a-/-_C57 | SIN.LV.SF | LIVER        | 14 | 63354250  | + | NM_008715    | Ints6         | - |
| DMM82 | Cdkn2a-/-_C57 | SIN.LV.SF | LIVER        | 14 | 63530489  | + | NM_175546    | Wdfy2         | + |
| DMM85 | Cdkn2a-/-_C57 | SIN.LV.SF | LIVER        | 14 | 64160186  | - | NM_177594    | Mtmr9         | - |
| DMM86 | Cdkn2a-/-_C57 | SIN.LV.SF | SPLEEN       | 14 | 65358177  | - | NM_001081177 | Kif13b        | + |
| DMM85 | Cdkn2a-/-_C57 | SIN.LV.SF | LIVER        | 14 | 65511957  | + | NM_177338    | Hmbox1        | - |
| DMM85 | Cdkn2a-/-_C57 | SIN.LV.SF | VER - SPLEEN | 14 | 68456973  | - | NM_177780    | Dock5         | - |
| DMM82 | Cdkn2a-/-_C57 | SIN.LV.SF | LIVER        | 14 | 72945122  | + | NM_207636    | Fndc3a        | - |
| DMM85 | Cdkn2a-/-_C57 | SIN.LV.SF | LIVER        | 14 | 73672288  | + | NM_009029    | Rb1           | - |
| DMM85 | Cdkn2a-/-_C57 | SIN.LV.SF | LIVER        | 14 | 79254822  | - | NM_027906    | 1300010F03Rik | + |
| DMM86 | Cdkn2a-/-_C57 | SIN.LV.SF | LIVER        | 14 | 79427745  | - | NM_173758    | 1300010F03Rik | + |
| DMM85 | Cdkn2a-/-_C57 | SIN.LV.SF | LIVER        | 14 | 79816041  | - | NM_145960    | Mtrf1         | + |
| DMM85 | Cdkn2a-/-_C57 | SIN.LV.SF | LIVER        | 14 | 79889869  | - | NM_007920    | Elf1          | + |
| DMM82 | Cdkn2a-/-_C57 | SIN.LV.SF | SPLEEN       | 14 | 87136664  | - | NM_019670    | Diap3         | - |
| DMM85 | Cdkn2a-/-_C57 | SIN.LV.SF | LIVER        | 14 | 88694130  | - | NM_178685    | Pcdh20        | - |
| DMM86 | Cdkn2a-/-_C57 | SIN.LV.SF | LIVER        | 14 | 94098313  | - | NM_001081377 | Pcdh9         | - |
| DMM85 | Cdkn2a-/-_C57 | SIN.LV.SF | LIVER        | 14 | 99212340  | - | NM_175245    | 2410129H14Rik | - |
| DMM85 | Cdkn2a-/-_C57 | SIN.LV.SF | LIVER        | 14 | 99453355  | + | NM_175265    | 6720463M24Rik | + |
| DMM86 | Cdkn2a-/-_C57 | SIN.LV.SF | LIVER        | 14 | 99590518  | + | NM_029320    | Pibf1         | + |
| DMM85 | Cdkn2a-/-_C57 | SIN.LV.SF | LIVER        | 14 | 100614755 | - | NM_010636    | Klf12         | - |

|       |               |           |        |    |           |   |              |         |   |
|-------|---------------|-----------|--------|----|-----------|---|--------------|---------|---|
| DMM85 | Cdkn2a-/-_C57 | SIN.LV.SF | LIVER  | 14 | 101846627 | + | NM_001081278 | Tbc1d4  | - |
| DMM82 | Cdkn2a-/-_C57 | SIN.LV.SF | SPLEEN | 14 | 101924143 | + | NM_001081278 | Tbc1d4  | - |
| DMM84 | Cdkn2a-/-_C57 | SIN.LV.SF | LIVER  | 14 | 102074626 | - | NM_016723    | Uchl3   | + |
| DMM85 | Cdkn2a-/-_C57 | SIN.LV.SF | LIVER  | 14 | 102151001 | - | NM_201529    | Lmo7    | + |
| DMM86 | Cdkn2a-/-_C57 | SIN.LV.SF | LIVER  | 14 | 103153771 | + | NM_177715    | Kctd12  | - |
| DMM84 | Cdkn2a-/-_C57 | SIN.LV.SF | LIVER  | 14 | 103265153 | + | NM_177715    | Kctd12  | - |
| DMM85 | Cdkn2a-/-_C57 | SIN.LV.SF | LIVER  | 14 | 105529929 | + | NM_134077    | Rbm26   | - |
| DMM82 | Cdkn2a-/-_C57 | SIN.LV.SF | LIVER  | 14 | 107072515 | - | NM_198601    | Trim52  | + |
| DMM86 | Cdkn2a-/-_C57 | SIN.LV.SF | LIVER  | 14 | 109057302 | - | NM_199065    | Slitrk1 | - |
| DMM82 | Cdkn2a-/-_C57 | SIN.LV.SF | LIVER  | 14 | 115442631 | + | NM_175500    | Gpc5    | + |
| DMM87 | Cdkn2a-/-_C57 | SIN.LV.SF | LIVER  | 14 | 117600827 | + | NM_001079844 | Gpc6    | + |
| DMM85 | Cdkn2a-/-_C57 | SIN.LV.SF | LIVER  | 14 | 117997921 | - | NM_001079844 | Gpc6    | + |
| DMM86 | Cdkn2a-/-_C57 | SIN.LV.SF | LIVER  | 14 | 120768859 | + | NM_175341    | Mbnl2   | + |
| DMM85 | Cdkn2a-/-_C57 | SIN.LV.SF | LIVER  | 14 | 121754162 | - | NM_145465    | Stk24   | - |
| DMM85 | Cdkn2a-/-_C57 | SIN.LV.SF | LIVER  | 15 | 5443803   | - | NM_008965    | Ptger4  | - |
| DMM85 | Cdkn2a-/-_C57 | SIN.LV.SF | LIVER  | 15 | 6567547   | + | NM_011815    | Fyb     | + |
| DMM85 | Cdkn2a-/-_C57 | SIN.LV.SF | LIVER  | 15 | 9072836   | - | NM_177178    | Lmbrd2  | + |
| DMM82 | Cdkn2a-/-_C57 | SIN.LV.SF | LIVER  | 15 | 9075141   | + | NM_177178    | Lmbrd2  | + |
| DMM85 | Cdkn2a-/-_C57 | SIN.LV.SF | LIVER  | 15 | 9112148   | + | NM_177178    | Lmbrd2  | + |
| DMM85 | Cdkn2a-/-_C57 | SIN.LV.SF | LIVER  | 15 | 10838453  | + | NM_030888    | C1qtnf3 | + |
| DMM85 | Cdkn2a-/-_C57 | SIN.LV.SF | LIVER  | 15 | 11915830  | + | NM_011294    | Sub1    | - |
| DMM85 | Cdkn2a-/-_C57 | SIN.LV.SF | LIVER  | 15 | 11919531  | - | NM_011294    | Sub1    | - |
| DMM85 | Cdkn2a-/-_C57 | SIN.LV.SF | LIVER  | 15 | 12060896  | - | NM_011767    | Zfr     | + |
| DMM85 | Cdkn2a-/-_C57 | SIN.LV.SF | LIVER  | 15 | 12138519  | - | NM_172958    | Mtmr12  | + |
| DMM84 | Cdkn2a-/-_C57 | SIN.LV.SF | LIVER  | 15 | 18752695  | - | NM_009865    | Cdh10   | + |
| DMM84 | Cdkn2a-/-_C57 | SIN.LV.SF | LIVER  | 15 | 19633181  | - | NM_009865    | Cdh10   | + |
| DMM85 | Cdkn2a-/-_C57 | SIN.LV.SF | LIVER  | 15 | 19815274  | + | NM_022816    | Acot10  | - |
| DMM85 | Cdkn2a-/-_C57 | SIN.LV.SF | LIVER  | 15 | 20969551  | + | NM_001008420 | Cdh12   | + |
| DMM84 | Cdkn2a-/-_C57 | SIN.LV.SF | LIVER  | 15 | 28337269  | + | NM_133365    | Dnahc5  | + |
| DMM85 | Cdkn2a-/-_C57 | SIN.LV.SF | LIVER  | 15 | 30535761  | - | NM_008729    | Ctnnd2  | + |
| DMM82 | Cdkn2a-/-_C57 | SIN.LV.SF | LIVER  | 15 | 31181747  | + | NM_146057    | Dap     | + |

|       |               |           |                |    |          |   |              |             |   |
|-------|---------------|-----------|----------------|----|----------|---|--------------|-------------|---|
| DMM85 | Cdkn2a-/-_C57 | SIN.LV.SF | LIVER          | 15 | 33024840 | - | NM_018755    | Pgcp        | + |
| DMM84 | Cdkn2a-/-_C57 | SIN.LV.SF | LIVER          | 15 | 33045993 | + | NM_018755    | Pgcp        | + |
| DMM85 | Cdkn2a-/-_C57 | SIN.LV.SF | LIVER          | 15 | 34045791 | - | NM_026002    | Mtdh        | + |
| DMM86 | Cdkn2a-/-_C57 | SIN.LV.SF | LIVER          | 15 | 35799516 | + | NM_177151    | Vps13b      | + |
| DMM85 | Cdkn2a-/-_C57 | SIN.LV.SF | LIVER          | 15 | 40574408 | - | NM_011766    | Zfpm2       | + |
| DMM86 | Cdkn2a-/-_C57 | SIN.LV.SF | LIVER          | 15 | 41573229 | + | NM_001130166 | Oxr1        | + |
| DMM85 | Cdkn2a-/-_C57 | SIN.LV.SF | LIVER          | 15 | 41695697 | + | NM_175456    | Abra        | - |
| DMM86 | Cdkn2a-/-_C57 | SIN.LV.SF | LIVER          | 15 | 43366875 | - | NM_025736    | Ttc35       | + |
| DMM85 | Cdkn2a-/-_C57 | SIN.LV.SF | LIVER          | 15 | 44238053 | - | NM_001113554 | Nudcd1      | - |
| DMM85 | Cdkn2a-/-_C57 | SIN.LV.SF | LIVER          | 15 | 44472960 | + | NM_019480    | Ebag9       | + |
| DMM84 | Cdkn2a-/-_C57 | SIN.LV.SF | LIVER          | 15 | 50586597 | - | NM_032000    | Trps1       | - |
| DMM85 | Cdkn2a-/-_C57 | SIN.LV.SF | LIVER          | 15 | 50600642 | + | NM_032000    | Trps1       | - |
| DMM87 | Cdkn2a-/-_C57 | SIN.LV.SF | SPLEEN         | 15 | 54877934 | - | NM_001081288 | Taf2        | - |
| DMM85 | Cdkn2a-/-_C57 | SIN.LV.SF | LIVER          | 15 | 54893775 | - | NM_001081288 | Taf2        | - |
| DMM85 | Cdkn2a-/-_C57 | SIN.LV.SF | LIVER          | 15 | 56556851 | + | NM_008216    | Has2        | - |
| DMM85 | Cdkn2a-/-_C57 | SIN.LV.SF | LIVER          | 15 | 58250981 | + | NM_145959    | D15Ertd621e | + |
| DMM86 | Cdkn2a-/-_C57 | SIN.LV.SF | LIVER          | 15 | 58462150 | + | NM_175212    | Tmem65      | - |
| DMM86 | Cdkn2a-/-_C57 | SIN.LV.SF | LIVER          | 15 | 58462218 | - | NM_175212    | Tmem65      | - |
| DMM85 | Cdkn2a-/-_C57 | SIN.LV.SF | LIVER          | 15 | 58738647 | + | NM_175151    | Tatdn1      | - |
| DMM85 | Cdkn2a-/-_C57 | SIN.LV.SF | LIVER          | 15 | 62935136 | + | NM_031378    | Gsdmc       | - |
| DMM85 | Cdkn2a-/-_C57 | SIN.LV.SF | LIVER          | 15 | 64089652 | - | NM_010026    | Asap1       | - |
| DMM82 | Cdkn2a-/-_C57 | SIN.LV.SF | LIVER          | 15 | 65104195 | + | NM_009623    | Adcy8       | - |
| DMM82 | Cdkn2a-/-_C57 | SIN.LV.SF | LIVER          | 15 | 67349717 | + | NM_009177    | St3gall     | - |
| DMM82 | Cdkn2a-/-_C57 | SIN.LV.SF | LIVER - SPLEEN | 15 | 73184428 | + | NM_001130409 | Ptk2        | - |
| DMM85 | Cdkn2a-/-_C57 | SIN.LV.SF | LIVER          | 15 | 74916273 | - | NM_001099217 | Ly6c2       | - |
| DMM85 | Cdkn2a-/-_C57 | SIN.LV.SF | LIVER          | 15 | 82680794 | + | NM_001114140 | Tcf20       | - |
| DMM85 | Cdkn2a-/-_C57 | SIN.LV.SF | LIVER          | 15 | 91018925 | + | NM_011994    | Abcd2       | - |
| DMM85 | Cdkn2a-/-_C57 | SIN.LV.SF | LIVER          | 15 | 96266818 | + | NM_028148    | Sfrs2ip     | - |
| DMM80 | Cdkn2a-/-_C57 | SIN.LV.SF | LIVER          | 15 | 96286311 | + | NM_028148    | Sfrs2ip     | - |
| DMM84 | Cdkn2a-/-_C57 | SIN.LV.SF | LIVER          | 16 | 7542964  | - | NM_021477    | A2bp1       | + |
| DMM82 | Cdkn2a-/-_C57 | SIN.LV.SF | LIVER          | 16 | 17463624 | - | NM_007764    | Crkl        | + |

|       |               |           |             |    |          |   |              |          |   |
|-------|---------------|-----------|-------------|----|----------|---|--------------|----------|---|
| DMM85 | Cdkn2a-/-_C57 | SIN.LV.SF | LIVER       | 16 | 20121571 | + | NM_029436    | Klhl24   | + |
| DMM85 | Cdkn2a-/-_C57 | SIN.LV.SF | LIVER       | 16 | 32894368 | - | NM_001159349 | Fytd1    | + |
| DMM86 | Cdkn2a-/-_C57 | SIN.LV.SF | LIVER       | 16 | 36731657 | - | NM_134109    | Ildr1    | + |
| DMM84 | Cdkn2a-/-_C57 | SIN.LV.SF | LIVER       | 16 | 39430040 | + | NM_170599    | Igsf11   | + |
| DMM85 | Cdkn2a-/-_C57 | SIN.LV.SF | LIVER       | 16 | 43403036 | - | NM_019778    | Zbtb20   | + |
| DMM85 | Cdkn2a-/-_C57 | SIN.LV.SF | LIVER       | 16 | 43432708 | - | NM_019778    | Zbtb20   | + |
| DMM85 | Cdkn2a-/-_C57 | SIN.LV.SF | LIVER       | 16 | 43628698 | - | NM_019778    | Zbtb20   | + |
| DMM87 | Cdkn2a-/-_C57 | SIN.LV.SF | SPLEEN      | 16 | 44126053 | + | NM_007508    | Atp6v1a  | - |
| DMM82 | Cdkn2a-/-_C57 | SIN.LV.SF | LIVER       | 16 | 44730052 | + | NM_145972    | BC027231 | + |
| DMM82 | Cdkn2a-/-_C57 | SIN.LV.SF | LIVER       | 16 | 45737222 | - | NM_172511    | Abhd10   | - |
| DMM85 | Cdkn2a-/-_C57 | SIN.LV.SF | LIVER       | 16 | 45998988 | + | NM_001134480 | Plcx2    | - |
| DMM85 | Cdkn2a-/-_C57 | SIN.LV.SF | LIVER       | 16 | 50465556 | - | NM_027444    | Bbx      | - |
| DMM84 | Cdkn2a-/-_C57 | SIN.LV.SF | LIVER       | 16 | 52143619 | - | NM_001033238 | Cblb     | + |
| DMM85 | Cdkn2a-/-_C57 | SIN.LV.SF | LIVER       | 16 | 52179553 | + | NM_001033238 | Cblb     | + |
| DMM85 | Cdkn2a-/-_C57 | SIN.LV.SF | LIVER       | 16 | 52486318 | + | NM_009655    | Alcam    | - |
| DMM85 | Cdkn2a-/-_C57 | SIN.LV.SF | LIVER       | 16 | 52938173 | + | NM_009655    | Alcam    | - |
| DMM85 | Cdkn2a-/-_C57 | SIN.LV.SF | LIVER       | 16 | 55745052 | + | NM_001159394 | Nfkbiz   | - |
| DMM82 | Cdkn2a-/-_C57 | SIN.LV.SF | LIVER       | 16 | 56649940 | - | NM_001014399 | Abi3bp   | + |
| DMM85 | Cdkn2a-/-_C57 | SIN.LV.SF | LIVER       | 16 | 56698736 | + | NM_019678    | Tfg      | - |
| DMM85 | Cdkn2a-/-_C57 | SIN.LV.SF | LIVER       | 16 | 59537214 | - | NM_174848    | Crybg3   | - |
| DMM85 | Cdkn2a-/-_C57 | SIN.LV.SF | LIVER       | 16 | 59594807 | + | NM_019665    | Arl6     | - |
| DMM82 | Cdkn2a-/-_C57 | SIN.LV.SF | LIVER       | 16 | 65430253 | + | NM_008849    | Pou1f1   | + |
| DMM85 | Cdkn2a-/-_C57 | SIN.LV.SF | LIVER       | 16 | 68214135 | - | NM_001145977 | Cadm2    | - |
| DMM85 | Cdkn2a-/-_C57 | SIN.LV.SF | LIVER       | 16 | 70364301 | - | NM_028803    | Gbe1     | + |
| DMM85 | Cdkn2a-/-_C57 | SIN.LV.SF | LIVER       | 16 | 70509254 | + | NM_028803    | Gbe1     | + |
| DMM84 | Cdkn2a-/-_C57 | SIN.LV.SF | LIVER       | 16 | 70795223 | + | NM_028803    | Gbe1     | + |
| DMM85 | Cdkn2a-/-_C57 | SIN.LV.SF | LIVER       | 16 | 71112918 | + | NM_028803    | Gbe1     | + |
| DMM85 | Cdkn2a-/-_C57 | SIN.LV.SF | LIVER       | 16 | 72447269 | - | NM_019413    | Robo1    | + |
| DMM86 | Cdkn2a-/-_C57 | SIN.LV.SF | VER - SPLEE | 16 | 75784269 | + | NM_030201    | Hspa13   | - |
| DMM85 | Cdkn2a-/-_C57 | SIN.LV.SF | LIVER       | 16 | 76008932 | - | NM_023380    | Samsn1   | - |
| DMM82 | Cdkn2a-/-_C57 | SIN.LV.SF | VER - SPLEE | 16 | 78241295 | + | NM_001025192 | Cxadr    | + |

|       |               |           |             |    |          |   |              |          |   |
|-------|---------------|-----------|-------------|----|----------|---|--------------|----------|---|
| DMM82 | Cdkn2a-/-_C57 | SIN.LV.SF | SPLEEN      | 16 | 78241613 | - | NM_001025192 | Cxadr    | + |
| DMM85 | Cdkn2a-/-_C57 | SIN.LV.SF | LIVER       | 16 | 84983338 | - | NM_007471    | App      | - |
| DMM82 | Cdkn2a-/-_C57 | SIN.LV.SF | VER - SPLEE | 16 | 93840498 | - | NM_001045529 | Morc3    | + |
| DMM85 | Cdkn2a-/-_C57 | SIN.LV.SF | LIVER       | 16 | 97680382 | + | NM_010846    | Mx1      | - |
| DMM85 | Cdkn2a-/-_C57 | SIN.LV.SF | SPLEEN      | 16 | 98114010 | + | NM_174847    | C2cd2    | - |
| DMM85 | Cdkn2a-/-_C57 | SIN.LV.SF | SPLEEN      | 16 | 98114105 | - | NM_174847    | C2cd2    | - |
| DMM85 | Cdkn2a-/-_C57 | SIN.LV.SF | SPLEEN      | 16 | 98114194 | - | NM_174847    | C2cd2    | - |
| DMM85 | Cdkn2a-/-_C57 | SIN.LV.SF | SPLEEN      | 16 | 98114277 | - | NM_174847    | C2cd2    | - |
| DMM85 | Cdkn2a-/-_C57 | SIN.LV.SF | LIVER       | 17 | 8494183  | - | NM_018819    | Brp44l   | + |
| DMM85 | Cdkn2a-/-_C57 | SIN.LV.SF | LIVER       | 17 | 10453122 | + | NM_001159516 | Qk       | - |
| DMM82 | Cdkn2a-/-_C57 | SIN.LV.SF | VER - SPLEE | 17 | 15826015 | - | NM_007690    | Chd1     | + |
| DMM87 | Cdkn2a-/-_C57 | SIN.LV.SF | SPLEEN      | 17 | 16189295 | - | NM_178615    | Rgmb     | - |
| DMM85 | Cdkn2a-/-_C57 | SIN.LV.SF | LIVER       | 17 | 17517229 | - | NM_025934    | Riok2    | + |
| DMM84 | Cdkn2a-/-_C57 | SIN.LV.SF | LIVER       | 17 | 21155143 | + | NM_145483    | Zfp160   | + |
| DMM84 | Cdkn2a-/-_C57 | SIN.LV.SF | SPLEEN      | 17 | 21155259 | + | NM_145483    | Zfp160   | + |
| DMM84 | Cdkn2a-/-_C57 | SIN.LV.SF | SPLEEN      | 17 | 21155297 | - | NM_145483    | Zfp160   | + |
| DMM82 | Cdkn2a-/-_C57 | SIN.LV.SF | LIVER       | 17 | 21157582 | + | NM_145483    | Zfp160   | + |
| DMM85 | Cdkn2a-/-_C57 | SIN.LV.SF | LIVER       | 17 | 21599348 | + | NM_009558    | Zfp51    | + |
| DMM82 | Cdkn2a-/-_C57 | SIN.LV.SF | LIVER       | 17 | 24224036 | - | NM_001080773 | Pdpc1    | - |
| DMM85 | Cdkn2a-/-_C57 | SIN.LV.SF | LIVER       | 17 | 25133883 | + | NM_020608    | Cramp11  | - |
| DMM85 | Cdkn2a-/-_C57 | SIN.LV.SF | LIVER       | 17 | 37558061 | + | NM_146511    | Olfr107  | + |
| DMM85 | Cdkn2a-/-_C57 | SIN.LV.SF | LIVER       | 17 | 46526111 | + | NM_021346    | Zfp318   | + |
| DMM85 | Cdkn2a-/-_C57 | SIN.LV.SF | LIVER       | 17 | 49575176 | + | NM_020042    | Mocs1    | + |
| DMM85 | Cdkn2a-/-_C57 | SIN.LV.SF | LIVER       | 17 | 50991863 | + | NM_028162    | Tbc1d5   | - |
| DMM82 | Cdkn2a-/-_C57 | SIN.LV.SF | LIVER       | 17 | 51234923 | - | NM_028162    | Tbc1d5   | - |
| DMM85 | Cdkn2a-/-_C57 | SIN.LV.SF | VER - SPLEE | 17 | 64272913 | + | NM_001037997 | Fert2    | + |
| DMM85 | Cdkn2a-/-_C57 | SIN.LV.SF | LIVER       | 17 | 64641679 | + | NM_001025309 | Pja2     | - |
| DMM86 | Cdkn2a-/-_C57 | SIN.LV.SF | LIVER       | 17 | 66285207 | - | NM_023053    | Twsg1    | - |
| DMM85 | Cdkn2a-/-_C57 | SIN.LV.SF | LIVER       | 17 | 68562999 | - | NM_177278    | L3mbtl4  | + |
| DMM85 | Cdkn2a-/-_C57 | SIN.LV.SF | LIVER       | 17 | 69434674 | + | NM_013813    | Epb4.113 | + |
| DMM80 | Cdkn2a-/-_C57 | SIN.LV.SF | LIVER       | 17 | 70422441 | - | NM_027712    | Dlgap1   | + |

|       |               |           |             |    |          |   |              |          |   |
|-------|---------------|-----------|-------------|----|----------|---|--------------|----------|---|
| DMM85 | Cdkn2a-/-_C57 | SIN.LV.SF | LIVER       | 17 | 73193277 | - | NM_027166    | Ypel5    | + |
| DMM85 | Cdkn2a-/-_C57 | SIN.LV.SF | LIVER       | 17 | 75019237 | - | NM_007566    | Birc6    | + |
| DMM85 | Cdkn2a-/-_C57 | SIN.LV.SF | LIVER       | 17 | 78637664 | - | NM_015800    | Crim1    | + |
| DMM85 | Cdkn2a-/-_C57 | SIN.LV.SF | LIVER       | 17 | 78710855 | - | NM_015800    | Crim1    | + |
| DMM85 | Cdkn2a-/-_C57 | SIN.LV.SF | LIVER       | 17 | 78799129 | + | NM_199448    | Fez2     | - |
| DMM80 | Cdkn2a-/-_C57 | SIN.LV.SF | LIVER       | 17 | 79141140 | + | NM_011500    | Strn     | - |
| DMM85 | Cdkn2a-/-_C57 | SIN.LV.SF | LIVER       | 17 | 84064670 | - | NM_153512    | Kcng3    | - |
| DMM85 | Cdkn2a-/-_C57 | SIN.LV.SF | LIVER       | 17 | 84614442 | + | NM_001001806 | Zfp3612  | - |
| DMM85 | Cdkn2a-/-_C57 | SIN.LV.SF | LIVER       | 17 | 88461247 | - | NM_001081034 | Fbxo11   | - |
| DMM85 | Cdkn2a-/-_C57 | SIN.LV.SF | LIVER       | 17 | 88874603 | + | NM_180974    | Foxn2    | + |
| DMM85 | Cdkn2a-/-_C57 | SIN.LV.SF | LIVER       | 17 | 91674431 | + | NM_020252    | Nrxn1    | - |
| DMM85 | Cdkn2a-/-_C57 | SIN.LV.SF | LIVER       | 18 | 4333460  | + | NM_007746    | Map3k8   | - |
| DMM87 | Cdkn2a-/-_C57 | SIN.LV.SF | LIVER       | 18 | 7350773  | + | NM_001081287 | Mpp7     | - |
| DMM82 | Cdkn2a-/-_C57 | SIN.LV.SF | SPLEEN      | 18 | 17411286 | + | NM_007664    | Cdh2     | - |
| DMM85 | Cdkn2a-/-_C57 | SIN.LV.SF | LIVER       | 18 | 17801993 | + | NM_007664    | Cdh2     | - |
| DMM85 | Cdkn2a-/-_C57 | SIN.LV.SF | LIVER       | 18 | 25478317 | + | NM_001033532 | AW554918 | + |
| DMM85 | Cdkn2a-/-_C57 | SIN.LV.SF | LIVER       | 18 | 25612210 | + | NM_001033532 | AW554918 | + |
| DMM87 | Cdkn2a-/-_C57 | SIN.LV.SF | LIVER       | 18 | 30453491 | + | NM_181414    | Pik3c3   | + |
| DMM85 | Cdkn2a-/-_C57 | SIN.LV.SF | LIVER       | 18 | 30467651 | - | NM_181414    | Pik3c3   | + |
| DMM85 | Cdkn2a-/-_C57 | SIN.LV.SF | LIVER       | 18 | 35523088 | - | NM_030749    | Sill     | - |
| DMM80 | Cdkn2a-/-_C57 | SIN.LV.SF | LIVER       | 18 | 39898237 | + | NM_011033    | Pabpc2   | + |
| DMM80 | Cdkn2a-/-_C57 | SIN.LV.SF | VER - SPLEE | 18 | 39898425 | - | NM_011033    | Pabpc2   | + |
| DMM87 | Cdkn2a-/-_C57 | SIN.LV.SF | SPLEEN      | 18 | 44952302 | + | NM_001085373 | Mcc      | - |
| DMM86 | Cdkn2a-/-_C57 | SIN.LV.SF | LIVER       | 18 | 45047929 | - | NM_001085373 | Mcc      | - |
| DMM82 | Cdkn2a-/-_C57 | SIN.LV.SF | LIVER       | 18 | 46931427 | - | NM_009681    | Ap3s1    | + |
| DMM82 | Cdkn2a-/-_C57 | SIN.LV.SF | VER - SPLEE | 18 | 47127635 | - | NM_178377    | Comm10   | + |
| DMM85 | Cdkn2a-/-_C57 | SIN.LV.SF | LIVER       | 18 | 47154482 | + | NM_178377    | Comm10   | + |
| DMM85 | Cdkn2a-/-_C57 | SIN.LV.SF | LIVER       | 18 | 47231722 | + | NM_178377    | Comm10   | + |
| DMM85 | Cdkn2a-/-_C57 | SIN.LV.SF | LIVER       | 18 | 53418685 | - | NM_029394    | Snx24    | + |
| DMM85 | Cdkn2a-/-_C57 | SIN.LV.SF | LIVER       | 18 | 53490776 | - | NM_029394    | Snx24    | + |
| DMM85 | Cdkn2a-/-_C57 | SIN.LV.SF | LIVER       | 18 | 54045075 | - | NM_152809    | Csnk1g3  | + |

|       |               |           |             |    |          |   |              |               |   |
|-------|---------------|-----------|-------------|----|----------|---|--------------|---------------|---|
| DMM85 | Cdkn2a-/-_C57 | SIN.LV.SF | LIVER       | 18 | 58078970 | - | NM_009194    | Slc12a2       | + |
| DMM82 | Cdkn2a-/-_C57 | SIN.LV.SF | VER - SPLEE | 18 | 58900954 | - | NM_025478    | Isoc1         | + |
| DMM85 | Cdkn2a-/-_C57 | SIN.LV.SF | LIVER       | 18 | 63942328 | + | NM_001014981 | Wdr7          | + |
| DMM86 | Cdkn2a-/-_C57 | SIN.LV.SF | VER - SPLEE | 18 | 67741153 | - | NM_194355    | Spire1        | - |
| DMM85 | Cdkn2a-/-_C57 | SIN.LV.SF | LIVER       | 18 | 67780225 | + | NM_001081073 | Cep76         | - |
| DMM85 | Cdkn2a-/-_C57 | SIN.LV.SF | LIVER       | 18 | 69637056 | - | NM_001083967 | Tcf4          | + |
| DMM86 | Cdkn2a-/-_C57 | SIN.LV.SF | LIVER       | 18 | 69672359 | + | NM_001083967 | Tcf4          | + |
| DMM85 | Cdkn2a-/-_C57 | SIN.LV.SF | SPLEEN      | 18 | 69679251 | + | NM_001083967 | Tcf4          | + |
| DMM86 | Cdkn2a-/-_C57 | SIN.LV.SF | SPLEEN      | 18 | 69682543 | + | NM_001083967 | Tcf4          | + |
| DMM86 | Cdkn2a-/-_C57 | SIN.LV.SF | VER - SPLEE | 18 | 69682874 | - | NM_001083967 | Tcf4          | + |
| DMM85 | Cdkn2a-/-_C57 | SIN.LV.SF | LIVER       | 18 | 69755265 | + | NM_001083967 | Tcf4          | + |
| DMM82 | Cdkn2a-/-_C57 | SIN.LV.SF | SPLEEN      | 18 | 75813018 | - | NM_201354    | Gm672         | - |
| DMM85 | Cdkn2a-/-_C57 | SIN.LV.SF | LIVER       | 18 | 77904854 | - | NM_178670    | 8030462N17Rik | - |
| DMM85 | Cdkn2a-/-_C57 | SIN.LV.SF | LIVER       | 18 | 77910933 | + | NM_178670    | 8030462N17Rik | - |
| DMM85 | Cdkn2a-/-_C57 | SIN.LV.SF | LIVER       | 19 | 7401065  | - | NM_001080388 | Mark2         | - |
| DMM85 | Cdkn2a-/-_C57 | SIN.LV.SF | LIVER       | 19 | 9071169  | + | NM_001039959 | Ahnak         | + |
| DMM85 | Cdkn2a-/-_C57 | SIN.LV.SF | LIVER       | 19 | 14602365 | - | NM_011600    | Tle4          | - |
| DMM85 | Cdkn2a-/-_C57 | SIN.LV.SF | LIVER       | 19 | 14665419 | - | NM_011600    | Tle4          | - |
| DMM82 | Cdkn2a-/-_C57 | SIN.LV.SF | LIVER       | 19 | 16266311 | + | NM_008139    | Gnaq          | + |
| DMM85 | Cdkn2a-/-_C57 | SIN.LV.SF | LIVER       | 19 | 18442732 | + | NM_017375    | Ostf1         | - |
| DMM87 | Cdkn2a-/-_C57 | SIN.LV.SF | SPLEEN      | 19 | 21728895 | + | NM_146096    | Fam108b       | + |
| DMM82 | Cdkn2a-/-_C57 | SIN.LV.SF | LIVER       | 19 | 23425157 | - | NM_174857    | Mamdc2        | - |
| DMM85 | Cdkn2a-/-_C57 | SIN.LV.SF | LIVER       | 19 | 26797496 | + | NM_011416    | Smarca2       | + |
| DMM85 | Cdkn2a-/-_C57 | SIN.LV.SF | LIVER       | 19 | 27859342 | - | NM_011265    | Rfx3          | - |
| DMM85 | Cdkn2a-/-_C57 | SIN.LV.SF | LIVER       | 19 | 29076097 | + | NM_025950    | Cdc371l       | + |
| DMM85 | Cdkn2a-/-_C57 | SIN.LV.SF | LIVER       | 19 | 29804856 | - | NM_172836    | 9930021J03Rik | - |
| DMM82 | Cdkn2a-/-_C57 | SIN.LV.SF | LIVER       | 19 | 31950118 | + | NM_001081074 | A1cf          | + |
| DMM85 | Cdkn2a-/-_C57 | SIN.LV.SF | LIVER       | 19 | 32257934 | - | NM_144792    | Sgms1         | - |
| DMM85 | Cdkn2a-/-_C57 | SIN.LV.SF | LIVER       | 19 | 32318536 | - | NM_144792    | Sgms1         | - |
| DMM85 | Cdkn2a-/-_C57 | SIN.LV.SF | LIVER       | 19 | 32874481 | + | NM_008960    | Pten          | + |
| DMM87 | Cdkn2a-/-_C57 | SIN.LV.SF | LIVER       | 19 | 36173340 | + | NM_019428    | Rpp30         | + |

|       |               |           |             |    |          |   |              |               |   |
|-------|---------------|-----------|-------------|----|----------|---|--------------|---------------|---|
| DMM85 | Cdkn2a-/-_C57 | SIN.LV.SF | LIVER       | 19 | 36494684 | - | NM_029508    | Pcgf5         | + |
| DMM86 | Cdkn2a-/-_C57 | SIN.LV.SF | VER - SPLEE | 19 | 36514423 | + | NM_029508    | Pcgf5         | + |
| DMM86 | Cdkn2a-/-_C57 | SIN.LV.SF | LIVER       | 19 | 36514619 | - | NM_029508    | Pcgf5         | + |
| DMM86 | Cdkn2a-/-_C57 | SIN.LV.SF | LIVER       | 19 | 36514640 | - | NM_029508    | Pcgf5         | + |
| DMM85 | Cdkn2a-/-_C57 | SIN.LV.SF | LIVER       | 19 | 38006457 | - | NM_001099634 | Myof          | - |
| DMM85 | Cdkn2a-/-_C57 | SIN.LV.SF | LIVER       | 19 | 38991364 | - | NM_145952    | Tbc1d12       | + |
| DMM85 | Cdkn2a-/-_C57 | SIN.LV.SF | LIVER       | 19 | 47022188 | + | NM_029810    | Nt5c2         | - |
| DMM85 | Cdkn2a-/-_C57 | SIN.LV.SF | LIVER       | 19 | 51208424 | - | NM_021377    | Sorcs1        | - |
| DMM84 | Cdkn2a-/-_C57 | SIN.LV.SF | LIVER       | 19 | 54077461 | - | NM_019658    | Shoc2         | + |
| DMM85 | Cdkn2a-/-_C57 | SIN.LV.SF | SPLEEN      | 19 | 55472442 | + | NM_016862    | Vti1a         | + |
| DMM84 | Cdkn2a-/-_C57 | SIN.LV.SF | LIVER       | 19 | 57771902 | - | NM_181415    | Atrnl1        | + |
| DMM84 | Cdkn2a-/-_C57 | SIN.LV.SF | VER - SPLEE | X  | 6012989  | + | NM_001040459 | Shroom4       | + |
| DMM85 | Cdkn2a-/-_C57 | SIN.LV.SF | LIVER       | X  | 7827303  | - | NM_133991    | Ftsj1         | - |
| DMM85 | Cdkn2a-/-_C57 | SIN.LV.SF | LIVER       | X  | 9031495  | + | NM_007807    | Cybb          | - |
| DMM85 | Cdkn2a-/-_C57 | SIN.LV.SF | LIVER       | X  | 14468999 | + | NM_026128    | 4930403L05Rik | - |
| DMM85 | Cdkn2a-/-_C57 | SIN.LV.SF | LIVER       | X  | 14483844 | - | NM_026128    | 4930403L05Rik | - |
| DMM82 | Cdkn2a-/-_C57 | SIN.LV.SF | LIVER       | X  | 14486487 | - | NM_026128    | 4930403L05Rik | - |
| DMM85 | Cdkn2a-/-_C57 | SIN.LV.SF | LIVER       | X  | 17783737 | + | NM_009483    | Kdm6a         | + |
| DMM80 | Cdkn2a-/-_C57 | SIN.LV.SF | VER - SPLEE | X  | 17808653 | - | NM_009483    | Kdm6a         | + |
| DMM86 | Cdkn2a-/-_C57 | SIN.LV.SF | VER - SPLEE | X  | 23336470 | - | NM_175180    | Wdr44         | + |
| DMM85 | Cdkn2a-/-_C57 | SIN.LV.SF | LIVER       | X  | 23344134 | - | NM_175180    | Wdr44         | + |
| DMM85 | Cdkn2a-/-_C57 | SIN.LV.SF | VER - SPLEE | X  | 23991335 | + | NM_001100444 | Gm5934        | - |
| DMM85 | Cdkn2a-/-_C57 | SIN.LV.SF | LIVER       | X  | 35891680 | + | NM_001110142 | Cul4b         | - |
| DMM85 | Cdkn2a-/-_C57 | SIN.LV.SF | LIVER       | X  | 35951524 | - | NM_026902    | Mcts1         | + |
| DMM84 | Cdkn2a-/-_C57 | SIN.LV.SF | VER - SPLEE | X  | 37369246 | - | NM_183126    | 6030498E09Rik | + |
| DMM86 | Cdkn2a-/-_C57 | SIN.LV.SF | VER - SPLEE | X  | 38114984 | - | NM_016886    | Gria3         | + |
| DMM85 | Cdkn2a-/-_C57 | SIN.LV.SF | LIVER       | X  | 39546589 | - | NM_021465    | Stag2         | + |
| DMM85 | Cdkn2a-/-_C57 | SIN.LV.SF | LIVER       | X  | 42126689 | - | NM_178739    | Wdr40b        | - |
| DMM85 | Cdkn2a-/-_C57 | SIN.LV.SF | LIVER       | X  | 43919064 | + | NM_001085510 | Gm4987        | - |
| DMM85 | Cdkn2a-/-_C57 | SIN.LV.SF | LIVER       | X  | 45290993 | + | NM_177215    | Ocr1          | + |
| DMM85 | Cdkn2a-/-_C57 | SIN.LV.SF | LIVER       | X  | 57496176 | + | NM_001001798 | Atp11c        | - |



|       |                 |           |              |   |           |   |              |                    |   |
|-------|-----------------|-----------|--------------|---|-----------|---|--------------|--------------------|---|
| DMM85 | Cdkn2a-/-_C57   | SIN.LV.SF | LIVER        | X | 71254270  | - | NM_008363    | Irak1              | - |
| DMM85 | Cdkn2a-/-_C57   | SIN.LV.SF | LIVER        | X | 75011932  | - | NM_016979    | Prkx               | - |
| DMM80 | Cdkn2a-/-_C57   | SIN.LV.SF | LIVER        | X | 75763616  | + | NM_001126321 | OTTMUSG00000017864 | - |
| DMM87 | Cdkn2a-/-_C57   | SIN.LV.SF | LIVER        | X | 80873869  | + | NM_007868    | Dmd                | + |
| DMM84 | Cdkn2a-/-_C57   | SIN.LV.SF | LIVER        | X | 83396763  | + | NM_007430    | Nr0b1              | + |
| DMM87 | Cdkn2a-/-_C57   | SIN.LV.SF | SPLEEN       | X | 84460355  | - | NM_001160403 | Il1rap1l           | - |
| DMM80 | Cdkn2a-/-_C57   | SIN.LV.SF | LIVER        | X | 90824268  | + | NM_008892    | Pola1              | - |
| DMM85 | Cdkn2a-/-_C57   | SIN.LV.SF | LIVER        | X | 90892032  | - | NM_177546    | Pcyt1b             | + |
| DMM85 | Cdkn2a-/-_C57   | SIN.LV.SF | LIVER        | X | 91365809  | + | NM_001044386 | Zfx                | - |
| DMM84 | Cdkn2a-/-_C57   | SIN.LV.SF | LIVER        | X | 97914547  | + | NM_008446    | Kif4               | + |
| DMM85 | Cdkn2a-/-_C57   | SIN.LV.SF | LIVER        | X | 126290970 | - | NM_017398    | Diap2              | + |
| DMM82 | Cdkn2a-/-_C57   | SIN.LV.SF | VER - SPLEEN | X | 126388822 | - | NM_017398    | Diap2              | + |
| DMM86 | Cdkn2a-/-_C57   | SIN.LV.SF | LIVER        | X | 126398092 | + | NM_017398    | Diap2              | + |
| DMM85 | Cdkn2a-/-_C57   | SIN.LV.SF | LIVER        | X | 130527652 | - | NM_013757    | Sytl4              | - |
| DMM85 | Cdkn2a-/-_C57   | SIN.LV.SF | LIVER        | X | 135828173 | + | NM_011635    | Trap1a             | + |
| DMM85 | Cdkn2a-/-_C57   | SIN.LV.SF | LIVER        | X | 137088589 | + | NM_001077364 | Tsc22d3            | - |
| DMM84 | Cdkn2a-/-_C57   | SIN.LV.SF | LIVER        | X | 138826794 | - | NM_001033600 | Acsl4              | - |
| DMM84 | Cdkn2a-/-_C57   | SIN.LV.SF | LIVER        | X | 140839382 | - | NM_009428    | Trpc5              | - |
| DMM85 | Cdkn2a-/-_C57   | SIN.LV.SF | LIVER        | X | 156288971 | + | NM_001135728 | Sh3kbp1            | + |
| DMM86 | Cdkn2a-/-_C57   | SIN.LV.SF | LIVER        | X | 157210906 | + | NM_011302    | Rs1                | + |
| DMM86 | Cdkn2a-/-_C57   | SIN.LV.SF | VER - SPLEEN | X | 159454939 | + | NM_018737    | Ctps2              | + |
| DMM82 | Cdkn2a-/-_C57   | SIN.LV.SF | SPLEEN       | X | 160363420 | - | NM_026887    | Ap1s2              | + |
| DMM86 | Cdkn2a-/-_C57   | SIN.LV.SF | LIVER        | X | 161375327 | + | NM_029730    | Mospd2             | - |
| DMM85 | Cdkn2a-/-_C57   | SIN.LV.SF | LIVER        | X | 163385775 | + | NM_001101606 | Gm8817             | - |
| DMM82 | Cdkn2a-/-_C57   | SIN.LV.SF | VER - SPLEEN | Y | 504682    | - | NM_009484    | Uty                | - |
| DMM80 | Cdkn2a-/-_C57   | SIN.LV.SF | SPLEEN       | Y | 2856411   | + | NM_011253    | Rbmyl1a1           | + |
| DMM80 | Cdkn2a-/-_C57   | SIN.LV.SF | LIVER        | Y | 2856440   | - | NM_011253    | Rbmyl1a1           | + |
| DM130 | Cdkn2a-/-_C57   | LV.SF.LTR | LIVER        | 1 | 4880959   | - | NM_001159750 | Tcea1              | + |
| DM129 | Cdkn2a-/-_C57   | LV.SF.LTR | LIVER        | 1 | 5133655   | - | NM_133826    | Atp6v1h            | + |
| DM65  | Cdkn2a-/-_C57   | LV.SF.LTR | LIVER        | 1 | 6247618   | + | NM_009826    | Rb1cc1             | + |
| DM119 | Cdkn2a-/-_IFNAR | LV.SF.LTR | LIVER        | 1 | 6247728   | - | NM_009826    | Rb1cc1             | + |

|       |                 |           |             |   |          |   |              |               |   |
|-------|-----------------|-----------|-------------|---|----------|---|--------------|---------------|---|
| DM131 | Cdkn2a-/-_C57   | LV.SF.LTR | LIVER       | 1 | 7094401  | - | NM_183028    | Pcmd1         | + |
| DM129 | Cdkn2a-/-_C57   | LV.SF.LTR | LIVER       | 1 | 7399788  | + | NM_183028    | Pcmd1         | + |
| M23   | Cdkn2a-/-_IFNAR | LV.SF.LTR | LIVER       | 1 | 10056770 | - | NM_026493    | Cspp1         | + |
| DM56  | Cdkn2a-/-_IFNAR | LV.SF.LTR | VER - SPLEE | 1 | 10143901 | + | NM_001102430 | Arfgef1       | - |
| DM66  | Cdkn2a-/-_C57   | LV.SF.LTR | LIVER       | 1 | 13003328 | + | NM_172841    | Slco5a1       | - |
| DM45  | Cdkn2a-/-_IFNAR | LV.SF.LTR | LIVER       | 1 | 13264973 | + | NM_001077695 | Ncoa2         | - |
| DM129 | Cdkn2a-/-_C57   | LV.SF.LTR | LIVER       | 1 | 13831957 | - | NR_004447    | EG433273      | - |
| DM67  | Cdkn2a-/-_C57   | LV.SF.LTR | LIVER       | 1 | 23277570 | - | NM_001081079 | Ogfr1         | - |
| DM56  | Cdkn2a-/-_IFNAR | LV.SF.LTR | LIVER       | 1 | 23457821 | + | NM_001081079 | Ogfr1         | - |
| DM66  | Cdkn2a-/-_C57   | LV.SF.LTR | LIVER       | 1 | 23916146 | - | NM_028534    | Smap1         | - |
| DM56  | Cdkn2a-/-_IFNAR | LV.SF.LTR | VER - SPLEE | 1 | 24061702 | + | NM_026604    | Fam135a       | - |
| DM67  | Cdkn2a-/-_C57   | LV.SF.LTR | LIVER       | 1 | 24490541 | - | NM_007733    | Col19a1       | - |
| DM40  | Cdkn2a-/-_IFNAR | LV.SF.LTR | LIVER       | 1 | 34038558 | - | NM_133833    | Dst           | + |
| DM53  | Cdkn2a-/-_IFNAR | LV.SF.LTR | LIVER       | 1 | 38137296 | + | NM_019570    | Rev1          | - |
| DM46  | Cdkn2a-/-_IFNAR | LV.SF.LTR | LIVER       | 1 | 46913767 | - | NM_172653    | Slc39a10      | - |
| DM35  | Cdkn2a-/-_FVB   | LV.SF.LTR | VER - SPLEE | 1 | 47738858 | - | NM_172653    | Slc39a10      | - |
| DM56  | Cdkn2a-/-_IFNAR | LV.SF.LTR | VER - SPLEE | 1 | 48656686 | + | NM_172653    | Slc39a10      | - |
| DM67  | Cdkn2a-/-_C57   | LV.SF.LTR | LIVER       | 1 | 51561999 | - | NM_028696    | Obfc2a        | - |
| DM40  | Cdkn2a-/-_IFNAR | LV.SF.LTR | LIVER       | 1 | 53834457 | - | NM_133810    | Stk17b        | - |
| DM126 | Cdkn2a-/-_C57   | LV.SF.LTR | LIVER       | 1 | 55060777 | + | NM_031179    | Sf3b1         | - |
| DM54  | Cdkn2a-/-_IFNAR | LV.SF.LTR | LIVER       | 1 | 56885041 | + | NM_139146    | Satb2         | - |
| DM67  | Cdkn2a-/-_C57   | LV.SF.LTR | LIVER       | 1 | 56995058 | + | NM_139146    | Satb2         | - |
| DM129 | Cdkn2a-/-_C57   | LV.SF.LTR | LIVER       | 1 | 57000862 | + | NM_139146    | Satb2         | - |
| DM131 | Cdkn2a-/-_C57   | LV.SF.LTR | LIVER       | 1 | 57452536 | + | NM_001114102 | 1110034B05Rik | - |
| DM67  | Cdkn2a-/-_C57   | LV.SF.LTR | LIVER       | 1 | 60957164 | + | NM_009843    | Ctla4         | + |
| DM128 | Cdkn2a-/-_C57   | LV.SF.LTR | LIVER       | 1 | 63048054 | + | NM_001081436 | Ino80d        | - |
| M207  | Cdkn2a-/-_IFNAR | LV.SF.LTR | LIVER       | 1 | 64411603 | - | NM_001037726 | Creb1         | + |
| DM67  | Cdkn2a-/-_C57   | LV.SF.LTR | LIVER       | 1 | 65317527 | + | NM_011086    | Pikfyve       | + |
| DM65  | Cdkn2a-/-_C57   | LV.SF.LTR | LIVER       | 1 | 66775246 | + | NM_001122738 | 1110028C15Rik | - |
| DM131 | Cdkn2a-/-_C57   | LV.SF.LTR | LIVER       | 1 | 67446605 | + | NM_001080809 | Cps1          | + |
| DM129 | Cdkn2a-/-_C57   | LV.SF.LTR | LIVER       | 1 | 71119459 | + | NM_007525    | Bard1         | - |

|       |                 |           |             |   |           |   |              |               |   |
|-------|-----------------|-----------|-------------|---|-----------|---|--------------|---------------|---|
| DM67  | Cdkn2a-/-_C57   | LV.SF.LTR | VER - SPLEE | 1 | 71142948  | - | NM_007525    | Bard1         | - |
| DM131 | Cdkn2a-/-_C57   | LV.SF.LTR | LIVER       | 1 | 72654410  | - | NM_018817    | Smarcal1      | + |
| DM51  | Cdkn2a-/-_IFNAR | LV.SF.LTR | LIVER       | 1 | 73383367  | + | NR_003202    | Pinc          | - |
| DM67  | Cdkn2a-/-_C57   | LV.SF.LTR | SPLEEN      | 1 | 77826534  | + | NM_001159520 | Pax3          | - |
| DM40  | Cdkn2a-/-_IFNAR | LV.SF.LTR | LIVER       | 1 | 80305890  | - | NM_016716    | Cul3          | - |
| DM37  | Cdkn2a-/-_IFNAR | LV.SF.LTR | LIVER       | 1 | 80527066  | + | NM_175291    | Dock10        | - |
| DM33  | Cdkn2a-/-_FVB   | LV.SF.LTR | LIVER       | 1 | 80597500  | - | NM_175291    | Dock10        | - |
| DM67  | Cdkn2a-/-_C57   | LV.SF.LTR | LIVER       | 1 | 80622616  | + | NM_175291    | Dock10        | - |
| DM67  | Cdkn2a-/-_C57   | LV.SF.LTR | LIVER       | 1 | 82735981  | - | NM_029409    | Mff           | + |
| DM131 | Cdkn2a-/-_C57   | LV.SF.LTR | LIVER       | 1 | 90124726  | + | NM_013701    | Ugt1a2        | + |
| DM67  | Cdkn2a-/-_C57   | LV.SF.LTR | LIVER       | 1 | 90163103  | + | NM_172505    | A730008H23Rik | - |
| DM56  | Cdkn2a-/-_IFNAR | LV.SF.LTR | VER - SPLEE | 1 | 90170403  | + | NM_198652    | 6430706D22Rik | - |
| DM56  | Cdkn2a-/-_IFNAR | LV.SF.LTR | VER - SPLEE | 1 | 95355030  | - | NM_133808    | Hdlbp         | - |
| DM128 | Cdkn2a-/-_C57   | LV.SF.LTR | LIVER       | 1 | 97152062  | + | NM_026321    | Fam174a       | + |
| DM45  | Cdkn2a-/-_IFNAR | LV.SF.LTR | LIVER       | 1 | 97486056  | - | NM_009183    | St8sia4       | - |
| DM128 | Cdkn2a-/-_C57   | LV.SF.LTR | LIVER       | 1 | 97519504  | + | NM_009183    | St8sia4       | - |
| DM129 | Cdkn2a-/-_C57   | LV.SF.LTR | LIVER       | 1 | 107492049 | - | NM_013784    | Pign          | - |
| DM67  | Cdkn2a-/-_C57   | LV.SF.LTR | LIVER       | 1 | 108277577 | - | NM_009741    | Bcl2          | - |
| DM129 | Cdkn2a-/-_C57   | LV.SF.LTR | LIVER       | 1 | 108601033 | - | NM_009741    | Bcl2          | - |
| DM40  | Cdkn2a-/-_IFNAR | LV.SF.LTR | LIVER       | 1 | 113757033 | - | NM_001081316 | Dsel          | - |
| DM130 | Cdkn2a-/-_C57   | LV.SF.LTR | LIVER       | 1 | 113758860 | + | NM_001081316 | Dsel          | - |
| DM67  | Cdkn2a-/-_C57   | LV.SF.LTR | LIVER       | 1 | 116761109 | - | NM_001077425 | Cntnap5a      | + |
| DM131 | Cdkn2a-/-_C57   | LV.SF.LTR | LIVER       | 1 | 121526955 | + | NM_001113416 | Epb4.115      | - |
| DM119 | Cdkn2a-/-_IFNAR | LV.SF.LTR | LIVER       | 1 | 121598694 | - | NM_019933    | Ptpn4         | - |
| DM43  | Cdkn2a-/-_IFNAR | LV.SF.LTR | VER - SPLEE | 1 | 129220644 | - | NM_145128    | Mgat5         | + |
| DM128 | Cdkn2a-/-_C57   | LV.SF.LTR | LIVER       | 1 | 133816443 | + | NM_001145804 | Nucks1        | + |
| DM46  | Cdkn2a-/-_IFNAR | LV.SF.LTR | LIVER       | 1 | 139811445 | + | NM_001111316 | Ptpnc         | - |
| DM67  | Cdkn2a-/-_C57   | LV.SF.LTR | VER - SPLEE | 1 | 139819395 | - | NM_001111316 | Ptpnc         | - |
| DM65  | Cdkn2a-/-_C57   | LV.SF.LTR | LIVER       | 1 | 139860428 | - | NM_001111316 | Ptpnc         | - |
| DM56  | Cdkn2a-/-_IFNAR | LV.SF.LTR | VER - SPLEE | 1 | 140066304 | - | NM_001111316 | Ptpnc         | - |
| DM53  | Cdkn2a-/-_IFNAR | LV.SF.LTR | LIVER       | 1 | 140502351 | + | NM_021605    | Nek7          | - |

|       |                |           |              |   |           |   |              |               |   |
|-------|----------------|-----------|--------------|---|-----------|---|--------------|---------------|---|
| DM43  | Cdkn2a-/_IFNAR | LV.SF.LTR | LIVER        | 1 | 140987566 | + | NM_181347    | Dennd1b       | + |
| DM65  | Cdkn2a-/_C57   | LV.SF.LTR | LIVER        | 1 | 141057416 | - | NM_181347    | Dennd1b       | + |
| DM45  | Cdkn2a-/_IFNAR | LV.SF.LTR | LIVER        | 1 | 141334861 | - | NM_172643    | Zbtb41        | + |
| DM130 | Cdkn2a-/_C57   | LV.SF.LTR | LIVER        | 1 | 142152843 | + | NM_001081027 | Kcnt2         | + |
| DM67  | Cdkn2a-/_C57   | LV.SF.LTR | SPLEEN       | 1 | 145825030 | + | NM_009061    | Rgs2          | - |
| DM54  | Cdkn2a-/_IFNAR | LV.SF.LTR | LIVER        | 1 | 146225213 | - | NM_015811    | Rgs1          | - |
| DM46  | Cdkn2a-/_IFNAR | LV.SF.LTR | LIVER        | 1 | 150790804 | - | NM_008869    | Pla2g4a       | - |
| DM56  | Cdkn2a-/_IFNAR | LV.SF.LTR | SPLEEN       | 1 | 150790945 | - | NM_008869    | Pla2g4a       | - |
| DM40  | Cdkn2a-/_IFNAR | LV.SF.LTR | LIVER        | 1 | 153110777 | - | NM_001039511 | Ivns1abp      | + |
| DM131 | Cdkn2a-/_C57   | LV.SF.LTR | LIVER        | 1 | 154730265 | - | NM_001005507 | Smg7          | - |
| DM65  | Cdkn2a-/_C57   | LV.SF.LTR | LIVER        | 1 | 157788669 | - | NM_001160018 | Tor1aip1      | - |
| DM51  | Cdkn2a-/_IFNAR | LV.SF.LTR | LIVER        | 1 | 159265298 | - | NM_177644    | Rasa12        | - |
| DM67  | Cdkn2a-/_C57   | LV.SF.LTR | SPLEEN       | 1 | 161149315 | - | NM_011931    | Rfwd2         | + |
| DM55  | Cdkn2a-/_IFNAR | LV.SF.LTR | VER - SPLEEN | 1 | 163382558 | + | NM_009452    | Tnfsf4        | + |
| DM56  | Cdkn2a-/_IFNAR | LV.SF.LTR | VER - SPLEEN | 1 | 165743394 | + | NM_010629    | Kifap3        | + |
| DM67  | Cdkn2a-/_C57   | LV.SF.LTR | SPLEEN       | 1 | 165912808 | - | NM_201364    | BC055324      | - |
| DM56  | Cdkn2a-/_IFNAR | LV.SF.LTR | VER - SPLEEN | 1 | 166496461 | - | NM_009721    | Atp1b1        | - |
| DM130 | Cdkn2a-/_C57   | LV.SF.LTR | LIVER        | 1 | 167350035 | - | NM_027430    | Brp44         | + |
| DM46  | Cdkn2a-/_IFNAR | LV.SF.LTR | LIVER        | 1 | 170309101 | + | NM_008783    | Pbx1          | - |
| DM33  | Cdkn2a-/_FVB   | LV.SF.LTR | LIVER        | 1 | 171307493 | + | NM_023284    | Nuf2          | - |
| DM53  | Cdkn2a-/_IFNAR | LV.SF.LTR | LIVER        | 1 | 171887012 | - | NM_010476    | Hsd17b7       | - |
| DM67  | Cdkn2a-/_C57   | LV.SF.LTR | LIVER        | 1 | 178832773 | - | NM_029756    | Sdccag8       | + |
| DM40  | Cdkn2a-/_IFNAR | LV.SF.LTR | LIVER        | 1 | 178986060 | - | NM_011785    | Akt3          | - |
| DM45  | Cdkn2a-/_IFNAR | LV.SF.LTR | LIVER        | 1 | 179011088 | - | NM_011785    | Akt3          | - |
| DM131 | Cdkn2a-/_C57   | LV.SF.LTR | LIVER        | 1 | 179080036 | + | NM_011785    | Akt3          | - |
| DM68  | Cdkn2a-/_C57   | LV.SF.LTR | SPLEEN       | 1 | 181373907 | - | NM_027188    | Smyd3         | - |
| DM128 | Cdkn2a-/_C57   | LV.SF.LTR | LIVER        | 1 | 189038357 | - | NM_028848    | Spata17       | - |
| DM51  | Cdkn2a-/_IFNAR | LV.SF.LTR | LIVER        | 1 | 191464944 | + | NM_001081363 | Cenpf         | - |
| DM129 | Cdkn2a-/_C57   | LV.SF.LTR | LIVER        | 1 | 192868355 | - | NR_027298    | A230020J21Rik | + |
| DM126 | Cdkn2a-/_C57   | LV.SF.LTR | LIVER        | 1 | 193153960 | + | NM_025864    | Tmem206       | + |
| DM40  | Cdkn2a-/_IFNAR | LV.SF.LTR | LIVER        | 2 | 18153958  | - | NM_007869    | Dnajc1        | - |

|       |                 |           |             |   |          |   |              |               |   |
|-------|-----------------|-----------|-------------|---|----------|---|--------------|---------------|---|
| DM51  | Cdkn2a-/-_IFNAR | LV.SF.LTR | LIVER       | 2 | 19553321 | + | NM_027600    | 4921504E06Rik | - |
| DM37  | Cdkn2a-/-_IFNAR | LV.SF.LTR | LIVER       | 2 | 23834377 | - | NM_080462    | Hnmt          | - |
| DM53  | Cdkn2a-/-_IFNAR | LV.SF.LTR | LIVER       | 2 | 24186440 | + | NM_031167    | Illrn         | + |
| DM128 | Cdkn2a-/-_C57   | LV.SF.LTR | LIVER       | 2 | 37218548 | + | NM_026176    | Pdcl          | - |
| DM67  | Cdkn2a-/-_C57   | LV.SF.LTR | LIVER       | 2 | 37399968 | + | NM_001033960 | Rabgap1       | + |
| DM129 | Cdkn2a-/-_C57   | LV.SF.LTR | LIVER       | 2 | 37463817 | + | NM_009261    | Strbp         | - |
| M206  | Cdkn2a-/-_IFNAR | LV.SF.LTR | LIVER       | 2 | 38641644 | - | NM_010264    | Nr6a1         | - |
| DM40  | Cdkn2a-/-_IFNAR | LV.SF.LTR | LIVER       | 2 | 38683244 | + | NM_010264    | Nr6a1         | - |
| DM128 | Cdkn2a-/-_C57   | LV.SF.LTR | LIVER       | 2 | 44902512 | + | NM_015753    | Zeb2          | - |
| DM130 | Cdkn2a-/-_C57   | LV.SF.LTR | LIVER       | 2 | 46193028 | + | NM_015753    | Zeb2          | - |
| DM129 | Cdkn2a-/-_C57   | LV.SF.LTR | LIVER       | 2 | 48813637 | + | NM_029924    | Mbd5          | + |
| DM67  | Cdkn2a-/-_C57   | LV.SF.LTR | SPLEEN      | 2 | 48828735 | - | NM_029924    | Mbd5          | + |
| DM31  | Cdkn2a-/-_FVB   | LV.SF.LTR | LIVER       | 2 | 48984276 | - | NM_029924    | Mbd5          | + |
| DM54  | Cdkn2a-/-_IFNAR | LV.SF.LTR | LIVER       | 2 | 49030506 | + | NM_029924    | Mbd5          | + |
| DM51  | Cdkn2a-/-_IFNAR | LV.SF.LTR | LIVER       | 2 | 51203297 | + | NM_028810    | Rnd3          | - |
| DM129 | Cdkn2a-/-_C57   | LV.SF.LTR | LIVER       | 2 | 51824996 | + | NM_001141948 | Nmi           | - |
| DM65  | Cdkn2a-/-_C57   | LV.SF.LTR | LIVER       | 2 | 53047238 | - | NM_018785    | Prpf40a       | - |
| DM40  | Cdkn2a-/-_IFNAR | LV.SF.LTR | LIVER       | 2 | 61419036 | + | NM_011529    | Tank          | + |
| DM40  | Cdkn2a-/-_IFNAR | LV.SF.LTR | LIVER       | 2 | 65227203 | - | NM_177074    | Slc38a11      | - |
| DM128 | Cdkn2a-/-_C57   | LV.SF.LTR | LIVER       | 2 | 71098704 | + | NM_010064    | Dync1i2       | + |
| DM128 | Cdkn2a-/-_C57   | LV.SF.LTR | LIVER       | 2 | 71247392 | + | NM_026115    | Hat1          | + |
| DM55  | Cdkn2a-/-_IFNAR | LV.SF.LTR | VER - SPLEE | 2 | 72009058 | - | NM_019688    | Rapgef4       | + |
| DM129 | Cdkn2a-/-_C57   | LV.SF.LTR | LIVER       | 2 | 72981029 | + | NM_030091    | Ola1          | - |
| DM29  | Cdkn2a-/-_FVB   | LV.SF.LTR | LIVER       | 2 | 73047612 | + | NM_025942    | Ola1          | - |
| DM129 | Cdkn2a-/-_C57   | LV.SF.LTR | LIVER       | 2 | 73431968 | + | NM_007389    | Chrna1        | - |
| DM129 | Cdkn2a-/-_C57   | LV.SF.LTR | LIVER       | 2 | 77031180 | + | NM_175465    | Sestd1        | - |
| DM65  | Cdkn2a-/-_C57   | LV.SF.LTR | LIVER       | 2 | 78735258 | - | NM_009454    | Ube2e3        | + |
| DM68  | Cdkn2a-/-_C57   | LV.SF.LTR | SPLEEN      | 2 | 79479504 | + | NM_080558    | Ssfa2         | + |
| DM67  | Cdkn2a-/-_C57   | LV.SF.LTR | VER - SPLEE | 2 | 80166852 | - | NM_024181    | Dnajc10       | + |
| DM129 | Cdkn2a-/-_C57   | LV.SF.LTR | LIVER       | 2 | 84086223 | + | NM_018782    | Calcl1        | - |
| DM40  | Cdkn2a-/-_IFNAR | LV.SF.LTR | LIVER       | 2 | 86446020 | + | NM_207564    | Olfir1083     | - |

|       |                 |           |             |   |           |   |              |               |   |
|-------|-----------------|-----------|-------------|---|-----------|---|--------------|---------------|---|
| DM128 | Cdkn2a-/-_C57   | LV.SF.LTR | LIVER       | 2 | 104452443 | + | NM_145529    | Cstf3         | + |
| DM35  | Cdkn2a-/-_FVB   | LV.SF.LTR | LIVER       | 2 | 108979615 | - | NM_029790    | Mett5d1       | - |
| M203  | Cdkn2a-/-_IFNAR | LV.SF.LTR | LIVER       | 2 | 109098924 | - | NM_029790    | Mett5d1       | - |
| DM65  | Cdkn2a-/-_C57   | LV.SF.LTR | LIVER       | 2 | 109137866 | - | NM_139303    | Kif18a        | + |
| DM56  | Cdkn2a-/-_IFNAR | LV.SF.LTR | VER - SPLEE | 2 | 109164148 | - | NM_139303    | Kif18a        | + |
| DM45  | Cdkn2a-/-_IFNAR | LV.SF.LTR | LIVER       | 2 | 112226143 | - | NM_024254    | 2410042D21Rik | + |
| DM129 | Cdkn2a-/-_C57   | LV.SF.LTR | LIVER       | 2 | 112229343 | + | NM_024254    | 2410042D21Rik | + |
| DM40  | Cdkn2a-/-_IFNAR | LV.SF.LTR | LIVER       | 2 | 112252096 | + | NM_024254    | 2410042D21Rik | + |
| DM65  | Cdkn2a-/-_C57   | LV.SF.LTR | LIVER       | 2 | 112299861 | + | NM_133749    | 2900064A13Rik | + |
| DM33  | Cdkn2a-/-_FVB   | LV.SF.LTR | LIVER       | 2 | 114450549 | - | NM_025675    | Atpbd4        | - |
| DM54  | Cdkn2a-/-_IFNAR | LV.SF.LTR | LIVER       | 2 | 114466116 | - | NM_025675    | Atpbd4        | - |
| DM126 | Cdkn2a-/-_C57   | LV.SF.LTR | LIVER       | 2 | 115525289 | + | NM_001145898 | BC052040      | + |
| DM130 | Cdkn2a-/-_C57   | LV.SF.LTR | LIVER       | 2 | 115601634 | + | NM_001145898 | BC052040      | + |
| DM130 | Cdkn2a-/-_C57   | LV.SF.LTR | LIVER       | 2 | 121867979 | - | NM_144545    | Eif3j         | + |
| DM129 | Cdkn2a-/-_C57   | LV.SF.LTR | LIVER       | 2 | 122066664 | - | NM_146126    | Sord          | + |
| DM126 | Cdkn2a-/-_C57   | LV.SF.LTR | LIVER       | 2 | 124614511 | + | NM_172537    | Sema6d        | + |
| DM126 | Cdkn2a-/-_C57   | LV.SF.LTR | LIVER       | 2 | 124615828 | + | NM_172537    | Sema6d        | + |
| DM130 | Cdkn2a-/-_C57   | LV.SF.LTR | LIVER       | 2 | 128465064 | - | NM_008569    | Anapc1        | - |
| DM43  | Cdkn2a-/-_IFNAR | LV.SF.LTR | VER - SPLEE | 2 | 130340527 | - | NM_008980    | Ptpa          | + |
| DM56  | Cdkn2a-/-_IFNAR | LV.SF.LTR | LIVER       | 2 | 132491680 | + | NM_028637    | 1110034G24Rik | + |
| DM128 | Cdkn2a-/-_C57   | LV.SF.LTR | LIVER       | 2 | 134467392 | + | NM_029148    | Tmx4          | - |
| DM129 | Cdkn2a-/-_C57   | LV.SF.LTR | LIVER       | 2 | 136882936 | + | NM_028834    | 2210009G21Rik | + |
| DM65  | Cdkn2a-/-_C57   | LV.SF.LTR | LIVER       | 2 | 139775830 | + | NM_001159640 | Tasp1         | - |
| DM131 | Cdkn2a-/-_C57   | LV.SF.LTR | LIVER       | 2 | 139958878 | - | NM_001081090 | Esf1          | - |
| DM126 | Cdkn2a-/-_C57   | LV.SF.LTR | LIVER       | 2 | 142593199 | + | NM_001081133 | Kif16b        | - |
| DM128 | Cdkn2a-/-_C57   | LV.SF.LTR | LIVER       | 2 | 142674050 | + | NM_001081133 | Kif16b        | - |
| DM129 | Cdkn2a-/-_C57   | LV.SF.LTR | LIVER       | 2 | 142680145 | + | NM_001081133 | Kif16b        | - |
| DM30  | Cdkn2a-/-_FVB   | LV.SF.LTR | LIVER       | 2 | 142893433 | + | NM_021335    | Snrpb2        | + |
| DM56  | Cdkn2a-/-_IFNAR | LV.SF.LTR | VER - SPLEE | 2 | 142896624 | - | NM_021335    | Snrpb2        | + |
| DM55  | Cdkn2a-/-_IFNAR | LV.SF.LTR | VER - SPLEE | 2 | 145736542 | - | NM_001141965 | Nat5          | + |
| DM54  | Cdkn2a-/-_IFNAR | LV.SF.LTR | LIVER       | 2 | 146878238 | - | NM_011917    | Xrn2          | + |

|       |                 |           |             |   |           |   |              |         |   |
|-------|-----------------|-----------|-------------|---|-----------|---|--------------|---------|---|
| DM67  | Cdkn2a-/-_C57   | LV.SF.LTR | SPLEEN      | 2 | 148555136 | - | NM_019632    | Napb    | - |
| DM128 | Cdkn2a-/-_C57   | LV.SF.LTR | LIVER       | 2 | 151331532 | + | NM_198326    | Nsf1c   | + |
| DM67  | Cdkn2a-/-_C57   | LV.SF.LTR | SPLEEN      | 2 | 152648176 | + | NM_009743    | Bcl2l1  | - |
| DM65  | Cdkn2a-/-_C57   | LV.SF.LTR | LIVER       | 2 | 153114363 | - | NM_008444    | Kif3b   | + |
| DM128 | Cdkn2a-/-_C57   | LV.SF.LTR | LIVER       | 2 | 154523558 | + | NM_029362    | Chmp4b  | + |
| M207  | Cdkn2a-/-_IFNAR | LV.SF.LTR | LIVER       | 2 | 155491686 | + | NM_019828    | Trpc4ap | - |
| DM38  | Cdkn2a-/-_FVB   | LV.SF.LTR | LIVER       | 2 | 156774317 | - | NM_013865    | Ndr3    | - |
| DM55  | Cdkn2a-/-_IFNAR | LV.SF.LTR | LIVER       | 2 | 160505695 | + | NM_009408    | Top1    | + |
| DM128 | Cdkn2a-/-_C57   | LV.SF.LTR | LIVER       | 2 | 160929461 | - | NM_173368    | Chd6    | - |
| DM66  | Cdkn2a-/-_C57   | LV.SF.LTR | LIVER       | 2 | 173519479 | - | NM_024436    | Rab22a  | + |
| DM131 | Cdkn2a-/-_C57   | LV.SF.LTR | LIVER       | 2 | 174255815 | - | NM_022325    | Ctsz    | - |
| DM40  | Cdkn2a-/-_IFNAR | LV.SF.LTR | LIVER       | 3 | 5560567   | - | NM_008994    | Pxmp3   | - |
| DM67  | Cdkn2a-/-_C57   | LV.SF.LTR | LIVER       | 3 | 5572240   | - | NM_008994    | Pxmp3   | - |
| DM67  | Cdkn2a-/-_C57   | LV.SF.LTR | LIVER       | 3 | 5572861   | - | NM_008994    | Pxmp3   | - |
| M206  | Cdkn2a-/-_IFNAR | LV.SF.LTR | LIVER       | 3 | 8989308   | - | NM_001025263 | Tpd52   | - |
| DM128 | Cdkn2a-/-_C57   | LV.SF.LTR | LIVER       | 3 | 9279044   | - | NM_133218    | Zfp704  | - |
| DM35  | Cdkn2a-/-_FVB   | LV.SF.LTR | LIVER       | 3 | 11492216  | - | NM_001127191 | Snx16   | - |
| DM49  | Cdkn2a-/-_IFNAR | LV.SF.LTR | LIVER       | 3 | 12370114  | + | NM_178631    | Raly1   | + |
| DM67  | Cdkn2a-/-_C57   | LV.SF.LTR | LIVER       | 3 | 13560181  | - | NM_178631    | Raly1   | + |
| DM67  | Cdkn2a-/-_C57   | LV.SF.LTR | VER - SPLEE | 3 | 13568198  | - | NM_178631    | Raly1   | + |
| DM45  | Cdkn2a-/-_IFNAR | LV.SF.LTR | LIVER       | 3 | 14654775  | + | NM_024495    | Car13   | + |
| DM67  | Cdkn2a-/-_C57   | LV.SF.LTR | VER - SPLEE | 3 | 15075777  | - | NM_009801    | Car2    | + |
| DM45  | Cdkn2a-/-_IFNAR | LV.SF.LTR | LIVER       | 3 | 15263225  | - | NM_001076679 | Gm9733  | - |
| DM130 | Cdkn2a-/-_C57   | LV.SF.LTR | LIVER       | 3 | 15890193  | - | NM_001081687 | Gm5150  | - |
| DM67  | Cdkn2a-/-_C57   | LV.SF.LTR | LIVER       | 3 | 18104945  | - | NM_007825    | Cyp7b1  | - |
| DM131 | Cdkn2a-/-_C57   | LV.SF.LTR | LIVER       | 3 | 20007088  | - | NM_144959    | Hltf    | + |
| DM67  | Cdkn2a-/-_C57   | LV.SF.LTR | LIVER       | 3 | 22990087  | - | NR_004439    | Rprl2   | + |
| DM55  | Cdkn2a-/-_IFNAR | LV.SF.LTR | VER - SPLEE | 3 | 27016979  | - | NM_007900    | Ect2    | - |
| DM130 | Cdkn2a-/-_C57   | LV.SF.LTR | LIVER       | 3 | 27026051  | - | NM_007900    | Ect2    | - |
| DM65  | Cdkn2a-/-_C57   | LV.SF.LTR | LIVER       | 3 | 27441574  | + | NM_173182    | Fndc3b  | - |
| DM45  | Cdkn2a-/-_IFNAR | LV.SF.LTR | LIVER       | 3 | 27498454  | + | NM_173182    | Fndc3b  | - |

|       |                |           |                |   |          |   |              |               |   |
|-------|----------------|-----------|----------------|---|----------|---|--------------|---------------|---|
| DM54  | Cdkn2a-/_IFNAR | LV.SF.LTR | LIVER          | 3 | 30511831 | + | NM_030557    | Mynn          | + |
| DM129 | Cdkn2a-/_C57   | LV.SF.LTR | LIVER          | 3 | 30700359 | - | NM_027016    | Sec62         | + |
| DM130 | Cdkn2a-/_C57   | LV.SF.LTR | LIVER          | 3 | 30834857 | + | NM_153421    | Phc3          | - |
| DM128 | Cdkn2a-/_C57   | LV.SF.LTR | LIVER          | 3 | 32458439 | + | NM_024200    | Mfn1          | + |
| DM40  | Cdkn2a-/_IFNAR | LV.SF.LTR | LIVER          | 3 | 36901144 | - | NM_172679    | 4932438A13Rik | + |
| DM129 | Cdkn2a-/_C57   | LV.SF.LTR | LIVER          | 3 | 37379815 | - | NM_021343    | Spata5        | + |
| DM129 | Cdkn2a-/_C57   | LV.SF.LTR | LIVER          | 3 | 38266505 | - | NM_001033198 | Ankrd50       | - |
| DM50  | Cdkn2a-/_IFNAR | LV.SF.LTR | LIVER          | 3 | 41443919 | + | NM_001081411 | Sc11          | - |
| DM65  | Cdkn2a-/_C57   | LV.SF.LTR | LIVER          | 3 | 45089642 | + | NM_001098170 | Pcdh10        | + |
| DM54  | Cdkn2a-/_IFNAR | LV.SF.LTR | LIVER          | 3 | 47887253 | - | NR_003617    | 1700018B24Rik | - |
| DM46  | Cdkn2a-/_IFNAR | LV.SF.LTR | LIVER          | 3 | 47895347 | + | NR_003617    | 1700018B24Rik | - |
| DM67  | Cdkn2a-/_C57   | LV.SF.LTR | SPLEEN         | 3 | 51267072 | + | NM_053089    | Narg1         | + |
| DM119 | Cdkn2a-/_IFNAR | LV.SF.LTR | LIVER          | 3 | 51621987 | + | NM_001004176 | Maml3         | - |
| DM128 | Cdkn2a-/_C57   | LV.SF.LTR | LIVER          | 3 | 53822884 | - | NM_016984    | Trpc4         | + |
| DM130 | Cdkn2a-/_C57   | LV.SF.LTR | LIVER          | 3 | 54475983 | - | NM_019995    | Fam48a        | + |
| DM128 | Cdkn2a-/_C57   | LV.SF.LTR | LIVER          | 3 | 54510091 | + | NM_019995    | Fam48a        | + |
| DM128 | Cdkn2a-/_C57   | LV.SF.LTR | LIVER          | 3 | 54922518 | - | NM_001144987 | Spg20         | + |
| DM67  | Cdkn2a-/_C57   | LV.SF.LTR | LIVER          | 3 | 58187948 | - | NM_001081229 | Tsc22d2       | + |
| DM45  | Cdkn2a-/_IFNAR | LV.SF.LTR | LIVER          | 3 | 58263678 | - | NM_001081229 | Tsc22d2       | + |
| DM131 | Cdkn2a-/_C57   | LV.SF.LTR | LIVER          | 3 | 58926801 | - | NM_001008497 | P2ry14        | - |
| DM31  | Cdkn2a-/_FVB   | LV.SF.LTR | LIVER          | 3 | 63803746 | + | NM_001033300 | Gmps          | + |
| M203  | Cdkn2a-/_IFNAR | LV.SF.LTR | LIVER          | 3 | 65502166 | + | NM_001037923 | Gm6534        | + |
| DM129 | Cdkn2a-/_C57   | LV.SF.LTR | LIVER          | 3 | 75327763 | + | NM_019745    | Pdcd10        | - |
| DM40  | Cdkn2a-/_IFNAR | LV.SF.LTR | LIVER          | 3 | 78114378 | + | NM_001099624 | Rapgef2       | - |
| DM66  | Cdkn2a-/_C57   | LV.SF.LTR | LIVER          | 3 | 79360776 | + | NM_026352    | Ppid          | + |
| DM67  | Cdkn2a-/_C57   | LV.SF.LTR | LIVER - SPLEEN | 3 | 80854358 | + | NM_019971    | Pdgfr         | + |
| DM67  | Cdkn2a-/_C57   | LV.SF.LTR | LIVER          | 3 | 85384422 | - | NM_144896    | Pet112l       | + |
| DM40  | Cdkn2a-/_IFNAR | LV.SF.LTR | LIVER          | 3 | 86414098 | - | NM_001077687 | Lrba          | + |
| M206  | Cdkn2a-/_IFNAR | LV.SF.LTR | LIVER          | 3 | 95372952 | - | NM_026489    | Hormad1       | + |
| DM129 | Cdkn2a-/_C57   | LV.SF.LTR | LIVER          | 3 | 95648611 | + | NM_027541    | Prpf3         | - |
| DM129 | Cdkn2a-/_C57   | LV.SF.LTR | LIVER          | 3 | 96545915 | - | NM_026406    | Rnf115        | + |



|       |                |           |             |   |           |   |              |               |   |
|-------|----------------|-----------|-------------|---|-----------|---|--------------|---------------|---|
| DM55  | Cdkn2a-/_IFNAR | LV.SF.LTR | LIVER       | 3 | 99001199  | + | NM_027462    | Wars2         | + |
| DM129 | Cdkn2a-/_C57   | LV.SF.LTR | LIVER       | 3 | 107110941 | - | NM_146136    | Slc16a4       | + |
| DM67  | Cdkn2a-/_C57   | LV.SF.LTR | LIVER       | 3 | 108709040 | + | NM_025845    | Prpf38b       | - |
| DM65  | Cdkn2a-/_C57   | LV.SF.LTR | LIVER       | 3 | 108989199 | - | NM_172685    | Slc25a24      | + |
| DM128 | Cdkn2a-/_C57   | LV.SF.LTR | LIVER       | 3 | 109156872 | + | NM_020505    | Vav3          | + |
| DM128 | Cdkn2a-/_C57   | LV.SF.LTR | LIVER       | 3 | 115410902 | + | NM_007901    | S1pr1         | - |
| DM65  | Cdkn2a-/_C57   | LV.SF.LTR | LIVER       | 3 | 116006818 | + | NM_001080818 | Cdc14a        | - |
| DM128 | Cdkn2a-/_C57   | LV.SF.LTR | LIVER       | 3 | 117534671 | - | NM_029655    | Snx7          | - |
| DM50  | Cdkn2a-/_IFNAR | LV.SF.LTR | LIVER       | 3 | 119431845 | + | NM_019550    | Ptbp2         | - |
| DM54  | Cdkn2a-/_IFNAR | LV.SF.LTR | LIVER       | 3 | 122653886 | - | NM_133857    | Usp53         | - |
| DM56  | Cdkn2a-/_IFNAR | LV.SF.LTR | VER - SPLEE | 3 | 126342812 | - | NM_001025438 | Camk2d        | + |
| DM65  | Cdkn2a-/_C57   | LV.SF.LTR | LIVER       | 3 | 126384076 | - | NM_001025438 | Camk2d        | + |
| DM45  | Cdkn2a-/_IFNAR | LV.SF.LTR | LIVER       | 3 | 126436206 | + | NM_001025438 | Camk2d        | + |
| M207  | Cdkn2a-/_IFNAR | LV.SF.LTR | LIVER       | 3 | 126522010 | + | NM_001025438 | Camk2d        | + |
| DM126 | Cdkn2a-/_C57   | LV.SF.LTR | LIVER       | 3 | 129202140 | + | NM_130450    | Elov16        | + |
| DM128 | Cdkn2a-/_C57   | LV.SF.LTR | LIVER       | 3 | 131690333 | + | NM_020265    | Dkk2          | + |
| DM65  | Cdkn2a-/_C57   | LV.SF.LTR | LIVER       | 3 | 132362883 | - | NM_173032    | A630047E20Rik | + |
| DM50  | Cdkn2a-/_IFNAR | LV.SF.LTR | LIVER       | 3 | 133017747 | + | NM_146141    | Ppa2          | + |
| DM50  | Cdkn2a-/_IFNAR | LV.SF.LTR | LIVER       | 3 | 133173133 | - | NM_001040400 | Tet2          | - |
| DM51  | Cdkn2a-/_IFNAR | LV.SF.LTR | LIVER       | 3 | 135797948 | - | NM_001033350 | Bank1         | - |
| DM129 | Cdkn2a-/_C57   | LV.SF.LTR | LIVER       | 3 | 135962404 | - | NM_001033350 | Bank1         | - |
| DM43  | Cdkn2a-/_IFNAR | LV.SF.LTR | VER - SPLEE | 3 | 137485195 | - | NM_016750    | H2afz         | + |
| M24   | Cdkn2a-/_IFNAR | LV.SF.LTR | LIVER       | 3 | 137815893 | - | NM_175389    | Rg9mtd2       | + |
| DM130 | Cdkn2a-/_C57   | LV.SF.LTR | LIVER       | 3 | 142524250 | + | NM_178654    | Pkn2          | - |
| DM131 | Cdkn2a-/_C57   | LV.SF.LTR | LIVER       | 3 | 144029102 | + | NM_011828    | Hs2st1        | - |
| DM43  | Cdkn2a-/_IFNAR | LV.SF.LTR | SPLEEN      | 3 | 148454459 | + | NM_001081298 | Lphn2         | - |
| DM52  | Cdkn2a-/_IFNAR | LV.SF.LTR | LIVER       | 3 | 151891861 | + | NM_057172    | Fubp1         | + |
| DM43  | Cdkn2a-/_IFNAR | LV.SF.LTR | LIVER       | 3 | 152087045 | + | NM_198416    | Zzz3          | + |
| DM130 | Cdkn2a-/_C57   | LV.SF.LTR | LIVER       | 3 | 153947691 | + | NM_001081263 | Slc44a5       | + |
| DM54  | Cdkn2a-/_IFNAR | LV.SF.LTR | LIVER       | 3 | 157648833 | - | NM_001013806 | Ankrd13c      | + |
| DM67  | Cdkn2a-/_C57   | LV.SF.LTR | LIVER       | 3 | 157727415 | + | NM_024194    | Lrrc40        | + |

|       |                 |           |             |   |           |   |              |               |   |
|-------|-----------------|-----------|-------------|---|-----------|---|--------------|---------------|---|
| DM131 | Cdkn2a-/-_C57   | LV.SF.LTR | LIVER       | 3 | 159516243 | - | NM_026582    | Gpr177        | + |
| DM40  | Cdkn2a-/-_IFNAR | LV.SF.LTR | LIVER       | 3 | 159587324 | + | NM_026582    | Gpr177        | + |
| DM131 | Cdkn2a-/-_C57   | LV.SF.LTR | LIVER       | 4 | 3488147   | - | NM_028097    | Tmem68        | - |
| DM55  | Cdkn2a-/-_IFNAR | LV.SF.LTR | VER - SPLEE | 4 | 4691010   | - | NM_177730    | Impad1        | - |
| DM40  | Cdkn2a-/-_IFNAR | LV.SF.LTR | LIVER       | 4 | 8490468   | + | NM_021518    | Rab2a         | + |
| DM56  | Cdkn2a-/-_IFNAR | LV.SF.LTR | LIVER       | 4 | 10780383  | + | NM_026005    | 2610301B20Rik | + |
| DM130 | Cdkn2a-/-_C57   | LV.SF.LTR | LIVER       | 4 | 11086295  | + | NM_021897    | Trp53inp1     | + |
| DM40  | Cdkn2a-/-_IFNAR | LV.SF.LTR | LIVER       | 4 | 11472234  | + | NM_001081183 | 1110037F02Rik | + |
| DM65  | Cdkn2a-/-_C57   | LV.SF.LTR | LIVER       | 4 | 12416038  | + | NM_026558    | Fam92a        | - |
| DM131 | Cdkn2a-/-_C57   | LV.SF.LTR | LIVER       | 4 | 15201023  | - | NM_181401    | Tmem64        | + |
| DM128 | Cdkn2a-/-_C57   | LV.SF.LTR | LIVER       | 4 | 16083623  | - | NM_138952    | Ripk2         | - |
| DM43  | Cdkn2a-/-_IFNAR | LV.SF.LTR | VER - SPLEE | 4 | 19559428  | - | NM_177327    | Wwp1          | - |
| DM66  | Cdkn2a-/-_C57   | LV.SF.LTR | LIVER       | 4 | 21754085  | - | NM_152825    | Usp45         | + |
| DM67  | Cdkn2a-/-_C57   | LV.SF.LTR | SPLEEN      | 4 | 21796959  | - | NM_025669    | Sfrs18        | + |
| DM66  | Cdkn2a-/-_C57   | LV.SF.LTR | LIVER       | 4 | 23394510  | - | NM_008899    | Pou3f2        | - |
| DM67  | Cdkn2a-/-_C57   | LV.SF.LTR | VER - SPLEE | 4 | 24449962  | + | NM_199467    | F730047E07Rik | + |
| DM52  | Cdkn2a-/-_IFNAR | LV.SF.LTR | LIVER       | 4 | 24470991  | - | NM_199467    | F730047E07Rik | + |
| DM131 | Cdkn2a-/-_C57   | LV.SF.LTR | LIVER       | 4 | 25194219  | + | NM_026194    | 1810074P20Rik | - |
| M207  | Cdkn2a-/-_IFNAR | LV.SF.LTR | LIVER       | 4 | 30883738  | + | NM_172688    | Map3k7        | + |
| DM35  | Cdkn2a-/-_FVB   | LV.SF.LTR | VER - SPLEE | 4 | 30892121  | + | NM_172688    | Map3k7        | + |
| DM67  | Cdkn2a-/-_C57   | LV.SF.LTR | SPLEEN      | 4 | 32752301  | + | NM_001081392 | Mdn1          | + |
| DM31  | Cdkn2a-/-_FVB   | LV.SF.LTR | LIVER       | 4 | 36646226  | - | NM_175516    | Lingo2        | - |
| DM128 | Cdkn2a-/-_C57   | LV.SF.LTR | LIVER       | 4 | 41377440  | + | NM_024241    | Kif24         | - |
| DM131 | Cdkn2a-/-_C57   | LV.SF.LTR | LIVER       | 4 | 42897534  | - | NM_177785    | BC049635      | - |
| DM40  | Cdkn2a-/-_IFNAR | LV.SF.LTR | LIVER       | 4 | 44798274  | - | NM_138590    | Zcchc7        | + |
| DM119 | Cdkn2a-/-_IFNAR | LV.SF.LTR | LIVER       | 4 | 47339173  | + | NM_009928    | Col15a1       | + |
| DM67  | Cdkn2a-/-_C57   | LV.SF.LTR | SPLEEN      | 4 | 47879916  | - | NM_015743    | Nr4a3         | + |
| DM67  | Cdkn2a-/-_C57   | LV.SF.LTR | SPLEEN      | 4 | 48316656  | + | NM_010569    | Invs          | + |
| DM129 | Cdkn2a-/-_C57   | LV.SF.LTR | LIVER       | 4 | 52485593  | - | NM_008017    | Smc2          | + |
| DM130 | Cdkn2a-/-_C57   | LV.SF.LTR | LIVER       | 4 | 55611721  | + | NM_010637    | Klf4          | - |
| DM37  | Cdkn2a-/-_IFNAR | LV.SF.LTR | LIVER       | 4 | 58892178  | + | NM_172381    | AI314180      | - |

|       |                 |           |             |   |           |   |              |               |   |
|-------|-----------------|-----------|-------------|---|-----------|---|--------------|---------------|---|
| M203  | Cdkn2a-/-_IFNAR | LV.SF.LTR | LIVER       | 4 | 62002986  | + | NM_001045528 | Fkbp15        | - |
| DM54  | Cdkn2a-/-_IFNAR | LV.SF.LTR | LIVER       | 4 | 63254720  | - | NM_144905    | 6330416G13Rik | + |
| DM40  | Cdkn2a-/-_IFNAR | LV.SF.LTR | LIVER       | 4 | 66469002  | - | NM_021297    | Tlr4          | + |
| DM65  | Cdkn2a-/-_C57   | LV.SF.LTR | LIVER       | 4 | 70067577  | + | NM_145990    | Cdk5rap2      | - |
| DM50  | Cdkn2a-/-_IFNAR | LV.SF.LTR | LIVER       | 4 | 70149112  | - | NM_172694    | Megf9         | - |
| DM54  | Cdkn2a-/-_IFNAR | LV.SF.LTR | LIVER       | 4 | 70234106  | + | NM_172694    | Megf9         | - |
| DM45  | Cdkn2a-/-_IFNAR | LV.SF.LTR | LIVER       | 4 | 74014856  | - | NM_144787    | Kdm4c         | + |
| DM131 | Cdkn2a-/-_C57   | LV.SF.LTR | LIVER       | 4 | 79951090  | - | NM_031202    | Tyrp1         | + |
| DM54  | Cdkn2a-/-_IFNAR | LV.SF.LTR | LIVER       | 4 | 79968181  | + | NM_031202    | Tyrp1         | + |
| DM49  | Cdkn2a-/-_IFNAR | LV.SF.LTR | LIVER       | 4 | 84022519  | - | NM_172870    | Bnc2          | - |
| DM46  | Cdkn2a-/-_IFNAR | LV.SF.LTR | LIVER       | 4 | 84751711  | + | NM_175275    | Cntln         | + |
| DM129 | Cdkn2a-/-_C57   | LV.SF.LTR | LIVER       | 4 | 85296053  | - | NM_019535    | Sh3gl2        | + |
| DM129 | Cdkn2a-/-_C57   | LV.SF.LTR | LIVER       | 4 | 86473387  | - | NM_001081014 | Dennd4c       | + |
| DM130 | Cdkn2a-/-_C57   | LV.SF.LTR | LIVER       | 4 | 87544748  | - | NM_027326    | Milt3         | - |
| DM66  | Cdkn2a-/-_C57   | LV.SF.LTR | LIVER       | 4 | 87864006  | + | NM_001081184 | BC057079      | + |
| DM40  | Cdkn2a-/-_IFNAR | LV.SF.LTR | LIVER       | 4 | 93184752  | - | NM_026954    | Tusc1         | - |
| DM54  | Cdkn2a-/-_IFNAR | LV.SF.LTR | LIVER       | 4 | 93213499  | + | NM_026954    | Tusc1         | - |
| DM119 | Cdkn2a-/-_IFNAR | LV.SF.LTR | LIVER       | 4 | 94216925  | + | NM_026368    | 5830433M19Rik | - |
| DM52  | Cdkn2a-/-_IFNAR | LV.SF.LTR | LIVER       | 4 | 94239580  | + | NM_172695    | Plaa          | - |
| DM55  | Cdkn2a-/-_IFNAR | LV.SF.LTR | VER - SPLEE | 4 | 95399957  | - | NM_029347    | Fggy          | + |
| M203  | Cdkn2a-/-_IFNAR | LV.SF.LTR | LIVER       | 4 | 97448732  | + | NM_001122953 | Nfia          | + |
| DM37  | Cdkn2a-/-_IFNAR | LV.SF.LTR | LIVER       | 4 | 98716473  | - | NM_026082    | Dock7         | - |
| DM126 | Cdkn2a-/-_C57   | LV.SF.LTR | LIVER       | 4 | 98802778  | + | NM_026082    | Dock7         | - |
| DM54  | Cdkn2a-/-_IFNAR | LV.SF.LTR | LIVER       | 4 | 101103149 | - | NM_009647    | Ak3l1         | + |
| DM65  | Cdkn2a-/-_C57   | LV.SF.LTR | LIVER       | 4 | 102884194 | + | NM_177732    | Slc35d1       | - |
| DM67  | Cdkn2a-/-_C57   | LV.SF.LTR | LIVER       | 4 | 102993186 | + | NM_025909    | Oma1          | + |
| DM51  | Cdkn2a-/-_IFNAR | LV.SF.LTR | LIVER       | 4 | 102996171 | - | NM_025909    | Oma1          | + |
| DM65  | Cdkn2a-/-_C57   | LV.SF.LTR | LIVER       | 4 | 108278446 | + | NM_011015    | Orc1l         | + |
| DM54  | Cdkn2a-/-_IFNAR | LV.SF.LTR | LIVER       | 4 | 108865145 | - | NM_133885    | Osbp19        | - |
| DM55  | Cdkn2a-/-_IFNAR | LV.SF.LTR | SPLEEN      | 4 | 109556855 | - | NM_007983    | Faf1          | + |
| DM53  | Cdkn2a-/-_IFNAR | LV.SF.LTR | LIVER       | 4 | 109575941 | + | NM_007983    | Faf1          | + |

|       |                 |           |              |   |           |   |              |               |   |
|-------|-----------------|-----------|--------------|---|-----------|---|--------------|---------------|---|
| DM130 | Cdkn2a-/-_C57   | LV.SF.LTR | LIVER        | 4 | 114687251 | + | NM_009185    | Stil          | + |
| DM65  | Cdkn2a-/-_C57   | LV.SF.LTR | LIVER        | 4 | 115442064 | + | NM_172698    | 4732418C07Rik | + |
| DM54  | Cdkn2a-/-_IFNAR | LV.SF.LTR | LIVER        | 4 | 116233821 | + | NM_029868    | Gpbp111       | + |
| DM54  | Cdkn2a-/-_IFNAR | LV.SF.LTR | LIVER        | 4 | 116747248 | - | NM_001111277 | Eif2b3        | + |
| DM130 | Cdkn2a-/-_C57   | LV.SF.LTR | LIVER        | 4 | 125729575 | + | NM_025544    | Mrps15        | + |
| DM126 | Cdkn2a-/-_C57   | LV.SF.LTR | LIVER        | 4 | 148353856 | - | NM_019781    | Pex14         | - |
| DM46  | Cdkn2a-/-_IFNAR | LV.SF.LTR | LIVER        | 4 | 148589277 | - | NM_207682    | Kif1b         | - |
| DM56  | Cdkn2a-/-_IFNAR | LV.SF.LTR | SPLEEN       | 5 | 3210333   | - | NM_009873    | Cdk6          | + |
| DM130 | Cdkn2a-/-_C57   | LV.SF.LTR | LIVER        | 5 | 3512629   | - | NM_009873    | Cdk6          | + |
| DM52  | Cdkn2a-/-_IFNAR | LV.SF.LTR | LIVER        | 5 | 4092378   | - | NM_020010    | Cyp51         | - |
| DM129 | Cdkn2a-/-_C57   | LV.SF.LTR | LIVER        | 5 | 8414674   | + | NM_013726    | Dbf4          | - |
| DM55  | Cdkn2a-/-_IFNAR | LV.SF.LTR | VER - SPLEEN | 5 | 8907056   | - | NM_008830    | Abcb4         | + |
| DM37  | Cdkn2a-/-_IFNAR | LV.SF.LTR | LIVER        | 5 | 8938368   | - | NM_008830    | Abcb4         | + |
| DM131 | Cdkn2a-/-_C57   | LV.SF.LTR | LIVER        | 5 | 9074943   | + | NM_001081029 | 4930420K17Rik | + |
| DM129 | Cdkn2a-/-_C57   | LV.SF.LTR | LIVER        | 5 | 15996532  | - | NM_010427    | Hgf           | + |
| DM67  | Cdkn2a-/-_C57   | LV.SF.LTR | SPLEEN       | 5 | 16926191  | - | NM_027609    | Speer4f       | + |
| M207  | Cdkn2a-/-_IFNAR | LV.SF.LTR | LIVER        | 5 | 17319868  | + | NM_001159555 | Cd36          | - |
| DM67  | Cdkn2a-/-_C57   | LV.SF.LTR | LIVER        | 5 | 17408350  | - | NM_001159558 | Cd36          | - |
| DM131 | Cdkn2a-/-_C57   | LV.SF.LTR | LIVER        | 5 | 21991693  | - | NM_011959    | Orc5l         | - |
| DM67  | Cdkn2a-/-_C57   | LV.SF.LTR | LIVER        | 5 | 22054482  | - | NM_011959    | Orc5l         | - |
| DM54  | Cdkn2a-/-_IFNAR | LV.SF.LTR | LIVER        | 5 | 23497413  | - | NM_053090    | Fam126a       | - |
| DM67  | Cdkn2a-/-_C57   | LV.SF.LTR | VER - SPLEEN | 5 | 24877749  | + | NM_001081383 | Mll3          | - |
| DM68  | Cdkn2a-/-_C57   | LV.SF.LTR | SPLEEN       | 5 | 32160722  | + | NM_144541    | Bre           | + |
| DM55  | Cdkn2a-/-_IFNAR | LV.SF.LTR | VER - SPLEEN | 5 | 38910783  | - | NM_011715    | Wdr1          | - |
| DM129 | Cdkn2a-/-_C57   | LV.SF.LTR | LIVER        | 5 | 43632827  | - | NM_175937    | Cpeb2         | + |
| DM67  | Cdkn2a-/-_C57   | LV.SF.LTR | LIVER        | 5 | 43662361  | - | NM_175937    | Cpeb2         | + |
| DM130 | Cdkn2a-/-_C57   | LV.SF.LTR | LIVER        | 5 | 43793217  | - | NM_001135172 | C1qtnf7       | + |
| DM128 | Cdkn2a-/-_C57   | LV.SF.LTR | LIVER        | 5 | 46085910  | + | NM_019438    | Ncapg         | + |
| DM56  | Cdkn2a-/-_IFNAR | LV.SF.LTR | SPLEEN       | 5 | 46134950  | - | NM_172153    | Lcorl         | - |
| DM131 | Cdkn2a-/-_C57   | LV.SF.LTR | LIVER        | 5 | 46163663  | - | NM_172153    | Lcorl         | - |
| DM50  | Cdkn2a-/-_IFNAR | LV.SF.LTR | LIVER        | 5 | 48344098  | - | NM_178804    | Slit2         | + |

|       |                |           |             |   |           |   |              |          |   |
|-------|----------------|-----------|-------------|---|-----------|---|--------------|----------|---|
| DM56  | Cdkn2a-/_IFNAR | LV.SF.LTR | VER - SPLEE | 5 | 52566622  | - | NM_001042620 | Dhx15    | - |
| DM67  | Cdkn2a-/_C57   | LV.SF.LTR | VER - SPLEE | 5 | 53250584  | + | NM_024213    | Anapc4   | + |
| DM45  | Cdkn2a-/_IFNAR | LV.SF.LTR | LIVER       | 5 | 54227677  | + | NM_144517    | Tbc1d19  | + |
| DM65  | Cdkn2a-/_C57   | LV.SF.LTR | LIVER       | 5 | 54472311  | - | NM_001081103 | Stim2    | + |
| DM129 | Cdkn2a-/_C57   | LV.SF.LTR | LIVER       | 5 | 60230522  | + | NM_001122758 | Pcdh7    | + |
| DM40  | Cdkn2a-/_IFNAR | LV.SF.LTR | LIVER       | 5 | 63039581  | - | NM_178407    | Arap2    | - |
| DM131 | Cdkn2a-/_C57   | LV.SF.LTR | LIVER       | 5 | 63311675  | + | NM_178407    | Arap2    | - |
| DM67  | Cdkn2a-/_C57   | LV.SF.LTR | VER - SPLEE | 5 | 65538423  | + | NM_175174    | Klhl5    | + |
| DM54  | Cdkn2a-/_IFNAR | LV.SF.LTR | LIVER       | 5 | 67670763  | + | NM_028975    | Tmem33   | + |
| DM37  | Cdkn2a-/_IFNAR | LV.SF.LTR | LIVER       | 5 | 73952773  | - | NM_178896    | Dcun1d4  | + |
| DM54  | Cdkn2a-/_IFNAR | LV.SF.LTR | LIVER       | 5 | 76730341  | + | NM_007715    | Clock    | - |
| DM67  | Cdkn2a-/_C57   | LV.SF.LTR | LIVER       | 5 | 81805746  | - | NM_198702    | Lphn3    | + |
| DM126 | Cdkn2a-/_C57   | LV.SF.LTR | LIVER       | 5 | 86464357  | + | NM_007683    | Cenpc1   | - |
| DM65  | Cdkn2a-/_C57   | LV.SF.LTR | LIVER       | 5 | 96571819  | + | NM_178854    | Cnot6l   | - |
| DM129 | Cdkn2a-/_C57   | LV.SF.LTR | LIVER       | 5 | 96585098  | - | NM_178854    | Cnot6l   | - |
| DM129 | Cdkn2a-/_C57   | LV.SF.LTR | LIVER       | 5 | 96604568  | + | NM_144910    | Cnot6l   | - |
| DM56  | Cdkn2a-/_IFNAR | LV.SF.LTR | VER - SPLEE | 5 | 101026135 | - | NM_139198    | Plac8    | - |
| DM29  | Cdkn2a-/_FVB   | LV.SF.LTR | LIVER       | 5 | 102996662 | - | NM_029270    | Arhgap24 | + |
| DM65  | Cdkn2a-/_C57   | LV.SF.LTR | LIVER       | 5 | 104051200 | - | NM_029415    | Slc10a6  | - |
| DM130 | Cdkn2a-/_C57   | LV.SF.LTR | LIVER       | 5 | 104930103 | + | NM_008861    | Pkd2     | + |
| DM66  | Cdkn2a-/_C57   | LV.SF.LTR | LIVER       | 5 | 106310030 | + | NM_018759    | Zfp326   | + |
| DM67  | Cdkn2a-/_C57   | LV.SF.LTR | LIVER       | 5 | 106322265 | - | NM_018759    | Zfp326   | + |
| DM130 | Cdkn2a-/_C57   | LV.SF.LTR | LIVER       | 5 | 107062677 | - | NM_026856    | Zfp644   | - |
| DM45  | Cdkn2a-/_IFNAR | LV.SF.LTR | LIVER       | 5 | 110637434 | - | NM_008146    | Golga3   | + |
| DM126 | Cdkn2a-/_C57   | LV.SF.LTR | LIVER       | 5 | 116322514 | + | NM_007708    | Cit      | + |
| DM66  | Cdkn2a-/_C57   | LV.SF.LTR | LIVER       | 5 | 121607453 | + | NM_001109992 | Ptpn11   | - |
| DM129 | Cdkn2a-/_C57   | LV.SF.LTR | LIVER       | 5 | 123152957 | + | NM_011026    | P2rx4    | + |
| DM40  | Cdkn2a-/_IFNAR | LV.SF.LTR | LIVER       | 5 | 125344718 | - | NM_001081750 | Zfp664   | + |
| DM131 | Cdkn2a-/_C57   | LV.SF.LTR | LIVER       | 5 | 128093151 | + | NM_133895    | Slc15a4  | - |
| DM52  | Cdkn2a-/_IFNAR | LV.SF.LTR | LIVER       | 5 | 134586766 | - | NM_030719    | Gatsl2   | + |
| DM51  | Cdkn2a-/_IFNAR | LV.SF.LTR | LIVER       | 5 | 136479749 | + | NM_023742    | Dtx2     | + |

|       |                 |           |              |   |           |   |              |               |   |
|-------|-----------------|-----------|--------------|---|-----------|---|--------------|---------------|---|
| DM43  | Cdkn2a-/-_IFNAR | LV.SF.LTR | SPLEEN       | 5 | 138318894 | - | NM_001024932 | Pilrb2        | - |
| DM45  | Cdkn2a-/-_IFNAR | LV.SF.LTR | LIVER        | 5 | 144282903 | - | NM_009007    | Rac1          | - |
| DM45  | Cdkn2a-/-_IFNAR | LV.SF.LTR | LIVER        | 5 | 147078943 | - | NM_153599    | Cdk8          | + |
| DM66  | Cdkn2a-/-_C57   | LV.SF.LTR | LIVER        | 5 | 147108192 | - | NM_153599    | Cdk8          | + |
| DM128 | Cdkn2a-/-_C57   | LV.SF.LTR | LIVER        | 5 | 149347675 | - | NM_011908    | Ubl3          | - |
| DM131 | Cdkn2a-/-_C57   | LV.SF.LTR | LIVER        | 5 | 151791149 | + | NM_013823    | Kl            | + |
| M24   | Cdkn2a-/-_IFNAR | LV.SF.LTR | LIVER        | 6 | 4557211   | + | NM_145398    | Casd1         | + |
| DM130 | Cdkn2a-/-_C57   | LV.SF.LTR | LIVER        | 6 | 4941284   | + | NM_181595    | Ppp1r9a       | + |
| DM40  | Cdkn2a-/-_IFNAR | LV.SF.LTR | LIVER        | 6 | 5028719   | + | NM_181595    | Ppp1r9a       | + |
| DM67  | Cdkn2a-/-_C57   | LV.SF.LTR | LIVER        | 6 | 6519396   | - | NM_009169    | Shfm1         | - |
| DM66  | Cdkn2a-/-_C57   | LV.SF.LTR | LIVER        | 6 | 7801299   | - | NM_052993    | C1galt1       | + |
| DM65  | Cdkn2a-/-_C57   | LV.SF.LTR | LIVER        | 6 | 8231953   | + | NM_026632    | Rpa3          | - |
| DM129 | Cdkn2a-/-_C57   | LV.SF.LTR | LIVER        | 6 | 8323027   | - | NM_026632    | Rpa3          | - |
| DM54  | Cdkn2a-/-_IFNAR | LV.SF.LTR | LIVER        | 6 | 11941617  | - | NM_029404    | Phf14         | + |
| DM67  | Cdkn2a-/-_C57   | LV.SF.LTR | LIVER        | 6 | 11987828  | + | NM_029404    | Phf14         | + |
| DM51  | Cdkn2a-/-_IFNAR | LV.SF.LTR | LIVER        | 6 | 13026037  | - | NM_027992    | Tmem106b      | + |
| DM131 | Cdkn2a-/-_C57   | LV.SF.LTR | LIVER        | 6 | 13538175  | - | NM_028990    | Tmem168       | - |
| DM67  | Cdkn2a-/-_C57   | LV.SF.LTR | VER - SPLEEN | 6 | 13560962  | - | NM_028990    | Tmem168       | - |
| DM45  | Cdkn2a-/-_IFNAR | LV.SF.LTR | LIVER        | 6 | 13601815  | + | NM_175312    | B630005N14Rik | - |
| DM129 | Cdkn2a-/-_C57   | LV.SF.LTR | LIVER        | 6 | 15709834  | + | NM_175088    | Mdfic         | + |
| DM66  | Cdkn2a-/-_C57   | LV.SF.LTR | LIVER        | 6 | 15772182  | - | NM_175088    | Mdfic         | + |
| DM131 | Cdkn2a-/-_C57   | LV.SF.LTR | LIVER        | 6 | 16818868  | + | NM_031198    | Tcfec         | - |
| DM67  | Cdkn2a-/-_C57   | LV.SF.LTR | SPLEEN       | 6 | 16885969  | + | NM_031198    | Tcfec         | - |
| DM68  | Cdkn2a-/-_C57   | LV.SF.LTR | SPLEEN       | 6 | 17450342  | - | NM_008591    | Met           | + |
| M206  | Cdkn2a-/-_IFNAR | LV.SF.LTR | LIVER        | 6 | 17609862  | + | NM_007604    | Capza2        | + |
| DM131 | Cdkn2a-/-_C57   | LV.SF.LTR | LIVER        | 6 | 17695790  | - | NM_001083315 | St7           | + |
| DM65  | Cdkn2a-/-_C57   | LV.SF.LTR | LIVER        | 6 | 17705293  | + | NM_001083315 | St7           | + |
| DM131 | Cdkn2a-/-_C57   | LV.SF.LTR | LIVER        | 6 | 22284354  | - | NM_138587    | Fam3c         | - |
| DM54  | Cdkn2a-/-_IFNAR | LV.SF.LTR | LIVER        | 6 | 24468048  | - | NM_026614    | Ndufa5        | - |
| DM66  | Cdkn2a-/-_C57   | LV.SF.LTR | LIVER        | 6 | 24590359  | - | NM_028459    | Wasl          | - |
| DM66  | Cdkn2a-/-_C57   | LV.SF.LTR | LIVER        | 6 | 24925165  | - | NM_177013    | 6332401O19Rik | - |

|       |                |           |             |   |          |   |              |         |   |
|-------|----------------|-----------|-------------|---|----------|---|--------------|---------|---|
| DM40  | Cdkn2a-/_IFNAR | LV.SF.LTR | LIVER       | 6 | 25727693 | + | NM_133931    | Pot1a   | - |
| DM66  | Cdkn2a-/_C57   | LV.SF.LTR | LIVER       | 6 | 25748005 | - | NM_133931    | Pot1a   | - |
| DM128 | Cdkn2a-/_C57   | LV.SF.LTR | LIVER       | 6 | 25755992 | + | NM_133931    | Pot1a   | - |
| M206  | Cdkn2a-/_IFNAR | LV.SF.LTR | LIVER       | 6 | 26355046 | + | NM_133931    | Pot1a   | - |
| DM65  | Cdkn2a-/_C57   | LV.SF.LTR | LIVER       | 6 | 26356891 | + | NM_133931    | Pot1a   | - |
| DM54  | Cdkn2a-/_IFNAR | LV.SF.LTR | LIVER       | 6 | 26379365 | - | NM_133931    | Pot1a   | - |
| M206  | Cdkn2a-/_IFNAR | LV.SF.LTR | LIVER       | 6 | 26815793 | + | NM_008174    | Grm8    | - |
| DM129 | Cdkn2a-/_C57   | LV.SF.LTR | LIVER       | 6 | 28201821 | - | NM_001081678 | Zfp800  | - |
| DM40  | Cdkn2a-/_IFNAR | LV.SF.LTR | LIVER       | 6 | 28526848 | + | NM_019776    | Snd1    | + |
| DM43  | Cdkn2a-/_IFNAR | LV.SF.LTR | VER - SPLEE | 6 | 29549294 | - | NM_177296    | Tnpo3   | - |
| DM55  | Cdkn2a-/_IFNAR | LV.SF.LTR | LIVER       | 6 | 31457232 | + | NM_013791    | Mkln1   | + |
| DM37  | Cdkn2a-/_IFNAR | LV.SF.LTR | LIVER       | 6 | 32427922 | - | NM_175750    | Plxna4  | - |
| DM67  | Cdkn2a-/_C57   | LV.SF.LTR | LIVER       | 6 | 32908225 | + | NM_025336    | Chchd3  | - |
| DM65  | Cdkn2a-/_C57   | LV.SF.LTR | LIVER       | 6 | 33449493 | - | NM_009148    | Exoc4   | + |
| DM51  | Cdkn2a-/_IFNAR | LV.SF.LTR | LIVER       | 6 | 35080424 | - | NM_016877    | Cnot4   | - |
| DM119 | Cdkn2a-/_IFNAR | LV.SF.LTR | LIVER       | 6 | 37109352 | - | NM_001081206 | Dgki    | - |
| DM40  | Cdkn2a-/_IFNAR | LV.SF.LTR | LIVER       | 6 | 37230679 | - | NM_001081206 | Dgki    | - |
| DM46  | Cdkn2a-/_IFNAR | LV.SF.LTR | LIVER       | 6 | 37336475 | - | NM_178661    | Creb3l2 | - |
| DM40  | Cdkn2a-/_IFNAR | LV.SF.LTR | LIVER       | 6 | 39473435 | + | NM_172477    | Dennd2a | - |
| DM65  | Cdkn2a-/_C57   | LV.SF.LTR | LIVER       | 6 | 39594476 | - | NM_139294    | Braf    | - |
| DM131 | Cdkn2a-/_C57   | LV.SF.LTR | LIVER       | 6 | 39594515 | - | NM_139294    | Braf    | - |
| DM33  | Cdkn2a-/_FVB   | LV.SF.LTR | LIVER       | 6 | 39594556 | - | NM_139294    | Braf    | - |
| DM131 | Cdkn2a-/_C57   | LV.SF.LTR | LIVER       | 6 | 39594562 | - | NM_139294    | Braf    | - |
| DM30  | Cdkn2a-/_FVB   | LV.SF.LTR | LIVER       | 6 | 39594622 | - | NM_139294    | Braf    | - |
| DM131 | Cdkn2a-/_C57   | LV.SF.LTR | LIVER       | 6 | 39594636 | - | NM_139294    | Braf    | - |
| DM119 | Cdkn2a-/_IFNAR | LV.SF.LTR | LIVER       | 6 | 39594649 | - | NM_139294    | Braf    | - |
| DM130 | Cdkn2a-/_C57   | LV.SF.LTR | LIVER       | 6 | 39594677 | - | NM_139294    | Braf    | - |
| DM34  | Cdkn2a-/_FVB   | LV.SF.LTR | LIVER       | 6 | 39594806 | - | NM_139294    | Braf    | - |
| DM53  | Cdkn2a-/_IFNAR | LV.SF.LTR | LIVER       | 6 | 39594878 | - | NM_139294    | Braf    | - |
| DM130 | Cdkn2a-/_C57   | LV.SF.LTR | LIVER       | 6 | 39594886 | - | NM_139294    | Braf    | - |
| M24   | Cdkn2a-/_IFNAR | LV.SF.LTR | LIVER       | 6 | 39594915 | - | NM_139294    | Braf    | - |

|       |                |           |             |   |          |   |           |      |   |
|-------|----------------|-----------|-------------|---|----------|---|-----------|------|---|
| DM43  | Cdkn2a-/_IFNAR | LV.SF.LTR | VER - SPLEE | 6 | 39594920 | - | NM_139294 | Braf | - |
| M23   | Cdkn2a-/_IFNAR | LV.SF.LTR | LIVER       | 6 | 39594952 | - | NM_139294 | Braf | - |
| DM38  | Cdkn2a-/_FVB   | LV.SF.LTR | LIVER       | 6 | 39594998 | - | NM_139294 | Braf | - |
| DM68  | Cdkn2a-/_C57   | LV.SF.LTR | SPLEEN      | 6 | 39595042 | - | NM_139294 | Braf | - |
| DM46  | Cdkn2a-/_IFNAR | LV.SF.LTR | LIVER       | 6 | 39595087 | - | NM_139294 | Braf | - |
| DM56  | Cdkn2a-/_IFNAR | LV.SF.LTR | SPLEEN      | 6 | 39595099 | - | NM_139294 | Braf | - |
| M206  | Cdkn2a-/_IFNAR | LV.SF.LTR | LIVER       | 6 | 39595131 | - | NM_139294 | Braf | - |
| DM67  | Cdkn2a-/_C57   | LV.SF.LTR | SPLEEN      | 6 | 39595135 | - | NM_139294 | Braf | - |
| DM131 | Cdkn2a-/_C57   | LV.SF.LTR | LIVER       | 6 | 39595139 | - | NM_139294 | Braf | - |
| DM54  | Cdkn2a-/_IFNAR | LV.SF.LTR | LIVER       | 6 | 39595190 | - | NM_139294 | Braf | - |
| DM43  | Cdkn2a-/_IFNAR | LV.SF.LTR | VER - SPLEE | 6 | 39595247 | + | NM_139294 | Braf | - |
| DM129 | Cdkn2a-/_C57   | LV.SF.LTR | LIVER       | 6 | 39595340 | - | NM_139294 | Braf | - |
| DM65  | Cdkn2a-/_C57   | LV.SF.LTR | LIVER       | 6 | 39595401 | - | NM_139294 | Braf | - |
| DM46  | Cdkn2a-/_IFNAR | LV.SF.LTR | LIVER       | 6 | 39595424 | - | NM_139294 | Braf | - |
| DM129 | Cdkn2a-/_C57   | LV.SF.LTR | LIVER       | 6 | 39595629 | - | NM_139294 | Braf | - |
| DM56  | Cdkn2a-/_IFNAR | LV.SF.LTR | VER - SPLEE | 6 | 39595737 | - | NM_139294 | Braf | - |
| DM49  | Cdkn2a-/_IFNAR | LV.SF.LTR | LIVER       | 6 | 39595846 | - | NM_139294 | Braf | - |
| DM119 | Cdkn2a-/_IFNAR | LV.SF.LTR | LIVER       | 6 | 39595853 | - | NM_139294 | Braf | - |
| DM119 | Cdkn2a-/_IFNAR | LV.SF.LTR | LIVER       | 6 | 39595879 | - | NM_139294 | Braf | - |
| DM50  | Cdkn2a-/_IFNAR | LV.SF.LTR | LIVER       | 6 | 39596041 | - | NM_139294 | Braf | - |
| DM65  | Cdkn2a-/_C57   | LV.SF.LTR | LIVER       | 6 | 39596051 | - | NM_139294 | Braf | - |
| DM130 | Cdkn2a-/_C57   | LV.SF.LTR | LIVER       | 6 | 39596165 | - | NM_139294 | Braf | - |
| DM65  | Cdkn2a-/_C57   | LV.SF.LTR | LIVER       | 6 | 39596191 | - | NM_139294 | Braf | - |
| DM37  | Cdkn2a-/_IFNAR | LV.SF.LTR | LIVER       | 6 | 39596339 | - | NM_139294 | Braf | - |
| DM129 | Cdkn2a-/_C57   | LV.SF.LTR | LIVER       | 6 | 39596452 | - | NM_139294 | Braf | - |
| DM128 | Cdkn2a-/_C57   | LV.SF.LTR | LIVER       | 6 | 39596547 | - | NM_139294 | Braf | - |
| DM45  | Cdkn2a-/_IFNAR | LV.SF.LTR | LIVER       | 6 | 39596611 | - | NM_139294 | Braf | - |
| DM129 | Cdkn2a-/_C57   | LV.SF.LTR | LIVER       | 6 | 39596633 | - | NM_139294 | Braf | - |
| DM126 | Cdkn2a-/_C57   | LV.SF.LTR | LIVER       | 6 | 39596653 | - | NM_139294 | Braf | - |
| DM129 | Cdkn2a-/_C57   | LV.SF.LTR | LIVER       | 6 | 39596657 | - | NM_139294 | Braf | - |
| DM31  | Cdkn2a-/_FVB   | LV.SF.LTR | LIVER       | 6 | 39596671 | - | NM_139294 | Braf | - |



|       |                 |           |             |   |          |   |              |               |   |
|-------|-----------------|-----------|-------------|---|----------|---|--------------|---------------|---|
| DM129 | Cdkn2a-/-_C57   | LV.SF.LTR | LIVER       | 6 | 39596689 | - | NM_139294    | Braf          | - |
| DM31  | Cdkn2a-/-_FVB   | LV.SF.LTR | LIVER       | 6 | 39596724 | - | NM_139294    | Braf          | - |
| DM126 | Cdkn2a-/-_C57   | LV.SF.LTR | LIVER       | 6 | 39596965 | - | NM_139294    | Braf          | - |
| DM130 | Cdkn2a-/-_C57   | LV.SF.LTR | LIVER       | 6 | 39597026 | - | NM_139294    | Braf          | - |
| DM55  | Cdkn2a-/-_IFNAR | LV.SF.LTR | VER - SPLEE | 6 | 39597063 | - | NM_139294    | Braf          | - |
| DM129 | Cdkn2a-/-_C57   | LV.SF.LTR | LIVER       | 6 | 39597079 | - | NM_139294    | Braf          | - |
| M206  | Cdkn2a-/-_IFNAR | LV.SF.LTR | LIVER       | 6 | 39597223 | - | NM_139294    | Braf          | - |
| DM67  | Cdkn2a-/-_C57   | LV.SF.LTR | LIVER       | 6 | 39597265 | - | NM_139294    | Braf          | - |
| DM67  | Cdkn2a-/-_C57   | LV.SF.LTR | LIVER       | 6 | 39597658 | - | NM_139294    | Braf          | - |
| DM66  | Cdkn2a-/-_C57   | LV.SF.LTR | LIVER       | 6 | 39598153 | - | NM_139294    | Braf          | - |
| DM68  | Cdkn2a-/-_C57   | LV.SF.LTR | SPLEEN      | 6 | 39598475 | - | NM_139294    | Braf          | - |
| DM67  | Cdkn2a-/-_C57   | LV.SF.LTR | LIVER       | 6 | 39598493 | - | NM_139294    | Braf          | - |
| DM67  | Cdkn2a-/-_C57   | LV.SF.LTR | LIVER       | 6 | 40315741 | - | NM_023538    | Agk           | + |
| DM54  | Cdkn2a-/-_IFNAR | LV.SF.LTR | LIVER       | 6 | 40538408 | - | NM_001038604 | Clec5a        | - |
| DM37  | Cdkn2a-/-_IFNAR | LV.SF.LTR | LIVER       | 6 | 40560779 | + | NM_001001451 | Tas2r138      | - |
| DM52  | Cdkn2a-/-_IFNAR | LV.SF.LTR | LIVER       | 6 | 40757661 | + | NM_139296    | Moxd2         | - |
| DM67  | Cdkn2a-/-_C57   | LV.SF.LTR | SPLEEN      | 6 | 41692182 | + | NM_146576    | Olf459        | - |
| DM67  | Cdkn2a-/-_C57   | LV.SF.LTR | LIVER       | 6 | 43604070 | - | NM_013861    | Tpk1          | - |
| DM67  | Cdkn2a-/-_C57   | LV.SF.LTR | VER - SPLEE | 6 | 47491153 | - | NM_001146689 | Ezh2          | - |
| DM129 | Cdkn2a-/-_C57   | LV.SF.LTR | LIVER       | 6 | 48923125 | + | NM_001029987 | Doxl2         | + |
| DM37  | Cdkn2a-/-_IFNAR | LV.SF.LTR | LIVER       | 6 | 51882025 | + | NM_018773    | Skap2         | - |
| DM40  | Cdkn2a-/-_IFNAR | LV.SF.LTR | LIVER       | 6 | 52502806 | + | NM_145567    | Hibadh        | - |
| DM66  | Cdkn2a-/-_C57   | LV.SF.LTR | LIVER       | 6 | 52700754 | + | NM_025816    | Tax1bp1       | + |
| DM67  | Cdkn2a-/-_C57   | LV.SF.LTR | SPLEEN      | 6 | 58621406 | - | NM_011920    | Abcg2         | + |
| DM55  | Cdkn2a-/-_IFNAR | LV.SF.LTR | VER - SPLEE | 6 | 58852898 | + | NM_028705    | Herc3         | + |
| DM31  | Cdkn2a-/-_FVB   | LV.SF.LTR | LIVER       | 6 | 61018428 | - | NM_009221    | Snca          | - |
| DM40  | Cdkn2a-/-_IFNAR | LV.SF.LTR | LIVER       | 6 | 65023539 | - | NM_007958    | Smarcad1      | + |
| DM130 | Cdkn2a-/-_C57   | LV.SF.LTR | LIVER       | 6 | 65057137 | - | NM_007958    | Smarcad1      | + |
| DM55  | Cdkn2a-/-_IFNAR | LV.SF.LTR | LIVER       | 6 | 66495654 | + | NM_019499    | Mad2l1        | + |
| DM67  | Cdkn2a-/-_C57   | LV.SF.LTR | LIVER       | 6 | 66497191 | - | NM_134170    | V1rc15        | - |
| DM46  | Cdkn2a-/-_IFNAR | LV.SF.LTR | LIVER       | 6 | 73648598 | - | NM_025737    | 4931417E11Rik | - |

|       |                 |           |        |   |           |   |              |               |   |
|-------|-----------------|-----------|--------|---|-----------|---|--------------|---------------|---|
| DM130 | Cdkn2a-/-_C57   | LV.SF.LTR | LIVER  | 6 | 81422241  | + | NM_177884    | AW146020      | + |
| DM66  | Cdkn2a-/-_C57   | LV.SF.LTR | LIVER  | 6 | 89212784  | - | NM_201356    | Gm839         | - |
| DM131 | Cdkn2a-/-_C57   | LV.SF.LTR | LIVER  | 6 | 93724870  | + | NM_001083321 | Magi1         | - |
| DM53  | Cdkn2a-/-_IFNAR | LV.SF.LTR | LIVER  | 6 | 93735355  | - | NM_001083321 | Magi1         | - |
| DM56  | Cdkn2a-/-_IFNAR | LV.SF.LTR | LIVER  | 6 | 94496913  | - | NM_026255    | Slc25a26      | + |
| DM40  | Cdkn2a-/-_IFNAR | LV.SF.LTR | LIVER  | 6 | 95472753  | - | NM_011507    | Sucg2         | - |
| DM67  | Cdkn2a-/-_C57   | LV.SF.LTR | LIVER  | 6 | 95514687  | - | NM_011507    | Sucg2         | - |
| DM56  | Cdkn2a-/-_IFNAR | LV.SF.LTR | SPLEEN | 6 | 96020061  | - | NM_182808    | Fam19a1       | + |
| DM65  | Cdkn2a-/-_C57   | LV.SF.LTR | LIVER  | 6 | 97314218  | + | NM_145148    | Frmd4b        | - |
| DM128 | Cdkn2a-/-_C57   | LV.SF.LTR | LIVER  | 6 | 103476207 | + | NM_007697    | Ch11          | + |
| DM126 | Cdkn2a-/-_C57   | LV.SF.LTR | LIVER  | 6 | 106022037 | - | NM_001109749 | Cntn4         | + |
| DM119 | Cdkn2a-/-_IFNAR | LV.SF.LTR | LIVER  | 6 | 106731763 | - | NM_027296    | Trnt1         | + |
| DM54  | Cdkn2a-/-_IFNAR | LV.SF.LTR | LIVER  | 6 | 113054661 | - | NM_028385    | Setd5         | + |
| DM40  | Cdkn2a-/-_IFNAR | LV.SF.LTR | LIVER  | 6 | 115318545 | + | NM_001127330 | Pparg         | + |
| DM66  | Cdkn2a-/-_C57   | LV.SF.LTR | LIVER  | 6 | 119134680 | + | NM_001033379 | Dcp1b         | + |
| DM67  | Cdkn2a-/-_C57   | LV.SF.LTR | SPLEEN | 6 | 119921185 | - | NM_198703    | Wnk1          | - |
| DM51  | Cdkn2a-/-_IFNAR | LV.SF.LTR | LIVER  | 6 | 120911184 | + | NM_007544    | Bid           | - |
| DM67  | Cdkn2a-/-_C57   | LV.SF.LTR | SPLEEN | 6 | 124294932 | - | NM_053094    | Cd163         | + |
| DM65  | Cdkn2a-/-_C57   | LV.SF.LTR | LIVER  | 6 | 124644841 | - | NM_145130    | Lpcat3        | + |
| DM46  | Cdkn2a-/-_IFNAR | LV.SF.LTR | LIVER  | 6 | 128380592 | - | NM_010219    | Fkbp4         | - |
| DM56  | Cdkn2a-/-_IFNAR | LV.SF.LTR | SPLEEN | 6 | 128920742 | - | NM_027562    | Clec2g        | + |
| DM128 | Cdkn2a-/-_C57   | LV.SF.LTR | LIVER  | 6 | 129221681 | - | NM_001033122 | Cd69          | - |
| DM67  | Cdkn2a-/-_C57   | LV.SF.LTR | LIVER  | 6 | 131334216 | - | NM_011733    | Csda          | - |
| DM33  | Cdkn2a-/-_FVB   | LV.SF.LTR | LIVER  | 6 | 131478742 | - | NM_199156    | Tas2r130      | - |
| DM131 | Cdkn2a-/-_C57   | LV.SF.LTR | LIVER  | 6 | 134453111 | - | NM_008514    | Lrp6          | - |
| DM129 | Cdkn2a-/-_C57   | LV.SF.LTR | LIVER  | 6 | 134686686 | + | NM_001048054 | Dusp16        | - |
| DM131 | Cdkn2a-/-_C57   | LV.SF.LTR | LIVER  | 6 | 136482282 | + | NM_019426    | Atf7ip        | + |
| DM130 | Cdkn2a-/-_C57   | LV.SF.LTR | LIVER  | 6 | 137754598 | - | NM_172733    | Dera          | + |
| DM131 | Cdkn2a-/-_C57   | LV.SF.LTR | LIVER  | 6 | 139809328 | + | NM_011084    | Pik3c2g       | + |
| DM51  | Cdkn2a-/-_IFNAR | LV.SF.LTR | LIVER  | 6 | 142944558 | + | NM_001109688 | 5730419I09Rik | - |
| DM126 | Cdkn2a-/-_C57   | LV.SF.LTR | LIVER  | 6 | 143011662 | + | NM_001109688 | 5730419I09Rik | - |

|       |                 |           |             |   |           |   |              |               |   |
|-------|-----------------|-----------|-------------|---|-----------|---|--------------|---------------|---|
| DM55  | Cdkn2a-/-_IFNAR | LV.SF.LTR | VER - SPLEE | 6 | 148144695 | + | NM_026355    | Ergic2        | - |
| DM65  | Cdkn2a-/-_C57   | LV.SF.LTR | LIVER       | 6 | 148794148 | - | NM_181541    | Caprin2       | - |
| DM66  | Cdkn2a-/-_C57   | LV.SF.LTR | LIVER       | 6 | 149212185 | - | NM_026054    | 2810474O19Rik | + |
| DM67  | Cdkn2a-/-_C57   | LV.SF.LTR | SPLEEN      | 7 | 3480594   | + | NM_177363    | Gm9904        | - |
| DM54  | Cdkn2a-/-_IFNAR | LV.SF.LTR | LIVER       | 7 | 4632621   | + | NM_024172    | Hspb1         | - |
| DM33  | Cdkn2a-/-_FVB   | LV.SF.LTR | LIVER       | 7 | 6340462   | + | NM_175247    | Zfp28         | + |
| DM131 | Cdkn2a-/-_C57   | LV.SF.LTR | LIVER       | 7 | 13422464  | + | NM_022981    | Zfp110        | + |
| DM131 | Cdkn2a-/-_C57   | LV.SF.LTR | LIVER       | 7 | 13912343  | - | NM_001004762 | Pla2g4c       | + |
| DM67  | Cdkn2a-/-_C57   | LV.SF.LTR | LIVER       | 7 | 28601931  | - | NM_011762    | Zfp59         | + |
| DM46  | Cdkn2a-/-_IFNAR | LV.SF.LTR | LIVER       | 7 | 28972913  | + | NM_001037957 | Dyrk1b        | + |
| DM67  | Cdkn2a-/-_C57   | LV.SF.LTR | LIVER       | 7 | 29705672  | + | NM_021895    | Actn4         | - |
| DM128 | Cdkn2a-/-_C57   | LV.SF.LTR | LIVER       | 7 | 30130799  | + | NM_001081028 | Sipa1l3       | - |
| DM128 | Cdkn2a-/-_C57   | LV.SF.LTR | LIVER       | 7 | 38756078  | + | NM_011274    | C80913        | - |
| DM129 | Cdkn2a-/-_C57   | LV.SF.LTR | LIVER       | 7 | 39010690  | + | NM_024413    | Plekhf1       | - |
| DM67  | Cdkn2a-/-_C57   | LV.SF.LTR | LIVER       | 7 | 48640545  | - | NM_183167    | AI987944      | - |
| DM65  | Cdkn2a-/-_C57   | LV.SF.LTR | LIVER       | 7 | 48642602  | - | NM_183167    | AI987944      | - |
| DM67  | Cdkn2a-/-_C57   | LV.SF.LTR | LIVER       | 7 | 50515884  | + | NM_027264    | Zfp715        | - |
| DM40  | Cdkn2a-/-_IFNAR | LV.SF.LTR | LIVER       | 7 | 54188169  | + | NM_001040695 | Uevld         | - |
| DM129 | Cdkn2a-/-_C57   | LV.SF.LTR | LIVER       | 7 | 56446253  | + | NM_001111016 | Nav2          | + |
| DM119 | Cdkn2a-/-_IFNAR | LV.SF.LTR | LIVER       | 7 | 57088609  | - | NM_133740    | Prmt3         | + |
| DM55  | Cdkn2a-/-_IFNAR | LV.SF.LTR | LIVER       | 7 | 63184530  | - | NM_011370    | Cyfip1        | + |
| DM67  | Cdkn2a-/-_C57   | LV.SF.LTR | SPLEEN      | 7 | 66496927  | + | NM_001033962 | Ube3a         | + |
| DM53  | Cdkn2a-/-_IFNAR | LV.SF.LTR | LIVER       | 7 | 66544030  | + | NM_173010    | Ube3a         | + |
| DM51  | Cdkn2a-/-_IFNAR | LV.SF.LTR | LIVER       | 7 | 66571244  | - | NM_001033962 | Ube3a         | + |
| DM46  | Cdkn2a-/-_IFNAR | LV.SF.LTR | LIVER       | 7 | 67123825  | - | NM_001082961 | Snrpn         | - |
| DM130 | Cdkn2a-/-_C57   | LV.SF.LTR | LIVER       | 7 | 71072092  | - | NM_021366    | Klf13         | - |
| DM45  | Cdkn2a-/-_IFNAR | LV.SF.LTR | LIVER       | 7 | 72815130  | - | NM_172310    | Tarsl2        | + |
| DM65  | Cdkn2a-/-_C57   | LV.SF.LTR | LIVER       | 7 | 72843724  | + | NM_026795    | Tm2d3         | + |
| DM56  | Cdkn2a-/-_IFNAR | LV.SF.LTR | VER - SPLEE | 7 | 74495125  | - | NM_001033713 | Mef2a         | - |
| DM40  | Cdkn2a-/-_IFNAR | LV.SF.LTR | LIVER       | 7 | 82818399  | - | NM_029332    | Akap13        | + |
| DM129 | Cdkn2a-/-_C57   | LV.SF.LTR | LIVER       | 7 | 86506936  | - | NM_018811    | Abhd2         | + |

|       |                 |           |             |   |           |   |              |               |   |
|-------|-----------------|-----------|-------------|---|-----------|---|--------------|---------------|---|
| DM128 | Cdkn2a-/-_C57   | LV.SF.LTR | LIVER       | 7 | 88969511  | - | NM_146193    | Btbd1         | - |
| DM40  | Cdkn2a-/-_IFNAR | LV.SF.LTR | LIVER       | 7 | 90206800  | - | NM_175366    | Mex3b         | + |
| DM40  | Cdkn2a-/-_IFNAR | LV.SF.LTR | LIVER       | 7 | 90265133  | + | NM_175366    | Mex3b         | + |
| DM130 | Cdkn2a-/-_C57   | LV.SF.LTR | LIVER       | 7 | 91799925  | + | NM_022985    | Zfand6        | - |
| DM55  | Cdkn2a-/-_IFNAR | LV.SF.LTR | VER - SPLEE | 7 | 95263821  | - | NM_001081414 | Grm5          | + |
| DM131 | Cdkn2a-/-_C57   | LV.SF.LTR | LIVER       | 7 | 96463079  | + | NM_028343    | Tmem135       | - |
| DM67  | Cdkn2a-/-_C57   | LV.SF.LTR | LIVER       | 7 | 98810675  | + | NM_011807    | Dlg2          | + |
| DM51  | Cdkn2a-/-_IFNAR | LV.SF.LTR | LIVER       | 7 | 98833832  | - | NM_011807    | Dlg2          | + |
| DM129 | Cdkn2a-/-_C57   | LV.SF.LTR | LIVER       | 7 | 98939492  | - | NM_011807    | Dlg2          | + |
| DM67  | Cdkn2a-/-_C57   | LV.SF.LTR | VER - SPLEE | 7 | 99800757  | - | NM_029078    | Pcf11         | - |
| DM65  | Cdkn2a-/-_C57   | LV.SF.LTR | LIVER       | 7 | 99805626  | - | NM_029078    | Pcf11         | - |
| DM129 | Cdkn2a-/-_C57   | LV.SF.LTR | LIVER       | 7 | 99809546  | + | NM_029078    | Pcf11         | - |
| M23   | Cdkn2a-/-_IFNAR | LV.SF.LTR | LIVER       | 7 | 99815758  | + | NM_029078    | Pcf11         | - |
| DM128 | Cdkn2a-/-_C57   | LV.SF.LTR | LIVER       | 7 | 103614631 | + | NM_011858    | Odz4          | + |
| DM40  | Cdkn2a-/-_IFNAR | LV.SF.LTR | LIVER       | 7 | 104233738 | - | NM_010248    | Gab2          | + |
| DM54  | Cdkn2a-/-_IFNAR | LV.SF.LTR | LIVER       | 7 | 104535418 | + | NM_199035    | Alg8          | + |
| DM65  | Cdkn2a-/-_C57   | LV.SF.LTR | LIVER       | 7 | 106671716 | - | NM_177231    | Arrb1         | + |
| DM54  | Cdkn2a-/-_IFNAR | LV.SF.LTR | LIVER       | 7 | 109598362 | - | NM_009103    | Rrm1          | + |
| DM67  | Cdkn2a-/-_C57   | LV.SF.LTR | SPLEEN      | 7 | 111512521 | + | NM_175648    | A530023O14Rik | - |
| DM129 | Cdkn2a-/-_C57   | LV.SF.LTR | LIVER       | 7 | 117080707 | + | NM_021494    | Dennd5a       | - |
| DM43  | Cdkn2a-/-_IFNAR | LV.SF.LTR | VER - SPLEE | 7 | 117620145 | + | NM_009627    | Adm           | + |
| DM129 | Cdkn2a-/-_C57   | LV.SF.LTR | LIVER       | 7 | 117684703 | + | NM_009627    | Adm           | + |
| DM37  | Cdkn2a-/-_IFNAR | LV.SF.LTR | LIVER       | 7 | 118241973 | - | NM_001040131 | Eif4g2        | - |
| DM130 | Cdkn2a-/-_C57   | LV.SF.LTR | LIVER       | 7 | 119249976 | - | NM_133758    | Usp47         | + |
| DM130 | Cdkn2a-/-_C57   | LV.SF.LTR | LIVER       | 7 | 120487765 | + | NM_133700    | Btbd10        | - |
| DM67  | Cdkn2a-/-_C57   | LV.SF.LTR | VER - SPLEE | 7 | 121330171 | - | NM_033370    | Copb1         | - |
| DM67  | Cdkn2a-/-_C57   | LV.SF.LTR | VER - SPLEE | 7 | 127009728 | + | NM_173408    | Dcun1d3       | - |
| DM54  | Cdkn2a-/-_IFNAR | LV.SF.LTR | LIVER       | 7 | 127869864 | + | NM_177697    | Vwa3a         | + |
| DM129 | Cdkn2a-/-_C57   | LV.SF.LTR | LIVER       | 7 | 128593435 | + | NM_001081327 | Hs3st2        | + |
| DM43  | Cdkn2a-/-_IFNAR | LV.SF.LTR | VER - SPLEE | 7 | 130534826 | - | NM_025304    | Lcmt1         | + |
| DM54  | Cdkn2a-/-_IFNAR | LV.SF.LTR | LIVER       | 7 | 132576601 | + | NM_029842    | Jmjd5         | + |

|       |                |           |                |   |           |   |              |               |   |
|-------|----------------|-----------|----------------|---|-----------|---|--------------|---------------|---|
| DM37  | Cdkn2a-/_IFNAR | LV.SF.LTR | LIVER          | 7 | 134703278 | - | NM_026888    | Phkg2         | + |
| DM56  | Cdkn2a-/_IFNAR | LV.SF.LTR | LIVER - SPLEEN | 7 | 138482638 | - | NM_183272    | 1700063I17Rik | + |
| DM56  | Cdkn2a-/_IFNAR | LV.SF.LTR | LIVER - SPLEEN | 7 | 138573047 | - | NM_025826    | Acadsb        | + |
| DM130 | Cdkn2a-/_C57   | LV.SF.LTR | LIVER          | 7 | 146070197 | - | NM_026391    | Ppp2r2d       | + |
| DM67  | Cdkn2a-/_C57   | LV.SF.LTR | SPLEEN         | 7 | 146087216 | + | NM_009760    | Bnip3         | - |
| DM131 | Cdkn2a-/_C57   | LV.SF.LTR | LIVER          | 7 | 146715924 | - | NM_001127363 | Inpp5a        | + |
| DM40  | Cdkn2a-/_IFNAR | LV.SF.LTR | LIVER          | 7 | 150209444 | + | NM_001128080 | Tspan32       | + |
| M206  | Cdkn2a-/_IFNAR | LV.SF.LTR | LIVER          | 7 | 151672461 | + | NM_001033319 | Ppfia1        | - |
| M207  | Cdkn2a-/_IFNAR | LV.SF.LTR | LIVER          | 8 | 4741758   | + | NM_011369    | Shcbp1        | - |
| DM130 | Cdkn2a-/_C57   | LV.SF.LTR | LIVER          | 8 | 6137650   | + | NM_011388    | Slc10a2       | - |
| DM128 | Cdkn2a-/_C57   | LV.SF.LTR | LIVER          | 8 | 7999962   | + | NM_010111    | Efnb2         | - |
| DM128 | Cdkn2a-/_C57   | LV.SF.LTR | LIVER          | 8 | 24020786  | + | NM_001081149 | Myst3         | + |
| DM67  | Cdkn2a-/_C57   | LV.SF.LTR | SPLEEN         | 8 | 24063431  | + | NM_001081149 | Myst3         | + |
| DM130 | Cdkn2a-/_C57   | LV.SF.LTR | LIVER          | 8 | 33422970  | - | NM_178591    | Nrg1          | - |
| DM67  | Cdkn2a-/_C57   | LV.SF.LTR | SPLEEN         | 8 | 33993325  | + | NM_001122822 | Wrn           | - |
| DM119 | Cdkn2a-/_IFNAR | LV.SF.LTR | LIVER          | 8 | 35197921  | - | NM_026609    | Leprotl1      | - |
| DM131 | Cdkn2a-/_C57   | LV.SF.LTR | LIVER          | 8 | 35964683  | - | NM_175091    | Tnks          | - |
| DM130 | Cdkn2a-/_C57   | LV.SF.LTR | LIVER          | 8 | 36588774  | + | NM_026067    | Eri1          | - |
| DM129 | Cdkn2a-/_C57   | LV.SF.LTR | LIVER          | 8 | 36598467  | + | NM_026067    | Eri1          | - |
| DM131 | Cdkn2a-/_C57   | LV.SF.LTR | LIVER          | 8 | 37744314  | + | NM_015802    | Dlc1          | - |
| DM65  | Cdkn2a-/_C57   | LV.SF.LTR | LIVER          | 8 | 37922317  | - | NM_178735    | A730069N07Rik | - |
| DM67  | Cdkn2a-/_C57   | LV.SF.LTR | LIVER          | 8 | 37927874  | - | NM_178735    | A730069N07Rik | - |
| DM131 | Cdkn2a-/_C57   | LV.SF.LTR | LIVER          | 8 | 40141781  | - | NM_030254    | Tusc3         | + |
| DM67  | Cdkn2a-/_C57   | LV.SF.LTR | LIVER          | 8 | 40712900  | + | NM_001113326 | Msr1          | - |
| M23   | Cdkn2a-/_IFNAR | LV.SF.LTR | LIVER          | 8 | 40746635  | - | NM_001113326 | Msr1          | - |
| DM34  | Cdkn2a-/_FVB   | LV.SF.LTR | LIVER          | 8 | 41590176  | - | NM_011135    | Cnot7         | - |
| DM67  | Cdkn2a-/_C57   | LV.SF.LTR | SPLEEN         | 8 | 42346522  | - | NM_023662    | Pcm1          | + |
| DM40  | Cdkn2a-/_IFNAR | LV.SF.LTR | LIVER          | 8 | 42371768  | + | NM_023662    | Pcm1          | + |
| DM131 | Cdkn2a-/_C57   | LV.SF.LTR | LIVER          | 8 | 43337700  | + | NM_153096    | Zfp353        | - |
| DM54  | Cdkn2a-/_IFNAR | LV.SF.LTR | LIVER          | 8 | 47273201  | + | NM_025747    | 4933411K20Rik | + |
| DM52  | Cdkn2a-/_IFNAR | LV.SF.LTR | LIVER          | 8 | 49204339  | + | NM_001161515 | Dctd          | + |

|       |                 |           |              |   |           |   |              |               |   |
|-------|-----------------|-----------|--------------|---|-----------|---|--------------|---------------|---|
| DM66  | Cdkn2a-/-_C57   | LV.SF.LTR | LIVER        | 8 | 54526664  | - | NM_001005847 | Aga           | + |
| DM126 | Cdkn2a-/-_C57   | LV.SF.LTR | LIVER        | 8 | 54533552  | + | NM_001005847 | Aga           | + |
| DM53  | Cdkn2a-/-_IFNAR | LV.SF.LTR | LIVER        | 8 | 58591847  | + | NM_080438    | Gla3          | + |
| DM52  | Cdkn2a-/-_IFNAR | LV.SF.LTR | LIVER        | 8 | 58797434  | + | NM_008278    | Hpgd          | + |
| DM131 | Cdkn2a-/-_C57   | LV.SF.LTR | LIVER        | 8 | 59067745  | - | NM_015791    | Fbxo8         | + |
| DM126 | Cdkn2a-/-_C57   | LV.SF.LTR | LIVER        | 8 | 59995613  | + | NM_008252    | Hmgb2         | + |
| DM40  | Cdkn2a-/-_IFNAR | LV.SF.LTR | LIVER        | 8 | 63492817  | + | NM_175089    | Nek1          | + |
| DM130 | Cdkn2a-/-_C57   | LV.SF.LTR | LIVER        | 8 | 63525288  | + | NM_175089    | Nek1          | + |
| DM126 | Cdkn2a-/-_C57   | LV.SF.LTR | LIVER        | 8 | 63550208  | - | NM_175089    | Nek1          | + |
| DM130 | Cdkn2a-/-_C57   | LV.SF.LTR | LIVER        | 8 | 64041475  | + | NM_001081390 | Palld         | - |
| DM67  | Cdkn2a-/-_C57   | LV.SF.LTR | SPLEEN       | 8 | 68935501  | + | NM_175188    | 1-Mar         | + |
| DM65  | Cdkn2a-/-_C57   | LV.SF.LTR | LIVER        | 8 | 69400951  | - | NM_010934    | Npy1r         | + |
| DM54  | Cdkn2a-/-_IFNAR | LV.SF.LTR | LIVER        | 8 | 70295916  | + | NM_027626    | Psd3          | - |
| DM119 | Cdkn2a-/-_IFNAR | LV.SF.LTR | LIVER        | 8 | 72716086  | - | NM_001007570 | Slc25a42      | - |
| DM40  | Cdkn2a-/-_IFNAR | LV.SF.LTR | LIVER        | 8 | 77689844  | - | NM_008566    | Mcm5          | + |
| DM67  | Cdkn2a-/-_C57   | LV.SF.LTR | LIVER        | 8 | 81877755  | - | NM_008539    | Smad1         | - |
| DM51  | Cdkn2a-/-_IFNAR | LV.SF.LTR | LIVER        | 8 | 84917104  | + | NM_008357    | Il15          | - |
| DM67  | Cdkn2a-/-_C57   | LV.SF.LTR | LIVER        | 8 | 93992116  | + | NM_011936    | Fto           | + |
| DM130 | Cdkn2a-/-_C57   | LV.SF.LTR | LIVER        | 8 | 95406309  | + | NM_173014    | Lpcat2        | + |
| DM51  | Cdkn2a-/-_IFNAR | LV.SF.LTR | LIVER        | 8 | 96546509  | + | NM_026623    | Nudt21        | - |
| DM129 | Cdkn2a-/-_C57   | LV.SF.LTR | LIVER        | 8 | 96969974  | - | NM_022331    | Herpud1       | + |
| DM67  | Cdkn2a-/-_C57   | LV.SF.LTR | SPLEEN       | 8 | 110920563 | + | NM_007496    | Zfhx3         | + |
| DM40  | Cdkn2a-/-_IFNAR | LV.SF.LTR | LIVER        | 8 | 117841356 | - | NM_019573    | Wwox          | + |
| DM65  | Cdkn2a-/-_C57   | LV.SF.LTR | LIVER        | 8 | 126780126 | - | NM_139272    | Galnt2        | + |
| DM51  | Cdkn2a-/-_IFNAR | LV.SF.LTR | LIVER        | 8 | 127251115 | + | NM_026855    | Arv1          | + |
| DM130 | Cdkn2a-/-_C57   | LV.SF.LTR | LIVER        | 9 | 4308528   | - | NM_026276    | Aasdhppt      | - |
| DM65  | Cdkn2a-/-_C57   | LV.SF.LTR | LIVER        | 9 | 5592413   | - | NM_009808    | Casp12        | + |
| DM129 | Cdkn2a-/-_C57   | LV.SF.LTR | LIVER        | 9 | 7275085   | + | NM_008607    | Mmp13         | + |
| DM128 | Cdkn2a-/-_C57   | LV.SF.LTR | LIVER        | 9 | 7757283   | - | NM_133739    | Tmem123       | + |
| DM43  | Cdkn2a-/-_IFNAR | LV.SF.LTR | VER - SPLEEN | 9 | 9235489   | - | NM_027823    | 9030420J04Rik | - |
| DM54  | Cdkn2a-/-_IFNAR | LV.SF.LTR | LIVER        | 9 | 9656098   | + | NM_001033359 | Cntn5         | - |

|       |                |           |             |   |          |   |              |               |   |
|-------|----------------|-----------|-------------|---|----------|---|--------------|---------------|---|
| DM54  | Cdkn2a-/_IFNAR | LV.SF.LTR | LIVER       | 9 | 13555737 | + | NM_023858    | Mtmr2         | + |
| DM67  | Cdkn2a-/_C57   | LV.SF.LTR | LIVER       | 9 | 20249058 | + | NM_011753    | Zfp26         | - |
| DM128 | Cdkn2a-/_C57   | LV.SF.LTR | LIVER       | 9 | 24285797 | - | NM_172920    | Dpy19l1       | - |
| DM37  | Cdkn2a-/_IFNAR | LV.SF.LTR | LIVER       | 9 | 25088070 | - | NM_009859    | 7-Sep         | + |
| DM65  | Cdkn2a-/_C57   | LV.SF.LTR | LIVER       | 9 | 26805676 | + | NM_025862    | Acad8         | - |
| DM128 | Cdkn2a-/_C57   | LV.SF.LTR | LIVER       | 9 | 26822213 | - | NM_178027    | Vps26b        | - |
| DM130 | Cdkn2a-/_C57   | LV.SF.LTR | LIVER       | 9 | 31935675 | + | NM_177379    | Grit          | + |
| DM31  | Cdkn2a-/_FVB   | LV.SF.LTR | LIVER       | 9 | 34121588 | - | NM_026324    | Kirrel3       | + |
| DM51  | Cdkn2a-/_IFNAR | LV.SF.LTR | LIVER       | 9 | 35113051 | - | NM_028040    | Rpsud4        | + |
| DM65  | Cdkn2a-/_C57   | LV.SF.LTR | LIVER       | 9 | 35373534 | + | NM_023292    | Pus3          | + |
| DM67  | Cdkn2a-/_C57   | LV.SF.LTR | SPLEEN      | 9 | 48869848 | - | NM_012039    | Zw10          | + |
| DM128 | Cdkn2a-/_C57   | LV.SF.LTR | LIVER       | 9 | 51965422 | + | NM_001104616 | Rdx           | + |
| M206  | Cdkn2a-/_IFNAR | LV.SF.LTR | LIVER       | 9 | 54312676 | - | NM_172771    | Dmxl2         | - |
| DM131 | Cdkn2a-/_C57   | LV.SF.LTR | LIVER       | 9 | 59616786 | - | NM_027838    | Senp8         | - |
| DM129 | Cdkn2a-/_C57   | LV.SF.LTR | LIVER       | 9 | 59622806 | - | NM_027838    | Senp8         | - |
| DM129 | Cdkn2a-/_C57   | LV.SF.LTR | LIVER       | 9 | 63240405 | - | NM_027090    | 2300009A05Rik | - |
| DM129 | Cdkn2a-/_C57   | LV.SF.LTR | LIVER       | 9 | 67742625 | - | NM_177184    | Vps13c        | + |
| DM37  | Cdkn2a-/_IFNAR | LV.SF.LTR | LIVER       | 9 | 71779656 | + | NM_011544    | Tcf12         | - |
| DM55  | Cdkn2a-/_IFNAR | LV.SF.LTR | VER - SPLEE | 9 | 72178923 | + | NM_146224    | Suhw4         | + |
| DM40  | Cdkn2a-/_IFNAR | LV.SF.LTR | LIVER       | 9 | 80076244 | + | NM_001039546 | Myo6          | + |
| DM55  | Cdkn2a-/_IFNAR | LV.SF.LTR | VER - SPLEE | 9 | 80121773 | + | NM_001039546 | Myo6          | + |
| DM130 | Cdkn2a-/_C57   | LV.SF.LTR | LIVER       | 9 | 83750448 | + | NM_001110265 | Ttk           | + |
| DM55  | Cdkn2a-/_IFNAR | LV.SF.LTR | VER - SPLEE | 9 | 83950870 | - | NM_199195    | Bckdhh        | + |
| DM50  | Cdkn2a-/_IFNAR | LV.SF.LTR | LIVER       | 9 | 86332318 | + | NM_027394    | Ube2cbp       | - |
| DM56  | Cdkn2a-/_IFNAR | LV.SF.LTR | VER - SPLEE | 9 | 86383318 | - | NM_177208    | Dopey1        | + |
| DM67  | Cdkn2a-/_C57   | LV.SF.LTR | SPLEEN      | 9 | 89986040 | + | NM_001039147 | Morf4l1       | - |
| M206  | Cdkn2a-/_IFNAR | LV.SF.LTR | LIVER       | 9 | 90192621 | - | NM_194334    | Tbc1d2b       | - |
| DM128 | Cdkn2a-/_C57   | LV.SF.LTR | LIVER       | 9 | 90213304 | - | NM_194334    | Tbc1d2b       | - |
| DM67  | Cdkn2a-/_C57   | LV.SF.LTR | LIVER       | 9 | 90233314 | - | NM_194334    | Tbc1d2b       | - |
| DM45  | Cdkn2a-/_IFNAR | LV.SF.LTR | LIVER       | 9 | 90303212 | - | NM_194334    | Tbc1d2b       | - |
| DM67  | Cdkn2a-/_C57   | LV.SF.LTR | SPLEEN      | 9 | 94422147 | - | NM_001033145 | 1190002N15Rik | - |

|       |                 |           |                |    |           |   |              |               |   |
|-------|-----------------|-----------|----------------|----|-----------|---|--------------|---------------|---|
| DM128 | Cdkn2a-/-_C57   | LV.SF.LTR | LIVER          | 9  | 95780518  | + | NM_019864    | Atr           | + |
| DM129 | Cdkn2a-/-_C57   | LV.SF.LTR | LIVER          | 9  | 98266766  | - | NM_144533    | Nmnat3        | + |
| DM54  | Cdkn2a-/-_IFNAR | LV.SF.LTR | LIVER          | 9  | 98306129  | - | NM_144533    | Nmnat3        | + |
| DM128 | Cdkn2a-/-_C57   | LV.SF.LTR | LIVER          | 9  | 100702207 | - | NM_009282    | Stag1         | + |
| DM129 | Cdkn2a-/-_C57   | LV.SF.LTR | LIVER          | 9  | 100791921 | + | NM_009282    | Stag1         | + |
| DM67  | Cdkn2a-/-_C57   | LV.SF.LTR | SPLEEN         | 9  | 100989222 | - | NM_001161362 | 3222402P14Rik | - |
| DM129 | Cdkn2a-/-_C57   | LV.SF.LTR | LIVER          | 9  | 102507519 | - | NM_001081122 | Cep63         | - |
| DM130 | Cdkn2a-/-_C57   | LV.SF.LTR | LIVER          | 9  | 103935502 | + | NM_028721    | Nphp3         | + |
| DM67  | Cdkn2a-/-_C57   | LV.SF.LTR | SPLEEN         | 9  | 109902695 | + | NM_008633    | Mtap4         | + |
| DM119 | Cdkn2a-/-_IFNAR | LV.SF.LTR | LIVER          | 9  | 109904190 | + | NM_008633    | Mtap4         | + |
| DM65  | Cdkn2a-/-_C57   | LV.SF.LTR | LIVER          | 9  | 111064618 | - | NM_027742    | Lrrfip2       | + |
| DM130 | Cdkn2a-/-_C57   | LV.SF.LTR | LIVER          | 9  | 111149214 | + | NM_026810    | Mlh1          | - |
| M206  | Cdkn2a-/-_IFNAR | LV.SF.LTR | LIVER          | 9  | 118585919 | - | NM_133721    | Itga9         | + |
| DM131 | Cdkn2a-/-_C57   | LV.SF.LTR | LIVER          | 9  | 123400850 | - | NM_013860    | Limd1         | + |
| M206  | Cdkn2a-/-_IFNAR | LV.SF.LTR | LIVER          | 9  | 123724911 | + | NM_001110253 | Fyco1         | - |
| DM37  | Cdkn2a-/-_IFNAR | LV.SF.LTR | LIVER          | 9  | 123987195 | - | NM_009915    | Ccr2          | + |
| DM51  | Cdkn2a-/-_IFNAR | LV.SF.LTR | LIVER          | 10 | 8163525   | - | NM_177387    | Ust           | - |
| DM126 | Cdkn2a-/-_C57   | LV.SF.LTR | LIVER          | 10 | 10044223  | - | NM_001127353 | 9130014G24Rik | - |
| DM65  | Cdkn2a-/-_C57   | LV.SF.LTR | LIVER          | 10 | 10913810  | - | NM_172937    | Shprh         | + |
| DM129 | Cdkn2a-/-_C57   | LV.SF.LTR | LIVER          | 10 | 12712843  | - | NM_175102    | Sf3b5         | + |
| DM130 | Cdkn2a-/-_C57   | LV.SF.LTR | LIVER          | 10 | 13761574  | - | NM_010437    | Hivep2        | + |
| DM54  | Cdkn2a-/-_IFNAR | LV.SF.LTR | LIVER          | 10 | 16159363  | - | NM_010828    | Cited2        | + |
| DM55  | Cdkn2a-/-_IFNAR | LV.SF.LTR | LIVER - SPLEEN | 10 | 16173500  | - | NM_010828    | Cited2        | + |
| DM128 | Cdkn2a-/-_C57   | LV.SF.LTR | LIVER          | 10 | 16715126  | - | NM_010828    | Cited2        | + |
| DM37  | Cdkn2a-/-_IFNAR | LV.SF.LTR | LIVER          | 10 | 20322764  | + | NM_013875    | Pde7b         | - |
| DM130 | Cdkn2a-/-_C57   | LV.SF.LTR | LIVER          | 10 | 21433695  | + | NM_011361    | Sgk1          | + |
| DM128 | Cdkn2a-/-_C57   | LV.SF.LTR | LIVER          | 10 | 26524219  | - | NM_176837    | Arhgap18      | + |
| DM130 | Cdkn2a-/-_C57   | LV.SF.LTR | LIVER          | 10 | 28042582  | + | NM_008983    | Ptprk         | + |
| DM128 | Cdkn2a-/-_C57   | LV.SF.LTR | LIVER          | 10 | 28148746  | + | NM_008983    | Ptprk         | + |
| M24   | Cdkn2a-/-_IFNAR | LV.SF.LTR | LIVER          | 10 | 29026944  | + | NM_001110195 | Echdc1        | + |
| M203  | Cdkn2a-/-_IFNAR | LV.SF.LTR | LIVER          | 10 | 29054320  | - | NM_001110195 | Echdc1        | + |



|       |                 |           |              |    |          |   |              |               |   |
|-------|-----------------|-----------|--------------|----|----------|---|--------------|---------------|---|
| DM54  | Cdkn2a-/-_IFNAR | LV.SF.LTR | LIVER        | 10 | 30381175 | + | NM_172495    | Ncoa7         | - |
| DM67  | Cdkn2a-/-_C57   | LV.SF.LTR | SPLEEN       | 10 | 30503965 | + | NM_172495    | Ncoa7         | - |
| DM65  | Cdkn2a-/-_C57   | LV.SF.LTR | LIVER        | 10 | 33654405 | - | NM_028287    | Zufsp         | - |
| DM67  | Cdkn2a-/-_C57   | LV.SF.LTR | LIVER        | 10 | 36707579 | - | NM_008229    | Hdac2         | + |
| DM67  | Cdkn2a-/-_C57   | LV.SF.LTR | SPLEEN       | 10 | 37152552 | + | NM_008538    | Mareks        | - |
| DM129 | Cdkn2a-/-_C57   | LV.SF.LTR | LIVER        | 10 | 39556730 | - | NM_011264    | Rev3l         | + |
| DM65  | Cdkn2a-/-_C57   | LV.SF.LTR | LIVER        | 10 | 39790928 | + | NM_001114332 | Slc16a10      | - |
| DM65  | Cdkn2a-/-_C57   | LV.SF.LTR | LIVER        | 10 | 41003147 | + | NM_133999    | Fig4          | - |
| DM68  | Cdkn2a-/-_C57   | LV.SF.LTR | SPLEEN       | 10 | 41467281 | + | NM_026643    | 2410017P07Rik | - |
| DM131 | Cdkn2a-/-_C57   | LV.SF.LTR | LIVER        | 10 | 42510965 | - | NM_153055    | Sec63         | + |
| DM129 | Cdkn2a-/-_C57   | LV.SF.LTR | LIVER        | 10 | 44087468 | - | NM_053069    | Atg5          | + |
| DM55  | Cdkn2a-/-_IFNAR | LV.SF.LTR | SPLEEN       | 10 | 44148566 | - | NM_007548    | Prdm1         | - |
| DM67  | Cdkn2a-/-_C57   | LV.SF.LTR | LIVER        | 10 | 50348629 | - | NM_001146089 | Ascc3         | + |
| DM67  | Cdkn2a-/-_C57   | LV.SF.LTR | LIVER        | 10 | 51236772 | + | NM_013532    | Lilrb4        | + |
| DM55  | Cdkn2a-/-_IFNAR | LV.SF.LTR | VER - SPLEEN | 10 | 53022369 | - | NM_001141927 | Pln           | + |
| DM45  | Cdkn2a-/-_IFNAR | LV.SF.LTR | LIVER        | 10 | 53043702 | + | NM_001141927 | Pln           | + |
| DM130 | Cdkn2a-/-_C57   | LV.SF.LTR | LIVER        | 10 | 53670073 | - | NM_008548    | Man1a         | - |
| DM128 | Cdkn2a-/-_C57   | LV.SF.LTR | LIVER        | 10 | 56526044 | + | NM_010288    | Gja1          | + |
| DM128 | Cdkn2a-/-_C57   | LV.SF.LTR | LIVER        | 10 | 57409322 | + | NM_001039053 | Pkib          | + |
| DM40  | Cdkn2a-/-_IFNAR | LV.SF.LTR | LIVER        | 10 | 60602280 | + | NM_009163    | Sgpl1         | - |
| DM67  | Cdkn2a-/-_C57   | LV.SF.LTR | SPLEEN       | 10 | 66972637 | - | NM_010118    | Egr2          | + |
| DM131 | Cdkn2a-/-_C57   | LV.SF.LTR | LIVER        | 10 | 70746439 | + | NM_145420    | Ube2d1        | - |
| DM37  | Cdkn2a-/-_IFNAR | LV.SF.LTR | LIVER        | 10 | 74991476 | - | NM_026095    | Snrpd3        | + |
| DM131 | Cdkn2a-/-_C57   | LV.SF.LTR | LIVER        | 10 | 77079419 | - | NM_019929    | Sumo3         | + |
| DM130 | Cdkn2a-/-_C57   | LV.SF.LTR | LIVER        | 10 | 84462039 | - | NM_001013441 | Ric8b         | + |
| DM129 | Cdkn2a-/-_C57   | LV.SF.LTR | LIVER        | 10 | 87175761 | + | NM_008777    | Pah           | + |
| DM128 | Cdkn2a-/-_C57   | LV.SF.LTR | LIVER        | 10 | 87310606 | + | NM_001111275 | Igf1          | + |
| DM131 | Cdkn2a-/-_C57   | LV.SF.LTR | LIVER        | 10 | 87599528 | - | NM_029249    | 4930547N16Rik | - |
| DM31  | Cdkn2a-/-_FVB   | LV.SF.LTR | LIVER        | 10 | 87937662 | + | NM_144807    | Chpt1         | - |
| DM67  | Cdkn2a-/-_C57   | LV.SF.LTR | VER - SPLEEN | 10 | 90460626 | - | NM_001042558 | Apaf1         | - |
| DM65  | Cdkn2a-/-_C57   | LV.SF.LTR | LIVER        | 10 | 90527465 | + | NM_001042558 | Apaf1         | - |

|       |                 |           |               |    |           |   |              |               |   |
|-------|-----------------|-----------|---------------|----|-----------|---|--------------|---------------|---|
| DM129 | Cdkn2a-/-_C57   | LV.SF.LTR | LIVER         | 10 | 93495323  | - | NM_172538    | Vezt          | - |
| DM119 | Cdkn2a-/-_IFNAR | LV.SF.LTR | LIVER         | 10 | 94188143  | + | NM_029852    | Ccde41        | + |
| DM53  | Cdkn2a-/-_IFNAR | LV.SF.LTR | LIVER         | 10 | 98373321  | - | NM_026482    | Atp2b1        | + |
| DM119 | Cdkn2a-/-_IFNAR | LV.SF.LTR | LIVER         | 10 | 98587104  | + | NM_027740    | Wdr51b        | + |
| DM55  | Cdkn2a-/-_IFNAR | LV.SF.LTR | LIVER - SPLEE | 10 | 99965088  | + | NM_146009    | Cep290        | + |
| DM65  | Cdkn2a-/-_C57   | LV.SF.LTR | LIVER         | 10 | 100018018 | - | NM_146009    | Cep290        | + |
| DM131 | Cdkn2a-/-_C57   | LV.SF.LTR | LIVER         | 10 | 100439542 | - | NM_001081246 | 1700017N19Rik | + |
| DM131 | Cdkn2a-/-_C57   | LV.SF.LTR | LIVER         | 10 | 100576345 | - | NM_001081246 | 1700017N19Rik | + |
| DM131 | Cdkn2a-/-_C57   | LV.SF.LTR | LIVER         | 10 | 104976400 | + | NM_177368    | Tmtc2         | - |
| DM49  | Cdkn2a-/-_IFNAR | LV.SF.LTR | LIVER         | 10 | 105394277 | + | NM_025602    | Ccde59        | + |
| DM40  | Cdkn2a-/-_IFNAR | LV.SF.LTR | LIVER         | 10 | 107637145 | - | NM_027892    | Ppp1r12a      | + |
| DM45  | Cdkn2a-/-_IFNAR | LV.SF.LTR | LIVER         | 10 | 107721704 | - | NM_027892    | Ppp1r12a      | + |
| DM129 | Cdkn2a-/-_C57   | LV.SF.LTR | LIVER         | 10 | 110229975 | + | NM_178609    | E2f7          | + |
| DM131 | Cdkn2a-/-_C57   | LV.SF.LTR | LIVER         | 10 | 110573219 | - | NM_001003717 | Osbp18        | + |
| DM40  | Cdkn2a-/-_IFNAR | LV.SF.LTR | LIVER         | 10 | 114828585 | + | NM_001033261 | Zfc3h1        | + |
| DM67  | Cdkn2a-/-_C57   | LV.SF.LTR | LIVER         | 10 | 115933087 | + | NM_001037846 | Cnot2         | - |
| DM126 | Cdkn2a-/-_C57   | LV.SF.LTR | LIVER         | 10 | 116008896 | - | NM_001037846 | Cnot2         | - |
| DM45  | Cdkn2a-/-_IFNAR | LV.SF.LTR | LIVER         | 10 | 116011365 | + | NM_001037846 | Cnot2         | - |
| DM128 | Cdkn2a-/-_C57   | LV.SF.LTR | LIVER         | 10 | 118230768 | - | NM_001014390 | Dyrk2         | - |
| DM55  | Cdkn2a-/-_IFNAR | LV.SF.LTR | LIVER         | 10 | 118236477 | - | NM_001014390 | Dyrk2         | - |
| DM66  | Cdkn2a-/-_C57   | LV.SF.LTR | LIVER         | 10 | 119811964 | + | NM_010441    | Hmga2         | - |
| DM130 | Cdkn2a-/-_C57   | LV.SF.LTR | LIVER         | 10 | 121389919 | - | NM_001081037 | Srgap1        | - |
| DM129 | Cdkn2a-/-_C57   | LV.SF.LTR | LIVER         | 10 | 122601810 | + | NM_027604    | Usp15         | - |
| M23   | Cdkn2a-/-_IFNAR | LV.SF.LTR | LIVER         | 10 | 124781677 | - | NM_011391    | Slc16a7       | - |
| DM130 | Cdkn2a-/-_C57   | LV.SF.LTR | LIVER         | 10 | 127502208 | + | NM_019766    | Ptges3        | + |
| DM51  | Cdkn2a-/-_IFNAR | LV.SF.LTR | LIVER         | 11 | 3046074   | + | NM_030207    | Sfi1          | - |
| DM126 | Cdkn2a-/-_C57   | LV.SF.LTR | LIVER         | 11 | 3055035   | + | NM_030207    | Sfi1          | - |
| DM131 | Cdkn2a-/-_C57   | LV.SF.LTR | LIVER         | 11 | 3100794   | + | NM_023743    | Eif4enif1     | + |
| DM126 | Cdkn2a-/-_C57   | LV.SF.LTR | LIVER         | 11 | 4441876   | - | NM_028860    | Mtmr3         | - |
| DM130 | Cdkn2a-/-_C57   | LV.SF.LTR | LIVER         | 11 | 8576098   | + | NM_001083587 | Tns3          | - |
| DM67  | Cdkn2a-/-_C57   | LV.SF.LTR | LIVER         | 11 | 11648355  | + | NM_001025597 | Ikzf1         | + |

|       |                 |           |             |    |          |   |              |               |   |
|-------|-----------------|-----------|-------------|----|----------|---|--------------|---------------|---|
| DM128 | Cdkn2a-/-_C57   | LV.SF.LTR | LIVER       | 11 | 16460159 | + | NM_001109971 | Sec61g        | - |
| DM130 | Cdkn2a-/-_C57   | LV.SF.LTR | LIVER       | 11 | 16889738 | + | NM_019549    | Plek          | - |
| DM128 | Cdkn2a-/-_C57   | LV.SF.LTR | LIVER       | 11 | 17849645 | - | NM_026576    | Etaal         | - |
| DM130 | Cdkn2a-/-_C57   | LV.SF.LTR | LIVER       | 11 | 20605716 | - | NM_181411    | Aftph         | - |
| DM129 | Cdkn2a-/-_C57   | LV.SF.LTR | LIVER       | 11 | 21009368 | - | NM_023324    | Peli1         | + |
| DM52  | Cdkn2a-/-_IFNAR | LV.SF.LTR | LIVER       | 11 | 21182114 | + | NM_139061    | Vps54         | + |
| DM45  | Cdkn2a-/-_IFNAR | LV.SF.LTR | LIVER       | 11 | 22738321 | - | NM_016888    | B3gnt2        | - |
| DM55  | Cdkn2a-/-_IFNAR | LV.SF.LTR | VER - SPLEE | 11 | 23286518 | + | NM_001035226 | Xpo1          | + |
| DM66  | Cdkn2a-/-_C57   | LV.SF.LTR | LIVER       | 11 | 23390810 | - | NM_172391    | Ahsa2         | - |
| DM67  | Cdkn2a-/-_C57   | LV.SF.LTR | LIVER       | 11 | 23650244 | + | NM_009044    | Rel           | - |
| DM43  | Cdkn2a-/-_IFNAR | LV.SF.LTR | VER - SPLEE | 11 | 26511409 | + | NM_027260    | Vrk2          | - |
| DM31  | Cdkn2a-/-_FVB   | LV.SF.LTR | LIVER       | 11 | 26545966 | - | NM_027260    | Vrk2          | - |
| DM67  | Cdkn2a-/-_C57   | LV.SF.LTR | LIVER       | 11 | 29096625 | + | NM_134034    | Smek2         | + |
| DM56  | Cdkn2a-/-_IFNAR | LV.SF.LTR | VER - SPLEE | 11 | 30985002 | + | NM_023906    | Asb3          | + |
| DM131 | Cdkn2a-/-_C57   | LV.SF.LTR | LIVER       | 11 | 31433430 | - | NM_001024919 | 2310022M17Rik | - |
| DM67  | Cdkn2a-/-_C57   | LV.SF.LTR | SPLEEN      | 11 | 40498226 | + | NM_134017    | Mat2b         | - |
| DM53  | Cdkn2a-/-_IFNAR | LV.SF.LTR | LIVER       | 11 | 40565214 | + | NM_009831    | Ceng1         | - |
| DM67  | Cdkn2a-/-_C57   | LV.SF.LTR | LIVER       | 11 | 43511231 | - | NM_133795    | Ttc1          | - |
| DM129 | Cdkn2a-/-_C57   | LV.SF.LTR | LIVER       | 11 | 44306174 | - | NM_024475    | Ublep1        | - |
| DM128 | Cdkn2a-/-_C57   | LV.SF.LTR | LIVER       | 11 | 44357788 | + | NM_028862    | Rnf145        | + |
| DM40  | Cdkn2a-/-_IFNAR | LV.SF.LTR | LIVER       | 11 | 45673639 | + | NM_001045520 | Clint1        | + |
| DM130 | Cdkn2a-/-_C57   | LV.SF.LTR | LIVER       | 11 | 45716737 | + | NM_001045520 | Clint1        | + |
| DM46  | Cdkn2a-/-_IFNAR | LV.SF.LTR | LIVER       | 11 | 46257578 | - | NM_001104530 | Med7          | + |
| DM50  | Cdkn2a-/-_IFNAR | LV.SF.LTR | LIVER       | 11 | 46278933 | - | NM_134250    | Havcr2        | + |
| DM54  | Cdkn2a-/-_IFNAR | LV.SF.LTR | LIVER       | 11 | 49023781 | - | NM_001024846 | Zfp62         | + |
| DM40  | Cdkn2a-/-_IFNAR | LV.SF.LTR | LIVER       | 11 | 50639531 | - | NM_013922    | Zfp354c       | - |
| DM37  | Cdkn2a-/-_IFNAR | LV.SF.LTR | LIVER       | 11 | 55295155 | - | NM_013716    | G3bp1         | + |
| DM130 | Cdkn2a-/-_C57   | LV.SF.LTR | LIVER       | 11 | 67892826 | - | NM_018768    | Stx8          | + |
| DM54  | Cdkn2a-/-_IFNAR | LV.SF.LTR | LIVER       | 11 | 70611017 | + | NM_001045526 | A430084P05Rik | - |
| DM128 | Cdkn2a-/-_C57   | LV.SF.LTR | LIVER       | 11 | 70989113 | + | NM_001040696 | Nlrp1b        | - |
| DM130 | Cdkn2a-/-_C57   | LV.SF.LTR | LIVER       | 11 | 73134346 | + | NM_023113    | Aspa          | - |

|       |                 |           |             |    |           |   |              |               |   |
|-------|-----------------|-----------|-------------|----|-----------|---|--------------|---------------|---|
| DM37  | Cdkn2a-/-_IFNAR | LV.SF.LTR | LIVER       | 11 | 77089637  | + | NM_177710    | Ssh2          | + |
| DM128 | Cdkn2a-/-_C57   | LV.SF.LTR | LIVER       | 11 | 88880278  | + | NM_009546    | Trim25        | + |
| DM128 | Cdkn2a-/-_C57   | LV.SF.LTR | LIVER       | 11 | 93793984  | - | NM_134012    | Mbtd1         | + |
| DM130 | Cdkn2a-/-_C57   | LV.SF.LTR | LIVER       | 11 | 95299172  | - | NM_025287    | Spop          | + |
| DM66  | Cdkn2a-/-_C57   | LV.SF.LTR | LIVER       | 11 | 95714874  | - | NM_001038664 | Gngt2         | + |
| DM45  | Cdkn2a-/-_IFNAR | LV.SF.LTR | LIVER       | 11 | 102904469 | + | NM_008707    | Nmt1          | + |
| DM130 | Cdkn2a-/-_C57   | LV.SF.LTR | LIVER       | 11 | 104198619 | - | NM_001081045 | 1700081L11Rik | - |
| DM131 | Cdkn2a-/-_C57   | LV.SF.LTR | LIVER       | 11 | 105441040 | - | NM_181071    | Tanc2         | + |
| DM56  | Cdkn2a-/-_IFNAR | LV.SF.LTR | VER - SPLEE | 11 | 106523315 | - | NM_001032378 | Pecam1        | - |
| DM67  | Cdkn2a-/-_C57   | LV.SF.LTR | LIVER       | 11 | 110862697 | + | NM_010604    | Kcnj16        | + |
| DM128 | Cdkn2a-/-_C57   | LV.SF.LTR | LIVER       | 11 | 112987408 | + | NM_027216    | Slc39a11      | - |
| DM45  | Cdkn2a-/-_IFNAR | LV.SF.LTR | LIVER       | 11 | 117050548 | - | NM_001113486 | 9-Sep         | + |
| DM40  | Cdkn2a-/-_IFNAR | LV.SF.LTR | LIVER       | 12 | 3263759   | - | NM_016676    | Rab10         | - |
| DM126 | Cdkn2a-/-_C57   | LV.SF.LTR | LIVER       | 12 | 3465850   | + | NM_172421    | Asxl2         | + |
| DM65  | Cdkn2a-/-_C57   | LV.SF.LTR | LIVER       | 12 | 4382045   | + | NM_010881    | Ncoa1         | - |
| DM128 | Cdkn2a-/-_C57   | LV.SF.LTR | LIVER       | 12 | 4998529   | + | NM_001099628 | Atad2b        | + |
| DM67  | Cdkn2a-/-_C57   | LV.SF.LTR | VER - SPLEE | 12 | 8543992   | + | NM_001038660 | Slc7a15       | - |
| DM40  | Cdkn2a-/-_IFNAR | LV.SF.LTR | LIVER       | 12 | 8742099   | - | NM_001160219 | Pum2          | + |
| DM67  | Cdkn2a-/-_C57   | LV.SF.LTR | VER - SPLEE | 12 | 12290890  | - | NM_001146119 | Fam49a        | + |
| DM52  | Cdkn2a-/-_IFNAR | LV.SF.LTR | LIVER       | 12 | 12348484  | - | NM_001146119 | Fam49a        | + |
| DM35  | Cdkn2a-/-_FVB   | LV.SF.LTR | LIVER       | 12 | 17464309  | + | NM_001008421 | Nol10         | + |
| DM54  | Cdkn2a-/-_IFNAR | LV.SF.LTR | LIVER       | 12 | 21471497  | + | NM_011739    | Ywhaq         | - |
| DM129 | Cdkn2a-/-_C57   | LV.SF.LTR | LIVER       | 12 | 29464131  | + | NM_201357    | Tssc1         | + |
| DM53  | Cdkn2a-/-_IFNAR | LV.SF.LTR | LIVER       | 12 | 32701516  | + | NM_011158    | Prkar2b       | - |
| DM67  | Cdkn2a-/-_C57   | LV.SF.LTR | VER - SPLEE | 12 | 36840271  | - | NM_025840    | Bzw2          | - |
| DM128 | Cdkn2a-/-_C57   | LV.SF.LTR | LIVER       | 12 | 36878072  | - | NM_025840    | Bzw2          | - |
| DM131 | Cdkn2a-/-_C57   | LV.SF.LTR | LIVER       | 12 | 39768156  | - | NM_007960    | Etv1          | + |
| DM126 | Cdkn2a-/-_C57   | LV.SF.LTR | LIVER       | 12 | 40748688  | - | NM_001039515 | Arl4a         | - |
| DM37  | Cdkn2a-/-_IFNAR | LV.SF.LTR | LIVER       | 12 | 41548676  | + | NM_172803    | Dock4         | + |
| DM40  | Cdkn2a-/-_IFNAR | LV.SF.LTR | LIVER       | 12 | 41841378  | - | NM_053122    | Immp2l        | + |
| DM129 | Cdkn2a-/-_C57   | LV.SF.LTR | LIVER       | 12 | 41936591  | - | NM_053122    | Immp2l        | + |

|       |                 |           |                |    |           |   |              |               |   |
|-------|-----------------|-----------|----------------|----|-----------|---|--------------|---------------|---|
| DM67  | Cdkn2a-/-_C57   | LV.SF.LTR | LIVER          | 12 | 42034283  | + | NM_053122    | Immp21        | + |
| DM40  | Cdkn2a-/-_IFNAR | LV.SF.LTR | LIVER          | 12 | 46192947  | + | NM_144552    | Stxbp6        | - |
| M206  | Cdkn2a-/-_IFNAR | LV.SF.LTR | LIVER          | 12 | 47050058  | - | NM_144552    | Stxbp6        | - |
| DM40  | Cdkn2a-/-_IFNAR | LV.SF.LTR | LIVER          | 12 | 47956152  | + | NM_144552    | Stxbp6        | - |
| DM56  | Cdkn2a-/-_IFNAR | LV.SF.LTR | SPLEEN         | 12 | 53623592  | + | NM_009706    | Arhgap5       | + |
| DM128 | Cdkn2a-/-_C57   | LV.SF.LTR | LIVER          | 12 | 56750548  | + | NM_001003719 | Garn11        | - |
| DM130 | Cdkn2a-/-_C57   | LV.SF.LTR | LIVER          | 12 | 58187689  | - | NM_172577    | Slc25a21      | - |
| DM50  | Cdkn2a-/-_IFNAR | LV.SF.LTR | LIVER          | 12 | 58336157  | + | NM_001037746 | AU021838      | + |
| DM40  | Cdkn2a-/-_IFNAR | LV.SF.LTR | LIVER          | 12 | 58338604  | - | NM_001037746 | AU021838      | + |
| DM31  | Cdkn2a-/-_FVB   | LV.SF.LTR | LIVER          | 12 | 59583388  | - | NM_025809    | Clec14a       | - |
| DM67  | Cdkn2a-/-_C57   | LV.SF.LTR | LIVER          | 12 | 60102700  | - | NM_009147    | Sec23a        | - |
| DM40  | Cdkn2a-/-_IFNAR | LV.SF.LTR | LIVER          | 12 | 60107570  | - | NM_009147    | Sec23a        | - |
| DM128 | Cdkn2a-/-_C57   | LV.SF.LTR | LIVER          | 12 | 66057910  | + | NM_025707    | Klh128        | - |
| DM54  | Cdkn2a-/-_IFNAR | LV.SF.LTR | LIVER          | 12 | 66238723  | + | NM_172578    | C79407        | - |
| DM131 | Cdkn2a-/-_C57   | LV.SF.LTR | LIVER          | 12 | 71034723  | + | NM_178628    | At11          | + |
| DM67  | Cdkn2a-/-_C57   | LV.SF.LTR | LIVER          | 12 | 71067603  | + | NM_022028    | Sav1          | - |
| DM37  | Cdkn2a-/-_IFNAR | LV.SF.LTR | LIVER          | 12 | 72197661  | - | NM_001081195 | Arid4a        | + |
| DM55  | Cdkn2a-/-_IFNAR | LV.SF.LTR | LIVER - SPLEEN | 12 | 74411761  | + | NM_029580    | Trmt5         | - |
| DM55  | Cdkn2a-/-_IFNAR | LV.SF.LTR | SPLEEN         | 12 | 76590371  | - | NM_012024    | Ppp2r5e       | - |
| DM51  | Cdkn2a-/-_IFNAR | LV.SF.LTR | LIVER          | 12 | 79624368  | + | NM_172952    | Gphn          | + |
| DM129 | Cdkn2a-/-_C57   | LV.SF.LTR | LIVER          | 12 | 79914372  | + | NM_019579    | Mpp5          | + |
| DM67  | Cdkn2a-/-_C57   | LV.SF.LTR | LIVER          | 12 | 82855493  | + | NM_177395    | Map3k9        | - |
| DM129 | Cdkn2a-/-_C57   | LV.SF.LTR | LIVER          | 12 | 83490816  | - | NM_172579    | Sipa111       | + |
| DM37  | Cdkn2a-/-_IFNAR | LV.SF.LTR | LIVER          | 12 | 85341766  | - | NM_134188    | Acot2         | + |
| DM128 | Cdkn2a-/-_C57   | LV.SF.LTR | LIVER          | 12 | 92335724  | - | NM_181815    | 4930534B04Rik | - |
| DM37  | Cdkn2a-/-_IFNAR | LV.SF.LTR | LIVER          | 12 | 93974535  | - | NM_001039089 | Sel11         | - |
| DM129 | Cdkn2a-/-_C57   | LV.SF.LTR | LIVER          | 12 | 95631377  | + | NM_201518    | Flrt2         | + |
| DM129 | Cdkn2a-/-_C57   | LV.SF.LTR | LIVER          | 12 | 100079141 | + | NM_001081191 | Eml5          | - |
| DM68  | Cdkn2a-/-_C57   | LV.SF.LTR | SPLEEN         | 12 | 100918615 | - | NM_030172    | 2610021K21Rik | - |
| DM126 | Cdkn2a-/-_C57   | LV.SF.LTR | LIVER          | 12 | 101931586 | - | NM_153587    | Rps6ka5       | - |
| DM65  | Cdkn2a-/-_C57   | LV.SF.LTR | LIVER          | 12 | 105414862 | + | NM_008458    | Serpina3c     | - |

|       |                 |           |              |    |           |   |              |               |   |
|-------|-----------------|-----------|--------------|----|-----------|---|--------------|---------------|---|
| DM40  | Cdkn2a-/-_IFNAR | LV.SF.LTR | LIVER        | 12 | 106277422 | - | NM_028419    | Glrx5         | + |
| DM66  | Cdkn2a-/-_C57   | LV.SF.LTR | LIVER        | 12 | 112097692 | + | NM_026048    | 2810452K22Rik | - |
| DM56  | Cdkn2a-/-_IFNAR | LV.SF.LTR | VER - SPLEEN | 12 | 117552829 | - | NM_028731    | Fam62b        | + |
| DM55  | Cdkn2a-/-_IFNAR | LV.SF.LTR | VER - SPLEEN | 12 | 117563130 | + | NM_028731    | Fam62b        | + |
| DM56  | Cdkn2a-/-_IFNAR | LV.SF.LTR | VER - SPLEEN | 12 | 117701093 | + | NM_133762    | Ncapp2        | + |
| DM130 | Cdkn2a-/-_C57   | LV.SF.LTR | LIVER        | 12 | 119114747 | + | NM_146040    | Cdca7l        | + |
| DM130 | Cdkn2a-/-_C57   | LV.SF.LTR | LIVER        | 12 | 120385125 | + | NM_177290    | Itgb8         | - |
| DM130 | Cdkn2a-/-_C57   | LV.SF.LTR | LIVER        | 13 | 5521612   | + | NM_011803    | Klf6          | + |
| DM131 | Cdkn2a-/-_C57   | LV.SF.LTR | LIVER        | 13 | 5531773   | - | NM_011803    | Klf6          | + |
| DM65  | Cdkn2a-/-_C57   | LV.SF.LTR | LIVER        | 13 | 5720025   | - | NM_011803    | Klf6          | + |
| DM54  | Cdkn2a-/-_IFNAR | LV.SF.LTR | LIVER        | 13 | 6027774   | + | NM_011803    | Klf6          | + |
| DM51  | Cdkn2a-/-_IFNAR | LV.SF.LTR | LIVER        | 13 | 6282215   | + | NM_145131    | Pitrm1        | + |
| DM119 | Cdkn2a-/-_IFNAR | LV.SF.LTR | LIVER        | 13 | 12508031  | + | NM_144835    | Heatr1        | + |
| DM66  | Cdkn2a-/-_C57   | LV.SF.LTR | LIVER        | 13 | 17069059  | + | NM_138654    | 5033411D12Rik | - |
| DM33  | Cdkn2a-/-_FVB   | LV.SF.LTR | LIVER        | 13 | 21259940  | + | NM_009054    | Trim27        | + |
| DM130 | Cdkn2a-/-_C57   | LV.SF.LTR | LIVER        | 13 | 33024845  | - | NM_011454    | Serpnb6b      | + |
| DM55  | Cdkn2a-/-_IFNAR | LV.SF.LTR | LIVER        | 13 | 34400876  | - | NM_001033167 | Slc22a23      | - |
| DM67  | Cdkn2a-/-_C57   | LV.SF.LTR | SPLEEN       | 13 | 34979393  | + | NM_013830    | Prpf4b        | + |
| DM35  | Cdkn2a-/-_FVB   | LV.SF.LTR | LIVER        | 13 | 36217030  | + | NM_001039189 | Fars2         | + |
| DM65  | Cdkn2a-/-_C57   | LV.SF.LTR | LIVER        | 13 | 37940804  | + | NM_001039188 | Rreb1         | + |
| DM67  | Cdkn2a-/-_C57   | LV.SF.LTR | VER - SPLEEN | 13 | 46050122  | - | NM_009124    | Atxn1         | - |
| DM130 | Cdkn2a-/-_C57   | LV.SF.LTR | LIVER        | 13 | 49522678  | - | NM_199056    | Ippk          | + |
| DM128 | Cdkn2a-/-_C57   | LV.SF.LTR | LIVER        | 13 | 49720385  | + | NM_025495    | Cenpp         | - |
| DM40  | Cdkn2a-/-_IFNAR | LV.SF.LTR | LIVER        | 13 | 56823141  | + | NM_008541    | Smad5         | + |
| DM28  | Cdkn2a-/-_FVB   | LV.SF.LTR | LIVER        | 13 | 61913451  | + | NM_026906    | Cts3          | - |
| DM130 | Cdkn2a-/-_C57   | LV.SF.LTR | LIVER        | 13 | 70736549  | - | NM_172053    | Adamts16      | - |
| DM130 | Cdkn2a-/-_C57   | LV.SF.LTR | LIVER        | 13 | 75867606  | + | NM_138953    | Ell2          | + |
| DM56  | Cdkn2a-/-_IFNAR | LV.SF.LTR | VER - SPLEEN | 13 | 75870769  | - | NM_138953    | Ell2          | + |
| DM56  | Cdkn2a-/-_IFNAR | LV.SF.LTR | VER - SPLEEN | 13 | 78103131  | + | NM_010151    | Nr2f1         | - |
| DM33  | Cdkn2a-/-_FVB   | LV.SF.LTR | LIVER        | 13 | 78188028  | + | NM_010151    | Nr2f1         | - |
| DM129 | Cdkn2a-/-_C57   | LV.SF.LTR | LIVER        | 13 | 81926819  | + | NM_007684    | Cetn3         | + |

|       |                 |           |               |    |           |   |              |               |   |
|-------|-----------------|-----------|---------------|----|-----------|---|--------------|---------------|---|
| DM128 | Cdkn2a-/-_C57   | LV.SF.LTR | LIVER         | 13 | 81936560  | + | NM_007684    | Cetn3         | + |
| DM45  | Cdkn2a-/-_IFNAR | LV.SF.LTR | LIVER         | 13 | 83293674  | + | NM_025282    | Mef2c         | + |
| DM65  | Cdkn2a-/-_C57   | LV.SF.LTR | LIVER         | 13 | 83665860  | + | NM_025282    | Mef2c         | + |
| DM129 | Cdkn2a-/-_C57   | LV.SF.LTR | LIVER         | 13 | 83693295  | - | NM_025282    | Mef2c         | + |
| DM128 | Cdkn2a-/-_C57   | LV.SF.LTR | LIVER         | 13 | 83697274  | + | NM_025282    | Mef2c         | + |
| DM131 | Cdkn2a-/-_C57   | LV.SF.LTR | LIVER         | 13 | 83708204  | + | NM_025282    | Mef2c         | + |
| DM40  | Cdkn2a-/-_IFNAR | LV.SF.LTR | LIVER         | 13 | 84422838  | - | NM_175187    | Tmem161b      | + |
| DM130 | Cdkn2a-/-_C57   | LV.SF.LTR | LIVER         | 13 | 84436196  | - | NM_175187    | Tmem161b      | + |
| DM40  | Cdkn2a-/-_IFNAR | LV.SF.LTR | LIVER         | 13 | 85369679  | + | NM_145452    | Rasa1         | - |
| DM131 | Cdkn2a-/-_C57   | LV.SF.LTR | LIVER         | 13 | 85390622  | + | NM_145452    | Rasa1         | - |
| DM129 | Cdkn2a-/-_C57   | LV.SF.LTR | LIVER         | 13 | 89893099  | + | NM_001081249 | Vcan          | - |
| DM128 | Cdkn2a-/-_C57   | LV.SF.LTR | LIVER         | 13 | 90016468  | - | NM_028012    | Xrcc4         | - |
| DM51  | Cdkn2a-/-_IFNAR | LV.SF.LTR | LIVER         | 13 | 92998448  | + | NM_010829    | Msh3          | - |
| M206  | Cdkn2a-/-_IFNAR | LV.SF.LTR | LIVER         | 13 | 93498916  | - | NM_172588    | Serinc5       | + |
| DM40  | Cdkn2a-/-_IFNAR | LV.SF.LTR | LIVER         | 13 | 93973916  | - | NM_133905    | Papd4         | - |
| DM130 | Cdkn2a-/-_C57   | LV.SF.LTR | LIVER         | 13 | 93998196  | - | NM_133905    | Papd4         | - |
| DM35  | Cdkn2a-/-_FVB   | LV.SF.LTR | LIVER         | 13 | 97335317  | - | NM_023420    | Col4a3bp      | + |
| DM40  | Cdkn2a-/-_IFNAR | LV.SF.LTR | LIVER         | 13 | 99553564  | + | NM_172591    | Fcho2         | - |
| DM67  | Cdkn2a-/-_C57   | LV.SF.LTR | LIVER - SPLEE | 13 | 102792424 | + | NM_001077495 | Pik3r1        | - |
| DM128 | Cdkn2a-/-_C57   | LV.SF.LTR | LIVER         | 13 | 104605454 | - | NM_001005868 | Erb2ip        | - |
| M208  | Cdkn2a-/-_IFNAR | LV.SF.LTR | LIVER         | 13 | 105518601 | + | NM_026072    | Sdccag10      | - |
| DM40  | Cdkn2a-/-_IFNAR | LV.SF.LTR | LIVER         | 13 | 105591707 | - | NM_026072    | Sdccag10      | - |
| DM67  | Cdkn2a-/-_C57   | LV.SF.LTR | LIVER         | 13 | 105920761 | - | NM_025751    | 4933425L06Rik | + |
| DM130 | Cdkn2a-/-_C57   | LV.SF.LTR | LIVER         | 13 | 109161618 | + | NM_178683    | Depdc1b       | + |
| DM54  | Cdkn2a-/-_IFNAR | LV.SF.LTR | LIVER         | 13 | 112274877 | + | NM_001122963 | Gbp1          | - |
| DM45  | Cdkn2a-/-_IFNAR | LV.SF.LTR | LIVER         | 13 | 114845528 | + | NM_172595    | Arl15         | + |
| DM67  | Cdkn2a-/-_C57   | LV.SF.LTR | LIVER         | 13 | 115922255 | - | NM_001033228 | Itga1         | - |
| DM128 | Cdkn2a-/-_C57   | LV.SF.LTR | LIVER         | 13 | 116005030 | - | NM_001033228 | Itga1         | - |
| DM126 | Cdkn2a-/-_C57   | LV.SF.LTR | LIVER         | 13 | 117665122 | - | NM_001081009 | Parp8         | - |
| DM130 | Cdkn2a-/-_C57   | LV.SF.LTR | LIVER         | 13 | 117731169 | - | NM_001081009 | Parp8         | - |
| DM130 | Cdkn2a-/-_C57   | LV.SF.LTR | LIVER         | 13 | 117968786 | + | NM_010330    | Emb           | + |

|       |                 |           |              |    |           |   |              |               |   |
|-------|-----------------|-----------|--------------|----|-----------|---|--------------|---------------|---|
| DM66  | Cdkn2a-/-_C57   | LV.SF.LTR | LIVER        | 13 | 119301347 | - | NM_021556    | Mrps30        | - |
| DM33  | Cdkn2a-/-_FVB   | LV.SF.LTR | LIVER        | 13 | 120159742 | - | NR_003544    | Nnt           | - |
| DM65  | Cdkn2a-/-_C57   | LV.SF.LTR | LIVER        | 14 | 8718617   | + | NM_134080    | Flnb          | + |
| DM40  | Cdkn2a-/-_IFNAR | LV.SF.LTR | LIVER        | 14 | 8740370   | + | NM_134080    | Flnb          | + |
| DM130 | Cdkn2a-/-_C57   | LV.SF.LTR | LIVER        | 14 | 15550065  | - | NM_001033270 | Slc4a7        | + |
| DM67  | Cdkn2a-/-_C57   | LV.SF.LTR | LIVER        | 14 | 15612652  | - | NM_001033270 | Slc4a7        | + |
| DM40  | Cdkn2a-/-_IFNAR | LV.SF.LTR | LIVER        | 14 | 17206647  | + | NM_009409    | Top2b         | + |
| DM119 | Cdkn2a-/-_IFNAR | LV.SF.LTR | LIVER        | 14 | 17219403  | - | NM_009409    | Top2b         | + |
| DM130 | Cdkn2a-/-_C57   | LV.SF.LTR | LIVER        | 14 | 17222124  | - | NM_009409    | Top2b         | + |
| DM40  | Cdkn2a-/-_IFNAR | LV.SF.LTR | LIVER        | 14 | 17939839  | - | NM_011243    | Rarb          | - |
| DM53  | Cdkn2a-/-_IFNAR | LV.SF.LTR | LIVER        | 14 | 20839059  | + | NM_001038637 | Gng2          | - |
| DM40  | Cdkn2a-/-_IFNAR | LV.SF.LTR | LIVER        | 14 | 22123414  | + | NM_134079    | Adk           | + |
| DM66  | Cdkn2a-/-_C57   | LV.SF.LTR | LIVER        | 14 | 26250450  | + | NM_183208    | Zmiz1         | + |
| DM65  | Cdkn2a-/-_C57   | LV.SF.LTR | LIVER        | 14 | 27436153  | + | NM_145969    | Fam116a       | + |
| DM45  | Cdkn2a-/-_IFNAR | LV.SF.LTR | LIVER        | 14 | 28053623  | - | NM_027871    | Arhgef3       | + |
| DM128 | Cdkn2a-/-_C57   | LV.SF.LTR | LIVER        | 14 | 31561518  | + | NM_019460    | Sfmbt1        | + |
| DM56  | Cdkn2a-/-_IFNAR | LV.SF.LTR | VER - SPLEEN | 14 | 32638587  | + | NM_001024604 | Ankrd28       | - |
| DM126 | Cdkn2a-/-_C57   | LV.SF.LTR | LIVER        | 14 | 33686106  | + | NM_178791    | E130203B14Rik | + |
| DM55  | Cdkn2a-/-_IFNAR | LV.SF.LTR | LIVER        | 14 | 35553556  | - | NM_001004436 | Wapal         | + |
| M206  | Cdkn2a-/-_IFNAR | LV.SF.LTR | LIVER        | 14 | 37775973  | + | NM_027045    | Gcap14        | - |
| DM129 | Cdkn2a-/-_C57   | LV.SF.LTR | LIVER        | 14 | 37940574  | + | NM_078478    | Ghitm         | - |
| DM128 | Cdkn2a-/-_C57   | LV.SF.LTR | LIVER        | 14 | 45763981  | + | NM_172597    | Txndc16       | - |
| DM66  | Cdkn2a-/-_C57   | LV.SF.LTR | LIVER        | 14 | 45914601  | + | NM_015774    | Ero11         | - |
| DM37  | Cdkn2a-/-_IFNAR | LV.SF.LTR | LIVER        | 14 | 47126480  | + | NM_007554    | Bmp4          | - |
| DM55  | Cdkn2a-/-_IFNAR | LV.SF.LTR | SPLEEN       | 14 | 48180945  | - | NM_172599    | D14Erd436e    | - |
| DM66  | Cdkn2a-/-_C57   | LV.SF.LTR | LIVER        | 14 | 49674694  | - | NM_207214    | Exoc5         | - |
| DM40  | Cdkn2a-/-_IFNAR | LV.SF.LTR | LIVER        | 14 | 49680218  | - | NM_207214    | Exoc5         | - |
| M203  | Cdkn2a-/-_IFNAR | LV.SF.LTR | LIVER        | 14 | 49794389  | + | NM_001081430 | Nat12         | + |
| DM68  | Cdkn2a-/-_C57   | LV.SF.LTR | SPLEEN       | 14 | 49799669  | + | NM_001081430 | Nat12         | + |
| DM130 | Cdkn2a-/-_C57   | LV.SF.LTR | LIVER        | 14 | 49799873  | - | NM_001081430 | Nat12         | + |
| DM51  | Cdkn2a-/-_IFNAR | LV.SF.LTR | LIVER        | 14 | 57998181  | + | NM_030004    | Cry11         | - |



|       |                 |           |              |    |           |   |              |               |   |
|-------|-----------------|-----------|--------------|----|-----------|---|--------------|---------------|---|
| DM130 | Cdkn2a-/-_C57   | LV.SF.LTR | LIVER        | 14 | 58263390  | - | NM_020506    | Xpo4          | - |
| DM65  | Cdkn2a-/-_C57   | LV.SF.LTR | LIVER        | 14 | 67636182  | - | NM_028032    | Ppp2r2a       | - |
| DM130 | Cdkn2a-/-_C57   | LV.SF.LTR | LIVER        | 14 | 67719576  | + | NM_028032    | Ppp2r2a       | - |
| DM40  | Cdkn2a-/-_IFNAR | LV.SF.LTR | LIVER        | 14 | 68355591  | - | NM_001111028 | Kctd9         | + |
| DM67  | Cdkn2a-/-_C57   | LV.SF.LTR | LIVER        | 14 | 71370818  | - | NM_008115    | Gfra2         | + |
| DM51  | Cdkn2a-/-_IFNAR | LV.SF.LTR | LIVER        | 14 | 73598893  | - | NM_009029    | Rb1           | - |
| DM65  | Cdkn2a-/-_C57   | LV.SF.LTR | LIVER        | 14 | 73790489  | - | NM_008410    | Itm2b         | - |
| DM46  | Cdkn2a-/-_IFNAR | LV.SF.LTR | LIVER        | 14 | 76499035  | - | NM_026177    | 1200011I18Rik | - |
| DM67  | Cdkn2a-/-_C57   | LV.SF.LTR | SPLEEN       | 14 | 79089960  | + | NM_001081336 | Dgkh          | - |
| DM34  | Cdkn2a-/-_FVB   | LV.SF.LTR | LIVER        | 14 | 79368505  | - | NM_173758    | 1300010F03Rik | + |
| DM129 | Cdkn2a-/-_C57   | LV.SF.LTR | LIVER        | 14 | 79783599  | - | NM_025832    | Narg1l        | - |
| DM131 | Cdkn2a-/-_C57   | LV.SF.LTR | LIVER        | 14 | 79928089  | + | NM_007920    | Elf1          | + |
| DM56  | Cdkn2a-/-_IFNAR | LV.SF.LTR | SPLEEN       | 14 | 79988700  | - | NM_026474    | Sugt1         | + |
| DM67  | Cdkn2a-/-_C57   | LV.SF.LTR | LIVER        | 14 | 87204108  | + | NM_019670    | Diap3         | - |
| DM130 | Cdkn2a-/-_C57   | LV.SF.LTR | LIVER        | 14 | 87824179  | + | NM_172605    | Tdrd3         | + |
| DM67  | Cdkn2a-/-_C57   | LV.SF.LTR | SPLEEN       | 14 | 87830362  | + | NM_172605    | Tdrd3         | + |
| DM40  | Cdkn2a-/-_IFNAR | LV.SF.LTR | LIVER        | 14 | 87885204  | - | NM_172605    | Tdrd3         | + |
| DM126 | Cdkn2a-/-_C57   | LV.SF.LTR | LIVER        | 14 | 87890507  | + | NM_172605    | Tdrd3         | + |
| DM67  | Cdkn2a-/-_C57   | LV.SF.LTR | SPLEEN       | 14 | 90150436  | - | NR_002862    | Gm5088        | + |
| DM126 | Cdkn2a-/-_C57   | LV.SF.LTR | LIVER        | 14 | 90190619  | + | NR_002862    | Gm5088        | + |
| DM128 | Cdkn2a-/-_C57   | LV.SF.LTR | LIVER        | 14 | 103706954 | + | NM_207215    | Mycbp2        | - |
| DM67  | Cdkn2a-/-_C57   | LV.SF.LTR | SPLEEN       | 14 | 104908180 | - | NM_026047    | Rnf219        | - |
| DM40  | Cdkn2a-/-_IFNAR | LV.SF.LTR | LIVER        | 14 | 105554181 | - | NM_134077    | Rbm26         | - |
| DM130 | Cdkn2a-/-_C57   | LV.SF.LTR | LIVER        | 14 | 105706710 | - | NM_029561    | Ndfip2        | + |
| DM51  | Cdkn2a-/-_IFNAR | LV.SF.LTR | LIVER        | 14 | 118100746 | + | NM_001079844 | Gpc6          | + |
| DM67  | Cdkn2a-/-_C57   | LV.SF.LTR | SPLEEN       | 14 | 120736945 | + | NM_175341    | Mbnl2         | + |
| DM55  | Cdkn2a-/-_IFNAR | LV.SF.LTR | VER - SPLEEN | 14 | 122516502 | + | NM_080556    | Tm9sf2        | + |
| DM119 | Cdkn2a-/-_IFNAR | LV.SF.LTR | LIVER        | 14 | 122565371 | - | NM_080556    | Tm9sf2        | + |
| DM40  | Cdkn2a-/-_IFNAR | LV.SF.LTR | LIVER        | 14 | 122962678 | + | NM_144844    | Pcca          | + |
| DM130 | Cdkn2a-/-_C57   | LV.SF.LTR | LIVER        | 14 | 123079916 | - | NM_144844    | Pcca          | + |
| DM65  | Cdkn2a-/-_C57   | LV.SF.LTR | LIVER        | 14 | 123318930 | - | NM_028651    | Tmtc4         | - |

|       |                |           |        |    |          |   |              |               |   |
|-------|----------------|-----------|--------|----|----------|---|--------------|---------------|---|
| DM119 | Cdkn2a-/_IFNAR | LV.SF.LTR | LIVER  | 15 | 3826413  | + | NM_134099    | Fbxo4         | - |
| DM126 | Cdkn2a-/_C57   | LV.SF.LTR | LIVER  | 15 | 3935941  | - | NM_145930    | AW549877      | - |
| DM128 | Cdkn2a-/_C57   | LV.SF.LTR | LIVER  | 15 | 4759314  | - | NM_016704    | C6            | + |
| DM40  | Cdkn2a-/_IFNAR | LV.SF.LTR | LIVER  | 15 | 6749552  | + | NM_030168    | Rictor        | + |
| DM128 | Cdkn2a-/_C57   | LV.SF.LTR | LIVER  | 15 | 8350616  | + | NM_027707    | Nipbl         | - |
| DM130 | Cdkn2a-/_C57   | LV.SF.LTR | LIVER  | 15 | 8699753  | - | NM_148938    | Slc1a3        | - |
| DM45  | Cdkn2a-/_IFNAR | LV.SF.LTR | LIVER  | 15 | 9353395  | + | NM_029341    | Capsl         | + |
| DM46  | Cdkn2a-/_IFNAR | LV.SF.LTR | LIVER  | 15 | 10393930 | + | NM_030046    | Dnajc21       | - |
| DM51  | Cdkn2a-/_IFNAR | LV.SF.LTR | LIVER  | 15 | 11922309 | - | NM_011294    | Sub1          | - |
| DM35  | Cdkn2a-/_FVB   | LV.SF.LTR | SPLEEN | 15 | 12744974 | - | NM_029998    | 6030458C11Rik | - |
| DM49  | Cdkn2a-/_IFNAR | LV.SF.LTR | LIVER  | 15 | 12792332 | - | NM_001130149 | Rnasen        | + |
| DM66  | Cdkn2a-/_C57   | LV.SF.LTR | LIVER  | 15 | 19713877 | + | NM_009865    | Cdh10         | + |
| DM126 | Cdkn2a-/_C57   | LV.SF.LTR | LIVER  | 15 | 19800626 | + | NM_022816    | Acot10        | - |
| DM67  | Cdkn2a-/_C57   | LV.SF.LTR | LIVER  | 15 | 19801367 | + | NM_022816    | Acot10        | - |
| DM67  | Cdkn2a-/_C57   | LV.SF.LTR | LIVER  | 15 | 19808643 | + | NM_022816    | Acot10        | - |
| DM129 | Cdkn2a-/_C57   | LV.SF.LTR | LIVER  | 15 | 27678513 | - | NM_001081302 | Trio          | - |
| M23   | Cdkn2a-/_IFNAR | LV.SF.LTR | LIVER  | 15 | 27748328 | - | NM_001081302 | Trio          | - |
| DM129 | Cdkn2a-/_C57   | LV.SF.LTR | LIVER  | 15 | 27915441 | - | NM_001081302 | Trio          | - |
| DM67  | Cdkn2a-/_C57   | LV.SF.LTR | SPLEEN | 15 | 28338358 | + | NM_133365    | Dnahc5        | + |
| DM40  | Cdkn2a-/_IFNAR | LV.SF.LTR | LIVER  | 15 | 34445195 | + | NM_026340    | Pop1          | + |
| DM65  | Cdkn2a-/_C57   | LV.SF.LTR | LIVER  | 15 | 34929777 | + | NM_019635    | Stk3          | - |
| DM129 | Cdkn2a-/_C57   | LV.SF.LTR | LIVER  | 15 | 40782638 | - | NM_011766    | Zfpm2         | + |
| DM40  | Cdkn2a-/_IFNAR | LV.SF.LTR | LIVER  | 15 | 40791511 | + | NM_011766    | Zfpm2         | + |
| DM45  | Cdkn2a-/_IFNAR | LV.SF.LTR | LIVER  | 15 | 41565933 | + | NM_001130166 | Oxr1          | + |
| DM129 | Cdkn2a-/_C57   | LV.SF.LTR | LIVER  | 15 | 44229940 | - | NM_001113554 | Nudcd1        | - |
| DM38  | Cdkn2a-/_FVB   | LV.SF.LTR | LIVER  | 15 | 44237742 | + | NM_001113554 | Nudcd1        | - |
| DM130 | Cdkn2a-/_C57   | LV.SF.LTR | LIVER  | 15 | 49936170 | - | NM_032000    | Trps1         | - |
| DM128 | Cdkn2a-/_C57   | LV.SF.LTR | LIVER  | 15 | 50449101 | + | NM_032000    | Trps1         | - |
| DM54  | Cdkn2a-/_IFNAR | LV.SF.LTR | LIVER  | 15 | 50724580 | - | NM_032000    | Trps1         | - |
| DM54  | Cdkn2a-/_IFNAR | LV.SF.LTR | LIVER  | 15 | 51655743 | + | NM_080635    | Eif3h         | - |
| DM128 | Cdkn2a-/_C57   | LV.SF.LTR | LIVER  | 15 | 57881537 | - | NM_001042438 | Zhx1          | - |

|       |                 |           |                |    |           |   |              |               |   |
|-------|-----------------|-----------|----------------|----|-----------|---|--------------|---------------|---|
| DM128 | Cdkn2a-/-_C57   | LV.SF.LTR | LIVER          | 15 | 61763256  | + | NM_010849    | Myc           | + |
| DM30  | Cdkn2a-/-_FVB   | LV.SF.LTR | LIVER          | 15 | 64938967  | + | NM_009623    | Adcy8         | - |
| DM130 | Cdkn2a-/-_C57   | LV.SF.LTR | LIVER          | 15 | 65657082  | + | NM_133766    | Efr3a         | + |
| DM129 | Cdkn2a-/-_C57   | LV.SF.LTR | LIVER          | 15 | 67721200  | + | NM_001145888 | Zfat          | - |
| DM65  | Cdkn2a-/-_C57   | LV.SF.LTR | LIVER          | 15 | 68174331  | - | NM_001145888 | Zfat          | - |
| DM126 | Cdkn2a-/-_C57   | LV.SF.LTR | LIVER          | 15 | 69380774  | + | NM_010158    | Khdrbs3       | + |
| DM65  | Cdkn2a-/-_C57   | LV.SF.LTR | LIVER          | 15 | 72503061  | - | NM_029640    | Trappc9       | - |
| DM37  | Cdkn2a-/-_IFNAR | LV.SF.LTR | LIVER          | 15 | 76150750  | + | NM_175399    | Exosc4        | + |
| DM128 | Cdkn2a-/-_C57   | LV.SF.LTR | LIVER          | 15 | 81421002  | - | NM_177821    | Ep300         | + |
| DM129 | Cdkn2a-/-_C57   | LV.SF.LTR | LIVER          | 15 | 84800041  | - | NM_001033273 | 5031439G07Rik | - |
| DM129 | Cdkn2a-/-_C57   | LV.SF.LTR | LIVER          | 15 | 90438523  | - | NM_025815    | Cpne8         | - |
| DM50  | Cdkn2a-/-_IFNAR | LV.SF.LTR | LIVER          | 15 | 90483431  | - | NM_001033851 | Cpne8         | - |
| DM130 | Cdkn2a-/-_C57   | LV.SF.LTR | LIVER          | 15 | 93163248  | - | NM_024189    | Yaf2          | - |
| DM130 | Cdkn2a-/-_C57   | LV.SF.LTR | LIVER          | 15 | 96461202  | + | NM_134086    | Slc38a1       | - |
| DM67  | Cdkn2a-/-_C57   | LV.SF.LTR | LIVER          | 15 | 101120334 | - | NM_026566    | 9430023L20Rik | + |
| DM40  | Cdkn2a-/-_IFNAR | LV.SF.LTR | LIVER          | 15 | 101917787 | + | NM_145625    | Eif4b         | + |
| DM129 | Cdkn2a-/-_C57   | LV.SF.LTR | LIVER          | 16 | 3865365   | + | NM_001033159 | Zfp597        | - |
| DM128 | Cdkn2a-/-_C57   | LV.SF.LTR | LIVER          | 16 | 16572420  | + | NM_139234    | Fgd4          | - |
| DM43  | Cdkn2a-/-_IFNAR | LV.SF.LTR | LIVER - SPLEEN | 16 | 16805836  | - | NM_015773    | Spag6         | - |
| DM65  | Cdkn2a-/-_C57   | LV.SF.LTR | LIVER          | 16 | 16987652  | + | NM_001038663 | Mapk1         | + |
| DM65  | Cdkn2a-/-_C57   | LV.SF.LTR | LIVER          | 16 | 19960525  | + | NM_183390    | Klhl6         | - |
| DM66  | Cdkn2a-/-_C57   | LV.SF.LTR | LIVER          | 16 | 20024797  | - | NM_183390    | Klhl6         | - |
| DM65  | Cdkn2a-/-_C57   | LV.SF.LTR | LIVER          | 16 | 22430957  | + | NM_023794    | Etv5          | - |
| DM45  | Cdkn2a-/-_IFNAR | LV.SF.LTR | LIVER          | 16 | 30349200  | - | NM_001128094 | Atp13a3       | - |
| DM129 | Cdkn2a-/-_C57   | LV.SF.LTR | LIVER          | 16 | 30381165  | + | NM_001128094 | Atp13a3       | - |
| DM37  | Cdkn2a-/-_IFNAR | LV.SF.LTR | LIVER          | 16 | 32191934  | + | NM_001033539 | Bex6          | + |
| DM46  | Cdkn2a-/-_IFNAR | LV.SF.LTR | LIVER          | 16 | 36581112  | - | NM_013803    | Casr          | - |
| DM131 | Cdkn2a-/-_C57   | LV.SF.LTR | LIVER          | 16 | 36881408  | - | NM_030035    | Golgb1        | + |
| DM30  | Cdkn2a-/-_FVB   | LV.SF.LTR | LIVER          | 16 | 43035874  | + | NR_002445    | BC002163      | + |
| DM66  | Cdkn2a-/-_C57   | LV.SF.LTR | LIVER          | 16 | 43569507  | - | NM_019778    | Zbtb20        | + |
| DM45  | Cdkn2a-/-_IFNAR | LV.SF.LTR | LIVER          | 16 | 44783858  | - | NM_021325    | Cd200r1       | + |

|       |                 |           |             |    |          |   |              |            |   |
|-------|-----------------|-----------|-------------|----|----------|---|--------------|------------|---|
| DM67  | Cdkn2a-/-_C57   | LV.SF.LTR | LIVER       | 16 | 52043547 | - | NM_001033238 | Cblb       | + |
| DM37  | Cdkn2a-/-_IFNAR | LV.SF.LTR | LIVER       | 16 | 54795226 | + | NM_178720    | Zpld1      | - |
| DM130 | Cdkn2a-/-_C57   | LV.SF.LTR | LIVER       | 16 | 55792971 | + | NM_001159394 | Nfkbiz     | - |
| DM37  | Cdkn2a-/-_IFNAR | LV.SF.LTR | LIVER       | 16 | 55915577 | + | NM_028815    | Cep97      | - |
| DM67  | Cdkn2a-/-_C57   | LV.SF.LTR | SPLEEN      | 16 | 57225614 | + | NM_026254    | Tbc1d23    | - |
| DM45  | Cdkn2a-/-_IFNAR | LV.SF.LTR | LIVER       | 16 | 58019674 | + | NM_007739    | Col8a1     | - |
| DM67  | Cdkn2a-/-_C57   | LV.SF.LTR | VER - SPLEE | 16 | 65569608 | + | NM_026879    | Chmp2b     | - |
| DM128 | Cdkn2a-/-_C57   | LV.SF.LTR | LIVER       | 16 | 65588666 | - | NM_026879    | Chmp2b     | - |
| DM67  | Cdkn2a-/-_C57   | LV.SF.LTR | LIVER       | 16 | 70412254 | - | NM_028803    | Gbe1       | + |
| DM130 | Cdkn2a-/-_C57   | LV.SF.LTR | LIVER       | 16 | 74239900 | + | NM_175549    | Robo2      | - |
| DM129 | Cdkn2a-/-_C57   | LV.SF.LTR | LIVER       | 16 | 75862321 | + | NM_023380    | Samsn1     | - |
| DM128 | Cdkn2a-/-_C57   | LV.SF.LTR | LIVER       | 16 | 77018762 | + | NM_013918    | Usp25      | + |
| M203  | Cdkn2a-/-_IFNAR | LV.SF.LTR | LIVER       | 16 | 77064298 | + | NM_013918    | Usp25      | + |
| DM128 | Cdkn2a-/-_C57   | LV.SF.LTR | LIVER       | 16 | 77110691 | - | NM_013918    | Usp25      | + |
| DM53  | Cdkn2a-/-_IFNAR | LV.SF.LTR | LIVER       | 16 | 78545193 | + | NM_025967    | D16Ert472e | - |
| DM54  | Cdkn2a-/-_IFNAR | LV.SF.LTR | LIVER       | 16 | 81440670 | + | NM_010954    | Ncam2      | + |
| DM46  | Cdkn2a-/-_IFNAR | LV.SF.LTR | LIVER       | 16 | 81440950 | - | NM_010954    | Ncam2      | + |
| DM45  | Cdkn2a-/-_IFNAR | LV.SF.LTR | LIVER       | 16 | 81448034 | - | NM_010954    | Ncam2      | + |
| DM130 | Cdkn2a-/-_C57   | LV.SF.LTR | LIVER       | 16 | 81459371 | - | NM_010954    | Ncam2      | + |
| DM130 | Cdkn2a-/-_C57   | LV.SF.LTR | LIVER       | 16 | 84839846 | - | NM_008065    | Gabpa      | + |
| DM65  | Cdkn2a-/-_C57   | LV.SF.LTR | LIVER       | 16 | 85280290 | + | NM_007471    | App        | - |
| DM66  | Cdkn2a-/-_C57   | LV.SF.LTR | LIVER       | 16 | 85545498 | + | NM_144853    | Cyrr1      | - |
| M23   | Cdkn2a-/-_IFNAR | LV.SF.LTR | LIVER       | 16 | 87423085 | - | NM_001081068 | Rnf160     | - |
| DM65  | Cdkn2a-/-_C57   | LV.SF.LTR | LIVER       | 16 | 87484248 | + | NM_009840    | Cct8       | - |
| DM128 | Cdkn2a-/-_C57   | LV.SF.LTR | LIVER       | 16 | 88483175 | - | NM_181490    | Cldn17     | - |
| DM67  | Cdkn2a-/-_C57   | LV.SF.LTR | VER - SPLEE | 16 | 91668053 | - | NM_178880    | Son        | + |
| DM129 | Cdkn2a-/-_C57   | LV.SF.LTR | LIVER       | 16 | 92817995 | - | NM_001111021 | Runx1      | - |
| DM129 | Cdkn2a-/-_C57   | LV.SF.LTR | LIVER       | 16 | 94599041 | + | NM_009441    | Ttc3       | + |
| DM129 | Cdkn2a-/-_C57   | LV.SF.LTR | LIVER       | 17 | 10418426 | + | NM_001159516 | Qk         | - |
| DM67  | Cdkn2a-/-_C57   | LV.SF.LTR | LIVER       | 17 | 11543897 | + | NM_016694    | Park2      | + |
| DM46  | Cdkn2a-/-_IFNAR | LV.SF.LTR | LIVER       | 17 | 12516202 | - | NM_011948    | Map3k4     | - |

|       |                 |           |             |    |          |   |              |               |   |
|-------|-----------------|-----------|-------------|----|----------|---|--------------|---------------|---|
| DM67  | Cdkn2a-/-_C57   | LV.SF.LTR | SPLEEN      | 17 | 12932319 | - | NM_010515    | Igf2r         | - |
| DM128 | Cdkn2a-/-_C57   | LV.SF.LTR | LIVER       | 17 | 13176970 | + | NM_001113532 | Wtap          | - |
| DM126 | Cdkn2a-/-_C57   | LV.SF.LTR | LIVER       | 17 | 15095712 | + | NM_024250    | Phf10         | - |
| DM56  | Cdkn2a-/-_IFNAR | LV.SF.LTR | VER - SPLEE | 17 | 15194673 | - | NM_001034891 | 2210404J11Rik | + |
| DM67  | Cdkn2a-/-_C57   | LV.SF.LTR | LIVER       | 17 | 17588931 | - | NM_025681    | Lix1          | + |
| DM129 | Cdkn2a-/-_C57   | LV.SF.LTR | LIVER       | 17 | 17669837 | - | NM_172827    | Lnpep         | - |
| DM131 | Cdkn2a-/-_C57   | LV.SF.LTR | LIVER       | 17 | 17686436 | - | NM_172827    | Lnpep         | - |
| DM56  | Cdkn2a-/-_IFNAR | LV.SF.LTR | VER - SPLEE | 17 | 17689826 | - | NM_172827    | Lnpep         | - |
| DM52  | Cdkn2a-/-_IFNAR | LV.SF.LTR | LIVER       | 17 | 21149539 | + | NM_145483    | Zfp160        | + |
| DM68  | Cdkn2a-/-_C57   | LV.SF.LTR | SPLEEN      | 17 | 21645340 | - | NM_013843    | Zfp53         | + |
| DM130 | Cdkn2a-/-_C57   | LV.SF.LTR | LIVER       | 17 | 23002209 | - | NM_001110254 | A630033E08Rik | - |
| DM67  | Cdkn2a-/-_C57   | LV.SF.LTR | SPLEEN      | 17 | 26818608 | + | NM_025272    | Atp6v0e       | + |
| DM55  | Cdkn2a-/-_IFNAR | LV.SF.LTR | LIVER       | 17 | 33957761 | - | NM_030697    | Kank3         | + |
| DM66  | Cdkn2a-/-_C57   | LV.SF.LTR | LIVER       | 17 | 34353144 | - | NM_011530    | Tap2          | + |
| DM46  | Cdkn2a-/-_IFNAR | LV.SF.LTR | LIVER       | 17 | 37728574 | - | NM_146287    | Olf114        | - |
| DM56  | Cdkn2a-/-_IFNAR | LV.SF.LTR | VER - SPLEE | 17 | 38874139 | + | NM_146807    | Olf136        | + |
| DM34  | Cdkn2a-/-_FVB   | LV.SF.LTR | LIVER       | 17 | 40953213 | - | NM_011269    | Rhag          | + |
| DM50  | Cdkn2a-/-_IFNAR | LV.SF.LTR | LIVER       | 17 | 43206608 | - | NM_178589    | Tnfrsf21      | + |
| DM35  | Cdkn2a-/-_FVB   | LV.SF.LTR | LIVER       | 17 | 44979856 | + | NM_178652    | Supt3h        | + |
| DM40  | Cdkn2a-/-_IFNAR | LV.SF.LTR | LIVER       | 17 | 45007503 | - | NM_178652    | Supt3h        | + |
| DM56  | Cdkn2a-/-_IFNAR | LV.SF.LTR | VER - SPLEE | 17 | 45179705 | + | NM_178652    | Supt3h        | + |
| DM67  | Cdkn2a-/-_C57   | LV.SF.LTR | LIVER       | 17 | 46536927 | + | NM_207671    | Zfp318        | + |
| DM68  | Cdkn2a-/-_C57   | LV.SF.LTR | SPLEEN      | 17 | 51315851 | - | NM_028162    | Tbc1d5        | - |
| DM66  | Cdkn2a-/-_C57   | LV.SF.LTR | LIVER       | 17 | 53632946 | + | NM_025887    | Rab5a         | + |
| DM40  | Cdkn2a-/-_IFNAR | LV.SF.LTR | LIVER       | 17 | 53640922 | + | NM_025887    | Rab5a         | + |
| DM130 | Cdkn2a-/-_C57   | LV.SF.LTR | LIVER       | 17 | 55877863 | - | NM_139138    | Emr4          | + |
| DM67  | Cdkn2a-/-_C57   | LV.SF.LTR | LIVER       | 17 | 55955143 | - | NM_139138    | Emr4          | + |
| DM67  | Cdkn2a-/-_C57   | LV.SF.LTR | VER - SPLEE | 17 | 56163922 | - | NM_013664    | Sh3gl1        | - |
| DM46  | Cdkn2a-/-_IFNAR | LV.SF.LTR | LIVER       | 17 | 56195758 | + | NM_013733    | Chaf1a        | + |
| DM55  | Cdkn2a-/-_IFNAR | LV.SF.LTR | LIVER       | 17 | 63795490 | - | NM_001037997 | Fert2         | + |
| DM67  | Cdkn2a-/-_C57   | LV.SF.LTR | LIVER       | 17 | 64233307 | + | NM_001037997 | Fert2         | + |

|       |                |           |              |    |          |   |              |               |   |
|-------|----------------|-----------|--------------|----|----------|---|--------------|---------------|---|
| DM37  | Cdkn2a-/_IFNAR | LV.SF.LTR | LIVER        | 17 | 64429047 | + | NM_001037997 | Fert2         | + |
| DM128 | Cdkn2a-/_C57   | LV.SF.LTR | LIVER        | 17 | 64940456 | - | NM_008549    | Man2a1        | + |
| DM37  | Cdkn2a-/_IFNAR | LV.SF.LTR | LIVER        | 17 | 66021204 | + | NM_133685    | Rab31         | - |
| DM37  | Cdkn2a-/_IFNAR | LV.SF.LTR | LIVER        | 17 | 66021250 | - | NM_133685    | Rab31         | - |
| M203  | Cdkn2a-/_IFNAR | LV.SF.LTR | LIVER        | 17 | 66272402 | - | NM_023053    | Twsg1         | - |
| DM31  | Cdkn2a-/_FVB   | LV.SF.LTR | LIVER        | 17 | 66387798 | - | NM_001025572 | Ankrd12       | - |
| DM55  | Cdkn2a-/_IFNAR | LV.SF.LTR | SPLEEN       | 17 | 66858707 | - | NM_024448    | Rab12         | - |
| DM67  | Cdkn2a-/_C57   | LV.SF.LTR | LIVER        | 17 | 67175002 | - | NM_008984    | Ptpm          | - |
| DM130 | Cdkn2a-/_C57   | LV.SF.LTR | LIVER        | 17 | 67501994 | - | NM_008984    | Ptpm          | - |
| DM40  | Cdkn2a-/_IFNAR | LV.SF.LTR | LIVER        | 17 | 69509325 | - | NM_013813    | Epb4.113      | + |
| DM129 | Cdkn2a-/_C57   | LV.SF.LTR | LIVER        | 17 | 71061342 | - | NM_001128181 | Dlgap1        | + |
| DM30  | Cdkn2a-/_FVB   | LV.SF.LTR | LIVER        | 17 | 71446309 | - | NM_001083934 | Myom1         | + |
| DM56  | Cdkn2a-/_IFNAR | LV.SF.LTR | LIVER        | 17 | 72056510 | - | NM_177087    | Fam179a       | + |
| DM56  | Cdkn2a-/_IFNAR | LV.SF.LTR | VER - SPLEEN | 17 | 73191570 | + | NM_027166    | Ypel5         | + |
| DM56  | Cdkn2a-/_IFNAR | LV.SF.LTR | VER - SPLEEN | 17 | 73399608 | + | NM_001081071 | Lclat1        | + |
| DM52  | Cdkn2a-/_IFNAR | LV.SF.LTR | LIVER        | 17 | 78614381 | + | NM_015800    | Crim1         | + |
| DM33  | Cdkn2a-/_FVB   | LV.SF.LTR | LIVER        | 17 | 79403852 | + | NM_029239    | Prkd3         | - |
| M206  | Cdkn2a-/_IFNAR | LV.SF.LTR | LIVER        | 17 | 80445805 | - | NM_144802    | Hnrp11        | - |
| DM28  | Cdkn2a-/_FVB   | LV.SF.LTR | LIVER        | 17 | 80842738 | - | NM_009231    | Sos1          | - |
| DM40  | Cdkn2a-/_IFNAR | LV.SF.LTR | LIVER        | 17 | 80842787 | - | NM_009231    | Sos1          | - |
| DM128 | Cdkn2a-/_C57   | LV.SF.LTR | LIVER        | 17 | 81007170 | + | NM_001081357 | Map4k3        | - |
| DM128 | Cdkn2a-/_C57   | LV.SF.LTR | LIVER        | 17 | 81777453 | + | NM_001112798 | Slc8a1        | - |
| DM67  | Cdkn2a-/_C57   | LV.SF.LTR | LIVER        | 17 | 82160319 | + | NM_001112798 | Slc8a1        | - |
| DM50  | Cdkn2a-/_IFNAR | LV.SF.LTR | LIVER        | 17 | 84703301 | + | NM_001001806 | Zfp3612       | - |
| DM128 | Cdkn2a-/_C57   | LV.SF.LTR | LIVER        | 17 | 85843445 | + | NM_028576    | 1700106N22Rik | + |
| DM128 | Cdkn2a-/_C57   | LV.SF.LTR | LIVER        | 18 | 3341803  | + | NM_001110850 | Crem          | - |
| DM67  | Cdkn2a-/_C57   | LV.SF.LTR | LIVER        | 18 | 3837503  | + | NM_026505    | Bambi         | + |
| M208  | Cdkn2a-/_IFNAR | LV.SF.LTR | LIVER        | 18 | 4332330  | - | NM_007746    | Map3k8        | - |
| DM130 | Cdkn2a-/_C57   | LV.SF.LTR | LIVER        | 18 | 4332383  | - | NM_007746    | Map3k8        | - |
| DM131 | Cdkn2a-/_C57   | LV.SF.LTR | LIVER        | 18 | 5481547  | - | NM_011546    | Zeb1          | + |
| DM43  | Cdkn2a-/_IFNAR | LV.SF.LTR | LIVER        | 18 | 6501002  | - | NM_007935    | Epc1          | - |

|       |                 |           |                |    |          |   |              |           |   |
|-------|-----------------|-----------|----------------|----|----------|---|--------------|-----------|---|
| DM128 | Cdkn2a-/-_C57   | LV.SF.LTR | LIVER          | 18 | 7900428  | - | NM_001146298 | Wac       | + |
| DM49  | Cdkn2a-/-_IFNAR | LV.SF.LTR | LIVER          | 18 | 10576149 | - | NM_001081222 | Esco1     | - |
| DM40  | Cdkn2a-/-_IFNAR | LV.SF.LTR | LIVER          | 18 | 10810989 | - | NM_144860    | Mib1      | + |
| DM45  | Cdkn2a-/-_IFNAR | LV.SF.LTR | LIVER          | 18 | 11880555 | - | NM_001081223 | Rbbp8     | + |
| DM46  | Cdkn2a-/-_IFNAR | LV.SF.LTR | LIVER          | 18 | 13151295 | - | NM_008378    | Impact    | + |
| DM46  | Cdkn2a-/-_IFNAR | LV.SF.LTR | LIVER          | 18 | 14877275 | - | NM_001161369 | Ss18      | - |
| DM46  | Cdkn2a-/-_IFNAR | LV.SF.LTR | LIVER          | 18 | 17922918 | - | NM_007664    | Cdh2      | - |
| DM129 | Cdkn2a-/-_C57   | LV.SF.LTR | LIVER          | 18 | 23938583 | + | NM_153058    | Mapre2    | + |
| DM65  | Cdkn2a-/-_C57   | LV.SF.LTR | LIVER          | 18 | 24266373 | - | NM_172625    | Ino80c    | - |
| DM130 | Cdkn2a-/-_C57   | LV.SF.LTR | LIVER          | 18 | 26045128 | - | NM_001146292 | Bruno14   | - |
| DM56  | Cdkn2a-/-_IFNAR | LV.SF.LTR | LIVER - SPLEEN | 18 | 30444628 | - | NM_181414    | Pik3c3    | + |
| DM131 | Cdkn2a-/-_C57   | LV.SF.LTR | LIVER          | 18 | 31753404 | - | NM_026165    | Slc25a46  | - |
| DM45  | Cdkn2a-/-_IFNAR | LV.SF.LTR | LIVER          | 18 | 33830144 | + | NM_013512    | Epb4.114a | - |
| DM51  | Cdkn2a-/-_IFNAR | LV.SF.LTR | LIVER          | 18 | 34961015 | + | NM_001081256 | Kdm3b     | + |
| DM126 | Cdkn2a-/-_C57   | LV.SF.LTR | LIVER          | 18 | 35361873 | - | NM_009818    | Ctnna1    | + |
| DM131 | Cdkn2a-/-_C57   | LV.SF.LTR | LIVER          | 18 | 36747695 | + | NM_175375    | Ankhd1    | + |
| DM67  | Cdkn2a-/-_C57   | LV.SF.LTR | SPLEEN         | 18 | 38087778 | - | NM_007858    | Diap1     | - |
| DM37  | Cdkn2a-/-_IFNAR | LV.SF.LTR | LIVER          | 18 | 38566745 | + | NM_022996    | Ndfip1    | + |
| DM131 | Cdkn2a-/-_C57   | LV.SF.LTR | LIVER          | 18 | 42704126 | + | NM_001039474 | Tcerg1    | + |
| DM46  | Cdkn2a-/-_IFNAR | LV.SF.LTR | LIVER          | 18 | 42955894 | - | NM_027531    | Ppp2r2b   | - |
| DM129 | Cdkn2a-/-_C57   | LV.SF.LTR | LIVER          | 18 | 43672478 | + | NM_009468    | Dpysl3    | - |
| DM45  | Cdkn2a-/-_IFNAR | LV.SF.LTR | LIVER          | 18 | 44907568 | + | NM_001085373 | Mcc       | - |
| DM65  | Cdkn2a-/-_C57   | LV.SF.LTR | LIVER          | 18 | 45021820 | - | NM_001085373 | Mcc       | - |
| DM67  | Cdkn2a-/-_C57   | LV.SF.LTR | LIVER          | 18 | 45022560 | + | NM_001085373 | Mcc       | - |
| DM128 | Cdkn2a-/-_C57   | LV.SF.LTR | LIVER          | 18 | 50036053 | + | NM_001081371 | Dmx11     | + |
| DM40  | Cdkn2a-/-_IFNAR | LV.SF.LTR | LIVER          | 18 | 50210090 | - | NM_134131    | Tnfaip8   | + |
| DM34  | Cdkn2a-/-_FVB   | LV.SF.LTR | LIVER          | 18 | 52302056 | + | NM_026286    | Ftmt      | + |
| DM128 | Cdkn2a-/-_C57   | LV.SF.LTR | LIVER          | 18 | 52326650 | - | NM_026286    | Ftmt      | + |
| DM67  | Cdkn2a-/-_C57   | LV.SF.LTR | SPLEEN         | 18 | 55086316 | + | NM_175751    | Zfp608    | - |
| DM31  | Cdkn2a-/-_FVB   | LV.SF.LTR | LIVER          | 18 | 55207299 | + | NM_175751    | Zfp608    | - |
| DM51  | Cdkn2a-/-_IFNAR | LV.SF.LTR | LIVER          | 18 | 56094728 | - | NM_026240    | Gramd3    | + |

|       |                 |           |             |    |          |   |              |               |   |
|-------|-----------------|-----------|-------------|----|----------|---|--------------|---------------|---|
| DM31  | Cdkn2a-/-_FVB   | LV.SF.LTR | LIVER       | 18 | 57039184 | - | NM_177115    | 3-Mar         | - |
| DM129 | Cdkn2a-/-_C57   | LV.SF.LTR | LIVER       | 18 | 58064814 | + | NM_009194    | Slc12a2       | + |
| DM51  | Cdkn2a-/-_IFNAR | LV.SF.LTR | LIVER       | 18 | 58830671 | + | NM_025478    | Isoc1         | + |
| DM45  | Cdkn2a-/-_IFNAR | LV.SF.LTR | LIVER       | 18 | 62208229 | + | NM_172628    | Sh3tc2        | + |
| DM129 | Cdkn2a-/-_C57   | LV.SF.LTR | LIVER       | 18 | 65606309 | + | NM_172833    | Malt1         | + |
| DM40  | Cdkn2a-/-_IFNAR | LV.SF.LTR | LIVER       | 18 | 65627133 | + | NM_172833    | Malt1         | + |
| DM130 | Cdkn2a-/-_C57   | LV.SF.LTR | LIVER       | 18 | 66621635 | - | NM_021451    | Pmaip1        | + |
| DM65  | Cdkn2a-/-_C57   | LV.SF.LTR | LIVER       | 18 | 67857751 | - | NM_001127177 | Ptpn2         | - |
| DM67  | Cdkn2a-/-_C57   | LV.SF.LTR | VER - SPLEE | 18 | 68097341 | + | NM_172631    | D18Erd653e    | + |
| DM128 | Cdkn2a-/-_C57   | LV.SF.LTR | LIVER       | 18 | 70630043 | + | NM_172967    | 4930503L19Rik | - |
| DM129 | Cdkn2a-/-_C57   | LV.SF.LTR | LIVER       | 18 | 70851385 | + | NM_010773    | Mbd2          | + |
| DM50  | Cdkn2a-/-_IFNAR | LV.SF.LTR | LIVER       | 18 | 74445752 | - | NM_028948    | Ccdc11        | + |
| DM129 | Cdkn2a-/-_C57   | LV.SF.LTR | LIVER       | 18 | 75069264 | + | NM_010720    | Lipg          | - |
| DM128 | Cdkn2a-/-_C57   | LV.SF.LTR | LIVER       | 18 | 75635182 | + | NM_201354    | Gm672         | - |
| DM56  | Cdkn2a-/-_IFNAR | LV.SF.LTR | VER - SPLEE | 18 | 77180354 | + | NM_025409    | Ier3ip1       | + |
| DM55  | Cdkn2a-/-_IFNAR | LV.SF.LTR | VER - SPLEE | 18 | 77383865 | - | NM_008602    | Pias2         | + |
| DM130 | Cdkn2a-/-_C57   | LV.SF.LTR | LIVER       | 18 | 77903801 | + | NM_178670    | 8030462N17Rik | - |
| DM46  | Cdkn2a-/-_IFNAR | LV.SF.LTR | LIVER       | 18 | 80394411 | + | NM_199197    | 1110032A13Rik | - |
| DM67  | Cdkn2a-/-_C57   | LV.SF.LTR | LIVER       | 18 | 81066028 | - | NM_015805    | Atp9b         | - |
| DM65  | Cdkn2a-/-_C57   | LV.SF.LTR | LIVER       | 18 | 81098375 | - | NM_015805    | Atp9b         | - |
| DM65  | Cdkn2a-/-_C57   | LV.SF.LTR | LIVER       | 18 | 84641829 | + | NM_177450    | Cndp1         | - |
| DM130 | Cdkn2a-/-_C57   | LV.SF.LTR | LIVER       | 18 | 84956696 | - | NM_173770    | B230399E16Rik | + |
| DM129 | Cdkn2a-/-_C57   | LV.SF.LTR | LIVER       | 18 | 89324623 | + | NM_175542    | Rtn           | + |
| DM56  | Cdkn2a-/-_IFNAR | LV.SF.LTR | LIVER       | 19 | 3937847  | - | NM_001161428 | Unc93b1       | + |
| DM55  | Cdkn2a-/-_IFNAR | LV.SF.LTR | VER - SPLEE | 19 | 5507392  | - | NM_001024560 | Snx32         | - |
| DM45  | Cdkn2a-/-_IFNAR | LV.SF.LTR | LIVER       | 19 | 5618997  | + | NM_178637    | Kat5          | - |
| DM51  | Cdkn2a-/-_IFNAR | LV.SF.LTR | LIVER       | 19 | 7524379  | - | NM_001003933 | Rtn3          | - |
| DM65  | Cdkn2a-/-_C57   | LV.SF.LTR | LIVER       | 19 | 8818520  | + | NM_019829    | Stx5a         | + |
| DM31  | Cdkn2a-/-_FVB   | LV.SF.LTR | LIVER       | 19 | 14733976 | - | NM_011600    | Tle4          | - |
| DM56  | Cdkn2a-/-_IFNAR | LV.SF.LTR | VER - SPLEE | 19 | 20451279 | - | NM_010730    | Anxa1         | - |
| DM128 | Cdkn2a-/-_C57   | LV.SF.LTR | LIVER       | 19 | 21102788 | + | NM_028953    | Tmc1          | - |



|       |                 |           |        |    |          |   |              |               |   |
|-------|-----------------|-----------|--------|----|----------|---|--------------|---------------|---|
| DM129 | Cdkn2a-/-_C57   | LV.SF.LTR | LIVER  | 19 | 21968250 | - | NM_001033759 | Tmem2         | + |
| DM129 | Cdkn2a-/-_C57   | LV.SF.LTR | LIVER  | 19 | 23310896 | - | NM_153808    | Smc5          | - |
| DM52  | Cdkn2a-/-_IFNAR | LV.SF.LTR | LIVER  | 19 | 23328429 | + | NM_153808    | Smc5          | - |
| DM129 | Cdkn2a-/-_C57   | LV.SF.LTR | LIVER  | 19 | 23786167 | + | NM_177034    | Apba1         | + |
| DM129 | Cdkn2a-/-_C57   | LV.SF.LTR | LIVER  | 19 | 25050072 | - | NM_146097    | Cbwd1         | - |
| DM54  | Cdkn2a-/-_IFNAR | LV.SF.LTR | LIVER  | 19 | 29448388 | - | NM_021893    | Cd274         | + |
| DM129 | Cdkn2a-/-_C57   | LV.SF.LTR | LIVER  | 19 | 29612917 | + | NM_001081319 | C030046E11Rik | + |
| DM128 | Cdkn2a-/-_C57   | LV.SF.LTR | LIVER  | 19 | 34719534 | - | NM_008331    | Ifit1         | + |
| DM131 | Cdkn2a-/-_C57   | LV.SF.LTR | LIVER  | 19 | 35290443 | - | NM_183046    | Kif20b        | + |
| DM131 | Cdkn2a-/-_C57   | LV.SF.LTR | LIVER  | 19 | 37439714 | + | NM_010615    | Kif11         | + |
| DM54  | Cdkn2a-/-_IFNAR | LV.SF.LTR | LIVER  | 19 | 47028543 | + | NM_029810    | Nt5c2         | - |
| DM52  | Cdkn2a-/-_IFNAR | LV.SF.LTR | LIVER  | 19 | 47407821 | + | NM_008018    | Sh3pxd2a      | - |
| DM126 | Cdkn2a-/-_C57   | LV.SF.LTR | LIVER  | 19 | 60239222 | - | NR_026942    | E330013P04Rik | + |
| DM67  | Cdkn2a-/-_C57   | LV.SF.LTR | SPLEEN | 19 | 60843207 | - | NM_010123    | Eif3a         | - |
| DM131 | Cdkn2a-/-_C57   | LV.SF.LTR | LIVER  | 19 | 60871627 | + | NM_010123    | Eif3a         | - |
| M206  | Cdkn2a-/-_IFNAR | LV.SF.LTR | LIVER  | X  | 6858513  | - | NM_019461    | Usp27x        | - |
| DM37  | Cdkn2a-/-_IFNAR | LV.SF.LTR | LIVER  | X  | 13365858 | - | NM_009806    | Cask          | - |
| DM68  | Cdkn2a-/-_C57   | LV.SF.LTR | SPLEEN | X  | 17140429 | - | NM_028058    | Fundc1        | - |
| DM67  | Cdkn2a-/-_C57   | LV.SF.LTR | SPLEEN | X  | 19985857 | - | NM_133669    | Rp2h          | + |
| DM130 | Cdkn2a-/-_C57   | LV.SF.LTR | LIVER  | X  | 20390356 | - | NM_001159645 | Araf          | + |
| DM40  | Cdkn2a-/-_IFNAR | LV.SF.LTR | LIVER  | X  | 34175680 | + | NM_001081956 | Sfrs17b       | - |
| DM67  | Cdkn2a-/-_C57   | LV.SF.LTR | LIVER  | X  | 39216755 | + | NM_001033422 | Thoc2         | - |
| DM51  | Cdkn2a-/-_IFNAR | LV.SF.LTR | LIVER  | X  | 39231173 | + | NM_001033422 | Thoc2         | - |
| DM129 | Cdkn2a-/-_C57   | LV.SF.LTR | LIVER  | X  | 39712253 | + | NM_001077712 | Stag2         | + |
| DM130 | Cdkn2a-/-_C57   | LV.SF.LTR | LIVER  | X  | 45271991 | + | NM_177215    | Ocl1          | + |
| DM126 | Cdkn2a-/-_C57   | LV.SF.LTR | LIVER  | X  | 45297002 | - | NM_177215    | Ocl1          | + |
| DM128 | Cdkn2a-/-_C57   | LV.SF.LTR | LIVER  | X  | 45588732 | - | NM_028276    | Utp14a        | + |
| M23   | Cdkn2a-/-_IFNAR | LV.SF.LTR | LIVER  | X  | 46401405 | + | NM_145951    | Enox2         | - |
| DM40  | Cdkn2a-/-_IFNAR | LV.SF.LTR | LIVER  | X  | 46508998 | + | NM_145951    | Enox2         | - |
| DM65  | Cdkn2a-/-_C57   | LV.SF.LTR | LIVER  | X  | 46534533 | - | NM_145951    | Enox2         | - |
| DM128 | Cdkn2a-/-_C57   | LV.SF.LTR | LIVER  | X  | 50348406 | + | NM_013556    | Hprt1         | + |

|       |                 |           |             |   |           |   |              |               |   |
|-------|-----------------|-----------|-------------|---|-----------|---|--------------|---------------|---|
| DM131 | Cdkn2a-/-_C57   | LV.SF.LTR | LIVER       | X | 50731280  | + | NM_027409    | Mospd1        | - |
| DM43  | Cdkn2a-/-_IFNAR | LV.SF.LTR | VER - SPLEE | X | 51048332  | - | NM_029142    | 4930502E18Rik | + |
| DM56  | Cdkn2a-/-_IFNAR | LV.SF.LTR | VER - SPLEE | X | 57532558  | - | NM_001001798 | Atp11c        | - |
| DM34  | Cdkn2a-/-_FVB   | LV.SF.LTR | LIVER       | X | 57542629  | - | NM_001001798 | Atp11c        | - |
| DM128 | Cdkn2a-/-_C57   | LV.SF.LTR | LIVER       | X | 65940353  | + | NM_008031    | Fmr1          | + |
| M24   | Cdkn2a-/-_IFNAR | LV.SF.LTR | LIVER       | X | 65979988  | - | NM_008031    | Fmr1          | + |
| DM130 | Cdkn2a-/-_C57   | LV.SF.LTR | LIVER       | X | 66653356  | + | NM_008032    | Aff2          | + |
| M206  | Cdkn2a-/-_IFNAR | LV.SF.LTR | LIVER       | X | 71315634  | + | NM_010788    | Mecp2         | - |
| DM54  | Cdkn2a-/-_IFNAR | LV.SF.LTR | LIVER       | X | 82842958  | + | NM_025729    | Map3k7ip3     | + |
| DM67  | Cdkn2a-/-_C57   | LV.SF.LTR | LIVER       | X | 83031388  | + | NM_008194    | Gyk           | - |
| DM131 | Cdkn2a-/-_C57   | LV.SF.LTR | LIVER       | X | 84229422  | + | NM_001160403 | Il1rap1l      | - |
| DM55  | Cdkn2a-/-_IFNAR | LV.SF.LTR | SPLEEN      | X | 87294204  | - | NR_003621    | 4930415L06Rik | - |
| DM131 | Cdkn2a-/-_C57   | LV.SF.LTR | LIVER       | X | 99746334  | + | NM_008832    | Phka1         | - |
| DM126 | Cdkn2a-/-_C57   | LV.SF.LTR | LIVER       | X | 101168414 | + | NM_011276    | Rlim          | - |
| DM56  | Cdkn2a-/-_IFNAR | LV.SF.LTR | VER - SPLEE | X | 103227178 | - | NM_001109757 | Atp7a         | + |
| DM130 | Cdkn2a-/-_C57   | LV.SF.LTR | LIVER       | X | 109430749 | - | NM_026565    | Apool         | + |
| DM65  | Cdkn2a-/-_C57   | LV.SF.LTR | LIVER       | X | 110270233 | - | NM_018818    | Chm           | - |
| DM129 | Cdkn2a-/-_C57   | LV.SF.LTR | LIVER       | X | 110929464 | + | NM_001142570 | Dach2         | + |
| DM46  | Cdkn2a-/-_IFNAR | LV.SF.LTR | LIVER       | X | 110962914 | + | NM_033605    | Dach2         | + |
| DM126 | Cdkn2a-/-_C57   | LV.SF.LTR | LIVER       | X | 126297425 | - | NM_017398    | Diap2         | + |
| DM67  | Cdkn2a-/-_C57   | LV.SF.LTR | LIVER       | X | 126399167 | - | NM_017398    | Diap2         | + |
| DM56  | Cdkn2a-/-_IFNAR | LV.SF.LTR | VER - SPLEE | X | 126487486 | - | NM_017398    | Diap2         | + |
| DM129 | Cdkn2a-/-_C57   | LV.SF.LTR | LIVER       | X | 126671719 | - | NM_017398    | Diap2         | + |
| DM40  | Cdkn2a-/-_IFNAR | LV.SF.LTR | LIVER       | X | 131126211 | - | NM_013463    | Gla           | - |
| DM56  | Cdkn2a-/-_IFNAR | LV.SF.LTR | LIVER       | X | 133528770 | - | NM_001035509 | Zcchc18       | + |
| DM126 | Cdkn2a-/-_C57   | LV.SF.LTR | LIVER       | X | 136280767 | - | NM_001081499 | Tbc1d8b       | + |
| DM130 | Cdkn2a-/-_C57   | LV.SF.LTR | LIVER       | X | 150104784 | + | NM_175429    | Kctd12b       | - |
| DM66  | Cdkn2a-/-_C57   | LV.SF.LTR | LIVER       | X | 151716167 | + | NM_019736    | Acot9         | + |
| DM129 | Cdkn2a-/-_C57   | LV.SF.LTR | LIVER       | X | 152041970 | - | NM_001093750 | Ptchd1        | - |
| DM67  | Cdkn2a-/-_C57   | LV.SF.LTR | LIVER       | X | 153880336 | + | NM_009214    | Sms           | - |
| DM130 | Cdkn2a-/-_C57   | LV.SF.LTR | LIVER       | X | 156501702 | + | NM_008810    | Pdha1         | - |

|       |                              |               |        |   |           |   |              |               |   |
|-------|------------------------------|---------------|--------|---|-----------|---|--------------|---------------|---|
| DM50  | Cdkn2a <sup>-/-</sup> _IFNAR | LV.SF.LTR     | LIVER  | X | 157292106 | + | NM_001024624 | Cdk15         | - |
| DM67  | Cdkn2a <sup>-/-</sup> _C57   | LV.SF.LTR     | SPLEEN | X | 160354942 | + | NM_026887    | Ap1s2         | + |
| DM65  | Cdkn2a <sup>-/-</sup> _C57   | LV.SF.LTR     | LIVER  | X | 160356100 | + | NM_026887    | Ap1s2         | + |
| DM40  | Cdkn2a <sup>-/-</sup> _IFNAR | LV.SF.LTR     | LIVER  | X | 163787616 | + | NM_026662    | Prps2         | - |
| DM56  | Cdkn2a <sup>-/-</sup> _IFNAR | LV.SF.LTR     | SPLEEN | X | 166254272 | + | NM_010797    | Mid1          | + |
| DM119 | Cdkn2a <sup>-/-</sup> _IFNAR | LV.SF.LTR     | LIVER  | X | 166373410 | - | NM_010797    | Mid1          | + |
| DM67  | Cdkn2a <sup>-/-</sup> _C57   | LV.SF.LTR     | SPLEEN | Y | 568513    | + | NM_009484    | Uty           | - |
| DMM1  | Cdkn2a <sup>+/-</sup> _C57   | SIN.LV.SF.GFP | LIVER  | 1 | 4800568   | + | NM_008866    | Lypla1        | + |
| DMM5  | Cdkn2a <sup>+/-</sup> _C57   | SIN.LV.SF.GFP | LIVER  | 1 | 4818661   | - | NM_008866    | Lypla1        | + |
| DMM14 | Cdkn2a <sup>+/-</sup> _C57   | SIN.LV.SF.GFP | LIVER  | 1 | 4876439   | - | NM_001159750 | Tcea1         | + |
| DMM12 | Cdkn2a <sup>+/-</sup> _C57   | SIN.LV.SF.GFP | LIVER  | 1 | 4880236   | - | NM_001159750 | Tcea1         | + |
| DMM1  | Cdkn2a <sup>+/-</sup> _C57   | SIN.LV.SF.GFP | LIVER  | 1 | 6446766   | - | NM_009826    | Rblcc1        | + |
| DMM3  | Cdkn2a <sup>+/-</sup> _C57   | SIN.LV.SF.GFP | LIVER  | 1 | 6963132   | + | NM_173868    | St18          | + |
| DMM1  | Cdkn2a <sup>+/-</sup> _C57   | SIN.LV.SF.GFP | LIVER  | 1 | 6965099   | - | NM_183028    | Pcmd1         | + |
| DMM1  | Cdkn2a <sup>+/-</sup> _C57   | SIN.LV.SF.GFP | LIVER  | 1 | 9914002   | - | NM_177722    | 6030422M02Rik | + |
| DMM3  | Cdkn2a <sup>+/-</sup> _C57   | SIN.LV.SF.GFP | LIVER  | 1 | 10212346  | - | NM_001102430 | Arfgef1       | - |
| DMM5  | Cdkn2a <sup>+/-</sup> _C57   | SIN.LV.SF.GFP | LIVER  | 1 | 13559847  | - | NM_028173    | Tram1         | - |
| DMM14 | Cdkn2a <sup>+/-</sup> _C57   | SIN.LV.SF.GFP | LIVER  | 1 | 15798235  | - | NM_009352    | Terf1         | + |
| DMM1  | Cdkn2a <sup>+/-</sup> _C57   | SIN.LV.SF.GFP | LIVER  | 1 | 16629789  | + | NM_026456    | Tceb1         | - |
| DMM1  | Cdkn2a <sup>+/-</sup> _C57   | SIN.LV.SF.GFP | LIVER  | 1 | 17592812  | - | NM_053191    | Pi15          | + |
| DMM1  | Cdkn2a <sup>+/-</sup> _C57   | SIN.LV.SF.GFP | LIVER  | 1 | 20806250  | + | NM_008563    | Mcm3          | - |
| DMM5  | Cdkn2a <sup>+/-</sup> _C57   | SIN.LV.SF.GFP | LIVER  | 1 | 21847892  | - | NM_001160139 | Kenq5         | - |
| DMM5  | Cdkn2a <sup>+/-</sup> _C57   | SIN.LV.SF.GFP | LIVER  | 1 | 23191997  | - | NM_025746    | 4933415F23Rik | - |
| DMM3  | Cdkn2a <sup>+/-</sup> _C57   | SIN.LV.SF.GFP | LIVER  | 1 | 23268847  | - | NM_001081079 | Ogfr1         | - |
| DMM14 | Cdkn2a <sup>+/-</sup> _C57   | SIN.LV.SF.GFP | LIVER  | 1 | 23269080  | - | NM_001081079 | Ogfr1         | - |
| DMM3  | Cdkn2a <sup>+/-</sup> _C57   | SIN.LV.SF.GFP | LIVER  | 1 | 23456726  | - | NM_001081079 | Ogfr1         | - |
| DMM1  | Cdkn2a <sup>+/-</sup> _C57   | SIN.LV.SF.GFP | LIVER  | 1 | 23471922  | + | NM_001081079 | Ogfr1         | - |
| DMM11 | Cdkn2a <sup>+/-</sup> _C57   | SIN.LV.SF.GFP | SPLEEN | 1 | 24575516  | + | NM_007733    | Col19a1       | - |
| DMM1  | Cdkn2a <sup>+/-</sup> _C57   | SIN.LV.SF.GFP | LIVER  | 1 | 26930876  | + | NM_001033764 | 4931408C20Rik | - |
| DMM1  | Cdkn2a <sup>+/-</sup> _C57   | SIN.LV.SF.GFP | SPLEEN | 1 | 30888054  | + | NM_001081080 | Phf3          | - |
| DMM14 | Cdkn2a <sup>+/-</sup> _C57   | SIN.LV.SF.GFP | LIVER  | 1 | 33713116  | + | NM_008922    | Prim2         | - |

|       |                            |               |                |   |          |   |              |               |   |
|-------|----------------------------|---------------|----------------|---|----------|---|--------------|---------------|---|
| DMM1  | Cdkn2a <sup>-/-</sup> _C57 | SIN.LV.SF.GFP | LIVER          | 1 | 34783336 | + | NM_183019    | Arhgef4       | + |
| DMM7  | Cdkn2a <sup>-/-</sup> _C57 | SIN.LV.SF.GFP | LIVER - SPLEEN | 1 | 40404026 | - | NM_133193    | Il1rl2        | + |
| DMM14 | Cdkn2a <sup>-/-</sup> _C57 | SIN.LV.SF.GFP | SPLEEN         | 1 | 43526649 | - | NM_010879    | Nck2          | + |
| DMM3  | Cdkn2a <sup>-/-</sup> _C57 | SIN.LV.SF.GFP | LIVER          | 1 | 43996508 | - | NM_009418    | Tpp2          | + |
| DMM2  | Cdkn2a <sup>-/-</sup> _C57 | SIN.LV.SF.GFP | LIVER          | 1 | 44218890 | + | NM_011729    | Ercc5         | + |
| DMM1  | Cdkn2a <sup>-/-</sup> _C57 | SIN.LV.SF.GFP | LIVER          | 1 | 44696452 | + | NM_028450    | Gulp1         | + |
| DMM1  | Cdkn2a <sup>-/-</sup> _C57 | SIN.LV.SF.GFP | LIVER          | 1 | 45903759 | - | NM_028599    | Wdr75         | + |
| DMM5  | Cdkn2a <sup>-/-</sup> _C57 | SIN.LV.SF.GFP | LIVER          | 1 | 46881946 | + | NM_172653    | Slc39a10      | - |
| DMM5  | Cdkn2a <sup>-/-</sup> _C57 | SIN.LV.SF.GFP | LIVER          | 1 | 46968097 | - | NM_172653    | Slc39a10      | - |
| DMM14 | Cdkn2a <sup>-/-</sup> _C57 | SIN.LV.SF.GFP | LIVER          | 1 | 51553621 | - | NM_028696    | Obfc2a        | - |
| DMM1  | Cdkn2a <sup>-/-</sup> _C57 | SIN.LV.SF.GFP | LIVER          | 1 | 52111824 | - | NM_011487    | Stat4         | + |
| DMM3  | Cdkn2a <sup>-/-</sup> _C57 | SIN.LV.SF.GFP | LIVER          | 1 | 52834213 | + | NM_008384    | Inpp1         | - |
| DMM1  | Cdkn2a <sup>-/-</sup> _C57 | SIN.LV.SF.GFP | LIVER          | 1 | 52953720 | - | NM_146108    | Hibch         | + |
| DMM14 | Cdkn2a <sup>-/-</sup> _C57 | SIN.LV.SF.GFP | LIVER          | 1 | 53357660 | + | NM_145517    | Ormdl1        | + |
| DMM8  | Cdkn2a <sup>-/-</sup> _C57 | SIN.LV.SF.GFP | LIVER          | 1 | 54450981 | - | NM_001033194 | Gtf3c3        | - |
| DMM6  | Cdkn2a <sup>-/-</sup> _C57 | SIN.LV.SF.GFP | SPLEEN         | 1 | 54481331 | - | NM_001033194 | Gtf3c3        | - |
| DMM1  | Cdkn2a <sup>-/-</sup> _C57 | SIN.LV.SF.GFP | LIVER          | 1 | 56202266 | + | NM_001114663 | Plcl1         | + |
| DMM5  | Cdkn2a <sup>-/-</sup> _C57 | SIN.LV.SF.GFP | LIVER          | 1 | 58460087 | + | NM_025824    | Bzw1          | + |
| DMM1  | Cdkn2a <sup>-/-</sup> _C57 | SIN.LV.SF.GFP | LIVER          | 1 | 60200274 | - | NM_139150    | Carf          | + |
| DMM1  | Cdkn2a <sup>-/-</sup> _C57 | SIN.LV.SF.GFP | LIVER          | 1 | 62264630 | + | NM_001081050 | Pard3b        | + |
| DMM5  | Cdkn2a <sup>-/-</sup> _C57 | SIN.LV.SF.GFP | LIVER          | 1 | 64401230 | - | NM_001037726 | Creb1         | + |
| DMM5  | Cdkn2a <sup>-/-</sup> _C57 | SIN.LV.SF.GFP | LIVER          | 1 | 64634875 | + | NM_001037726 | Creb1         | + |
| DMM3  | Cdkn2a <sup>-/-</sup> _C57 | SIN.LV.SF.GFP | LIVER          | 1 | 65578681 | - | NM_139270    | Pth2r         | + |
| DMM6  | Cdkn2a <sup>-/-</sup> _C57 | SIN.LV.SF.GFP | SPLEEN         | 1 | 65792885 | - | NM_027010    | Crygf         | + |
| DMM1  | Cdkn2a <sup>-/-</sup> _C57 | SIN.LV.SF.GFP | LIVER          | 1 | 66768449 | - | NM_001122738 | 1110028C15Rik | - |
| DMM14 | Cdkn2a <sup>-/-</sup> _C57 | SIN.LV.SF.GFP | SPLEEN         | 1 | 69642146 | + | NM_011770    | Ikzf2         | - |
| DMM5  | Cdkn2a <sup>-/-</sup> _C57 | SIN.LV.SF.GFP | LIVER          | 1 | 72297452 | - | NM_023523    | Pecr          | - |
| DMM9  | Cdkn2a <sup>-/-</sup> _C57 | SIN.LV.SF.GFP | SPLEEN         | 1 | 73705369 | + | NR_003202    | Pinc          | - |
| DMM1  | Cdkn2a <sup>-/-</sup> _C57 | SIN.LV.SF.GFP | LIVER          | 1 | 78668610 | + | NM_001033606 | Acsf3         | + |
| DMM9  | Cdkn2a <sup>-/-</sup> _C57 | SIN.LV.SF.GFP | LIVER          | 1 | 80739218 | - | NM_175291    | Dock10        | - |
| DMM5  | Cdkn2a <sup>-/-</sup> _C57 | SIN.LV.SF.GFP | LIVER          | 1 | 82258949 | - | NM_010570    | Irs1          | - |

|       |                            |               |              |   |           |   |              |               |   |
|-------|----------------------------|---------------|--------------|---|-----------|---|--------------|---------------|---|
| DMM3  | Cdkn2a <sup>-/-</sup> _C57 | SIN.LV.SF.GFP | LIVER        | 1 | 82373864  | + | NM_001122685 | Rhbdd1        | + |
| DMM3  | Cdkn2a <sup>-/-</sup> _C57 | SIN.LV.SF.GFP | LIVER        | 1 | 82851021  | - | NM_010472    | Agfg1         | + |
| DMM8  | Cdkn2a <sup>-/-</sup> _C57 | SIN.LV.SF.GFP | VER - SPLEEN | 1 | 84335179  | + | NM_152915    | Dner          | - |
| DMM3  | Cdkn2a <sup>-/-</sup> _C57 | SIN.LV.SF.GFP | LIVER        | 1 | 84770583  | - | NM_133975    | Trip12        | - |
| DMM5  | Cdkn2a <sup>-/-</sup> _C57 | SIN.LV.SF.GFP | LIVER        | 1 | 88794867  | - | NM_153530    | Dis3l2        | + |
| DMM12 | Cdkn2a <sup>-/-</sup> _C57 | SIN.LV.SF.GFP | SPLEEN       | 1 | 89881604  | - | NM_001033291 | Usp40         | - |
| DMM7  | Cdkn2a <sup>-/-</sup> _C57 | SIN.LV.SF.GFP | LIVER        | 1 | 90155728  | + | NM_198652    | 6430706D22Rik | - |
| DMM5  | Cdkn2a <sup>-/-</sup> _C57 | SIN.LV.SF.GFP | LIVER        | 1 | 90166443  | - | NM_172505    | A730008H23Rik | - |
| DMM5  | Cdkn2a <sup>-/-</sup> _C57 | SIN.LV.SF.GFP | LIVER        | 1 | 97505971  | - | NM_009183    | St8sia4       | - |
| DMM1  | Cdkn2a <sup>-/-</sup> _C57 | SIN.LV.SF.GFP | LIVER        | 1 | 97658155  | - | NM_001159745 | St8sia4       | - |
| DMM3  | Cdkn2a <sup>-/-</sup> _C57 | SIN.LV.SF.GFP | LIVER        | 1 | 99613132  | - | NM_173760    | Hispd1        | - |
| DMM4  | Cdkn2a <sup>-/-</sup> _C57 | SIN.LV.SF.GFP | LIVER        | 1 | 99623075  | - | NM_173760    | Hispd1        | - |
| DMM9  | Cdkn2a <sup>-/-</sup> _C57 | SIN.LV.SF.GFP | LIVER        | 1 | 99947681  | - | NM_013626    | Pam           | - |
| DMM2  | Cdkn2a <sup>-/-</sup> _C57 | SIN.LV.SF.GFP | SPLEEN       | 1 | 102153484 | + | NM_172851    | Cntnap5b      | + |
| DMM1  | Cdkn2a <sup>-/-</sup> _C57 | SIN.LV.SF.GFP | LIVER        | 1 | 107554315 | - | NM_013784    | Pign          | - |
| DMM5  | Cdkn2a <sup>-/-</sup> _C57 | SIN.LV.SF.GFP | LIVER        | 1 | 107714772 | + | NM_009399    | Tnfrsf11a     | + |
| DMM5  | Cdkn2a <sup>-/-</sup> _C57 | SIN.LV.SF.GFP | LIVER        | 1 | 109306993 | - | NM_027548    | Serpib7       | + |
| DMM12 | Cdkn2a <sup>-/-</sup> _C57 | SIN.LV.SF.GFP | SPLEEN       | 1 | 109417002 | - | NM_011111    | Serpib2       | + |
| DMM5  | Cdkn2a <sup>-/-</sup> _C57 | SIN.LV.SF.GFP | LIVER        | 1 | 111257581 | + | NM_172853    | Cdh7          | + |
| DMM3  | Cdkn2a <sup>-/-</sup> _C57 | SIN.LV.SF.GFP | LIVER        | 1 | 113054755 | + | NM_001081386 | Cdh19         | - |
| DMM5  | Cdkn2a <sup>-/-</sup> _C57 | SIN.LV.SF.GFP | LIVER        | 1 | 120463742 | - | NM_001081276 | Clasp1        | + |
| DMM1  | Cdkn2a <sup>-/-</sup> _C57 | SIN.LV.SF.GFP | LIVER        | 1 | 122157359 | - | NM_133186    | Steap3        | - |
| DMM5  | Cdkn2a <sup>-/-</sup> _C57 | SIN.LV.SF.GFP | LIVER        | 1 | 123460474 | + | NM_025860    | Ddx18         | - |
| DMM1  | Cdkn2a <sup>-/-</sup> _C57 | SIN.LV.SF.GFP | LIVER        | 1 | 127308277 | - | NM_023735    | Actr3         | - |
| DMM14 | Cdkn2a <sup>-/-</sup> _C57 | SIN.LV.SF.GFP | LIVER        | 1 | 129244383 | - | NM_145128    | Mgat5         | + |
| DMM1  | Cdkn2a <sup>-/-</sup> _C57 | SIN.LV.SF.GFP | SPLEEN       | 1 | 129780519 | + | NM_178690    | Rab3gap1      | + |
| DMM1  | Cdkn2a <sup>-/-</sup> _C57 | SIN.LV.SF.GFP | LIVER        | 1 | 130123642 | + | NM_181750    | R3hdm1        | + |
| DMM5  | Cdkn2a <sup>-/-</sup> _C57 | SIN.LV.SF.GFP | LIVER        | 1 | 137305399 | - | NM_153774    | Ipo9          | - |
| DMM18 | Cdkn2a <sup>-/-</sup> _C57 | SIN.LV.SF.GFP | SPLEEN       | 1 | 138525727 | + | NM_001160251 | Zfp281        | + |
| DMM3  | Cdkn2a <sup>-/-</sup> _C57 | SIN.LV.SF.GFP | LIVER        | 1 | 139752071 | + | NM_001111316 | Ptprc         | - |
| DMM1  | Cdkn2a <sup>-/-</sup> _C57 | SIN.LV.SF.GFP | SPLEEN       | 1 | 140116683 | - | NM_001111316 | Ptprc         | - |

|       |                            |               |             |   |           |   |              |         |   |
|-------|----------------------------|---------------|-------------|---|-----------|---|--------------|---------|---|
| DMM1  | Cdkn2a <sup>-/-</sup> _C57 | SIN.LV.SF.GFP | LIVER       | 1 | 140492452 | - | NM_021605    | Nek7    | - |
| DMM8  | Cdkn2a <sup>-/-</sup> _C57 | SIN.LV.SF.GFP | VER - SPLEE | 1 | 140938396 | - | NM_181347    | Dennd1b | + |
| DMM3  | Cdkn2a <sup>-/-</sup> _C57 | SIN.LV.SF.GFP | LIVER       | 1 | 140956707 | + | NM_181347    | Dennd1b | + |
| DMM8  | Cdkn2a <sup>-/-</sup> _C57 | SIN.LV.SF.GFP | LIVER       | 1 | 141324705 | - | NM_172643    | Zbtb41  | + |
| DMM2  | Cdkn2a <sup>-/-</sup> _C57 | SIN.LV.SF.GFP | LIVER       | 1 | 141363775 | - | NM_009791    | Aspm    | + |
| DMM12 | Cdkn2a <sup>-/-</sup> _C57 | SIN.LV.SF.GFP | VER - SPLEE | 1 | 141366809 | + | NM_009791    | Aspm    | + |
| DMM1  | Cdkn2a <sup>-/-</sup> _C57 | SIN.LV.SF.GFP | LIVER       | 1 | 141983833 | - | NM_009888    | Cfh     | - |
| DMM5  | Cdkn2a <sup>-/-</sup> _C57 | SIN.LV.SF.GFP | LIVER       | 1 | 142202918 | + | NM_001081027 | Kcnt2   | + |
| DMM1  | Cdkn2a <sup>-/-</sup> _C57 | SIN.LV.SF.GFP | LIVER       | 1 | 145702904 | + | NM_001159866 | Uchl5   | + |
| DMM11 | Cdkn2a <sup>-/-</sup> _C57 | SIN.LV.SF.GFP | SPLEEN      | 1 | 146152761 | - | NM_015811    | Rgs1    | - |
| DMM1  | Cdkn2a <sup>-/-</sup> _C57 | SIN.LV.SF.GFP | SPLEEN      | 1 | 146609266 | + | NM_022881    | Rgs18   | - |
| DMM14 | Cdkn2a <sup>-/-</sup> _C57 | SIN.LV.SF.GFP | LIVER       | 1 | 148804365 | + | NM_001145807 | Fam5c   | + |
| DMM5  | Cdkn2a <sup>-/-</sup> _C57 | SIN.LV.SF.GFP | LIVER       | 1 | 150657583 | - | NM_008869    | Pla2g4a | - |
| DMM14 | Cdkn2a <sup>-/-</sup> _C57 | SIN.LV.SF.GFP | LIVER       | 1 | 150778898 | + | NM_008869    | Pla2g4a | - |
| DMM14 | Cdkn2a <sup>-/-</sup> _C57 | SIN.LV.SF.GFP | LIVER       | 1 | 150964240 | + | NM_008869    | Pla2g4a | - |
| DMM3  | Cdkn2a <sup>-/-</sup> _C57 | SIN.LV.SF.GFP | LIVER       | 1 | 151725603 | + | NM_008869    | Pla2g4a | - |
| DMM5  | Cdkn2a <sup>-/-</sup> _C57 | SIN.LV.SF.GFP | VER - SPLEE | 1 | 151856126 | - | NM_008869    | Pla2g4a | - |
| DMM14 | Cdkn2a <sup>-/-</sup> _C57 | SIN.LV.SF.GFP | LIVER       | 1 | 157123136 | - | NM_011273    | Xpr1    | - |
| DMM3  | Cdkn2a <sup>-/-</sup> _C57 | SIN.LV.SF.GFP | LIVER       | 1 | 158786211 | - | NM_028333    | Angpt1  | + |
| DMM1  | Cdkn2a <sup>-/-</sup> _C57 | SIN.LV.SF.GFP | LIVER       | 1 | 161194617 | - | NM_011931    | Rfwd2   | + |
| DMM5  | Cdkn2a <sup>-/-</sup> _C57 | SIN.LV.SF.GFP | LIVER       | 1 | 161270319 | + | NM_011931    | Rfwd2   | + |
| DMM7  | Cdkn2a <sup>-/-</sup> _C57 | SIN.LV.SF.GFP | SPLEEN      | 1 | 161977212 | + | NM_177839    | Tnn     | - |
| DMM3  | Cdkn2a <sup>-/-</sup> _C57 | SIN.LV.SF.GFP | LIVER       | 1 | 164650429 | + | NM_001081290 | Bat2d   | - |
| DMM5  | Cdkn2a <sup>-/-</sup> _C57 | SIN.LV.SF.GFP | LIVER       | 1 | 165325227 | - | NM_178883    | Gorab   | - |
| DMM1  | Cdkn2a <sup>-/-</sup> _C57 | SIN.LV.SF.GFP | LIVER       | 1 | 167271247 | + | NM_001081126 | Gpr161  | + |
| DMM2  | Cdkn2a <sup>-/-</sup> _C57 | SIN.LV.SF.GFP | LIVER       | 1 | 167349766 | - | NM_027430    | Brp44   | + |
| DMM14 | Cdkn2a <sup>-/-</sup> _C57 | SIN.LV.SF.GFP | LIVER       | 1 | 167403537 | - | NM_027430    | Brp44   | + |
| DMM1  | Cdkn2a <sup>-/-</sup> _C57 | SIN.LV.SF.GFP | LIVER       | 1 | 167928986 | + | NM_011137    | Pou2f1  | - |
| DMM1  | Cdkn2a <sup>-/-</sup> _C57 | SIN.LV.SF.GFP | SPLEEN      | 1 | 170803860 | - | NM_008783    | Pbx1    | - |
| DMM18 | Cdkn2a <sup>-/-</sup> _C57 | SIN.LV.SF.GFP | LIVER       | 1 | 171446239 | - | NM_023284    | Nuf2    | - |
| DMM5  | Cdkn2a <sup>-/-</sup> _C57 | SIN.LV.SF.GFP | LIVER       | 1 | 171451817 | + | NM_023284    | Nuf2    | - |

|       |                            |               |        |   |           |   |              |               |   |
|-------|----------------------------|---------------|--------|---|-----------|---|--------------|---------------|---|
| DMM1  | Cdkn2a <sup>-/-</sup> _C57 | SIN.LV.SF.GFP | LIVER  | 1 | 177533058 | + | NM_010209    | Fhl1          | - |
| DMM18 | Cdkn2a <sup>-/-</sup> _C57 | SIN.LV.SF.GFP | SPLEEN | 1 | 177571752 | + | NM_133809    | Kmo           | + |
| DMM1  | Cdkn2a <sup>-/-</sup> _C57 | SIN.LV.SF.GFP | LIVER  | 1 | 178679123 | + | NM_001099637 | Cep170        | - |
| DMM18 | Cdkn2a <sup>-/-</sup> _C57 | SIN.LV.SF.GFP | LIVER  | 1 | 178723929 | - | NM_001099637 | Cep170        | - |
| DMM1  | Cdkn2a <sup>-/-</sup> _C57 | SIN.LV.SF.GFP | SPLEEN | 1 | 179035506 | - | NM_011785    | Akt3          | - |
| DMM1  | Cdkn2a <sup>-/-</sup> _C57 | SIN.LV.SF.GFP | LIVER  | 1 | 179048667 | - | NM_011785    | Akt3          | - |
| DMM5  | Cdkn2a <sup>-/-</sup> _C57 | SIN.LV.SF.GFP | LIVER  | 1 | 181339055 | - | NM_027188    | Smyd3         | - |
| DMM1  | Cdkn2a <sup>-/-</sup> _C57 | SIN.LV.SF.GFP | LIVER  | 1 | 182599286 | - | NM_175186    | Lin9          | + |
| DMM9  | Cdkn2a <sup>-/-</sup> _C57 | SIN.LV.SF.GFP | SPLEEN | 1 | 182661769 | + | NM_133225    | Acdb3         | + |
| DMM1  | Cdkn2a <sup>-/-</sup> _C57 | SIN.LV.SF.GFP | LIVER  | 1 | 182920623 | - | NM_010145    | Ephx1         | - |
| DMM13 | Cdkn2a <sup>-/-</sup> _C57 | SIN.LV.SF.GFP | SPLEEN | 1 | 187040221 | - | NM_198653    | Iars2         | - |
| DMM1  | Cdkn2a <sup>-/-</sup> _C57 | SIN.LV.SF.GFP | LIVER  | 1 | 187209223 | - | NM_029735    | Eprs          | + |
| DMM5  | Cdkn2a <sup>-/-</sup> _C57 | SIN.LV.SF.GFP | LIVER  | 1 | 189414039 | - | NM_026367    | Gpatch2       | + |
| DMM1  | Cdkn2a <sup>-/-</sup> _C57 | SIN.LV.SF.GFP | LIVER  | 1 | 190799407 | - | NM_172650    | Kctd3         | - |
| DMM1  | Cdkn2a <sup>-/-</sup> _C57 | SIN.LV.SF.GFP | LIVER  | 1 | 193170880 | - | NM_025864    | Tmem206       | + |
| DMM1  | Cdkn2a <sup>-/-</sup> _C57 | SIN.LV.SF.GFP | LIVER  | 1 | 193409084 | + | NM_178632    | Ints7         | + |
| DMM6  | Cdkn2a <sup>-/-</sup> _C57 | SIN.LV.SF.GFP | SPLEEN | 1 | 193415658 | + | NM_178632    | Ints7         | + |
| DMM9  | Cdkn2a <sup>-/-</sup> _C57 | SIN.LV.SF.GFP | SPLEEN | 1 | 195014205 | + | NM_153137    | Traf3ip3      | - |
| DMM1  | Cdkn2a <sup>-/-</sup> _C57 | SIN.LV.SF.GFP | LIVER  | 1 | 196839294 | - | NM_010778    | Cd46          | - |
| DMM1  | Cdkn2a <sup>-/-</sup> _C57 | SIN.LV.SF.GFP | LIVER  | 1 | 196967308 | + | NM_007758    | Cr2           | - |
| DMM3  | Cdkn2a <sup>-/-</sup> _C57 | SIN.LV.SF.GFP | LIVER  | 2 | 6583573   | - | NM_001110228 | Cugbp2        | - |
| DMM14 | Cdkn2a <sup>-/-</sup> _C57 | SIN.LV.SF.GFP | LIVER  | 2 | 6652814   | + | NM_001110228 | Cugbp2        | - |
| DMM3  | Cdkn2a <sup>-/-</sup> _C57 | SIN.LV.SF.GFP | LIVER  | 2 | 7604402   | + | NM_001110231 | Cugbp2        | - |
| DMM5  | Cdkn2a <sup>-/-</sup> _C57 | SIN.LV.SF.GFP | LIVER  | 2 | 8998884   | + | NM_008091    | Gata3         | - |
| DMM1  | Cdkn2a <sup>-/-</sup> _C57 | SIN.LV.SF.GFP | LIVER  | 2 | 9856906   | - | NM_027748    | Taf3          | - |
| DMM7  | Cdkn2a <sup>-/-</sup> _C57 | SIN.LV.SF.GFP | LIVER  | 2 | 11517524  | - | NM_152824    | Rbm17         | - |
| DMM5  | Cdkn2a <sup>-/-</sup> _C57 | SIN.LV.SF.GFP | LIVER  | 2 | 12283779  | + | NM_024185    | 2310047O13Rik | - |
| DMM1  | Cdkn2a <sup>-/-</sup> _C57 | SIN.LV.SF.GFP | LIVER  | 2 | 13457236  | - | NM_010067    | Trdmt1        | - |
| DMM1  | Cdkn2a <sup>-/-</sup> _C57 | SIN.LV.SF.GFP | LIVER  | 2 | 13812923  | + | NM_145838    | St8sia6       | - |
| DMM1  | Cdkn2a <sup>-/-</sup> _C57 | SIN.LV.SF.GFP | LIVER  | 2 | 14058521  | - | NM_011484    | Stam          | + |
| DMM14 | Cdkn2a <sup>-/-</sup> _C57 | SIN.LV.SF.GFP | LIVER  | 2 | 14372085  | - | NM_001012305 | Slc39a12      | + |

|       |                            |               |              |   |          |   |              |          |   |
|-------|----------------------------|---------------|--------------|---|----------|---|--------------|----------|---|
| DMM14 | Cdkn2a <sup>-/-</sup> _C57 | SIN.LV.SF.GFP | LIVER        | 2 | 15075744 | - | NM_029466    | Arl5b    | + |
| DMM3  | Cdkn2a <sup>-/-</sup> _C57 | SIN.LV.SF.GFP | LIVER        | 2 | 17485548 | - | NM_028757    | Nabl     | - |
| DMM1  | Cdkn2a <sup>-/-</sup> _C57 | SIN.LV.SF.GFP | LIVER        | 2 | 18257688 | - | NM_007869    | Dnajc1   | - |
| DMM11 | Cdkn2a <sup>-/-</sup> _C57 | SIN.LV.SF.GFP | SPLEEN       | 2 | 22879562 | - | NM_001077190 | Abi1     | - |
| DMM3  | Cdkn2a <sup>-/-</sup> _C57 | SIN.LV.SF.GFP | LIVER        | 2 | 23400671 | - | NM_029773    | Spopl    | - |
| DMM8  | Cdkn2a <sup>-/-</sup> _C57 | SIN.LV.SF.GFP | VER - SPLEEN | 2 | 23430831 | - | NM_029773    | Spopl    | - |
| DMM1  | Cdkn2a <sup>-/-</sup> _C57 | SIN.LV.SF.GFP | LIVER        | 2 | 24190065 | - | NM_031167    | Ilrn     | + |
| DMM5  | Cdkn2a <sup>-/-</sup> _C57 | SIN.LV.SF.GFP | LIVER        | 2 | 35041581 | - | NM_026697    | Rab14    | - |
| DMM14 | Cdkn2a <sup>-/-</sup> _C57 | SIN.LV.SF.GFP | LIVER        | 2 | 37264176 | + | NM_001100591 | Rc3h2    | - |
| DMM9  | Cdkn2a <sup>-/-</sup> _C57 | SIN.LV.SF.GFP | LIVER        | 2 | 37414921 | - | NM_146121    | Rabgap1  | + |
| DMM14 | Cdkn2a <sup>-/-</sup> _C57 | SIN.LV.SF.GFP | LIVER        | 2 | 37979444 | + | NM_146122    | Dennd1a  | - |
| DMM9  | Cdkn2a <sup>-/-</sup> _C57 | SIN.LV.SF.GFP | VER - SPLEEN | 2 | 38769529 | + | NM_010264    | Nr6a1    | - |
| DMM9  | Cdkn2a <sup>-/-</sup> _C57 | SIN.LV.SF.GFP | LIVER        | 2 | 38769657 | - | NM_010264    | Nr6a1    | - |
| DMM9  | Cdkn2a <sup>-/-</sup> _C57 | SIN.LV.SF.GFP | LIVER        | 2 | 38769723 | - | NM_010264    | Nr6a1    | - |
| DMM7  | Cdkn2a <sup>-/-</sup> _C57 | SIN.LV.SF.GFP | SPLEEN       | 2 | 38903983 | - | NM_029793    | Golga1   | - |
| DMM1  | Cdkn2a <sup>-/-</sup> _C57 | SIN.LV.SF.GFP | SPLEEN       | 2 | 39549662 | + | NM_024209    | Ppp6c    | - |
| DMM2  | Cdkn2a <sup>-/-</sup> _C57 | SIN.LV.SF.GFP | LIVER        | 2 | 42045914 | - | NM_053011    | Lrp1b    | - |
| DMM18 | Cdkn2a <sup>-/-</sup> _C57 | SIN.LV.SF.GFP | LIVER        | 2 | 43119030 | - | NM_027552    | Kynu     | + |
| DMM18 | Cdkn2a <sup>-/-</sup> _C57 | SIN.LV.SF.GFP | LIVER        | 2 | 43119045 | - | NM_027552    | Kynu     | + |
| DMM3  | Cdkn2a <sup>-/-</sup> _C57 | SIN.LV.SF.GFP | LIVER        | 2 | 43782386 | - | NM_153820    | Arhgap15 | + |
| DMM5  | Cdkn2a <sup>-/-</sup> _C57 | SIN.LV.SF.GFP | LIVER        | 2 | 43816672 | - | NM_153820    | Arhgap15 | + |
| DMM9  | Cdkn2a <sup>-/-</sup> _C57 | SIN.LV.SF.GFP | LIVER        | 2 | 43891158 | + | NM_153820    | Arhgap15 | + |
| DMM1  | Cdkn2a <sup>-/-</sup> _C57 | SIN.LV.SF.GFP | LIVER        | 2 | 44583810 | + | NM_172662    | Gtdc1    | - |
| DMM5  | Cdkn2a <sup>-/-</sup> _C57 | SIN.LV.SF.GFP | LIVER        | 2 | 44595801 | - | NM_172662    | Gtdc1    | - |
| DMM14 | Cdkn2a <sup>-/-</sup> _C57 | SIN.LV.SF.GFP | LIVER        | 2 | 44704162 | + | NM_172662    | Gtdc1    | - |
| DMM14 | Cdkn2a <sup>-/-</sup> _C57 | SIN.LV.SF.GFP | LIVER        | 2 | 45139470 | + | NM_015753    | Zeb2     | - |
| DMM7  | Cdkn2a <sup>-/-</sup> _C57 | SIN.LV.SF.GFP | LIVER        | 2 | 48226625 | + | NM_007396    | Acvr2a   | + |
| DMM9  | Cdkn2a <sup>-/-</sup> _C57 | SIN.LV.SF.GFP | SPLEEN       | 2 | 48652170 | + | NM_007396    | Acvr2a   | + |
| DMM1  | Cdkn2a <sup>-/-</sup> _C57 | SIN.LV.SF.GFP | LIVER        | 2 | 48794125 | - | NM_011958    | Orc4l    | - |
| DMM3  | Cdkn2a <sup>-/-</sup> _C57 | SIN.LV.SF.GFP | LIVER        | 2 | 48811677 | - | NM_029924    | Mbd5     | + |
| DMM7  | Cdkn2a <sup>-/-</sup> _C57 | SIN.LV.SF.GFP | LIVER        | 2 | 49025050 | - | NM_029924    | Mbd5     | + |



|       |                            |               |        |   |          |   |              |               |   |
|-------|----------------------------|---------------|--------|---|----------|---|--------------|---------------|---|
| DMM1  | Cdkn2a <sup>-/-</sup> _C57 | SIN.LV.SF.GFP | LIVER  | 2 | 49089442 | - | NM_029924    | Mbd5          | + |
| DMM1  | Cdkn2a <sup>-/-</sup> _C57 | SIN.LV.SF.GFP | LIVER  | 2 | 49381527 | + | NM_172663    | Epc2          | + |
| DMM5  | Cdkn2a <sup>-/-</sup> _C57 | SIN.LV.SF.GFP | LIVER  | 2 | 50388042 | - | NM_133839    | Mmadhc        | - |
| DMM14 | Cdkn2a <sup>-/-</sup> _C57 | SIN.LV.SF.GFP | LIVER  | 2 | 52923255 | - | NM_172409    | Fmnl2         | + |
| DMM3  | Cdkn2a <sup>-/-</sup> _C57 | SIN.LV.SF.GFP | LIVER  | 2 | 53011705 | - | NM_018785    | Prpf40a       | - |
| DMM1  | Cdkn2a <sup>-/-</sup> _C57 | SIN.LV.SF.GFP | LIVER  | 2 | 56171332 | + | NM_008426    | Kcnj3         | + |
| DMM1  | Cdkn2a <sup>-/-</sup> _C57 | SIN.LV.SF.GFP | LIVER  | 2 | 57211834 | - | NM_001145820 | Gpd2          | + |
| DMM13 | Cdkn2a <sup>-/-</sup> _C57 | SIN.LV.SF.GFP | SPLEEN | 2 | 57982823 | - | NM_139200    | Cytip         | - |
| DMM14 | Cdkn2a <sup>-/-</sup> _C57 | SIN.LV.SF.GFP | SPLEEN | 2 | 59819324 | - | NM_001001182 | Baz2b         | - |
| DMM1  | Cdkn2a <sup>-/-</sup> _C57 | SIN.LV.SF.GFP | SPLEEN | 2 | 60522620 | + | NM_001159564 | Itgb6         | - |
| DMM1  | Cdkn2a <sup>-/-</sup> _C57 | SIN.LV.SF.GFP | LIVER  | 2 | 61418086 | + | NM_011529    | Tank          | + |
| DMM5  | Cdkn2a <sup>-/-</sup> _C57 | SIN.LV.SF.GFP | LIVER  | 2 | 61557465 | - | NM_021526    | Psm14         | + |
| DMM1  | Cdkn2a <sup>-/-</sup> _C57 | SIN.LV.SF.GFP | LIVER  | 2 | 61604147 | + | NM_021526    | Psm14         | + |
| DMM1  | Cdkn2a <sup>-/-</sup> _C57 | SIN.LV.SF.GFP | LIVER  | 2 | 62439540 | + | NM_027835    | Ifih1         | - |
| DMM1  | Cdkn2a <sup>-/-</sup> _C57 | SIN.LV.SF.GFP | LIVER  | 2 | 65028132 | - | NM_027225    | Cobll1        | - |
| DMM3  | Cdkn2a <sup>-/-</sup> _C57 | SIN.LV.SF.GFP | LIVER  | 2 | 65185658 | - | NM_177074    | Slc38a11      | - |
| DMM3  | Cdkn2a <sup>-/-</sup> _C57 | SIN.LV.SF.GFP | LIVER  | 2 | 65933722 | - | NM_015736    | Galnt3        | - |
| DMM18 | Cdkn2a <sup>-/-</sup> _C57 | SIN.LV.SF.GFP | SPLEEN | 2 | 66086714 | - | NM_001047604 | Ttc21b        | - |
| DMM1  | Cdkn2a <sup>-/-</sup> _C57 | SIN.LV.SF.GFP | LIVER  | 2 | 66582246 | - | NM_009135    | Scn7a         | - |
| DMM1  | Cdkn2a <sup>-/-</sup> _C57 | SIN.LV.SF.GFP | LIVER  | 2 | 68642287 | + | NM_183113    | 4932414N04Rik | + |
| DMM3  | Cdkn2a <sup>-/-</sup> _C57 | SIN.LV.SF.GFP | LIVER  | 2 | 69036117 | + | NM_025565    | Sp25          | - |
| DMM1  | Cdkn2a <sup>-/-</sup> _C57 | SIN.LV.SF.GFP | LIVER  | 2 | 72696223 | + | NM_001018042 | Sp3           | - |
| DMM5  | Cdkn2a <sup>-/-</sup> _C57 | SIN.LV.SF.GFP | LIVER  | 2 | 74688659 | - | NM_016804    | Mtx2          | + |
| DMM18 | Cdkn2a <sup>-/-</sup> _C57 | SIN.LV.SF.GFP | SPLEEN | 2 | 76225102 | + | NM_153405    | Rbm45         | + |
| DMM18 | Cdkn2a <sup>-/-</sup> _C57 | SIN.LV.SF.GFP | SPLEEN | 2 | 77754669 | - | NM_030560    | Cwc22         | - |
| DMM3  | Cdkn2a <sup>-/-</sup> _C57 | SIN.LV.SF.GFP | LIVER  | 2 | 77754748 | - | NM_030560    | Cwc22         | - |
| DMM1  | Cdkn2a <sup>-/-</sup> _C57 | SIN.LV.SF.GFP | LIVER  | 2 | 77776919 | - | NM_030560    | Cwc22         | - |
| DMM1  | Cdkn2a <sup>-/-</sup> _C57 | SIN.LV.SF.GFP | LIVER  | 2 | 79142327 | - | NM_010576    | Itga4         | + |
| DMM5  | Cdkn2a <sup>-/-</sup> _C57 | SIN.LV.SF.GFP | LIVER  | 2 | 79540622 | - | NM_172420    | Ppp1r1c       | + |
| DMM1  | Cdkn2a <sup>-/-</sup> _C57 | SIN.LV.SF.GFP | LIVER  | 2 | 79811632 | - | NM_001159582 | Pdel1a        | - |
| DMM18 | Cdkn2a <sup>-/-</sup> _C57 | SIN.LV.SF.GFP | SPLEEN | 2 | 79870048 | + | NM_016744    | Pdel1a        | - |

|       |                            |               |              |   |           |   |              |               |   |
|-------|----------------------------|---------------|--------------|---|-----------|---|--------------|---------------|---|
| DMM18 | Cdkn2a <sup>-/-</sup> _C57 | SIN.LV.SF.GFP | SPLEEN       | 2 | 79870218  | - | NM_016744    | Pde1a         | - |
| DMM14 | Cdkn2a <sup>-/-</sup> _C57 | SIN.LV.SF.GFP | LIVER        | 2 | 80171962  | - | NM_024181    | Dnajc10       | + |
| DMM14 | Cdkn2a <sup>-/-</sup> _C57 | SIN.LV.SF.GFP | SPLEEN       | 2 | 83608877  | - | NM_008402    | Itgav         | + |
| DMM3  | Cdkn2a <sup>-/-</sup> _C57 | SIN.LV.SF.GFP | LIVER        | 2 | 84114688  | + | NM_018782    | Calcr1        | - |
| DMM14 | Cdkn2a <sup>-/-</sup> _C57 | SIN.LV.SF.GFP | LIVER        | 2 | 84189880  | + | NM_018782    | Calcr1        | - |
| DMM14 | Cdkn2a <sup>-/-</sup> _C57 | SIN.LV.SF.GFP | LIVER        | 2 | 84218448  | - | NM_018782    | Calcr1        | - |
| DMM5  | Cdkn2a <sup>-/-</sup> _C57 | SIN.LV.SF.GFP | LIVER        | 2 | 84258250  | - | NM_018782    | Calcr1        | - |
| DMM1  | Cdkn2a <sup>-/-</sup> _C57 | SIN.LV.SF.GFP | LIVER        | 2 | 86423797  | - | NM_207674    | Olfr1082      | - |
| DMM1  | Cdkn2a <sup>-/-</sup> _C57 | SIN.LV.SF.GFP | SPLEEN       | 2 | 89859191  | + | NM_021368    | Olfr1264      | - |
| DMM9  | Cdkn2a <sup>-/-</sup> _C57 | SIN.LV.SF.GFP | SPLEEN       | 2 | 90348706  | - | NM_008982    | Ptprj         | - |
| DMM1  | Cdkn2a <sup>-/-</sup> _C57 | SIN.LV.SF.GFP | LIVER        | 2 | 90563418  | + | NM_021512    | Nup160        | + |
| DMM1  | Cdkn2a <sup>-/-</sup> _C57 | SIN.LV.SF.GFP | LIVER        | 2 | 91664061  | - | NM_001080754 | Ambra1        | + |
| DMM18 | Cdkn2a <sup>-/-</sup> _C57 | SIN.LV.SF.GFP | SPLEEN       | 2 | 91750831  | + | NM_001080754 | Ambra1        | + |
| DMM3  | Cdkn2a <sup>-/-</sup> _C57 | SIN.LV.SF.GFP | SPLEEN       | 2 | 92116432  | - | NM_001109690 | Phf21a        | + |
| DMM18 | Cdkn2a <sup>-/-</sup> _C57 | SIN.LV.SF.GFP | SPLEEN       | 2 | 98502488  | + | NM_178725    | Lrrc4c        | + |
| DMM7  | Cdkn2a <sup>-/-</sup> _C57 | SIN.LV.SF.GFP | LIVER        | 2 | 98503987  | + | NM_178725    | Lrrc4c        | + |
| DMM7  | Cdkn2a <sup>-/-</sup> _C57 | SIN.LV.SF.GFP | LIVER        | 2 | 98504061  | - | NM_178725    | Lrrc4c        | + |
| DMM3  | Cdkn2a <sup>-/-</sup> _C57 | SIN.LV.SF.GFP | LIVER        | 2 | 98506821  | - | NM_178725    | Lrrc4c        | + |
| DMM13 | Cdkn2a <sup>-/-</sup> _C57 | SIN.LV.SF.GFP | SPLEEN       | 2 | 98507043  | - | NM_178725    | Lrrc4c        | + |
| DMM11 | Cdkn2a <sup>-/-</sup> _C57 | SIN.LV.SF.GFP | VER - SPLEEN | 2 | 98507063  | - | NM_178725    | Lrrc4c        | + |
| DMM3  | Cdkn2a <sup>-/-</sup> _C57 | SIN.LV.SF.GFP | SPLEEN       | 2 | 98507206  | + | NM_178725    | Lrrc4c        | + |
| DMM3  | Cdkn2a <sup>-/-</sup> _C57 | SIN.LV.SF.GFP | LIVER        | 2 | 98507309  | - | NM_178725    | Lrrc4c        | + |
| DMM18 | Cdkn2a <sup>-/-</sup> _C57 | SIN.LV.SF.GFP | LIVER        | 2 | 98507431  | - | NM_178725    | Lrrc4c        | + |
| DMM14 | Cdkn2a <sup>-/-</sup> _C57 | SIN.LV.SF.GFP | LIVER        | 2 | 101824184 | - | NM_178886    | Ldlrad3       | - |
| DMM5  | Cdkn2a <sup>-/-</sup> _C57 | SIN.LV.SF.GFP | LIVER        | 2 | 105794212 | - | NM_028260    | Immp11        | + |
| DMM1  | Cdkn2a <sup>-/-</sup> _C57 | SIN.LV.SF.GFP | LIVER        | 2 | 109138380 | + | NM_139303    | Kif18a        | + |
| DMM5  | Cdkn2a <sup>-/-</sup> _C57 | SIN.LV.SF.GFP | LIVER        | 2 | 109878454 | - | NM_026613    | Ccdc34        | + |
| DMM7  | Cdkn2a <sup>-/-</sup> _C57 | SIN.LV.SF.GFP | LIVER        | 2 | 112304843 | - | NM_133749    | 2900064A13Rik | + |
| DMM1  | Cdkn2a <sup>-/-</sup> _C57 | SIN.LV.SF.GFP | LIVER        | 2 | 112476919 | - | NM_177652    | Ryr3          | - |
| DMM1  | Cdkn2a <sup>-/-</sup> _C57 | SIN.LV.SF.GFP | LIVER        | 2 | 113305538 | + | NM_001043322 | Fmn1          | + |
| DMM3  | Cdkn2a <sup>-/-</sup> _C57 | SIN.LV.SF.GFP | LIVER        | 2 | 113366628 | - | NM_001043322 | Fmn1          | + |

|       |                            |               |        |   |           |   |              |               |   |
|-------|----------------------------|---------------|--------|---|-----------|---|--------------|---------------|---|
| DMM1  | Cdkn2a <sup>-/-</sup> _C57 | SIN.LV.SF.GFP | LIVER  | 2 | 114365413 | - | NM_025675    | Atpbd4        | - |
| DMM2  | Cdkn2a <sup>-/-</sup> _C57 | SIN.LV.SF.GFP | LIVER  | 2 | 115408663 | + | NM_001145898 | BC052040      | + |
| DMM2  | Cdkn2a <sup>-/-</sup> _C57 | SIN.LV.SF.GFP | LIVER  | 2 | 115408711 | - | NM_001145898 | BC052040      | + |
| DMM5  | Cdkn2a <sup>-/-</sup> _C57 | SIN.LV.SF.GFP | LIVER  | 2 | 115508027 | + | NM_001145898 | BC052040      | + |
| DMM3  | Cdkn2a <sup>-/-</sup> _C57 | SIN.LV.SF.GFP | LIVER  | 2 | 115601333 | + | NM_001145898 | BC052040      | + |
| DMM12 | Cdkn2a <sup>-/-</sup> _C57 | SIN.LV.SF.GFP | SPLEEN | 2 | 115605758 | - | NM_001145898 | BC052040      | + |
| DMM14 | Cdkn2a <sup>-/-</sup> _C57 | SIN.LV.SF.GFP | LIVER  | 2 | 116963323 | - | NM_033524    | Spred1        | + |
| DMM5  | Cdkn2a <sup>-/-</sup> _C57 | SIN.LV.SF.GFP | LIVER  | 2 | 116980384 | + | NM_033524    | Spred1        | + |
| DMM3  | Cdkn2a <sup>-/-</sup> _C57 | SIN.LV.SF.GFP | LIVER  | 2 | 116985364 | + | NM_033524    | Spred1        | + |
| DMM9  | Cdkn2a <sup>-/-</sup> _C57 | SIN.LV.SF.GFP | SPLEEN | 2 | 117203910 | - | NM_011246    | Rasgrp1       | - |
| DMM1  | Cdkn2a <sup>-/-</sup> _C57 | SIN.LV.SF.GFP | LIVER  | 2 | 118325155 | + | NM_009273    | Srp14         | - |
| DMM3  | Cdkn2a <sup>-/-</sup> _C57 | SIN.LV.SF.GFP | LIVER  | 2 | 118886591 | + | NM_029617    | Casc5         | + |
| DMM5  | Cdkn2a <sup>-/-</sup> _C57 | SIN.LV.SF.GFP | LIVER  | 2 | 120396677 | + | NM_009222    | Snap23        | + |
| DMM1  | Cdkn2a <sup>-/-</sup> _C57 | SIN.LV.SF.GFP | SPLEEN | 2 | 120585055 | - | NM_001024856 | Ttbk2         | - |
| DMM7  | Cdkn2a <sup>-/-</sup> _C57 | SIN.LV.SF.GFP | SPLEEN | 2 | 122432175 | - | NM_025961    | Gatm          | - |
| DMM1  | Cdkn2a <sup>-/-</sup> _C57 | SIN.LV.SF.GFP | LIVER  | 2 | 124352709 | + | NM_172537    | Sema6d        | + |
| DMM1  | Cdkn2a <sup>-/-</sup> _C57 | SIN.LV.SF.GFP | LIVER  | 2 | 124914900 | + | NM_010852    | Myef2         | - |
| DMM5  | Cdkn2a <sup>-/-</sup> _C57 | SIN.LV.SF.GFP | LIVER  | 2 | 125505060 | - | NM_199022    | Shc4          | - |
| DMM5  | Cdkn2a <sup>-/-</sup> _C57 | SIN.LV.SF.GFP | LIVER  | 2 | 131908510 | - | NM_018824    | Slc23a2       | - |
| DMM18 | Cdkn2a <sup>-/-</sup> _C57 | SIN.LV.SF.GFP | LIVER  | 2 | 132389462 | + | NM_001042671 | Prei4         | - |
| DMM13 | Cdkn2a <sup>-/-</sup> _C57 | SIN.LV.SF.GFP | SPLEEN | 2 | 132395759 | + | NM_001042671 | Prei4         | - |
| DMM3  | Cdkn2a <sup>-/-</sup> _C57 | SIN.LV.SF.GFP | LIVER  | 2 | 133292254 | - | NM_007553    | Bmp2          | + |
| DMM1  | Cdkn2a <sup>-/-</sup> _C57 | SIN.LV.SF.GFP | SPLEEN | 2 | 134945956 | - | NM_001145830 | Plcb1         | + |
| DMM3  | Cdkn2a <sup>-/-</sup> _C57 | SIN.LV.SF.GFP | LIVER  | 2 | 139745434 | - | NM_001159640 | Tasp1         | - |
| DMM3  | Cdkn2a <sup>-/-</sup> _C57 | SIN.LV.SF.GFP | LIVER  | 2 | 139747766 | + | NM_001159640 | Tasp1         | - |
| DMM14 | Cdkn2a <sup>-/-</sup> _C57 | SIN.LV.SF.GFP | LIVER  | 2 | 139750169 | + | NM_001159640 | Tasp1         | - |
| DMM7  | Cdkn2a <sup>-/-</sup> _C57 | SIN.LV.SF.GFP | LIVER  | 2 | 140606041 | - | NM_001013802 | MacroD2       | + |
| DMM3  | Cdkn2a <sup>-/-</sup> _C57 | SIN.LV.SF.GFP | LIVER  | 2 | 142628238 | + | NM_001081133 | Kif16b        | - |
| DMM1  | Cdkn2a <sup>-/-</sup> _C57 | SIN.LV.SF.GFP | LIVER  | 2 | 142634283 | + | NM_001081133 | Kif16b        | - |
| DMM11 | Cdkn2a <sup>-/-</sup> _C57 | SIN.LV.SF.GFP | SPLEEN | 2 | 144097685 | - | NM_028984    | 8430406I07Rik | + |
| DMM3  | Cdkn2a <sup>-/-</sup> _C57 | SIN.LV.SF.GFP | LIVER  | 2 | 145919256 | - | NM_016889    | Insm1         | + |

|       |                            |               |                |   |           |   |              |               |   |
|-------|----------------------------|---------------|----------------|---|-----------|---|--------------|---------------|---|
| DMM3  | Cdkn2a <sup>-/-</sup> _C57 | SIN.LV.SF.GFP | LIVER          | 2 | 146273695 | + | NM_001033348 | A230067G21Rik | - |
| DMM12 | Cdkn2a <sup>-/-</sup> _C57 | SIN.LV.SF.GFP | LIVER - SPLEEN | 2 | 146696408 | + | NM_001033298 | Ncrna00153    | + |
| DMM8  | Cdkn2a <sup>-/-</sup> _C57 | SIN.LV.SF.GFP | LIVER          | 2 | 148791837 | - | NM_009976    | Cst3          | - |
| DMM1  | Cdkn2a <sup>-/-</sup> _C57 | SIN.LV.SF.GFP | SPLEEN         | 2 | 150680470 | - | NM_024465    | Abhd12        | - |
| DMM9  | Cdkn2a <sup>-/-</sup> _C57 | SIN.LV.SF.GFP | SPLEEN         | 2 | 150743835 | - | NM_024465    | Abhd12        | - |
| DMM7  | Cdkn2a <sup>-/-</sup> _C57 | SIN.LV.SF.GFP | SPLEEN         | 2 | 154308762 | + | NM_009823    | Cbfa2t2       | + |
| DMM8  | Cdkn2a <sup>-/-</sup> _C57 | SIN.LV.SF.GFP | LIVER          | 2 | 157904858 | + | NM_027434    | Rprd1b        | + |
| DMM9  | Cdkn2a <sup>-/-</sup> _C57 | SIN.LV.SF.GFP | LIVER          | 2 | 159644315 | - | NM_001033411 | Gm826         | - |
| DMM14 | Cdkn2a <sup>-/-</sup> _C57 | SIN.LV.SF.GFP | LIVER          | 2 | 160482138 | + | NM_009408    | Top1          | + |
| DMM7  | Cdkn2a <sup>-/-</sup> _C57 | SIN.LV.SF.GFP | LIVER          | 2 | 160507347 | - | NM_009408    | Top1          | + |
| DMM8  | Cdkn2a <sup>-/-</sup> _C57 | SIN.LV.SF.GFP | LIVER          | 2 | 160673366 | + | NM_177263    | Zhx3          | - |
| DMM18 | Cdkn2a <sup>-/-</sup> _C57 | SIN.LV.SF.GFP | SPLEEN         | 2 | 160912623 | - | NM_173368    | Chd6          | - |
| DMM7  | Cdkn2a <sup>-/-</sup> _C57 | SIN.LV.SF.GFP | LIVER          | 2 | 160933028 | - | NM_173368    | Chd6          | - |
| DMM14 | Cdkn2a <sup>-/-</sup> _C57 | SIN.LV.SF.GFP | LIVER          | 2 | 166872865 | - | NM_001033196 | Znfx1         | - |
| DMM3  | Cdkn2a <sup>-/-</sup> _C57 | SIN.LV.SF.GFP | LIVER          | 2 | 169526647 | + | NM_080455    | Tshz2         | + |
| DMM1  | Cdkn2a <sup>-/-</sup> _C57 | SIN.LV.SF.GFP | LIVER          | 2 | 169966125 | - | NM_001159683 | Zfp217        | - |
| DMM9  | Cdkn2a <sup>-/-</sup> _C57 | SIN.LV.SF.GFP | LIVER          | 2 | 172205280 | + | NM_024199    | Cstf1         | + |
| DMM3  | Cdkn2a <sup>-/-</sup> _C57 | SIN.LV.SF.GFP | LIVER          | 2 | 172289943 | + | NM_025542    | 2410001C21Rik | + |
| DMM2  | Cdkn2a <sup>-/-</sup> _C57 | SIN.LV.SF.GFP | SPLEEN         | 2 | 172335964 | - | NM_029608    | 1700029J11Rik | + |
| DMM7  | Cdkn2a <sup>-/-</sup> _C57 | SIN.LV.SF.GFP | SPLEEN         | 2 | 173909829 | + | NM_001102423 | Stx16         | + |
| DMM5  | Cdkn2a <sup>-/-</sup> _C57 | SIN.LV.SF.GFP | SPLEEN         | 2 | 179662055 | + | NM_001081092 | Taf4a         | - |
| DMM5  | Cdkn2a <sup>-/-</sup> _C57 | SIN.LV.SF.GFP | LIVER          | 2 | 181107535 | + | NM_001048148 | Zgpat         | + |
| DMM9  | Cdkn2a <sup>-/-</sup> _C57 | SIN.LV.SF.GFP | LIVER          | 3 | 5370734   | + | NM_030708    | Zfhx4         | + |
| DMM3  | Cdkn2a <sup>-/-</sup> _C57 | SIN.LV.SF.GFP | LIVER          | 3 | 5873478   | + | NM_008994    | Pxmp3         | - |
| DMM5  | Cdkn2a <sup>-/-</sup> _C57 | SIN.LV.SF.GFP | LIVER          | 3 | 8824160   | - | NM_025434    | Mrps28        | - |
| DMM1  | Cdkn2a <sup>-/-</sup> _C57 | SIN.LV.SF.GFP | LIVER          | 3 | 8852353   | - | NM_025434    | Mrps28        | - |
| DMM1  | Cdkn2a <sup>-/-</sup> _C57 | SIN.LV.SF.GFP | LIVER          | 3 | 8928812   | - | NM_001025261 | Tpd52         | - |
| DMM7  | Cdkn2a <sup>-/-</sup> _C57 | SIN.LV.SF.GFP | SPLEEN         | 3 | 9265494   | - | NM_133218    | Zfp704        | - |
| DMM5  | Cdkn2a <sup>-/-</sup> _C57 | SIN.LV.SF.GFP | LIVER          | 3 | 10414891  | + | NM_001127191 | Snx16         | - |
| DMM1  | Cdkn2a <sup>-/-</sup> _C57 | SIN.LV.SF.GFP | LIVER          | 3 | 10421538  | + | NM_001127191 | Snx16         | - |
| DMM3  | Cdkn2a <sup>-/-</sup> _C57 | SIN.LV.SF.GFP | LIVER          | 3 | 10431409  | - | NM_001127191 | Snx16         | - |

|       |                            |               |        |   |          |   |              |            |   |
|-------|----------------------------|---------------|--------|---|----------|---|--------------|------------|---|
| DMM2  | Cdkn2a <sup>-/-</sup> _C57 | SIN.LV.SF.GFP | SPLEEN | 3 | 11306135 | + | NM_001127191 | Snx16      | - |
| DMM5  | Cdkn2a <sup>-/-</sup> _C57 | SIN.LV.SF.GFP | LIVER  | 3 | 14656406 | + | NM_024495    | Car13      | + |
| DMM3  | Cdkn2a <sup>-/-</sup> _C57 | SIN.LV.SF.GFP | LIVER  | 3 | 14895075 | + | NM_009801    | Car2       | + |
| DMM7  | Cdkn2a <sup>-/-</sup> _C57 | SIN.LV.SF.GFP | LIVER  | 3 | 14947638 | - | NM_009801    | Car2       | + |
| DMM14 | Cdkn2a <sup>-/-</sup> _C57 | SIN.LV.SF.GFP | LIVER  | 3 | 15337298 | - | NM_001076679 | Gm9733     | - |
| DMM5  | Cdkn2a <sup>-/-</sup> _C57 | SIN.LV.SF.GFP | LIVER  | 3 | 15856300 | + | NM_001081687 | Gm5150     | - |
| DMM2  | Cdkn2a <sup>-/-</sup> _C57 | SIN.LV.SF.GFP | LIVER  | 3 | 16095835 | - | NM_001145919 | Ythdf3     | + |
| DMM1  | Cdkn2a <sup>-/-</sup> _C57 | SIN.LV.SF.GFP | SPLEEN | 3 | 18214395 | + | NM_007825    | Cyp7b1     | - |
| DMM1  | Cdkn2a <sup>-/-</sup> _C57 | SIN.LV.SF.GFP | LIVER  | 3 | 19092794 | + | NM_026182    | Mtfr1      | + |
| DMM3  | Cdkn2a <sup>-/-</sup> _C57 | SIN.LV.SF.GFP | SPLEEN | 3 | 20994367 | - | NM_175086    | Agtr1b     | - |
| DMM9  | Cdkn2a <sup>-/-</sup> _C57 | SIN.LV.SF.GFP | LIVER  | 3 | 22063460 | + | NM_030732    | Tbl1xr1    | + |
| DMM14 | Cdkn2a <sup>-/-</sup> _C57 | SIN.LV.SF.GFP | LIVER  | 3 | 27418285 | - | NM_173182    | Fndc3b     | - |
| DMM1  | Cdkn2a <sup>-/-</sup> _C57 | SIN.LV.SF.GFP | LIVER  | 3 | 27575081 | - | NM_173182    | Fndc3b     | - |
| DMM9  | Cdkn2a <sup>-/-</sup> _C57 | SIN.LV.SF.GFP | LIVER  | 3 | 28014521 | - | NM_008875    | Pld1       | + |
| DMM1  | Cdkn2a <sup>-/-</sup> _C57 | SIN.LV.SF.GFP | LIVER  | 3 | 28972803 | - | NM_001033479 | Gm1527     | + |
| DMM5  | Cdkn2a <sup>-/-</sup> _C57 | SIN.LV.SF.GFP | LIVER  | 3 | 29750864 | + | NM_007963    | Evi1       | - |
| DMM3  | Cdkn2a <sup>-/-</sup> _C57 | SIN.LV.SF.GFP | LIVER  | 3 | 30931752 | + | NM_008857    | Prkci      | + |
| DMM3  | Cdkn2a <sup>-/-</sup> _C57 | SIN.LV.SF.GFP | LIVER  | 3 | 32361028 | - | NM_008839    | Pik3ca     | + |
| DMM5  | Cdkn2a <sup>-/-</sup> _C57 | SIN.LV.SF.GFP | LIVER  | 3 | 33921456 | - | NM_001113188 | Fxr1       | + |
| DMM1  | Cdkn2a <sup>-/-</sup> _C57 | SIN.LV.SF.GFP | LIVER  | 3 | 33946679 | + | NM_001113188 | Fxr1       | + |
| DMM2  | Cdkn2a <sup>-/-</sup> _C57 | SIN.LV.SF.GFP | LIVER  | 3 | 35710712 | - | NM_029570    | Atp11b     | + |
| DMM14 | Cdkn2a <sup>-/-</sup> _C57 | SIN.LV.SF.GFP | LIVER  | 3 | 35801238 | + | NM_033623    | Dcun1d1    | - |
| DMM3  | Cdkn2a <sup>-/-</sup> _C57 | SIN.LV.SF.GFP | LIVER  | 3 | 35823848 | + | NM_033623    | Dcun1d1    | - |
| DMM1  | Cdkn2a <sup>-/-</sup> _C57 | SIN.LV.SF.GFP | LIVER  | 3 | 35887959 | + | NM_023644    | Mccc1      | - |
| DMM14 | Cdkn2a <sup>-/-</sup> _C57 | SIN.LV.SF.GFP | LIVER  | 3 | 36349999 | - | NM_009673    | Anxa5      | - |
| DMM12 | Cdkn2a <sup>-/-</sup> _C57 | SIN.LV.SF.GFP | SPLEEN | 3 | 38270063 | - | NM_001033198 | Ankrd50    | - |
| DMM18 | Cdkn2a <sup>-/-</sup> _C57 | SIN.LV.SF.GFP | SPLEEN | 3 | 40553948 | - | NM_011020    | Hspa4l     | + |
| DMM1  | Cdkn2a <sup>-/-</sup> _C57 | SIN.LV.SF.GFP | SPLEEN | 3 | 40584895 | + | NM_011020    | Hspa4l     | + |
| DMM1  | Cdkn2a <sup>-/-</sup> _C57 | SIN.LV.SF.GFP | LIVER  | 3 | 40881164 | - | NM_027558    | Pgrmc2     | - |
| DMM1  | Cdkn2a <sup>-/-</sup> _C57 | SIN.LV.SF.GFP | LIVER  | 3 | 41505697 | + | NM_001081411 | Sclt1      | - |
| DMM7  | Cdkn2a <sup>-/-</sup> _C57 | SIN.LV.SF.GFP | LIVER  | 3 | 42721306 | + | NM_001099785 | D3ErtD751e | + |

|       |                            |               |                |   |          |   |              |         |   |
|-------|----------------------------|---------------|----------------|---|----------|---|--------------|---------|---|
| DMM3  | Cdkn2a <sup>-/-</sup> _C57 | SIN.LV.SF.GFP | LIVER          | 3 | 45079425 | - | NM_001098170 | Pcdh10  | + |
| DMM5  | Cdkn2a <sup>-/-</sup> _C57 | SIN.LV.SF.GFP | LIVER          | 3 | 49552628 | - | NM_130448    | Pcdh18  | - |
| DMM14 | Cdkn2a <sup>-/-</sup> _C57 | SIN.LV.SF.GFP | LIVER          | 3 | 49996838 | + | NM_011990    | Slc7a11 | - |
| DMM1  | Cdkn2a <sup>-/-</sup> _C57 | SIN.LV.SF.GFP | SPLEEN         | 3 | 51075902 | + | NM_023502    | Elf2    | - |
| DMM7  | Cdkn2a <sup>-/-</sup> _C57 | SIN.LV.SF.GFP | LIVER          | 3 | 51083295 | - | NM_023502    | Elf2    | - |
| DMM12 | Cdkn2a <sup>-/-</sup> _C57 | SIN.LV.SF.GFP | LIVER          | 3 | 51257250 | + | NM_053089    | Narg1   | + |
| DMM12 | Cdkn2a <sup>-/-</sup> _C57 | SIN.LV.SF.GFP | LIVER          | 3 | 51257299 | - | NM_053089    | Narg1   | + |
| DMM12 | Cdkn2a <sup>-/-</sup> _C57 | SIN.LV.SF.GFP | LIVER          | 3 | 51257308 | - | NM_053089    | Narg1   | + |
| DMM1  | Cdkn2a <sup>-/-</sup> _C57 | SIN.LV.SF.GFP | LIVER          | 3 | 52555282 | - | NM_026225    | Cog6    | - |
| DMM12 | Cdkn2a <sup>-/-</sup> _C57 | SIN.LV.SF.GFP | LIVER          | 3 | 53814189 | + | NM_016984    | Trpc4   | + |
| DMM12 | Cdkn2a <sup>-/-</sup> _C57 | SIN.LV.SF.GFP | LIVER - SPLEEN | 3 | 53814326 | - | NM_016984    | Trpc4   | + |
| DMM3  | Cdkn2a <sup>-/-</sup> _C57 | SIN.LV.SF.GFP | LIVER          | 3 | 54541365 | - | NM_025442    | Alg5    | + |
| DMM3  | Cdkn2a <sup>-/-</sup> _C57 | SIN.LV.SF.GFP | LIVER          | 3 | 55485539 | + | NM_030595    | Nbea    | - |
| DMM12 | Cdkn2a <sup>-/-</sup> _C57 | SIN.LV.SF.GFP | SPLEEN         | 3 | 57052456 | + | NM_008536    | Tm4sf1  | - |
| DMM1  | Cdkn2a <sup>-/-</sup> _C57 | SIN.LV.SF.GFP | LIVER          | 3 | 57683924 | + | NM_019410    | Pfn2    | - |
| DMM3  | Cdkn2a <sup>-/-</sup> _C57 | SIN.LV.SF.GFP | SPLEEN         | 3 | 58203880 | - | NM_001081229 | Tsc22d2 | + |
| DMM1  | Cdkn2a <sup>-/-</sup> _C57 | SIN.LV.SF.GFP | SPLEEN         | 3 | 60172939 | + | NM_020007    | Mbnl1   | + |
| DMM5  | Cdkn2a <sup>-/-</sup> _C57 | SIN.LV.SF.GFP | LIVER          | 3 | 60271218 | - | NM_020007    | Mbnl1   | + |
| DMM14 | Cdkn2a <sup>-/-</sup> _C57 | SIN.LV.SF.GFP | LIVER          | 3 | 60376113 | + | NM_020007    | Mbnl1   | + |
| DMM1  | Cdkn2a <sup>-/-</sup> _C57 | SIN.LV.SF.GFP | LIVER          | 3 | 60379965 | - | NM_020007    | Mbnl1   | + |
| DMM5  | Cdkn2a <sup>-/-</sup> _C57 | SIN.LV.SF.GFP | LIVER          | 3 | 60387899 | + | NM_020007    | Mbnl1   | + |
| DMM5  | Cdkn2a <sup>-/-</sup> _C57 | SIN.LV.SF.GFP | LIVER          | 3 | 61268146 | + | NM_028712    | Rap2b   | + |
| DMM1  | Cdkn2a <sup>-/-</sup> _C57 | SIN.LV.SF.GFP | SPLEEN         | 3 | 61404311 | + | NM_028712    | Rap2b   | + |
| DMM3  | Cdkn2a <sup>-/-</sup> _C57 | SIN.LV.SF.GFP | LIVER          | 3 | 61656279 | + | NM_028712    | Rap2b   | + |
| DMM3  | Cdkn2a <sup>-/-</sup> _C57 | SIN.LV.SF.GFP | LIVER          | 3 | 62778460 | - | NM_008604    | Mme     | + |
| DMM5  | Cdkn2a <sup>-/-</sup> _C57 | SIN.LV.SF.GFP | LIVER          | 3 | 62780066 | + | NM_008604    | Mme     | + |
| DMM9  | Cdkn2a <sup>-/-</sup> _C57 | SIN.LV.SF.GFP | LIVER          | 3 | 65251952 | - | NM_026155    | Ssr3    | - |
| DMM5  | Cdkn2a <sup>-/-</sup> _C57 | SIN.LV.SF.GFP | LIVER          | 3 | 66815869 | - | NM_025822    | Rsrc1   | + |
| DMM6  | Cdkn2a <sup>-/-</sup> _C57 | SIN.LV.SF.GFP | LIVER - SPLEEN | 3 | 66947382 | + | NM_025822    | Rsrc1   | + |
| DMM11 | Cdkn2a <sup>-/-</sup> _C57 | SIN.LV.SF.GFP | LIVER          | 3 | 66947423 | - | NM_025822    | Rsrc1   | + |
| DMM6  | Cdkn2a <sup>-/-</sup> _C57 | SIN.LV.SF.GFP | LIVER          | 3 | 66947575 | - | NM_025822    | Rsrc1   | + |

|       |                            |               |              |   |           |   |              |               |   |
|-------|----------------------------|---------------|--------------|---|-----------|---|--------------|---------------|---|
| DMM2  | Cdkn2a <sup>-/-</sup> _C57 | SIN.LV.SF.GFP | LIVER        | 3 | 67103996  | + | NM_025822    | Rsrc1         | + |
| DMM14 | Cdkn2a <sup>-/-</sup> _C57 | SIN.LV.SF.GFP | SPLEEN       | 3 | 67362712  | - | NM_025813    | Mfsd1         | + |
| DMM1  | Cdkn2a <sup>-/-</sup> _C57 | SIN.LV.SF.GFP | LIVER        | 3 | 68721717  | + | NM_026641    | Ift80         | - |
| DMM1  | Cdkn2a <sup>-/-</sup> _C57 | SIN.LV.SF.GFP | LIVER        | 3 | 68906090  | + | NM_008467    | Kpna4         | - |
| DMM5  | Cdkn2a <sup>-/-</sup> _C57 | SIN.LV.SF.GFP | LIVER        | 3 | 68921526  | + | NM_008467    | Kpna4         | - |
| DMM3  | Cdkn2a <sup>-/-</sup> _C57 | SIN.LV.SF.GFP | LIVER        | 3 | 71105892  | - | NM_001018031 | Gm414         | + |
| DMM1  | Cdkn2a <sup>-/-</sup> _C57 | SIN.LV.SF.GFP | LIVER        | 3 | 75091163  | - | NM_026460    | Serpini2      | - |
| DMM1  | Cdkn2a <sup>-/-</sup> _C57 | SIN.LV.SF.GFP | LIVER        | 3 | 75346415  | - | NM_019745    | Pdcd10        | - |
| DMM5  | Cdkn2a <sup>-/-</sup> _C57 | SIN.LV.SF.GFP | LIVER        | 3 | 75684341  | - | NM_175193    | Golim4        | - |
| DMM14 | Cdkn2a <sup>-/-</sup> _C57 | SIN.LV.SF.GFP | LIVER        | 3 | 75747706  | + | NM_175193    | Golim4        | - |
| DMM3  | Cdkn2a <sup>-/-</sup> _C57 | SIN.LV.SF.GFP | LIVER        | 3 | 75762488  | + | NM_175193    | Golim4        | - |
| DMM14 | Cdkn2a <sup>-/-</sup> _C57 | SIN.LV.SF.GFP | SPLEEN       | 3 | 78941115  | + | NM_001099624 | Rapgef2       | - |
| DMM14 | Cdkn2a <sup>-/-</sup> _C57 | SIN.LV.SF.GFP | LIVER        | 3 | 79489718  | - | NM_212452    | Rxfp1         | - |
| DMM3  | Cdkn2a <sup>-/-</sup> _C57 | SIN.LV.SF.GFP | LIVER        | 3 | 80868990  | - | NM_019971    | Pdgfc         | + |
| DMM1  | Cdkn2a <sup>-/-</sup> _C57 | SIN.LV.SF.GFP | LIVER        | 3 | 80881885  | - | NM_019971    | Pdgfc         | + |
| DMM6  | Cdkn2a <sup>-/-</sup> _C57 | SIN.LV.SF.GFP | VER - SPLEEN | 3 | 80974316  | - | NM_019971    | Pdgfc         | + |
| DMM14 | Cdkn2a <sup>-/-</sup> _C57 | SIN.LV.SF.GFP | LIVER        | 3 | 83664859  | - | NM_011905    | Tlr2          | - |
| DMM1  | Cdkn2a <sup>-/-</sup> _C57 | SIN.LV.SF.GFP | LIVER        | 3 | 83770759  | + | NM_172681    | D930015E06Rik | - |
| DMM3  | Cdkn2a <sup>-/-</sup> _C57 | SIN.LV.SF.GFP | LIVER        | 3 | 86382763  | - | NM_001077687 | Lrba          | + |
| DMM1  | Cdkn2a <sup>-/-</sup> _C57 | SIN.LV.SF.GFP | LIVER        | 3 | 88255383  | + | NM_013658    | Sema4a        | - |
| DMM1  | Cdkn2a <sup>-/-</sup> _C57 | SIN.LV.SF.GFP | LIVER        | 3 | 88506522  | + | NM_028814    | 2810403A07Rik | + |
| DMM14 | Cdkn2a <sup>-/-</sup> _C57 | SIN.LV.SF.GFP | LIVER        | 3 | 90222194  | + | NM_145540    | Ints3         | - |
| DMM7  | Cdkn2a <sup>-/-</sup> _C57 | SIN.LV.SF.GFP | LIVER        | 3 | 94130971  | + | NM_029431    | Them4         | + |
| DMM1  | Cdkn2a <sup>-/-</sup> _C57 | SIN.LV.SF.GFP | LIVER        | 3 | 96543966  | - | NM_026406    | Rnf115        | + |
| DMM7  | Cdkn2a <sup>-/-</sup> _C57 | SIN.LV.SF.GFP | LIVER        | 3 | 96546166  | - | NM_026406    | Rnf115        | + |
| DMM5  | Cdkn2a <sup>-/-</sup> _C57 | SIN.LV.SF.GFP | LIVER        | 3 | 97912022  | + | NM_010928    | Notch2        | + |
| DMM3  | Cdkn2a <sup>-/-</sup> _C57 | SIN.LV.SF.GFP | LIVER        | 3 | 100426718 | + | NM_010763    | Man1a2        | - |
| DMM6  | Cdkn2a <sup>-/-</sup> _C57 | SIN.LV.SF.GFP | LIVER        | 3 | 101477001 | - | NM_144900    | Atp1a1        | - |
| DMM14 | Cdkn2a <sup>-/-</sup> _C57 | SIN.LV.SF.GFP | LIVER        | 3 | 102840756 | - | NM_144901    | Csde1         | + |
| DMM3  | Cdkn2a <sup>-/-</sup> _C57 | SIN.LV.SF.GFP | LIVER        | 3 | 102854587 | - | NM_144901    | Csde1         | + |
| DMM1  | Cdkn2a <sup>-/-</sup> _C57 | SIN.LV.SF.GFP | SPLEEN       | 3 | 103098965 | - | NM_001079830 | Trim33        | + |

|       |                            |               |                |   |           |   |              |               |   |
|-------|----------------------------|---------------|----------------|---|-----------|---|--------------|---------------|---|
| DMM5  | Cdkn2a <sup>-/-</sup> _C57 | SIN.LV.SF.GFP | LIVER          | 3 | 104618576 | + | NM_008619    | Mov10         | - |
| DMM5  | Cdkn2a <sup>-/-</sup> _C57 | SIN.LV.SF.GFP | LIVER          | 3 | 105568562 | - | NM_145541    | Rap1a         | - |
| DMM2  | Cdkn2a <sup>-/-</sup> _C57 | SIN.LV.SF.GFP | LIVER          | 3 | 105599461 | - | NM_145541    | Rap1a         | - |
| DMM18 | Cdkn2a <sup>-/-</sup> _C57 | SIN.LV.SF.GFP | SPLEEN         | 3 | 105773767 | - | NM_027432    | Wdr77         | + |
| DMM14 | Cdkn2a <sup>-/-</sup> _C57 | SIN.LV.SF.GFP | SPLEEN         | 3 | 106533529 | + | NM_001039478 | 4933421E11Rik | + |
| DMM7  | Cdkn2a <sup>-/-</sup> _C57 | SIN.LV.SF.GFP | LIVER          | 3 | 107024872 | - | NM_001111143 | Cym           | - |
| DMM5  | Cdkn2a <sup>-/-</sup> _C57 | SIN.LV.SF.GFP | LIVER          | 3 | 109238021 | - | NM_020505    | Vav3          | + |
| DMM14 | Cdkn2a <sup>-/-</sup> _C57 | SIN.LV.SF.GFP | SPLEEN         | 3 | 110049713 | + | NR_024139    | Prmt6         | - |
| DMM9  | Cdkn2a <sup>-/-</sup> _C57 | SIN.LV.SF.GFP | LIVER          | 3 | 112125359 | + | NM_009669    | Amy2a5        | - |
| DMM5  | Cdkn2a <sup>-/-</sup> _C57 | SIN.LV.SF.GFP | LIVER          | 3 | 115696008 | + | NM_023214    | Slc30a7       | - |
| DMM5  | Cdkn2a <sup>-/-</sup> _C57 | SIN.LV.SF.GFP | SPLEEN         | 3 | 117010176 | - | NM_177664    | D3Bwg0562e    | - |
| DMM1  | Cdkn2a <sup>-/-</sup> _C57 | SIN.LV.SF.GFP | LIVER          | 3 | 119426850 | - | NM_019550    | Ptbp2         | - |
| DMM3  | Cdkn2a <sup>-/-</sup> _C57 | SIN.LV.SF.GFP | LIVER          | 3 | 119762807 | - | NM_019550    | Ptbp2         | - |
| DMM5  | Cdkn2a <sup>-/-</sup> _C57 | SIN.LV.SF.GFP | LIVER          | 3 | 120867469 | + | NM_028456    | Rwdd3         | - |
| DMM1  | Cdkn2a <sup>-/-</sup> _C57 | SIN.LV.SF.GFP | LIVER          | 3 | 124848950 | + | NM_022565    | Ndst4         | + |
| DMM13 | Cdkn2a <sup>-/-</sup> _C57 | SIN.LV.SF.GFP | SPLEEN         | 3 | 126390393 | - | NM_001025438 | Camk2d        | + |
| DMM1  | Cdkn2a <sup>-/-</sup> _C57 | SIN.LV.SF.GFP | LIVER          | 3 | 126408119 | - | NM_001025438 | Camk2d        | + |
| DMM5  | Cdkn2a <sup>-/-</sup> _C57 | SIN.LV.SF.GFP | LIVER          | 3 | 126466132 | - | NM_001025438 | Camk2d        | + |
| DMM5  | Cdkn2a <sup>-/-</sup> _C57 | SIN.LV.SF.GFP | LIVER          | 3 | 126683190 | - | NM_178655    | Ank2          | - |
| DMM14 | Cdkn2a <sup>-/-</sup> _C57 | SIN.LV.SF.GFP | LIVER          | 3 | 126786477 | + | NM_178655    | Ank2          | - |
| DMM9  | Cdkn2a <sup>-/-</sup> _C57 | SIN.LV.SF.GFP | SPLEEN         | 3 | 126856512 | - | NM_178655    | Ank2          | - |
| DMM3  | Cdkn2a <sup>-/-</sup> _C57 | SIN.LV.SF.GFP | LIVER          | 3 | 127080937 | + | NM_138593    | Larp7         | - |
| DMM1  | Cdkn2a <sup>-/-</sup> _C57 | SIN.LV.SF.GFP | LIVER          | 3 | 129254507 | - | NM_130450    | Elovl6        | + |
| DMM5  | Cdkn2a <sup>-/-</sup> _C57 | SIN.LV.SF.GFP | LIVER          | 3 | 129977359 | + | NM_029838    | Col25a1       | + |
| DMM2  | Cdkn2a <sup>-/-</sup> _C57 | SIN.LV.SF.GFP | SPLEEN         | 3 | 130045538 | - | NM_029838    | Col25a1       | + |
| DMM12 | Cdkn2a <sup>-/-</sup> _C57 | SIN.LV.SF.GFP | LIVER          | 3 | 130578170 | + | NM_026724    | Rpl34         | - |
| DMM12 | Cdkn2a <sup>-/-</sup> _C57 | SIN.LV.SF.GFP | LIVER - SPLEEN | 3 | 130578255 | - | NM_026724    | Rpl34         | - |
| DMM14 | Cdkn2a <sup>-/-</sup> _C57 | SIN.LV.SF.GFP | LIVER          | 3 | 131532836 | + | NM_020265    | Dkk2          | + |
| DMM1  | Cdkn2a <sup>-/-</sup> _C57 | SIN.LV.SF.GFP | LIVER          | 3 | 131640434 | + | NM_020265    | Dkk2          | + |
| DMM2  | Cdkn2a <sup>-/-</sup> _C57 | SIN.LV.SF.GFP | LIVER          | 3 | 132686658 | + | NM_026231    | Gstcd         | - |
| DMM5  | Cdkn2a <sup>-/-</sup> _C57 | SIN.LV.SF.GFP | LIVER          | 3 | 132748439 | + | NM_026231    | Gstcd         | - |



|       |                            |               |              |   |           |   |              |               |   |
|-------|----------------------------|---------------|--------------|---|-----------|---|--------------|---------------|---|
| DMM14 | Cdkn2a <sup>-/-</sup> _C57 | SIN.LV.SF.GFP | LIVER        | 3 | 132752990 | - | NM_026231    | Gsted         | - |
| DMM1  | Cdkn2a <sup>-/-</sup> _C57 | SIN.LV.SF.GFP | LIVER        | 3 | 132759528 | - | NM_027927    | Ints12        | + |
| DMM7  | Cdkn2a <sup>-/-</sup> _C57 | SIN.LV.SF.GFP | LIVER        | 3 | 133135504 | + | NM_001040400 | Tet2          | - |
| DMM3  | Cdkn2a <sup>-/-</sup> _C57 | SIN.LV.SF.GFP | LIVER        | 3 | 134042870 | + | NM_001004367 | Cxxc4         | + |
| DMM9  | Cdkn2a <sup>-/-</sup> _C57 | SIN.LV.SF.GFP | LIVER        | 3 | 135074428 | + | NM_025902    | Cisd2         | - |
| DMM9  | Cdkn2a <sup>-/-</sup> _C57 | SIN.LV.SF.GFP | LIVER        | 3 | 135074616 | + | NM_025902    | Cisd2         | - |
| DMM1  | Cdkn2a <sup>-/-</sup> _C57 | SIN.LV.SF.GFP | LIVER        | 3 | 135117118 | + | NM_025356    | Ube2d3        | + |
| DMM14 | Cdkn2a <sup>-/-</sup> _C57 | SIN.LV.SF.GFP | LIVER        | 3 | 135119571 | + | NM_025356    | Ube2d3        | + |
| DMM3  | Cdkn2a <sup>-/-</sup> _C57 | SIN.LV.SF.GFP | LIVER        | 3 | 135767139 | - | NM_001033350 | Bank1         | - |
| DMM3  | Cdkn2a <sup>-/-</sup> _C57 | SIN.LV.SF.GFP | LIVER        | 3 | 135917646 | - | NM_001033350 | Bank1         | - |
| DMM3  | Cdkn2a <sup>-/-</sup> _C57 | SIN.LV.SF.GFP | LIVER        | 3 | 135930228 | - | NM_001033350 | Bank1         | - |
| DMM1  | Cdkn2a <sup>-/-</sup> _C57 | SIN.LV.SF.GFP | LIVER        | 3 | 135951021 | - | NM_001033350 | Bank1         | - |
| DMM1  | Cdkn2a <sup>-/-</sup> _C57 | SIN.LV.SF.GFP | LIVER        | 3 | 136524388 | - | NM_008913    | Ppp3ca        | + |
| DMM8  | Cdkn2a <sup>-/-</sup> _C57 | SIN.LV.SF.GFP | LIVER        | 3 | 137586729 | - | NM_019920    | Mapksp1       | + |
| DMM11 | Cdkn2a <sup>-/-</sup> _C57 | SIN.LV.SF.GFP | LIVER        | 3 | 137800837 | + | NM_175389    | Rg9mtd2       | + |
| DMM11 | Cdkn2a <sup>-/-</sup> _C57 | SIN.LV.SF.GFP | LIVER - LIVE | 3 | 137800846 | + | NM_175389    | Rg9mtd2       | + |
| DMM11 | Cdkn2a <sup>-/-</sup> _C57 | SIN.LV.SF.GFP | - LIVER - SI | 3 | 137800967 | - | NM_175389    | Rg9mtd2       | + |
| DMM1  | Cdkn2a <sup>-/-</sup> _C57 | SIN.LV.SF.GFP | LIVER        | 3 | 138127347 | - | NM_175224    | Metap1        | - |
| DMM5  | Cdkn2a <sup>-/-</sup> _C57 | SIN.LV.SF.GFP | LIVER        | 3 | 138907401 | + | NM_198659    | B930007M17Rik | + |
| DMM3  | Cdkn2a <sup>-/-</sup> _C57 | SIN.LV.SF.GFP | LIVER        | 3 | 139897056 | + | NM_198659    | B930007M17Rik | + |
| DMM3  | Cdkn2a <sup>-/-</sup> _C57 | SIN.LV.SF.GFP | LIVER        | 3 | 142049228 | + | NM_022554    | Pdlim5        | - |
| DMM9  | Cdkn2a <sup>-/-</sup> _C57 | SIN.LV.SF.GFP | LIVER        | 3 | 142491091 | + | NM_178654    | Pkn2          | - |
| DMM5  | Cdkn2a <sup>-/-</sup> _C57 | SIN.LV.SF.GFP | LIVER        | 3 | 145252787 | - | NM_001081094 | Znhit6        | + |
| DMM1  | Cdkn2a <sup>-/-</sup> _C57 | SIN.LV.SF.GFP | LIVER        | 3 | 145253077 | + | NM_001081094 | Znhit6        | + |
| DMM5  | Cdkn2a <sup>-/-</sup> _C57 | SIN.LV.SF.GFP | LIVER        | 3 | 146471896 | - | NM_011100    | Prkacb        | - |
| DMM14 | Cdkn2a <sup>-/-</sup> _C57 | SIN.LV.SF.GFP | SPLEEN       | 3 | 147972475 | + | NM_001081298 | Lphn2         | - |
| DMM5  | Cdkn2a <sup>-/-</sup> _C57 | SIN.LV.SF.GFP | LIVER        | 3 | 148018382 | + | NM_001081298 | Lphn2         | - |
| DMM14 | Cdkn2a <sup>-/-</sup> _C57 | SIN.LV.SF.GFP | LIVER        | 3 | 148577033 | - | NM_001081298 | Lphn2         | - |
| DMM1  | Cdkn2a <sup>-/-</sup> _C57 | SIN.LV.SF.GFP | SPLEEN       | 3 | 148715863 | - | NM_001081298 | Lphn2         | - |
| DMM1  | Cdkn2a <sup>-/-</sup> _C57 | SIN.LV.SF.GFP | LIVER        | 3 | 149107813 | + | NM_001081298 | Lphn2         | - |
| DMM1  | Cdkn2a <sup>-/-</sup> _C57 | SIN.LV.SF.GFP | LIVER        | 3 | 150495136 | + | NM_133222    | Elt1          | + |

|       |                            |               |        |   |           |   |              |          |   |
|-------|----------------------------|---------------|--------|---|-----------|---|--------------|----------|---|
| DMM14 | Cdkn2a <sup>-/-</sup> _C57 | SIN.LV.SF.GFP | LIVER  | 3 | 152050085 | - | NM_001076676 | Usp33    | + |
| DMM1  | Cdkn2a <sup>-/-</sup> _C57 | SIN.LV.SF.GFP | LIVER  | 3 | 152406782 | - | NM_025662    | Pigk     | + |
| DMM1  | Cdkn2a <sup>-/-</sup> _C57 | SIN.LV.SF.GFP | LIVER  | 3 | 157615070 | - | NM_001013806 | Ankrd13c | + |
| DMM14 | Cdkn2a <sup>-/-</sup> _C57 | SIN.LV.SF.GFP | LIVER  | 3 | 159580960 | + | NM_026582    | Gpr177   | + |
| DMM14 | Cdkn2a <sup>-/-</sup> _C57 | SIN.LV.SF.GFP | LIVER  | 4 | 3483850   | + | NM_028097    | Tmem68   | - |
| DMM3  | Cdkn2a <sup>-/-</sup> _C57 | SIN.LV.SF.GFP | LIVER  | 4 | 3534085   | - | NM_054089    | Tgs1     | + |
| DMM3  | Cdkn2a <sup>-/-</sup> _C57 | SIN.LV.SF.GFP | LIVER  | 4 | 3538173   | + | NM_054089    | Tgs1     | + |
| DMM1  | Cdkn2a <sup>-/-</sup> _C57 | SIN.LV.SF.GFP | LIVER  | 4 | 3560012   | - | NM_054089    | Tgs1     | + |
| DMM14 | Cdkn2a <sup>-/-</sup> _C57 | SIN.LV.SF.GFP | LIVER  | 4 | 4521756   | - | NM_177730    | Impad1   | - |
| DMM3  | Cdkn2a <sup>-/-</sup> _C57 | SIN.LV.SF.GFP | LIVER  | 4 | 6125208   | + | NM_026534    | Ubxn2b   | + |
| DMM14 | Cdkn2a <sup>-/-</sup> _C57 | SIN.LV.SF.GFP | LIVER  | 4 | 6128643   | + | NM_026534    | Ubxn2b   | + |
| DMM7  | Cdkn2a <sup>-/-</sup> _C57 | SIN.LV.SF.GFP | LIVER  | 4 | 6344481   | - | NM_010945    | Nsmaf    | - |
| DMM14 | Cdkn2a <sup>-/-</sup> _C57 | SIN.LV.SF.GFP | SPLEEN | 4 | 6361264   | + | NM_010945    | Nsmaf    | - |
| DMM1  | Cdkn2a <sup>-/-</sup> _C57 | SIN.LV.SF.GFP | LIVER  | 4 | 9173117   | - | NM_028940    | Rlbp111  | + |
| DMM1  | Cdkn2a <sup>-/-</sup> _C57 | SIN.LV.SF.GFP | LIVER  | 4 | 10901217  | - | NM_175175    | Plekhf2  | - |
| DMM5  | Cdkn2a <sup>-/-</sup> _C57 | SIN.LV.SF.GFP | LIVER  | 4 | 10928773  | + | NM_175175    | Plekhf2  | - |
| DMM14 | Cdkn2a <sup>-/-</sup> _C57 | SIN.LV.SF.GFP | LIVER  | 4 | 12094362  | + | NM_026558    | Fam92a   | - |
| DMM5  | Cdkn2a <sup>-/-</sup> _C57 | SIN.LV.SF.GFP | LIVER  | 4 | 12385872  | + | NM_026558    | Fam92a   | - |
| DMM1  | Cdkn2a <sup>-/-</sup> _C57 | SIN.LV.SF.GFP | LIVER  | 4 | 14799704  | + | NM_028264    | Tmem55a  | + |
| DMM1  | Cdkn2a <sup>-/-</sup> _C57 | SIN.LV.SF.GFP | LIVER  | 4 | 15208875  | - | NM_181401    | Tmem64   | + |
| DMM14 | Cdkn2a <sup>-/-</sup> _C57 | SIN.LV.SF.GFP | LIVER  | 4 | 15210019  | - | NM_181401    | Tmem64   | + |
| DMM3  | Cdkn2a <sup>-/-</sup> _C57 | SIN.LV.SF.GFP | LIVER  | 4 | 15919619  | + | NM_013752    | Nbn      | + |
| DMM1  | Cdkn2a <sup>-/-</sup> _C57 | SIN.LV.SF.GFP | LIVER  | 4 | 15920781  | + | NM_013752    | Nbn      | + |
| DMM14 | Cdkn2a <sup>-/-</sup> _C57 | SIN.LV.SF.GFP | LIVER  | 4 | 16065652  | + | NM_138952    | Ripk2    | - |
| DMM1  | Cdkn2a <sup>-/-</sup> _C57 | SIN.LV.SF.GFP | LIVER  | 4 | 16082350  | - | NM_138952    | Ripk2    | - |
| DMM3  | Cdkn2a <sup>-/-</sup> _C57 | SIN.LV.SF.GFP | LIVER  | 4 | 16098755  | + | NM_138952    | Ripk2    | - |
| DMM3  | Cdkn2a <sup>-/-</sup> _C57 | SIN.LV.SF.GFP | LIVER  | 4 | 16100268  | + | NM_138952    | Ripk2    | - |
| DMM3  | Cdkn2a <sup>-/-</sup> _C57 | SIN.LV.SF.GFP | LIVER  | 4 | 16145912  | + | NM_138952    | Ripk2    | - |
| DMM18 | Cdkn2a <sup>-/-</sup> _C57 | SIN.LV.SF.GFP | SPLEEN | 4 | 16146787  | + | NM_138952    | Ripk2    | - |
| DMM1  | Cdkn2a <sup>-/-</sup> _C57 | SIN.LV.SF.GFP | LIVER  | 4 | 17926444  | + | NM_019724    | Mmp16    | + |
| DMM5  | Cdkn2a <sup>-/-</sup> _C57 | SIN.LV.SF.GFP | LIVER  | 4 | 19582089  | - | NM_177327    | Wwp1     | - |

|       |                            |               |        |   |          |   |              |               |   |
|-------|----------------------------|---------------|--------|---|----------|---|--------------|---------------|---|
| DMM1  | Cdkn2a <sup>-/-</sup> _C57 | SIN.LV.SF.GFP | LIVER  | 4 | 19597775 | - | NM_177327    | Wwp1          | - |
| DMM13 | Cdkn2a <sup>-/-</sup> _C57 | SIN.LV.SF.GFP | SPLEEN | 4 | 19621441 | - | NM_177327    | Wwp1          | - |
| DMM1  | Cdkn2a <sup>-/-</sup> _C57 | SIN.LV.SF.GFP | LIVER  | 4 | 19710223 | - | NM_028746    | Slc7a13       | + |
| DMM5  | Cdkn2a <sup>-/-</sup> _C57 | SIN.LV.SF.GFP | SPLEEN | 4 | 19984180 | - | NM_010281    | Ggh           | + |
| DMM5  | Cdkn2a <sup>-/-</sup> _C57 | SIN.LV.SF.GFP | LIVER  | 4 | 21673517 | + | NM_001122982 | Ccnc          | + |
| DMM3  | Cdkn2a <sup>-/-</sup> _C57 | SIN.LV.SF.GFP | LIVER  | 4 | 21787253 | + | NM_025669    | Sfrs18        | + |
| DMM1  | Cdkn2a <sup>-/-</sup> _C57 | SIN.LV.SF.GFP | LIVER  | 4 | 22333467 | - | NM_172988    | Fbx14         | + |
| DMM18 | Cdkn2a <sup>-/-</sup> _C57 | SIN.LV.SF.GFP | SPLEEN | 4 | 22333831 | + | NM_172988    | Fbx14         | + |
| DMM1  | Cdkn2a <sup>-/-</sup> _C57 | SIN.LV.SF.GFP | LIVER  | 4 | 24425332 | - | NM_199467    | F730047E07Rik | + |
| DMM3  | Cdkn2a <sup>-/-</sup> _C57 | SIN.LV.SF.GFP | LIVER  | 4 | 24511469 | + | NM_199467    | F730047E07Rik | + |
| DMM3  | Cdkn2a <sup>-/-</sup> _C57 | SIN.LV.SF.GFP | LIVER  | 4 | 28893134 | - | NM_010141    | Epha7         | + |
| DMM3  | Cdkn2a <sup>-/-</sup> _C57 | SIN.LV.SF.GFP | LIVER  | 4 | 29078197 | + | NM_010141    | Epha7         | + |
| DMM5  | Cdkn2a <sup>-/-</sup> _C57 | SIN.LV.SF.GFP | LIVER  | 4 | 30883363 | - | NM_172688    | Map3k7        | + |
| DMM1  | Cdkn2a <sup>-/-</sup> _C57 | SIN.LV.SF.GFP | LIVER  | 4 | 32190314 | - | NM_172688    | Map3k7        | + |
| DMM1  | Cdkn2a <sup>-/-</sup> _C57 | SIN.LV.SF.GFP | LIVER  | 4 | 33474819 | - | NM_011884    | Rngtt         | + |
| DMM1  | Cdkn2a <sup>-/-</sup> _C57 | SIN.LV.SF.GFP | LIVER  | 4 | 34169310 | - | NM_026293    | Spaca1        | - |
| DMM18 | Cdkn2a <sup>-/-</sup> _C57 | SIN.LV.SF.GFP | SPLEEN | 4 | 34331405 | + | NM_001007589 | Akirin2       | + |
| DMM18 | Cdkn2a <sup>-/-</sup> _C57 | SIN.LV.SF.GFP | SPLEEN | 4 | 34331493 | - | NM_001007589 | Akirin2       | + |
| DMM7  | Cdkn2a <sup>-/-</sup> _C57 | SIN.LV.SF.GFP | SPLEEN | 4 | 34446723 | - | NM_001007589 | Akirin2       | + |
| DMM5  | Cdkn2a <sup>-/-</sup> _C57 | SIN.LV.SF.GFP | LIVER  | 4 | 34624211 | + | NM_011895    | Slc35a1       | - |
| DMM5  | Cdkn2a <sup>-/-</sup> _C57 | SIN.LV.SF.GFP | LIVER  | 4 | 35896153 | - | NM_175516    | Lingo2        | - |
| DMM1  | Cdkn2a <sup>-/-</sup> _C57 | SIN.LV.SF.GFP | LIVER  | 4 | 36006920 | - | NM_175516    | Lingo2        | - |
| DMM3  | Cdkn2a <sup>-/-</sup> _C57 | SIN.LV.SF.GFP | LIVER  | 4 | 36007467 | + | NM_175516    | Lingo2        | - |
| DMM7  | Cdkn2a <sup>-/-</sup> _C57 | SIN.LV.SF.GFP | LIVER  | 4 | 38229752 | + | NM_001081095 | 1700009N14Rik | + |
| DMM1  | Cdkn2a <sup>-/-</sup> _C57 | SIN.LV.SF.GFP | LIVER  | 4 | 40110776 | + | NM_007386    | Aco1          | + |
| DMM5  | Cdkn2a <sup>-/-</sup> _C57 | SIN.LV.SF.GFP | LIVER  | 4 | 44193179 | + | NM_001038993 | Rnf38         | - |
| DMM3  | Cdkn2a <sup>-/-</sup> _C57 | SIN.LV.SF.GFP | LIVER  | 4 | 44783021 | + | NM_138590    | Zcchc7        | + |
| DMM1  | Cdkn2a <sup>-/-</sup> _C57 | SIN.LV.SF.GFP | LIVER  | 4 | 44798087 | - | NM_138590    | Zcchc7        | + |
| DMM9  | Cdkn2a <sup>-/-</sup> _C57 | SIN.LV.SF.GFP | SPLEEN | 4 | 44812987 | - | NM_138590    | Zcchc7        | + |
| DMM7  | Cdkn2a <sup>-/-</sup> _C57 | SIN.LV.SF.GFP | LIVER  | 4 | 46473353 | + | NM_130889    | Anp32b        | + |
| DMM5  | Cdkn2a <sup>-/-</sup> _C57 | SIN.LV.SF.GFP | LIVER  | 4 | 47117517 | + | NM_172693    | Galnt12       | + |

|       |                            |               |                |   |          |   |              |               |   |
|-------|----------------------------|---------------|----------------|---|----------|---|--------------|---------------|---|
| DMM1  | Cdkn2a <sup>-/-</sup> _C57 | SIN.LV.SF.GFP | LIVER          | 4 | 53331589 | + | NM_001033454 | AI427809      | - |
| DMM1  | Cdkn2a <sup>-/-</sup> _C57 | SIN.LV.SF.GFP | LIVER          | 4 | 53491783 | + | NM_001159633 | Slc44a1       | + |
| DMM5  | Cdkn2a <sup>-/-</sup> _C57 | SIN.LV.SF.GFP | LIVER          | 4 | 54451906 | + | NM_172867    | Zfp462        | + |
| DMM1  | Cdkn2a <sup>-/-</sup> _C57 | SIN.LV.SF.GFP | LIVER          | 4 | 56774695 | + | NM_026079    | Ikbkap        | - |
| DMM1  | Cdkn2a <sup>-/-</sup> _C57 | SIN.LV.SF.GFP | LIVER          | 4 | 57768221 | - | NM_172868    | Palm2         | + |
| DMM5  | Cdkn2a <sup>-/-</sup> _C57 | SIN.LV.SF.GFP | LIVER          | 4 | 58532810 | + | NM_172989    | Lpar1         | - |
| DMM1  | Cdkn2a <sup>-/-</sup> _C57 | SIN.LV.SF.GFP | LIVER          | 4 | 58851358 | + | NM_172381    | AI314180      | - |
| DMM14 | Cdkn2a <sup>-/-</sup> _C57 | SIN.LV.SF.GFP | LIVER          | 4 | 59530453 | - | NM_144904    | Rod1          | - |
| DMM1  | Cdkn2a <sup>-/-</sup> _C57 | SIN.LV.SF.GFP | LIVER          | 4 | 59533109 | - | NM_144904    | Rod1          | - |
| DMM18 | Cdkn2a <sup>-/-</sup> _C57 | SIN.LV.SF.GFP | SPLEEN         | 4 | 61935387 | - | NM_025286    | Slc31a2       | + |
| DMM7  | Cdkn2a <sup>-/-</sup> _C57 | SIN.LV.SF.GFP | LIVER - SPLEEN | 4 | 62355926 | + | NM_134257    | Rgs3          | + |
| DMM14 | Cdkn2a <sup>-/-</sup> _C57 | SIN.LV.SF.GFP | LIVER          | 4 | 66491536 | + | NM_021297    | Tlr4          | + |
| DMM1  | Cdkn2a <sup>-/-</sup> _C57 | SIN.LV.SF.GFP | LIVER          | 4 | 66500516 | - | NM_021297    | Tlr4          | + |
| DMM14 | Cdkn2a <sup>-/-</sup> _C57 | SIN.LV.SF.GFP | LIVER          | 4 | 70202639 | + | NM_172694    | Megf9         | - |
| DMM1  | Cdkn2a <sup>-/-</sup> _C57 | SIN.LV.SF.GFP | LIVER          | 4 | 70840144 | + | NM_172694    | Megf9         | - |
| DMM18 | Cdkn2a <sup>-/-</sup> _C57 | SIN.LV.SF.GFP | SPLEEN         | 4 | 71144397 | + | NM_011599    | Tle1          | - |
| DMM18 | Cdkn2a <sup>-/-</sup> _C57 | SIN.LV.SF.GFP | SPLEEN         | 4 | 73964444 | - | NM_144787    | Kdm4c         | + |
| DMM9  | Cdkn2a <sup>-/-</sup> _C57 | SIN.LV.SF.GFP | LIVER          | 4 | 74024842 | - | NM_144787    | Kdm4c         | + |
| DMM5  | Cdkn2a <sup>-/-</sup> _C57 | SIN.LV.SF.GFP | SPLEEN         | 4 | 74036317 | + | NM_144787    | Kdm4c         | + |
| DMM3  | Cdkn2a <sup>-/-</sup> _C57 | SIN.LV.SF.GFP | LIVER          | 4 | 74939500 | + | NM_025849    | 3110001D03Rik | - |
| DMM6  | Cdkn2a <sup>-/-</sup> _C57 | SIN.LV.SF.GFP | SPLEEN         | 4 | 75045701 | + | NM_025849    | 3110001D03Rik | - |
| DMM7  | Cdkn2a <sup>-/-</sup> _C57 | SIN.LV.SF.GFP | LIVER          | 4 | 75814409 | + | NM_011211    | Ptprd         | - |
| DMM5  | Cdkn2a <sup>-/-</sup> _C57 | SIN.LV.SF.GFP | LIVER          | 4 | 76217897 | - | NM_011211    | Ptprd         | - |
| DMM14 | Cdkn2a <sup>-/-</sup> _C57 | SIN.LV.SF.GFP | SPLEEN         | 4 | 77040559 | + | NM_011211    | Ptprd         | - |
| DMM5  | Cdkn2a <sup>-/-</sup> _C57 | SIN.LV.SF.GFP | LIVER          | 4 | 79974297 | + | NM_031202    | Tyrp1         | + |
| DMM1  | Cdkn2a <sup>-/-</sup> _C57 | SIN.LV.SF.GFP | LIVER          | 4 | 80927478 | + | NM_010820    | Mpdz          | - |
| DMM3  | Cdkn2a <sup>-/-</sup> _C57 | SIN.LV.SF.GFP | LIVER          | 4 | 81378602 | - | NM_010820    | Mpdz          | - |
| DMM5  | Cdkn2a <sup>-/-</sup> _C57 | SIN.LV.SF.GFP | LIVER          | 4 | 82490287 | + | NM_026647    | Zdhhc21       | - |
| DMM8  | Cdkn2a <sup>-/-</sup> _C57 | SIN.LV.SF.GFP | LIVER - SPLEEN | 4 | 82497355 | + | NM_026647    | Zdhhc21       | - |
| DMM1  | Cdkn2a <sup>-/-</sup> _C57 | SIN.LV.SF.GFP | SPLEEN         | 4 | 82566729 | + | NM_177863    | Frem1         | - |
| DMM1  | Cdkn2a <sup>-/-</sup> _C57 | SIN.LV.SF.GFP | SPLEEN         | 4 | 82896096 | + | NM_027238    | Ttc39b        | - |

|       |                            |               |        |   |           |   |              |          |   |
|-------|----------------------------|---------------|--------|---|-----------|---|--------------|----------|---|
| DMM1  | Cdkn2a <sup>-/-</sup> _C57 | SIN.LV.SF.GFP | LIVER  | 4 | 86426174  | - | NM_001081014 | Dennd4c  | + |
| DMM14 | Cdkn2a <sup>-/-</sup> _C57 | SIN.LV.SF.GFP | LIVER  | 4 | 87951694  | + | NM_001081184 | BC057079 | + |
| DMM9  | Cdkn2a <sup>-/-</sup> _C57 | SIN.LV.SF.GFP | LIVER  | 4 | 88005862  | + | NM_001081184 | BC057079 | + |
| DMM9  | Cdkn2a <sup>-/-</sup> _C57 | SIN.LV.SF.GFP | LIVER  | 4 | 88006240  | - | NM_001081184 | BC057079 | + |
| DMM3  | Cdkn2a <sup>-/-</sup> _C57 | SIN.LV.SF.GFP | LIVER  | 4 | 88723916  | + | NM_024433    | Mtap     | + |
| DMM14 | Cdkn2a <sup>-/-</sup> _C57 | SIN.LV.SF.GFP | LIVER  | 4 | 94354028  | - | NM_026319    | Ift74    | + |
| DMM1  | Cdkn2a <sup>-/-</sup> _C57 | SIN.LV.SF.GFP | SPLEEN | 4 | 94619525  | + | NM_177239    | Mysm1    | - |
| DMM7  | Cdkn2a <sup>-/-</sup> _C57 | SIN.LV.SF.GFP | LIVER  | 4 | 95127215  | - | NM_001113412 | Fggy     | + |
| DMM1  | Cdkn2a <sup>-/-</sup> _C57 | SIN.LV.SF.GFP | LIVER  | 4 | 97781667  | - | NM_001122952 | Nfia     | + |
| DMM3  | Cdkn2a <sup>-/-</sup> _C57 | SIN.LV.SF.GFP | LIVER  | 4 | 98751497  | - | NM_026082    | Dock7    | - |
| DMM5  | Cdkn2a <sup>-/-</sup> _C57 | SIN.LV.SF.GFP | LIVER  | 4 | 102995359 | - | NM_025909    | Oma1     | + |
| DMM1  | Cdkn2a <sup>-/-</sup> _C57 | SIN.LV.SF.GFP | LIVER  | 4 | 103003972 | + | NM_025909    | Oma1     | + |
| DMM3  | Cdkn2a <sup>-/-</sup> _C57 | SIN.LV.SF.GFP | LIVER  | 4 | 104749608 | - | NM_178143    | Prkaa2   | - |
| DMM9  | Cdkn2a <sup>-/-</sup> _C57 | SIN.LV.SF.GFP | SPLEEN | 4 | 105966176 | - | NM_153565    | Pcsk9    | - |
| DMM5  | Cdkn2a <sup>-/-</sup> _C57 | SIN.LV.SF.GFP | SPLEEN | 4 | 106103203 | - | NM_153565    | Pcsk9    | - |
| DMM3  | Cdkn2a <sup>-/-</sup> _C57 | SIN.LV.SF.GFP | LIVER  | 4 | 109539760 | - | NM_007983    | Faf1     | + |
| DMM5  | Cdkn2a <sup>-/-</sup> _C57 | SIN.LV.SF.GFP | LIVER  | 4 | 111413992 | - | NM_026470    | Spata6   | + |
| DMM1  | Cdkn2a <sup>-/-</sup> _C57 | SIN.LV.SF.GFP | LIVER  | 4 | 112982240 | + | NM_001103199 | Skint6   | - |
| DMM1  | Cdkn2a <sup>-/-</sup> _C57 | SIN.LV.SF.GFP | LIVER  | 4 | 116831376 | - | NM_134471    | Kif2c    | - |
| DMM8  | Cdkn2a <sup>-/-</sup> _C57 | SIN.LV.SF.GFP | LIVER  | 4 | 117227137 | - | NM_080469    | Eri3     | + |
| DMM3  | Cdkn2a <sup>-/-</sup> _C57 | SIN.LV.SF.GFP | LIVER  | 4 | 120101374 | + | NM_001159630 | Scmh1    | + |
| DMM3  | Cdkn2a <sup>-/-</sup> _C57 | SIN.LV.SF.GFP | LIVER  | 4 | 120181516 | - | NM_001159630 | Scmh1    | + |
| DMM1  | Cdkn2a <sup>-/-</sup> _C57 | SIN.LV.SF.GFP | LIVER  | 4 | 123121082 | + | NM_009600    | Macf1    | - |
| DMM1  | Cdkn2a <sup>-/-</sup> _C57 | SIN.LV.SF.GFP | LIVER  | 4 | 126098690 | + | NM_153402    | Eif2c3   | - |
| DMM14 | Cdkn2a <sup>-/-</sup> _C57 | SIN.LV.SF.GFP | LIVER  | 4 | 126640924 | + | NM_001114399 | Zmym4    | - |
| DMM8  | Cdkn2a <sup>-/-</sup> _C57 | SIN.LV.SF.GFP | SPLEEN | 4 | 130365275 | - | NM_011520    | Sdc3     | + |
| DMM14 | Cdkn2a <sup>-/-</sup> _C57 | SIN.LV.SF.GFP | LIVER  | 4 | 131796507 | - | NM_001122992 | Gmeb1    | - |
| DMM7  | Cdkn2a <sup>-/-</sup> _C57 | SIN.LV.SF.GFP | LIVER  | 4 | 133975754 | + | NM_133880    | Pafah2   | + |
| DMM14 | Cdkn2a <sup>-/-</sup> _C57 | SIN.LV.SF.GFP | LIVER  | 4 | 134080956 | - | NM_029759    | Fam54b   | - |
| DMM5  | Cdkn2a <sup>-/-</sup> _C57 | SIN.LV.SF.GFP | LIVER  | 4 | 141505990 | - | NM_177868    | Fhad1    | - |
| DMM5  | Cdkn2a <sup>-/-</sup> _C57 | SIN.LV.SF.GFP | LIVER  | 4 | 142732969 | - | NM_001081355 | Prdm2    | - |

|       |                            |               |        |   |           |   |              |               |   |
|-------|----------------------------|---------------|--------|---|-----------|---|--------------|---------------|---|
| DMM14 | Cdkn2a <sup>-/-</sup> _C57 | SIN.LV.SF.GFP | LIVER  | 4 | 142750297 | - | NM_001081355 | Prdm2         | - |
| DMM3  | Cdkn2a <sup>-/-</sup> _C57 | SIN.LV.SF.GFP | LIVER  | 4 | 142769570 | + | NM_001081355 | Prdm2         | - |
| DMM3  | Cdkn2a <sup>-/-</sup> _C57 | SIN.LV.SF.GFP | LIVER  | 4 | 144692853 | - | NM_001128198 | Vps13d        | - |
| DMM5  | Cdkn2a <sup>-/-</sup> _C57 | SIN.LV.SF.GFP | LIVER  | 4 | 144728925 | - | NM_001128198 | Vps13d        | - |
| DMM1  | Cdkn2a <sup>-/-</sup> _C57 | SIN.LV.SF.GFP | LIVER  | 4 | 149894689 | + | NM_001085492 | Rere          | + |
| DMM5  | Cdkn2a <sup>-/-</sup> _C57 | SIN.LV.SF.GFP | LIVER  | 4 | 151199675 | + | NM_001081557 | Camta1        | - |
| DMM9  | Cdkn2a <sup>-/-</sup> _C57 | SIN.LV.SF.GFP | LIVER  | 4 | 151777017 | - | NM_010598    | Kcnab2        | - |
| DMM1  | Cdkn2a <sup>-/-</sup> _C57 | SIN.LV.SF.GFP | LIVER  | 5 | 3809188   | - | NM_030675    | Krit1         | + |
| DMM1  | Cdkn2a <sup>-/-</sup> _C57 | SIN.LV.SF.GFP | SPLEEN | 5 | 4816430   | - | NM_011074    | Pftk1         | - |
| DMM9  | Cdkn2a <sup>-/-</sup> _C57 | SIN.LV.SF.GFP | SPLEEN | 5 | 4878219   | - | NM_011074    | Pftk1         | - |
| DMM2  | Cdkn2a <sup>-/-</sup> _C57 | SIN.LV.SF.GFP | LIVER  | 5 | 5514104   | + | NM_022890    | Cldn12        | - |
| DMM14 | Cdkn2a <sup>-/-</sup> _C57 | SIN.LV.SF.GFP | LIVER  | 5 | 8427995   | - | NM_178766    | Slc25a40      | + |
| DMM1  | Cdkn2a <sup>-/-</sup> _C57 | SIN.LV.SF.GFP | SPLEEN | 5 | 8683277   | - | NM_011076    | Abcb1a        | + |
| DMM3  | Cdkn2a <sup>-/-</sup> _C57 | SIN.LV.SF.GFP | LIVER  | 5 | 8960099   | + | NM_008830    | Abcb4         | + |
| DMM5  | Cdkn2a <sup>-/-</sup> _C57 | SIN.LV.SF.GFP | LIVER  | 5 | 9132292   | - | NM_001110327 | Dmtf1         | - |
| DMM14 | Cdkn2a <sup>-/-</sup> _C57 | SIN.LV.SF.GFP | LIVER  | 5 | 9228151   | + | NM_172706    | 9330182L06Rik | + |
| DMM1  | Cdkn2a <sup>-/-</sup> _C57 | SIN.LV.SF.GFP | LIVER  | 5 | 10799997  | + | NR_003596    | Gm6455        | + |
| DMM1  | Cdkn2a <sup>-/-</sup> _C57 | SIN.LV.SF.GFP | LIVER  | 5 | 12045658  | - | NM_028882    | Sema3d        | + |
| DMM1  | Cdkn2a <sup>-/-</sup> _C57 | SIN.LV.SF.GFP | LIVER  | 5 | 12046640  | - | NM_028882    | Sema3d        | + |
| DMM4  | Cdkn2a <sup>-/-</sup> _C57 | SIN.LV.SF.GFP | SPLEEN | 5 | 15554264  | - | NM_001110843 | Cacna2d1      | + |
| DMM12 | Cdkn2a <sup>-/-</sup> _C57 | SIN.LV.SF.GFP | SPLEEN | 5 | 16043356  | + | NM_010427    | Hgf           | + |
| DMM5  | Cdkn2a <sup>-/-</sup> _C57 | SIN.LV.SF.GFP | LIVER  | 5 | 16056220  | - | NM_010427    | Hgf           | + |
| DMM14 | Cdkn2a <sup>-/-</sup> _C57 | SIN.LV.SF.GFP | LIVER  | 5 | 16105732  | - | NM_010427    | Hgf           | + |
| DMM14 | Cdkn2a <sup>-/-</sup> _C57 | SIN.LV.SF.GFP | LIVER  | 5 | 16327157  | - | NM_010427    | Hgf           | + |
| DMM8  | Cdkn2a <sup>-/-</sup> _C57 | SIN.LV.SF.GFP | LIVER  | 5 | 20949687  | + | NM_177869    | A1847670      | + |
| DMM3  | Cdkn2a <sup>-/-</sup> _C57 | SIN.LV.SF.GFP | LIVER  | 5 | 22022816  | - | NM_011959    | Orc5l         | - |
| DMM14 | Cdkn2a <sup>-/-</sup> _C57 | SIN.LV.SF.GFP | LIVER  | 5 | 23101340  | + | NM_009274    | Srpk2         | - |
| DMM14 | Cdkn2a <sup>-/-</sup> _C57 | SIN.LV.SF.GFP | LIVER  | 5 | 28647090  | + | NM_028234    | Prr8          | + |
| DMM13 | Cdkn2a <sup>-/-</sup> _C57 | SIN.LV.SF.GFP | LIVER  | 5 | 31212274  | + | NM_024460    | 2310016E02Rik | - |
| DMM1  | Cdkn2a <sup>-/-</sup> _C57 | SIN.LV.SF.GFP | LIVER  | 5 | 34225733  | + | NM_001081102 | Whsc1         | + |
| DMM1  | Cdkn2a <sup>-/-</sup> _C57 | SIN.LV.SF.GFP | LIVER  | 5 | 38435039  | + | NM_026959    | Stx18         | + |

|       |                            |               |                |   |          |   |              |          |   |
|-------|----------------------------|---------------|----------------|---|----------|---|--------------|----------|---|
| DMM5  | Cdkn2a <sup>-/-</sup> _C57 | SIN.LV.SF.GFP | VER - SPLEEN   | 5 | 41577439 | - | NM_027295    | Rab28    | - |
| DMM5  | Cdkn2a <sup>-/-</sup> _C57 | SIN.LV.SF.GFP | LIVER          | 5 | 41914128 | + | NM_027295    | Rab28    | - |
| DMM3  | Cdkn2a <sup>-/-</sup> _C57 | SIN.LV.SF.GFP | LIVER          | 5 | 42042422 | + | NM_027295    | Rab28    | - |
| DMM1  | Cdkn2a <sup>-/-</sup> _C57 | SIN.LV.SF.GFP | LIVER          | 5 | 43716450 | + | NM_175937    | Cpeb2    | + |
| DMM9  | Cdkn2a <sup>-/-</sup> _C57 | SIN.LV.SF.GFP | SPLEEN         | 5 | 43782210 | + | NM_175937    | Cpeb2    | + |
| DMM9  | Cdkn2a <sup>-/-</sup> _C57 | SIN.LV.SF.GFP | LIVER          | 5 | 45340984 | - | NM_001077398 | Ldb2     | - |
| DMM1  | Cdkn2a <sup>-/-</sup> _C57 | SIN.LV.SF.GFP | LIVER          | 5 | 46116537 | - | NM_178142    | Lcor1    | - |
| DMM3  | Cdkn2a <sup>-/-</sup> _C57 | SIN.LV.SF.GFP | LIVER          | 5 | 46124099 | - | NM_172153    | Lcor1    | - |
| DMM14 | Cdkn2a <sup>-/-</sup> _C57 | SIN.LV.SF.GFP | LIVER          | 5 | 46164124 | + | NM_172153    | Lcor1    | - |
| DMM3  | Cdkn2a <sup>-/-</sup> _C57 | SIN.LV.SF.GFP | LIVER          | 5 | 46171179 | - | NM_172153    | Lcor1    | - |
| DMM1  | Cdkn2a <sup>-/-</sup> _C57 | SIN.LV.SF.GFP | LIVER          | 5 | 47885791 | - | NM_178804    | Slit2    | + |
| DMM8  | Cdkn2a <sup>-/-</sup> _C57 | SIN.LV.SF.GFP | VER - SPLEEN   | 5 | 48792354 | - | NM_030265    | Kcnip4   | - |
| DMM5  | Cdkn2a <sup>-/-</sup> _C57 | SIN.LV.SF.GFP | LIVER          | 5 | 50778309 | + | NM_008904    | Ppargc1a | - |
| DMM5  | Cdkn2a <sup>-/-</sup> _C57 | SIN.LV.SF.GFP | LIVER          | 5 | 52575195 | + | NM_001042620 | Dhx15    | - |
| DMM5  | Cdkn2a <sup>-/-</sup> _C57 | SIN.LV.SF.GFP | LIVER          | 5 | 52575271 | - | NM_001042620 | Dhx15    | - |
| DMM3  | Cdkn2a <sup>-/-</sup> _C57 | SIN.LV.SF.GFP | LIVER          | 5 | 54213037 | - | NM_144517    | Tbc1d19  | + |
| DMM5  | Cdkn2a <sup>-/-</sup> _C57 | SIN.LV.SF.GFP | LIVER          | 5 | 54634305 | - | NM_001081103 | Stim2    | + |
| DMM2  | Cdkn2a <sup>-/-</sup> _C57 | SIN.LV.SF.GFP | LIVER          | 5 | 60231137 | - | NM_001122758 | Pcdh7    | + |
| DMM1  | Cdkn2a <sup>-/-</sup> _C57 | SIN.LV.SF.GFP | LIVER          | 5 | 63067022 | - | NM_178407    | Arap2    | - |
| DMM1  | Cdkn2a <sup>-/-</sup> _C57 | SIN.LV.SF.GFP | LIVER          | 5 | 63125839 | + | NM_178407    | Arap2    | - |
| DMM7  | Cdkn2a <sup>-/-</sup> _C57 | SIN.LV.SF.GFP | LIVER          | 5 | 63126877 | + | NM_178407    | Arap2    | - |
| DMM5  | Cdkn2a <sup>-/-</sup> _C57 | SIN.LV.SF.GFP | LIVER          | 5 | 63130415 | - | NM_178407    | Arap2    | - |
| DMM5  | Cdkn2a <sup>-/-</sup> _C57 | SIN.LV.SF.GFP | LIVER          | 5 | 63171024 | - | NM_178407    | Arap2    | - |
| DMM1  | Cdkn2a <sup>-/-</sup> _C57 | SIN.LV.SF.GFP | LIVER          | 5 | 64355101 | - | NM_145923    | Rell1    | - |
| DMM1  | Cdkn2a <sup>-/-</sup> _C57 | SIN.LV.SF.GFP | LIVER          | 5 | 66019681 | + | NM_001081321 | Pds5a    | - |
| DMM9  | Cdkn2a <sup>-/-</sup> _C57 | SIN.LV.SF.GFP | SPLEEN         | 5 | 66688943 | - | NM_027602    | Nsun7    | + |
| DMM8  | Cdkn2a <sup>-/-</sup> _C57 | SIN.LV.SF.GFP | SPLEEN         | 5 | 68016730 | - | NM_001038999 | Atp8a1   | - |
| DMM5  | Cdkn2a <sup>-/-</sup> _C57 | SIN.LV.SF.GFP | arcoma - LIVER | 5 | 68299683 | - | NM_001038999 | Atp8a1   | - |
| DMM14 | Cdkn2a <sup>-/-</sup> _C57 | SIN.LV.SF.GFP | LIVER          | 5 | 69956967 | + | NM_172711    | Guf1     | + |
| DMM1  | Cdkn2a <sup>-/-</sup> _C57 | SIN.LV.SF.GFP | LIVER          | 5 | 73199533 | - | NM_001113460 | Tec      | - |
| DMM14 | Cdkn2a <sup>-/-</sup> _C57 | SIN.LV.SF.GFP | LIVER          | 5 | 73413788 | + | NM_028194    | Fryl     | - |

|       |                            |               |        |   |           |   |              |               |   |
|-------|----------------------------|---------------|--------|---|-----------|---|--------------|---------------|---|
| DMM3  | Cdkn2a <sup>-/-</sup> _C57 | SIN.LV.SF.GFP | SPLEEN | 5 | 74783524  | - | NM_001114660 | Scfd2         | - |
| DMM5  | Cdkn2a <sup>-/-</sup> _C57 | SIN.LV.SF.GFP | LIVER  | 5 | 75213689  | - | NM_001159577 | Lnx1          | - |
| DMM1  | Cdkn2a <sup>-/-</sup> _C57 | SIN.LV.SF.GFP | LIVER  | 5 | 76379129  | + | NM_010612    | Kdr           | - |
| DMM3  | Cdkn2a <sup>-/-</sup> _C57 | SIN.LV.SF.GFP | LIVER  | 5 | 77399655  | - | NM_025939    | Paics         | + |
| DMM5  | Cdkn2a <sup>-/-</sup> _C57 | SIN.LV.SF.GFP | LIVER  | 5 | 82039064  | - | NM_198702    | Lphn3         | + |
| DMM8  | Cdkn2a <sup>-/-</sup> _C57 | SIN.LV.SF.GFP | LIVER  | 5 | 84602951  | + | NM_007937    | Epha5         | - |
| DMM14 | Cdkn2a <sup>-/-</sup> _C57 | SIN.LV.SF.GFP | LIVER  | 5 | 86557662  | - | NM_172712    | Uba6          | - |
| DMM11 | Cdkn2a <sup>-/-</sup> _C57 | SIN.LV.SF.GFP | SPLEEN | 5 | 86714783  | + | NM_001030297 | Tmprss11c     | - |
| DMM1  | Cdkn2a <sup>-/-</sup> _C57 | SIN.LV.SF.GFP | LIVER  | 5 | 87258762  | - | NM_177680    | Ythdc1        | + |
| DMM7  | Cdkn2a <sup>-/-</sup> _C57 | SIN.LV.SF.GFP | SPLEEN | 5 | 89184727  | - | NM_026735    | Mobk11a       | + |
| DMM3  | Cdkn2a <sup>-/-</sup> _C57 | SIN.LV.SF.GFP | LIVER  | 5 | 90709449  | + | NM_030886    | Ankrd17       | - |
| DMM1  | Cdkn2a <sup>-/-</sup> _C57 | SIN.LV.SF.GFP | LIVER  | 5 | 90762971  | + | NM_030886    | Ankrd17       | - |
| DMM5  | Cdkn2a <sup>-/-</sup> _C57 | SIN.LV.SF.GFP | LIVER  | 5 | 92150478  | + | NM_001111273 | Gm7828        | - |
| DMM1  | Cdkn2a <sup>-/-</sup> _C57 | SIN.LV.SF.GFP | SPLEEN | 5 | 92396087  | - | NM_026557    | Rchy1         | - |
| DMM3  | Cdkn2a <sup>-/-</sup> _C57 | SIN.LV.SF.GFP | LIVER  | 5 | 92487003  | + | NM_001080795 | G3bp2         | - |
| DMM3  | Cdkn2a <sup>-/-</sup> _C57 | SIN.LV.SF.GFP | LIVER  | 5 | 92550146  | + | NM_019490    | Uso1          | + |
| DMM14 | Cdkn2a <sup>-/-</sup> _C57 | SIN.LV.SF.GFP | LIVER  | 5 | 92763842  | + | NM_181728    | Art3          | + |
| DMM1  | Cdkn2a <sup>-/-</sup> _C57 | SIN.LV.SF.GFP | LIVER  | 5 | 92888707  | + | NM_007644    | Scarb2        | - |
| DMM1  | Cdkn2a <sup>-/-</sup> _C57 | SIN.LV.SF.GFP | SPLEEN | 5 | 93052020  | + | NM_177230    | Ccdc158       | - |
| DMM1  | Cdkn2a <sup>-/-</sup> _C57 | SIN.LV.SF.GFP | SPLEEN | 5 | 93615870  | + | NM_017367    | Ccni          | - |
| DMM14 | Cdkn2a <sup>-/-</sup> _C57 | SIN.LV.SF.GFP | LIVER  | 5 | 96521815  | - | NM_144910    | Cnot6l        | - |
| DMM7  | Cdkn2a <sup>-/-</sup> _C57 | SIN.LV.SF.GFP | SPLEEN | 5 | 98362350  | + | NM_133738    | Antxr2        | - |
| DMM3  | Cdkn2a <sup>-/-</sup> _C57 | SIN.LV.SF.GFP | LIVER  | 5 | 98395407  | - | NM_133738    | Antxr2        | - |
| DMM1  | Cdkn2a <sup>-/-</sup> _C57 | SIN.LV.SF.GFP | LIVER  | 5 | 98434723  | + | NM_133738    | Antxr2        | - |
| DMM7  | Cdkn2a <sup>-/-</sup> _C57 | SIN.LV.SF.GFP | LIVER  | 5 | 99000588  | - | NM_001024614 | 1700007G11Rik | + |
| DMM9  | Cdkn2a <sup>-/-</sup> _C57 | SIN.LV.SF.GFP | SPLEEN | 5 | 99783748  | + | NM_145839    | Rasgef1b      | - |
| DMM1  | Cdkn2a <sup>-/-</sup> _C57 | SIN.LV.SF.GFP | SPLEEN | 5 | 100914113 | + | NM_001115010 | Lin54         | - |
| DMM1  | Cdkn2a <sup>-/-</sup> _C57 | SIN.LV.SF.GFP | LIVER  | 5 | 104211587 | - | NM_001080798 | Aff1          | + |
| DMM14 | Cdkn2a <sup>-/-</sup> _C57 | SIN.LV.SF.GFP | SPLEEN | 5 | 106329827 | - | NM_018759    | Zfp326        | + |
| DMM1  | Cdkn2a <sup>-/-</sup> _C57 | SIN.LV.SF.GFP | LIVER  | 5 | 108197144 | + | NM_007964    | Evi5          | - |
| DMM1  | Cdkn2a <sup>-/-</sup> _C57 | SIN.LV.SF.GFP | LIVER  | 5 | 108234230 | + | NM_007964    | Evi5          | - |



|       |                            |               |        |   |           |   |              |               |   |
|-------|----------------------------|---------------|--------|---|-----------|---|--------------|---------------|---|
| DMM1  | Cdkn2a <sup>-/-</sup> _C57 | SIN.LV.SF.GFP | LIVER  | 5 | 108598865 | - | NM_028481    | Ccdc18        | + |
| DMM8  | Cdkn2a <sup>-/-</sup> _C57 | SIN.LV.SF.GFP | LIVER  | 5 | 108649913 | - | NM_028481    | Ccdc18        | + |
| DMM1  | Cdkn2a <sup>-/-</sup> _C57 | SIN.LV.SF.GFP | SPLEEN | 5 | 110297489 | + | NM_207279    | Plexd1        | + |
| DMM1  | Cdkn2a <sup>-/-</sup> _C57 | SIN.LV.SF.GFP | LIVER  | 5 | 110302639 | + | NM_207279    | Plexd1        | + |
| DMM1  | Cdkn2a <sup>-/-</sup> _C57 | SIN.LV.SF.GFP | LIVER  | 5 | 110817961 | + | NM_001142642 | 2410025L10Rik | - |
| DMM14 | Cdkn2a <sup>-/-</sup> _C57 | SIN.LV.SF.GFP | SPLEEN | 5 | 111194589 | + | NM_029337    | Ep400         | - |
| DMM11 | Cdkn2a <sup>-/-</sup> _C57 | SIN.LV.SF.GFP | LIVER  | 5 | 115372566 | + | NM_145209    | Oasl1         | + |
| DMM1  | Cdkn2a <sup>-/-</sup> _C57 | SIN.LV.SF.GFP | LIVER  | 5 | 116384089 | + | NM_007708    | Cit           | + |
| DMM8  | Cdkn2a <sup>-/-</sup> _C57 | SIN.LV.SF.GFP | LIVER  | 5 | 120795765 | - | NM_008499    | Lhx5          | + |
| DMM14 | Cdkn2a <sup>-/-</sup> _C57 | SIN.LV.SF.GFP | LIVER  | 5 | 121855804 | - | NM_172722    | C330023M02Rik | + |
| DMM18 | Cdkn2a <sup>-/-</sup> _C57 | SIN.LV.SF.GFP | SPLEEN | 5 | 122182037 | - | NM_009125    | Atxn2         | + |
| DMM1  | Cdkn2a <sup>-/-</sup> _C57 | SIN.LV.SF.GFP | LIVER  | 5 | 134560748 | - | NM_030719    | Gatsl2        | + |
| DMM5  | Cdkn2a <sup>-/-</sup> _C57 | SIN.LV.SF.GFP | LIVER  | 5 | 135919396 | + | NM_146001    | Hip1          | - |
| DMM1  | Cdkn2a <sup>-/-</sup> _C57 | SIN.LV.SF.GFP | LIVER  | 5 | 139088223 | + | NM_183025    | A430033K04Rik | + |
| DMM3  | Cdkn2a <sup>-/-</sup> _C57 | SIN.LV.SF.GFP | LIVER  | 5 | 144276658 | - | NM_009007    | Rac1          | - |
| DMM14 | Cdkn2a <sup>-/-</sup> _C57 | SIN.LV.SF.GFP | LIVER  | 5 | 147070981 | + | NM_153599    | Cdk8          | + |
| DMM5  | Cdkn2a <sup>-/-</sup> _C57 | SIN.LV.SF.GFP | LIVER  | 5 | 147079524 | + | NM_153599    | Cdk8          | + |
| DMM5  | Cdkn2a <sup>-/-</sup> _C57 | SIN.LV.SF.GFP | LIVER  | 5 | 149338745 | + | NM_011908    | Ubl3          | - |
| DMM1  | Cdkn2a <sup>-/-</sup> _C57 | SIN.LV.SF.GFP | LIVER  | 5 | 149767572 | + | NM_153572    | Katnal1       | - |
| DMM3  | Cdkn2a <sup>-/-</sup> _C57 | SIN.LV.SF.GFP | LIVER  | 5 | 151504017 | + | NM_175310    | Pds5b         | + |
| DMM6  | Cdkn2a <sup>-/-</sup> _C57 | SIN.LV.SF.GFP | SPLEEN | 5 | 151550040 | + | NM_175310    | Pds5b         | + |
| DMM1  | Cdkn2a <sup>-/-</sup> _C57 | SIN.LV.SF.GFP | LIVER  | 5 | 151612888 | - | NM_175310    | Pds5b         | + |
| DMM5  | Cdkn2a <sup>-/-</sup> _C57 | SIN.LV.SF.GFP | LIVER  | 6 | 3503538   | + | NM_024260    | Ccdc132       | + |
| DMM1  | Cdkn2a <sup>-/-</sup> _C57 | SIN.LV.SF.GFP | SPLEEN | 6 | 3701255   | + | NM_001042725 | Calcr         | - |
| DMM14 | Cdkn2a <sup>-/-</sup> _C57 | SIN.LV.SF.GFP | LIVER  | 6 | 6518876   | - | NM_009169    | Shfm1         | - |
| DMM14 | Cdkn2a <sup>-/-</sup> _C57 | SIN.LV.SF.GFP | LIVER  | 6 | 8506587   | - | NM_133236    | Glecc1        | + |
| DMM1  | Cdkn2a <sup>-/-</sup> _C57 | SIN.LV.SF.GFP | LIVER  | 6 | 9310776   | - | NM_008751    | Nxph1         | + |
| DMM9  | Cdkn2a <sup>-/-</sup> _C57 | SIN.LV.SF.GFP | LIVER  | 6 | 9648208   | - | NM_008751    | Nxph1         | + |
| DMM5  | Cdkn2a <sup>-/-</sup> _C57 | SIN.LV.SF.GFP | LIVER  | 6 | 11900885  | + | NM_029404    | Phf14         | + |
| DMM5  | Cdkn2a <sup>-/-</sup> _C57 | SIN.LV.SF.GFP | LIVER  | 6 | 12020595  | + | NR_003631    | Gm6578        | - |
| DMM12 | Cdkn2a <sup>-/-</sup> _C57 | SIN.LV.SF.GFP | SPLEEN | 6 | 13544907  | - | NM_028990    | Tmem168       | - |

|       |                            |               |        |   |          |   |              |               |   |
|-------|----------------------------|---------------|--------|---|----------|---|--------------|---------------|---|
| DMM1  | Cdkn2a <sup>-/-</sup> _C57 | SIN.LV.SF.GFP | SPLEEN | 6 | 13799596 | + | NM_145066    | Gpr85         | - |
| DMM1  | Cdkn2a <sup>-/-</sup> _C57 | SIN.LV.SF.GFP | LIVER  | 6 | 13811383 | - | NR_024619    | 2610001J05Rik | - |
| DMM1  | Cdkn2a <sup>-/-</sup> _C57 | SIN.LV.SF.GFP | LIVER  | 6 | 13833232 | + | NR_024619    | 2610001J05Rik | - |
| DMM4  | Cdkn2a <sup>-/-</sup> _C57 | SIN.LV.SF.GFP | SPLEEN | 6 | 15698427 | - | NM_175088    | Mdfic         | + |
| DMM1  | Cdkn2a <sup>-/-</sup> _C57 | SIN.LV.SF.GFP | SPLEEN | 6 | 15753522 | - | NM_175088    | Mdfic         | + |
| DMM14 | Cdkn2a <sup>-/-</sup> _C57 | SIN.LV.SF.GFP | LIVER  | 6 | 16782154 | + | NM_031198    | Tcfec         | - |
| DMM14 | Cdkn2a <sup>-/-</sup> _C57 | SIN.LV.SF.GFP | LIVER  | 6 | 16852532 | - | NM_031198    | Tcfec         | - |
| DMM1  | Cdkn2a <sup>-/-</sup> _C57 | SIN.LV.SF.GFP | LIVER  | 6 | 17683829 | + | NM_001083315 | St7           | + |
| DMM1  | Cdkn2a <sup>-/-</sup> _C57 | SIN.LV.SF.GFP | LIVER  | 6 | 17745335 | - | NM_001083315 | St7           | + |
| DMM3  | Cdkn2a <sup>-/-</sup> _C57 | SIN.LV.SF.GFP | LIVER  | 6 | 17872201 | - | NM_001083315 | St7           | + |
| DMM14 | Cdkn2a <sup>-/-</sup> _C57 | SIN.LV.SF.GFP | LIVER  | 6 | 19204108 | + | NM_029202    | Ankrd7        | + |
| DMM3  | Cdkn2a <sup>-/-</sup> _C57 | SIN.LV.SF.GFP | SPLEEN | 6 | 19504890 | - | NM_029202    | Ankrd7        | + |
| DMM5  | Cdkn2a <sup>-/-</sup> _C57 | SIN.LV.SF.GFP | LIVER  | 6 | 21918358 | - | NM_023626    | Ing3          | + |
| DMM3  | Cdkn2a <sup>-/-</sup> _C57 | SIN.LV.SF.GFP | LIVER  | 6 | 22286543 | + | NM_138587    | Fam3c         | - |
| DMM1  | Cdkn2a <sup>-/-</sup> _C57 | SIN.LV.SF.GFP | LIVER  | 6 | 22288484 | - | NM_138587    | Fam3c         | - |
| DMM8  | Cdkn2a <sup>-/-</sup> _C57 | SIN.LV.SF.GFP | LIVER  | 6 | 22291623 | - | NM_138587    | Fam3c         | - |
| DMM1  | Cdkn2a <sup>-/-</sup> _C57 | SIN.LV.SF.GFP | LIVER  | 6 | 22363853 | + | NM_138587    | Fam3c         | - |
| DMM2  | Cdkn2a <sup>-/-</sup> _C57 | SIN.LV.SF.GFP | LIVER  | 6 | 22431514 | - | NM_138587    | Fam3c         | - |
| DMM3  | Cdkn2a <sup>-/-</sup> _C57 | SIN.LV.SF.GFP | LIVER  | 6 | 22591856 | + | NM_001081306 | Ptprz1        | + |
| DMM5  | Cdkn2a <sup>-/-</sup> _C57 | SIN.LV.SF.GFP | LIVER  | 6 | 24808352 | - | NM_028957    | Hyal5         | + |
| DMM18 | Cdkn2a <sup>-/-</sup> _C57 | SIN.LV.SF.GFP | SPLEEN | 6 | 24922170 | - | NM_177013    | 6332401O19Rik | - |
| DMM3  | Cdkn2a <sup>-/-</sup> _C57 | SIN.LV.SF.GFP | LIVER  | 6 | 25709359 | + | NM_133931    | Pot1a         | - |
| DMM6  | Cdkn2a <sup>-/-</sup> _C57 | SIN.LV.SF.GFP | LIVER  | 6 | 26354240 | + | NM_133931    | Pot1a         | - |
| DMM1  | Cdkn2a <sup>-/-</sup> _C57 | SIN.LV.SF.GFP | LIVER  | 6 | 26360314 | + | NM_133931    | Pot1a         | - |
| DMM9  | Cdkn2a <sup>-/-</sup> _C57 | SIN.LV.SF.GFP | LIVER  | 6 | 26371759 | - | NM_133931    | Pot1a         | - |
| DMM7  | Cdkn2a <sup>-/-</sup> _C57 | SIN.LV.SF.GFP | LIVER  | 6 | 27711404 | - | NM_008174    | Grm8          | - |
| DMM1  | Cdkn2a <sup>-/-</sup> _C57 | SIN.LV.SF.GFP | SPLEEN | 6 | 31340855 | - | NM_013791    | Mkln1         | + |
| DMM5  | Cdkn2a <sup>-/-</sup> _C57 | SIN.LV.SF.GFP | LIVER  | 6 | 32922456 | + | NM_025336    | Chchd3        | - |
| DMM1  | Cdkn2a <sup>-/-</sup> _C57 | SIN.LV.SF.GFP | LIVER  | 6 | 35050457 | - | NM_016877    | Cnot4         | - |
| DMM5  | Cdkn2a <sup>-/-</sup> _C57 | SIN.LV.SF.GFP | LIVER  | 6 | 35474491 | - | NM_008098    | Mtpn          | - |
| DMM14 | Cdkn2a <sup>-/-</sup> _C57 | SIN.LV.SF.GFP | LIVER  | 6 | 39641816 | - | NM_139294    | Braf          | - |

|       |                            |               |                |   |          |   |              |               |   |
|-------|----------------------------|---------------|----------------|---|----------|---|--------------|---------------|---|
| DMM5  | Cdkn2a <sup>-/-</sup> _C57 | SIN.LV.SF.GFP | LIVER          | 6 | 40536914 | - | NM_001038604 | Clec5a        | - |
| DMM1  | Cdkn2a <sup>-/-</sup> _C57 | SIN.LV.SF.GFP | LIVER          | 6 | 42370629 | - | NM_207028    | Tas2r126      | + |
| DMM5  | Cdkn2a <sup>-/-</sup> _C57 | SIN.LV.SF.GFP | LIVER          | 6 | 42880032 | + | NM_146295    | Olf446        | + |
| DMM8  | Cdkn2a <sup>-/-</sup> _C57 | SIN.LV.SF.GFP | LIVER - SPLEEN | 6 | 43331748 | - | NM_013861    | Tpk1          | - |
| DMM4  | Cdkn2a <sup>-/-</sup> _C57 | SIN.LV.SF.GFP | SPLEEN         | 6 | 43336974 | + | NM_013861    | Tpk1          | - |
| DMM7  | Cdkn2a <sup>-/-</sup> _C57 | SIN.LV.SF.GFP | LIVER          | 6 | 43405391 | + | NM_013861    | Tpk1          | - |
| DMM5  | Cdkn2a <sup>-/-</sup> _C57 | SIN.LV.SF.GFP | LIVER          | 6 | 43584245 | + | NM_013861    | Tpk1          | - |
| DMM3  | Cdkn2a <sup>-/-</sup> _C57 | SIN.LV.SF.GFP | LIVER          | 6 | 45015533 | - | NM_001004357 | Cntnap2       | + |
| DMM1  | Cdkn2a <sup>-/-</sup> _C57 | SIN.LV.SF.GFP | LIVER          | 6 | 46093742 | - | NM_001004357 | Cntnap2       | + |
| DMM1  | Cdkn2a <sup>-/-</sup> _C57 | SIN.LV.SF.GFP | LIVER          | 6 | 46127192 | + | NM_001004357 | Cntnap2       | + |
| DMM3  | Cdkn2a <sup>-/-</sup> _C57 | SIN.LV.SF.GFP | LIVER          | 6 | 47569826 | - | NM_001146689 | Ezh2          | - |
| DMM14 | Cdkn2a <sup>-/-</sup> _C57 | SIN.LV.SF.GFP | LIVER          | 6 | 47795086 | - | NM_027477    | Zfp398        | + |
| DMM1  | Cdkn2a <sup>-/-</sup> _C57 | SIN.LV.SF.GFP | LIVER          | 6 | 50115651 | - | NM_019939    | Mpp6          | + |
| DMM6  | Cdkn2a <sup>-/-</sup> _C57 | SIN.LV.SF.GFP | LIVER          | 6 | 54144545 | + | NM_023543    | Chn2          | + |
| DMM3  | Cdkn2a <sup>-/-</sup> _C57 | SIN.LV.SF.GFP | LIVER          | 6 | 56675751 | - | NM_030235    | Avl9          | + |
| DMM14 | Cdkn2a <sup>-/-</sup> _C57 | SIN.LV.SF.GFP | LIVER          | 6 | 56701692 | - | NM_030235    | Avl9          | + |
| DMM1  | Cdkn2a <sup>-/-</sup> _C57 | SIN.LV.SF.GFP | LIVER          | 6 | 57613659 | - | NM_025574    | Pigy          | - |
| DMM1  | Cdkn2a <sup>-/-</sup> _C57 | SIN.LV.SF.GFP | LIVER          | 6 | 59139227 | + | NM_001081145 | Tigd2         | + |
| DMM3  | Cdkn2a <sup>-/-</sup> _C57 | SIN.LV.SF.GFP | LIVER          | 6 | 63479416 | + | NM_008167    | Grid2         | + |
| DMM3  | Cdkn2a <sup>-/-</sup> _C57 | SIN.LV.SF.GFP | LIVER          | 6 | 65045581 | - | NM_007958    | Smarcad1      | + |
| DMM1  | Cdkn2a <sup>-/-</sup> _C57 | SIN.LV.SF.GFP | LIVER          | 6 | 65840390 | - | NM_027547    | Prdm5         | + |
| DMM1  | Cdkn2a <sup>-/-</sup> _C57 | SIN.LV.SF.GFP | LIVER          | 6 | 65850603 | + | NM_027547    | Prdm5         | + |
| DMM14 | Cdkn2a <sup>-/-</sup> _C57 | SIN.LV.SF.GFP | LIVER          | 6 | 66493690 | - | NM_019499    | Mad21l        | + |
| DMM14 | Cdkn2a <sup>-/-</sup> _C57 | SIN.LV.SF.GFP | LIVER          | 6 | 67219820 | + | NM_001113564 | Serbp1        | + |
| DMM5  | Cdkn2a <sup>-/-</sup> _C57 | SIN.LV.SF.GFP | LIVER          | 6 | 67224251 | - | NM_001113564 | Serbp1        | + |
| DMM14 | Cdkn2a <sup>-/-</sup> _C57 | SIN.LV.SF.GFP | LIVER          | 6 | 71449380 | + | NM_009543    | Rnf103        | + |
| DMM2  | Cdkn2a <sup>-/-</sup> _C57 | SIN.LV.SF.GFP | LIVER          | 6 | 73387712 | + | NM_025737    | 4931417E11Rik | - |
| DMM1  | Cdkn2a <sup>-/-</sup> _C57 | SIN.LV.SF.GFP | LIVER          | 6 | 73699179 | + | NM_025737    | 4931417E11Rik | - |
| DMM1  | Cdkn2a <sup>-/-</sup> _C57 | SIN.LV.SF.GFP | LIVER          | 6 | 81392322 | - | NM_177884    | AW146020      | + |
| DMM9  | Cdkn2a <sup>-/-</sup> _C57 | SIN.LV.SF.GFP | LIVER          | 6 | 81421505 | + | NM_177884    | AW146020      | + |
| DMM7  | Cdkn2a <sup>-/-</sup> _C57 | SIN.LV.SF.GFP | LIVER          | 6 | 81639788 | - | NM_177884    | AW146020      | + |

|       |                            |               |        |   |           |   |              |           |   |
|-------|----------------------------|---------------|--------|---|-----------|---|--------------|-----------|---|
| DMM7  | Cdkn2a <sup>-/-</sup> _C57 | SIN.LV.SF.GFP | LIVER  | 6 | 82033188  | - | NM_145570    | Fam176a   | + |
| DMM1  | Cdkn2a <sup>-/-</sup> _C57 | SIN.LV.SF.GFP | LIVER  | 6 | 82717539  | - | NM_013820    | Hk2       | - |
| DMM1  | Cdkn2a <sup>-/-</sup> _C57 | SIN.LV.SF.GFP | LIVER  | 6 | 82752131  | + | NM_013820    | Hk2       | - |
| DMM14 | Cdkn2a <sup>-/-</sup> _C57 | SIN.LV.SF.GFP | LIVER  | 6 | 84761946  | - | NM_177077    | Exoc6b    | - |
| DMM3  | Cdkn2a <sup>-/-</sup> _C57 | SIN.LV.SF.GFP | LIVER  | 6 | 90318340  | + | NM_030260    | Zxdc      | + |
| DMM5  | Cdkn2a <sup>-/-</sup> _C57 | SIN.LV.SF.GFP | LIVER  | 6 | 92072801  | - | NM_011630    | Nr2c2     | + |
| DMM5  | Cdkn2a <sup>-/-</sup> _C57 | SIN.LV.SF.GFP | LIVER  | 6 | 94491968  | + | NM_026255    | Slc25a26  | + |
| DMM14 | Cdkn2a <sup>-/-</sup> _C57 | SIN.LV.SF.GFP | LIVER  | 6 | 97113126  | + | NM_001081111 | Tmf1      | - |
| DMM3  | Cdkn2a <sup>-/-</sup> _C57 | SIN.LV.SF.GFP | LIVER  | 6 | 97148729  | + | NM_001111106 | Uba3      | - |
| DMM14 | Cdkn2a <sup>-/-</sup> _C57 | SIN.LV.SF.GFP | LIVER  | 6 | 97216332  | - | NM_001081157 | Lmod3     | - |
| DMM1  | Cdkn2a <sup>-/-</sup> _C57 | SIN.LV.SF.GFP | LIVER  | 6 | 100226574 | - | NM_019743    | Rybp      | - |
| DMM5  | Cdkn2a <sup>-/-</sup> _C57 | SIN.LV.SF.GFP | LIVER  | 6 | 100809393 | + | NM_182939    | Ppp4r2    | + |
| DMM3  | Cdkn2a <sup>-/-</sup> _C57 | SIN.LV.SF.GFP | LIVER  | 6 | 103279992 | + | NM_007697    | Chl1      | + |
| DMM5  | Cdkn2a <sup>-/-</sup> _C57 | SIN.LV.SF.GFP | SPLEEN | 6 | 103473673 | - | NM_007697    | Chl1      | + |
| DMM1  | Cdkn2a <sup>-/-</sup> _C57 | SIN.LV.SF.GFP | LIVER  | 6 | 103474798 | - | NM_007697    | Chl1      | + |
| DMM18 | Cdkn2a <sup>-/-</sup> _C57 | SIN.LV.SF.GFP | LIVER  | 6 | 106723778 | - | NM_027296    | Trnt1     | + |
| DMM14 | Cdkn2a <sup>-/-</sup> _C57 | SIN.LV.SF.GFP | LIVER  | 6 | 106740007 | - | NM_021449    | Crbn      | - |
| DMM14 | Cdkn2a <sup>-/-</sup> _C57 | SIN.LV.SF.GFP | SPLEEN | 6 | 108432886 | - | NM_010585    | Itrp1     | + |
| DMM13 | Cdkn2a <sup>-/-</sup> _C57 | SIN.LV.SF.GFP | SPLEEN | 6 | 109131270 | + | NM_138677    | Edem1     | + |
| DMM7  | Cdkn2a <sup>-/-</sup> _C57 | SIN.LV.SF.GFP | LIVER  | 6 | 112257001 | - | NM_144799    | Lmcd1     | + |
| DMM3  | Cdkn2a <sup>-/-</sup> _C57 | SIN.LV.SF.GFP | LIVER  | 6 | 112714815 | + | NM_080448    | Srgap3    | - |
| DMM5  | Cdkn2a <sup>-/-</sup> _C57 | SIN.LV.SF.GFP | LIVER  | 6 | 113058886 | + | NM_028385    | Setd5     | + |
| DMM5  | Cdkn2a <sup>-/-</sup> _C57 | SIN.LV.SF.GFP | LIVER  | 6 | 114737106 | - | NM_028835    | Atg7      | + |
| DMM3  | Cdkn2a <sup>-/-</sup> _C57 | SIN.LV.SF.GFP | LIVER  | 6 | 115703077 | + | NM_144805    | Tmem40    | - |
| DMM2  | Cdkn2a <sup>-/-</sup> _C57 | SIN.LV.SF.GFP | SPLEEN | 6 | 116096597 | + | NM_026585    | D6Wsu116e | + |
| DMM9  | Cdkn2a <sup>-/-</sup> _C57 | SIN.LV.SF.GFP | LIVER  | 6 | 116312398 | - | NM_027920    | 8-Mar     | + |
| DMM12 | Cdkn2a <sup>-/-</sup> _C57 | SIN.LV.SF.GFP | SPLEEN | 6 | 116319271 | + | NM_027920    | 8-Mar     | + |
| DMM1  | Cdkn2a <sup>-/-</sup> _C57 | SIN.LV.SF.GFP | LIVER  | 6 | 118513154 | - | NM_001081112 | Ankrd26   | - |
| DMM14 | Cdkn2a <sup>-/-</sup> _C57 | SIN.LV.SF.GFP | LIVER  | 6 | 119899195 | + | NM_198703    | Wnk1      | - |
| DMM14 | Cdkn2a <sup>-/-</sup> _C57 | SIN.LV.SF.GFP | SPLEEN | 6 | 119963843 | + | NM_198703    | Wnk1      | - |
| DMM1  | Cdkn2a <sup>-/-</sup> _C57 | SIN.LV.SF.GFP | LIVER  | 6 | 120319511 | - | NM_145997    | Kdm5a     | + |

|       |                            |               |             |   |           |   |              |               |   |
|-------|----------------------------|---------------|-------------|---|-----------|---|--------------|---------------|---|
| DMM1  | Cdkn2a <sup>-/-</sup> _C57 | SIN.LV.SF.GFP | SPLEEN      | 6 | 122798908 | - | NM_009779    | C3ar1         | - |
| DMM7  | Cdkn2a <sup>-/-</sup> _C57 | SIN.LV.SF.GFP | LIVER       | 6 | 129161399 | - | NM_053109    | Clec2d        | + |
| DMM14 | Cdkn2a <sup>-/-</sup> _C57 | SIN.LV.SF.GFP | LIVER       | 6 | 129545687 | - | NM_010654    | Klrd1         | + |
| DMM3  | Cdkn2a <sup>-/-</sup> _C57 | SIN.LV.SF.GFP | LIVER       | 6 | 129573166 | - | NM_001083322 | Klrk1         | - |
| DMM1  | Cdkn2a <sup>-/-</sup> _C57 | SIN.LV.SF.GFP | LIVER       | 6 | 129573828 | - | NM_001083322 | Klrk1         | - |
| DMM5  | Cdkn2a <sup>-/-</sup> _C57 | SIN.LV.SF.GFP | SPLEEN      | 6 | 129664550 | + | NM_001012520 | Klri1         | - |
| DMM14 | Cdkn2a <sup>-/-</sup> _C57 | SIN.LV.SF.GFP | LIVER       | 6 | 131177355 | - | NM_008462    | Klra2         | - |
| DMM5  | Cdkn2a <sup>-/-</sup> _C57 | SIN.LV.SF.GFP | LIVER       | 6 | 134851555 | - | NM_008157    | Gpr19         | - |
| DMM1  | Cdkn2a <sup>-/-</sup> _C57 | SIN.LV.SF.GFP | LIVER       | 6 | 140547777 | + | NM_144920    | Plekha5       | + |
| DMM1  | Cdkn2a <sup>-/-</sup> _C57 | SIN.LV.SF.GFP | LIVER       | 6 | 140580414 | - | NM_009637    | Aebp2         | + |
| DMM1  | Cdkn2a <sup>-/-</sup> _C57 | SIN.LV.SF.GFP | SPLEEN      | 6 | 146076657 | - | NM_010586    | Itr2          | - |
| DMM9  | Cdkn2a <sup>-/-</sup> _C57 | SIN.LV.SF.GFP | LIVER       | 6 | 146320126 | - | NM_010586    | Itr2          | - |
| DMM8  | Cdkn2a <sup>-/-</sup> _C57 | SIN.LV.SF.GFP | LIVER       | 6 | 146539533 | - | NM_026218    | Fgfr1op2      | + |
| DMM5  | Cdkn2a <sup>-/-</sup> _C57 | SIN.LV.SF.GFP | LIVER       | 6 | 147481693 | + | NM_025911    | Ccdc91        | + |
| DMM18 | Cdkn2a <sup>-/-</sup> _C57 | SIN.LV.SF.GFP | SPLEEN      | 6 | 148138541 | + | NM_026355    | Ergic2        | - |
| DMM3  | Cdkn2a <sup>-/-</sup> _C57 | SIN.LV.SF.GFP | LIVER       | 6 | 149187697 | - | NM_001113424 | Amn1          | - |
| DMM18 | Cdkn2a <sup>-/-</sup> _C57 | SIN.LV.SF.GFP | SPLEEN      | 7 | 4981001   | + | NM_001033383 | 6430526N21Rik | + |
| DMM5  | Cdkn2a <sup>-/-</sup> _C57 | SIN.LV.SF.GFP | SPLEEN      | 7 | 6279583   | - | NM_001033249 | Zfp583        | - |
| DMM3  | Cdkn2a <sup>-/-</sup> _C57 | SIN.LV.SF.GFP | LIVER       | 7 | 6279912   | + | NM_001033249 | Zfp583        | - |
| DMM1  | Cdkn2a <sup>-/-</sup> _C57 | SIN.LV.SF.GFP | LIVER       | 7 | 20084268  | + | NM_177692    | Bloc1s3       | - |
| DMM9  | Cdkn2a <sup>-/-</sup> _C57 | SIN.LV.SF.GFP | LIVER       | 7 | 26425089  | + | NM_007533    | Bckdha        | - |
| DMM3  | Cdkn2a <sup>-/-</sup> _C57 | SIN.LV.SF.GFP | LIVER       | 7 | 26484850  | + | NM_011577    | Tgfb1         | + |
| DMM1  | Cdkn2a <sup>-/-</sup> _C57 | SIN.LV.SF.GFP | LIVER       | 7 | 31905963  | - | NM_011322    | Scn1b         | - |
| DMM14 | Cdkn2a <sup>-/-</sup> _C57 | SIN.LV.SF.GFP | LIVER       | 7 | 35075555  | - | NM_172741    | 4931406P16Rik | - |
| DMM1  | Cdkn2a <sup>-/-</sup> _C57 | SIN.LV.SF.GFP | LIVER       | 7 | 35158411  | - | NM_025948    | Lsm14a        | - |
| DMM13 | Cdkn2a <sup>-/-</sup> _C57 | SIN.LV.SF.GFP | SPLEEN      | 7 | 36203546  | - | NM_028120    | Ccdc123       | + |
| DMM1  | Cdkn2a <sup>-/-</sup> _C57 | SIN.LV.SF.GFP | LIVER       | 7 | 37506213  | + | NM_172298    | Tshz3         | + |
| DMM8  | Cdkn2a <sup>-/-</sup> _C57 | SIN.LV.SF.GFP | SPLEEN      | 7 | 47713192  | + | NM_021387    | Vstm2b        | + |
| DMM8  | Cdkn2a <sup>-/-</sup> _C57 | SIN.LV.SF.GFP | VER - SPLEE | 7 | 47713258  | - | NM_021387    | Vstm2b        | + |
| DMM8  | Cdkn2a <sup>-/-</sup> _C57 | SIN.LV.SF.GFP | LIVER       | 7 | 48790451  | + | NM_001033530 | AW146154      | - |
| DMM9  | Cdkn2a <sup>-/-</sup> _C57 | SIN.LV.SF.GFP | LIVER       | 7 | 48876962  | + | NM_023363    | Zfp788        | + |

|       |                            |               |                |   |          |   |              |               |   |
|-------|----------------------------|---------------|----------------|---|----------|---|--------------|---------------|---|
| DMM3  | Cdkn2a <sup>-/-</sup> _C57 | SIN.LV.SF.GFP | LIVER          | 7 | 54064331 | + | NM_008186    | Gtf2h1        | + |
| DMM1  | Cdkn2a <sup>-/-</sup> _C57 | SIN.LV.SF.GFP | LIVER          | 7 | 58049468 | - | NM_001037906 | Nell1         | + |
| DMM7  | Cdkn2a <sup>-/-</sup> _C57 | SIN.LV.SF.GFP | SPLEEN         | 7 | 59163275 | + | NM_008087    | Gas2          | + |
| DMM3  | Cdkn2a <sup>-/-</sup> _C57 | SIN.LV.SF.GFP | LIVER          | 7 | 59172039 | + | NM_008087    | Gas2          | + |
| DMM5  | Cdkn2a <sup>-/-</sup> _C57 | SIN.LV.SF.GFP | LIVER          | 7 | 66052452 | + | NM_009728    | Atp10a        | + |
| DMM1  | Cdkn2a <sup>-/-</sup> _C57 | SIN.LV.SF.GFP | LIVER          | 7 | 66493672 | + | NM_001033962 | Ube3a         | + |
| DMM3  | Cdkn2a <sup>-/-</sup> _C57 | SIN.LV.SF.GFP | LIVER          | 7 | 66504362 | - | NM_001033962 | Ube3a         | + |
| DMM14 | Cdkn2a <sup>-/-</sup> _C57 | SIN.LV.SF.GFP | SPLEEN         | 7 | 66522917 | + | NM_173010    | Ube3a         | + |
| DMM14 | Cdkn2a <sup>-/-</sup> _C57 | SIN.LV.SF.GFP | LIVER          | 7 | 66533228 | + | NM_173010    | Ube3a         | + |
| DMM1  | Cdkn2a <sup>-/-</sup> _C57 | SIN.LV.SF.GFP | SPLEEN         | 7 | 66540268 | + | NM_173010    | Ube3a         | + |
| DMM3  | Cdkn2a <sup>-/-</sup> _C57 | SIN.LV.SF.GFP | LIVER          | 7 | 71451134 | + | NM_172742    | Mtmr10        | + |
| DMM14 | Cdkn2a <sup>-/-</sup> _C57 | SIN.LV.SF.GFP | LIVER          | 7 | 72234612 | - | NM_183087    | 5730507A09Rik | - |
| DMM3  | Cdkn2a <sup>-/-</sup> _C57 | SIN.LV.SF.GFP | LIVER          | 7 | 73816078 | - | NM_080443    | Asb7          | - |
| DMM14 | Cdkn2a <sup>-/-</sup> _C57 | SIN.LV.SF.GFP | LIVER          | 7 | 73825764 | + | NM_080443    | Asb7          | - |
| DMM1  | Cdkn2a <sup>-/-</sup> _C57 | SIN.LV.SF.GFP | LIVER          | 7 | 74379865 | - | NM_001033713 | Mef2a         | - |
| DMM3  | Cdkn2a <sup>-/-</sup> _C57 | SIN.LV.SF.GFP | LIVER          | 7 | 74427840 | + | NM_001033713 | Mef2a         | - |
| DMM1  | Cdkn2a <sup>-/-</sup> _C57 | SIN.LV.SF.GFP | LIVER          | 7 | 74471897 | + | NM_001033713 | Mef2a         | - |
| DMM1  | Cdkn2a <sup>-/-</sup> _C57 | SIN.LV.SF.GFP | LIVER          | 7 | 76630017 | + | NM_001042592 | Arrdc4        | - |
| DMM5  | Cdkn2a <sup>-/-</sup> _C57 | SIN.LV.SF.GFP | LIVER          | 7 | 78009237 | + | NM_183261    | Nr2f2         | - |
| DMM1  | Cdkn2a <sup>-/-</sup> _C57 | SIN.LV.SF.GFP | LIVER          | 7 | 82505989 | - | NM_153579    | Sv2b          | - |
| DMM8  | Cdkn2a <sup>-/-</sup> _C57 | SIN.LV.SF.GFP | LIVER - SPLEEN | 7 | 82855666 | + | NM_029332    | Akap13        | + |
| DMM3  | Cdkn2a <sup>-/-</sup> _C57 | SIN.LV.SF.GFP | LIVER          | 7 | 83625154 | + | NM_001122780 | Klhl25        | + |
| DMM3  | Cdkn2a <sup>-/-</sup> _C57 | SIN.LV.SF.GFP | LIVER          | 7 | 89852838 | + | NM_001159672 | Eftud1        | + |
| DMM3  | Cdkn2a <sup>-/-</sup> _C57 | SIN.LV.SF.GFP | LIVER          | 7 | 90739738 | + | NM_177695    | Tmc3          | + |
| DMM1  | Cdkn2a <sup>-/-</sup> _C57 | SIN.LV.SF.GFP | LIVER          | 7 | 90864871 | + | NM_010551    | Il16          | - |
| DMM14 | Cdkn2a <sup>-/-</sup> _C57 | SIN.LV.SF.GFP | LIVER          | 7 | 90875745 | + | NM_010551    | Il16          | - |
| DMM14 | Cdkn2a <sup>-/-</sup> _C57 | SIN.LV.SF.GFP | SPLEEN         | 7 | 91796415 | + | NM_022985    | Zfand6        | - |
| DMM5  | Cdkn2a <sup>-/-</sup> _C57 | SIN.LV.SF.GFP | LIVER          | 7 | 91822424 | + | NM_022985    | Zfand6        | - |
| DMM3  | Cdkn2a <sup>-/-</sup> _C57 | SIN.LV.SF.GFP | SPLEEN         | 7 | 95312309 | - | NM_001081414 | Grm5          | + |
| DMM1  | Cdkn2a <sup>-/-</sup> _C57 | SIN.LV.SF.GFP | LIVER          | 7 | 95344762 | - | NM_001081414 | Grm5          | + |
| DMM5  | Cdkn2a <sup>-/-</sup> _C57 | SIN.LV.SF.GFP | LIVER          | 7 | 96342428 | - | NM_028343    | Tmem135       | - |

|       |                            |               |                |   |           |   |              |         |   |
|-------|----------------------------|---------------|----------------|---|-----------|---|--------------|---------|---|
| DMM18 | Cdkn2a <sup>-/-</sup> _C57 | SIN.LV.SF.GFP | SPLEEN         | 7 | 96377986  | - | NM_028343    | Tmem135 | - |
| DMM3  | Cdkn2a <sup>-/-</sup> _C57 | SIN.LV.SF.GFP | LIVER          | 7 | 96429076  | - | NM_028343    | Tmem135 | - |
| DMM14 | Cdkn2a <sup>-/-</sup> _C57 | SIN.LV.SF.GFP | LIVER          | 7 | 97322171  | + | NM_146194    | Picalm  | + |
| DMM1  | Cdkn2a <sup>-/-</sup> _C57 | SIN.LV.SF.GFP | SPLEEN         | 7 | 98767613  | + | NM_011807    | Dlg2    | + |
| DMM9  | Cdkn2a <sup>-/-</sup> _C57 | SIN.LV.SF.GFP | LIVER          | 7 | 100131637 | + | NM_028243    | Prcp    | + |
| DMM3  | Cdkn2a <sup>-/-</sup> _C57 | SIN.LV.SF.GFP | SPLEEN         | 7 | 100156236 | - | NM_021427    | Fam181b | + |
| DMM5  | Cdkn2a <sup>-/-</sup> _C57 | SIN.LV.SF.GFP | LIVER          | 7 | 100156383 | - | NM_021427    | Fam181b | + |
| DMM1  | Cdkn2a <sup>-/-</sup> _C57 | SIN.LV.SF.GFP | LIVER          | 7 | 103627279 | + | NM_011858    | Odz4    | + |
| DMM1  | Cdkn2a <sup>-/-</sup> _C57 | SIN.LV.SF.GFP | LIVER          | 7 | 104789397 | - | NM_001081267 | Rsf1    | + |
| DMM1  | Cdkn2a <sup>-/-</sup> _C57 | SIN.LV.SF.GFP | LIVER          | 7 | 106205144 | - | NM_178635    | Uvrag   | - |
| DMM9  | Cdkn2a <sup>-/-</sup> _C57 | SIN.LV.SF.GFP | SPLEEN         | 7 | 108000957 | + | NM_177073    | Relt    | - |
| DMM14 | Cdkn2a <sup>-/-</sup> _C57 | SIN.LV.SF.GFP | SPLEEN         | 7 | 109469111 | + | NM_009287    | Stim1   | + |
| DMM14 | Cdkn2a <sup>-/-</sup> _C57 | SIN.LV.SF.GFP | SPLEEN         | 7 | 109477169 | + | NM_009287    | Stim1   | + |
| DMM1  | Cdkn2a <sup>-/-</sup> _C57 | SIN.LV.SF.GFP | LIVER          | 7 | 109550895 | + | NM_009287    | Stim1   | + |
| DMM3  | Cdkn2a <sup>-/-</sup> _C57 | SIN.LV.SF.GFP | LIVER          | 7 | 110908193 | - | NM_147098    | Olfr630 | - |
| DMM8  | Cdkn2a <sup>-/-</sup> _C57 | SIN.LV.SF.GFP | LIVER          | 7 | 111389099 | + | NM_030684    | Trim34  | + |
| DMM5  | Cdkn2a <sup>-/-</sup> _C57 | SIN.LV.SF.GFP | LIVER          | 7 | 111579825 | + | NM_009099    | Trim30  | - |
| DMM5  | Cdkn2a <sup>-/-</sup> _C57 | SIN.LV.SF.GFP | LIVER          | 7 | 113770388 | - | NM_146453    | Olfr693 | - |
| DMM14 | Cdkn2a <sup>-/-</sup> _C57 | SIN.LV.SF.GFP | LIVER          | 7 | 114888448 | + | NM_008905    | Ppfibp2 | + |
| DMM14 | Cdkn2a <sup>-/-</sup> _C57 | SIN.LV.SF.GFP | LIVER          | 7 | 116771959 | + | NM_001001326 | St5     | - |
| DMM14 | Cdkn2a <sup>-/-</sup> _C57 | SIN.LV.SF.GFP | LIVER          | 7 | 117557291 | + | NM_009302    | Swap70  | + |
| DMM1  | Cdkn2a <sup>-/-</sup> _C57 | SIN.LV.SF.GFP | LIVER          | 7 | 121611792 | + | NM_011055    | Pde3b   | + |
| DMM9  | Cdkn2a <sup>-/-</sup> _C57 | SIN.LV.SF.GFP | SPLEEN         | 7 | 121623692 | - | NM_011055    | Pde3b   | + |
| DMM7  | Cdkn2a <sup>-/-</sup> _C57 | SIN.LV.SF.GFP | SPLEEN         | 7 | 122184521 | + | NM_173767    | Insc    | + |
| DMM8  | Cdkn2a <sup>-/-</sup> _C57 | SIN.LV.SF.GFP | LIVER - SPLEEN | 7 | 123508770 | + | NM_011083    | Pik3c2a | - |
| DMM1  | Cdkn2a <sup>-/-</sup> _C57 | SIN.LV.SF.GFP | LIVER          | 7 | 125651301 | + | NM_001033380 | Itpril2 | - |
| DMM3  | Cdkn2a <sup>-/-</sup> _C57 | SIN.LV.SF.GFP | LIVER          | 7 | 128200929 | + | NM_021554    | Mettl9  | + |
| DMM14 | Cdkn2a <sup>-/-</sup> _C57 | SIN.LV.SF.GFP | LIVER          | 7 | 128835840 | - | NM_001033173 | Usp31   | - |
| DMM11 | Cdkn2a <sup>-/-</sup> _C57 | SIN.LV.SF.GFP | LIVER - LIVER  | 7 | 130125927 | - | NM_011247    | Rbbp6   | + |
| DMM14 | Cdkn2a <sup>-/-</sup> _C57 | SIN.LV.SF.GFP | LIVER          | 7 | 132735167 | - | NM_021887    | Ii21r   | + |
| DMM1  | Cdkn2a <sup>-/-</sup> _C57 | SIN.LV.SF.GFP | LIVER          | 7 | 134147422 | - | NM_080638    | Mvp     | - |

|       |                            |               |        |   |           |   |              |               |   |
|-------|----------------------------|---------------|--------|---|-----------|---|--------------|---------------|---|
| DMM5  | Cdkn2a <sup>-/-</sup> _C57 | SIN.LV.SF.GFP | LIVER  | 7 | 135599896 | - | NM_009383    | Tiall         | - |
| DMM3  | Cdkn2a <sup>-/-</sup> _C57 | SIN.LV.SF.GFP | LIVER  | 7 | 135874776 | - | NM_145955    | 1110007A13Rik | - |
| DMM3  | Cdkn2a <sup>-/-</sup> _C57 | SIN.LV.SF.GFP | LIVER  | 7 | 138704818 | - | NM_009774    | Bub3          | + |
| DMM9  | Cdkn2a <sup>-/-</sup> _C57 | SIN.LV.SF.GFP | SPLEEN | 7 | 140008150 | - | NM_212473    | Fam53b        | - |
| DMM5  | Cdkn2a <sup>-/-</sup> _C57 | SIN.LV.SF.GFP | LIVER  | 7 | 140154355 | + | NM_207302    | Zranb1        | + |
| DMM3  | Cdkn2a <sup>-/-</sup> _C57 | SIN.LV.SF.GFP | LIVER  | 7 | 142225793 | + | NM_001033420 | Dock1         | + |
| DMM14 | Cdkn2a <sup>-/-</sup> _C57 | SIN.LV.SF.GFP | LIVER  | 7 | 144172226 | + | NM_008598    | Mgmt          | + |
| DMM9  | Cdkn2a <sup>-/-</sup> _C57 | SIN.LV.SF.GFP | LIVER  | 8 | 5555193   | + | NM_011388    | Slc10a2       | - |
| DMM14 | Cdkn2a <sup>-/-</sup> _C57 | SIN.LV.SF.GFP | LIVER  | 8 | 6140758   | - | NM_011388    | Slc10a2       | - |
| DMM1  | Cdkn2a <sup>-/-</sup> _C57 | SIN.LV.SF.GFP | LIVER  | 8 | 6462385   | - | NM_011388    | Slc10a2       | - |
| DMM3  | Cdkn2a <sup>-/-</sup> _C57 | SIN.LV.SF.GFP | LIVER  | 8 | 15266992  | - | NM_008664    | Myom2         | + |
| DMM3  | Cdkn2a <sup>-/-</sup> _C57 | SIN.LV.SF.GFP | SPLEEN | 8 | 23268462  | - | NM_011848    | Nek3          | - |
| DMM1  | Cdkn2a <sup>-/-</sup> _C57 | SIN.LV.SF.GFP | SPLEEN | 8 | 23318694  | + | NM_027338    | Vps36         | + |
| DMM5  | Cdkn2a <sup>-/-</sup> _C57 | SIN.LV.SF.GFP | LIVER  | 8 | 23645728  | + | NM_011394    | Slc20a2       | + |
| DMM1  | Cdkn2a <sup>-/-</sup> _C57 | SIN.LV.SF.GFP | LIVER  | 8 | 23972859  | + | NM_001081149 | Myst3         | + |
| DMM3  | Cdkn2a <sup>-/-</sup> _C57 | SIN.LV.SF.GFP | LIVER  | 8 | 26121511  | + | NM_007404    | Adam9         | - |
| DMM3  | Cdkn2a <sup>-/-</sup> _C57 | SIN.LV.SF.GFP | LIVER  | 8 | 27192613  | + | NM_207659    | Hook3         | - |
| DMM3  | Cdkn2a <sup>-/-</sup> _C57 | SIN.LV.SF.GFP | LIVER  | 8 | 32047899  | + | NM_025869    | Dusp26        | + |
| DMM5  | Cdkn2a <sup>-/-</sup> _C57 | SIN.LV.SF.GFP | LIVER  | 8 | 34451727  | - | NM_001122822 | Wrn           | - |
| DMM7  | Cdkn2a <sup>-/-</sup> _C57 | SIN.LV.SF.GFP | LIVER  | 8 | 34505018  | - | NM_001098233 | Purg          | + |
| DMM1  | Cdkn2a <sup>-/-</sup> _C57 | SIN.LV.SF.GFP | SPLEEN | 8 | 34724331  | - | NM_017374    | Ppp2cb        | + |
| DMM9  | Cdkn2a <sup>-/-</sup> _C57 | SIN.LV.SF.GFP | LIVER  | 8 | 35948480  | - | NM_175091    | Tnks          | - |
| DMM14 | Cdkn2a <sup>-/-</sup> _C57 | SIN.LV.SF.GFP | LIVER  | 8 | 35957017  | - | NM_175091    | Tnks          | - |
| DMM1  | Cdkn2a <sup>-/-</sup> _C57 | SIN.LV.SF.GFP | LIVER  | 8 | 36681333  | + | NM_001081279 | Mfhas1        | + |
| DMM3  | Cdkn2a <sup>-/-</sup> _C57 | SIN.LV.SF.GFP | LIVER  | 8 | 37196579  | - | NM_172911    | D8Ertd82e     | + |
| DMM9  | Cdkn2a <sup>-/-</sup> _C57 | SIN.LV.SF.GFP | SPLEEN | 8 | 38113456  | - | NM_001039220 | AI429214      | + |
| DMM1  | Cdkn2a <sup>-/-</sup> _C57 | SIN.LV.SF.GFP | LIVER  | 8 | 39355025  | - | NM_145841    | Sgcz          | - |
| DMM5  | Cdkn2a <sup>-/-</sup> _C57 | SIN.LV.SF.GFP | LIVER  | 8 | 40243291  | + | NM_030254    | Tusc3         | + |
| DMM1  | Cdkn2a <sup>-/-</sup> _C57 | SIN.LV.SF.GFP | LIVER  | 8 | 40738780  | + | NM_001113326 | Msr1          | - |
| DMM3  | Cdkn2a <sup>-/-</sup> _C57 | SIN.LV.SF.GFP | LIVER  | 8 | 41404787  | - | NM_030610    | Fgf20         | - |
| DMM18 | Cdkn2a <sup>-/-</sup> _C57 | SIN.LV.SF.GFP | SPLEEN | 8 | 41411600  | + | NM_030610    | Fgf20         | - |



|       |                            |               |                |   |          |   |              |         |   |
|-------|----------------------------|---------------|----------------|---|----------|---|--------------|---------|---|
| DMM9  | Cdkn2a <sup>-/-</sup> _C57 | SIN.LV.SF.GFP | SPLEEN         | 8 | 41535893 | - | NM_178395    | Zdhhc2  | + |
| DMM5  | Cdkn2a <sup>-/-</sup> _C57 | SIN.LV.SF.GFP | LIVER          | 8 | 42414492 | + | NM_023662    | Pcm1    | + |
| DMM8  | Cdkn2a <sup>-/-</sup> _C57 | SIN.LV.SF.GFP | SPLEEN         | 8 | 44541772 | + | NM_001009547 | Adam26b | - |
| DMM7  | Cdkn2a <sup>-/-</sup> _C57 | SIN.LV.SF.GFP | LIVER          | 8 | 46802805 | + | NM_172752    | Sorbs2  | + |
| DMM1  | Cdkn2a <sup>-/-</sup> _C57 | SIN.LV.SF.GFP | LIVER          | 8 | 47680569 | - | NM_001001184 | Ccdc111 | - |
| DMM1  | Cdkn2a <sup>-/-</sup> _C57 | SIN.LV.SF.GFP | LIVER          | 8 | 47718013 | + | NM_009810    | Casp3   | + |
| DMM3  | Cdkn2a <sup>-/-</sup> _C57 | SIN.LV.SF.GFP | LIVER          | 8 | 47904818 | + | NM_008391    | Irf2    | + |
| DMM14 | Cdkn2a <sup>-/-</sup> _C57 | SIN.LV.SF.GFP | LIVER          | 8 | 48622998 | - | NM_203507    | Rwdd4a  | + |
| DMM18 | Cdkn2a <sup>-/-</sup> _C57 | SIN.LV.SF.GFP | SPLEEN         | 8 | 51856765 | + | NM_001145937 | Odz3    | - |
| DMM3  | Cdkn2a <sup>-/-</sup> _C57 | SIN.LV.SF.GFP | LIVER          | 8 | 54519405 | - | NM_001005847 | Aga     | + |
| DMM1  | Cdkn2a <sup>-/-</sup> _C57 | SIN.LV.SF.GFP | LIVER          | 8 | 54578130 | - | NM_001005847 | Aga     | + |
| DMM3  | Cdkn2a <sup>-/-</sup> _C57 | SIN.LV.SF.GFP | LIVER          | 8 | 55603154 | - | NM_029701    | Spes3   | - |
| DMM3  | Cdkn2a <sup>-/-</sup> _C57 | SIN.LV.SF.GFP | LIVER          | 8 | 58749400 | + | NM_008278    | Hpgd    | + |
| DMM3  | Cdkn2a <sup>-/-</sup> _C57 | SIN.LV.SF.GFP | LIVER          | 8 | 58861499 | + | NM_008278    | Hpgd    | + |
| DMM1  | Cdkn2a <sup>-/-</sup> _C57 | SIN.LV.SF.GFP | LIVER          | 8 | 59042772 | - | NM_015791    | Fbxo8   | + |
| DMM18 | Cdkn2a <sup>-/-</sup> _C57 | SIN.LV.SF.GFP | SPLEEN         | 8 | 59948605 | - | NM_009136    | Serg1   | + |
| DMM7  | Cdkn2a <sup>-/-</sup> _C57 | SIN.LV.SF.GFP | SPLEEN         | 8 | 62676009 | + | NM_011834    | Aadat   | + |
| DMM14 | Cdkn2a <sup>-/-</sup> _C57 | SIN.LV.SF.GFP | SPLEEN         | 8 | 63401424 | - | NM_007711    | Clcn3   | - |
| DMM1  | Cdkn2a <sup>-/-</sup> _C57 | SIN.LV.SF.GFP | SPLEEN         | 8 | 63419520 | - | NM_173876    | Clcn3   | - |
| DMM5  | Cdkn2a <sup>-/-</sup> _C57 | SIN.LV.SF.GFP | LIVER          | 8 | 63445725 | - | NM_007711    | Clcn3   | - |
| DMM9  | Cdkn2a <sup>-/-</sup> _C57 | SIN.LV.SF.GFP | LIVER - SPLEEN | 8 | 63450845 | + | NM_007711    | Clcn3   | - |
| DMM14 | Cdkn2a <sup>-/-</sup> _C57 | SIN.LV.SF.GFP | LIVER          | 8 | 64035935 | - | NM_001081390 | Palld   | - |
| DMM3  | Cdkn2a <sup>-/-</sup> _C57 | SIN.LV.SF.GFP | LIVER          | 8 | 64047560 | - | NM_001081390 | Palld   | - |
| DMM3  | Cdkn2a <sup>-/-</sup> _C57 | SIN.LV.SF.GFP | LIVER          | 8 | 64421031 | + | NM_001081215 | Ddx60   | + |
| DMM3  | Cdkn2a <sup>-/-</sup> _C57 | SIN.LV.SF.GFP | LIVER          | 8 | 64422767 | - | NM_001081215 | Ddx60   | + |
| DMM9  | Cdkn2a <sup>-/-</sup> _C57 | SIN.LV.SF.GFP | LIVER          | 8 | 64424449 | + | NM_001081215 | Ddx60   | + |
| DMM5  | Cdkn2a <sup>-/-</sup> _C57 | SIN.LV.SF.GFP | LIVER          | 8 | 64429182 | - | NM_001081215 | Ddx60   | + |
| DMM2  | Cdkn2a <sup>-/-</sup> _C57 | SIN.LV.SF.GFP | LIVER          | 8 | 68887573 | + | NM_175188    | 1-Mar   | + |
| DMM14 | Cdkn2a <sup>-/-</sup> _C57 | SIN.LV.SF.GFP | SPLEEN         | 8 | 69394941 | + | NM_010934    | Npy1r   | + |
| DMM3  | Cdkn2a <sup>-/-</sup> _C57 | SIN.LV.SF.GFP | LIVER          | 8 | 70454296 | + | NM_177698    | Psd3    | - |
| DMM1  | Cdkn2a <sup>-/-</sup> _C57 | SIN.LV.SF.GFP | LIVER          | 8 | 71328091 | + | NM_027590    | Ints10  | + |

|       |                            |               |                |   |           |   |              |               |   |
|-------|----------------------------|---------------|----------------|---|-----------|---|--------------|---------------|---|
| DMM9  | Cdkn2a <sup>-/-</sup> _C57 | SIN.LV.SF.GFP | SPLEEN         | 8 | 72099114  | + | NM_001045553 | Zfp868        | - |
| DMM3  | Cdkn2a <sup>-/-</sup> _C57 | SIN.LV.SF.GFP | LIVER          | 8 | 72145923  | - | NM_001045553 | Zfp868        | - |
| DMM1  | Cdkn2a <sup>-/-</sup> _C57 | SIN.LV.SF.GFP | LIVER          | 8 | 74435295  | + | NM_133358    | Zfp617        | + |
| DMM7  | Cdkn2a <sup>-/-</sup> _C57 | SIN.LV.SF.GFP | LIVER          | 8 | 75592297  | + | NM_010687    | Large         | - |
| DMM1  | Cdkn2a <sup>-/-</sup> _C57 | SIN.LV.SF.GFP | LIVER          | 8 | 80080185  | + | NM_001081240 | Prmt10        | + |
| DMM4  | Cdkn2a <sup>-/-</sup> _C57 | SIN.LV.SF.GFP | SPLEEN         | 8 | 80102302  | + | NM_001081240 | Prmt10        | + |
| DMM14 | Cdkn2a <sup>-/-</sup> _C57 | SIN.LV.SF.GFP | SPLEEN         | 8 | 80130500  | + | NM_145599    | Tmem184c      | - |
| DMM1  | Cdkn2a <sup>-/-</sup> _C57 | SIN.LV.SF.GFP | LIVER          | 8 | 83485083  | - | NM_027554    | Usp38         | - |
| DMM1  | Cdkn2a <sup>-/-</sup> _C57 | SIN.LV.SF.GFP | SPLEEN         | 8 | 84295132  | - | NM_001024617 | Inpp4b        | + |
| DMM3  | Cdkn2a <sup>-/-</sup> _C57 | SIN.LV.SF.GFP | LIVER          | 8 | 88391369  | + | NM_199446    | Phkb          | + |
| DMM5  | Cdkn2a <sup>-/-</sup> _C57 | SIN.LV.SF.GFP | LIVER          | 8 | 88447243  | + | NM_199446    | Phkb          | + |
| DMM4  | Cdkn2a <sup>-/-</sup> _C57 | SIN.LV.SF.GFP | LIVER          | 8 | 93640922  | - | NM_011250    | Rbl2          | + |
| DMM14 | Cdkn2a <sup>-/-</sup> _C57 | SIN.LV.SF.GFP | LIVER          | 8 | 96748485  | + | NM_172410    | Nup93         | + |
| DMM14 | Cdkn2a <sup>-/-</sup> _C57 | SIN.LV.SF.GFP | LIVER          | 8 | 98000016  | - | NM_009974    | Csnk2a2       | - |
| DMM1  | Cdkn2a <sup>-/-</sup> _C57 | SIN.LV.SF.GFP | SPLEEN         | 8 | 98287652  | - | NM_153164    | Cnot1         | - |
| DMM3  | Cdkn2a <sup>-/-</sup> _C57 | SIN.LV.SF.GFP | LIVER          | 8 | 101525472 | + | NM_001039154 | Cdh8          | - |
| DMM1  | Cdkn2a <sup>-/-</sup> _C57 | SIN.LV.SF.GFP | LIVER          | 8 | 106891875 | - | NM_153582    | Cmtm4         | - |
| DMM4  | Cdkn2a <sup>-/-</sup> _C57 | SIN.LV.SF.GFP | LIVER          | 8 | 109857276 | + | NM_018823    | Nfat5         | + |
| DMM1  | Cdkn2a <sup>-/-</sup> _C57 | SIN.LV.SF.GFP | LIVER          | 8 | 111540241 | + | NM_007496    | Zfhx3         | + |
| DMM14 | Cdkn2a <sup>-/-</sup> _C57 | SIN.LV.SF.GFP | LIVER          | 8 | 113402079 | - | NM_133973    | Cog4          | + |
| DMM14 | Cdkn2a <sup>-/-</sup> _C57 | SIN.LV.SF.GFP | LIVER          | 8 | 114000306 | + | NM_176923    | Wdr59         | - |
| DMM1  | Cdkn2a <sup>-/-</sup> _C57 | SIN.LV.SF.GFP | LIVER          | 8 | 114097001 | + | NM_133206    | Znrf1         | + |
| DMM3  | Cdkn2a <sup>-/-</sup> _C57 | SIN.LV.SF.GFP | LIVER          | 8 | 116169448 | + | NM_001048145 | 4930481F22Rik | + |
| DMM1  | Cdkn2a <sup>-/-</sup> _C57 | SIN.LV.SF.GFP | LIVER          | 8 | 118212251 | + | NM_001025577 | Maf           | - |
| DMM1  | Cdkn2a <sup>-/-</sup> _C57 | SIN.LV.SF.GFP | LIVER          | 8 | 119104864 | - | NM_029441    | Cdyl2         | - |
| DMM9  | Cdkn2a <sup>-/-</sup> _C57 | SIN.LV.SF.GFP | SPLEEN         | 8 | 121338013 | + | NM_019707    | Cdh13         | + |
| DMM1  | Cdkn2a <sup>-/-</sup> _C57 | SIN.LV.SF.GFP | LIVER          | 8 | 124499460 | + | NM_001110100 | Banp          | + |
| DMM1  | Cdkn2a <sup>-/-</sup> _C57 | SIN.LV.SF.GFP | LIVER          | 8 | 131226366 | + | NM_010578    | Itgb1         | + |
| DMM3  | Cdkn2a <sup>-/-</sup> _C57 | SIN.LV.SF.GFP | LIVER - SPLEEN | 9 | 3000883   | + | NM_026303    | Alkbh8        | + |
| DMM7  | Cdkn2a <sup>-/-</sup> _C57 | SIN.LV.SF.GFP | SPLEEN         | 9 | 3003989   | + | NM_026303    | Alkbh8        | + |
| DMM3  | Cdkn2a <sup>-/-</sup> _C57 | SIN.LV.SF.GFP | LIVER          | 9 | 3015743   | - | NM_026303    | Alkbh8        | + |

|       |                            |               |              |   |          |   |              |               |   |
|-------|----------------------------|---------------|--------------|---|----------|---|--------------|---------------|---|
| DMM7  | Cdkn2a <sup>-/-</sup> _C57 | SIN.LV.SF.GFP | LIVER        | 9 | 3027376  | + | NM_026303    | Alkbh8        | + |
| DMM3  | Cdkn2a <sup>-/-</sup> _C57 | SIN.LV.SF.GFP | LIVER        | 9 | 3030172  | + | NM_026303    | Alkbh8        | + |
| DMM9  | Cdkn2a <sup>-/-</sup> _C57 | SIN.LV.SF.GFP | LIVER        | 9 | 3031136  | - | NM_026303    | Alkbh8        | + |
| DMM1  | Cdkn2a <sup>-/-</sup> _C57 | SIN.LV.SF.GFP | LIVER        | 9 | 3434413  | + | NM_027545    | Cwf19l2       | + |
| DMM18 | Cdkn2a <sup>-/-</sup> _C57 | SIN.LV.SF.GFP | LIVER        | 9 | 4305253  | - | NM_026276    | Aasdhppt      | - |
| DMM3  | Cdkn2a <sup>-/-</sup> _C57 | SIN.LV.SF.GFP | LIVER        | 9 | 4329855  | - | NM_026962    | Kbtbd3        | + |
| DMM14 | Cdkn2a <sup>-/-</sup> _C57 | SIN.LV.SF.GFP | LIVER        | 9 | 7135456  | - | NM_029851    | Dync2h1       | - |
| DMM5  | Cdkn2a <sup>-/-</sup> _C57 | SIN.LV.SF.GFP | LIVER        | 9 | 7202972  | - | NM_029775    | Dcun1d5       | + |
| DMM3  | Cdkn2a <sup>-/-</sup> _C57 | SIN.LV.SF.GFP | LIVER        | 9 | 7346479  | - | NM_008605    | Mmp12         | + |
| DMM5  | Cdkn2a <sup>-/-</sup> _C57 | SIN.LV.SF.GFP | LIVER        | 9 | 7580472  | - | NM_001030289 | Mmp27         | + |
| DMM6  | Cdkn2a <sup>-/-</sup> _C57 | SIN.LV.SF.GFP | LIVER        | 9 | 9230937  | - | NM_027823    | 9030420J04Rik | - |
| DMM9  | Cdkn2a <sup>-/-</sup> _C57 | SIN.LV.SF.GFP | SPLEEN       | 9 | 13259226 | - | NM_001013813 | Maml2         | + |
| DMM3  | Cdkn2a <sup>-/-</sup> _C57 | SIN.LV.SF.GFP | LIVER        | 9 | 13585451 | + | NM_023858    | Mtmt2         | + |
| DMM1  | Cdkn2a <sup>-/-</sup> _C57 | SIN.LV.SF.GFP | LIVER        | 9 | 13588522 | - | NM_023858    | Mtmt2         | + |
| DMM5  | Cdkn2a <sup>-/-</sup> _C57 | SIN.LV.SF.GFP | LIVER        | 9 | 13990171 | + | NM_030261    | Sesn3         | + |
| DMM18 | Cdkn2a <sup>-/-</sup> _C57 | SIN.LV.SF.GFP | SPLEEN       | 9 | 20260116 | - | NM_011753    | Zfp26         | - |
| DMM3  | Cdkn2a <sup>-/-</sup> _C57 | SIN.LV.SF.GFP | LIVER        | 9 | 22168878 | + | NM_028390    | Anln          | - |
| DMM11 | Cdkn2a <sup>-/-</sup> _C57 | SIN.LV.SF.GFP | SPLEEN       | 9 | 22180122 | + | NM_028390    | Anln          | - |
| DMM7  | Cdkn2a <sup>-/-</sup> _C57 | SIN.LV.SF.GFP | SPLEEN       | 9 | 25065252 | + | NM_009859    | 7-Sep         | + |
| DMM3  | Cdkn2a <sup>-/-</sup> _C57 | SIN.LV.SF.GFP | LIVER        | 9 | 25105679 | - | NM_009859    | 7-Sep         | + |
| DMM1  | Cdkn2a <sup>-/-</sup> _C57 | SIN.LV.SF.GFP | LIVER        | 9 | 31952363 | + | NM_177379    | Grit          | + |
| DMM3  | Cdkn2a <sup>-/-</sup> _C57 | SIN.LV.SF.GFP | SPLEEN       | 9 | 32039748 | - | NM_177379    | Grit          | + |
| DMM11 | Cdkn2a <sup>-/-</sup> _C57 | SIN.LV.SF.GFP | - LIVER - SI | 9 | 35113034 | + | NM_028040    | Rpusd4        | + |
| DMM14 | Cdkn2a <sup>-/-</sup> _C57 | SIN.LV.SF.GFP | LIVER        | 9 | 35113041 | - | NM_028040    | Rpusd4        | + |
| DMM9  | Cdkn2a <sup>-/-</sup> _C57 | SIN.LV.SF.GFP | SPLEEN       | 9 | 35113051 | - | NM_028040    | Rpusd4        | + |
| DMM11 | Cdkn2a <sup>-/-</sup> _C57 | SIN.LV.SF.GFP | LIVER        | 9 | 35113061 | - | NM_028040    | Rpusd4        | + |
| DMM11 | Cdkn2a <sup>-/-</sup> _C57 | SIN.LV.SF.GFP | - LIVER - SI | 9 | 35113067 | - | NM_028040    | Rpusd4        | + |
| DMM3  | Cdkn2a <sup>-/-</sup> _C57 | SIN.LV.SF.GFP | LIVER        | 9 | 37021008 | - | NM_025464    | Tmem218       | + |
| DMM2  | Cdkn2a <sup>-/-</sup> _C57 | SIN.LV.SF.GFP | SPLEEN       | 9 | 37325255 | + | NM_146222    | BC024479      | + |
| DMM14 | Cdkn2a <sup>-/-</sup> _C57 | SIN.LV.SF.GFP | SPLEEN       | 9 | 38547086 | + | NM_001145957 | Vwa5a         | + |
| DMM14 | Cdkn2a <sup>-/-</sup> _C57 | SIN.LV.SF.GFP | LIVER        | 9 | 40014987 | - | NM_030713    | Zfp202        | + |

|       |                            |               |              |   |          |   |              |               |   |
|-------|----------------------------|---------------|--------------|---|----------|---|--------------|---------------|---|
| DMM11 | Cdkn2a <sup>-/-</sup> _C57 | SIN.LV.SF.GFP | - LIVER - SI | 9 | 40342094 | + | NM_172768    | Gramd1b       | - |
| DMM11 | Cdkn2a <sup>-/-</sup> _C57 | SIN.LV.SF.GFP | LIVER        | 9 | 40342171 | + | NM_172768    | Gramd1b       | - |
| DMM11 | Cdkn2a <sup>-/-</sup> _C57 | SIN.LV.SF.GFP | LIVER        | 9 | 40342194 | - | NM_172768    | Gramd1b       | - |
| DMM11 | Cdkn2a <sup>-/-</sup> _C57 | SIN.LV.SF.GFP | LIVER        | 9 | 40342309 | - | NM_172768    | Gramd1b       | - |
| DMM1  | Cdkn2a <sup>-/-</sup> _C57 | SIN.LV.SF.GFP | LIVER        | 9 | 44623811 | - | NM_001081049 | Mill1         | - |
| DMM1  | Cdkn2a <sup>-/-</sup> _C57 | SIN.LV.SF.GFP | LIVER        | 9 | 44749422 | + | NM_145400    | Ube4a         | - |
| DMM3  | Cdkn2a <sup>-/-</sup> _C57 | SIN.LV.SF.GFP | LIVER        | 9 | 47477628 | + | NM_001025600 | Cadm1         | + |
| DMM9  | Cdkn2a <sup>-/-</sup> _C57 | SIN.LV.SF.GFP | SPLEEN       | 9 | 50339261 | - | NM_133217    | Bco2          | - |
| DMM5  | Cdkn2a <sup>-/-</sup> _C57 | SIN.LV.SF.GFP | LIVER        | 9 | 50607626 | + | NM_133981    | Alg9          | + |
| DMM5  | Cdkn2a <sup>-/-</sup> _C57 | SIN.LV.SF.GFP | LIVER        | 9 | 50802476 | - | NM_178710    | Sik2          | - |
| DMM2  | Cdkn2a <sup>-/-</sup> _C57 | SIN.LV.SF.GFP | LIVER        | 9 | 51869269 | - | NM_001104617 | Rdx           | + |
| DMM1  | Cdkn2a <sup>-/-</sup> _C57 | SIN.LV.SF.GFP | LIVER        | 9 | 52964041 | + | NM_029936    | Ddx10         | - |
| DMM14 | Cdkn2a <sup>-/-</sup> _C57 | SIN.LV.SF.GFP | LIVER        | 9 | 53357903 | - | NM_001081152 | Npat          | + |
| DMM5  | Cdkn2a <sup>-/-</sup> _C57 | SIN.LV.SF.GFP | LIVER        | 9 | 53448426 | - | NM_001161618 | Cul5          | - |
| DMM5  | Cdkn2a <sup>-/-</sup> _C57 | SIN.LV.SF.GFP | LIVER        | 9 | 55007149 | - | NM_180600    | Ube2q2        | + |
| DMM14 | Cdkn2a <sup>-/-</sup> _C57 | SIN.LV.SF.GFP | LIVER        | 9 | 55044460 | + | NM_180600    | Ube2q2        | + |
| DMM5  | Cdkn2a <sup>-/-</sup> _C57 | SIN.LV.SF.GFP | LIVER        | 9 | 56163329 | + | NM_172924    | C230081A13Rik | - |
| DMM1  | Cdkn2a <sup>-/-</sup> _C57 | SIN.LV.SF.GFP | LIVER        | 9 | 59248931 | - | NM_019927    | Arih1         | - |
| DMM3  | Cdkn2a <sup>-/-</sup> _C57 | SIN.LV.SF.GFP | LIVER        | 9 | 59279519 | - | NM_019927    | Arih1         | - |
| DMM3  | Cdkn2a <sup>-/-</sup> _C57 | SIN.LV.SF.GFP | LIVER        | 9 | 62737813 | - | NM_019663    | Pias1         | - |
| DMM3  | Cdkn2a <sup>-/-</sup> _C57 | SIN.LV.SF.GFP | LIVER        | 9 | 66269074 | - | NM_175206    | Fbxl22        | - |
| DMM11 | Cdkn2a <sup>-/-</sup> _C57 | SIN.LV.SF.GFP | LIVER        | 9 | 68543157 | + | NM_013646    | Rora          | + |
| DMM1  | Cdkn2a <sup>-/-</sup> _C57 | SIN.LV.SF.GFP | LIVER        | 9 | 68595453 | - | NM_013646    | Rora          | + |
| DMM1  | Cdkn2a <sup>-/-</sup> _C57 | SIN.LV.SF.GFP | LIVER        | 9 | 69235963 | + | NM_013646    | Rora          | + |
| DMM3  | Cdkn2a <sup>-/-</sup> _C57 | SIN.LV.SF.GFP | LIVER        | 9 | 69851848 | - | NM_001008238 | Bnip2         | + |
| DMM14 | Cdkn2a <sup>-/-</sup> _C57 | SIN.LV.SF.GFP | LIVER        | 9 | 70575227 | + | NM_007399    | Adam10        | + |
| DMM1  | Cdkn2a <sup>-/-</sup> _C57 | SIN.LV.SF.GFP | LIVER        | 9 | 72576278 | - | NM_010890    | Nedd4         | + |
| DMM14 | Cdkn2a <sup>-/-</sup> _C57 | SIN.LV.SF.GFP | LIVER        | 9 | 72871351 | + | NM_018889    | Pigb          | - |
| DMM7  | Cdkn2a <sup>-/-</sup> _C57 | SIN.LV.SF.GFP | SPLEEN       | 9 | 73628346 | + | NM_001081153 | Unc13c        | - |
| DMM1  | Cdkn2a <sup>-/-</sup> _C57 | SIN.LV.SF.GFP | SPLEEN       | 9 | 75388903 | - | NM_016963    | Tmod3         | - |
| DMM1  | Cdkn2a <sup>-/-</sup> _C57 | SIN.LV.SF.GFP | LIVER        | 9 | 77947892 | - | NM_023605    | Fbxo9         | - |

|       |                            |               |        |   |           |   |              |               |   |
|-------|----------------------------|---------------|--------|---|-----------|---|--------------|---------------|---|
| DMM5  | Cdkn2a <sup>-/-</sup> _C57 | SIN.LV.SF.GFP | LIVER  | 9 | 78287759  | - | NM_173386    | E330016A19Rik | - |
| DMM7  | Cdkn2a <sup>-/-</sup> _C57 | SIN.LV.SF.GFP | LIVER  | 9 | 79042119  | - | NM_007730    | Col12a1       | - |
| DMM18 | Cdkn2a <sup>-/-</sup> _C57 | SIN.LV.SF.GFP | SPLEEN | 9 | 79616983  | - | NM_133718    | Tmem30a       | - |
| DMM5  | Cdkn2a <sup>-/-</sup> _C57 | SIN.LV.SF.GFP | LIVER  | 9 | 79642388  | + | NM_133718    | Tmem30a       | - |
| DMM9  | Cdkn2a <sup>-/-</sup> _C57 | SIN.LV.SF.GFP | LIVER  | 9 | 79707594  | - | NM_001081243 | Filip1        | - |
| DMM3  | Cdkn2a <sup>-/-</sup> _C57 | SIN.LV.SF.GFP | LIVER  | 9 | 79981729  | + | NM_146003    | Senp6         | + |
| DMM14 | Cdkn2a <sup>-/-</sup> _C57 | SIN.LV.SF.GFP | LIVER  | 9 | 82164710  | - | NM_175213    | 4930486G11Rik | + |
| DMM1  | Cdkn2a <sup>-/-</sup> _C57 | SIN.LV.SF.GFP | SPLEEN | 9 | 82843428  | + | NM_001081216 | Phip          | - |
| DMM1  | Cdkn2a <sup>-/-</sup> _C57 | SIN.LV.SF.GFP | LIVER  | 9 | 82857157  | + | NM_001081216 | Phip          | - |
| DMM7  | Cdkn2a <sup>-/-</sup> _C57 | SIN.LV.SF.GFP | LIVER  | 9 | 83179674  | - | NM_029434    | Lca5          | - |
| DMM14 | Cdkn2a <sup>-/-</sup> _C57 | SIN.LV.SF.GFP | LIVER  | 9 | 83447791  | - | NM_172507    | Sh3bgrl2      | + |
| DMM14 | Cdkn2a <sup>-/-</sup> _C57 | SIN.LV.SF.GFP | LIVER  | 9 | 83496890  | - | NM_172507    | Sh3bgrl2      | + |
| DMM14 | Cdkn2a <sup>-/-</sup> _C57 | SIN.LV.SF.GFP | LIVER  | 9 | 85013877  | + | NM_001160378 | Fam46a        | - |
| DMM2  | Cdkn2a <sup>-/-</sup> _C57 | SIN.LV.SF.GFP | LIVER  | 9 | 85593587  | - | NM_001081282 | Ibtk          | - |
| DMM14 | Cdkn2a <sup>-/-</sup> _C57 | SIN.LV.SF.GFP | LIVER  | 9 | 86388170  | + | NM_177208    | Dopey1        | + |
| DMM5  | Cdkn2a <sup>-/-</sup> _C57 | SIN.LV.SF.GFP | LIVER  | 9 | 88277061  | + | NM_172926    | Snx14         | - |
| DMM3  | Cdkn2a <sup>-/-</sup> _C57 | SIN.LV.SF.GFP | LIVER  | 9 | 88357693  | - | NM_019666    | Syncrip       | - |
| DMM5  | Cdkn2a <sup>-/-</sup> _C57 | SIN.LV.SF.GFP | LIVER  | 9 | 96209652  | - | NM_178667    | Tfdp2         | + |
| DMM5  | Cdkn2a <sup>-/-</sup> _C57 | SIN.LV.SF.GFP | LIVER  | 9 | 97004251  | + | NM_138756    | Slc25a36      | - |
| DMM7  | Cdkn2a <sup>-/-</sup> _C57 | SIN.LV.SF.GFP | LIVER  | 9 | 98375072  | - | NM_009034    | Rbp2          | + |
| DMM1  | Cdkn2a <sup>-/-</sup> _C57 | SIN.LV.SF.GFP | LIVER  | 9 | 100676517 | + | NM_009282    | Stag1         | + |
| DMM9  | Cdkn2a <sup>-/-</sup> _C57 | SIN.LV.SF.GFP | SPLEEN | 9 | 100695160 | - | NM_009282    | Stag1         | + |
| DMM14 | Cdkn2a <sup>-/-</sup> _C57 | SIN.LV.SF.GFP | LIVER  | 9 | 103912858 | - | NM_172460    | Nphp3         | + |
| DMM14 | Cdkn2a <sup>-/-</sup> _C57 | SIN.LV.SF.GFP | LIVER  | 9 | 105411745 | + | NM_175025    | Atp2c1        | - |
| DMM8  | Cdkn2a <sup>-/-</sup> _C57 | SIN.LV.SF.GFP | SPLEEN | 9 | 108636287 | - | NM_008924    | Prkar2a       | + |
| DMM1  | Cdkn2a <sup>-/-</sup> _C57 | SIN.LV.SF.GFP | LIVER  | 9 | 109868608 | + | NM_008633    | Mtap4         | + |
| DMM5  | Cdkn2a <sup>-/-</sup> _C57 | SIN.LV.SF.GFP | LIVER  | 9 | 114973779 | - | NM_148958    | Osbpl10       | + |
| DMM1  | Cdkn2a <sup>-/-</sup> _C57 | SIN.LV.SF.GFP | LIVER  | 9 | 115202071 | + | NM_024222    | Stt3b         | - |
| DMM7  | Cdkn2a <sup>-/-</sup> _C57 | SIN.LV.SF.GFP | SPLEEN | 9 | 115207435 | + | NM_024222    | Stt3b         | - |
| DMM3  | Cdkn2a <sup>-/-</sup> _C57 | SIN.LV.SF.GFP | LIVER  | 9 | 115394831 | - | NM_024222    | Stt3b         | - |
| DMM18 | Cdkn2a <sup>-/-</sup> _C57 | SIN.LV.SF.GFP | SPLEEN | 9 | 117966247 | + | NM_001048146 | Azi2          | + |

|       |                            |               |        |    |          |   |              |               |   |
|-------|----------------------------|---------------|--------|----|----------|---|--------------|---------------|---|
| DMM3  | Cdkn2a <sup>-/-</sup> _C57 | SIN.LV.SF.GFP | LIVER  | 10 | 3112527  | + | NM_172546    | Cnksr3        | + |
| DMM14 | Cdkn2a <sup>-/-</sup> _C57 | SIN.LV.SF.GFP | SPLEEN | 10 | 7405720  | + | NM_010690    | Lats1         | + |
| DMM9  | Cdkn2a <sup>-/-</sup> _C57 | SIN.LV.SF.GFP | LIVER  | 10 | 8230235  | - | NM_177387    | Ust           | - |
| DMM5  | Cdkn2a <sup>-/-</sup> _C57 | SIN.LV.SF.GFP | LIVER  | 10 | 9488337  | - | NM_001081344 | Stxbp5        | - |
| DMM14 | Cdkn2a <sup>-/-</sup> _C57 | SIN.LV.SF.GFP | LIVER  | 10 | 10142989 | + | NM_001127353 | 9130014G24Rik | - |
| DMM5  | Cdkn2a <sup>-/-</sup> _C57 | SIN.LV.SF.GFP | LIVER  | 10 | 11022931 | - | NM_027968    | Fbxo30        | + |
| DMM3  | Cdkn2a <sup>-/-</sup> _C57 | SIN.LV.SF.GFP | LIVER  | 10 | 12123602 | - | NM_011682    | Utrn          | - |
| DMM1  | Cdkn2a <sup>-/-</sup> _C57 | SIN.LV.SF.GFP | LIVER  | 10 | 13827996 | - | NM_010437    | Hivep2        | + |
| DMM5  | Cdkn2a <sup>-/-</sup> _C57 | SIN.LV.SF.GFP | LIVER  | 10 | 17648613 | - | NM_001033432 | Heca          | - |
| DMM14 | Cdkn2a <sup>-/-</sup> _C57 | SIN.LV.SF.GFP | LIVER  | 10 | 17781187 | + | NM_001111065 | Reps1         | + |
| DMM1  | Cdkn2a <sup>-/-</sup> _C57 | SIN.LV.SF.GFP | LIVER  | 10 | 18738881 | - | NM_009397    | Tnfaip3       | - |
| DMM4  | Cdkn2a <sup>-/-</sup> _C57 | SIN.LV.SF.GFP | SPLEEN | 10 | 20220999 | + | NM_013875    | Pde7b         | - |
| DMM3  | Cdkn2a <sup>-/-</sup> _C57 | SIN.LV.SF.GFP | LIVER  | 10 | 25104306 | - | NM_013511    | Epb4.1l2      | + |
| DMM3  | Cdkn2a <sup>-/-</sup> _C57 | SIN.LV.SF.GFP | LIVER  | 10 | 25175878 | - | NM_013511    | Epb4.1l2      | + |
| DMM7  | Cdkn2a <sup>-/-</sup> _C57 | SIN.LV.SF.GFP | SPLEEN | 10 | 25213717 | - | NM_013511    | Epb4.1l2      | + |
| DMM1  | Cdkn2a <sup>-/-</sup> _C57 | SIN.LV.SF.GFP | LIVER  | 10 | 25215494 | - | NM_013511    | Epb4.1l2      | + |
| DMM1  | Cdkn2a <sup>-/-</sup> _C57 | SIN.LV.SF.GFP | LIVER  | 10 | 26034643 | + | NM_172787    | L3mbt3        | - |
| DMM18 | Cdkn2a <sup>-/-</sup> _C57 | SIN.LV.SF.GFP | LIVER  | 10 | 26546515 | - | NM_176837    | Arhgap18      | + |
| DMM1  | Cdkn2a <sup>-/-</sup> _C57 | SIN.LV.SF.GFP | LIVER  | 10 | 26579435 | + | NM_176837    | Arhgap18      | + |
| DMM1  | Cdkn2a <sup>-/-</sup> _C57 | SIN.LV.SF.GFP | LIVER  | 10 | 26925035 | + | NM_008481    | Lama2         | - |
| DMM14 | Cdkn2a <sup>-/-</sup> _C57 | SIN.LV.SF.GFP | LIVER  | 10 | 28048481 | - | NM_008983    | Ptprk         | + |
| DMM8  | Cdkn2a <sup>-/-</sup> _C57 | SIN.LV.SF.GFP | SPLEEN | 10 | 28894851 | + | NM_026138    | 6330407J23Rik | + |
| DMM3  | Cdkn2a <sup>-/-</sup> _C57 | SIN.LV.SF.GFP | LIVER  | 10 | 30313946 | + | NM_028604    | Trmt11        | - |
| DMM14 | Cdkn2a <sup>-/-</sup> _C57 | SIN.LV.SF.GFP | LIVER  | 10 | 30431572 | + | NM_172495    | Ncoa7         | - |
| DMM5  | Cdkn2a <sup>-/-</sup> _C57 | SIN.LV.SF.GFP | LIVER  | 10 | 33873378 | + | NM_172508    | Dse           | - |
| DMM3  | Cdkn2a <sup>-/-</sup> _C57 | SIN.LV.SF.GFP | LIVER  | 10 | 34010543 | - | NM_009433    | Tspyl1        | + |
| DMM3  | Cdkn2a <sup>-/-</sup> _C57 | SIN.LV.SF.GFP | LIVER  | 10 | 34052313 | - | NM_176968    | Nt5dc1        | - |
| DMM1  | Cdkn2a <sup>-/-</sup> _C57 | SIN.LV.SF.GFP | LIVER  | 10 | 34256217 | - | NM_001159544 | Frk           | + |
| DMM9  | Cdkn2a <sup>-/-</sup> _C57 | SIN.LV.SF.GFP | LIVER  | 10 | 37255207 | + | NM_008538    | Marcks        | - |
| DMM14 | Cdkn2a <sup>-/-</sup> _C57 | SIN.LV.SF.GFP | LIVER  | 10 | 37344302 | + | NM_008538    | Marcks        | - |
| DMM1  | Cdkn2a <sup>-/-</sup> _C57 | SIN.LV.SF.GFP | LIVER  | 10 | 37400185 | + | NM_008538    | Marcks        | - |

|       |                            |               |                |    |          |   |              |               |   |
|-------|----------------------------|---------------|----------------|----|----------|---|--------------|---------------|---|
| DMM3  | Cdkn2a <sup>-/-</sup> _C57 | SIN.LV.SF.GFP | LIVER          | 10 | 38798863 | + | NM_010681    | Lama4         | + |
| DMM5  | Cdkn2a <sup>-/-</sup> _C57 | SIN.LV.SF.GFP | LIVER          | 10 | 39429894 | - | NM_011264    | Rev3l         | + |
| DMM12 | Cdkn2a <sup>-/-</sup> _C57 | SIN.LV.SF.GFP | LIVER - SPLEEN | 10 | 39516686 | + | NM_011264    | Rev3l         | + |
| DMM5  | Cdkn2a <sup>-/-</sup> _C57 | SIN.LV.SF.GFP | LIVER          | 10 | 40118215 | + | NM_198164    | Cdc2l6        | + |
| DMM14 | Cdkn2a <sup>-/-</sup> _C57 | SIN.LV.SF.GFP | LIVER          | 10 | 40194328 | + | NM_198164    | Cdc2l6        | + |
| DMM1  | Cdkn2a <sup>-/-</sup> _C57 | SIN.LV.SF.GFP | LIVER          | 10 | 41457176 | + | NM_026643    | 2410017P07Rik | - |
| DMM3  | Cdkn2a <sup>-/-</sup> _C57 | SIN.LV.SF.GFP | LIVER          | 10 | 41510655 | - | NM_026643    | 2410017P07Rik | - |
| DMM5  | Cdkn2a <sup>-/-</sup> _C57 | SIN.LV.SF.GFP | LIVER          | 10 | 43739136 | + | NM_172393    | Aim1          | - |
| DMM5  | Cdkn2a <sup>-/-</sup> _C57 | SIN.LV.SF.GFP | LIVER          | 10 | 44278474 | - | NM_007548    | Prdm1         | - |
| DMM14 | Cdkn2a <sup>-/-</sup> _C57 | SIN.LV.SF.GFP | LIVER          | 10 | 45329039 | + | NM_172473    | Hace1         | + |
| DMM14 | Cdkn2a <sup>-/-</sup> _C57 | SIN.LV.SF.GFP | LIVER          | 10 | 45431709 | + | NM_172473    | Hace1         | + |
| DMM18 | Cdkn2a <sup>-/-</sup> _C57 | SIN.LV.SF.GFP | SPLEEN         | 10 | 50348559 | + | NM_001146089 | Ascc3         | + |
| DMM14 | Cdkn2a <sup>-/-</sup> _C57 | SIN.LV.SF.GFP | LIVER          | 10 | 50359253 | + | NM_001146089 | Ascc3         | + |
| DMM4  | Cdkn2a <sup>-/-</sup> _C57 | SIN.LV.SF.GFP | SPLEEN         | 10 | 50369344 | + | NM_001146089 | Ascc3         | + |
| DMM1  | Cdkn2a <sup>-/-</sup> _C57 | SIN.LV.SF.GFP | LIVER          | 10 | 50370363 | - | NM_001146089 | Ascc3         | + |
| DMM5  | Cdkn2a <sup>-/-</sup> _C57 | SIN.LV.SF.GFP | LIVER          | 10 | 50383371 | + | NM_001146089 | Ascc3         | + |
| DMM5  | Cdkn2a <sup>-/-</sup> _C57 | SIN.LV.SF.GFP | LIVER          | 10 | 50433789 | + | NM_001146089 | Ascc3         | + |
| DMM8  | Cdkn2a <sup>-/-</sup> _C57 | SIN.LV.SF.GFP | LIVER          | 10 | 50456292 | + | NM_001146089 | Ascc3         | + |
| DMM1  | Cdkn2a <sup>-/-</sup> _C57 | SIN.LV.SF.GFP | LIVER          | 10 | 50512628 | + | NM_001146089 | Ascc3         | + |
| DMM5  | Cdkn2a <sup>-/-</sup> _C57 | SIN.LV.SF.GFP | LIVER          | 10 | 53072426 | - | NM_001141927 | Pln           | + |
| DMM9  | Cdkn2a <sup>-/-</sup> _C57 | SIN.LV.SF.GFP | SPLEEN         | 10 | 53676527 | - | NM_008548    | Man1a         | - |
| DMM8  | Cdkn2a <sup>-/-</sup> _C57 | SIN.LV.SF.GFP | LIVER          | 10 | 56105360 | + | NM_010288    | Gja1          | + |
| DMM14 | Cdkn2a <sup>-/-</sup> _C57 | SIN.LV.SF.GFP | LIVER          | 10 | 56510631 | - | NM_010288    | Gja1          | + |
| DMM1  | Cdkn2a <sup>-/-</sup> _C57 | SIN.LV.SF.GFP | LIVER          | 10 | 57380424 | + | NM_001039050 | Pkib          | + |
| DMM1  | Cdkn2a <sup>-/-</sup> _C57 | SIN.LV.SF.GFP | SPLEEN         | 10 | 57385918 | + | NM_001039050 | Pkib          | + |
| DMM1  | Cdkn2a <sup>-/-</sup> _C57 | SIN.LV.SF.GFP | LIVER          | 10 | 57529601 | + | NM_020561    | Smpd13a       | + |
| DMM1  | Cdkn2a <sup>-/-</sup> _C57 | SIN.LV.SF.GFP | LIVER          | 10 | 57795325 | - | NM_026148    | Lims1         | + |
| DMM18 | Cdkn2a <sup>-/-</sup> _C57 | SIN.LV.SF.GFP | SPLEEN         | 10 | 57795330 | + | NM_026148    | Lims1         | + |
| DMM5  | Cdkn2a <sup>-/-</sup> _C57 | SIN.LV.SF.GFP | LIVER          | 10 | 58663361 | + | NM_001024910 | 10-Sep        | - |
| DMM2  | Cdkn2a <sup>-/-</sup> _C57 | SIN.LV.SF.GFP | LIVER          | 10 | 66474282 | + | NM_178606    | Reep3         | - |
| DMM2  | Cdkn2a <sup>-/-</sup> _C57 | SIN.LV.SF.GFP | LIVER          | 10 | 66624681 | + | NM_207221    | Jmjd1c        | + |

|       |                            |               |        |    |           |   |              |               |   |
|-------|----------------------------|---------------|--------|----|-----------|---|--------------|---------------|---|
| DMM4  | Cdkn2a <sup>-/-</sup> _C57 | SIN.LV.SF.GFP | SPLEEN | 10 | 66671607  | - | NM_207221    | Jmjd1c        | + |
| DMM1  | Cdkn2a <sup>-/-</sup> _C57 | SIN.LV.SF.GFP | LIVER  | 10 | 67575816  | + | NM_023598    | Arid5b        | - |
| DMM1  | Cdkn2a <sup>-/-</sup> _C57 | SIN.LV.SF.GFP | LIVER  | 10 | 67837116  | - | NM_028491    | 1700040L02Rik | - |
| DMM14 | Cdkn2a <sup>-/-</sup> _C57 | SIN.LV.SF.GFP | LIVER  | 10 | 68745323  | + | NM_001081347 | Rhobtb1       | + |
| DMM2  | Cdkn2a <sup>-/-</sup> _C57 | SIN.LV.SF.GFP | LIVER  | 10 | 69565703  | - | NM_001111121 | Ccdc6         | + |
| DMM18 | Cdkn2a <sup>-/-</sup> _C57 | SIN.LV.SF.GFP | SPLEEN | 10 | 76510558  | + | NM_031196    | Slc19a1       | + |
| DMM12 | Cdkn2a <sup>-/-</sup> _C57 | SIN.LV.SF.GFP | SPLEEN | 10 | 82222558  | + | NM_010914    | Nfyb          | - |
| DMM9  | Cdkn2a <sup>-/-</sup> _C57 | SIN.LV.SF.GFP | LIVER  | 10 | 86360378  | + | NM_138673    | Stab2         | - |
| DMM14 | Cdkn2a <sup>-/-</sup> _C57 | SIN.LV.SF.GFP | LIVER  | 10 | 89107328  | - | NM_198021    | Scyl2         | - |
| DMM1  | Cdkn2a <sup>-/-</sup> _C57 | SIN.LV.SF.GFP | LIVER  | 10 | 89141477  | - | NM_198021    | Scyl2         | - |
| DMM5  | Cdkn2a <sup>-/-</sup> _C57 | SIN.LV.SF.GFP | LIVER  | 10 | 89147391  | + | NM_198021    | Scyl2         | - |
| DMM18 | Cdkn2a <sup>-/-</sup> _C57 | SIN.LV.SF.GFP | SPLEEN | 10 | 89279782  | - | NM_029166    | Uhrf1bp1l     | + |
| DMM1  | Cdkn2a <sup>-/-</sup> _C57 | SIN.LV.SF.GFP | LIVER  | 10 | 90535824  | - | NM_001042558 | Apaf1         | - |
| DMM3  | Cdkn2a <sup>-/-</sup> _C57 | SIN.LV.SF.GFP | LIVER  | 10 | 91608414  | - | NM_008682    | Nedd1         | - |
| DMM5  | Cdkn2a <sup>-/-</sup> _C57 | SIN.LV.SF.GFP | LIVER  | 10 | 92175225  | + | NM_008682    | Nedd1         | - |
| DMM5  | Cdkn2a <sup>-/-</sup> _C57 | SIN.LV.SF.GFP | LIVER  | 10 | 92628853  | + | NM_146239    | Pctk2         | + |
| DMM1  | Cdkn2a <sup>-/-</sup> _C57 | SIN.LV.SF.GFP | LIVER  | 10 | 92649142  | + | NM_146239    | Pctk2         | + |
| DMM1  | Cdkn2a <sup>-/-</sup> _C57 | SIN.LV.SF.GFP | LIVER  | 10 | 94023701  | + | NM_172051    | Tmcc3         | + |
| DMM5  | Cdkn2a <sup>-/-</sup> _C57 | SIN.LV.SF.GFP | LIVER  | 10 | 96023512  | + | NM_007569    | Btg1          | + |
| DMM1  | Cdkn2a <sup>-/-</sup> _C57 | SIN.LV.SF.GFP | LIVER  | 10 | 99926204  | - | NM_001033332 | Tmtc3         | - |
| DMM1  | Cdkn2a <sup>-/-</sup> _C57 | SIN.LV.SF.GFP | LIVER  | 10 | 99951301  | - | NM_146009    | Cep290        | + |
| DMM2  | Cdkn2a <sup>-/-</sup> _C57 | SIN.LV.SF.GFP | SPLEEN | 10 | 100002674 | + | NM_146009    | Cep290        | + |
| DMM4  | Cdkn2a <sup>-/-</sup> _C57 | SIN.LV.SF.GFP | LIVER  | 10 | 100004725 | - | NM_146009    | Cep290        | + |
| DMM9  | Cdkn2a <sup>-/-</sup> _C57 | SIN.LV.SF.GFP | LIVER  | 10 | 100354450 | + | NM_001081246 | 1700017N19Rik | + |
| DMM14 | Cdkn2a <sup>-/-</sup> _C57 | SIN.LV.SF.GFP | LIVER  | 10 | 100400675 | + | NM_001081246 | 1700017N19Rik | + |
| DMM1  | Cdkn2a <sup>-/-</sup> _C57 | SIN.LV.SF.GFP | LIVER  | 10 | 100586106 | - | NM_001081246 | 1700017N19Rik | + |
| DMM7  | Cdkn2a <sup>-/-</sup> _C57 | SIN.LV.SF.GFP | LIVER  | 10 | 101052202 | - | NM_026243    | Mgat4c        | + |
| DMM2  | Cdkn2a <sup>-/-</sup> _C57 | SIN.LV.SF.GFP | LIVER  | 10 | 105216426 | - | NM_207522    | BC067068      | - |
| DMM18 | Cdkn2a <sup>-/-</sup> _C57 | SIN.LV.SF.GFP | SPLEEN | 10 | 107309794 | + | NM_001081432 | Ptprq         | - |
| DMM14 | Cdkn2a <sup>-/-</sup> _C57 | SIN.LV.SF.GFP | LIVER  | 10 | 107608178 | + | NM_027892    | Ppp1r12a      | + |
| DMM3  | Cdkn2a <sup>-/-</sup> _C57 | SIN.LV.SF.GFP | SPLEEN | 10 | 107621909 | - | NM_027892    | Ppp1r12a      | + |



|       |                            |               |              |    |           |   |              |          |   |
|-------|----------------------------|---------------|--------------|----|-----------|---|--------------|----------|---|
| DMM14 | Cdkn2a <sup>-/-</sup> _C57 | SIN.LV.SF.GFP | LIVER        | 10 | 110380711 | + | NM_172554    | Zdhhc17  | - |
| DMM1  | Cdkn2a <sup>-/-</sup> _C57 | SIN.LV.SF.GFP | LIVER        | 10 | 110650779 | + | NM_001003717 | Osbp18   | + |
| DMM1  | Cdkn2a <sup>-/-</sup> _C57 | SIN.LV.SF.GFP | LIVER        | 10 | 110683948 | - | NM_001003717 | Osbp18   | + |
| DMM14 | Cdkn2a <sup>-/-</sup> _C57 | SIN.LV.SF.GFP | LIVER        | 10 | 110913286 | + | NM_015781    | Nap111   | + |
| DMM9  | Cdkn2a <sup>-/-</sup> _C57 | SIN.LV.SF.GFP | SPLEEN       | 10 | 111126052 | - | NM_009344    | Phlda1   | + |
| DMM1  | Cdkn2a <sup>-/-</sup> _C57 | SIN.LV.SF.GFP | LIVER        | 10 | 114814297 | + | NM_025780    | Thap2    | - |
| DMM14 | Cdkn2a <sup>-/-</sup> _C57 | SIN.LV.SF.GFP | LIVER        | 10 | 115932492 | - | NM_001037846 | Cnot2    | - |
| DMM3  | Cdkn2a <sup>-/-</sup> _C57 | SIN.LV.SF.GFP | LIVER        | 10 | 115987587 | - | NM_001037846 | Cnot2    | - |
| DMM3  | Cdkn2a <sup>-/-</sup> _C57 | SIN.LV.SF.GFP | LIVER        | 10 | 116132867 | + | NM_001033333 | Gm239    | - |
| DMM18 | Cdkn2a <sup>-/-</sup> _C57 | SIN.LV.SF.GFP | SPLEEN       | 10 | 116161681 | - | NM_001033333 | Gm239    | - |
| DMM9  | Cdkn2a <sup>-/-</sup> _C57 | SIN.LV.SF.GFP | LIVER        | 10 | 116566015 | + | NM_177798    | Frs2     | - |
| DMM9  | Cdkn2a <sup>-/-</sup> _C57 | SIN.LV.SF.GFP | LIVER        | 10 | 116566073 | - | NM_177798    | Frs2     | - |
| DMM7  | Cdkn2a <sup>-/-</sup> _C57 | SIN.LV.SF.GFP | VER - SPLEEN | 10 | 116793019 | - | NM_001013391 | Cpsf6    | - |
| DMM3  | Cdkn2a <sup>-/-</sup> _C57 | SIN.LV.SF.GFP | LIVER        | 10 | 116793573 | + | NM_001013391 | Cpsf6    | - |
| DMM9  | Cdkn2a <sup>-/-</sup> _C57 | SIN.LV.SF.GFP | SPLEEN       | 10 | 117350406 | - | NM_024457    | Rap1b    | - |
| DMM18 | Cdkn2a <sup>-/-</sup> _C57 | SIN.LV.SF.GFP | SPLEEN       | 10 | 119628607 | - | NM_028679    | Irak3    | - |
| DMM1  | Cdkn2a <sup>-/-</sup> _C57 | SIN.LV.SF.GFP | LIVER        | 10 | 120391953 | - | NM_001081193 | Lemd3    | - |
| DMM3  | Cdkn2a <sup>-/-</sup> _C57 | SIN.LV.SF.GFP | LIVER        | 10 | 122568631 | + | NM_027604    | Usp15    | - |
| DMM3  | Cdkn2a <sup>-/-</sup> _C57 | SIN.LV.SF.GFP | LIVER        | 10 | 124747704 | - | NM_011391    | Slc16a7  | - |
| DMM1  | Cdkn2a <sup>-/-</sup> _C57 | SIN.LV.SF.GFP | LIVER        | 10 | 124792617 | + | NM_011391    | Slc16a7  | - |
| DMM5  | Cdkn2a <sup>-/-</sup> _C57 | SIN.LV.SF.GFP | LIVER        | 10 | 126294657 | - | NM_026858    | Xrcc6bp1 | - |
| DMM5  | Cdkn2a <sup>-/-</sup> _C57 | SIN.LV.SF.GFP | LIVER        | 10 | 128352398 | + | NM_134006    | Rdh5     | - |
| DMM14 | Cdkn2a <sup>-/-</sup> _C57 | SIN.LV.SF.GFP | LIVER        | 11 | 3046214   | + | NM_030207    | Sfi1     | - |
| DMM7  | Cdkn2a <sup>-/-</sup> _C57 | SIN.LV.SF.GFP | LIVER        | 11 | 3054924   | + | NM_030207    | Sfi1     | - |
| DMM14 | Cdkn2a <sup>-/-</sup> _C57 | SIN.LV.SF.GFP | LIVER        | 11 | 3056531   | + | NM_030207    | Sfi1     | - |
| DMM1  | Cdkn2a <sup>-/-</sup> _C57 | SIN.LV.SF.GFP | LIVER        | 11 | 3058287   | + | NM_030207    | Sfi1     | - |
| DMM1  | Cdkn2a <sup>-/-</sup> _C57 | SIN.LV.SF.GFP | LIVER        | 11 | 3582416   | - | NM_001159288 | More2a   | + |
| DMM4  | Cdkn2a <sup>-/-</sup> _C57 | SIN.LV.SF.GFP | LIVER        | 11 | 6372436   | + | NM_011221    | Purb     | - |
| DMM2  | Cdkn2a <sup>-/-</sup> _C57 | SIN.LV.SF.GFP | LIVER        | 11 | 8531639   | + | NM_001083587 | Tns3     | - |
| DMM1  | Cdkn2a <sup>-/-</sup> _C57 | SIN.LV.SF.GFP | LIVER        | 11 | 8548265   | - | NM_001083587 | Tns3     | - |
| DMM1  | Cdkn2a <sup>-/-</sup> _C57 | SIN.LV.SF.GFP | LIVER        | 11 | 9406339   | + | NM_178259    | Abca13   | + |

|       |                            |               |        |    |          |   |              |          |   |
|-------|----------------------------|---------------|--------|----|----------|---|--------------|----------|---|
| DMM7  | Cdkn2a <sup>-/-</sup> _C57 | SIN.LV.SF.GFP | SPLEEN | 11 | 11469093 | - | NM_015785    | Zbp      | - |
| DMM1  | Cdkn2a <sup>-/-</sup> _C57 | SIN.LV.SF.GFP | LIVER  | 11 | 16558170 | + | NM_007912    | Egfr     | + |
| DMM1  | Cdkn2a <sup>-/-</sup> _C57 | SIN.LV.SF.GFP | LIVER  | 11 | 17166029 | - | NM_020558    | C1d      | + |
| DMM3  | Cdkn2a <sup>-/-</sup> _C57 | SIN.LV.SF.GFP | LIVER  | 11 | 17884764 | - | NM_026576    | Etaa1    | - |
| DMM18 | Cdkn2a <sup>-/-</sup> _C57 | SIN.LV.SF.GFP | SPLEEN | 11 | 18867363 | + | NM_010789    | Meis1    | - |
| DMM9  | Cdkn2a <sup>-/-</sup> _C57 | SIN.LV.SF.GFP | SPLEEN | 11 | 21151832 | + | NM_139061    | Vps54    | + |
| DMM1  | Cdkn2a <sup>-/-</sup> _C57 | SIN.LV.SF.GFP | LIVER  | 11 | 21256178 | + | NM_139297    | Ugp2     | - |
| DMM5  | Cdkn2a <sup>-/-</sup> _C57 | SIN.LV.SF.GFP | LIVER  | 11 | 21267746 | - | NM_139297    | Ugp2     | - |
| DMM3  | Cdkn2a <sup>-/-</sup> _C57 | SIN.LV.SF.GFP | LIVER  | 11 | 21452199 | - | NM_008618    | Mdh1     | - |
| DMM14 | Cdkn2a <sup>-/-</sup> _C57 | SIN.LV.SF.GFP | LIVER  | 11 | 23644545 | + | NM_009044    | Rel      | - |
| DMM9  | Cdkn2a <sup>-/-</sup> _C57 | SIN.LV.SF.GFP | SPLEEN | 11 | 23779433 | + | NM_172555    | Paplg    | - |
| DMM9  | Cdkn2a <sup>-/-</sup> _C57 | SIN.LV.SF.GFP | SPLEEN | 11 | 24056745 | + | NM_001159289 | Bcl11a   | + |
| DMM5  | Cdkn2a <sup>-/-</sup> _C57 | SIN.LV.SF.GFP | LIVER  | 11 | 26375433 | - | NM_027260    | Vrk2     | - |
| DMM5  | Cdkn2a <sup>-/-</sup> _C57 | SIN.LV.SF.GFP | LIVER  | 11 | 29075502 | + | NM_134034    | Smek2    | + |
| DMM1  | Cdkn2a <sup>-/-</sup> _C57 | SIN.LV.SF.GFP | SPLEEN | 11 | 29076491 | + | NM_134034    | Smek2    | + |
| DMM5  | Cdkn2a <sup>-/-</sup> _C57 | SIN.LV.SF.GFP | LIVER  | 11 | 29280933 | + | NM_176841    | Ccdc88a  | + |
| DMM8  | Cdkn2a <sup>-/-</sup> _C57 | SIN.LV.SF.GFP | LIVER  | 11 | 30148395 | - | NM_175836    | Spnb2    | - |
| DMM1  | Cdkn2a <sup>-/-</sup> _C57 | SIN.LV.SF.GFP | LIVER  | 11 | 31777421 | + | NM_026252    | Cpeb4    | + |
| DMM3  | Cdkn2a <sup>-/-</sup> _C57 | SIN.LV.SF.GFP | LIVER  | 11 | 32364071 | - | NM_173784    | Ubt2     | + |
| DMM1  | Cdkn2a <sup>-/-</sup> _C57 | SIN.LV.SF.GFP | LIVER  | 11 | 36892518 | + | NM_011856    | Odz2     | - |
| DMM7  | Cdkn2a <sup>-/-</sup> _C57 | SIN.LV.SF.GFP | LIVER  | 11 | 38439413 | - | NM_011856    | Odz2     | - |
| DMM3  | Cdkn2a <sup>-/-</sup> _C57 | SIN.LV.SF.GFP | LIVER  | 11 | 40215309 | + | NM_134017    | Mat2b    | - |
| DMM1  | Cdkn2a <sup>-/-</sup> _C57 | SIN.LV.SF.GFP | LIVER  | 11 | 40518262 | - | NM_013552    | Hmmr     | - |
| DMM1  | Cdkn2a <sup>-/-</sup> _C57 | SIN.LV.SF.GFP | LIVER  | 11 | 43515141 | + | NM_133795    | Ttc1     | - |
| DMM3  | Cdkn2a <sup>-/-</sup> _C57 | SIN.LV.SF.GFP | LIVER  | 11 | 44277317 | + | NM_024475    | Ublep1   | - |
| DMM7  | Cdkn2a <sup>-/-</sup> _C57 | SIN.LV.SF.GFP | LIVER  | 11 | 45712003 | - | NM_001045520 | Clint1   | + |
| DMM1  | Cdkn2a <sup>-/-</sup> _C57 | SIN.LV.SF.GFP | LIVER  | 11 | 48911820 | + | NM_010999    | Olfr56   | + |
| DMM18 | Cdkn2a <sup>-/-</sup> _C57 | SIN.LV.SF.GFP | SPLEEN | 11 | 51091464 | + | NM_007714    | Clk4     | + |
| DMM5  | Cdkn2a <sup>-/-</sup> _C57 | SIN.LV.SF.GFP | LIVER  | 11 | 51405667 | + | NM_028398    | Agxt2l2  | + |
| DMM8  | Cdkn2a <sup>-/-</sup> _C57 | SIN.LV.SF.GFP | SPLEEN | 11 | 61613915 | + | NM_013881    | Ulk2     | - |
| DMM9  | Cdkn2a <sup>-/-</sup> _C57 | SIN.LV.SF.GFP | SPLEEN | 11 | 63401662 | + | NM_018805    | Hs3st3b1 | - |

|       |                            |               |                  |    |           |   |              |               |   |
|-------|----------------------------|---------------|------------------|----|-----------|---|--------------|---------------|---|
| DMM9  | Cdkn2a <sup>-/-</sup> _C57 | SIN.LV.SF.GFP | SPLEEN           | 11 | 63605823  | + | NM_018805    | Hs3st3b1      | - |
| DMM3  | Cdkn2a <sup>-/-</sup> _C57 | SIN.LV.SF.GFP | LIVER            | 11 | 65545613  | + | NM_009157    | Map2k4        | - |
| DMM12 | Cdkn2a <sup>-/-</sup> _C57 | SIN.LV.SF.GFP | SPLEEN           | 11 | 70729090  | - | NM_019400    | Rabep1        | + |
| DMM3  | Cdkn2a <sup>-/-</sup> _C57 | SIN.LV.SF.GFP | LIVER            | 11 | 74513188  | - | NM_013625    | Pafah1b1      | - |
| DMM5  | Cdkn2a <sup>-/-</sup> _C57 | SIN.LV.SF.GFP | LIVER            | 11 | 75412774  | + | NM_008850    | Pitpna        | + |
| DMM8  | Cdkn2a <sup>-/-</sup> _C57 | SIN.LV.SF.GFP | VER - SPLEEN     | 11 | 77105905  | + | NM_177710    | Ssh2          | + |
| DMM2  | Cdkn2a <sup>-/-</sup> _C57 | SIN.LV.SF.GFP | SPLEEN           | 11 | 81353402  | + | NM_001034013 | Accn1         | - |
| DMM5  | Cdkn2a <sup>-/-</sup> _C57 | SIN.LV.SF.GFP | LIVER            | 11 | 90468599  | + | NM_011505    | Stxbp4        | - |
| DMM12 | Cdkn2a <sup>-/-</sup> _C57 | SIN.LV.SF.GFP | SPLEEN           | 11 | 90508997  | + | NM_028011    | Tom11         | - |
| DMM9  | Cdkn2a <sup>-/-</sup> _C57 | SIN.LV.SF.GFP | LIVER            | 11 | 96924127  | - | NM_001081434 | Osbp17        | + |
| DMM14 | Cdkn2a <sup>-/-</sup> _C57 | SIN.LV.SF.GFP | LIVER            | 11 | 103232830 | + | NM_183034    | Plekhm1       | - |
| DMM5  | Cdkn2a <sup>-/-</sup> _C57 | SIN.LV.SF.GFP | LIVER            | 11 | 104220746 | - | NM_001081045 | 1700081L11Rik | - |
| DMM1  | Cdkn2a <sup>-/-</sup> _C57 | SIN.LV.SF.GFP | LIVER            | 11 | 108379580 | + | NM_029606    | Ccdc46        | + |
| DMM14 | Cdkn2a <sup>-/-</sup> _C57 | SIN.LV.SF.GFP | LIVER            | 11 | 110024509 | - | NM_147220    | Abca9         | - |
| DMM1  | Cdkn2a <sup>-/-</sup> _C57 | SIN.LV.SF.GFP | LIVER            | 11 | 118250896 | - | NM_011150    | Lgals3bp      | - |
| DMM3  | Cdkn2a <sup>-/-</sup> _C57 | SIN.LV.SF.GFP | LIVER            | 12 | 3302508   | + | NM_016676    | Rab10         | - |
| DMM1  | Cdkn2a <sup>-/-</sup> _C57 | SIN.LV.SF.GFP | LIVER            | 12 | 3476443   | + | NM_172421    | Asxl2         | + |
| DMM2  | Cdkn2a <sup>-/-</sup> _C57 | SIN.LV.SF.GFP | LIVER            | 12 | 5274054   | + | NM_001099628 | Atad2b        | + |
| DMM7  | Cdkn2a <sup>-/-</sup> _C57 | SIN.LV.SF.GFP | LIVER            | 12 | 8235648   | - | NM_172401    | 1110057K04Rik | + |
| DMM4  | Cdkn2a <sup>-/-</sup> _C57 | SIN.LV.SF.GFP | SPLEEN           | 12 | 8684759   | - | NM_030723    | Pum2          | + |
| DMM1  | Cdkn2a <sup>-/-</sup> _C57 | SIN.LV.SF.GFP | LIVER            | 12 | 8740770   | - | NM_001160219 | Pum2          | + |
| DMM1  | Cdkn2a <sup>-/-</sup> _C57 | SIN.LV.SF.GFP | LIVER            | 12 | 10400287  | - | NM_023697    | Rdh14         | + |
| DMM9  | Cdkn2a <sup>-/-</sup> _C57 | SIN.LV.SF.GFP | SPLEEN           | 12 | 11737396  | + | NR_003964    | Tubb2a-ps2    | - |
| DMM1  | Cdkn2a <sup>-/-</sup> _C57 | SIN.LV.SF.GFP | SPLEEN           | 12 | 12167895  | + | NM_001146119 | Fam49a        | + |
| DMM18 | Cdkn2a <sup>-/-</sup> _C57 | SIN.LV.SF.GFP | SPLEEN           | 12 | 12222341  | - | NM_001146119 | Fam49a        | + |
| DMM1  | Cdkn2a <sup>-/-</sup> _C57 | SIN.LV.SF.GFP | LIVER            | 12 | 12291226  | + | NM_001146119 | Fam49a        | + |
| DMM11 | Cdkn2a <sup>-/-</sup> _C57 | SIN.LV.SF.GFP | - LIVER - SPLEEN | 12 | 13284027  | + | NM_134040    | Ddx1          | - |
| DMM14 | Cdkn2a <sup>-/-</sup> _C57 | SIN.LV.SF.GFP | LIVER            | 12 | 21419011  | + | NM_011739    | Ywhaq         | - |
| DMM14 | Cdkn2a <sup>-/-</sup> _C57 | SIN.LV.SF.GFP | SPLEEN           | 12 | 25885442  | - | NM_010496    | Id2           | - |
| DMM5  | Cdkn2a <sup>-/-</sup> _C57 | SIN.LV.SF.GFP | LIVER            | 12 | 27040140  | - | NM_001081977 | Rnf144a       | - |
| DMM5  | Cdkn2a <sup>-/-</sup> _C57 | SIN.LV.SF.GFP | LIVER            | 12 | 31582911  | + | NM_001110239 | Acp1          | - |

|       |                            |               |             |    |          |   |              |               |   |
|-------|----------------------------|---------------|-------------|----|----------|---|--------------|---------------|---|
| DMM5  | Cdkn2a <sup>-/-</sup> _C57 | SIN.LV.SF.GFP | SPLEEN      | 12 | 32614393 | - | NM_177993    | Hbp1          | - |
| DMM3  | Cdkn2a <sup>-/-</sup> _C57 | SIN.LV.SF.GFP | LIVER       | 12 | 33026380 | - | NM_001146200 | Pik3cg        | - |
| DMM9  | Cdkn2a <sup>-/-</sup> _C57 | SIN.LV.SF.GFP | LIVER       | 12 | 33143429 | - | NM_001146200 | Pik3cg        | - |
| DMM12 | Cdkn2a <sup>-/-</sup> _C57 | SIN.LV.SF.GFP | VER - SPLEE | 12 | 35243279 | + | NM_024124    | Hdac9         | - |
| DMM14 | Cdkn2a <sup>-/-</sup> _C57 | SIN.LV.SF.GFP | SPLEEN      | 12 | 37113848 | - | NM_178629    | 4930579E17Rik | + |
| DMM4  | Cdkn2a <sup>-/-</sup> _C57 | SIN.LV.SF.GFP | LIVER       | 12 | 38025092 | - | NM_178767    | Tmem195       | + |
| DMM5  | Cdkn2a <sup>-/-</sup> _C57 | SIN.LV.SF.GFP | LIVER       | 12 | 39764514 | + | NM_007960    | Etv1          | + |
| DMM2  | Cdkn2a <sup>-/-</sup> _C57 | SIN.LV.SF.GFP | LIVER       | 12 | 41228927 | - | NM_172803    | Dock4         | + |
| DMM5  | Cdkn2a <sup>-/-</sup> _C57 | SIN.LV.SF.GFP | LIVER       | 12 | 41373979 | + | NM_172803    | Dock4         | + |
| DMM1  | Cdkn2a <sup>-/-</sup> _C57 | SIN.LV.SF.GFP | LIVER       | 12 | 41556301 | + | NM_172803    | Dock4         | + |
| DMM3  | Cdkn2a <sup>-/-</sup> _C57 | SIN.LV.SF.GFP | LIVER       | 12 | 43605593 | + | NM_053122    | Imp2l         | + |
| DMM14 | Cdkn2a <sup>-/-</sup> _C57 | SIN.LV.SF.GFP | LIVER       | 12 | 46021403 | - | NM_144552    | Stxbp6        | - |
| DMM5  | Cdkn2a <sup>-/-</sup> _C57 | SIN.LV.SF.GFP | LIVER       | 12 | 46115393 | + | NM_144552    | Stxbp6        | - |
| DMM1  | Cdkn2a <sup>-/-</sup> _C57 | SIN.LV.SF.GFP | LIVER       | 12 | 47976373 | + | NM_144552    | Stxbp6        | - |
| DMM1  | Cdkn2a <sup>-/-</sup> _C57 | SIN.LV.SF.GFP | LIVER       | 12 | 51714520 | - | NM_008858    | Prkd1         | - |
| DMM14 | Cdkn2a <sup>-/-</sup> _C57 | SIN.LV.SF.GFP | LIVER       | 12 | 52540934 | + | NM_029825    | Scfd1         | + |
| DMM1  | Cdkn2a <sup>-/-</sup> _C57 | SIN.LV.SF.GFP | LIVER       | 12 | 52744516 | + | NM_052973    | Strn3         | - |
| DMM1  | Cdkn2a <sup>-/-</sup> _C57 | SIN.LV.SF.GFP | LIVER       | 12 | 52746399 | + | NM_052973    | Strn3         | - |
| DMM1  | Cdkn2a <sup>-/-</sup> _C57 | SIN.LV.SF.GFP | LIVER       | 12 | 55667658 | - | NM_134054    | 1110002B05Rik | - |
| DMM12 | Cdkn2a <sup>-/-</sup> _C57 | SIN.LV.SF.GFP | VER - SPLEE | 12 | 56162054 | + | NM_028314    | 2700097O09Rik | - |
| DMM12 | Cdkn2a <sup>-/-</sup> _C57 | SIN.LV.SF.GFP | LIVER       | 12 | 56162076 | - | NM_028314    | 2700097O09Rik | - |
| DMM1  | Cdkn2a <sup>-/-</sup> _C57 | SIN.LV.SF.GFP | LIVER       | 12 | 56372678 | + | NM_011899    | Srp54a        | + |
| DMM1  | Cdkn2a <sup>-/-</sup> _C57 | SIN.LV.SF.GFP | LIVER       | 12 | 56473804 | - | NM_025373    | 1110008L16Rik | + |
| DMM9  | Cdkn2a <sup>-/-</sup> _C57 | SIN.LV.SF.GFP | SPLEEN      | 12 | 56895118 | - | NM_001003719 | Garnl1        | - |
| DMM1  | Cdkn2a <sup>-/-</sup> _C57 | SIN.LV.SF.GFP | LIVER       | 12 | 57439741 | + | NM_145442    | Mbip          | - |
| DMM3  | Cdkn2a <sup>-/-</sup> _C57 | SIN.LV.SF.GFP | LIVER       | 12 | 58343537 | + | NM_001037746 | AU021838      | + |
| DMM14 | Cdkn2a <sup>-/-</sup> _C57 | SIN.LV.SF.GFP | LIVER       | 12 | 59632158 | - | NM_025809    | Clec14a       | - |
| DMM5  | Cdkn2a <sup>-/-</sup> _C57 | SIN.LV.SF.GFP | LIVER       | 12 | 60060702 | + | NM_009147    | Sec23a        | - |
| DMM5  | Cdkn2a <sup>-/-</sup> _C57 | SIN.LV.SF.GFP | LIVER       | 12 | 60101740 | - | NM_009147    | Sec23a        | - |
| DMM1  | Cdkn2a <sup>-/-</sup> _C57 | SIN.LV.SF.GFP | LIVER       | 12 | 60156520 | - | NM_030057    | Trappc6b      | - |
| DMM9  | Cdkn2a <sup>-/-</sup> _C57 | SIN.LV.SF.GFP | LIVER       | 12 | 66023214 | - | NM_001025605 | Gm527         | + |

|       |                            |               |                |    |           |   |              |               |   |
|-------|----------------------------|---------------|----------------|----|-----------|---|--------------|---------------|---|
| DMM18 | Cdkn2a <sup>-/-</sup> _C57 | SIN.LV.SF.GFP | LIVER          | 12 | 66045342  | + | NM_025707    | Klh128        | - |
| DMM3  | Cdkn2a <sup>-/-</sup> _C57 | SIN.LV.SF.GFP | LIVER          | 12 | 66059684  | + | NM_025707    | Klh128        | - |
| DMM3  | Cdkn2a <sup>-/-</sup> _C57 | SIN.LV.SF.GFP | LIVER          | 12 | 66081169  | + | NM_025707    | Klh128        | - |
| DMM7  | Cdkn2a <sup>-/-</sup> _C57 | SIN.LV.SF.GFP | SPLEEN         | 12 | 66147568  | - | NM_177806    | Prpf39        | + |
| DMM2  | Cdkn2a <sup>-/-</sup> _C57 | SIN.LV.SF.GFP | SPLEEN         | 12 | 67922425  | + | NM_207010    | Mdga2         | - |
| DMM8  | Cdkn2a <sup>-/-</sup> _C57 | SIN.LV.SF.GFP | LIVER          | 12 | 69942335  | - | NM_009093    | Rps29         | - |
| DMM5  | Cdkn2a <sup>-/-</sup> _C57 | SIN.LV.SF.GFP | LIVER          | 12 | 70948461  | - | NM_201519    | Map4k5        | - |
| DMM1  | Cdkn2a <sup>-/-</sup> _C57 | SIN.LV.SF.GFP | SPLEEN         | 12 | 73639370  | + | NM_026327    | 1810048J11Rik | + |
| DMM1  | Cdkn2a <sup>-/-</sup> _C57 | SIN.LV.SF.GFP | LIVER          | 12 | 75029575  | + | NM_010431    | Hif1a         | + |
| DMM1  | Cdkn2a <sup>-/-</sup> _C57 | SIN.LV.SF.GFP | LIVER          | 12 | 75048022  | - | NM_010431    | Hif1a         | + |
| DMM1  | Cdkn2a <sup>-/-</sup> _C57 | SIN.LV.SF.GFP | LIVER          | 12 | 76831796  | + | NM_030750    | Sgpp1         | - |
| DMM2  | Cdkn2a <sup>-/-</sup> _C57 | SIN.LV.SF.GFP | LIVER          | 12 | 77042928  | + | NM_001005510 | Syne2         | + |
| DMM1  | Cdkn2a <sup>-/-</sup> _C57 | SIN.LV.SF.GFP | LIVER          | 12 | 78248817  | + | NM_016893    | Fut8          | + |
| DMM8  | Cdkn2a <sup>-/-</sup> _C57 | SIN.LV.SF.GFP | LIVER          | 12 | 78354328  | + | NM_016893    | Fut8          | + |
| DMM8  | Cdkn2a <sup>-/-</sup> _C57 | SIN.LV.SF.GFP | LIVER          | 12 | 79611171  | - | NM_172952    | Gphn          | + |
| DMM14 | Cdkn2a <sup>-/-</sup> _C57 | SIN.LV.SF.GFP | LIVER          | 12 | 80416099  | + | NM_009014    | Rad5111       | + |
| DMM14 | Cdkn2a <sup>-/-</sup> _C57 | SIN.LV.SF.GFP | SPLEEN         | 12 | 82572864  | + | NM_025461    | 1810020G14Rik | - |
| DMM5  | Cdkn2a <sup>-/-</sup> _C57 | SIN.LV.SF.GFP | LIVER          | 12 | 83336157  | + | NM_172579    | Sipa111       | + |
| DMM1  | Cdkn2a <sup>-/-</sup> _C57 | SIN.LV.SF.GFP | LIVER          | 12 | 85000821  | - | NM_027349    | Rbm25         | + |
| DMM2  | Cdkn2a <sup>-/-</sup> _C57 | SIN.LV.SF.GFP | LIVER          | 12 | 85638592  | - | NM_029880    | Ptgr2         | + |
| DMM1  | Cdkn2a <sup>-/-</sup> _C57 | SIN.LV.SF.GFP | LIVER          | 12 | 88764686  | - | NM_001102565 | Alkbh1        | - |
| DMM3  | Cdkn2a <sup>-/-</sup> _C57 | SIN.LV.SF.GFP | LIVER          | 12 | 89664347  | - | NM_028105    | Adck1         | + |
| DMM7  | Cdkn2a <sup>-/-</sup> _C57 | SIN.LV.SF.GFP | LIVER          | 12 | 92606851  | - | NM_181815    | 4930534B04Rik | - |
| DMM2  | Cdkn2a <sup>-/-</sup> _C57 | SIN.LV.SF.GFP | LIVER          | 12 | 96016885  | + | NM_201518    | Flrt2         | + |
| DMM5  | Cdkn2a <sup>-/-</sup> _C57 | SIN.LV.SF.GFP | LIVER          | 12 | 99480543  | - | NM_008079    | Galc          | - |
| DMM14 | Cdkn2a <sup>-/-</sup> _C57 | SIN.LV.SF.GFP | LIVER          | 12 | 100039228 | + | NM_001081191 | Eml5          | - |
| DMM1  | Cdkn2a <sup>-/-</sup> _C57 | SIN.LV.SF.GFP | LIVER          | 12 | 101221955 | + | NM_146037    | Kcnk13        | + |
| DMM5  | Cdkn2a <sup>-/-</sup> _C57 | SIN.LV.SF.GFP | LIVER          | 12 | 103160603 | - | NM_029705    | Atxn3         | - |
| DMM8  | Cdkn2a <sup>-/-</sup> _C57 | SIN.LV.SF.GFP | LIVER - SPLEEN | 12 | 104012350 | - | NM_025666    | Ubr7          | + |
| DMM1  | Cdkn2a <sup>-/-</sup> _C57 | SIN.LV.SF.GFP | LIVER          | 12 | 104272026 | - | NM_001081017 | Unc79         | + |
| DMM3  | Cdkn2a <sup>-/-</sup> _C57 | SIN.LV.SF.GFP | LIVER          | 12 | 104634635 | + | NM_026580    | Otub2         | + |

|       |                            |               |             |    |           |   |              |           |   |
|-------|----------------------------|---------------|-------------|----|-----------|---|--------------|-----------|---|
| DMM14 | Cdkn2a <sup>-/-</sup> _C57 | SIN.LV.SF.GFP | LIVER       | 12 | 117547158 | - | NM_028731    | Fam62b    | + |
| DMM5  | Cdkn2a <sup>-/-</sup> _C57 | SIN.LV.SF.GFP | LIVER       | 12 | 117569020 | + | NM_028731    | Fam62b    | + |
| DMM1  | Cdkn2a <sup>-/-</sup> _C57 | SIN.LV.SF.GFP | LIVER       | 12 | 117586519 | + | NM_028731    | Fam62b    | + |
| DMM12 | Cdkn2a <sup>-/-</sup> _C57 | SIN.LV.SF.GFP | VER - SPLEE | 12 | 117658330 | - | NM_133762    | Ncapg2    | + |
| DMM5  | Cdkn2a <sup>-/-</sup> _C57 | SIN.LV.SF.GFP | LIVER       | 12 | 117683989 | - | NM_133762    | Ncapg2    | + |
| DMM1  | Cdkn2a <sup>-/-</sup> _C57 | SIN.LV.SF.GFP | LIVER       | 12 | 119244383 | - | NM_010060    | Dnahc11   | - |
| DMM14 | Cdkn2a <sup>-/-</sup> _C57 | SIN.LV.SF.GFP | LIVER       | 12 | 120341806 | + | NM_177290    | Itgb8     | - |
| DMM14 | Cdkn2a <sup>-/-</sup> _C57 | SIN.LV.SF.GFP | LIVER       | 12 | 120602679 | - | NM_177290    | Itgb8     | - |
| DMM14 | Cdkn2a <sup>-/-</sup> _C57 | SIN.LV.SF.GFP | LIVER       | 13 | 3599542   | + | NM_134063    | BC016423  | - |
| DMM14 | Cdkn2a <sup>-/-</sup> _C57 | SIN.LV.SF.GFP | LIVER       | 13 | 3600480   | - | NM_134063    | BC016423  | - |
| DMM5  | Cdkn2a <sup>-/-</sup> _C57 | SIN.LV.SF.GFP | LIVER       | 13 | 4651558   | + | NM_018859    | Akr1e1    | - |
| DMM5  | Cdkn2a <sup>-/-</sup> _C57 | SIN.LV.SF.GFP | LIVER       | 13 | 5405720   | + | NM_011803    | Klf6      | + |
| DMM2  | Cdkn2a <sup>-/-</sup> _C57 | SIN.LV.SF.GFP | LIVER       | 13 | 5417261   | + | NM_011803    | Klf6      | + |
| DMM3  | Cdkn2a <sup>-/-</sup> _C57 | SIN.LV.SF.GFP | LIVER       | 13 | 5824911   | + | NM_011803    | Klf6      | + |
| DMM1  | Cdkn2a <sup>-/-</sup> _C57 | SIN.LV.SF.GFP | LIVER       | 13 | 6894019   | + | NM_019703    | Pfcp      | - |
| DMM18 | Cdkn2a <sup>-/-</sup> _C57 | SIN.LV.SF.GFP | SPLEEN      | 13 | 9298802   | - | NM_001081426 | Dip2c     | + |
| DMM1  | Cdkn2a <sup>-/-</sup> _C57 | SIN.LV.SF.GFP | LIVER       | 13 | 10223327  | - | NM_033269    | Chrm3     | - |
| DMM14 | Cdkn2a <sup>-/-</sup> _C57 | SIN.LV.SF.GFP | LIVER       | 13 | 12546079  | - | NM_018886    | Lgals8    | - |
| DMM3  | Cdkn2a <sup>-/-</sup> _C57 | SIN.LV.SF.GFP | LIVER       | 13 | 13744051  | - | NM_010748    | Lyst      | + |
| DMM3  | Cdkn2a <sup>-/-</sup> _C57 | SIN.LV.SF.GFP | LIVER       | 13 | 14243474  | - | NM_194262    | Arid4b    | + |
| DMM1  | Cdkn2a <sup>-/-</sup> _C57 | SIN.LV.SF.GFP | LIVER       | 13 | 14735287  | + | NM_001104646 | AW209491  | + |
| DMM5  | Cdkn2a <sup>-/-</sup> _C57 | SIN.LV.SF.GFP | LIVER       | 13 | 18814203  | - | NM_172120    | Vps41     | + |
| DMM14 | Cdkn2a <sup>-/-</sup> _C57 | SIN.LV.SF.GFP | SPLEEN      | 13 | 18850907  | - | NM_172120    | Vps41     | + |
| DMM1  | Cdkn2a <sup>-/-</sup> _C57 | SIN.LV.SF.GFP | LIVER       | 13 | 20061416  | + | NM_181754    | Gpr141    | - |
| DMM14 | Cdkn2a <sup>-/-</sup> _C57 | SIN.LV.SF.GFP | LIVER       | 13 | 23785490  | + | NM_023422    | Hist1h2bc | + |
| DMM2  | Cdkn2a <sup>-/-</sup> _C57 | SIN.LV.SF.GFP | LIVER       | 13 | 28370386  | - | NM_023746    | Pr15a1    | + |
| DMM1  | Cdkn2a <sup>-/-</sup> _C57 | SIN.LV.SF.GFP | LIVER       | 13 | 29443593  | + | NM_144536    | Cdkal1    | - |
| DMM7  | Cdkn2a <sup>-/-</sup> _C57 | SIN.LV.SF.GFP | SPLEEN      | 13 | 30943251  | + | NM_025588    | Exoc2     | - |
| DMM8  | Cdkn2a <sup>-/-</sup> _C57 | SIN.LV.SF.GFP | LIVER       | 13 | 41410437  | - | NM_001111324 | Nedd9     | - |
| DMM14 | Cdkn2a <sup>-/-</sup> _C57 | SIN.LV.SF.GFP | LIVER       | 13 | 41515805  | + | NM_001111324 | Nedd9     | - |
| DMM5  | Cdkn2a <sup>-/-</sup> _C57 | SIN.LV.SF.GFP | LIVER       | 13 | 49373198  | - | NM_015759    | Fgd3      | - |

|       |                            |               |                  |    |          |   |              |               |   |
|-------|----------------------------|---------------|------------------|----|----------|---|--------------|---------------|---|
| DMM14 | Cdkn2a <sup>-/-</sup> _C57 | SIN.LV.SF.GFP | LIVER            | 13 | 52654725 | + | NM_001024474 | Diras2        | - |
| DMM11 | Cdkn2a <sup>-/-</sup> _C57 | SIN.LV.SF.GFP | - LIVER - SPLEEN | 13 | 53698759 | - | NM_013601    | Msx2          | - |
| DMM1  | Cdkn2a <sup>-/-</sup> _C57 | SIN.LV.SF.GFP | SPLEEN           | 13 | 54567739 | - | NM_028597    | Thoc3         | - |
| DMM3  | Cdkn2a <sup>-/-</sup> _C57 | SIN.LV.SF.GFP | LIVER            | 13 | 56821427 | - | NM_008541    | Smad5         | + |
| DMM5  | Cdkn2a <sup>-/-</sup> _C57 | SIN.LV.SF.GFP | LIVER            | 13 | 59966351 | + | NM_153538    | Zcchc6        | - |
| DMM5  | Cdkn2a <sup>-/-</sup> _C57 | SIN.LV.SF.GFP | LIVER            | 13 | 60978258 | + | NM_178098    | 4930486L24Rik | - |
| DMM3  | Cdkn2a <sup>-/-</sup> _C57 | SIN.LV.SF.GFP | LIVER            | 13 | 63946216 | + | NM_023507    | 0610007P08Rik | + |
| DMM5  | Cdkn2a <sup>-/-</sup> _C57 | SIN.LV.SF.GFP | LIVER            | 13 | 63949811 | + | NM_023507    | 0610007P08Rik | + |
| DMM14 | Cdkn2a <sup>-/-</sup> _C57 | SIN.LV.SF.GFP | LIVER            | 13 | 64315652 | - | NM_001122989 | Cdc14b        | - |
| DMM3  | Cdkn2a <sup>-/-</sup> _C57 | SIN.LV.SF.GFP | LIVER            | 13 | 65172820 | - | NM_001083901 | Hiat1         | - |
| DMM1  | Cdkn2a <sup>-/-</sup> _C57 | SIN.LV.SF.GFP | LIVER            | 13 | 67611812 | + | NM_133228    | Zfp87         | - |
| DMM5  | Cdkn2a <sup>-/-</sup> _C57 | SIN.LV.SF.GFP | LIVER            | 13 | 67926791 | + | NM_198322    | Zfp273        | + |
| DMM8  | Cdkn2a <sup>-/-</sup> _C57 | SIN.LV.SF.GFP | LIVER - SPLEEN   | 13 | 68730855 | - | NM_027123    | Fastkd3       | + |
| DMM5  | Cdkn2a <sup>-/-</sup> _C57 | SIN.LV.SF.GFP | LIVER            | 13 | 73917819 | - | NM_011390    | Slc12a7       | + |
| DMM14 | Cdkn2a <sup>-/-</sup> _C57 | SIN.LV.SF.GFP | LIVER            | 13 | 74320412 | + | NM_177333    | Exoc3         | - |
| DMM1  | Cdkn2a <sup>-/-</sup> _C57 | SIN.LV.SF.GFP | LIVER            | 13 | 74388063 | - | NM_009644    | Ahrr          | - |
| DMM14 | Cdkn2a <sup>-/-</sup> _C57 | SIN.LV.SF.GFP | LIVER            | 13 | 75931137 | - | NM_138953    | Ell2          | + |
| DMM5  | Cdkn2a <sup>-/-</sup> _C57 | SIN.LV.SF.GFP | LIVER            | 13 | 76301223 | - | NM_001081352 | Ttc37         | + |
| DMM14 | Cdkn2a <sup>-/-</sup> _C57 | SIN.LV.SF.GFP | SPLEEN           | 13 | 76389172 | + | NM_001081352 | Ttc37         | + |
| DMM1  | Cdkn2a <sup>-/-</sup> _C57 | SIN.LV.SF.GFP | LIVER            | 13 | 76867806 | + | NM_030174    | Mctp1         | + |
| DMM13 | Cdkn2a <sup>-/-</sup> _C57 | SIN.LV.SF.GFP | SPLEEN           | 13 | 76881752 | - | NM_030174    | Mctp1         | + |
| DMM14 | Cdkn2a <sup>-/-</sup> _C57 | SIN.LV.SF.GFP | SPLEEN           | 13 | 77578170 | + | NM_001145676 | 2210408I21Rik | + |
| DMM3  | Cdkn2a <sup>-/-</sup> _C57 | SIN.LV.SF.GFP | LIVER            | 13 | 78063285 | + | NM_010151    | Nr2f1         | - |
| DMM5  | Cdkn2a <sup>-/-</sup> _C57 | SIN.LV.SF.GFP | LIVER            | 13 | 78107487 | + | NM_010151    | Nr2f1         | - |
| DMM14 | Cdkn2a <sup>-/-</sup> _C57 | SIN.LV.SF.GFP | LIVER            | 13 | 78175399 | + | NM_010151    | Nr2f1         | - |
| DMM9  | Cdkn2a <sup>-/-</sup> _C57 | SIN.LV.SF.GFP | LIVER            | 13 | 79283492 | - | NM_010151    | Nr2f1         | - |
| DMM7  | Cdkn2a <sup>-/-</sup> _C57 | SIN.LV.SF.GFP | LIVER            | 13 | 80863784 | - | NM_001042591 | Arrdc3        | + |
| DMM5  | Cdkn2a <sup>-/-</sup> _C57 | SIN.LV.SF.GFP | LIVER            | 13 | 81331670 | + | NM_054053    | Gpr98         | - |
| DMM5  | Cdkn2a <sup>-/-</sup> _C57 | SIN.LV.SF.GFP | LIVER            | 13 | 82215940 | + | NM_007684    | Cetn3         | + |
| DMM14 | Cdkn2a <sup>-/-</sup> _C57 | SIN.LV.SF.GFP | LIVER            | 13 | 82771919 | + | NM_007684    | Cetn3         | + |
| DMM14 | Cdkn2a <sup>-/-</sup> _C57 | SIN.LV.SF.GFP | LIVER            | 13 | 84412331 | - | NM_175187    | Tmem161b      | + |

|       |                            |               |               |    |           |   |              |          |   |
|-------|----------------------------|---------------|---------------|----|-----------|---|--------------|----------|---|
| DMM2  | Cdkn2a <sup>-/-</sup> _C57 | SIN.LV.SF.GFP | LIVER         | 13 | 84430846  | - | NM_175187    | Tmem161b | + |
| DMM6  | Cdkn2a <sup>-/-</sup> _C57 | SIN.LV.SF.GFP | SPLEEN        | 13 | 85357793  | + | NM_145452    | Rasa1    | - |
| DMM6  | Cdkn2a <sup>-/-</sup> _C57 | SIN.LV.SF.GFP | VER - SPLEEN  | 13 | 85357944  | - | NM_145452    | Rasa1    | - |
| DMM5  | Cdkn2a <sup>-/-</sup> _C57 | SIN.LV.SF.GFP | LIVER         | 13 | 85369449  | + | NM_145452    | Rasa1    | - |
| DMM14 | Cdkn2a <sup>-/-</sup> _C57 | SIN.LV.SF.GFP | LIVER         | 13 | 85388870  | + | NM_145452    | Rasa1    | - |
| DMM3  | Cdkn2a <sup>-/-</sup> _C57 | SIN.LV.SF.GFP | LIVER         | 13 | 85393367  | - | NM_145452    | Rasa1    | - |
| DMM5  | Cdkn2a <sup>-/-</sup> _C57 | SIN.LV.SF.GFP | LIVER         | 13 | 85425696  | - | NM_145452    | Rasa1    | - |
| DMM5  | Cdkn2a <sup>-/-</sup> _C57 | SIN.LV.SF.GFP | coma - SPLEEN | 13 | 85448303  | + | NM_145452    | Rasa1    | - |
| DMM1  | Cdkn2a <sup>-/-</sup> _C57 | SIN.LV.SF.GFP | LIVER         | 13 | 85655361  | - | NM_145452    | Rasa1    | - |
| DMM1  | Cdkn2a <sup>-/-</sup> _C57 | SIN.LV.SF.GFP | LIVER         | 13 | 85681892  | - | NM_145452    | Rasa1    | - |
| DMM8  | Cdkn2a <sup>-/-</sup> _C57 | SIN.LV.SF.GFP | VER - SPLEEN  | 13 | 87119205  | + | NM_007749    | Cox7c    | - |
| DMM1  | Cdkn2a <sup>-/-</sup> _C57 | SIN.LV.SF.GFP | LIVER         | 13 | 88852480  | + | NM_001037987 | Edil3    | + |
| DMM14 | Cdkn2a <sup>-/-</sup> _C57 | SIN.LV.SF.GFP | LIVER         | 13 | 89502345  | + | NM_001037987 | Edil3    | + |
| DMM2  | Cdkn2a <sup>-/-</sup> _C57 | SIN.LV.SF.GFP | LIVER         | 13 | 89561888  | - | NM_001037987 | Edil3    | + |
| DMM1  | Cdkn2a <sup>-/-</sup> _C57 | SIN.LV.SF.GFP | LIVER         | 13 | 89642176  | - | NM_013500    | Hapln1   | + |
| DMM1  | Cdkn2a <sup>-/-</sup> _C57 | SIN.LV.SF.GFP | LIVER         | 13 | 91747840  | + | NM_024186    | Ssbp2    | + |
| DMM1  | Cdkn2a <sup>-/-</sup> _C57 | SIN.LV.SF.GFP | LIVER         | 13 | 91845321  | - | NM_024272    | Ssbp2    | + |
| DMM1  | Cdkn2a <sup>-/-</sup> _C57 | SIN.LV.SF.GFP | LIVER         | 13 | 94634494  | + | NM_009712    | Arsb     | + |
| DMM3  | Cdkn2a <sup>-/-</sup> _C57 | SIN.LV.SF.GFP | LIVER         | 13 | 99538216  | - | NM_172591    | Fcho2    | - |
| DMM1  | Cdkn2a <sup>-/-</sup> _C57 | SIN.LV.SF.GFP | LIVER         | 13 | 101219739 | + | NM_008670    | Naip1    | - |
| DMM3  | Cdkn2a <sup>-/-</sup> _C57 | SIN.LV.SF.GFP | LIVER         | 13 | 104887213 | + | NM_029447    | Nln      | - |
| DMM5  | Cdkn2a <sup>-/-</sup> _C57 | SIN.LV.SF.GFP | SPLEEN        | 13 | 105085757 | - | NM_001081020 | Adamts6  | + |
| DMM1  | Cdkn2a <sup>-/-</sup> _C57 | SIN.LV.SF.GFP | LIVER         | 13 | 107617499 | + | NM_029665    | Ipo11    | - |
| DMM7  | Cdkn2a <sup>-/-</sup> _C57 | SIN.LV.SF.GFP | SPLEEN        | 13 | 110242575 | - | NM_011056    | Pde4d    | + |
| DMM3  | Cdkn2a <sup>-/-</sup> _C57 | SIN.LV.SF.GFP | SPLEEN        | 13 | 111324796 | - | NM_152804    | Plk2     | + |
| DMM1  | Cdkn2a <sup>-/-</sup> _C57 | SIN.LV.SF.GFP | LIVER         | 13 | 111682379 | - | NM_175497    | Actb12   | + |
| DMM14 | Cdkn2a <sup>-/-</sup> _C57 | SIN.LV.SF.GFP | LIVER         | 13 | 113495299 | + | NM_178746    | Slc38a9  | + |
| DMM5  | Cdkn2a <sup>-/-</sup> _C57 | SIN.LV.SF.GFP | LIVER         | 13 | 114143256 | + | NM_023612    | Esm1     | + |
| DMM5  | Cdkn2a <sup>-/-</sup> _C57 | SIN.LV.SF.GFP | LIVER         | 13 | 114700461 | - | NM_172595    | Arl15    | + |
| DMM9  | Cdkn2a <sup>-/-</sup> _C57 | SIN.LV.SF.GFP | VER - SPLEEN  | 13 | 114789113 | - | NM_172595    | Arl15    | + |
| DMM1  | Cdkn2a <sup>-/-</sup> _C57 | SIN.LV.SF.GFP | LIVER         | 13 | 117799491 | - | NM_001081009 | Parp8    | - |



|       |                            |               |        |    |           |   |              |               |   |
|-------|----------------------------|---------------|--------|----|-----------|---|--------------|---------------|---|
| DMM3  | Cdkn2a <sup>-/-</sup> _C57 | SIN.LV.SF.GFP | LIVER  | 13 | 120114387 | - | NM_008710    | Nnt           | - |
| DMM5  | Cdkn2a <sup>-/-</sup> _C57 | SIN.LV.SF.GFP | LIVER  | 14 | 9814953   | - | NM_028934    | 4930452B06Rik | - |
| DMM3  | Cdkn2a <sup>-/-</sup> _C57 | SIN.LV.SF.GFP | LIVER  | 14 | 10309461  | + | NM_010210    | Fhit          | - |
| DMM5  | Cdkn2a <sup>-/-</sup> _C57 | SIN.LV.SF.GFP | LIVER  | 14 | 11140271  | + | NM_010210    | Fhit          | - |
| DMM1  | Cdkn2a <sup>-/-</sup> _C57 | SIN.LV.SF.GFP | LIVER  | 14 | 13133232  | - | NM_146051    | 3830406C13Rik | + |
| DMM14 | Cdkn2a <sup>-/-</sup> _C57 | SIN.LV.SF.GFP | LIVER  | 14 | 14198987  | - | NM_028052    | Synpr         | + |
| DMM5  | Cdkn2a <sup>-/-</sup> _C57 | SIN.LV.SF.GFP | SPLEEN | 14 | 15538358  | + | NM_001033270 | Slc4a7        | + |
| DMM3  | Cdkn2a <sup>-/-</sup> _C57 | SIN.LV.SF.GFP | LIVER  | 14 | 15551736  | - | NM_001033270 | Slc4a7        | + |
| DMM1  | Cdkn2a <sup>-/-</sup> _C57 | SIN.LV.SF.GFP | LIVER  | 14 | 17882937  | - | NM_011243    | Rarb          | - |
| DMM1  | Cdkn2a <sup>-/-</sup> _C57 | SIN.LV.SF.GFP | LIVER  | 14 | 18241726  | - | NM_001113417 | Thrb          | + |
| DMM9  | Cdkn2a <sup>-/-</sup> _C57 | SIN.LV.SF.GFP | LIVER  | 14 | 18502711  | - | NM_001113417 | Thrb          | + |
| DMM1  | Cdkn2a <sup>-/-</sup> _C57 | SIN.LV.SF.GFP | LIVER  | 14 | 21173455  | + | NM_001024512 | Fam149b       | + |
| DMM5  | Cdkn2a <sup>-/-</sup> _C57 | SIN.LV.SF.GFP | LIVER  | 14 | 21430869  | - | NM_030180    | Usp54         | - |
| DMM18 | Cdkn2a <sup>-/-</sup> _C57 | SIN.LV.SF.GFP | SPLEEN | 14 | 22155133  | - | NM_134079    | Adk           | + |
| DMM5  | Cdkn2a <sup>-/-</sup> _C57 | SIN.LV.SF.GFP | LIVER  | 14 | 22189383  | + | NM_134079    | Adk           | + |
| DMM2  | Cdkn2a <sup>-/-</sup> _C57 | SIN.LV.SF.GFP | LIVER  | 14 | 22654861  | + | NM_011695    | Vdac2         | + |
| DMM5  | Cdkn2a <sup>-/-</sup> _C57 | SIN.LV.SF.GFP | LIVER  | 14 | 22843625  | + | NM_028275    | 1700112E06Rik | + |
| DMM3  | Cdkn2a <sup>-/-</sup> _C57 | SIN.LV.SF.GFP | LIVER  | 14 | 26446648  | - | NM_183208    | Zmiz1         | + |
| DMM5  | Cdkn2a <sup>-/-</sup> _C57 | SIN.LV.SF.GFP | LIVER  | 14 | 27247835  | + | NM_032008    | Slmap         | - |
| DMM5  | Cdkn2a <sup>-/-</sup> _C57 | SIN.LV.SF.GFP | LIVER  | 14 | 27347905  | - | NM_032008    | Slmap         | - |
| DMM5  | Cdkn2a <sup>-/-</sup> _C57 | SIN.LV.SF.GFP | LIVER  | 14 | 28240572  | + | NM_001114879 | D14Abble      | + |
| DMM1  | Cdkn2a <sup>-/-</sup> _C57 | SIN.LV.SF.GFP | LIVER  | 14 | 29580632  | + | NM_009785    | Cacna2d3      | - |
| DMM11 | Cdkn2a <sup>-/-</sup> _C57 | SIN.LV.SF.GFP | SPLEEN | 14 | 31487869  | - | NM_177815    | Rft1          | + |
| DMM7  | Cdkn2a <sup>-/-</sup> _C57 | SIN.LV.SF.GFP | SPLEEN | 14 | 32577239  | - | NM_001024604 | Ankrd28       | - |
| DMM1  | Cdkn2a <sup>-/-</sup> _C57 | SIN.LV.SF.GFP | LIVER  | 14 | 35089513  | - | NM_029389    | 3110001K24Rik | - |
| DMM5  | Cdkn2a <sup>-/-</sup> _C57 | SIN.LV.SF.GFP | LIVER  | 14 | 35136280  | - | NM_008133    | Glud1         | + |
| DMM1  | Cdkn2a <sup>-/-</sup> _C57 | SIN.LV.SF.GFP | SPLEEN | 14 | 35525754  | - | NM_001004436 | Wapal         | + |
| DMM5  | Cdkn2a <sup>-/-</sup> _C57 | SIN.LV.SF.GFP | LIVER  | 14 | 37758468  | + | NM_027045    | Gcap14        | - |
| DMM14 | Cdkn2a <sup>-/-</sup> _C57 | SIN.LV.SF.GFP | SPLEEN | 14 | 39647278  | + | NM_008734    | Nrg3          | - |
| DMM14 | Cdkn2a <sup>-/-</sup> _C57 | SIN.LV.SF.GFP | LIVER  | 14 | 45660620  | + | NM_008964    | Ptger2        | + |
| DMM14 | Cdkn2a <sup>-/-</sup> _C57 | SIN.LV.SF.GFP | LIVER  | 14 | 45845034  | - | NM_027518    | Gpr137c       | + |

|       |                            |               |                |    |           |   |              |               |   |
|-------|----------------------------|---------------|----------------|----|-----------|---|--------------|---------------|---|
| DMM14 | Cdkn2a <sup>-/-</sup> _C57 | SIN.LV.SF.GFP | LIVER          | 14 | 49070755  | + | NM_172600    | 6720456H20Rik | + |
| DMM1  | Cdkn2a <sup>-/-</sup> _C57 | SIN.LV.SF.GFP | LIVER          | 14 | 49800162  | - | NM_001081430 | Nat12         | + |
| DMM5  | Cdkn2a <sup>-/-</sup> _C57 | SIN.LV.SF.GFP | LIVER          | 14 | 50686649  | + | NM_146316    | Olf1726       | - |
| DMM3  | Cdkn2a <sup>-/-</sup> _C57 | SIN.LV.SF.GFP | LIVER          | 14 | 52854297  | + | NM_201637    | Chd8          | - |
| DMM9  | Cdkn2a <sup>-/-</sup> _C57 | SIN.LV.SF.GFP | LIVER          | 14 | 54734973  | + | NM_001113358 | Dad1          | - |
| DMM3  | Cdkn2a <sup>-/-</sup> _C57 | SIN.LV.SF.GFP | LIVER          | 14 | 62157955  | + | NM_025697    | 6330409N04Rik | - |
| DMM18 | Cdkn2a <sup>-/-</sup> _C57 | SIN.LV.SF.GFP | SPLEEN         | 14 | 63368431  | - | NM_008715    | Ints6         | - |
| DMM7  | Cdkn2a <sup>-/-</sup> _C57 | SIN.LV.SF.GFP | LIVER          | 14 | 63471507  | + | NM_175546    | Wdfy2         | + |
| DMM14 | Cdkn2a <sup>-/-</sup> _C57 | SIN.LV.SF.GFP | LIVER          | 14 | 64512884  | + | NM_028228    | 2610028A01Rik | + |
| DMM8  | Cdkn2a <sup>-/-</sup> _C57 | SIN.LV.SF.GFP | LIVER - SPLEEN | 14 | 65272867  | + | NM_001081177 | Kif13b        | + |
| DMM13 | Cdkn2a <sup>-/-</sup> _C57 | SIN.LV.SF.GFP | SPLEEN         | 14 | 67001047  | - | NM_019675    | Stmn4         | + |
| DMM3  | Cdkn2a <sup>-/-</sup> _C57 | SIN.LV.SF.GFP | LIVER          | 14 | 67619476  | - | NM_009761    | Bnip3l        | - |
| DMM3  | Cdkn2a <sup>-/-</sup> _C57 | SIN.LV.SF.GFP | LIVER          | 14 | 68301442  | + | NM_001110162 | Cdca2         | - |
| DMM3  | Cdkn2a <sup>-/-</sup> _C57 | SIN.LV.SF.GFP | LIVER          | 14 | 73717302  | - | NM_009029    | Rb1           | - |
| DMM5  | Cdkn2a <sup>-/-</sup> _C57 | SIN.LV.SF.GFP | LIVER          | 14 | 76142053  | + | NM_177381    | Cog3          | - |
| DMM9  | Cdkn2a <sup>-/-</sup> _C57 | SIN.LV.SF.GFP | LIVER          | 14 | 76161958  | + | NM_026232    | Slc25a30      | - |
| DMM9  | Cdkn2a <sup>-/-</sup> _C57 | SIN.LV.SF.GFP | LIVER          | 14 | 76162167  | - | NM_026232    | Slc25a30      | - |
| DMM3  | Cdkn2a <sup>-/-</sup> _C57 | SIN.LV.SF.GFP | LIVER          | 14 | 76332318  | + | NM_026816    | Gtf2f2        | - |
| DMM5  | Cdkn2a <sup>-/-</sup> _C57 | SIN.LV.SF.GFP | LIVER          | 14 | 77736207  | + | NM_172813    | Enox1         | + |
| DMM7  | Cdkn2a <sup>-/-</sup> _C57 | SIN.LV.SF.GFP | LIVER          | 14 | 78074775  | + | NM_172813    | Enox1         | + |
| DMM14 | Cdkn2a <sup>-/-</sup> _C57 | SIN.LV.SF.GFP | LIVER          | 14 | 79773435  | + | NM_025832    | Narg1l        | - |
| DMM5  | Cdkn2a <sup>-/-</sup> _C57 | SIN.LV.SF.GFP | LIVER          | 14 | 82816605  | - | NM_001013753 | Pcdh17        | + |
| DMM1  | Cdkn2a <sup>-/-</sup> _C57 | SIN.LV.SF.GFP | LIVER          | 14 | 87056720  | + | NM_019670    | Diap3         | - |
| DMM3  | Cdkn2a <sup>-/-</sup> _C57 | SIN.LV.SF.GFP | LIVER          | 14 | 87251651  | + | NM_019670    | Diap3         | - |
| DMM3  | Cdkn2a <sup>-/-</sup> _C57 | SIN.LV.SF.GFP | LIVER          | 14 | 87864156  | - | NM_172605    | Tdrd3         | + |
| DMM5  | Cdkn2a <sup>-/-</sup> _C57 | SIN.LV.SF.GFP | LIVER          | 14 | 90126744  | + | NR_002862    | Gm5088        | + |
| DMM1  | Cdkn2a <sup>-/-</sup> _C57 | SIN.LV.SF.GFP | LIVER          | 14 | 93585795  | + | NM_001081377 | Pcdh9         | - |
| DMM14 | Cdkn2a <sup>-/-</sup> _C57 | SIN.LV.SF.GFP | SPLEEN         | 14 | 97885089  | + | NM_001038610 | Dach1         | - |
| DMM5  | Cdkn2a <sup>-/-</sup> _C57 | SIN.LV.SF.GFP | LIVER          | 14 | 99579565  | - | NM_029454    | Pibf1         | + |
| DMM7  | Cdkn2a <sup>-/-</sup> _C57 | SIN.LV.SF.GFP | LIVER          | 14 | 100446601 | + | NM_010636    | Klf12         | - |
| DMM14 | Cdkn2a <sup>-/-</sup> _C57 | SIN.LV.SF.GFP | LIVER          | 14 | 101909193 | - | NM_001081278 | Tbc1d4        | - |

|       |                            |               |                |    |           |   |              |         |   |
|-------|----------------------------|---------------|----------------|----|-----------|---|--------------|---------|---|
| DMM1  | Cdkn2a <sup>-/-</sup> _C57 | SIN.LV.SF.GFP | LIVER          | 14 | 101944922 | - | NM_001081278 | Tbc1d4  | - |
| DMM5  | Cdkn2a <sup>-/-</sup> _C57 | SIN.LV.SF.GFP | LIVER          | 14 | 103331358 | + | NM_177715    | Kctd12  | - |
| DMM8  | Cdkn2a <sup>-/-</sup> _C57 | SIN.LV.SF.GFP | LIVER          | 14 | 103518509 | + | NM_207215    | Mycbp2  | - |
| DMM3  | Cdkn2a <sup>-/-</sup> _C57 | SIN.LV.SF.GFP | LIVER          | 14 | 103558811 | - | NM_207215    | Mycbp2  | - |
| DMM5  | Cdkn2a <sup>-/-</sup> _C57 | SIN.LV.SF.GFP | SPLEEN         | 14 | 103666357 | + | NM_207215    | Mycbp2  | - |
| DMM1  | Cdkn2a <sup>-/-</sup> _C57 | SIN.LV.SF.GFP | LIVER          | 14 | 103722370 | + | NM_207215    | Mycbp2  | - |
| DMM18 | Cdkn2a <sup>-/-</sup> _C57 | SIN.LV.SF.GFP | SPLEEN         | 14 | 103820948 | - | NM_207215    | Mycbp2  | - |
| DMM7  | Cdkn2a <sup>-/-</sup> _C57 | SIN.LV.SF.GFP | LIVER          | 14 | 104062865 | - | NM_198014    | Slain1  | + |
| DMM5  | Cdkn2a <sup>-/-</sup> _C57 | SIN.LV.SF.GFP | LIVER          | 14 | 104217619 | + | NM_007904    | Ednrb   | - |
| DMM14 | Cdkn2a <sup>-/-</sup> _C57 | SIN.LV.SF.GFP | LIVER          | 14 | 105677553 | + | NM_029561    | Ndfip2  | + |
| DMM1  | Cdkn2a <sup>-/-</sup> _C57 | SIN.LV.SF.GFP | SPLEEN         | 14 | 105678023 | + | NM_029561    | Ndfip2  | + |
| DMM5  | Cdkn2a <sup>-/-</sup> _C57 | SIN.LV.SF.GFP | LIVER          | 14 | 106204887 | + | NM_011897    | Spry2   | - |
| DMM1  | Cdkn2a <sup>-/-</sup> _C57 | SIN.LV.SF.GFP | LIVER          | 14 | 106415311 | + | NM_198601    | Trim52  | + |
| DMM18 | Cdkn2a <sup>-/-</sup> _C57 | SIN.LV.SF.GFP | SPLEEN         | 14 | 107070567 | + | NM_198601    | Trim52  | + |
| DMM3  | Cdkn2a <sup>-/-</sup> _C57 | SIN.LV.SF.GFP | LIVER          | 14 | 107100022 | + | NM_198601    | Trim52  | + |
| DMM11 | Cdkn2a <sup>-/-</sup> _C57 | SIN.LV.SF.GFP | SPLEEN         | 14 | 107650749 | + | NM_198601    | Trim52  | + |
| DMM5  | Cdkn2a <sup>-/-</sup> _C57 | SIN.LV.SF.GFP | LIVER          | 14 | 111172620 | - | NM_175499    | Slitrk6 | - |
| DMM1  | Cdkn2a <sup>-/-</sup> _C57 | SIN.LV.SF.GFP | LIVER          | 14 | 111659375 | - | NM_198865    | Slitrk5 | + |
| DMM5  | Cdkn2a <sup>-/-</sup> _C57 | SIN.LV.SF.GFP | LIVER          | 14 | 118027097 | - | NM_001079844 | Gpc6    | + |
| DMM5  | Cdkn2a <sup>-/-</sup> _C57 | SIN.LV.SF.GFP | LIVER          | 14 | 118086193 | - | NM_001079844 | Gpc6    | + |
| DMM5  | Cdkn2a <sup>-/-</sup> _C57 | SIN.LV.SF.GFP | SPLEEN         | 14 | 118516327 | - | NM_029578    | Tgds    | - |
| DMM6  | Cdkn2a <sup>-/-</sup> _C57 | SIN.LV.SF.GFP | LIVER - SPLEEN | 14 | 120062521 | + | NM_015820    | Hs6st3  | + |
| DMM8  | Cdkn2a <sup>-/-</sup> _C57 | SIN.LV.SF.GFP | LIVER          | 14 | 120721227 | + | NM_175341    | Mbnl2   | + |
| DMM6  | Cdkn2a <sup>-/-</sup> _C57 | SIN.LV.SF.GFP | LIVER          | 14 | 122516502 | + | NM_080556    | Tm9sf2  | + |
| DMM1  | Cdkn2a <sup>-/-</sup> _C57 | SIN.LV.SF.GFP | LIVER          | 14 | 123047072 | - | NM_144844    | Pcca    | + |
| DMM1  | Cdkn2a <sup>-/-</sup> _C57 | SIN.LV.SF.GFP | LIVER          | 15 | 3216841   | - | NM_001042613 | Sepp1   | + |
| DMM14 | Cdkn2a <sup>-/-</sup> _C57 | SIN.LV.SF.GFP | LIVER          | 15 | 3226789   | - | NM_001042613 | Sepp1   | + |
| DMM5  | Cdkn2a <sup>-/-</sup> _C57 | SIN.LV.SF.GFP | LIVER          | 15 | 5964543   | + | NM_001008702 | Dab2    | + |
| DMM1  | Cdkn2a <sup>-/-</sup> _C57 | SIN.LV.SF.GFP | LIVER          | 15 | 6011013   | - | NM_001008702 | Dab2    | + |
| DMM5  | Cdkn2a <sup>-/-</sup> _C57 | SIN.LV.SF.GFP | LIVER          | 15 | 6676174   | + | NM_030168    | Rictor  | + |
| DMM3  | Cdkn2a <sup>-/-</sup> _C57 | SIN.LV.SF.GFP | LIVER          | 15 | 8356133   | + | NM_027707    | Nipbl   | - |

|       |                            |               |        |    |          |   |              |          |   |
|-------|----------------------------|---------------|--------|----|----------|---|--------------|----------|---|
| DMM1  | Cdkn2a <sup>-/-</sup> _C57 | SIN.LV.SF.GFP | LIVER  | 15 | 9105150  | - | NM_177178    | Lmbrd2   | + |
| DMM9  | Cdkn2a <sup>-/-</sup> _C57 | SIN.LV.SF.GFP | SPLEEN | 15 | 9111584  | + | NM_177178    | Lmbrd2   | + |
| DMM1  | Cdkn2a <sup>-/-</sup> _C57 | SIN.LV.SF.GFP | LIVER  | 15 | 12075460 | + | NM_011767    | Zfr      | + |
| DMM1  | Cdkn2a <sup>-/-</sup> _C57 | SIN.LV.SF.GFP | SPLEEN | 15 | 12108305 | + | NM_011767    | Zfr      | + |
| DMM14 | Cdkn2a <sup>-/-</sup> _C57 | SIN.LV.SF.GFP | LIVER  | 15 | 13304171 | - | NM_007666    | Cdh6     | - |
| DMM3  | Cdkn2a <sup>-/-</sup> _C57 | SIN.LV.SF.GFP | LIVER  | 15 | 15257255 | + | NM_009869    | Cdh9     | + |
| DMM18 | Cdkn2a <sup>-/-</sup> _C57 | SIN.LV.SF.GFP | SPLEEN | 15 | 16892012 | + | NM_009869    | Cdh9     | + |
| DMM5  | Cdkn2a <sup>-/-</sup> _C57 | SIN.LV.SF.GFP | LIVER  | 15 | 17530818 | - | NM_009869    | Cdh9     | + |
| DMM5  | Cdkn2a <sup>-/-</sup> _C57 | SIN.LV.SF.GFP | LIVER  | 15 | 18886347 | - | NM_009865    | Cdh10    | + |
| DMM13 | Cdkn2a <sup>-/-</sup> _C57 | SIN.LV.SF.GFP | LIVER  | 15 | 19710470 | + | NM_009865    | Cdh10    | + |
| DMM1  | Cdkn2a <sup>-/-</sup> _C57 | SIN.LV.SF.GFP | LIVER  | 15 | 19713604 | + | NM_009865    | Cdh10    | + |
| DMM1  | Cdkn2a <sup>-/-</sup> _C57 | SIN.LV.SF.GFP | LIVER  | 15 | 23363719 | + | NM_001081299 | Cdh18    | + |
| DMM1  | Cdkn2a <sup>-/-</sup> _C57 | SIN.LV.SF.GFP | SPLEEN | 15 | 25613105 | - | NM_019472    | Myo10    | + |
| DMM1  | Cdkn2a <sup>-/-</sup> _C57 | SIN.LV.SF.GFP | LIVER  | 15 | 27913239 | - | NM_001081302 | Trio     | - |
| DMM1  | Cdkn2a <sup>-/-</sup> _C57 | SIN.LV.SF.GFP | LIVER  | 15 | 28303098 | - | NM_133365    | Dnalc5   | + |
| DMM1  | Cdkn2a <sup>-/-</sup> _C57 | SIN.LV.SF.GFP | SPLEEN | 15 | 28323518 | - | NM_133365    | Dnalc5   | + |
| DMM7  | Cdkn2a <sup>-/-</sup> _C57 | SIN.LV.SF.GFP | LIVER  | 15 | 30732482 | - | NM_008729    | Ctnd2    | + |
| DMM14 | Cdkn2a <sup>-/-</sup> _C57 | SIN.LV.SF.GFP | LIVER  | 15 | 31276447 | - | NM_026153    | Ankrd33b | - |
| DMM14 | Cdkn2a <sup>-/-</sup> _C57 | SIN.LV.SF.GFP | LIVER  | 15 | 31420363 | - | NM_172606    | 6-Mar    | - |
| DMM3  | Cdkn2a <sup>-/-</sup> _C57 | SIN.LV.SF.GFP | LIVER  | 15 | 31435773 | - | NM_172606    | 6-Mar    | - |
| DMM5  | Cdkn2a <sup>-/-</sup> _C57 | SIN.LV.SF.GFP | LIVER  | 15 | 34009102 | + | NM_026002    | Mtdh     | + |
| DMM12 | Cdkn2a <sup>-/-</sup> _C57 | SIN.LV.SF.GFP | SPLEEN | 15 | 34036582 | - | NM_026002    | Mtdh     | + |
| DMM3  | Cdkn2a <sup>-/-</sup> _C57 | SIN.LV.SF.GFP | LIVER  | 15 | 35358010 | - | NM_177151    | Vps13b   | + |
| DMM3  | Cdkn2a <sup>-/-</sup> _C57 | SIN.LV.SF.GFP | LIVER  | 15 | 35444134 | - | NM_177151    | Vps13b   | + |
| DMM1  | Cdkn2a <sup>-/-</sup> _C57 | SIN.LV.SF.GFP | LIVER  | 15 | 35630613 | - | NM_177151    | Vps13b   | + |
| DMM18 | Cdkn2a <sup>-/-</sup> _C57 | SIN.LV.SF.GFP | SPLEEN | 15 | 37923746 | + | NM_001081359 | Ubr5     | - |
| DMM1  | Cdkn2a <sup>-/-</sup> _C57 | SIN.LV.SF.GFP | LIVER  | 15 | 38643912 | - | NM_025494    | Atp6v1c1 | + |
| DMM5  | Cdkn2a <sup>-/-</sup> _C57 | SIN.LV.SF.GFP | LIVER  | 15 | 38969471 | + | NM_198606    | Wdsof1   | + |
| DMM1  | Cdkn2a <sup>-/-</sup> _C57 | SIN.LV.SF.GFP | SPLEEN | 15 | 39612663 | - | NM_022722    | Dpys     | - |
| DMM1  | Cdkn2a <sup>-/-</sup> _C57 | SIN.LV.SF.GFP | LIVER  | 15 | 39805643 | - | NM_172814    | Lrp12    | - |
| DMM5  | Cdkn2a <sup>-/-</sup> _C57 | SIN.LV.SF.GFP | LIVER  | 15 | 41628070 | + | NM_001130163 | Oxr1     | + |

|       |                            |               |                |    |          |   |              |          |   |
|-------|----------------------------|---------------|----------------|----|----------|---|--------------|----------|---|
| DMM1  | Cdkn2a <sup>-/-</sup> _C57 | SIN.LV.SF.GFP | LIVER          | 15 | 42308487 | + | NM_009640    | Angpt1   | - |
| DMM5  | Cdkn2a <sup>-/-</sup> _C57 | SIN.LV.SF.GFP | LIVER          | 15 | 43326668 | + | NM_025736    | Ttc35    | + |
| DMM3  | Cdkn2a <sup>-/-</sup> _C57 | SIN.LV.SF.GFP | LIVER          | 15 | 44202642 | + | NM_001113554 | Nudcd1   | - |
| DMM1  | Cdkn2a <sup>-/-</sup> _C57 | SIN.LV.SF.GFP | LIVER          | 15 | 44461603 | + | NM_019480    | Ebag9    | + |
| DMM7  | Cdkn2a <sup>-/-</sup> _C57 | SIN.LV.SF.GFP | LIVER          | 15 | 47644649 | + | NM_001081391 | Csmd3    | - |
| DMM8  | Cdkn2a <sup>-/-</sup> _C57 | SIN.LV.SF.GFP | LIVER - SPLEEN | 15 | 49882980 | + | NM_032000    | Trps1    | - |
| DMM14 | Cdkn2a <sup>-/-</sup> _C57 | SIN.LV.SF.GFP | SPLEEN         | 15 | 50280418 | - | NM_032000    | Trps1    | - |
| DMM5  | Cdkn2a <sup>-/-</sup> _C57 | SIN.LV.SF.GFP | LIVER          | 15 | 50525732 | - | NM_032000    | Trps1    | - |
| DMM14 | Cdkn2a <sup>-/-</sup> _C57 | SIN.LV.SF.GFP | LIVER          | 15 | 50541273 | - | NM_032000    | Trps1    | - |
| DMM14 | Cdkn2a <sup>-/-</sup> _C57 | SIN.LV.SF.GFP | LIVER          | 15 | 50587134 | - | NM_032000    | Trps1    | - |
| DMM1  | Cdkn2a <sup>-/-</sup> _C57 | SIN.LV.SF.GFP | LIVER          | 15 | 50675726 | - | NM_032000    | Trps1    | - |
| DMM9  | Cdkn2a <sup>-/-</sup> _C57 | SIN.LV.SF.GFP | SPLEEN         | 15 | 52934164 | - | NM_010162    | Ext1     | - |
| DMM18 | Cdkn2a <sup>-/-</sup> _C57 | SIN.LV.SF.GFP | SPLEEN         | 15 | 53427716 | + | NM_177225    | Samd12   | - |
| DMM1  | Cdkn2a <sup>-/-</sup> _C57 | SIN.LV.SF.GFP | LIVER          | 15 | 54887726 | - | NM_001081288 | Taf2     | - |
| DMM11 | Cdkn2a <sup>-/-</sup> _C57 | SIN.LV.SF.GFP | LIVER - SPLEEN | 15 | 59606170 | - | NM_144549    | Trib1    | + |
| DMM9  | Cdkn2a <sup>-/-</sup> _C57 | SIN.LV.SF.GFP | LIVER          | 15 | 60617185 | - | NM_001081067 | A1bg     | - |
| DMM14 | Cdkn2a <sup>-/-</sup> _C57 | SIN.LV.SF.GFP | LIVER          | 15 | 61888140 | - | NR_003368    | Pvt1     | + |
| DMM14 | Cdkn2a <sup>-/-</sup> _C57 | SIN.LV.SF.GFP | LIVER          | 15 | 63211290 | - | NM_031378    | Gsdmc    | - |
| DMM1  | Cdkn2a <sup>-/-</sup> _C57 | SIN.LV.SF.GFP | LIVER          | 15 | 63799638 | + | NM_144846    | Fam49b   | - |
| DMM5  | Cdkn2a <sup>-/-</sup> _C57 | SIN.LV.SF.GFP | LIVER          | 15 | 66449120 | - | NM_001081409 | Phf2011  | + |
| DMM7  | Cdkn2a <sup>-/-</sup> _C57 | SIN.LV.SF.GFP | LIVER          | 15 | 68002311 | + | NM_001145888 | Zfat     | - |
| DMM1  | Cdkn2a <sup>-/-</sup> _C57 | SIN.LV.SF.GFP | LIVER          | 15 | 68158234 | + | NM_001145888 | Zfat     | - |
| DMM5  | Cdkn2a <sup>-/-</sup> _C57 | SIN.LV.SF.GFP | LIVER          | 15 | 72655571 | - | NM_029640    | Trappc9  | - |
| DMM5  | Cdkn2a <sup>-/-</sup> _C57 | SIN.LV.SF.GFP | LIVER          | 15 | 86257460 | - | NM_145476    | Tbc1d22a | + |
| DMM11 | Cdkn2a <sup>-/-</sup> _C57 | SIN.LV.SF.GFP | SPLEEN         | 15 | 89941529 | + | NM_001033441 | Alg10b   | + |
| DMM5  | Cdkn2a <sup>-/-</sup> _C57 | SIN.LV.SF.GFP | LIVER          | 15 | 93130716 | + | NM_024189    | Yaf2     | - |
| DMM18 | Cdkn2a <sup>-/-</sup> _C57 | SIN.LV.SF.GFP | LIVER          | 15 | 96999872 | + | NM_178114    | Amigo2   | - |
| DMM3  | Cdkn2a <sup>-/-</sup> _C57 | SIN.LV.SF.GFP | LIVER          | 15 | 97269541 | - | NM_172293    | Fam113b  | + |
| DMM1  | Cdkn2a <sup>-/-</sup> _C57 | SIN.LV.SF.GFP | LIVER          | 15 | 99221709 | + | NM_026669    | Tmbim6   | + |
| DMM5  | Cdkn2a <sup>-/-</sup> _C57 | SIN.LV.SF.GFP | LIVER          | 16 | 11834891 | + | NM_146067    | Cpped1   | - |
| DMM14 | Cdkn2a <sup>-/-</sup> _C57 | SIN.LV.SF.GFP | SPLEEN         | 16 | 13622237 | - | NM_028761    | Parn     | - |

|       |                            |               |              |    |          |   |              |         |   |
|-------|----------------------------|---------------|--------------|----|----------|---|--------------|---------|---|
| DMM5  | Cdkn2a <sup>-/-</sup> _C57 | SIN.LV.SF.GFP | LIVER        | 16 | 13890141 | + | NM_001039533 | Pdxdc1  | - |
| DMM9  | Cdkn2a <sup>-/-</sup> _C57 | SIN.LV.SF.GFP | SPLEEN       | 16 | 16336851 | + | NM_001025947 | Dnm11   | - |
| DMM5  | Cdkn2a <sup>-/-</sup> _C57 | SIN.LV.SF.GFP | LIVER        | 16 | 17700302 | - | NM_001040683 | Med15   | - |
| DMM5  | Cdkn2a <sup>-/-</sup> _C57 | SIN.LV.SF.GFP | LIVER        | 16 | 17987290 | - | NM_016983    | Vpreb2  | + |
| DMM3  | Cdkn2a <sup>-/-</sup> _C57 | SIN.LV.SF.GFP | LIVER        | 16 | 18923639 | - | NM_010435    | Hira    | + |
| DMM14 | Cdkn2a <sup>-/-</sup> _C57 | SIN.LV.SF.GFP | SPLEEN       | 16 | 18940477 | - | NM_010435    | Hira    | + |
| DMM5  | Cdkn2a <sup>-/-</sup> _C57 | SIN.LV.SF.GFP | LIVER        | 16 | 23321609 | - | NM_145933    | St6gal1 | + |
| DMM3  | Cdkn2a <sup>-/-</sup> _C57 | SIN.LV.SF.GFP | LIVER        | 16 | 23352413 | + | NM_145933    | St6gal1 | + |
| DMM3  | Cdkn2a <sup>-/-</sup> _C57 | SIN.LV.SF.GFP | VER - SPLEEN | 16 | 23628721 | + | NM_023386    | Rtp4    | + |
| DMM5  | Cdkn2a <sup>-/-</sup> _C57 | SIN.LV.SF.GFP | LIVER        | 16 | 24733440 | + | NM_001145954 | Lpp     | + |
| DMM3  | Cdkn2a <sup>-/-</sup> _C57 | SIN.LV.SF.GFP | LIVER        | 16 | 25805803 | + | NM_001127262 | Trp63   | + |
| DMM3  | Cdkn2a <sup>-/-</sup> _C57 | SIN.LV.SF.GFP | LIVER        | 16 | 26039405 | - | NM_173379    | Leprel1 | - |
| DMM3  | Cdkn2a <sup>-/-</sup> _C57 | SIN.LV.SF.GFP | LIVER        | 16 | 26292691 | - | NM_016674    | Cldn1   | - |
| DMM3  | Cdkn2a <sup>-/-</sup> _C57 | SIN.LV.SF.GFP | LIVER        | 16 | 27403802 | - | NM_001025615 | Ccdc50  | + |
| DMM1  | Cdkn2a <sup>-/-</sup> _C57 | SIN.LV.SF.GFP | LIVER        | 16 | 31803693 | - | NM_007862    | Dlg1    | + |
| DMM3  | Cdkn2a <sup>-/-</sup> _C57 | SIN.LV.SF.GFP | LIVER        | 16 | 32942852 | + | NM_001081255 | Lrch3   | + |
| DMM14 | Cdkn2a <sup>-/-</sup> _C57 | SIN.LV.SF.GFP | LIVER        | 16 | 35898728 | + | NM_001039530 | Parp14  | - |
| DMM7  | Cdkn2a <sup>-/-</sup> _C57 | SIN.LV.SF.GFP | SPLEEN       | 16 | 36004740 | + | NM_008465    | Kpna1   | + |
| DMM1  | Cdkn2a <sup>-/-</sup> _C57 | SIN.LV.SF.GFP | LIVER        | 16 | 36015343 | - | NM_008465    | Kpna1   | + |
| DMM14 | Cdkn2a <sup>-/-</sup> _C57 | SIN.LV.SF.GFP | LIVER        | 16 | 36657495 | - | NM_019388    | Cd86    | - |
| DMM5  | Cdkn2a <sup>-/-</sup> _C57 | SIN.LV.SF.GFP | VER - SPLEEN | 16 | 38179704 | - | NM_019827    | Gsk3b   | + |
| DMM14 | Cdkn2a <sup>-/-</sup> _C57 | SIN.LV.SF.GFP | SPLEEN       | 16 | 39199656 | + | NM_170599    | Igsf11  | + |
| DMM1  | Cdkn2a <sup>-/-</sup> _C57 | SIN.LV.SF.GFP | LIVER        | 16 | 41631454 | - | NM_175548    | Lsamp   | + |
| DMM7  | Cdkn2a <sup>-/-</sup> _C57 | SIN.LV.SF.GFP | SPLEEN       | 16 | 43303945 | + | NM_019778    | Zbtb20  | + |
| DMM2  | Cdkn2a <sup>-/-</sup> _C57 | SIN.LV.SF.GFP | SPLEEN       | 16 | 43378778 | + | NM_019778    | Zbtb20  | + |
| DMM5  | Cdkn2a <sup>-/-</sup> _C57 | SIN.LV.SF.GFP | LIVER        | 16 | 43387222 | + | NM_019778    | Zbtb20  | + |
| DMM14 | Cdkn2a <sup>-/-</sup> _C57 | SIN.LV.SF.GFP | LIVER        | 16 | 44112884 | - | NM_007508    | Atp6v1a | - |
| DMM8  | Cdkn2a <sup>-/-</sup> _C57 | SIN.LV.SF.GFP | VER - SPLEEN | 16 | 44967122 | + | NM_027578    | Cd200r3 | + |
| DMM8  | Cdkn2a <sup>-/-</sup> _C57 | SIN.LV.SF.GFP | VER - SPLEEN | 16 | 44967167 | - | NM_027578    | Cd200r3 | + |
| DMM12 | Cdkn2a <sup>-/-</sup> _C57 | SIN.LV.SF.GFP | VER - SPLEEN | 16 | 45284780 | + | NM_001037719 | Btla    | + |
| DMM3  | Cdkn2a <sup>-/-</sup> _C57 | SIN.LV.SF.GFP | LIVER        | 16 | 48819134 | + | NM_023881    | Retnlb  | + |

|       |                            |               |              |    |          |   |              |         |   |
|-------|----------------------------|---------------|--------------|----|----------|---|--------------|---------|---|
| DMM5  | Cdkn2a <sup>-/-</sup> _C57 | SIN.LV.SF.GFP | LIVER        | 16 | 48926618 | - | NM_001110017 | Dzip3   | - |
| DMM1  | Cdkn2a <sup>-/-</sup> _C57 | SIN.LV.SF.GFP | LIVER        | 16 | 48949057 | - | NM_001110017 | Dzip3   | - |
| DMM9  | Cdkn2a <sup>-/-</sup> _C57 | SIN.LV.SF.GFP | LIVER        | 16 | 48980799 | + | NM_001110017 | Dzip3   | - |
| DMM2  | Cdkn2a <sup>-/-</sup> _C57 | SIN.LV.SF.GFP | LIVER        | 16 | 50259655 | + | NM_027444    | Bbx     | - |
| DMM14 | Cdkn2a <sup>-/-</sup> _C57 | SIN.LV.SF.GFP | SPLEEN       | 16 | 50270726 | + | NM_027444    | Bbx     | - |
| DMM3  | Cdkn2a <sup>-/-</sup> _C57 | SIN.LV.SF.GFP | LIVER        | 16 | 50870979 | - | NM_027046    | Ccdc54  | - |
| DMM4  | Cdkn2a <sup>-/-</sup> _C57 | SIN.LV.SF.GFP | SPLEEN       | 16 | 52041273 | + | NM_001033238 | Cblb    | + |
| DMM14 | Cdkn2a <sup>-/-</sup> _C57 | SIN.LV.SF.GFP | LIVER        | 16 | 56005504 | - | NM_001024622 | Pcnp    | - |
| DMM3  | Cdkn2a <sup>-/-</sup> _C57 | SIN.LV.SF.GFP | LIVER        | 16 | 56092202 | + | NM_001003971 | Senp7   | + |
| DMM5  | Cdkn2a <sup>-/-</sup> _C57 | SIN.LV.SF.GFP | LIVER        | 16 | 56111930 | - | NM_001003972 | Senp7   | + |
| DMM1  | Cdkn2a <sup>-/-</sup> _C57 | SIN.LV.SF.GFP | LIVER        | 16 | 56693193 | - | NM_019678    | Tfg     | - |
| DMM3  | Cdkn2a <sup>-/-</sup> _C57 | SIN.LV.SF.GFP | LIVER        | 16 | 57513383 | + | NM_030163    | Filip11 | + |
| DMM5  | Cdkn2a <sup>-/-</sup> _C57 | SIN.LV.SF.GFP | LIVER        | 16 | 58601015 | - | NM_001033404 | Gm813   | - |
| DMM1  | Cdkn2a <sup>-/-</sup> _C57 | SIN.LV.SF.GFP | LIVER        | 16 | 59626708 | - | NM_019665    | Arl6    | - |
| DMM18 | Cdkn2a <sup>-/-</sup> _C57 | SIN.LV.SF.GFP | SPLEEN       | 16 | 62739798 | + | NM_178925    | Nsun3   | - |
| DMM3  | Cdkn2a <sup>-/-</sup> _C57 | SIN.LV.SF.GFP | LIVER        | 16 | 62801782 | + | NM_026577    | Arl13b  | - |
| DMM9  | Cdkn2a <sup>-/-</sup> _C57 | SIN.LV.SF.GFP | LIVER        | 16 | 62923944 | - | NM_011173    | Pros1   | + |
| DMM1  | Cdkn2a <sup>-/-</sup> _C57 | SIN.LV.SF.GFP | LIVER        | 16 | 63782429 | - | NM_010140    | Epha3   | - |
| DMM14 | Cdkn2a <sup>-/-</sup> _C57 | SIN.LV.SF.GFP | LIVER        | 16 | 64824286 | - | NM_178647    | Cggbp1  | + |
| DMM3  | Cdkn2a <sup>-/-</sup> _C57 | SIN.LV.SF.GFP | LIVER        | 16 | 64855354 | - | NM_178647    | Cggbp1  | + |
| DMM5  | Cdkn2a <sup>-/-</sup> _C57 | SIN.LV.SF.GFP | LIVER        | 16 | 65195282 | - | NM_008310    | Htr1f   | - |
| DMM12 | Cdkn2a <sup>-/-</sup> _C57 | SIN.LV.SF.GFP | VER - SPLEEN | 16 | 70325870 | + | NM_028803    | Gbe1    | + |
| DMM5  | Cdkn2a <sup>-/-</sup> _C57 | SIN.LV.SF.GFP | LIVER        | 16 | 70344555 | + | NM_028803    | Gbe1    | + |
| DMM6  | Cdkn2a <sup>-/-</sup> _C57 | SIN.LV.SF.GFP | VER - SPLEEN | 16 | 70351653 | + | NM_028803    | Gbe1    | + |
| DMM6  | Cdkn2a <sup>-/-</sup> _C57 | SIN.LV.SF.GFP | VER - SPLEEN | 16 | 70351728 | - | NM_028803    | Gbe1    | + |
| DMM6  | Cdkn2a <sup>-/-</sup> _C57 | SIN.LV.SF.GFP | VER - SPLEEN | 16 | 70351744 | - | NM_028803    | Gbe1    | + |
| DMM1  | Cdkn2a <sup>-/-</sup> _C57 | SIN.LV.SF.GFP | LIVER        | 16 | 70363423 | - | NM_028803    | Gbe1    | + |
| DMM3  | Cdkn2a <sup>-/-</sup> _C57 | SIN.LV.SF.GFP | LIVER        | 16 | 70403069 | + | NM_028803    | Gbe1    | + |
| DMM5  | Cdkn2a <sup>-/-</sup> _C57 | SIN.LV.SF.GFP | LIVER        | 16 | 70459787 | - | NM_028803    | Gbe1    | + |
| DMM3  | Cdkn2a <sup>-/-</sup> _C57 | SIN.LV.SF.GFP | LIVER        | 16 | 70561179 | + | NM_028803    | Gbe1    | + |
| DMM5  | Cdkn2a <sup>-/-</sup> _C57 | SIN.LV.SF.GFP | LIVER        | 16 | 70695508 | - | NM_028803    | Gbe1    | + |

|       |                            |               |             |    |          |   |              |           |   |
|-------|----------------------------|---------------|-------------|----|----------|---|--------------|-----------|---|
| DMM3  | Cdkn2a <sup>-/-</sup> _C57 | SIN.LV.SF.GFP | LIVER       | 16 | 73593958 | + | NM_175549    | Robo2     | - |
| DMM1  | Cdkn2a <sup>-/-</sup> _C57 | SIN.LV.SF.GFP | SPLEEN      | 16 | 73773419 | - | NM_175549    | Robo2     | - |
| DMM1  | Cdkn2a <sup>-/-</sup> _C57 | SIN.LV.SF.GFP | LIVER       | 16 | 73773975 | + | NM_175549    | Robo2     | - |
| DMM1  | Cdkn2a <sup>-/-</sup> _C57 | SIN.LV.SF.GFP | LIVER       | 16 | 76041211 | - | NM_023380    | Samsn1    | - |
| DMM14 | Cdkn2a <sup>-/-</sup> _C57 | SIN.LV.SF.GFP | LIVER       | 16 | 77407713 | - | NM_013918    | Usp25     | + |
| DMM3  | Cdkn2a <sup>-/-</sup> _C57 | SIN.LV.SF.GFP | LIVER       | 16 | 81351275 | + | NM_001113208 | Ncam2     | + |
| DMM1  | Cdkn2a <sup>-/-</sup> _C57 | SIN.LV.SF.GFP | LIVER       | 16 | 81406924 | + | NM_010954    | Ncam2     | + |
| DMM3  | Cdkn2a <sup>-/-</sup> _C57 | SIN.LV.SF.GFP | LIVER       | 16 | 81448289 | + | NM_010954    | Ncam2     | + |
| DMM14 | Cdkn2a <sup>-/-</sup> _C57 | SIN.LV.SF.GFP | LIVER       | 16 | 81452538 | + | NM_010954    | Ncam2     | + |
| DMM14 | Cdkn2a <sup>-/-</sup> _C57 | SIN.LV.SF.GFP | LIVER       | 16 | 85323814 | + | NM_144853    | Cyrr1     | - |
| DMM7  | Cdkn2a <sup>-/-</sup> _C57 | SIN.LV.SF.GFP | LIVER       | 16 | 86773951 | - | NM_001159331 | N6amt1    | + |
| DMM3  | Cdkn2a <sup>-/-</sup> _C57 | SIN.LV.SF.GFP | LIVER       | 16 | 87400595 | + | NM_001081068 | Rnf160    | - |
| DMM1  | Cdkn2a <sup>-/-</sup> _C57 | SIN.LV.SF.GFP | LIVER       | 16 | 87490736 | - | NM_009840    | Cct8      | - |
| DMM5  | Cdkn2a <sup>-/-</sup> _C57 | SIN.LV.SF.GFP | LIVER       | 16 | 88487496 | - | NM_181490    | Cldn17    | - |
| DMM3  | Cdkn2a <sup>-/-</sup> _C57 | SIN.LV.SF.GFP | LIVER       | 16 | 88699023 | + | NM_183189    | Krtap13-1 | + |
| DMM1  | Cdkn2a <sup>-/-</sup> _C57 | SIN.LV.SF.GFP | LIVER       | 16 | 91670601 | + | NM_178880    | Son       | + |
| DMM8  | Cdkn2a <sup>-/-</sup> _C57 | SIN.LV.SF.GFP | LIVER       | 16 | 97138538 | - | NM_031174    | Dscam     | - |
| DMM1  | Cdkn2a <sup>-/-</sup> _C57 | SIN.LV.SF.GFP | LIVER       | 17 | 4276429  | + | NM_198958    | Nox3      | - |
| DMM6  | Cdkn2a <sup>-/-</sup> _C57 | SIN.LV.SF.GFP | SPLEEN      | 17 | 5575846  | + | NM_146073    | Zdhhc14   | + |
| DMM1  | Cdkn2a <sup>-/-</sup> _C57 | SIN.LV.SF.GFP | LIVER       | 17 | 5876744  | + | NM_025664    | Snx9      | + |
| DMM6  | Cdkn2a <sup>-/-</sup> _C57 | SIN.LV.SF.GFP | SPLEEN      | 17 | 10414394 | + | NM_001159516 | Qk        | - |
| DMM8  | Cdkn2a <sup>-/-</sup> _C57 | SIN.LV.SF.GFP | VER - SPLEE | 17 | 10471939 | - | NM_001159516 | Qk        | - |
| DMM18 | Cdkn2a <sup>-/-</sup> _C57 | SIN.LV.SF.GFP | LIVER       | 17 | 10964555 | - | NM_027032    | Pacrg     | - |
| DMM5  | Cdkn2a <sup>-/-</sup> _C57 | SIN.LV.SF.GFP | LIVER       | 17 | 15084643 | + | NM_024250    | Phf10     | - |
| DMM9  | Cdkn2a <sup>-/-</sup> _C57 | SIN.LV.SF.GFP | LIVER       | 17 | 15520323 | + | NM_007865    | Dll1      | - |
| DMM4  | Cdkn2a <sup>-/-</sup> _C57 | SIN.LV.SF.GFP | SPLEEN      | 17 | 15957587 | + | NM_178615    | Rgmb      | - |
| DMM1  | Cdkn2a <sup>-/-</sup> _C57 | SIN.LV.SF.GFP | LIVER       | 17 | 17683190 | - | NM_172827    | Lnpep     | - |
| DMM5  | Cdkn2a <sup>-/-</sup> _C57 | SIN.LV.SF.GFP | LIVER       | 17 | 17740649 | - | NM_172827    | Lnpep     | - |
| DMM1  | Cdkn2a <sup>-/-</sup> _C57 | SIN.LV.SF.GFP | LIVER       | 17 | 21568613 | + | NM_011760    | Zfp54     | + |
| DMM4  | Cdkn2a <sup>-/-</sup> _C57 | SIN.LV.SF.GFP | SPLEEN      | 17 | 21676288 | + | NM_144515    | Zfp52     | + |
| DMM5  | Cdkn2a <sup>-/-</sup> _C57 | SIN.LV.SF.GFP | LIVER       | 17 | 21880964 | + | NM_001008501 | Zfp760    | + |



|       |                            |               |              |    |          |   |              |               |   |
|-------|----------------------------|---------------|--------------|----|----------|---|--------------|---------------|---|
| DMM5  | Cdkn2a <sup>-/-</sup> _C57 | SIN.LV.SF.GFP | LIVER        | 17 | 22130496 | + | NM_001025373 | 4930432O21Rik | + |
| DMM3  | Cdkn2a <sup>-/-</sup> _C57 | SIN.LV.SF.GFP | LIVER        | 17 | 23326045 | - | NM_009555    | Zfp40         | - |
| DMM14 | Cdkn2a <sup>-/-</sup> _C57 | SIN.LV.SF.GFP | LIVER        | 17 | 23412805 | - | NM_001102584 | Vmn2r114      | - |
| DMM5  | Cdkn2a <sup>-/-</sup> _C57 | SIN.LV.SF.GFP | LIVER        | 17 | 23950069 | + | NM_175229    | Srrm2         | + |
| DMM3  | Cdkn2a <sup>-/-</sup> _C57 | SIN.LV.SF.GFP | LIVER        | 17 | 29137992 | - | NM_134115    | Stk38         | - |
| DMM1  | Cdkn2a <sup>-/-</sup> _C57 | SIN.LV.SF.GFP | LIVER        | 17 | 32749023 | - | NM_001100187 | 677156        | + |
| DMM8  | Cdkn2a <sup>-/-</sup> _C57 | SIN.LV.SF.GFP | VER - SPLEEN | 17 | 36968841 | - | NM_001025599 | Trim26        | + |
| DMM7  | Cdkn2a <sup>-/-</sup> _C57 | SIN.LV.SF.GFP | SPLEEN       | 17 | 37107816 | - | NM_029602    | 1700022C21Rik | + |
| DMM5  | Cdkn2a <sup>-/-</sup> _C57 | SIN.LV.SF.GFP | LIVER        | 17 | 37703506 | + | NM_001013575 | Olf112        | - |
| DMM9  | Cdkn2a <sup>-/-</sup> _C57 | SIN.LV.SF.GFP | SPLEEN       | 17 | 37714293 | - | NM_146289    | Olf113        | - |
| DMM14 | Cdkn2a <sup>-/-</sup> _C57 | SIN.LV.SF.GFP | LIVER        | 17 | 37802154 | - | NM_207155    | Olf117        | - |
| DMM9  | Cdkn2a <sup>-/-</sup> _C57 | SIN.LV.SF.GFP | SPLEEN       | 17 | 42079344 | + | NM_181753    | Opn5          | - |
| DMM3  | Cdkn2a <sup>-/-</sup> _C57 | SIN.LV.SF.GFP | LIVER        | 17 | 42957135 | + | NM_009847    | Cd2ap         | - |
| DMM3  | Cdkn2a <sup>-/-</sup> _C57 | SIN.LV.SF.GFP | LIVER        | 17 | 42995592 | - | NM_009847    | Cd2ap         | - |
| DMM2  | Cdkn2a <sup>-/-</sup> _C57 | SIN.LV.SF.GFP | SPLEEN       | 17 | 42998215 | - | NM_009847    | Cd2ap         | - |
| DMM7  | Cdkn2a <sup>-/-</sup> _C57 | SIN.LV.SF.GFP | LIVER        | 17 | 46987204 | - | NM_001100452 | BC032203      | - |
| DMM18 | Cdkn2a <sup>-/-</sup> _C57 | SIN.LV.SF.GFP | LIVER        | 17 | 50684179 | - | NM_013880    | Plcl2         | + |
| DMM5  | Cdkn2a <sup>-/-</sup> _C57 | SIN.LV.SF.GFP | LIVER        | 17 | 51201870 | - | NM_028162    | Tbc1d5        | - |
| DMM14 | Cdkn2a <sup>-/-</sup> _C57 | SIN.LV.SF.GFP | LIVER        | 17 | 51232097 | + | NM_028162    | Tbc1d5        | - |
| DMM3  | Cdkn2a <sup>-/-</sup> _C57 | SIN.LV.SF.GFP | LIVER        | 17 | 51906093 | - | NM_009122    | Satb1         | - |
| DMM2  | Cdkn2a <sup>-/-</sup> _C57 | SIN.LV.SF.GFP | LIVER        | 17 | 52859165 | - | NM_001031811 | Kcnh8         | + |
| DMM1  | Cdkn2a <sup>-/-</sup> _C57 | SIN.LV.SF.GFP | LIVER        | 17 | 53726219 | + | NM_020005    | Kat2b         | + |
| DMM5  | Cdkn2a <sup>-/-</sup> _C57 | SIN.LV.SF.GFP | LIVER        | 17 | 53789652 | - | NM_020005    | Kat2b         | + |
| DMM3  | Cdkn2a <sup>-/-</sup> _C57 | SIN.LV.SF.GFP | LIVER        | 17 | 55927709 | - | NM_139138    | Emr4          | + |
| DMM14 | Cdkn2a <sup>-/-</sup> _C57 | SIN.LV.SF.GFP | LIVER        | 17 | 57435709 | + | NM_011691    | Vav1          | + |
| DMM7  | Cdkn2a <sup>-/-</sup> _C57 | SIN.LV.SF.GFP | LIVER        | 17 | 64244332 | - | NM_001037997 | Fert2         | + |
| DMM14 | Cdkn2a <sup>-/-</sup> _C57 | SIN.LV.SF.GFP | SPLEEN       | 17 | 65082841 | + | NM_008549    | Man2a1        | + |
| DMM9  | Cdkn2a <sup>-/-</sup> _C57 | SIN.LV.SF.GFP | LIVER        | 17 | 66094465 | + | NM_133685    | Rab31         | - |
| DMM18 | Cdkn2a <sup>-/-</sup> _C57 | SIN.LV.SF.GFP | SPLEEN       | 17 | 66846975 | + | NM_024448    | Rab12         | - |
| DMM5  | Cdkn2a <sup>-/-</sup> _C57 | SIN.LV.SF.GFP | LIVER        | 17 | 73395460 | - | NM_001081071 | Lclat1        | + |
| DMM1  | Cdkn2a <sup>-/-</sup> _C57 | SIN.LV.SF.GFP | LIVER        | 17 | 74270159 | + | NM_011723    | Xdh           | - |

|       |                            |               |             |    |          |   |              |               |   |
|-------|----------------------------|---------------|-------------|----|----------|---|--------------|---------------|---|
| DMM14 | Cdkn2a <sup>-/-</sup> _C57 | SIN.LV.SF.GFP | LIVER       | 17 | 74615723 | - | NM_133771    | Memol         | - |
| DMM1  | Cdkn2a <sup>-/-</sup> _C57 | SIN.LV.SF.GFP | LIVER       | 17 | 74651433 | + | NM_133771    | Memol         | - |
| DMM14 | Cdkn2a <sup>-/-</sup> _C57 | SIN.LV.SF.GFP | LIVER       | 17 | 75051242 | - | NM_007566    | Birc6         | + |
| DMM8  | Cdkn2a <sup>-/-</sup> _C57 | SIN.LV.SF.GFP | VER - SPLEE | 17 | 77223474 | - | NM_133747    | Fam98a        | - |
| DMM1  | Cdkn2a <sup>-/-</sup> _C57 | SIN.LV.SF.GFP | LIVER       | 17 | 78767472 | + | NM_015800    | Crim1         | + |
| DMM2  | Cdkn2a <sup>-/-</sup> _C57 | SIN.LV.SF.GFP | LIVER       | 17 | 80273771 | + | NM_019717    | Atl2          | - |
| DMM9  | Cdkn2a <sup>-/-</sup> _C57 | SIN.LV.SF.GFP | LIVER       | 17 | 81081263 | + | NM_001081357 | Map4k3        | - |
| DMM7  | Cdkn2a <sup>-/-</sup> _C57 | SIN.LV.SF.GFP | LIVER       | 17 | 81118789 | - | NM_001081357 | Map4k3        | - |
| DMM14 | Cdkn2a <sup>-/-</sup> _C57 | SIN.LV.SF.GFP | LIVER       | 17 | 82049643 | - | NM_001112798 | Slc8a1        | - |
| DMM5  | Cdkn2a <sup>-/-</sup> _C57 | SIN.LV.SF.GFP | LIVER       | 17 | 82096442 | + | NM_001112798 | Slc8a1        | - |
| DMM18 | Cdkn2a <sup>-/-</sup> _C57 | SIN.LV.SF.GFP | SPLEEN      | 17 | 82325041 | - | NM_001112798 | Slc8a1        | - |
| DMM1  | Cdkn2a <sup>-/-</sup> _C57 | SIN.LV.SF.GFP | LIVER       | 17 | 88118334 | - | NM_008628    | Msh2          | + |
| DMM3  | Cdkn2a <sup>-/-</sup> _C57 | SIN.LV.SF.GFP | LIVER       | 17 | 88461480 | - | NM_001081034 | Fbxo11        | - |
| DMM5  | Cdkn2a <sup>-/-</sup> _C57 | SIN.LV.SF.GFP | LIVER       | 17 | 88536556 | + | NM_001081034 | Fbxo11        | - |
| DMM3  | Cdkn2a <sup>-/-</sup> _C57 | SIN.LV.SF.GFP | LIVER       | 17 | 88882102 | - | NM_180974    | Foxn2         | + |
| DMM1  | Cdkn2a <sup>-/-</sup> _C57 | SIN.LV.SF.GFP | SPLEEN      | 17 | 89640394 | - | NM_013523    | Fshr          | - |
| DMM8  | Cdkn2a <sup>-/-</sup> _C57 | SIN.LV.SF.GFP | LIVER       | 17 | 95152232 | - | NR_024720    | 2700099C18Rik | + |
| DMM14 | Cdkn2a <sup>-/-</sup> _C57 | SIN.LV.SF.GFP | LIVER       | 18 | 3290157  | - | NM_001110853 | Crem          | - |
| DMM14 | Cdkn2a <sup>-/-</sup> _C57 | SIN.LV.SF.GFP | LIVER       | 18 | 3290741  | - | NM_001110853 | Crem          | - |
| DMM5  | Cdkn2a <sup>-/-</sup> _C57 | SIN.LV.SF.GFP | LIVER       | 18 | 3396076  | + | NM_029402    | Cul2          | + |
| DMM14 | Cdkn2a <sup>-/-</sup> _C57 | SIN.LV.SF.GFP | LIVER       | 18 | 4316522  | - | NM_007746    | Map3k8        | - |
| DMM13 | Cdkn2a <sup>-/-</sup> _C57 | SIN.LV.SF.GFP | LIVER       | 18 | 4332084  | + | NM_007746    | Map3k8        | - |
| DMM6  | Cdkn2a <sup>-/-</sup> _C57 | SIN.LV.SF.GFP | LIVER       | 18 | 4332119  | + | NM_007746    | Map3k8        | - |
| DMM13 | Cdkn2a <sup>-/-</sup> _C57 | SIN.LV.SF.GFP | LIVER       | 18 | 4332185  | + | NM_007746    | Map3k8        | - |
| DMM6  | Cdkn2a <sup>-/-</sup> _C57 | SIN.LV.SF.GFP | VER - SPLEE | 18 | 4332367  | - | NM_007746    | Map3k8        | - |
| DMM13 | Cdkn2a <sup>-/-</sup> _C57 | SIN.LV.SF.GFP | VER - SPLEE | 18 | 4332379  | - | NM_007746    | Map3k8        | - |
| DMM1  | Cdkn2a <sup>-/-</sup> _C57 | SIN.LV.SF.GFP | SPLEEN      | 18 | 4332384  | - | NM_007746    | Map3k8        | - |
| DMM11 | Cdkn2a <sup>-/-</sup> _C57 | SIN.LV.SF.GFP | LIVER       | 18 | 4333413  | + | NM_007746    | Map3k8        | - |
| DMM11 | Cdkn2a <sup>-/-</sup> _C57 | SIN.LV.SF.GFP | LIVER       | 18 | 4333455  | + | NM_007746    | Map3k8        | - |
| DMM11 | Cdkn2a <sup>-/-</sup> _C57 | SIN.LV.SF.GFP | LIVER       | 18 | 4333515  | + | NM_007746    | Map3k8        | - |
| DMM11 | Cdkn2a <sup>-/-</sup> _C57 | SIN.LV.SF.GFP | LIVER       | 18 | 4333544  | + | NM_007746    | Map3k8        | - |

|       |                            |               |                  |    |          |   |              |               |   |
|-------|----------------------------|---------------|------------------|----|----------|---|--------------|---------------|---|
| DMM1  | Cdkn2a <sup>-/-</sup> _C57 | SIN.LV.SF.GFP | LIVER            | 18 | 4333636  | - | NM_007746    | Map3k8        | - |
| DMM11 | Cdkn2a <sup>-/-</sup> _C57 | SIN.LV.SF.GFP | - LIVER - SPLEEN | 18 | 4333646  | - | NM_007746    | Map3k8        | - |
| DMM12 | Cdkn2a <sup>-/-</sup> _C57 | SIN.LV.SF.GFP | VER - SPLEEN     | 18 | 4333881  | - | NM_007746    | Map3k8        | - |
| DMM1  | Cdkn2a <sup>-/-</sup> _C57 | SIN.LV.SF.GFP | LIVER            | 18 | 7516028  | + | NM_001081287 | Mpp7          | - |
| DMM7  | Cdkn2a <sup>-/-</sup> _C57 | SIN.LV.SF.GFP | LIVER            | 18 | 7644421  | - | NM_001081287 | Mpp7          | - |
| DMM5  | Cdkn2a <sup>-/-</sup> _C57 | SIN.LV.SF.GFP | SPLEEN           | 18 | 10135621 | - | NM_009071    | Rock1         | - |
| DMM14 | Cdkn2a <sup>-/-</sup> _C57 | SIN.LV.SF.GFP | LIVER            | 18 | 14384842 | - | NM_145492    | Zfp521        | - |
| DMM9  | Cdkn2a <sup>-/-</sup> _C57 | SIN.LV.SF.GFP | SPLEEN           | 18 | 14952657 | - | NM_001100449 | Taf4b         | + |
| DMM1  | Cdkn2a <sup>-/-</sup> _C57 | SIN.LV.SF.GFP | LIVER            | 18 | 15060013 | + | NM_001100449 | Taf4b         | + |
| DMM3  | Cdkn2a <sup>-/-</sup> _C57 | SIN.LV.SF.GFP | LIVER            | 18 | 17403017 | + | NM_007664    | Cdh2          | - |
| DMM1  | Cdkn2a <sup>-/-</sup> _C57 | SIN.LV.SF.GFP | LIVER            | 18 | 17419954 | - | NM_007664    | Cdh2          | - |
| DMM5  | Cdkn2a <sup>-/-</sup> _C57 | SIN.LV.SF.GFP | LIVER            | 18 | 20968084 | - | NM_029491    | D030074E01Rik | - |
| DMM1  | Cdkn2a <sup>-/-</sup> _C57 | SIN.LV.SF.GFP | LIVER            | 18 | 20996273 | - | NM_029491    | D030074E01Rik | - |
| DMM8  | Cdkn2a <sup>-/-</sup> _C57 | SIN.LV.SF.GFP | SPLEEN           | 18 | 21043884 | - | NM_029491    | D030074E01Rik | - |
| DMM12 | Cdkn2a <sup>-/-</sup> _C57 | SIN.LV.SF.GFP | LIVER            | 18 | 22451172 | + | NM_027616    | 4921528I01Rik | - |
| DMM5  | Cdkn2a <sup>-/-</sup> _C57 | SIN.LV.SF.GFP | LIVER            | 18 | 25354798 | - | NM_001033532 | AW554918      | + |
| DMM7  | Cdkn2a <sup>-/-</sup> _C57 | SIN.LV.SF.GFP | LIVER            | 18 | 26822955 | + | NM_001146292 | Brunol4       | - |
| DMM5  | Cdkn2a <sup>-/-</sup> _C57 | SIN.LV.SF.GFP | LIVER            | 18 | 26979962 | - | NM_001146292 | Brunol4       | - |
| DMM14 | Cdkn2a <sup>-/-</sup> _C57 | SIN.LV.SF.GFP | LIVER            | 18 | 31484799 | - | NM_009065    | Rit2          | - |
| DMM7  | Cdkn2a <sup>-/-</sup> _C57 | SIN.LV.SF.GFP | LIVER            | 18 | 31739989 | - | NM_026165    | Slc25a46      | - |
| DMM3  | Cdkn2a <sup>-/-</sup> _C57 | SIN.LV.SF.GFP | LIVER            | 18 | 31997995 | + | NM_028866    | Wdr33         | + |
| DMM11 | Cdkn2a <sup>-/-</sup> _C57 | SIN.LV.SF.GFP | - LIVER - SPLEEN | 18 | 32023687 | + | NM_028866    | Wdr33         | + |
| DMM11 | Cdkn2a <sup>-/-</sup> _C57 | SIN.LV.SF.GFP | LIVER            | 18 | 32023841 | - | NM_028866    | Wdr33         | + |
| DMM11 | Cdkn2a <sup>-/-</sup> _C57 | SIN.LV.SF.GFP | LIVER            | 18 | 32023849 | - | NM_028866    | Wdr33         | + |
| DMM11 | Cdkn2a <sup>-/-</sup> _C57 | SIN.LV.SF.GFP | LIVER            | 18 | 32023861 | - | NM_028866    | Wdr33         | + |
| DMM4  | Cdkn2a <sup>-/-</sup> _C57 | SIN.LV.SF.GFP | LIVER            | 18 | 32023888 | - | NM_028866    | Wdr33         | + |
| DMM11 | Cdkn2a <sup>-/-</sup> _C57 | SIN.LV.SF.GFP | LIVER            | 18 | 32023903 | - | NM_028866    | Wdr33         | + |
| DMM4  | Cdkn2a <sup>-/-</sup> _C57 | SIN.LV.SF.GFP | LIVER            | 18 | 32024012 | - | NM_028866    | Wdr33         | + |
| DMM11 | Cdkn2a <sup>-/-</sup> _C57 | SIN.LV.SF.GFP | LIVER            | 18 | 32024020 | - | NM_028866    | Wdr33         | + |
| DMM1  | Cdkn2a <sup>-/-</sup> _C57 | SIN.LV.SF.GFP | LIVER            | 18 | 38585711 | - | NM_022996    | Ndfip1        | + |
| DMM5  | Cdkn2a <sup>-/-</sup> _C57 | SIN.LV.SF.GFP | LIVER            | 18 | 39582803 | - | NM_008173    | Nr3c1         | - |

|       |                            |               |                |    |          |   |              |               |   |
|-------|----------------------------|---------------|----------------|----|----------|---|--------------|---------------|---|
| DMM1  | Cdkn2a <sup>-/-</sup> _C57 | SIN.LV.SF.GFP | LIVER          | 18 | 40374174 | - | NM_023311    | Yipf5         | - |
| DMM1  | Cdkn2a <sup>-/-</sup> _C57 | SIN.LV.SF.GFP | LIVER          | 18 | 42469741 | - | NM_172626    | Rbm27         | + |
| DMM1  | Cdkn2a <sup>-/-</sup> _C57 | SIN.LV.SF.GFP | LIVER          | 18 | 42723664 | - | NM_001039474 | Tcerg1        | + |
| DMM3  | Cdkn2a <sup>-/-</sup> _C57 | SIN.LV.SF.GFP | LIVER          | 18 | 44995988 | + | NM_001085373 | Mcc           | - |
| DMM14 | Cdkn2a <sup>-/-</sup> _C57 | SIN.LV.SF.GFP | LIVER          | 18 | 46764805 | + | NM_010120    | Eif1a         | + |
| DMM14 | Cdkn2a <sup>-/-</sup> _C57 | SIN.LV.SF.GFP | LIVER          | 18 | 46941503 | - | NM_009681    | Ap3s1         | + |
| DMM3  | Cdkn2a <sup>-/-</sup> _C57 | SIN.LV.SF.GFP | LIVER          | 18 | 50023840 | + | NM_001081371 | Dmx11         | + |
| DMM5  | Cdkn2a <sup>-/-</sup> _C57 | SIN.LV.SF.GFP | LIVER          | 18 | 52654394 | + | NM_026040    | Srfbp1        | + |
| DMM1  | Cdkn2a <sup>-/-</sup> _C57 | SIN.LV.SF.GFP | SPLEEN         | 18 | 53220078 | + | NM_026386    | Snx2          | + |
| DMM14 | Cdkn2a <sup>-/-</sup> _C57 | SIN.LV.SF.GFP | LIVER          | 18 | 53458632 | - | NM_029394    | Snx24         | + |
| DMM5  | Cdkn2a <sup>-/-</sup> _C57 | SIN.LV.SF.GFP | LIVER          | 18 | 53855386 | + | NM_178686    | Cep120        | - |
| DMM1  | Cdkn2a <sup>-/-</sup> _C57 | SIN.LV.SF.GFP | SPLEEN         | 18 | 55097407 | + | NM_175751    | Zfp608        | - |
| DMM14 | Cdkn2a <sup>-/-</sup> _C57 | SIN.LV.SF.GFP | LIVER          | 18 | 56208691 | - | NM_026240    | Gramd3        | + |
| DMM5  | Cdkn2a <sup>-/-</sup> _C57 | SIN.LV.SF.GFP | LIVER          | 18 | 56659478 | - | NM_026240    | Gramd3        | + |
| DMM5  | Cdkn2a <sup>-/-</sup> _C57 | SIN.LV.SF.GFP | LIVER          | 18 | 58288022 | - | NM_010181    | Fbn2          | - |
| DMM1  | Cdkn2a <sup>-/-</sup> _C57 | SIN.LV.SF.GFP | LIVER          | 18 | 58822335 | - | NM_025478    | Isoc1         | + |
| DMM1  | Cdkn2a <sup>-/-</sup> _C57 | SIN.LV.SF.GFP | LIVER          | 18 | 58839075 | + | NM_025478    | Isoc1         | + |
| DMM7  | Cdkn2a <sup>-/-</sup> _C57 | SIN.LV.SF.GFP | LIVER          | 18 | 59467611 | - | NM_001081328 | Chsy3         | + |
| DMM14 | Cdkn2a <sup>-/-</sup> _C57 | SIN.LV.SF.GFP | SPLEEN         | 18 | 63146254 | + | NM_028017    | Napg          | + |
| DMM1  | Cdkn2a <sup>-/-</sup> _C57 | SIN.LV.SF.GFP | SPLEEN         | 18 | 64664223 | - | NM_001142950 | Nars          | - |
| DMM1  | Cdkn2a <sup>-/-</sup> _C57 | SIN.LV.SF.GFP | LIVER          | 18 | 65022178 | - | NM_001114386 | Nedd4l        | + |
| DMM7  | Cdkn2a <sup>-/-</sup> _C57 | SIN.LV.SF.GFP | SPLEEN         | 18 | 66652853 | + | NM_021451    | Pmaip1        | + |
| DMM12 | Cdkn2a <sup>-/-</sup> _C57 | SIN.LV.SF.GFP | LIVER - SPLEEN | 18 | 67840985 | + | NM_001127177 | Ptpn2         | - |
| DMM14 | Cdkn2a <sup>-/-</sup> _C57 | SIN.LV.SF.GFP | LIVER          | 18 | 67945652 | - | NM_028112    | Seh1l         | + |
| DMM3  | Cdkn2a <sup>-/-</sup> _C57 | SIN.LV.SF.GFP | LIVER          | 18 | 68295653 | + | NM_172631    | D18Erd653e    | + |
| DMM7  | Cdkn2a <sup>-/-</sup> _C57 | SIN.LV.SF.GFP | SPLEEN         | 18 | 68423574 | - | NM_153794    | 4933403F05Rik | - |
| DMM3  | Cdkn2a <sup>-/-</sup> _C57 | SIN.LV.SF.GFP | LIVER          | 18 | 69589963 | - | NM_001083967 | Tcf4          | + |
| DMM14 | Cdkn2a <sup>-/-</sup> _C57 | SIN.LV.SF.GFP | LIVER          | 18 | 69756451 | - | NM_001083967 | Tcf4          | + |
| DMM5  | Cdkn2a <sup>-/-</sup> _C57 | SIN.LV.SF.GFP | LIVER          | 18 | 70342657 | + | NM_001082553 | Rab27b        | - |
| DMM1  | Cdkn2a <sup>-/-</sup> _C57 | SIN.LV.SF.GFP | SPLEEN         | 18 | 70640090 | + | NM_029019    | Stard6        | + |
| DMM3  | Cdkn2a <sup>-/-</sup> _C57 | SIN.LV.SF.GFP | LIVER          | 18 | 70775791 | - | NM_010773    | Mbd2          | + |

|       |                            |               |        |    |          |   |              |               |   |
|-------|----------------------------|---------------|--------|----|----------|---|--------------|---------------|---|
| DMM1  | Cdkn2a <sup>-/-</sup> _C57 | SIN.LV.SF.GFP | LIVER  | 18 | 73897865 | - | NM_053255    | Elac1         | - |
| DMM1  | Cdkn2a <sup>-/-</sup> _C57 | SIN.LV.SF.GFP | LIVER  | 18 | 76062774 | + | NM_145356    | Zbtb7c        | + |
| DMM3  | Cdkn2a <sup>-/-</sup> _C57 | SIN.LV.SF.GFP | LIVER  | 18 | 76471984 | - | NM_010754    | Smad2         | + |
| DMM5  | Cdkn2a <sup>-/-</sup> _C57 | SIN.LV.SF.GFP | LIVER  | 18 | 79007584 | - | NM_053099    | Setbp1        | - |
| DMM1  | Cdkn2a <sup>-/-</sup> _C57 | SIN.LV.SF.GFP | LIVER  | 18 | 80485675 | - | NM_025861    | Pqlc1         | + |
| DMM9  | Cdkn2a <sup>-/-</sup> _C57 | SIN.LV.SF.GFP | LIVER  | 18 | 83086393 | + | NM_183033    | Zfp516        | + |
| DMM5  | Cdkn2a <sup>-/-</sup> _C57 | SIN.LV.SF.GFP | LIVER  | 18 | 84220161 | + | NM_001081300 | Tshz1         | - |
| DMM1  | Cdkn2a <sup>-/-</sup> _C57 | SIN.LV.SF.GFP | LIVER  | 18 | 85027314 | + | NM_025797    | Cyb5          | + |
| DMM3  | Cdkn2a <sup>-/-</sup> _C57 | SIN.LV.SF.GFP | SPLEEN | 18 | 85276604 | - | NM_015798    | Fbxo15        | + |
| DMM5  | Cdkn2a <sup>-/-</sup> _C57 | SIN.LV.SF.GFP | SPLEEN | 18 | 89222733 | + | NM_175542    | Rtnn          | + |
| DMM3  | Cdkn2a <sup>-/-</sup> _C57 | SIN.LV.SF.GFP | LIVER  | 18 | 89272486 | - | NM_175542    | Rtnn          | + |
| DMM1  | Cdkn2a <sup>-/-</sup> _C57 | SIN.LV.SF.GFP | LIVER  | 18 | 89275731 | - | NM_175542    | Rtnn          | + |
| DMM9  | Cdkn2a <sup>-/-</sup> _C57 | SIN.LV.SF.GFP | SPLEEN | 18 | 89441224 | + | NM_001039149 | Cd226         | + |
| DMM5  | Cdkn2a <sup>-/-</sup> _C57 | SIN.LV.SF.GFP | LIVER  | 18 | 90702982 | - | NM_198295    | Tmx3          | + |
| DMM7  | Cdkn2a <sup>-/-</sup> _C57 | SIN.LV.SF.GFP | LIVER  | 18 | 90712062 | - | NM_198295    | Tmx3          | + |
| DMM5  | Cdkn2a <sup>-/-</sup> _C57 | SIN.LV.SF.GFP | LIVER  | 19 | 7406814  | + | NM_001080388 | Mark2         | - |
| DMM3  | Cdkn2a <sup>-/-</sup> _C57 | SIN.LV.SF.GFP | LIVER  | 19 | 8276270  | - | NM_172776    | D630002G06Rik | - |
| DMM1  | Cdkn2a <sup>-/-</sup> _C57 | SIN.LV.SF.GFP | LIVER  | 19 | 14722721 | - | NM_011600    | Tle4          | - |
| DMM9  | Cdkn2a <sup>-/-</sup> _C57 | SIN.LV.SF.GFP | SPLEEN | 19 | 16773453 | - | NM_173028    | Vps13a        | - |
| DMM14 | Cdkn2a <sup>-/-</sup> _C57 | SIN.LV.SF.GFP | LIVER  | 19 | 16823677 | + | NM_173028    | Vps13a        | - |
| DMM1  | Cdkn2a <sup>-/-</sup> _C57 | SIN.LV.SF.GFP | LIVER  | 19 | 18724827 | - | NM_145497    | BC016495      | + |
| DMM1  | Cdkn2a <sup>-/-</sup> _C57 | SIN.LV.SF.GFP | LIVER  | 19 | 21701224 | + | NM_025423    | 1110059E24Rik | - |
| DMM3  | Cdkn2a <sup>-/-</sup> _C57 | SIN.LV.SF.GFP | LIVER  | 19 | 21738043 | - | NM_146096    | Fam108b       | + |
| DMM1  | Cdkn2a <sup>-/-</sup> _C57 | SIN.LV.SF.GFP | LIVER  | 19 | 22049607 | - | NM_001033759 | Tmem2         | + |
| DMM14 | Cdkn2a <sup>-/-</sup> _C57 | SIN.LV.SF.GFP | SPLEEN | 19 | 23598889 | - | NM_026188    | 1700028P14Rik | - |
| DMM5  | Cdkn2a <sup>-/-</sup> _C57 | SIN.LV.SF.GFP | LIVER  | 19 | 24494986 | - | NM_008846    | Pip5k1b       | - |
| DMM9  | Cdkn2a <sup>-/-</sup> _C57 | SIN.LV.SF.GFP | LIVER  | 19 | 26742466 | + | NM_011416    | Smarca2       | + |
| DMM9  | Cdkn2a <sup>-/-</sup> _C57 | SIN.LV.SF.GFP | LIVER  | 19 | 26742509 | + | NM_011416    | Smarca2       | + |
| DMM9  | Cdkn2a <sup>-/-</sup> _C57 | SIN.LV.SF.GFP | LIVER  | 19 | 26742552 | - | NM_011416    | Smarca2       | + |
| DMM14 | Cdkn2a <sup>-/-</sup> _C57 | SIN.LV.SF.GFP | LIVER  | 19 | 29090830 | + | NM_025950    | Cdc3711       | + |
| DMM14 | Cdkn2a <sup>-/-</sup> _C57 | SIN.LV.SF.GFP | LIVER  | 19 | 32866271 | - | NM_008960    | Pten          | + |

|       |                            |               |        |    |          |   |              |               |   |
|-------|----------------------------|---------------|--------|----|----------|---|--------------|---------------|---|
| DMM14 | Cdkn2a <sup>-/-</sup> _C57 | SIN.LV.SF.GFP | LIVER  | 19 | 32872570 | + | NM_008960    | Pten          | + |
| DMM14 | Cdkn2a <sup>-/-</sup> _C57 | SIN.LV.SF.GFP | LIVER  | 19 | 32872635 | + | NM_008960    | Pten          | + |
| DMM5  | Cdkn2a <sup>-/-</sup> _C57 | SIN.LV.SF.GFP | LIVER  | 19 | 32874052 | + | NM_008960    | Pten          | + |
| DMM14 | Cdkn2a <sup>-/-</sup> _C57 | SIN.LV.SF.GFP | LIVER  | 19 | 32874378 | - | NM_008960    | Pten          | + |
| DMM8  | Cdkn2a <sup>-/-</sup> _C57 | SIN.LV.SF.GFP | LIVER  | 19 | 32890027 | + | NM_008960    | Pten          | + |
| DMM14 | Cdkn2a <sup>-/-</sup> _C57 | SIN.LV.SF.GFP | LIVER  | 19 | 33165240 | + | NM_001146342 | Rnls          | - |
| DMM1  | Cdkn2a <sup>-/-</sup> _C57 | SIN.LV.SF.GFP | LIVER  | 19 | 33264090 | + | NM_001146342 | Rnls          | - |
| DMM1  | Cdkn2a <sup>-/-</sup> _C57 | SIN.LV.SF.GFP | SPLEEN | 19 | 33575354 | + | NM_001013770 | Ai747699      | - |
| DMM14 | Cdkn2a <sup>-/-</sup> _C57 | SIN.LV.SF.GFP | LIVER  | 19 | 34788420 | + | NM_172838    | Slc16a12      | - |
| DMM14 | Cdkn2a <sup>-/-</sup> _C57 | SIN.LV.SF.GFP | LIVER  | 19 | 37026845 | - | NM_001080706 | Btaf1         | + |
| DMM14 | Cdkn2a <sup>-/-</sup> _C57 | SIN.LV.SF.GFP | LIVER  | 19 | 37613441 | + | NM_175353    | Exoc6         | + |
| DMM14 | Cdkn2a <sup>-/-</sup> _C57 | SIN.LV.SF.GFP | LIVER  | 19 | 37742278 | + | NM_175353    | Exoc6         | + |
| DMM1  | Cdkn2a <sup>-/-</sup> _C57 | SIN.LV.SF.GFP | LIVER  | 19 | 39006669 | - | NM_008234    | Hells         | + |
| DMM14 | Cdkn2a <sup>-/-</sup> _C57 | SIN.LV.SF.GFP | LIVER  | 19 | 41869248 | - | NM_027667    | Arhgap19      | - |
| DMM1  | Cdkn2a <sup>-/-</sup> _C57 | SIN.LV.SF.GFP | LIVER  | 19 | 42628254 | - | NM_177464    | D19Erd386e    | + |
| DMM1  | Cdkn2a <sup>-/-</sup> _C57 | SIN.LV.SF.GFP | LIVER  | 19 | 44122028 | - | NM_145502    | Erlin1        | - |
| DMM14 | Cdkn2a <sup>-/-</sup> _C57 | SIN.LV.SF.GFP | LIVER  | 19 | 44471133 | + | NM_009127    | Scd1          | - |
| DMM3  | Cdkn2a <sup>-/-</sup> _C57 | SIN.LV.SF.GFP | LIVER  | 19 | 45850377 | + | NM_023799    | Mgea5         | - |
| DMM1  | Cdkn2a <sup>-/-</sup> _C57 | SIN.LV.SF.GFP | LIVER  | 19 | 45987375 | - | NM_198296    | 9130011E15Rik | - |
| DMM18 | Cdkn2a <sup>-/-</sup> _C57 | SIN.LV.SF.GFP | SPLEEN | 19 | 56481096 | - | NM_007611    | Casp7         | + |
| DMM1  | Cdkn2a <sup>-/-</sup> _C57 | SIN.LV.SF.GFP | LIVER  | 19 | 60276390 | - | NM_029648    | D19Erd737e    | - |
| DMM5  | Cdkn2a <sup>-/-</sup> _C57 | SIN.LV.SF.GFP | LIVER  | 19 | 60838368 | + | NM_010123    | Eif3a         | - |
| DMM5  | Cdkn2a <sup>-/-</sup> _C57 | SIN.LV.SF.GFP | LIVER  | X  | 5580016  | + | NM_021431    | Nudt11        | + |
| DMM5  | Cdkn2a <sup>-/-</sup> _C57 | SIN.LV.SF.GFP | LIVER  | X  | 7735360  | - | NM_172478    | Tbc1d25       | - |
| DMM1  | Cdkn2a <sup>-/-</sup> _C57 | SIN.LV.SF.GFP | SPLEEN | X  | 8840563  | + | NM_173414    | Lanc13        | + |
| DMM1  | Cdkn2a <sup>-/-</sup> _C57 | SIN.LV.SF.GFP | LIVER  | X  | 9025577  | - | NM_007807    | Cybb          | - |
| DMM1  | Cdkn2a <sup>-/-</sup> _C57 | SIN.LV.SF.GFP | LIVER  | X  | 9044948  | - | NM_007807    | Cybb          | - |
| DMM1  | Cdkn2a <sup>-/-</sup> _C57 | SIN.LV.SF.GFP | LIVER  | X  | 10281023 | - | NM_026524    | Mid1ip1       | + |
| DMM5  | Cdkn2a <sup>-/-</sup> _C57 | SIN.LV.SF.GFP | LIVER  | X  | 17089234 | + | NM_028058    | Fundc1        | - |
| DMM5  | Cdkn2a <sup>-/-</sup> _C57 | SIN.LV.SF.GFP | LIVER  | X  | 17728387 | - | NM_028568    | Dusp21        | + |
| DMM5  | Cdkn2a <sup>-/-</sup> _C57 | SIN.LV.SF.GFP | LIVER  | X  | 18752830 | - | NM_175228    | 4930578C19Rik | - |

|       |                            |               |        |   |          |   |              |                    |   |
|-------|----------------------------|---------------|--------|---|----------|---|--------------|--------------------|---|
| DMM2  | Cdkn2a <sup>-/-</sup> _C57 | SIN.LV.SF.GFP | LIVER  | X | 21311003 | - | NM_020049    | Slc6a14            | + |
| DMM1  | Cdkn2a <sup>-/-</sup> _C57 | SIN.LV.SF.GFP | LIVER  | X | 34406273 | + | NM_029951    | C330007P06Rik      | - |
| DMM14 | Cdkn2a <sup>-/-</sup> _C57 | SIN.LV.SF.GFP | SPLEEN | X | 35761550 | - | NM_001017959 | Lamp2              | - |
| DMM3  | Cdkn2a <sup>-/-</sup> _C57 | SIN.LV.SF.GFP | LIVER  | X | 35966911 | - | NM_026902    | Mcts1              | + |
| DMM5  | Cdkn2a <sup>-/-</sup> _C57 | SIN.LV.SF.GFP | LIVER  | X | 38641686 | + | NM_016886    | Gria3              | + |
| DMM5  | Cdkn2a <sup>-/-</sup> _C57 | SIN.LV.SF.GFP | LIVER  | X | 38901620 | - | NM_016886    | Gria3              | + |
| DMM3  | Cdkn2a <sup>-/-</sup> _C57 | SIN.LV.SF.GFP | LIVER  | X | 39226473 | - | NM_001033422 | Thoc2              | - |
| DMM7  | Cdkn2a <sup>-/-</sup> _C57 | SIN.LV.SF.GFP | LIVER  | X | 44726220 | + | NM_053123    | Smarca1            | - |
| DMM18 | Cdkn2a <sup>-/-</sup> _C57 | SIN.LV.SF.GFP | SPLEEN | X | 44771250 | + | NM_053123    | Smarca1            | - |
| DMM1  | Cdkn2a <sup>-/-</sup> _C57 | SIN.LV.SF.GFP | LIVER  | X | 46498317 | - | NM_145951    | Enox2              | - |
| DMM9  | Cdkn2a <sup>-/-</sup> _C57 | SIN.LV.SF.GFP | LIVER  | X | 48332786 | - | NM_172413    | Rap2c              | - |
| DMM2  | Cdkn2a <sup>-/-</sup> _C57 | SIN.LV.SF.GFP | LIVER  | X | 50625894 | + | NM_028671    | Fam122c            | + |
| DMM5  | Cdkn2a <sup>-/-</sup> _C57 | SIN.LV.SF.GFP | LIVER  | X | 50699269 | + | NM_027409    | Mospd1             | - |
| DMM18 | Cdkn2a <sup>-/-</sup> _C57 | SIN.LV.SF.GFP | LIVER  | X | 53866921 | - | NM_172780    | Slc9a6             | + |
| DMM14 | Cdkn2a <sup>-/-</sup> _C57 | SIN.LV.SF.GFP | LIVER  | X | 54314379 | + | NM_028242    | Htatsf1            | + |
| DMM1  | Cdkn2a <sup>-/-</sup> _C57 | SIN.LV.SF.GFP | SPLEEN | X | 56076157 | + | NM_023774    | 4930550L24Rik      | + |
| DMM14 | Cdkn2a <sup>-/-</sup> _C57 | SIN.LV.SF.GFP | LIVER  | X | 57540291 | - | NM_001001798 | Atp11c             | - |
| DMM1  | Cdkn2a <sup>-/-</sup> _C57 | SIN.LV.SF.GFP | LIVER  | X | 57606452 | + | NM_001001798 | Atp11c             | - |
| DMM3  | Cdkn2a <sup>-/-</sup> _C57 | SIN.LV.SF.GFP | LIVER  | X | 57648418 | - | NM_001001798 | Atp11c             | - |
| DMM1  | Cdkn2a <sup>-/-</sup> _C57 | SIN.LV.SF.GFP | LIVER  | X | 67607703 | + | NM_001038990 | Ids                | - |
| DMM3  | Cdkn2a <sup>-/-</sup> _C57 | SIN.LV.SF.GFP | LIVER  | X | 71327802 | - | NM_010788    | Mecp2              | - |
| DMM5  | Cdkn2a <sup>-/-</sup> _C57 | SIN.LV.SF.GFP | LIVER  | X | 72362318 | + | NM_008621    | Mpp1               | - |
| DMM1  | Cdkn2a <sup>-/-</sup> _C57 | SIN.LV.SF.GFP | LIVER  | X | 72781957 | + | NM_011692    | Vbp1               | + |
| DMM11 | Cdkn2a <sup>-/-</sup> _C57 | SIN.LV.SF.GFP | LIVER  | X | 72901325 | + | NM_175122    | Rab39b             | - |
| DMM5  | Cdkn2a <sup>-/-</sup> _C57 | SIN.LV.SF.GFP | LIVER  | X | 72913376 | - | NM_175122    | Rab39b             | - |
| DMM3  | Cdkn2a <sup>-/-</sup> _C57 | SIN.LV.SF.GFP | LIVER  | X | 74764893 | + | NM_020601    | Tbl1x              | + |
| DMM4  | Cdkn2a <sup>-/-</sup> _C57 | SIN.LV.SF.GFP | SPLEEN | X | 75804019 | - | NM_001126321 | OTTMUSG00000017864 | - |
| DMM3  | Cdkn2a <sup>-/-</sup> _C57 | SIN.LV.SF.GFP | LIVER  | X | 81140631 | + | NM_007868    | Dmd                | + |
| DMM1  | Cdkn2a <sup>-/-</sup> _C57 | SIN.LV.SF.GFP | LIVER  | X | 82825849 | + | NM_025729    | Map3k7ip3          | + |
| DMM1  | Cdkn2a <sup>-/-</sup> _C57 | SIN.LV.SF.GFP | LIVER  | X | 82841993 | + | NM_025729    | Map3k7ip3          | + |
| DMM1  | Cdkn2a <sup>-/-</sup> _C57 | SIN.LV.SF.GFP | SPLEEN | X | 82984388 | - | NM_008194    | Gyk                | - |

|       |                            |               |              |   |           |   |              |               |   |
|-------|----------------------------|---------------|--------------|---|-----------|---|--------------|---------------|---|
| DMM8  | Cdkn2a <sup>-/-</sup> _C57 | SIN.LV.SF.GFP | SPLEEN       | X | 84783945  | + | NM_001160403 | Il1rap1l      | - |
| DMM9  | Cdkn2a <sup>-/-</sup> _C57 | SIN.LV.SF.GFP | LIVER        | X | 91408363  | - | NM_012010    | Eif2s3x       | - |
| DMM9  | Cdkn2a <sup>-/-</sup> _C57 | SIN.LV.SF.GFP | LIVER        | X | 92338722  | - | NM_001033329 | Arhgef9       | - |
| DMM9  | Cdkn2a <sup>-/-</sup> _C57 | SIN.LV.SF.GFP | LIVER        | X | 92719054  | - | NM_080858    | Asb12         | - |
| DMM5  | Cdkn2a <sup>-/-</sup> _C57 | SIN.LV.SF.GFP | LIVER        | X | 92830086  | + | NM_001003916 | Zc4h2         | - |
| DMM1  | Cdkn2a <sup>-/-</sup> _C57 | SIN.LV.SF.GFP | LIVER        | X | 95752155  | - | NM_052976    | Ophn1         | - |
| DMM1  | Cdkn2a <sup>-/-</sup> _C57 | SIN.LV.SF.GFP | LIVER        | X | 96066972  | + | NM_052976    | Ophn1         | - |
| DMM14 | Cdkn2a <sup>-/-</sup> _C57 | SIN.LV.SF.GFP | SPLEEN       | X | 96577084  | + | NM_001083110 | Pja1          | - |
| DMM1  | Cdkn2a <sup>-/-</sup> _C57 | SIN.LV.SF.GFP | LIVER        | X | 98339949  | - | NM_001110311 | Snx12         | - |
| DMM8  | Cdkn2a <sup>-/-</sup> _C57 | SIN.LV.SF.GFP | VER - SPLEEN | X | 99310439  | + | NM_027181    | Pin4          | + |
| DMM14 | Cdkn2a <sup>-/-</sup> _C57 | SIN.LV.SF.GFP | LIVER        | X | 104283187 | + | NM_172435    | P2ry10        | + |
| DMM14 | Cdkn2a <sup>-/-</sup> _C57 | SIN.LV.SF.GFP | LIVER        | X | 104332231 | - | NM_001122596 | A630033H20Rik | + |
| DMM14 | Cdkn2a <sup>-/-</sup> _C57 | SIN.LV.SF.GFP | LIVER        | X | 106050631 | - | NM_001081477 | Brwd3         | - |
| DMM18 | Cdkn2a <sup>-/-</sup> _C57 | SIN.LV.SF.GFP | SPLEEN       | X | 112722409 | + | NM_001081661 | 4930524E20Rik | + |
| DMM8  | Cdkn2a <sup>-/-</sup> _C57 | SIN.LV.SF.GFP | SPLEEN       | X | 113660520 | - | NM_001033471 | Cpxcr1        | + |
| DMM5  | Cdkn2a <sup>-/-</sup> _C57 | SIN.LV.SF.GFP | LIVER        | X | 116505088 | - | NM_053114    | Pabpc5        | + |
| DMM13 | Cdkn2a <sup>-/-</sup> _C57 | SIN.LV.SF.GFP | SPLEEN       | X | 126296566 | - | NM_017398    | Diap2         | + |
| DMM3  | Cdkn2a <sup>-/-</sup> _C57 | SIN.LV.SF.GFP | LIVER        | X | 126427951 | + | NM_017398    | Diap2         | + |
| DMM18 | Cdkn2a <sup>-/-</sup> _C57 | SIN.LV.SF.GFP | SPLEEN       | X | 126428638 | - | NM_017398    | Diap2         | + |
| DMM3  | Cdkn2a <sup>-/-</sup> _C57 | SIN.LV.SF.GFP | LIVER        | X | 126987928 | - | NM_172493    | Diap2         | + |
| DMM14 | Cdkn2a <sup>-/-</sup> _C57 | SIN.LV.SF.GFP | LIVER        | X | 130172375 | - | NM_001105245 | Pcdh19        | - |
| DMM8  | Cdkn2a <sup>-/-</sup> _C57 | SIN.LV.SF.GFP | VER - SPLEEN | X | 135211456 | + | NM_030688    | Il1rap12      | + |
| DMM8  | Cdkn2a <sup>-/-</sup> _C57 | SIN.LV.SF.GFP | LIVER        | X | 135211480 | + | NM_030688    | Il1rap12      | + |
| DMM8  | Cdkn2a <sup>-/-</sup> _C57 | SIN.LV.SF.GFP | LIVER        | X | 135211535 | + | NM_030688    | Il1rap12      | + |
| DMM8  | Cdkn2a <sup>-/-</sup> _C57 | SIN.LV.SF.GFP | VER - SPLEEN | X | 135211574 | - | NM_030688    | Il1rap12      | + |
| DMM14 | Cdkn2a <sup>-/-</sup> _C57 | SIN.LV.SF.GFP | SPLEEN       | X | 136497478 | + | NM_153586    | Rbm41         | - |
| DMM7  | Cdkn2a <sup>-/-</sup> _C57 | SIN.LV.SF.GFP | SPLEEN       | X | 137506760 | - | NM_174875    | Atg4a         | + |
| DMM18 | Cdkn2a <sup>-/-</sup> _C57 | SIN.LV.SF.GFP | SPLEEN       | X | 138792947 | + | NM_001033600 | Acs14         | - |
| DMM1  | Cdkn2a <sup>-/-</sup> _C57 | SIN.LV.SF.GFP | LIVER        | X | 138949896 | - | NM_001033600 | Acs14         | - |
| DMM12 | Cdkn2a <sup>-/-</sup> _C57 | SIN.LV.SF.GFP | VER - SPLEEN | X | 140801947 | - | NM_009428    | Trpc5         | - |
| DMM14 | Cdkn2a <sup>-/-</sup> _C57 | SIN.LV.SF.GFP | SPLEEN       | X | 150121294 | + | NM_175429    | Kctd12b       | - |



|       |                            |               |              |   |           |   |              |               |   |
|-------|----------------------------|---------------|--------------|---|-----------|---|--------------|---------------|---|
| DMM1  | Cdkn2a <sup>-/-</sup> _C57 | SIN.LV.SF.GFP | LIVER        | X | 150167752 | - | NM_175429    | Kctd12b       | - |
| DMM3  | Cdkn2a <sup>-/-</sup> _C57 | SIN.LV.SF.GFP | LIVER        | X | 153841611 | - | NM_011077    | Phex          | - |
| DMM1  | Cdkn2a <sup>-/-</sup> _C57 | SIN.LV.SF.GFP | LIVER        | X | 154744643 | + | NM_177751    | Cnksr2        | - |
| DMM5  | Cdkn2a <sup>-/-</sup> _C57 | SIN.LV.SF.GFP | LIVER        | X | 160352639 | - | NM_026887    | Ap1s2         | + |
| DMM1  | Cdkn2a <sup>-/-</sup> _C57 | SIN.LV.SF.GFP | LIVER        | X | 162907580 | + | NM_019773    | Rab9          | - |
| DMM1  | Cdkn2a <sup>-/-</sup> _C57 | SIN.LV.SF.GFP | LIVER        | X | 162930053 | - | NM_001007577 | Tceanc        | - |
| DMM9  | Cdkn2a <sup>-/-</sup> _C57 | SIN.LV.SF.GFP | LIVER        | X | 162934844 | + | NM_001007577 | Tceanc        | - |
| DMM9  | Cdkn2a <sup>-/-</sup> _C57 | SIN.LV.SF.GFP | LIVER        | X | 162934897 | - | NM_001007577 | Tceanc        | - |
| DMM9  | Cdkn2a <sup>-/-</sup> _C57 | SIN.LV.SF.GFP | LIVER        | X | 162934941 | - | NM_001007577 | Tceanc        | - |
| DMM5  | Cdkn2a <sup>-/-</sup> _C57 | SIN.LV.SF.GFP | LIVER        | X | 163809615 | + | NM_026662    | Prps2         | - |
| DMM1  | Cdkn2a <sup>-/-</sup> _C57 | SIN.LV.SF.GFP | LIVER        | X | 164656784 | + | NM_001033330 | Frmpr4        | - |
| DMM14 | Cdkn2a <sup>-/-</sup> _C57 | SIN.LV.SF.GFP | LIVER        | Y | 1771158   | + | NM_001113395 | Gm16501       | + |
| DMM3  | Cdkn2a <sup>-/-</sup> _C57 | SIN.LV.SF.GFP | LIVER        | Y | 2782093   | - | NM_011253    | Rbmy1a1       | + |
| DMM32 | Cdkn2a <sup>-/-</sup> _C57 | SIN.LV.SF.PRE | LIVER        | 1 | 5131590   | + | NM_133826    | Atp6v1h       | + |
| DMM30 | Cdkn2a <sup>-/-</sup> _C57 | SIN.LV.SF.PRE | LIVER        | 1 | 21829856  | + | NM_001160139 | Kcnq5         | - |
| DMM22 | Cdkn2a <sup>-/-</sup> _C57 | SIN.LV.SF.PRE | LIVER        | 1 | 22330573  | + | NM_001012623 | Rims1         | - |
| DMM19 | Cdkn2a <sup>-/-</sup> _C57 | SIN.LV.SF.PRE | LIVER        | 1 | 24775042  | - | NM_026719    | Lmbrd1        | + |
| DMM34 | Cdkn2a <sup>-/-</sup> _C57 | SIN.LV.SF.PRE | LIVER        | 1 | 30898019  | - | NM_001081080 | Phf3          | - |
| DMM22 | Cdkn2a <sup>-/-</sup> _C57 | SIN.LV.SF.PRE | LIVER        | 1 | 34192716  | + | NM_133833    | Dst           | + |
| DMM22 | Cdkn2a <sup>-/-</sup> _C57 | SIN.LV.SF.PRE | VER - SPLEEN | 1 | 34192937  | - | NM_133833    | Dst           | + |
| DMM34 | Cdkn2a <sup>-/-</sup> _C57 | SIN.LV.SF.PRE | LIVER        | 1 | 45898870  | - | NM_028599    | Wdr75         | + |
| DMM32 | Cdkn2a <sup>-/-</sup> _C57 | SIN.LV.SF.PRE | LIVER        | 1 | 55070673  | - | NM_031179    | Sf3b1         | - |
| DMM22 | Cdkn2a <sup>-/-</sup> _C57 | SIN.LV.SF.PRE | LIVER        | 1 | 55636088  | + | NM_001114663 | Plcl1         | + |
| DMM22 | Cdkn2a <sup>-/-</sup> _C57 | SIN.LV.SF.PRE | VER - SPLEEN | 1 | 63197125  | + | NM_001160038 | Ndufs1        | - |
| DMM34 | Cdkn2a <sup>-/-</sup> _C57 | SIN.LV.SF.PRE | LIVER        | 1 | 64330756  | - | NM_033563    | Klf7          | - |
| DMM31 | Cdkn2a <sup>-/-</sup> _C57 | SIN.LV.SF.PRE | LIVER        | 1 | 65290544  | - | NM_011086    | Pikfyve       | + |
| DMM34 | Cdkn2a <sup>-/-</sup> _C57 | SIN.LV.SF.PRE | LIVER        | 1 | 66851711  | - | NM_001122738 | 1110028C15Rik | - |
| DMM30 | Cdkn2a <sup>-/-</sup> _C57 | SIN.LV.SF.PRE | LIVER        | 1 | 67024419  | - | NM_021295    | Lancl1        | - |
| DMM32 | Cdkn2a <sup>-/-</sup> _C57 | SIN.LV.SF.PRE | LIVER        | 1 | 80267420  | + | NM_016716    | Cul3          | - |
| DMM22 | Cdkn2a <sup>-/-</sup> _C57 | SIN.LV.SF.PRE | LIVER        | 1 | 80596287  | + | NM_175291    | Dock10        | - |
| DMM22 | Cdkn2a <sup>-/-</sup> _C57 | SIN.LV.SF.PRE | SPLEEN       | 1 | 82883375  | - | NM_010472    | Agfg1         | + |

|       |                            |               |                |   |           |   |              |               |   |
|-------|----------------------------|---------------|----------------|---|-----------|---|--------------|---------------|---|
| DMM34 | Cdkn2a <sup>-/-</sup> _C57 | SIN.LV.SF.PRE | LIVER          | 1 | 90157177  | - | NM_198652    | 6430706D22Rik | - |
| DMM25 | Cdkn2a <sup>-/-</sup> _C57 | SIN.LV.SF.PRE | LIVER          | 1 | 97172682  | + | NM_026321    | Fam174a       | + |
| DMM34 | Cdkn2a <sup>-/-</sup> _C57 | SIN.LV.SF.PRE | LIVER          | 1 | 107486788 | - | NM_013784    | Pign          | - |
| DMM32 | Cdkn2a <sup>-/-</sup> _C57 | SIN.LV.SF.PRE | LIVER          | 1 | 107649252 | + | NM_029349    | 2310035C23Rik | + |
| DMM34 | Cdkn2a <sup>-/-</sup> _C57 | SIN.LV.SF.PRE | LIVER          | 1 | 109408414 | - | NM_011111    | Serpib2       | + |
| DMM25 | Cdkn2a <sup>-/-</sup> _C57 | SIN.LV.SF.PRE | LIVER          | 1 | 109414084 | + | NM_011111    | Serpib2       | + |
| DMM25 | Cdkn2a <sup>-/-</sup> _C57 | SIN.LV.SF.PRE | LIVER          | 1 | 109414163 | - | NM_011111    | Serpib2       | + |
| DMM31 | Cdkn2a <sup>-/-</sup> _C57 | SIN.LV.SF.PRE | LIVER          | 1 | 130160778 | - | NM_026390    | Ubxn4         | + |
| DMM19 | Cdkn2a <sup>-/-</sup> _C57 | SIN.LV.SF.PRE | LIVER          | 1 | 132345355 | - | NM_010016    | Cd55          | - |
| DMM34 | Cdkn2a <sup>-/-</sup> _C57 | SIN.LV.SF.PRE | LIVER          | 1 | 132395330 | - | NM_010016    | Cd55          | - |
| DMM22 | Cdkn2a <sup>-/-</sup> _C57 | SIN.LV.SF.PRE | LIVER - SPLEEN | 1 | 142060903 | - | NM_009888    | Cfh           | - |
| DMM32 | Cdkn2a <sup>-/-</sup> _C57 | SIN.LV.SF.PRE | LIVER          | 1 | 145860709 | - | NM_009061    | Rgs2          | - |
| DMM19 | Cdkn2a <sup>-/-</sup> _C57 | SIN.LV.SF.PRE | LIVER          | 1 | 146122252 | + | NM_015811    | Rgs1          | - |
| DMM34 | Cdkn2a <sup>-/-</sup> _C57 | SIN.LV.SF.PRE | LIVER          | 1 | 150627998 | + | NM_008869    | Pla2g4a       | - |
| DMM19 | Cdkn2a <sup>-/-</sup> _C57 | SIN.LV.SF.PRE | LIVER          | 1 | 150761814 | + | NM_008869    | Pla2g4a       | - |
| DMM22 | Cdkn2a <sup>-/-</sup> _C57 | SIN.LV.SF.PRE | LIVER          | 1 | 152217104 | + | NM_001077237 | BC003331      | - |
| DMM32 | Cdkn2a <sup>-/-</sup> _C57 | SIN.LV.SF.PRE | LIVER          | 1 | 152242260 | + | NM_133780    | Tpr           | + |
| DMM22 | Cdkn2a <sup>-/-</sup> _C57 | SIN.LV.SF.PRE | SPLEEN         | 1 | 152246923 | + | NM_133780    | Tpr           | + |
| DMM23 | Cdkn2a <sup>-/-</sup> _C57 | SIN.LV.SF.PRE | SPLEEN         | 1 | 152274356 | - | NM_133780    | Tpr           | + |
| DMM30 | Cdkn2a <sup>-/-</sup> _C57 | SIN.LV.SF.PRE | LIVER          | 1 | 167807117 | - | NM_011137    | Pou2f1        | - |
| DMM22 | Cdkn2a <sup>-/-</sup> _C57 | SIN.LV.SF.PRE | SPLEEN         | 1 | 182078834 | - | NM_023341    | Cabc1         | - |
| DMM34 | Cdkn2a <sup>-/-</sup> _C57 | SIN.LV.SF.PRE | LIVER          | 1 | 183067815 | - | NM_026171    | Nvl           | - |
| DMM31 | Cdkn2a <sup>-/-</sup> _C57 | SIN.LV.SF.PRE | LIVER          | 2 | 6252969   | + | NM_001080548 | Usp6nl        | + |
| DMM30 | Cdkn2a <sup>-/-</sup> _C57 | SIN.LV.SF.PRE | LIVER          | 2 | 12887514  | + | NM_008961    | Pter          | + |
| DMM30 | Cdkn2a <sup>-/-</sup> _C57 | SIN.LV.SF.PRE | LIVER          | 2 | 22834247  | + | NM_001077190 | Abi1          | - |
| DMM31 | Cdkn2a <sup>-/-</sup> _C57 | SIN.LV.SF.PRE | LIVER          | 2 | 38942951  | + | NM_178778    | A930041I02Rik | - |
| DMM31 | Cdkn2a <sup>-/-</sup> _C57 | SIN.LV.SF.PRE | LIVER          | 2 | 42046004  | + | NM_053011    | Lrp1b         | - |
| DMM22 | Cdkn2a <sup>-/-</sup> _C57 | SIN.LV.SF.PRE | SPLEEN         | 2 | 44094677  | - | NM_153820    | Arhgap15      | + |
| DMM34 | Cdkn2a <sup>-/-</sup> _C57 | SIN.LV.SF.PRE | LIVER          | 2 | 45269652  | - | NM_015753    | Zeb2          | - |
| DMM32 | Cdkn2a <sup>-/-</sup> _C57 | SIN.LV.SF.PRE | LIVER          | 2 | 46195871  | - | NM_015753    | Zeb2          | - |
| DMM30 | Cdkn2a <sup>-/-</sup> _C57 | SIN.LV.SF.PRE | LIVER          | 2 | 48187795  | + | NM_007396    | Acvr2a        | + |

|       |                            |               |              |   |           |   |              |               |   |
|-------|----------------------------|---------------|--------------|---|-----------|---|--------------|---------------|---|
| DMM26 | Cdkn2a <sup>-/-</sup> _C57 | SIN.LV.SF.PRE | LIVER        | 2 | 48625843  | - | NM_007396    | Acvr2a        | + |
| DMM30 | Cdkn2a <sup>-/-</sup> _C57 | SIN.LV.SF.PRE | LIVER        | 2 | 51951265  | + | NM_175238    | Rif1          | + |
| DMM34 | Cdkn2a <sup>-/-</sup> _C57 | SIN.LV.SF.PRE | LIVER        | 2 | 55974287  | - | NM_008426    | Kcnj3         | + |
| DMM34 | Cdkn2a <sup>-/-</sup> _C57 | SIN.LV.SF.PRE | LIVER        | 2 | 59742034  | + | NM_001001182 | Baz2b         | - |
| DMM31 | Cdkn2a <sup>-/-</sup> _C57 | SIN.LV.SF.PRE | LIVER        | 2 | 63921600  | - | NM_021716    | Figf          | - |
| DMM32 | Cdkn2a <sup>-/-</sup> _C57 | SIN.LV.SF.PRE | LIVER        | 2 | 77160429  | - | NM_175465    | Sestd1        | - |
| DMM19 | Cdkn2a <sup>-/-</sup> _C57 | SIN.LV.SF.PRE | LIVER        | 2 | 79153963  | - | NM_010576    | Itga4         | + |
| DMM19 | Cdkn2a <sup>-/-</sup> _C57 | SIN.LV.SF.PRE | LIVER        | 2 | 89862191  | + | NM_021368    | Olfrl264      | - |
| DMM32 | Cdkn2a <sup>-/-</sup> _C57 | SIN.LV.SF.PRE | LIVER        | 2 | 98507473  | - | NM_178725    | Lrrc4c        | + |
| DMM22 | Cdkn2a <sup>-/-</sup> _C57 | SIN.LV.SF.PRE | LIVER        | 2 | 104543291 | + | NM_177190    | Tcp1l1l       | - |
| DMM34 | Cdkn2a <sup>-/-</sup> _C57 | SIN.LV.SF.PRE | LIVER        | 2 | 104834366 | + | NM_177600    | Ccdc73        | + |
| DMM32 | Cdkn2a <sup>-/-</sup> _C57 | SIN.LV.SF.PRE | LIVER        | 2 | 108979288 | - | NM_029790    | Mett5d1       | - |
| DMM22 | Cdkn2a <sup>-/-</sup> _C57 | SIN.LV.SF.PRE | VER - SPLEEN | 2 | 112253782 | - | NM_024254    | 2410042D21Rik | + |
| DMM34 | Cdkn2a <sup>-/-</sup> _C57 | SIN.LV.SF.PRE | LIVER        | 2 | 114455315 | + | NM_025675    | Atpbd4        | - |
| DMM32 | Cdkn2a <sup>-/-</sup> _C57 | SIN.LV.SF.PRE | LIVER        | 2 | 116959204 | - | NM_033524    | Spred1        | + |
| DMM32 | Cdkn2a <sup>-/-</sup> _C57 | SIN.LV.SF.PRE | LIVER        | 2 | 120405286 | - | NM_009222    | Snap23        | + |
| DMM34 | Cdkn2a <sup>-/-</sup> _C57 | SIN.LV.SF.PRE | LIVER        | 2 | 130648288 | + | NM_029432    | 4930402H24Rik | - |
| DMM34 | Cdkn2a <sup>-/-</sup> _C57 | SIN.LV.SF.PRE | LIVER        | 2 | 130648370 | - | NM_029432    | 4930402H24Rik | - |
| DMM34 | Cdkn2a <sup>-/-</sup> _C57 | SIN.LV.SF.PRE | LIVER        | 2 | 131108205 | + | NM_153501    | Pank2         | + |
| DMM22 | Cdkn2a <sup>-/-</sup> _C57 | SIN.LV.SF.PRE | SPLEEN       | 2 | 132384309 | + | NM_001042671 | Prei4         | - |
| DMM22 | Cdkn2a <sup>-/-</sup> _C57 | SIN.LV.SF.PRE | LIVER        | 2 | 132862295 | - | NM_198029    | Fermt1        | - |
| DMM25 | Cdkn2a <sup>-/-</sup> _C57 | SIN.LV.SF.PRE | LIVER        | 2 | 136802964 | + | NM_001038641 | 2210009G21Rik | + |
| DMM25 | Cdkn2a <sup>-/-</sup> _C57 | SIN.LV.SF.PRE | LIVER        | 2 | 139757606 | + | NM_001159640 | Tasp1         | - |
| DMM23 | Cdkn2a <sup>-/-</sup> _C57 | SIN.LV.SF.PRE | SPLEEN       | 2 | 147673073 | - | NM_010446    | Foxa2         | - |
| DMM30 | Cdkn2a <sup>-/-</sup> _C57 | SIN.LV.SF.PRE | LIVER        | 2 | 149942607 | - | NM_023266    | Zfp120        | - |
| DMM22 | Cdkn2a <sup>-/-</sup> _C57 | SIN.LV.SF.PRE | LIVER        | 2 | 150149225 | + | NM_027017    | 3300002I08Rik | - |
| DMM34 | Cdkn2a <sup>-/-</sup> _C57 | SIN.LV.SF.PRE | LIVER        | 2 | 156558621 | + | NM_001042487 | Dlgap4        | + |
| DMM34 | Cdkn2a <sup>-/-</sup> _C57 | SIN.LV.SF.PRE | LIVER        | 2 | 157860651 | + | NM_027434    | Rprd1b        | + |
| DMM32 | Cdkn2a <sup>-/-</sup> _C57 | SIN.LV.SF.PRE | LIVER        | 2 | 165866817 | + | NM_008679    | Ncoa3         | + |
| DMM34 | Cdkn2a <sup>-/-</sup> _C57 | SIN.LV.SF.PRE | LIVER        | 3 | 4692217   | - | NM_030708    | Zfx4          | + |
| DMM22 | Cdkn2a <sup>-/-</sup> _C57 | SIN.LV.SF.PRE | SPLEEN       | 3 | 5565142   | + | NM_008994    | Pxmp3         | - |

|       |                            |               |              |   |           |   |              |         |   |
|-------|----------------------------|---------------|--------------|---|-----------|---|--------------|---------|---|
| DMM22 | Cdkn2a <sup>-/-</sup> _C57 | SIN.LV.SF.PRE | LIVER        | 3 | 10437353  | + | NM_001127191 | Snx16   | - |
| DMM22 | Cdkn2a <sup>-/-</sup> _C57 | SIN.LV.SF.PRE | LIVER        | 3 | 13586836  | + | NM_178631    | Raly1   | + |
| DMM22 | Cdkn2a <sup>-/-</sup> _C57 | SIN.LV.SF.PRE | VER - SPLEEN | 3 | 13587044  | - | NM_178631    | Raly1   | + |
| DMM22 | Cdkn2a <sup>-/-</sup> _C57 | SIN.LV.SF.PRE | VER - SPLEEN | 3 | 14548772  | - | NM_028915    | Lrrcc1  | + |
| DMM32 | Cdkn2a <sup>-/-</sup> _C57 | SIN.LV.SF.PRE | LIVER        | 3 | 15555251  | - | NM_001002898 | Sirpb1  | - |
| DMM32 | Cdkn2a <sup>-/-</sup> _C57 | SIN.LV.SF.PRE | LIVER        | 3 | 19197719  | - | NM_001122759 | Pde7a   | - |
| DMM22 | Cdkn2a <sup>-/-</sup> _C57 | SIN.LV.SF.PRE | LIVER        | 3 | 20625877  | - | NM_175086    | Agtr1b  | - |
| DMM22 | Cdkn2a <sup>-/-</sup> _C57 | SIN.LV.SF.PRE | LIVER        | 3 | 23696126  | - | NR_004439    | Rpr12   | + |
| DMM22 | Cdkn2a <sup>-/-</sup> _C57 | SIN.LV.SF.PRE | SPLEEN       | 3 | 27479519  | - | NM_173182    | Fndc3b  | - |
| DMM30 | Cdkn2a <sup>-/-</sup> _C57 | SIN.LV.SF.PRE | LIVER        | 3 | 27920392  | - | NM_008875    | Pld1    | + |
| DMM22 | Cdkn2a <sup>-/-</sup> _C57 | SIN.LV.SF.PRE | SPLEEN       | 3 | 33948070  | - | NM_001113188 | Fxr1    | + |
| DMM22 | Cdkn2a <sup>-/-</sup> _C57 | SIN.LV.SF.PRE | VER - SPLEEN | 3 | 41462389  | + | NM_001081411 | Sc1t1   | - |
| DMM34 | Cdkn2a <sup>-/-</sup> _C57 | SIN.LV.SF.PRE | LIVER        | 3 | 54125122  | - | NM_016984    | Trpc4   | + |
| DMM31 | Cdkn2a <sup>-/-</sup> _C57 | SIN.LV.SF.PRE | LIVER        | 3 | 57576022  | - | NM_001113413 | Rnf13   | + |
| DMM34 | Cdkn2a <sup>-/-</sup> _C57 | SIN.LV.SF.PRE | LIVER        | 3 | 58487569  | - | NM_009174    | Siah2   | - |
| DMM25 | Cdkn2a <sup>-/-</sup> _C57 | SIN.LV.SF.PRE | LIVER        | 3 | 60159184  | - | NM_020007    | Mbn1    | + |
| DMM34 | Cdkn2a <sup>-/-</sup> _C57 | SIN.LV.SF.PRE | LIVER        | 3 | 60736730  | + | NM_008772    | P2ry1   | + |
| DMM34 | Cdkn2a <sup>-/-</sup> _C57 | SIN.LV.SF.PRE | LIVER        | 3 | 65692101  | + | NM_019937    | Ccn1    | - |
| DMM22 | Cdkn2a <sup>-/-</sup> _C57 | SIN.LV.SF.PRE | SPLEEN       | 3 | 68907537  | + | NM_008467    | Kpna4   | - |
| DMM30 | Cdkn2a <sup>-/-</sup> _C57 | SIN.LV.SF.PRE | LIVER        | 3 | 79378215  | + | NM_026352    | Ppid    | + |
| DMM31 | Cdkn2a <sup>-/-</sup> _C57 | SIN.LV.SF.PRE | LIVER        | 3 | 81749988  | + | NM_177662    | Ctso    | + |
| DMM30 | Cdkn2a <sup>-/-</sup> _C57 | SIN.LV.SF.PRE | LIVER        | 3 | 84769978  | + | NM_080428    | Fbxw7   | + |
| DMM34 | Cdkn2a <sup>-/-</sup> _C57 | SIN.LV.SF.PRE | LIVER        | 3 | 85826374  | + | NM_001001650 | Gm1019  | - |
| DMM19 | Cdkn2a <sup>-/-</sup> _C57 | SIN.LV.SF.PRE | LIVER        | 3 | 87188930  | + | NM_001136236 | Fcrl1   | + |
| DMM34 | Cdkn2a <sup>-/-</sup> _C57 | SIN.LV.SF.PRE | LIVER        | 3 | 103721709 | + | NM_172684    | Rsb1    | + |
| DMM34 | Cdkn2a <sup>-/-</sup> _C57 | SIN.LV.SF.PRE | LIVER        | 3 | 104690854 | - | NM_153091    | St7l    | + |
| DMM32 | Cdkn2a <sup>-/-</sup> _C57 | SIN.LV.SF.PRE | LIVER        | 3 | 108135951 | + | NM_019972    | Sort1   | + |
| DMM34 | Cdkn2a <sup>-/-</sup> _C57 | SIN.LV.SF.PRE | LIVER        | 3 | 125998981 | - | NM_173451    | Arsj    | + |
| DMM22 | Cdkn2a <sup>-/-</sup> _C57 | SIN.LV.SF.PRE | LIVER        | 3 | 127296246 | - | NM_009718    | Neurog2 | + |
| DMM34 | Cdkn2a <sup>-/-</sup> _C57 | SIN.LV.SF.PRE | LIVER        | 3 | 129314842 | - | NM_130450    | Elovl6  | + |
| DMM34 | Cdkn2a <sup>-/-</sup> _C57 | SIN.LV.SF.PRE | LIVER        | 3 | 131134224 | + | NM_028943    | Sgms2   | - |

|       |                            |               |                |   |           |   |              |               |   |
|-------|----------------------------|---------------|----------------|---|-----------|---|--------------|---------------|---|
| DMM34 | Cdkn2a <sup>-/-</sup> _C57 | SIN.LV.SF.PRE | LIVER          | 3 | 138715575 | - | NM_001040690 | Rap1gds1      | - |
| DMM22 | Cdkn2a <sup>-/-</sup> _C57 | SIN.LV.SF.PRE | LIVER - SPLEEN | 3 | 138735026 | - | NM_001040690 | Rap1gds1      | - |
| DMM32 | Cdkn2a <sup>-/-</sup> _C57 | SIN.LV.SF.PRE | LIVER          | 3 | 142523286 | + | NM_178654    | Pkn2          | - |
| DMM22 | Cdkn2a <sup>-/-</sup> _C57 | SIN.LV.SF.PRE | SPLEEN         | 3 | 154747909 | + | NM_029330    | Fpgt          | - |
| DMM19 | Cdkn2a <sup>-/-</sup> _C57 | SIN.LV.SF.PRE | LIVER          | 3 | 157714652 | + | NM_024194    | Lrrc40        | + |
| DMM25 | Cdkn2a <sup>-/-</sup> _C57 | SIN.LV.SF.PRE | LIVER          | 4 | 7348272   | + | NM_145711    | Tox           | - |
| DMM32 | Cdkn2a <sup>-/-</sup> _C57 | SIN.LV.SF.PRE | LIVER          | 4 | 7387941   | + | NM_145711    | Tox           | - |
| DMM30 | Cdkn2a <sup>-/-</sup> _C57 | SIN.LV.SF.PRE | LIVER          | 4 | 11456255  | - | NM_001081183 | 1110037F02Rik | + |
| DMM34 | Cdkn2a <sup>-/-</sup> _C57 | SIN.LV.SF.PRE | LIVER          | 4 | 11945293  | + | NM_177861    | Tmem67        | - |
| DMM19 | Cdkn2a <sup>-/-</sup> _C57 | SIN.LV.SF.PRE | LIVER          | 4 | 19608112  | + | NM_177327    | Wwp1          | - |
| DMM19 | Cdkn2a <sup>-/-</sup> _C57 | SIN.LV.SF.PRE | LIVER          | 4 | 19608164  | - | NM_177327    | Wwp1          | - |
| DMM34 | Cdkn2a <sup>-/-</sup> _C57 | SIN.LV.SF.PRE | LIVER          | 4 | 19917062  | + | NM_015767    | Ttpa          | + |
| DMM34 | Cdkn2a <sup>-/-</sup> _C57 | SIN.LV.SF.PRE | LIVER          | 4 | 36669631  | - | NM_175516    | Lingo2        | - |
| DMM19 | Cdkn2a <sup>-/-</sup> _C57 | SIN.LV.SF.PRE | LIVER          | 4 | 43484237  | - | NM_019436    | Sit1          | - |
| DMM34 | Cdkn2a <sup>-/-</sup> _C57 | SIN.LV.SF.PRE | LIVER          | 4 | 44906906  | - | NM_177027    | Zcchc7        | + |
| DMM34 | Cdkn2a <sup>-/-</sup> _C57 | SIN.LV.SF.PRE | LIVER          | 4 | 45507494  | + | NM_001009949 | Mcart1        | - |
| DMM34 | Cdkn2a <sup>-/-</sup> _C57 | SIN.LV.SF.PRE | LIVER          | 4 | 49296723  | - | NM_178756    | E130309F12Rik | + |
| DMM34 | Cdkn2a <sup>-/-</sup> _C57 | SIN.LV.SF.PRE | LIVER          | 4 | 49666787  | + | NM_182999    | Rnf20         | + |
| DMM34 | Cdkn2a <sup>-/-</sup> _C57 | SIN.LV.SF.PRE | LIVER          | 4 | 52486271  | - | NM_008017    | Smc2          | + |
| DMM25 | Cdkn2a <sup>-/-</sup> _C57 | SIN.LV.SF.PRE | LIVER          | 4 | 58853542  | + | NM_172381    | AI314180      | - |
| DMM30 | Cdkn2a <sup>-/-</sup> _C57 | SIN.LV.SF.PRE | LIVER          | 4 | 58907137  | + | NM_172381    | AI314180      | - |
| DMM34 | Cdkn2a <sup>-/-</sup> _C57 | SIN.LV.SF.PRE | LIVER          | 4 | 62046188  | - | NM_175090    | Slc31a1       | + |
| DMM22 | Cdkn2a <sup>-/-</sup> _C57 | SIN.LV.SF.PRE | LIVER          | 4 | 71147671  | + | NM_011599    | Tle1          | - |
| DMM22 | Cdkn2a <sup>-/-</sup> _C57 | SIN.LV.SF.PRE | LIVER          | 4 | 73934592  | - | NM_144787    | Kdm4c         | + |
| DMM25 | Cdkn2a <sup>-/-</sup> _C57 | SIN.LV.SF.PRE | LIVER          | 4 | 73977541  | - | NM_144787    | Kdm4c         | + |
| DMM34 | Cdkn2a <sup>-/-</sup> _C57 | SIN.LV.SF.PRE | LIVER          | 4 | 76443275  | + | NM_011211    | Ptpd          | - |
| DMM34 | Cdkn2a <sup>-/-</sup> _C57 | SIN.LV.SF.PRE | LIVER          | 4 | 82068031  | + | NM_001113209 | Nfib          | - |
| DMM32 | Cdkn2a <sup>-/-</sup> _C57 | SIN.LV.SF.PRE | LIVER          | 4 | 102860360 | + | NM_177732    | Slc35d1       | - |
| DMM32 | Cdkn2a <sup>-/-</sup> _C57 | SIN.LV.SF.PRE | LIVER          | 4 | 106038906 | + | NM_153565    | Pcsk9         | - |
| DMM31 | Cdkn2a <sup>-/-</sup> _C57 | SIN.LV.SF.PRE | LIVER          | 4 | 108183389 | + | NM_175472    | Zcchc11       | + |
| DMM31 | Cdkn2a <sup>-/-</sup> _C57 | SIN.LV.SF.PRE | LIVER          | 4 | 108959444 | + | NM_007943    | Eps15         | + |

|       |                            |               |              |   |           |   |              |               |   |
|-------|----------------------------|---------------|--------------|---|-----------|---|--------------|---------------|---|
| DMM31 | Cdkn2a <sup>-/-</sup> _C57 | SIN.LV.SF.PRE | LIVER        | 4 | 108959625 | - | NM_007943    | Eps15         | + |
| DMM31 | Cdkn2a <sup>-/-</sup> _C57 | SIN.LV.SF.PRE | LIVER        | 4 | 108959649 | - | NM_007943    | Eps15         | + |
| DMM34 | Cdkn2a <sup>-/-</sup> _C57 | SIN.LV.SF.PRE | LIVER        | 4 | 109637428 | + | NM_007983    | Faf1          | + |
| DMM32 | Cdkn2a <sup>-/-</sup> _C57 | SIN.LV.SF.PRE | LIVER        | 4 | 123050232 | + | NM_009600    | Macf1         | - |
| DMM30 | Cdkn2a <sup>-/-</sup> _C57 | SIN.LV.SF.PRE | LIVER        | 4 | 125861557 | + | NM_146153    | Thrap3        | - |
| DMM19 | Cdkn2a <sup>-/-</sup> _C57 | SIN.LV.SF.PRE | LIVER        | 4 | 142758795 | + | NM_001081355 | Prdm2         | - |
| DMM22 | Cdkn2a <sup>-/-</sup> _C57 | SIN.LV.SF.PRE | SPLEEN       | 4 | 144653579 | + | NM_001128198 | Vps13d        | - |
| DMM34 | Cdkn2a <sup>-/-</sup> _C57 | SIN.LV.SF.PRE | LIVER        | 4 | 148635894 | + | NM_008441    | Kif1b         | - |
| DMM34 | Cdkn2a <sup>-/-</sup> _C57 | SIN.LV.SF.PRE | LIVER        | 4 | 149659516 | - | NM_001085492 | Rere          | + |
| DMM30 | Cdkn2a <sup>-/-</sup> _C57 | SIN.LV.SF.PRE | LIVER        | 4 | 155077092 | - | NM_026899    | Ssu72         | + |
| DMM19 | Cdkn2a <sup>-/-</sup> _C57 | SIN.LV.SF.PRE | LIVER        | 5 | 3886022   | + | NM_001013023 | Mterf         | - |
| DMM25 | Cdkn2a <sup>-/-</sup> _C57 | SIN.LV.SF.PRE | LIVER        | 5 | 4030184   | + | NM_194462    | Akap9         | + |
| DMM30 | Cdkn2a <sup>-/-</sup> _C57 | SIN.LV.SF.PRE | LIVER        | 5 | 5187480   | - | NM_011074    | Pftk1         | - |
| DMM32 | Cdkn2a <sup>-/-</sup> _C57 | SIN.LV.SF.PRE | LIVER        | 5 | 5826087   | - | NM_027399    | Steap1        | - |
| DMM34 | Cdkn2a <sup>-/-</sup> _C57 | SIN.LV.SF.PRE | LIVER        | 5 | 9312234   | - | NM_172706    | 9330182L06Rik | + |
| DMM34 | Cdkn2a <sup>-/-</sup> _C57 | SIN.LV.SF.PRE | LIVER        | 5 | 15914049  | - | NM_001110843 | Cacna2d1      | + |
| DMM32 | Cdkn2a <sup>-/-</sup> _C57 | SIN.LV.SF.PRE | LIVER        | 5 | 17494993  | + | NM_001081143 | Gnat3         | + |
| DMM34 | Cdkn2a <sup>-/-</sup> _C57 | SIN.LV.SF.PRE | LIVER        | 5 | 23013532  | + | NM_009274    | Srpk2         | - |
| DMM31 | Cdkn2a <sup>-/-</sup> _C57 | SIN.LV.SF.PRE | LIVER        | 5 | 46089427  | + | NM_019438    | Ncapg         | + |
| DMM32 | Cdkn2a <sup>-/-</sup> _C57 | SIN.LV.SF.PRE | LIVER        | 5 | 46122859  | + | NM_172153    | Lcorl         | - |
| DMM34 | Cdkn2a <sup>-/-</sup> _C57 | SIN.LV.SF.PRE | LIVER        | 5 | 46487075  | + | NM_178142    | Lcorl         | - |
| DMM25 | Cdkn2a <sup>-/-</sup> _C57 | SIN.LV.SF.PRE | LIVER        | 5 | 52553953  | - | NM_001042620 | Dhx15         | - |
| DMM22 | Cdkn2a <sup>-/-</sup> _C57 | SIN.LV.SF.PRE | LIVER        | 5 | 54429028  | + | NM_001081103 | Stim2         | + |
| DMM22 | Cdkn2a <sup>-/-</sup> _C57 | SIN.LV.SF.PRE | VER - SPLEEN | 5 | 60235564  | + | NM_001122758 | Pcdh7         | + |
| DMM32 | Cdkn2a <sup>-/-</sup> _C57 | SIN.LV.SF.PRE | LIVER        | 5 | 60338027  | + | NM_001122758 | Pcdh7         | + |
| DMM32 | Cdkn2a <sup>-/-</sup> _C57 | SIN.LV.SF.PRE | LIVER        | 5 | 63041330  | + | NM_178407    | Arap2         | - |
| DMM22 | Cdkn2a <sup>-/-</sup> _C57 | SIN.LV.SF.PRE | VER - SPLEEN | 5 | 63089133  | - | NM_178407    | Arap2         | - |
| DMM34 | Cdkn2a <sup>-/-</sup> _C57 | SIN.LV.SF.PRE | LIVER        | 5 | 69568978  | + | NM_175519    | Kctd8         | - |
| DMM34 | Cdkn2a <sup>-/-</sup> _C57 | SIN.LV.SF.PRE | LIVER        | 5 | 77050303  | + | NM_199032    | Cep135        | + |
| DMM25 | Cdkn2a <sup>-/-</sup> _C57 | SIN.LV.SF.PRE | LIVER        | 5 | 87352730  | - | NM_152811    | Ugt2b1        | - |
| DMM34 | Cdkn2a <sup>-/-</sup> _C57 | SIN.LV.SF.PRE | LIVER        | 5 | 89017021  | + | NM_027530    | Rufy3         | + |

|       |                            |               |                |   |           |   |              |          |   |
|-------|----------------------------|---------------|----------------|---|-----------|---|--------------|----------|---|
| DMM22 | Cdkn2a <sup>-/-</sup> _C57 | SIN.LV.SF.PRE | SPLEEN         | 5 | 89090442  | + | NM_001098476 | Grsf1    | - |
| DMM34 | Cdkn2a <sup>-/-</sup> _C57 | SIN.LV.SF.PRE | LIVER          | 5 | 89397802  | + | NM_001136260 | Slc4a4   | + |
| DMM32 | Cdkn2a <sup>-/-</sup> _C57 | SIN.LV.SF.PRE | LIVER          | 5 | 90745268  | + | NM_030886    | Ankrd17  | - |
| DMM34 | Cdkn2a <sup>-/-</sup> _C57 | SIN.LV.SF.PRE | LIVER          | 5 | 99706134  | + | NM_145839    | Rasgef1b | - |
| DMM34 | Cdkn2a <sup>-/-</sup> _C57 | SIN.LV.SF.PRE | LIVER          | 5 | 100402402 | + | NM_001077265 | Hnrnpd   | - |
| DMM34 | Cdkn2a <sup>-/-</sup> _C57 | SIN.LV.SF.PRE | LIVER          | 5 | 103387343 | - | NM_001081567 | Mapk10   | - |
| DMM34 | Cdkn2a <sup>-/-</sup> _C57 | SIN.LV.SF.PRE | LIVER          | 5 | 104166704 | - | NM_133919    | Aff1     | + |
| DMM25 | Cdkn2a <sup>-/-</sup> _C57 | SIN.LV.SF.PRE | LIVER          | 5 | 104980153 | + | NR_024083    | BC005561 | + |
| DMM25 | Cdkn2a <sup>-/-</sup> _C57 | SIN.LV.SF.PRE | LIVER          | 5 | 113414470 | - | NM_001035531 | Adrbk2   | - |
| DMM34 | Cdkn2a <sup>-/-</sup> _C57 | SIN.LV.SF.PRE | LIVER          | 5 | 122165256 | - | NM_009125    | Atxn2    | + |
| DMM31 | Cdkn2a <sup>-/-</sup> _C57 | SIN.LV.SF.PRE | LIVER          | 5 | 122939123 | - | NM_001110140 | Atp2a2   | - |
| DMM22 | Cdkn2a <sup>-/-</sup> _C57 | SIN.LV.SF.PRE | LIVER          | 5 | 123482252 | - | NM_175423    | Orai1    | + |
| DMM34 | Cdkn2a <sup>-/-</sup> _C57 | SIN.LV.SF.PRE | LIVER          | 5 | 123861992 | - | NM_133917    | Mlxip    | + |
| DMM22 | Cdkn2a <sup>-/-</sup> _C57 | SIN.LV.SF.PRE | SPLEEN         | 5 | 124194591 | + | NM_001005523 | Rsrc2    | - |
| DMM34 | Cdkn2a <sup>-/-</sup> _C57 | SIN.LV.SF.PRE | LIVER          | 5 | 125962837 | - | NM_030210    | Aacs     | + |
| DMM25 | Cdkn2a <sup>-/-</sup> _C57 | SIN.LV.SF.PRE | LIVER          | 5 | 130784600 | + | NM_001015876 | Tyw1     | + |
| DMM22 | Cdkn2a <sup>-/-</sup> _C57 | SIN.LV.SF.PRE | LIVER - SPLEEN | 5 | 130804349 | + | NM_001015876 | Tyw1     | + |
| DMM22 | Cdkn2a <sup>-/-</sup> _C57 | SIN.LV.SF.PRE | LIVER          | 5 | 149718290 | + | NM_153572    | Katnal1  | - |
| DMM22 | Cdkn2a <sup>-/-</sup> _C57 | SIN.LV.SF.PRE | SPLEEN         | 5 | 150070615 | - | NM_009663    | Alox5ap  | + |
| DMM22 | Cdkn2a <sup>-/-</sup> _C57 | SIN.LV.SF.PRE | SPLEEN         | 6 | 4429940   | + | NM_007743    | Col1a2   | + |
| DMM22 | Cdkn2a <sup>-/-</sup> _C57 | SIN.LV.SF.PRE | LIVER          | 6 | 4896932   | - | NM_181595    | Ppp1r9a  | + |
| DMM30 | Cdkn2a <sup>-/-</sup> _C57 | SIN.LV.SF.PRE | LIVER          | 6 | 8177470   | + | NM_145374    | Mios     | + |
| DMM22 | Cdkn2a <sup>-/-</sup> _C57 | SIN.LV.SF.PRE | SPLEEN         | 6 | 8229667   | - | NM_026632    | Rpa3     | - |
| DMM34 | Cdkn2a <sup>-/-</sup> _C57 | SIN.LV.SF.PRE | LIVER          | 6 | 8536196   | - | NM_133236    | Glecc1   | + |
| DMM30 | Cdkn2a <sup>-/-</sup> _C57 | SIN.LV.SF.PRE | LIVER          | 6 | 15693281  | + | NM_175088    | Mdfic    | + |
| DMM34 | Cdkn2a <sup>-/-</sup> _C57 | SIN.LV.SF.PRE | LIVER          | 6 | 18436283  | - | NM_080285    | Ctnbp2   | - |
| DMM23 | Cdkn2a <sup>-/-</sup> _C57 | SIN.LV.SF.PRE | SPLEEN         | 6 | 26133938  | - | NM_133931    | Pot1a    | - |
| DMM25 | Cdkn2a <sup>-/-</sup> _C57 | SIN.LV.SF.PRE | LIVER          | 6 | 32104818  | - | NM_175750    | Plxna4   | - |
| DMM32 | Cdkn2a <sup>-/-</sup> _C57 | SIN.LV.SF.PRE | LIVER          | 6 | 34561979  | - | NM_145575    | Cald1    | + |
| DMM25 | Cdkn2a <sup>-/-</sup> _C57 | SIN.LV.SF.PRE | LIVER          | 6 | 39595783  | + | NM_139294    | Braf     | - |
| DMM32 | Cdkn2a <sup>-/-</sup> _C57 | SIN.LV.SF.PRE | LIVER          | 6 | 39596611  | - | NM_139294    | Braf     | - |

|       |                            |               |                |   |           |   |              |               |   |
|-------|----------------------------|---------------|----------------|---|-----------|---|--------------|---------------|---|
| DMM32 | Cdkn2a <sup>-/-</sup> _C57 | SIN.LV.SF.PRE | LIVER          | 6 | 39664835  | - | NM_139294    | Braf          | - |
| DMM34 | Cdkn2a <sup>-/-</sup> _C57 | SIN.LV.SF.PRE | LIVER          | 6 | 39667988  | - | NM_139294    | Braf          | - |
| DMM25 | Cdkn2a <sup>-/-</sup> _C57 | SIN.LV.SF.PRE | LIVER          | 6 | 41460334  | + | NM_009430    | Prss2         | + |
| DMM22 | Cdkn2a <sup>-/-</sup> _C57 | SIN.LV.SF.PRE | LIVER          | 6 | 43297898  | - | NM_013861    | Tpk1          | - |
| DMM19 | Cdkn2a <sup>-/-</sup> _C57 | SIN.LV.SF.PRE | LIVER          | 6 | 43590429  | + | NM_013861    | Tpk1          | - |
| DMM22 | Cdkn2a <sup>-/-</sup> _C57 | SIN.LV.SF.PRE | LIVER          | 6 | 47459625  | + | NM_012042    | Cul1          | + |
| DMM22 | Cdkn2a <sup>-/-</sup> _C57 | SIN.LV.SF.PRE | SPLEEN         | 6 | 49883192  | - | NM_023456    | Npy           | + |
| DMM26 | Cdkn2a <sup>-/-</sup> _C57 | SIN.LV.SF.PRE | LIVER          | 6 | 56710288  | - | NM_030235    | Avl9          | + |
| DMM19 | Cdkn2a <sup>-/-</sup> _C57 | SIN.LV.SF.PRE | LIVER          | 6 | 58870762  | + | NM_028705    | Herc3         | + |
| DMM34 | Cdkn2a <sup>-/-</sup> _C57 | SIN.LV.SF.PRE | LIVER          | 6 | 61376622  | + | NM_009221    | Snca          | - |
| DMM22 | Cdkn2a <sup>-/-</sup> _C57 | SIN.LV.SF.PRE | LIVER          | 6 | 64009383  | + | NM_008167    | Grid2         | + |
| DMM32 | Cdkn2a <sup>-/-</sup> _C57 | SIN.LV.SF.PRE | LIVER          | 6 | 70810636  | + | NM_010121    | Eif2ak3       | + |
| DMM34 | Cdkn2a <sup>-/-</sup> _C57 | SIN.LV.SF.PRE | LIVER          | 6 | 72063951  | - | NM_001035228 | St3gal5       | + |
| DMM31 | Cdkn2a <sup>-/-</sup> _C57 | SIN.LV.SF.PRE | LIVER          | 6 | 91839508  | - | NM_172730    | C130022K22Rik | + |
| DMM34 | Cdkn2a <sup>-/-</sup> _C57 | SIN.LV.SF.PRE | LIVER          | 6 | 97828221  | + | NM_001113198 | Mitf          | + |
| DMM34 | Cdkn2a <sup>-/-</sup> _C57 | SIN.LV.SF.PRE | LIVER          | 6 | 106733927 | + | NM_021449    | Crbn          | - |
| DMM22 | Cdkn2a <sup>-/-</sup> _C57 | SIN.LV.SF.PRE | LIVER - SPLEEN | 6 | 107677438 | + | NM_008516    | Lrrn1         | + |
| DMM22 | Cdkn2a <sup>-/-</sup> _C57 | SIN.LV.SF.PRE | SPLEEN         | 6 | 107677515 | - | NM_008516    | Lrrn1         | + |
| DMM30 | Cdkn2a <sup>-/-</sup> _C57 | SIN.LV.SF.PRE | LIVER          | 6 | 108193653 | + | NM_010585    | Itrp1         | + |
| DMM34 | Cdkn2a <sup>-/-</sup> _C57 | SIN.LV.SF.PRE | LIVER          | 6 | 108421752 | - | NM_010585    | Itrp1         | + |
| DMM22 | Cdkn2a <sup>-/-</sup> _C57 | SIN.LV.SF.PRE | LIVER          | 6 | 108431549 | - | NM_010585    | Itrp1         | + |
| DMM30 | Cdkn2a <sup>-/-</sup> _C57 | SIN.LV.SF.PRE | LIVER          | 6 | 108760566 | - | NM_026011    | Arl8b         | + |
| DMM22 | Cdkn2a <sup>-/-</sup> _C57 | SIN.LV.SF.PRE | LIVER          | 6 | 116040474 | - | NM_026376    | Plxnd1        | - |
| DMM34 | Cdkn2a <sup>-/-</sup> _C57 | SIN.LV.SF.PRE | LIVER          | 6 | 116587463 | - | NM_178045    | Rassf4        | - |
| DMM30 | Cdkn2a <sup>-/-</sup> _C57 | SIN.LV.SF.PRE | LIVER          | 6 | 119920697 | - | NM_198703    | Wnk1          | - |
| DMM31 | Cdkn2a <sup>-/-</sup> _C57 | SIN.LV.SF.PRE | LIVER          | 6 | 120792980 | + | NM_153516    | Bcl2l13       | + |
| DMM34 | Cdkn2a <sup>-/-</sup> _C57 | SIN.LV.SF.PRE | LIVER          | 6 | 122233056 | - | NM_016970    | Klrg1         | - |
| DMM30 | Cdkn2a <sup>-/-</sup> _C57 | SIN.LV.SF.PRE | LIVER          | 6 | 123076506 | - | NM_011999    | Clec4a2       | + |
| DMM19 | Cdkn2a <sup>-/-</sup> _C57 | SIN.LV.SF.PRE | LIVER          | 6 | 133072626 | + | NM_021562    | Tas2r140      | - |
| DMM34 | Cdkn2a <sup>-/-</sup> _C57 | SIN.LV.SF.PRE | LIVER          | 6 | 136538454 | + | NM_019426    | Atf7ip        | + |
| DMM19 | Cdkn2a <sup>-/-</sup> _C57 | SIN.LV.SF.PRE | LIVER          | 6 | 138044559 | + | NM_177787    | Slc15a5       | - |



|       |                            |               |        |   |           |   |              |               |   |
|-------|----------------------------|---------------|--------|---|-----------|---|--------------|---------------|---|
| DMM31 | Cdkn2a <sup>-/-</sup> _C57 | SIN.LV.SF.PRE | LIVER  | 6 | 139825801 | + | NM_011084    | Pik3c2g       | + |
| DMM19 | Cdkn2a <sup>-/-</sup> _C57 | SIN.LV.SF.PRE | LIVER  | 6 | 142318698 | + | NM_023042    | Recql         | - |
| DMM19 | Cdkn2a <sup>-/-</sup> _C57 | SIN.LV.SF.PRE | LIVER  | 6 | 145169042 | + | NM_021284    | Kras          | - |
| DMM22 | Cdkn2a <sup>-/-</sup> _C57 | SIN.LV.SF.PRE | LIVER  | 6 | 148361859 | - | NM_198967    | Tmtc1         | - |
| DMM22 | Cdkn2a <sup>-/-</sup> _C57 | SIN.LV.SF.PRE | LIVER  | 7 | 7157841   | - | NM_145577    | BC023179      | - |
| DMM22 | Cdkn2a <sup>-/-</sup> _C57 | SIN.LV.SF.PRE | LIVER  | 7 | 13006081  | - | NM_001033820 | Zfp551        | - |
| DMM34 | Cdkn2a <sup>-/-</sup> _C57 | SIN.LV.SF.PRE | LIVER  | 7 | 14832147  | - | NM_001081325 | Gm6957        | - |
| DMM34 | Cdkn2a <sup>-/-</sup> _C57 | SIN.LV.SF.PRE | LIVER  | 7 | 20450521  | + | NM_001033419 | Ceacam16      | - |
| DMM34 | Cdkn2a <sup>-/-</sup> _C57 | SIN.LV.SF.PRE | LIVER  | 7 | 30782588  | + | NM_001033355 | Zfp568        | + |
| DMM32 | Cdkn2a <sup>-/-</sup> _C57 | SIN.LV.SF.PRE | LIVER  | 7 | 30891864  | + | NM_011981    | Zfp260        | + |
| DMM19 | Cdkn2a <sup>-/-</sup> _C57 | SIN.LV.SF.PRE | LIVER  | 7 | 35170145  | - | NM_025948    | Lsm14a        | - |
| DMM22 | Cdkn2a <sup>-/-</sup> _C57 | SIN.LV.SF.PRE | SPLEEN | 7 | 36556351  | + | NM_177739    | Zfp507        | - |
| DMM34 | Cdkn2a <sup>-/-</sup> _C57 | SIN.LV.SF.PRE | LIVER  | 7 | 36777578  | + | NM_177739    | Zfp507        | - |
| DMM34 | Cdkn2a <sup>-/-</sup> _C57 | SIN.LV.SF.PRE | LIVER  | 7 | 46727463  | - | NM_001004139 | Zfp619        | + |
| DMM32 | Cdkn2a <sup>-/-</sup> _C57 | SIN.LV.SF.PRE | LIVER  | 7 | 50710616  | - | NM_026695    | Etfb          | + |
| DMM34 | Cdkn2a <sup>-/-</sup> _C57 | SIN.LV.SF.PRE | LIVER  | 7 | 51892348  | + | NM_028021    | Myh14         | - |
| DMM32 | Cdkn2a <sup>-/-</sup> _C57 | SIN.LV.SF.PRE | LIVER  | 7 | 63310545  | - | NM_010418    | Herc2         | + |
| DMM34 | Cdkn2a <sup>-/-</sup> _C57 | SIN.LV.SF.PRE | LIVER  | 7 | 73803759  | + | NM_080443    | Asb7          | - |
| DMM30 | Cdkn2a <sup>-/-</sup> _C57 | SIN.LV.SF.PRE | LIVER  | 7 | 86819664  | - | NM_029835    | 5730590G19Rik | + |
| DMM25 | Cdkn2a <sup>-/-</sup> _C57 | SIN.LV.SF.PRE | LIVER  | 7 | 87129824  | - | NM_001145999 | Zfp710        | + |
| DMM34 | Cdkn2a <sup>-/-</sup> _C57 | SIN.LV.SF.PRE | LIVER  | 7 | 94537207  | - | NM_015760    | Nox4          | + |
| DMM22 | Cdkn2a <sup>-/-</sup> _C57 | SIN.LV.SF.PRE | LIVER  | 7 | 95637354  | + | NM_028238    | Rab38         | + |
| DMM31 | Cdkn2a <sup>-/-</sup> _C57 | SIN.LV.SF.PRE | LIVER  | 7 | 96368756  | + | NM_028343    | Tmem135       | - |
| DMM19 | Cdkn2a <sup>-/-</sup> _C57 | SIN.LV.SF.PRE | LIVER  | 7 | 96412915  | - | NM_028343    | Tmem135       | - |
| DMM34 | Cdkn2a <sup>-/-</sup> _C57 | SIN.LV.SF.PRE | LIVER  | 7 | 99185868  | - | NM_011807    | Dlg2          | + |
| DMM25 | Cdkn2a <sup>-/-</sup> _C57 | SIN.LV.SF.PRE | LIVER  | 7 | 100071014 | - | NM_028243    | Prpc          | + |
| DMM34 | Cdkn2a <sup>-/-</sup> _C57 | SIN.LV.SF.PRE | LIVER  | 7 | 104787529 | - | NM_001081267 | Rsf1          | + |
| DMM19 | Cdkn2a <sup>-/-</sup> _C57 | SIN.LV.SF.PRE | LIVER  | 7 | 108324179 | + | NM_001146010 | Fchs2         | + |
| DMM19 | Cdkn2a <sup>-/-</sup> _C57 | SIN.LV.SF.PRE | LIVER  | 7 | 114790638 | - | NM_008905    | Ppfbp2        | + |
| DMM31 | Cdkn2a <sup>-/-</sup> _C57 | SIN.LV.SF.PRE | LIVER  | 7 | 117609948 | - | NM_009627    | Adm           | + |
| DMM22 | Cdkn2a <sup>-/-</sup> _C57 | SIN.LV.SF.PRE | SPLEEN | 7 | 121697199 | - | NM_177382    | Cyp2r1        | - |

|       |                            |               |        |   |           |   |              |               |   |
|-------|----------------------------|---------------|--------|---|-----------|---|--------------|---------------|---|
| DMM34 | Cdkn2a <sup>-/-</sup> _C57 | SIN.LV.SF.PRE | LIVER  | 7 | 121718766 | - | NM_177382    | Cyp2r1        | - |
| DMM32 | Cdkn2a <sup>-/-</sup> _C57 | SIN.LV.SF.PRE | LIVER  | 7 | 123239965 | + | NM_019772    | 1110004F10Rik | + |
| DMM32 | Cdkn2a <sup>-/-</sup> _C57 | SIN.LV.SF.PRE | LIVER  | 7 | 123240085 | - | NM_019772    | 1110004F10Rik | + |
| DMM22 | Cdkn2a <sup>-/-</sup> _C57 | SIN.LV.SF.PRE | SPLEEN | 7 | 123560175 | - | NM_011083    | Pik3c2a       | - |
| DMM34 | Cdkn2a <sup>-/-</sup> _C57 | SIN.LV.SF.PRE | LIVER  | 7 | 130124802 | - | NM_011247    | Rbbp6         | + |
| DMM34 | Cdkn2a <sup>-/-</sup> _C57 | SIN.LV.SF.PRE | LIVER  | 7 | 142115147 | + | NM_001143802 | B830028B13Rik | - |
| DMM31 | Cdkn2a <sup>-/-</sup> _C57 | SIN.LV.SF.PRE | LIVER  | 7 | 148427102 | - | NM_001081118 | Phrf1         | + |
| DMM34 | Cdkn2a <sup>-/-</sup> _C57 | SIN.LV.SF.PRE | LIVER  | 7 | 150805837 | + | NM_175649    | Tnfrsf26      | - |
| DMM34 | Cdkn2a <sup>-/-</sup> _C57 | SIN.LV.SF.PRE | LIVER  | 7 | 152248830 | + | NM_007631    | Ccnd1         | - |
| DMM34 | Cdkn2a <sup>-/-</sup> _C57 | SIN.LV.SF.PRE | LIVER  | 8 | 3317674   | - | NM_001033378 | A430078G23Rik | + |
| DMM34 | Cdkn2a <sup>-/-</sup> _C57 | SIN.LV.SF.PRE | LIVER  | 8 | 4753243   | - | NM_011369    | Shcbp1        | - |
| DMM34 | Cdkn2a <sup>-/-</sup> _C57 | SIN.LV.SF.PRE | LIVER  | 8 | 9130081   | - | NM_173446    | Fam155a       | - |
| DMM22 | Cdkn2a <sup>-/-</sup> _C57 | SIN.LV.SF.PRE | SPLEEN | 8 | 18487829  | + | NM_173189    | Mcph1         | + |
| DMM34 | Cdkn2a <sup>-/-</sup> _C57 | SIN.LV.SF.PRE | LIVER  | 8 | 27170013  | + | NM_207659    | Hook3         | - |
| DMM19 | Cdkn2a <sup>-/-</sup> _C57 | SIN.LV.SF.PRE | LIVER  | 8 | 28380461  | + | NM_007918    | Eif4ebp1      | + |
| DMM19 | Cdkn2a <sup>-/-</sup> _C57 | SIN.LV.SF.PRE | LIVER  | 8 | 37198391  | - | NM_172911    | D8Ert82e      | + |
| DMM22 | Cdkn2a <sup>-/-</sup> _C57 | SIN.LV.SF.PRE | LIVER  | 8 | 37644826  | - | NM_015802    | Dlc1          | - |
| DMM22 | Cdkn2a <sup>-/-</sup> _C57 | SIN.LV.SF.PRE | LIVER  | 8 | 37822864  | - | NM_015802    | Dlc1          | - |
| DMM34 | Cdkn2a <sup>-/-</sup> _C57 | SIN.LV.SF.PRE | LIVER  | 8 | 40747984  | + | NM_001113326 | Msr1          | - |
| DMM34 | Cdkn2a <sup>-/-</sup> _C57 | SIN.LV.SF.PRE | LIVER  | 8 | 41421920  | - | NM_030610    | Fgf20         | - |
| DMM34 | Cdkn2a <sup>-/-</sup> _C57 | SIN.LV.SF.PRE | LIVER  | 8 | 41425943  | - | NM_030610    | Fgf20         | - |
| DMM32 | Cdkn2a <sup>-/-</sup> _C57 | SIN.LV.SF.PRE | LIVER  | 8 | 41430854  | + | NM_030610    | Fgf20         | - |
| DMM31 | Cdkn2a <sup>-/-</sup> _C57 | SIN.LV.SF.PRE | LIVER  | 8 | 44565207  | + | NM_001009547 | Adam26b       | - |
| DMM19 | Cdkn2a <sup>-/-</sup> _C57 | SIN.LV.SF.PRE | LIVER  | 8 | 47819013  | + | NM_008391    | Irf2          | + |
| DMM22 | Cdkn2a <sup>-/-</sup> _C57 | SIN.LV.SF.PRE | SPLEEN | 8 | 47895378  | + | NM_008391    | Irf2          | + |
| DMM25 | Cdkn2a <sup>-/-</sup> _C57 | SIN.LV.SF.PRE | LIVER  | 8 | 58685772  | - | NM_080438    | Gla3          | + |
| DMM22 | Cdkn2a <sup>-/-</sup> _C57 | SIN.LV.SF.PRE | LIVER  | 8 | 58760049  | - | NM_008278    | Hpgd          | + |
| DMM34 | Cdkn2a <sup>-/-</sup> _C57 | SIN.LV.SF.PRE | LIVER  | 8 | 58783783  | - | NM_008278    | Hpgd          | + |
| DMM26 | Cdkn2a <sup>-/-</sup> _C57 | SIN.LV.SF.PRE | LIVER  | 8 | 64492151  | + | NM_001081215 | Ddx60         | + |
| DMM26 | Cdkn2a <sup>-/-</sup> _C57 | SIN.LV.SF.PRE | LIVER  | 8 | 64492312  | - | NM_001081215 | Ddx60         | + |
| DMM32 | Cdkn2a <sup>-/-</sup> _C57 | SIN.LV.SF.PRE | LIVER  | 8 | 70709137  | + | NM_028182    | Sh2d4a        | + |

|       |                            |               |              |   |           |   |              |               |   |
|-------|----------------------------|---------------|--------------|---|-----------|---|--------------|---------------|---|
| DMM30 | Cdkn2a <sup>-/-</sup> _C57 | SIN.LV.SF.PRE | LIVER        | 8 | 71830445  | - | NM_172491    | D130040H23Rik | + |
| DMM32 | Cdkn2a <sup>-/-</sup> _C57 | SIN.LV.SF.PRE | LIVER        | 8 | 72561027  | + | NM_028993    | 9130404D08Rik | - |
| DMM34 | Cdkn2a <sup>-/-</sup> _C57 | SIN.LV.SF.PRE | LIVER        | 8 | 73264032  | - | NM_201607    | Pde4c         | + |
| DMM22 | Cdkn2a <sup>-/-</sup> _C57 | SIN.LV.SF.PRE | VER - SPLEEN | 8 | 82218211  | - | NM_015751    | Abce1         | - |
| DMM30 | Cdkn2a <sup>-/-</sup> _C57 | SIN.LV.SF.PRE | LIVER        | 8 | 88020419  | - | NM_173866    | Gpt2          | + |
| DMM22 | Cdkn2a <sup>-/-</sup> _C57 | SIN.LV.SF.PRE | VER - SPLEEN | 8 | 88194538  | + | NM_001081324 | Neto2         | - |
| DMM22 | Cdkn2a <sup>-/-</sup> _C57 | SIN.LV.SF.PRE | SPLEEN       | 8 | 88366713  | - | NM_199446    | Phkb          | + |
| DMM19 | Cdkn2a <sup>-/-</sup> _C57 | SIN.LV.SF.PRE | LIVER        | 8 | 90746147  | - | NM_007406    | Adcy7         | + |
| DMM19 | Cdkn2a <sup>-/-</sup> _C57 | SIN.LV.SF.PRE | LIVER        | 8 | 91259287  | + | NM_001128169 | Cyld          | + |
| DMM19 | Cdkn2a <sup>-/-</sup> _C57 | SIN.LV.SF.PRE | LIVER        | 8 | 107767981 | + | NM_145604    | D230025D16Rik | + |
| DMM30 | Cdkn2a <sup>-/-</sup> _C57 | SIN.LV.SF.PRE | LIVER        | 8 | 113721292 | + | NM_009149    | Glg1          | - |
| DMM34 | Cdkn2a <sup>-/-</sup> _C57 | SIN.LV.SF.PRE | LIVER        | 8 | 117275917 | + | NM_019573    | Wwox          | + |
| DMM31 | Cdkn2a <sup>-/-</sup> _C57 | SIN.LV.SF.PRE | LIVER        | 8 | 123305899 | - | NM_008320    | Irf8          | + |
| DMM30 | Cdkn2a <sup>-/-</sup> _C57 | SIN.LV.SF.PRE | LIVER        | 9 | 3026739   | + | NM_026303    | Alkbh8        | + |
| DMM32 | Cdkn2a <sup>-/-</sup> _C57 | SIN.LV.SF.PRE | LIVER        | 9 | 5302104   | - | NM_009807    | Casp1         | + |
| DMM31 | Cdkn2a <sup>-/-</sup> _C57 | SIN.LV.SF.PRE | LIVER        | 9 | 5323347   | + | NM_007609    | Casp4         | + |
| DMM31 | Cdkn2a <sup>-/-</sup> _C57 | SIN.LV.SF.PRE | LIVER        | 9 | 5323446   | - | NM_007609    | Casp4         | + |
| DMM34 | Cdkn2a <sup>-/-</sup> _C57 | SIN.LV.SF.PRE | LIVER        | 9 | 7147754   | - | NM_029851    | Dync2h1       | - |
| DMM32 | Cdkn2a <sup>-/-</sup> _C57 | SIN.LV.SF.PRE | LIVER        | 9 | 9213442   | + | NM_027823    | 9030420J04Rik | - |
| DMM34 | Cdkn2a <sup>-/-</sup> _C57 | SIN.LV.SF.PRE | LIVER        | 9 | 10323353  | + | NM_001033359 | Cntn5         | - |
| DMM32 | Cdkn2a <sup>-/-</sup> _C57 | SIN.LV.SF.PRE | LIVER        | 9 | 13358261  | + | NM_001013813 | Maml2         | + |
| DMM34 | Cdkn2a <sup>-/-</sup> _C57 | SIN.LV.SF.PRE | LIVER        | 9 | 15540007  | + | NM_172289    | Slc36a4       | + |
| DMM34 | Cdkn2a <sup>-/-</sup> _C57 | SIN.LV.SF.PRE | LIVER        | 9 | 22179110  | + | NM_028390    | Anln          | - |
| DMM19 | Cdkn2a <sup>-/-</sup> _C57 | SIN.LV.SF.PRE | LIVER        | 9 | 22485330  | + | NM_178415    | Bbs9          | + |
| DMM19 | Cdkn2a <sup>-/-</sup> _C57 | SIN.LV.SF.PRE | LIVER        | 9 | 24268703  | - | NM_172920    | Dpy19l1       | - |
| DMM34 | Cdkn2a <sup>-/-</sup> _C57 | SIN.LV.SF.PRE | LIVER        | 9 | 32551398  | - | NM_001038642 | Ets1          | + |
| DMM31 | Cdkn2a <sup>-/-</sup> _C57 | SIN.LV.SF.PRE | LIVER        | 9 | 35268216  | - | NM_021339    | Cdon          | + |
| DMM30 | Cdkn2a <sup>-/-</sup> _C57 | SIN.LV.SF.PRE | LIVER        | 9 | 35369097  | - | NM_029762    | Hyls1         | - |
| DMM34 | Cdkn2a <sup>-/-</sup> _C57 | SIN.LV.SF.PRE | LIVER        | 9 | 47611075  | - | NM_001025600 | Cadm1         | + |
| DMM22 | Cdkn2a <sup>-/-</sup> _C57 | SIN.LV.SF.PRE | SPLEEN       | 9 | 47837470  | + | NM_172921    | Fam55d        | + |
| DMM31 | Cdkn2a <sup>-/-</sup> _C57 | SIN.LV.SF.PRE | LIVER        | 9 | 50711502  | + | NM_178710    | Sik2          | - |

|       |                            |               |             |    |           |   |              |               |   |
|-------|----------------------------|---------------|-------------|----|-----------|---|--------------|---------------|---|
| DMM32 | Cdkn2a <sup>-/-</sup> _C57 | SIN.LV.SF.PRE | LIVER       | 9  | 50788304  | - | NM_178710    | Sik2          | - |
| DMM34 | Cdkn2a <sup>-/-</sup> _C57 | SIN.LV.SF.PRE | LIVER       | 9  | 61906897  | - | NM_033320    | Glce          | - |
| DMM22 | Cdkn2a <sup>-/-</sup> _C57 | SIN.LV.SF.PRE | SPLEEN      | 9  | 64561517  | + | NM_017382    | Rab11a        | - |
| DMM32 | Cdkn2a <sup>-/-</sup> _C57 | SIN.LV.SF.PRE | LIVER       | 9  | 71968478  | + | NM_011544    | Tcf12         | - |
| DMM31 | Cdkn2a <sup>-/-</sup> _C57 | SIN.LV.SF.PRE | LIVER       | 9  | 79946821  | - | NM_146003    | Senp6         | + |
| DMM22 | Cdkn2a <sup>-/-</sup> _C57 | SIN.LV.SF.PRE | VER - SPLEE | 9  | 79986014  | + | NM_146003    | Senp6         | + |
| DMM22 | Cdkn2a <sup>-/-</sup> _C57 | SIN.LV.SF.PRE | LIVER       | 9  | 84363079  | - | NM_199195    | Bckdhh        | + |
| DMM32 | Cdkn2a <sup>-/-</sup> _C57 | SIN.LV.SF.PRE | LIVER       | 9  | 85354330  | - | NM_001160379 | Fam46a        | - |
| DMM34 | Cdkn2a <sup>-/-</sup> _C57 | SIN.LV.SF.PRE | LIVER       | 9  | 86238087  | - | NM_027394    | Ube2cbp       | - |
| DMM22 | Cdkn2a <sup>-/-</sup> _C57 | SIN.LV.SF.PRE | VER - SPLEE | 9  | 86523436  | + | NM_008615    | Me1           | - |
| DMM34 | Cdkn2a <sup>-/-</sup> _C57 | SIN.LV.SF.PRE | LIVER       | 9  | 88449947  | + | NM_001142943 | 4930422I07Rik | + |
| DMM22 | Cdkn2a <sup>-/-</sup> _C57 | SIN.LV.SF.PRE | SPLEEN      | 9  | 96046180  | - | NM_177352    | Gk5           | + |
| DMM32 | Cdkn2a <sup>-/-</sup> _C57 | SIN.LV.SF.PRE | LIVER       | 9  | 113606557 | + | NM_011052    | Pded6ip       | - |
| DMM32 | Cdkn2a <sup>-/-</sup> _C57 | SIN.LV.SF.PRE | LIVER       | 9  | 113649001 | - | NM_001114347 | Clasp2        | + |
| DMM22 | Cdkn2a <sup>-/-</sup> _C57 | SIN.LV.SF.PRE | VER - SPLEE | 9  | 117953220 | - | NM_001048146 | Azi2          | + |
| DMM22 | Cdkn2a <sup>-/-</sup> _C57 | SIN.LV.SF.PRE | VER - SPLEE | 10 | 9778891   | + | NM_001081344 | Stxbp5        | - |
| DMM34 | Cdkn2a <sup>-/-</sup> _C57 | SIN.LV.SF.PRE | LIVER       | 10 | 12315610  | + | NM_011682    | Utrn          | - |
| DMM22 | Cdkn2a <sup>-/-</sup> _C57 | SIN.LV.SF.PRE | LIVER       | 10 | 12979518  | - | NM_001033257 | Phactr2       | - |
| DMM32 | Cdkn2a <sup>-/-</sup> _C57 | SIN.LV.SF.PRE | LIVER       | 10 | 14677257  | + | NM_008703    | Nmbr          | + |
| DMM31 | Cdkn2a <sup>-/-</sup> _C57 | SIN.LV.SF.PRE | LIVER       | 10 | 16393217  | - | NM_010828    | Cited2        | + |
| DMM34 | Cdkn2a <sup>-/-</sup> _C57 | SIN.LV.SF.PRE | LIVER       | 10 | 17457702  | - | NM_010828    | Cited2        | + |
| DMM32 | Cdkn2a <sup>-/-</sup> _C57 | SIN.LV.SF.PRE | LIVER       | 10 | 18785094  | + | NM_009397    | Tnfaip3       | - |
| DMM34 | Cdkn2a <sup>-/-</sup> _C57 | SIN.LV.SF.PRE | LIVER       | 10 | 18829070  | + | NM_009397    | Tnfaip3       | - |
| DMM30 | Cdkn2a <sup>-/-</sup> _C57 | SIN.LV.SF.PRE | LIVER       | 10 | 26574217  | + | NM_176837    | Arhgap18      | + |
| DMM25 | Cdkn2a <sup>-/-</sup> _C57 | SIN.LV.SF.PRE | LIVER       | 10 | 27895121  | - | NM_008983    | Ptprk         | + |
| DMM31 | Cdkn2a <sup>-/-</sup> _C57 | SIN.LV.SF.PRE | LIVER       | 10 | 28002262  | - | NM_008983    | Ptprk         | + |
| DMM34 | Cdkn2a <sup>-/-</sup> _C57 | SIN.LV.SF.PRE | LIVER       | 10 | 28171334  | - | NM_008983    | Ptprk         | + |
| DMM34 | Cdkn2a <sup>-/-</sup> _C57 | SIN.LV.SF.PRE | LIVER       | 10 | 28316043  | + | NM_008983    | Ptprk         | + |
| DMM22 | Cdkn2a <sup>-/-</sup> _C57 | SIN.LV.SF.PRE | SPLEEN      | 10 | 33647484  | + | NM_028287    | Zufsp         | - |
| DMM31 | Cdkn2a <sup>-/-</sup> _C57 | SIN.LV.SF.PRE | LIVER       | 10 | 33946711  | - | NM_172508    | Dse           | - |
| DMM34 | Cdkn2a <sup>-/-</sup> _C57 | SIN.LV.SF.PRE | LIVER       | 10 | 36280709  | + | NM_001081208 | Hs3st5        | + |

|       |                            |               |              |    |           |   |              |               |   |
|-------|----------------------------|---------------|--------------|----|-----------|---|--------------|---------------|---|
| DMM22 | Cdkn2a <sup>-/-</sup> _C57 | SIN.LV.SF.PRE | LIVER        | 10 | 36864736  | + | NM_008538    | Marcks        | - |
| DMM30 | Cdkn2a <sup>-/-</sup> _C57 | SIN.LV.SF.PRE | LIVER        | 10 | 40129371  | - | NM_198164    | Cdc2l6        | + |
| DMM32 | Cdkn2a <sup>-/-</sup> _C57 | SIN.LV.SF.PRE | LIVER        | 10 | 45183969  | + | NM_001031772 | Lin28b        | - |
| DMM34 | Cdkn2a <sup>-/-</sup> _C57 | SIN.LV.SF.PRE | LIVER        | 10 | 47151028  | - | NM_001111268 | Grik2         | - |
| DMM34 | Cdkn2a <sup>-/-</sup> _C57 | SIN.LV.SF.PRE | LIVER        | 10 | 52098800  | - | NM_053187    | Gopc          | - |
| DMM32 | Cdkn2a <sup>-/-</sup> _C57 | SIN.LV.SF.PRE | LIVER        | 10 | 53708694  | + | NM_008548    | Man1a         | - |
| DMM22 | Cdkn2a <sup>-/-</sup> _C57 | SIN.LV.SF.PRE | LIVER        | 10 | 56272663  | - | NM_010288    | Gja1          | + |
| DMM31 | Cdkn2a <sup>-/-</sup> _C57 | SIN.LV.SF.PRE | LIVER        | 10 | 62734424  | + | NM_026101    | Here4         | + |
| DMM30 | Cdkn2a <sup>-/-</sup> _C57 | SIN.LV.SF.PRE | LIVER        | 10 | 66623785  | + | NM_207221    | Jmjd1c        | + |
| DMM25 | Cdkn2a <sup>-/-</sup> _C57 | SIN.LV.SF.PRE | LIVER        | 10 | 67172365  | + | NM_001005419 | Ado           | - |
| DMM25 | Cdkn2a <sup>-/-</sup> _C57 | SIN.LV.SF.PRE | LIVER        | 10 | 67172453  | - | NM_001005419 | Ado           | - |
| DMM19 | Cdkn2a <sup>-/-</sup> _C57 | SIN.LV.SF.PRE | LIVER        | 10 | 68746940  | - | NM_001081347 | Rhobtb1       | + |
| DMM22 | Cdkn2a <sup>-/-</sup> _C57 | SIN.LV.SF.PRE | LIVER        | 10 | 75113498  | + | NM_172549    | Cabin1        | - |
| DMM22 | Cdkn2a <sup>-/-</sup> _C57 | SIN.LV.SF.PRE | VER - SPLEEN | 10 | 82195378  | - | NM_001081218 | Hcfc2         | + |
| DMM25 | Cdkn2a <sup>-/-</sup> _C57 | SIN.LV.SF.PRE | LIVER        | 10 | 87924450  | + | NM_011517    | Sypc3         | + |
| DMM34 | Cdkn2a <sup>-/-</sup> _C57 | SIN.LV.SF.PRE | LIVER        | 10 | 98647595  | + | NM_027740    | Wdr51b        | + |
| DMM31 | Cdkn2a <sup>-/-</sup> _C57 | SIN.LV.SF.PRE | LIVER        | 10 | 99487461  | - | NM_013598    | Kitl          | + |
| DMM22 | Cdkn2a <sup>-/-</sup> _C57 | SIN.LV.SF.PRE | SPLEEN       | 10 | 99955383  | - | NM_146009    | Cep290        | + |
| DMM34 | Cdkn2a <sup>-/-</sup> _C57 | SIN.LV.SF.PRE | LIVER        | 10 | 99993704  | - | NM_146009    | Cep290        | + |
| DMM25 | Cdkn2a <sup>-/-</sup> _C57 | SIN.LV.SF.PRE | LIVER        | 10 | 100387445 | + | NM_001081246 | 1700017N19Rik | + |
| DMM30 | Cdkn2a <sup>-/-</sup> _C57 | SIN.LV.SF.PRE | LIVER        | 10 | 111116329 | - | NM_009344    | Phlda1        | + |
| DMM34 | Cdkn2a <sup>-/-</sup> _C57 | SIN.LV.SF.PRE | LIVER        | 10 | 117357493 | + | NM_024457    | Rap1b         | - |
| DMM34 | Cdkn2a <sup>-/-</sup> _C57 | SIN.LV.SF.PRE | LIVER        | 10 | 118634845 | + | NM_027994    | Cand1         | - |
| DMM31 | Cdkn2a <sup>-/-</sup> _C57 | SIN.LV.SF.PRE | LIVER        | 10 | 122475338 | - | NM_153395    | Mon2          | - |
| DMM30 | Cdkn2a <sup>-/-</sup> _C57 | SIN.LV.SF.PRE | LIVER        | 10 | 122578184 | - | NM_027604    | Usp15         | - |
| DMM30 | Cdkn2a <sup>-/-</sup> _C57 | SIN.LV.SF.PRE | LIVER        | 10 | 122600602 | + | NM_027604    | Usp15         | - |
| DMM30 | Cdkn2a <sup>-/-</sup> _C57 | SIN.LV.SF.PRE | LIVER        | 10 | 122600644 | + | NM_027604    | Usp15         | - |
| DMM30 | Cdkn2a <sup>-/-</sup> _C57 | SIN.LV.SF.PRE | LIVER        | 10 | 122600676 | - | NM_027604    | Usp15         | - |
| DMM34 | Cdkn2a <sup>-/-</sup> _C57 | SIN.LV.SF.PRE | LIVER        | 10 | 123009538 | - | NM_182807    | Fam19a2       | + |
| DMM30 | Cdkn2a <sup>-/-</sup> _C57 | SIN.LV.SF.PRE | LIVER        | 11 | 3082874   | - | NM_030207    | Sfi1          | - |
| DMM34 | Cdkn2a <sup>-/-</sup> _C57 | SIN.LV.SF.PRE | LIVER        | 11 | 6676285   | + | NM_019511    | Ramp3         | + |

|       |                            |               |              |    |           |   |              |               |   |
|-------|----------------------------|---------------|--------------|----|-----------|---|--------------|---------------|---|
| DMM22 | Cdkn2a <sup>-/-</sup> _C57 | SIN.LV.SF.PRE | LIVER        | 11 | 12397403  | - | NM_172496    | Cobl          | - |
| DMM22 | Cdkn2a <sup>-/-</sup> _C57 | SIN.LV.SF.PRE | LIVER        | 11 | 20001057  | - | NM_146243    | Actr2         | - |
| DMM19 | Cdkn2a <sup>-/-</sup> _C57 | SIN.LV.SF.PRE | LIVER        | 11 | 21100279  | - | NM_139061    | Vps54         | + |
| DMM34 | Cdkn2a <sup>-/-</sup> _C57 | SIN.LV.SF.PRE | LIVER        | 11 | 21155317  | - | NM_139061    | Vps54         | + |
| DMM19 | Cdkn2a <sup>-/-</sup> _C57 | SIN.LV.SF.PRE | LIVER        | 11 | 26031771  | + | NM_025923    | Fancl         | + |
| DMM19 | Cdkn2a <sup>-/-</sup> _C57 | SIN.LV.SF.PRE | LIVER        | 11 | 26031870  | - | NM_025923    | Fancl         | + |
| DMM25 | Cdkn2a <sup>-/-</sup> _C57 | SIN.LV.SF.PRE | LIVER        | 11 | 29142362  | + | NM_025740    | Ccdc104       | - |
| DMM22 | Cdkn2a <sup>-/-</sup> _C57 | SIN.LV.SF.PRE | VER - SPLEEN | 11 | 36846951  | - | NM_011856    | Odz2          | - |
| DMM30 | Cdkn2a <sup>-/-</sup> _C57 | SIN.LV.SF.PRE | LIVER        | 11 | 51085001  | + | NM_007714    | Clk4          | + |
| DMM22 | Cdkn2a <sup>-/-</sup> _C57 | SIN.LV.SF.PRE | SPLEEN       | 11 | 54299727  | + | NM_173753    | Fnip1         | + |
| DMM22 | Cdkn2a <sup>-/-</sup> _C57 | SIN.LV.SF.PRE | VER - SPLEEN | 11 | 65566772  | + | NM_009157    | Map2k4        | - |
| DMM25 | Cdkn2a <sup>-/-</sup> _C57 | SIN.LV.SF.PRE | LIVER        | 11 | 65586790  | + | NM_009157    | Map2k4        | - |
| DMM25 | Cdkn2a <sup>-/-</sup> _C57 | SIN.LV.SF.PRE | LIVER        | 11 | 65586825  | + | NM_009157    | Map2k4        | - |
| DMM25 | Cdkn2a <sup>-/-</sup> _C57 | SIN.LV.SF.PRE | LIVER        | 11 | 65586897  | + | NM_009157    | Map2k4        | - |
| DMM25 | Cdkn2a <sup>-/-</sup> _C57 | SIN.LV.SF.PRE | LIVER        | 11 | 65586906  | + | NM_009157    | Map2k4        | - |
| DMM25 | Cdkn2a <sup>-/-</sup> _C57 | SIN.LV.SF.PRE | LIVER        | 11 | 65586993  | - | NM_009157    | Map2k4        | - |
| DMM34 | Cdkn2a <sup>-/-</sup> _C57 | SIN.LV.SF.PRE | LIVER        | 11 | 71483568  | - | NM_177618    | Wscd1         | + |
| DMM22 | Cdkn2a <sup>-/-</sup> _C57 | SIN.LV.SF.PRE | SPLEEN       | 11 | 86598971  | - | NM_026191    | Dhx40         | - |
| DMM22 | Cdkn2a <sup>-/-</sup> _C57 | SIN.LV.SF.PRE | SPLEEN       | 11 | 86979087  | + | NM_197987    | Trim37        | + |
| DMM34 | Cdkn2a <sup>-/-</sup> _C57 | SIN.LV.SF.PRE | LIVER        | 11 | 94172430  | + | NM_026313    | 3300001P08Rik | - |
| DMM34 | Cdkn2a <sup>-/-</sup> _C57 | SIN.LV.SF.PRE | LIVER        | 11 | 108505425 | + | NM_029606    | Ccdc46        | + |
| DMM22 | Cdkn2a <sup>-/-</sup> _C57 | SIN.LV.SF.PRE | LIVER        | 11 | 108634673 | - | NM_029586    | Ccdc46        | + |
| DMM34 | Cdkn2a <sup>-/-</sup> _C57 | SIN.LV.SF.PRE | LIVER        | 12 | 4348403   | - | NM_010881    | Ncoa1         | - |
| DMM31 | Cdkn2a <sup>-/-</sup> _C57 | SIN.LV.SF.PRE | LIVER        | 12 | 4656521   | - | NM_011365    | Itsn2         | + |
| DMM34 | Cdkn2a <sup>-/-</sup> _C57 | SIN.LV.SF.PRE | LIVER        | 12 | 8753211   | - | NM_001160219 | Pum2          | + |
| DMM34 | Cdkn2a <sup>-/-</sup> _C57 | SIN.LV.SF.PRE | LIVER        | 12 | 15691503  | + | NM_144551    | Trib2         | - |
| DMM25 | Cdkn2a <sup>-/-</sup> _C57 | SIN.LV.SF.PRE | LIVER        | 12 | 21174239  | + | NM_001004364 | Ddef2         | + |
| DMM31 | Cdkn2a <sup>-/-</sup> _C57 | SIN.LV.SF.PRE | LIVER        | 12 | 30945285  | - | NM_172951    | Sntg2         | - |
| DMM34 | Cdkn2a <sup>-/-</sup> _C57 | SIN.LV.SF.PRE | LIVER        | 12 | 36645844  | - | NM_207531    | Agr3          | + |
| DMM31 | Cdkn2a <sup>-/-</sup> _C57 | SIN.LV.SF.PRE | LIVER        | 12 | 41990377  | + | NM_053122    | Immp21        | + |
| DMM34 | Cdkn2a <sup>-/-</sup> _C57 | SIN.LV.SF.PRE | LIVER        | 12 | 46020714  | + | NM_144552    | Stxbp6        | - |

|       |                            |               |              |    |           |   |              |               |   |
|-------|----------------------------|---------------|--------------|----|-----------|---|--------------|---------------|---|
| DMM34 | Cdkn2a <sup>-/-</sup> _C57 | SIN.LV.SF.PRE | LIVER        | 12 | 55682427  | + | NM_134054    | 1110002B05Rik | - |
| DMM22 | Cdkn2a <sup>-/-</sup> _C57 | SIN.LV.SF.PRE | SPLEEN       | 12 | 57441408  | - | NM_145442    | Mbip          | - |
| DMM25 | Cdkn2a <sup>-/-</sup> _C57 | SIN.LV.SF.PRE | LIVER        | 12 | 61788360  | + | NM_178714    | Lrfn5         | + |
| DMM32 | Cdkn2a <sup>-/-</sup> _C57 | SIN.LV.SF.PRE | LIVER        | 12 | 71831659  | - | NM_028127    | Frmd6         | + |
| DMM19 | Cdkn2a <sup>-/-</sup> _C57 | SIN.LV.SF.PRE | LIVER        | 12 | 79340374  | + | NM_172952    | Gphn          | + |
| DMM32 | Cdkn2a <sup>-/-</sup> _C57 | SIN.LV.SF.PRE | LIVER        | 12 | 83531553  | - | NM_172579    | Sipa111       | + |
| DMM26 | Cdkn2a <sup>-/-</sup> _C57 | SIN.LV.SF.PRE | LIVER        | 12 | 92525010  | + | NM_181815    | 4930534B04Rik | - |
| DMM34 | Cdkn2a <sup>-/-</sup> _C57 | SIN.LV.SF.PRE | LIVER        | 12 | 95011993  | - | NM_201518    | Flrt2         | + |
| DMM32 | Cdkn2a <sup>-/-</sup> _C57 | SIN.LV.SF.PRE | LIVER        | 12 | 103134191 | - | NM_028446    | Trip11        | - |
| DMM34 | Cdkn2a <sup>-/-</sup> _C57 | SIN.LV.SF.PRE | LIVER        | 12 | 112589886 | - | NM_183016    | Cdc42bpb      | - |
| DMM34 | Cdkn2a <sup>-/-</sup> _C57 | SIN.LV.SF.PRE | LIVER        | 12 | 119729677 | - | NM_009239    | Sp4           | - |
| DMM22 | Cdkn2a <sup>-/-</sup> _C57 | SIN.LV.SF.PRE | VER - SPLEEN | 13 | 3602765   | - | NM_134063    | BC016423      | - |
| DMM22 | Cdkn2a <sup>-/-</sup> _C57 | SIN.LV.SF.PRE | SPLEEN       | 13 | 6552244   | + | NM_145131    | Pitrm1        | + |
| DMM22 | Cdkn2a <sup>-/-</sup> _C57 | SIN.LV.SF.PRE | VER - SPLEEN | 13 | 12137632  | + | NM_023868    | Ryr2          | - |
| DMM25 | Cdkn2a <sup>-/-</sup> _C57 | SIN.LV.SF.PRE | LIVER        | 13 | 14170914  | + | NM_194262    | Arid4b        | + |
| DMM34 | Cdkn2a <sup>-/-</sup> _C57 | SIN.LV.SF.PRE | LIVER        | 13 | 17808595  | - | NM_001081058 | Cdc215        | - |
| DMM26 | Cdkn2a <sup>-/-</sup> _C57 | SIN.LV.SF.PRE | LIVER        | 13 | 28655360  | + | NM_009238    | Sox4          | - |
| DMM32 | Cdkn2a <sup>-/-</sup> _C57 | SIN.LV.SF.PRE | LIVER        | 13 | 37949101  | + | NM_001039188 | Rreb1         | + |
| DMM30 | Cdkn2a <sup>-/-</sup> _C57 | SIN.LV.SF.PRE | LIVER        | 13 | 47315018  | - | NM_146042    | Rnf144b       | + |
| DMM34 | Cdkn2a <sup>-/-</sup> _C57 | SIN.LV.SF.PRE | LIVER        | 13 | 64304495  | + | NM_001122989 | Cdc14b        | - |
| DMM25 | Cdkn2a <sup>-/-</sup> _C57 | SIN.LV.SF.PRE | LIVER        | 13 | 75898105  | - | NM_138953    | Ell2          | + |
| DMM22 | Cdkn2a <sup>-/-</sup> _C57 | SIN.LV.SF.PRE | LIVER        | 13 | 76778698  | - | NM_030174    | Mctp1         | + |
| DMM23 | Cdkn2a <sup>-/-</sup> _C57 | SIN.LV.SF.PRE | SPLEEN       | 13 | 77578257  | + | NM_001145676 | 2210408I21Rik | + |
| DMM25 | Cdkn2a <sup>-/-</sup> _C57 | SIN.LV.SF.PRE | LIVER        | 13 | 77862686  | + | NM_001145676 | 2210408I21Rik | + |
| DMM25 | Cdkn2a <sup>-/-</sup> _C57 | SIN.LV.SF.PRE | LIVER        | 13 | 77862721  | - | NM_001145676 | 2210408I21Rik | + |
| DMM22 | Cdkn2a <sup>-/-</sup> _C57 | SIN.LV.SF.PRE | VER - SPLEEN | 13 | 81832576  | - | NM_001081176 | Polr3g        | - |
| DMM22 | Cdkn2a <sup>-/-</sup> _C57 | SIN.LV.SF.PRE | LIVER        | 13 | 82216698  | + | NM_007684    | Cetn3         | + |
| DMM22 | Cdkn2a <sup>-/-</sup> _C57 | SIN.LV.SF.PRE | SPLEEN       | 13 | 83770608  | + | NM_025282    | Mef2c         | + |
| DMM22 | Cdkn2a <sup>-/-</sup> _C57 | SIN.LV.SF.PRE | LIVER        | 13 | 88938894  | - | NM_001037987 | Edil3         | + |
| DMM34 | Cdkn2a <sup>-/-</sup> _C57 | SIN.LV.SF.PRE | LIVER        | 13 | 89029864  | + | NM_001037987 | Edil3         | + |
| DMM32 | Cdkn2a <sup>-/-</sup> _C57 | SIN.LV.SF.PRE | LIVER        | 13 | 107767921 | + | NM_001145779 | Kif2a         | - |

|       |                            |               |                |    |           |   |              |               |   |
|-------|----------------------------|---------------|----------------|----|-----------|---|--------------|---------------|---|
| DMM22 | Cdkn2a <sup>-/-</sup> _C57 | SIN.LV.SF.PRE | LIVER          | 13 | 108633478 | - | NM_145456    | Zswim6        | - |
| DMM34 | Cdkn2a <sup>-/-</sup> _C57 | SIN.LV.SF.PRE | LIVER          | 13 | 114163661 | - | NM_023612    | Esm1          | + |
| DMM30 | Cdkn2a <sup>-/-</sup> _C57 | SIN.LV.SF.PRE | LIVER          | 14 | 13136803  | - | NM_146051    | 3830406C13Rik | + |
| DMM34 | Cdkn2a <sup>-/-</sup> _C57 | SIN.LV.SF.PRE | LIVER          | 14 | 17886079  | + | NM_011243    | Rarb          | - |
| DMM22 | Cdkn2a <sup>-/-</sup> _C57 | SIN.LV.SF.PRE | LIVER - SPLEEN | 14 | 19564758  | - | NM_144839    | Ube2e2        | - |
| DMM30 | Cdkn2a <sup>-/-</sup> _C57 | SIN.LV.SF.PRE | LIVER          | 14 | 28281381  | - | NM_001114879 | D14Abbl1e     | + |
| DMM32 | Cdkn2a <sup>-/-</sup> _C57 | SIN.LV.SF.PRE | LIVER          | 14 | 35492555  | + | NM_001004436 | Wapal         | + |
| DMM30 | Cdkn2a <sup>-/-</sup> _C57 | SIN.LV.SF.PRE | LIVER          | 14 | 47901105  | + | NM_080843    | Socs4         | + |
| DMM30 | Cdkn2a <sup>-/-</sup> _C57 | SIN.LV.SF.PRE | LIVER          | 14 | 47901249  | - | NM_080843    | Socs4         | + |
| DMM19 | Cdkn2a <sup>-/-</sup> _C57 | SIN.LV.SF.PRE | LIVER          | 14 | 51663041  | - | NM_183032    | Rnase9        | - |
| DMM22 | Cdkn2a <sup>-/-</sup> _C57 | SIN.LV.SF.PRE | LIVER          | 14 | 62276065  | - | NM_206974    | Kcnrg         | + |
| DMM34 | Cdkn2a <sup>-/-</sup> _C57 | SIN.LV.SF.PRE | LIVER          | 14 | 63333250  | + | NM_008715    | Ints6         | - |
| DMM22 | Cdkn2a <sup>-/-</sup> _C57 | SIN.LV.SF.PRE | LIVER          | 14 | 65553915  | + | NM_177338    | Hmbox1        | - |
| DMM32 | Cdkn2a <sup>-/-</sup> _C57 | SIN.LV.SF.PRE | LIVER          | 14 | 66434369  | - | NM_023209    | Pbk           | + |
| DMM30 | Cdkn2a <sup>-/-</sup> _C57 | SIN.LV.SF.PRE | LIVER          | 14 | 83399772  | - | NM_001013753 | Pcdh17        | + |
| DMM32 | Cdkn2a <sup>-/-</sup> _C57 | SIN.LV.SF.PRE | LIVER          | 14 | 84900437  | + | NM_001013753 | Pcdh17        | + |
| DMM22 | Cdkn2a <sup>-/-</sup> _C57 | SIN.LV.SF.PRE | SPLEEN         | 14 | 87056430  | + | NM_019670    | Diap3         | - |
| DMM34 | Cdkn2a <sup>-/-</sup> _C57 | SIN.LV.SF.PRE | LIVER          | 14 | 87910959  | - | NM_172605    | Tdrd3         | + |
| DMM22 | Cdkn2a <sup>-/-</sup> _C57 | SIN.LV.SF.PRE | SPLEEN         | 14 | 89231456  | - | NM_178685    | Pcdh20        | - |
| DMM26 | Cdkn2a <sup>-/-</sup> _C57 | SIN.LV.SF.PRE | LIVER          | 14 | 90208367  | + | NR_002862    | Gm5088        | + |
| DMM30 | Cdkn2a <sup>-/-</sup> _C57 | SIN.LV.SF.PRE | LIVER          | 14 | 97948226  | + | NM_001038610 | Dach1         | - |
| DMM22 | Cdkn2a <sup>-/-</sup> _C57 | SIN.LV.SF.PRE | SPLEEN         | 14 | 99654297  | - | NM_029320    | Pibf1         | + |
| DMM22 | Cdkn2a <sup>-/-</sup> _C57 | SIN.LV.SF.PRE | SPLEEN         | 14 | 103628763 | - | NM_207215    | Mycbp2        | - |
| DMM31 | Cdkn2a <sup>-/-</sup> _C57 | SIN.LV.SF.PRE | LIVER          | 14 | 115271545 | - | NM_175500    | Gpc5          | + |
| DMM31 | Cdkn2a <sup>-/-</sup> _C57 | SIN.LV.SF.PRE | LIVER          | 14 | 120187377 | + | NM_015820    | Hs6st3        | + |
| DMM30 | Cdkn2a <sup>-/-</sup> _C57 | SIN.LV.SF.PRE | LIVER          | 14 | 120906080 | - | NM_029519    | Rap2a         | + |
| DMM30 | Cdkn2a <sup>-/-</sup> _C57 | SIN.LV.SF.PRE | LIVER          | 14 | 121318011 | - | NM_023579    | Ipo5          | + |
| DMM22 | Cdkn2a <sup>-/-</sup> _C57 | SIN.LV.SF.PRE | SPLEEN         | 14 | 121318118 | - | NM_023579    | Ipo5          | + |
| DMM26 | Cdkn2a <sup>-/-</sup> _C57 | SIN.LV.SF.PRE | LIVER          | 14 | 124377004 | + | NM_010201    | Fgf14         | - |
| DMM26 | Cdkn2a <sup>-/-</sup> _C57 | SIN.LV.SF.PRE | LIVER          | 14 | 124377090 | + | NM_010201    | Fgf14         | - |
| DMM26 | Cdkn2a <sup>-/-</sup> _C57 | SIN.LV.SF.PRE | LIVER          | 14 | 124377157 | - | NM_010201    | Fgf14         | - |



|       |                            |               |        |    |          |   |              |          |   |
|-------|----------------------------|---------------|--------|----|----------|---|--------------|----------|---|
| DMM34 | Cdkn2a <sup>-/-</sup> _C57 | SIN.LV.SF.PRE | LIVER  | 15 | 8369961  | - | NM_027707    | Nipbl    | - |
| DMM34 | Cdkn2a <sup>-/-</sup> _C57 | SIN.LV.SF.PRE | LIVER  | 15 | 12824030 | + | NM_001130149 | Rnasen   | + |
| DMM34 | Cdkn2a <sup>-/-</sup> _C57 | SIN.LV.SF.PRE | LIVER  | 15 | 13317838 | - | NM_007666    | Cdh6     | - |
| DMM32 | Cdkn2a <sup>-/-</sup> _C57 | SIN.LV.SF.PRE | LIVER  | 15 | 19783895 | + | NM_022816    | Acot10   | - |
| DMM22 | Cdkn2a <sup>-/-</sup> _C57 | SIN.LV.SF.PRE | SPLEEN | 15 | 33186420 | - | NM_018755    | Pgcp     | + |
| DMM34 | Cdkn2a <sup>-/-</sup> _C57 | SIN.LV.SF.PRE | LIVER  | 15 | 35585278 | - | NM_177151    | Vps13b   | + |
| DMM34 | Cdkn2a <sup>-/-</sup> _C57 | SIN.LV.SF.PRE | LIVER  | 15 | 39572547 | + | NM_029422    | Tm7sf4   | + |
| DMM34 | Cdkn2a <sup>-/-</sup> _C57 | SIN.LV.SF.PRE | LIVER  | 15 | 40864000 | + | NM_011766    | Zfpm2    | + |
| DMM34 | Cdkn2a <sup>-/-</sup> _C57 | SIN.LV.SF.PRE | LIVER  | 15 | 40864264 | - | NM_011766    | Zfpm2    | + |
| DMM34 | Cdkn2a <sup>-/-</sup> _C57 | SIN.LV.SF.PRE | LIVER  | 15 | 43092048 | - | NM_008388    | Eif3e    | - |
| DMM25 | Cdkn2a <sup>-/-</sup> _C57 | SIN.LV.SF.PRE | LIVER  | 15 | 50779970 | + | NM_032000    | Trps1    | - |
| DMM34 | Cdkn2a <sup>-/-</sup> _C57 | SIN.LV.SF.PRE | LIVER  | 15 | 51809943 | + | NM_009009    | Rad21    | - |
| DMM22 | Cdkn2a <sup>-/-</sup> _C57 | SIN.LV.SF.PRE | SPLEEN | 15 | 53165405 | - | NM_010162    | Ext1     | - |
| DMM34 | Cdkn2a <sup>-/-</sup> _C57 | SIN.LV.SF.PRE | LIVER  | 15 | 55850269 | - | NM_016667    | Sntb1    | - |
| DMM34 | Cdkn2a <sup>-/-</sup> _C57 | SIN.LV.SF.PRE | LIVER  | 15 | 58617043 | - | NM_175212    | Tmem65   | - |
| DMM34 | Cdkn2a <sup>-/-</sup> _C57 | SIN.LV.SF.PRE | LIVER  | 15 | 63005879 | + | NM_031378    | Gsdmc    | - |
| DMM22 | Cdkn2a <sup>-/-</sup> _C57 | SIN.LV.SF.PRE | LIVER  | 15 | 63216664 | - | NM_031378    | Gsdmc    | - |
| DMM32 | Cdkn2a <sup>-/-</sup> _C57 | SIN.LV.SF.PRE | LIVER  | 15 | 63787296 | + | NM_144846    | Fam49b   | - |
| DMM30 | Cdkn2a <sup>-/-</sup> _C57 | SIN.LV.SF.PRE | LIVER  | 15 | 66445453 | + | NM_001081409 | Phf2011  | + |
| DMM32 | Cdkn2a <sup>-/-</sup> _C57 | SIN.LV.SF.PRE | LIVER  | 15 | 66518047 | + | NM_009375    | Tg       | + |
| DMM25 | Cdkn2a <sup>-/-</sup> _C57 | SIN.LV.SF.PRE | LIVER  | 15 | 68209105 | + | NM_001145888 | Zfat     | - |
| DMM32 | Cdkn2a <sup>-/-</sup> _C57 | SIN.LV.SF.PRE | LIVER  | 15 | 69678097 | - | NM_010158    | Khdrbs3  | + |
| DMM34 | Cdkn2a <sup>-/-</sup> _C57 | SIN.LV.SF.PRE | LIVER  | 15 | 93589222 | + | NM_001033217 | Prickle1 | - |
| DMM34 | Cdkn2a <sup>-/-</sup> _C57 | SIN.LV.SF.PRE | LIVER  | 16 | 3725212  | + | NM_019453    | Mefv     | - |
| DMM22 | Cdkn2a <sup>-/-</sup> _C57 | SIN.LV.SF.PRE | LIVER  | 16 | 4384019  | - | NM_009624    | Adcy9    | - |
| DMM34 | Cdkn2a <sup>-/-</sup> _C57 | SIN.LV.SF.PRE | LIVER  | 16 | 17009623 | - | NM_001038663 | Mapk1    | + |
| DMM25 | Cdkn2a <sup>-/-</sup> _C57 | SIN.LV.SF.PRE | LIVER  | 16 | 24105737 | - | NM_009744    | Bcl6     | - |
| DMM25 | Cdkn2a <sup>-/-</sup> _C57 | SIN.LV.SF.PRE | LIVER  | 16 | 24512344 | - | NM_001145952 | Lpp      | + |
| DMM22 | Cdkn2a <sup>-/-</sup> _C57 | SIN.LV.SF.PRE | LIVER  | 16 | 24701311 | + | NM_001145952 | Lpp      | + |
| DMM34 | Cdkn2a <sup>-/-</sup> _C57 | SIN.LV.SF.PRE | LIVER  | 16 | 31095603 | + | NM_030138    | Acap2    | - |
| DMM34 | Cdkn2a <sup>-/-</sup> _C57 | SIN.LV.SF.PRE | LIVER  | 16 | 31267693 | - | NM_025800    | Ppp1r2   | - |

|       |                            |               |              |    |          |   |              |               |   |
|-------|----------------------------|---------------|--------------|----|----------|---|--------------|---------------|---|
| DMM34 | Cdkn2a <sup>-/-</sup> _C57 | SIN.LV.SF.PRE | LIVER        | 16 | 43209641 | + | NR_002445    | BC002163      | + |
| DMM30 | Cdkn2a <sup>-/-</sup> _C57 | SIN.LV.SF.PRE | LIVER        | 16 | 49331926 | + | NM_172616    | C330027C09Rik | + |
| DMM34 | Cdkn2a <sup>-/-</sup> _C57 | SIN.LV.SF.PRE | LIVER        | 16 | 49909671 | - | NM_010581    | Cd47          | + |
| DMM19 | Cdkn2a <sup>-/-</sup> _C57 | SIN.LV.SF.PRE | LIVER        | 16 | 52044167 | - | NM_001033238 | Cblb          | + |
| DMM22 | Cdkn2a <sup>-/-</sup> _C57 | SIN.LV.SF.PRE | LIVER        | 16 | 54068871 | - | NM_178720    | Zpld1         | - |
| DMM34 | Cdkn2a <sup>-/-</sup> _C57 | SIN.LV.SF.PRE | LIVER        | 16 | 56023463 | - | NM_001024622 | Pcnp          | - |
| DMM22 | Cdkn2a <sup>-/-</sup> _C57 | SIN.LV.SF.PRE | LIVER        | 16 | 56123324 | - | NM_001003972 | Senp7         | + |
| DMM19 | Cdkn2a <sup>-/-</sup> _C57 | SIN.LV.SF.PRE | LIVER        | 16 | 62831914 | + | NM_026577    | Arl13b        | - |
| DMM34 | Cdkn2a <sup>-/-</sup> _C57 | SIN.LV.SF.PRE | LIVER        | 16 | 62831984 | - | NM_026577    | Arl13b        | - |
| DMM30 | Cdkn2a <sup>-/-</sup> _C57 | SIN.LV.SF.PRE | LIVER        | 16 | 64959255 | - | NM_008310    | Htr1f         | - |
| DMM34 | Cdkn2a <sup>-/-</sup> _C57 | SIN.LV.SF.PRE | LIVER        | 16 | 78545120 | + | NM_025967    | D16Erd472e    | - |
| DMM25 | Cdkn2a <sup>-/-</sup> _C57 | SIN.LV.SF.PRE | LIVER        | 16 | 80889441 | + | NM_001113208 | Ncam2         | + |
| DMM30 | Cdkn2a <sup>-/-</sup> _C57 | SIN.LV.SF.PRE | LIVER        | 16 | 84856819 | + | NM_008065    | Gabpa         | + |
| DMM31 | Cdkn2a <sup>-/-</sup> _C57 | SIN.LV.SF.PRE | LIVER        | 16 | 85077143 | + | NM_007471    | App           | - |
| DMM31 | Cdkn2a <sup>-/-</sup> _C57 | SIN.LV.SF.PRE | LIVER        | 16 | 85077188 | + | NM_007471    | App           | - |
| DMM31 | Cdkn2a <sup>-/-</sup> _C57 | SIN.LV.SF.PRE | LIVER        | 16 | 85077273 | - | NM_007471    | App           | - |
| DMM22 | Cdkn2a <sup>-/-</sup> _C57 | SIN.LV.SF.PRE | VER - SPLEEN | 16 | 85367135 | - | NM_144853    | Cypr1         | - |
| DMM30 | Cdkn2a <sup>-/-</sup> _C57 | SIN.LV.SF.PRE | LIVER        | 16 | 90980346 | + | NM_026110    | 1810007M14Rik | - |
| DMM34 | Cdkn2a <sup>-/-</sup> _C57 | SIN.LV.SF.PRE | LIVER        | 16 | 92689756 | - | NM_001111023 | Runx1         | - |
| DMM32 | Cdkn2a <sup>-/-</sup> _C57 | SIN.LV.SF.PRE | LIVER        | 16 | 94350707 | - | NM_139145    | Hlcs          | - |
| DMM34 | Cdkn2a <sup>-/-</sup> _C57 | SIN.LV.SF.PRE | LIVER        | 17 | 10179177 | + | NM_001159517 | Qk            | - |
| DMM34 | Cdkn2a <sup>-/-</sup> _C57 | SIN.LV.SF.PRE | LIVER        | 17 | 15870627 | + | NM_007690    | Chd1          | + |
| DMM34 | Cdkn2a <sup>-/-</sup> _C57 | SIN.LV.SF.PRE | LIVER        | 17 | 22067264 | + | NR_003549    | 3110048L19Rik | - |
| DMM22 | Cdkn2a <sup>-/-</sup> _C57 | SIN.LV.SF.PRE | SPLEEN       | 17 | 24542639 | + | NM_001039581 | Abca3         | + |
| DMM25 | Cdkn2a <sup>-/-</sup> _C57 | SIN.LV.SF.PRE | LIVER        | 17 | 37098300 | + | NM_029602    | 1700022C21Rik | + |
| DMM19 | Cdkn2a <sup>-/-</sup> _C57 | SIN.LV.SF.PRE | LIVER        | 17 | 37683933 | + | NM_001005485 | Olfr111       | + |
| DMM34 | Cdkn2a <sup>-/-</sup> _C57 | SIN.LV.SF.PRE | LIVER        | 17 | 38731120 | - | NM_146807    | Olfr136       | + |
| DMM22 | Cdkn2a <sup>-/-</sup> _C57 | SIN.LV.SF.PRE | SPLEEN       | 17 | 43335731 | + | NM_133776    | Gpr110        | + |
| DMM19 | Cdkn2a <sup>-/-</sup> _C57 | SIN.LV.SF.PRE | LIVER        | 17 | 53687462 | - | NM_173449    | 4921523A10Rik | - |
| DMM34 | Cdkn2a <sup>-/-</sup> _C57 | SIN.LV.SF.PRE | LIVER        | 17 | 55848545 | + | NM_028370    | Pot1b         | - |
| DMM25 | Cdkn2a <sup>-/-</sup> _C57 | SIN.LV.SF.PRE | LIVER        | 17 | 65061796 | - | NM_008549    | Man2a1        | + |

|       |                            |               |             |    |          |   |              |               |   |
|-------|----------------------------|---------------|-------------|----|----------|---|--------------|---------------|---|
| DMM22 | Cdkn2a <sup>-/-</sup> _C57 | SIN.LV.SF.PRE | VER - SPLEE | 18 | 3431248  | + | NM_029402    | Cul2          | + |
| DMM22 | Cdkn2a <sup>-/-</sup> _C57 | SIN.LV.SF.PRE | VER - SPLEE | 18 | 4332361  | - | NM_007746    | Map3k8        | - |
| DMM31 | Cdkn2a <sup>-/-</sup> _C57 | SIN.LV.SF.PRE | LIVER       | 18 | 4333112  | - | NM_007746    | Map3k8        | - |
| DMM25 | Cdkn2a <sup>-/-</sup> _C57 | SIN.LV.SF.PRE | LIVER       | 18 | 4333207  | - | NM_007746    | Map3k8        | - |
| DMM32 | Cdkn2a <sup>-/-</sup> _C57 | SIN.LV.SF.PRE | LIVER       | 18 | 4333661  | - | NM_007746    | Map3k8        | - |
| DMM26 | Cdkn2a <sup>-/-</sup> _C57 | SIN.LV.SF.PRE | LIVER       | 18 | 4333776  | - | NM_007746    | Map3k8        | - |
| DMM22 | Cdkn2a <sup>-/-</sup> _C57 | SIN.LV.SF.PRE | LIVER       | 18 | 9801599  | + | NM_130449    | Colec12       | + |
| DMM34 | Cdkn2a <sup>-/-</sup> _C57 | SIN.LV.SF.PRE | LIVER       | 18 | 10577548 | + | NM_001081222 | Esco1         | - |
| DMM22 | Cdkn2a <sup>-/-</sup> _C57 | SIN.LV.SF.PRE | SPLEEN      | 18 | 11840959 | - | NM_001081223 | Rbbp8         | + |
| DMM32 | Cdkn2a <sup>-/-</sup> _C57 | SIN.LV.SF.PRE | LIVER       | 18 | 14819726 | + | NM_001161369 | Ss18          | - |
| DMM34 | Cdkn2a <sup>-/-</sup> _C57 | SIN.LV.SF.PRE | LIVER       | 18 | 14976180 | - | NM_001100449 | Taf4b         | + |
| DMM34 | Cdkn2a <sup>-/-</sup> _C57 | SIN.LV.SF.PRE | LIVER       | 18 | 22448657 | - | NM_027616    | 4921528I01Rik | - |
| DMM22 | Cdkn2a <sup>-/-</sup> _C57 | SIN.LV.SF.PRE | SPLEEN      | 18 | 22449716 | + | NM_027616    | 4921528I01Rik | - |
| DMM25 | Cdkn2a <sup>-/-</sup> _C57 | SIN.LV.SF.PRE | LIVER       | 18 | 26560895 | - | NM_001146292 | Brunol4       | - |
| DMM34 | Cdkn2a <sup>-/-</sup> _C57 | SIN.LV.SF.PRE | LIVER       | 18 | 30448536 | + | NM_181414    | Pik3c3        | + |
| DMM22 | Cdkn2a <sup>-/-</sup> _C57 | SIN.LV.SF.PRE | LIVER       | 18 | 31763156 | + | NM_026165    | Slc25a46      | - |
| DMM22 | Cdkn2a <sup>-/-</sup> _C57 | SIN.LV.SF.PRE | VER - SPLEE | 18 | 33372082 | - | NM_133774    | Stard4        | - |
| DMM19 | Cdkn2a <sup>-/-</sup> _C57 | SIN.LV.SF.PRE | LIVER       | 18 | 35955903 | + | NM_001141923 | Gm9762        | + |
| DMM26 | Cdkn2a <sup>-/-</sup> _C57 | SIN.LV.SF.PRE | LIVER       | 18 | 36762459 | + | NM_175375    | Ankhd1        | + |
| DMM32 | Cdkn2a <sup>-/-</sup> _C57 | SIN.LV.SF.PRE | LIVER       | 18 | 42700540 | - | NM_001039474 | Tcerg1        | + |
| DMM32 | Cdkn2a <sup>-/-</sup> _C57 | SIN.LV.SF.PRE | LIVER       | 18 | 47198394 | - | NM_178377    | Comm10        | + |
| DMM25 | Cdkn2a <sup>-/-</sup> _C57 | SIN.LV.SF.PRE | LIVER       | 18 | 50156489 | - | NM_001081371 | Dmx11         | + |
| DMM22 | Cdkn2a <sup>-/-</sup> _C57 | SIN.LV.SF.PRE | LIVER       | 18 | 53371699 | - | NM_026386    | Snx2          | + |
| DMM22 | Cdkn2a <sup>-/-</sup> _C57 | SIN.LV.SF.PRE | SPLEEN      | 18 | 55295352 | + | NM_175751    | Zfp608        | - |
| DMM22 | Cdkn2a <sup>-/-</sup> _C57 | SIN.LV.SF.PRE | SPLEEN      | 18 | 60373456 | + | NM_001033767 | Gm4951        | + |
| DMM34 | Cdkn2a <sup>-/-</sup> _C57 | SIN.LV.SF.PRE | LIVER       | 18 | 61120219 | + | NM_177407    | Camk2a        | + |
| DMM22 | Cdkn2a <sup>-/-</sup> _C57 | SIN.LV.SF.PRE | VER - SPLEE | 18 | 63938689 | + | NM_001014981 | Wdr7          | + |
| DMM22 | Cdkn2a <sup>-/-</sup> _C57 | SIN.LV.SF.PRE | VER - SPLEE | 18 | 63955890 | + | NM_001014981 | Wdr7          | + |
| DMM32 | Cdkn2a <sup>-/-</sup> _C57 | SIN.LV.SF.PRE | LIVER       | 18 | 64002424 | - | NM_001014981 | Wdr7          | + |
| DMM22 | Cdkn2a <sup>-/-</sup> _C57 | SIN.LV.SF.PRE | SPLEEN      | 18 | 76434032 | + | NM_010754    | Smad2         | + |
| DMM31 | Cdkn2a <sup>-/-</sup> _C57 | SIN.LV.SF.PRE | LIVER       | 18 | 79527994 | - | NM_053099    | Setbp1        | - |

|       |                            |               |              |    |          |   |              |               |   |
|-------|----------------------------|---------------|--------------|----|----------|---|--------------|---------------|---|
| DMM30 | Cdkn2a <sup>+/-</sup> _C57 | SIN.LV.SF.PRE | LIVER        | 18 | 81016884 | + | NM_015805    | Atp9b         | - |
| DMM22 | Cdkn2a <sup>+/-</sup> _C57 | SIN.LV.SF.PRE | VER - SPLEEN | 18 | 84458932 | + | NM_146090    | Zadh2         | + |
| DMM22 | Cdkn2a <sup>+/-</sup> _C57 | SIN.LV.SF.PRE | SPLEEN       | 18 | 84702148 | + | NM_177450    | Cndp1         | - |
| DMM34 | Cdkn2a <sup>+/-</sup> _C57 | SIN.LV.SF.PRE | LIVER        | 18 | 84848445 | + | NM_023149    | Cndp2         | - |
| DMM22 | Cdkn2a <sup>+/-</sup> _C57 | SIN.LV.SF.PRE | LIVER        | 18 | 85029791 | - | NM_025797    | Cyb5          | + |
| DMM22 | Cdkn2a <sup>+/-</sup> _C57 | SIN.LV.SF.PRE | VER - SPLEEN | 18 | 89216893 | - | NM_175542    | Rtnn          | + |
| DMM32 | Cdkn2a <sup>+/-</sup> _C57 | SIN.LV.SF.PRE | LIVER        | 18 | 89772926 | - | NM_001039173 | Dok6          | - |
| DMM30 | Cdkn2a <sup>+/-</sup> _C57 | SIN.LV.SF.PRE | LIVER        | 18 | 90682492 | + | NM_198295    | Tmx3          | + |
| DMM34 | Cdkn2a <sup>+/-</sup> _C57 | SIN.LV.SF.PRE | LIVER        | 19 | 11460122 | + | NM_029499    | Ms4a4c        | + |
| DMM32 | Cdkn2a <sup>+/-</sup> _C57 | SIN.LV.SF.PRE | LIVER        | 19 | 16710425 | - | NM_173028    | Vps13a        | - |
| DMM30 | Cdkn2a <sup>+/-</sup> _C57 | SIN.LV.SF.PRE | LIVER        | 19 | 16801632 | - | NM_173028    | Vps13a        | - |
| DMM34 | Cdkn2a <sup>+/-</sup> _C57 | SIN.LV.SF.PRE | LIVER        | 19 | 17632642 | + | NM_019437    | Rfk           | + |
| DMM34 | Cdkn2a <sup>+/-</sup> _C57 | SIN.LV.SF.PRE | LIVER        | 19 | 18783844 | - | NM_177640    | D030056L22Rik | + |
| DMM34 | Cdkn2a <sup>+/-</sup> _C57 | SIN.LV.SF.PRE | LIVER        | 19 | 21084063 | + | NM_028953    | Tmc1          | - |
| DMM30 | Cdkn2a <sup>+/-</sup> _C57 | SIN.LV.SF.PRE | LIVER        | 19 | 23337933 | + | NM_153808    | Smc5          | - |
| DMM34 | Cdkn2a <sup>+/-</sup> _C57 | SIN.LV.SF.PRE | LIVER        | 19 | 23803998 | + | NM_177034    | Apba1         | + |
| DMM34 | Cdkn2a <sup>+/-</sup> _C57 | SIN.LV.SF.PRE | LIVER        | 19 | 26767187 | - | NM_011416    | Smarca2       | + |
| DMM22 | Cdkn2a <sup>+/-</sup> _C57 | SIN.LV.SF.PRE | SPLEEN       | 19 | 27884751 | + | NM_011265    | Rfx3          | - |
| DMM25 | Cdkn2a <sup>+/-</sup> _C57 | SIN.LV.SF.PRE | LIVER        | 19 | 29644807 | - | NM_001081319 | C030046E11Rik | + |
| DMM34 | Cdkn2a <sup>+/-</sup> _C57 | SIN.LV.SF.PRE | LIVER        | 19 | 30034762 | - | NM_133775    | Il33          | + |
| DMM22 | Cdkn2a <sup>+/-</sup> _C57 | SIN.LV.SF.PRE | VER - SPLEEN | 19 | 39025343 | - | NM_008234    | Hells         | + |
| DMM32 | Cdkn2a <sup>+/-</sup> _C57 | SIN.LV.SF.PRE | LIVER        | 19 | 58191691 | - | NM_181415    | Atrnl1        | + |
| DMM31 | Cdkn2a <sup>+/-</sup> _C57 | SIN.LV.SF.PRE | LIVER        | X  | 6756240  | + | NM_016691    | Clcn5         | - |
| DMM34 | Cdkn2a <sup>+/-</sup> _C57 | SIN.LV.SF.PRE | LIVER        | X  | 7454274  | + | NM_138606    | Pim2          | + |
| DMM19 | Cdkn2a <sup>+/-</sup> _C57 | SIN.LV.SF.PRE | LIVER        | X  | 17169546 | + | NM_028058    | Fundc1        | - |
| DMM22 | Cdkn2a <sup>+/-</sup> _C57 | SIN.LV.SF.PRE | LIVER        | X  | 23180043 | - | NM_175180    | Wdr44         | + |
| DMM19 | Cdkn2a <sup>+/-</sup> _C57 | SIN.LV.SF.PRE | LIVER        | X  | 39153366 | + | NM_001033422 | Thoc2         | - |
| DMM34 | Cdkn2a <sup>+/-</sup> _C57 | SIN.LV.SF.PRE | LIVER        | X  | 39257771 | + | NM_001033422 | Thoc2         | - |
| DMM22 | Cdkn2a <sup>+/-</sup> _C57 | SIN.LV.SF.PRE | LIVER        | X  | 45234502 | + | NM_053123    | Smarca1       | - |
| DMM19 | Cdkn2a <sup>+/-</sup> _C57 | SIN.LV.SF.PRE | LIVER        | X  | 46637121 | - | NM_145951    | Enox2         | - |
| DMM22 | Cdkn2a <sup>+/-</sup> _C57 | SIN.LV.SF.PRE | SPLEEN       | X  | 54602066 | - | NM_152801    | Arhgef6       | - |

|        |                            |                   |        |   |           |   |              |                    |   |
|--------|----------------------------|-------------------|--------|---|-----------|---|--------------|--------------------|---|
| DMM34  | Cdkn2a <sup>-/-</sup> _C57 | SIN.LV.SF.PRE     | LIVER  | X | 72669859  | - | NM_145956    | Brcc3              | + |
| DMM34  | Cdkn2a <sup>-/-</sup> _C57 | SIN.LV.SF.PRE     | LIVER  | X | 75789619  | - | NM_001126321 | OTTMUSG00000017864 | - |
| DMM34  | Cdkn2a <sup>-/-</sup> _C57 | SIN.LV.SF.PRE     | LIVER  | X | 82834618  | - | NM_025729    | Map3k7ip3          | + |
| DMM34  | Cdkn2a <sup>-/-</sup> _C57 | SIN.LV.SF.PRE     | LIVER  | X | 83115776  | + | NM_008194    | Gyk                | - |
| DMM30  | Cdkn2a <sup>-/-</sup> _C57 | SIN.LV.SF.PRE     | LIVER  | X | 84193463  | - | NM_001160403 | Il1rap1l           | - |
| DMM19  | Cdkn2a <sup>-/-</sup> _C57 | SIN.LV.SF.PRE     | LIVER  | X | 105968904 | - | NM_001081477 | Brwd3              | - |
| DMM34  | Cdkn2a <sup>-/-</sup> _C57 | SIN.LV.SF.PRE     | LIVER  | X | 108554495 | - | NM_025949    | Rps6ka6            | - |
| DMM34  | Cdkn2a <sup>-/-</sup> _C57 | SIN.LV.SF.PRE     | LIVER  | X | 108712815 | - | NM_001080549 | Hdx                | - |
| DMM34  | Cdkn2a <sup>-/-</sup> _C57 | SIN.LV.SF.PRE     | LIVER  | X | 108723260 | + | NM_001080549 | Hdx                | - |
| DMM30  | Cdkn2a <sup>-/-</sup> _C57 | SIN.LV.SF.PRE     | LIVER  | X | 110170237 | + | NM_018818    | Chm                | - |
| DMM34  | Cdkn2a <sup>-/-</sup> _C57 | SIN.LV.SF.PRE     | LIVER  | X | 110252407 | - | NM_018818    | Chm                | - |
| DMM32  | Cdkn2a <sup>-/-</sup> _C57 | SIN.LV.SF.PRE     | LIVER  | X | 110272848 | - | NM_018818    | Chm                | - |
| DMM32  | Cdkn2a <sup>-/-</sup> _C57 | SIN.LV.SF.PRE     | LIVER  | X | 110989015 | - | NM_033605    | Dach2              | + |
| DMM34  | Cdkn2a <sup>-/-</sup> _C57 | SIN.LV.SF.PRE     | LIVER  | X | 111563757 | - | NM_172781    | Klhl4              | + |
| DMM31  | Cdkn2a <sup>-/-</sup> _C57 | SIN.LV.SF.PRE     | LIVER  | X | 114869425 | + | NM_001142750 | Tgif2lx2           | + |
| DMM31  | Cdkn2a <sup>-/-</sup> _C57 | SIN.LV.SF.PRE     | LIVER  | X | 114870597 | - | NM_001142750 | Tgif2lx2           | + |
| DMM22  | Cdkn2a <sup>-/-</sup> _C57 | SIN.LV.SF.PRE     | LIVER  | X | 129938814 | + | NM_001105245 | Pcdh19             | - |
| DMM22  | Cdkn2a <sup>-/-</sup> _C57 | SIN.LV.SF.PRE     | LIVER  | X | 129938985 | - | NM_001105245 | Pcdh19             | - |
| DMM22  | Cdkn2a <sup>-/-</sup> _C57 | SIN.LV.SF.PRE     | LIVER  | X | 131417776 | + | NM_031259    | Nxf2               | - |
| DMM22  | Cdkn2a <sup>-/-</sup> _C57 | SIN.LV.SF.PRE     | LIVER  | X | 131418320 | - | NM_031259    | Nxf2               | - |
| DMM25  | Cdkn2a <sup>-/-</sup> _C57 | SIN.LV.SF.PRE     | LIVER  | X | 136940997 | + | NM_177750    | Frmpd3             | + |
| DMM22  | Cdkn2a <sup>-/-</sup> _C57 | SIN.LV.SF.PRE     | LIVER  | X | 138673537 | + | NM_001161430 | Nxt2               | + |
| DMM34  | Cdkn2a <sup>-/-</sup> _C57 | SIN.LV.SF.PRE     | LIVER  | X | 141972918 | - | NM_153319    | Amot               | - |
| DMM22  | Cdkn2a <sup>-/-</sup> _C57 | SIN.LV.SF.PRE     | SPLEEN | X | 147023468 | + | NM_029943    | Apex2              | - |
| DMM32  | Cdkn2a <sup>-/-</sup> _C57 | SIN.LV.SF.PRE     | LIVER  | X | 147979951 | - | NM_001113354 | Phf8               | + |
| DMM31  | Cdkn2a <sup>-/-</sup> _C57 | SIN.LV.SF.PRE     | LIVER  | X | 151765619 | + | NM_016764    | Prdx4              | - |
| DMM141 | Cdkn2a <sup>-/-</sup> _C57 | INS.SIN.LV.SF.GFP | LIVER  | 1 | 4836424   | + | NM_008866    | Lypla1             | + |
| DMM141 | Cdkn2a <sup>-/-</sup> _C57 | INS.SIN.LV.SF.GFP | LIVER  | 1 | 5093713   | + | NM_133826    | Atp6v1h            | + |
| DMM141 | Cdkn2a <sup>-/-</sup> _C57 | INS.SIN.LV.SF.GFP | LIVER  | 1 | 5134948   | + | NM_133826    | Atp6v1h            | + |
| DMM134 | Cdkn2a <sup>-/-</sup> _C57 | INS.SIN.LV.SF.GFP | LIVER  | 1 | 6232781   | + | NM_009826    | Rb1cc1             | + |
| DMM128 | Cdkn2a <sup>-/-</sup> _C57 | INS.SIN.LV.SF.GFP | LIVER  | 1 | 6234869   | - | NM_009826    | Rb1cc1             | + |
| DMM140 | Cdkn2a <sup>-/-</sup> _C57 | INS.SIN.LV.SF.GFP | LIVER  | 1 | 6444009   | - | NM_009826    | Rb1cc1             | + |

|         |                            |                   |       |   |          |   |              |               |   |
|---------|----------------------------|-------------------|-------|---|----------|---|--------------|---------------|---|
| DMM146  | Cdkn2a <sup>-/-</sup> _C57 | INS.SIN.LV.SF.GFP | LIVER | 1 | 7115929  | - | NM_183028    | Pcmt1         | + |
| DMM 139 | Cdkn2a <sup>-/-</sup> _C57 | INS.SIN.LV.SF.GFP | LIVER | 1 | 9729660  | + | NM_173443    | Vcpip1        | - |
| DMM 141 | Cdkn2a <sup>-/-</sup> _C57 | INS.SIN.LV.SF.GFP | LIVER | 1 | 10195890 | - | NM_001102430 | Arfgef1       | - |
| DMM 142 | Cdkn2a <sup>-/-</sup> _C57 | INS.SIN.LV.SF.GFP | LIVER | 1 | 12297694 | - | NM_001160369 | A830018L16Rik | + |
| DMM141  | Cdkn2a <sup>-/-</sup> _C57 | INS.SIN.LV.SF.GFP | LIVER | 1 | 15833474 | - | NM_009352    | Terf1         | + |
| DMM146  | Cdkn2a <sup>-/-</sup> _C57 | INS.SIN.LV.SF.GFP | LIVER | 1 | 16102665 | - | NM_133832    | Rdh10         | + |
| DMM140  | Cdkn2a <sup>-/-</sup> _C57 | INS.SIN.LV.SF.GFP | LIVER | 1 | 16587031 | - | NM_025773    | Ube2w         | - |
| DMM134  | Cdkn2a <sup>-/-</sup> _C57 | INS.SIN.LV.SF.GFP | LIVER | 1 | 18192358 | + | NR_002879    | EG574082      | - |
| DMM 134 | Cdkn2a <sup>-/-</sup> _C57 | INS.SIN.LV.SF.GFP | LIVER | 1 | 21827793 | + | NM_001160139 | Kcnq5         | - |
| DMM128  | Cdkn2a <sup>-/-</sup> _C57 | INS.SIN.LV.SF.GFP | LIVER | 1 | 23472365 | + | NM_001081079 | Ogfr1         | - |
| DMM134  | Cdkn2a <sup>-/-</sup> _C57 | INS.SIN.LV.SF.GFP | LIVER | 1 | 24803108 | - | NM_026719    | Lmbrd1        | + |
| DMM128  | Cdkn2a <sup>-/-</sup> _C57 | INS.SIN.LV.SF.GFP | LIVER | 1 | 27016313 | - | NM_001033764 | 4931408C20Rik | - |
| DMM139  | Cdkn2a <sup>-/-</sup> _C57 | INS.SIN.LV.SF.GFP | LIVER | 1 | 27483419 | + | NM_001033764 | 4931408C20Rik | - |
| DMM134  | Cdkn2a <sup>-/-</sup> _C57 | INS.SIN.LV.SF.GFP | LIVER | 1 | 30926622 | - | NM_001081080 | Phf3          | - |
| DMM 134 | Cdkn2a <sup>-/-</sup> _C57 | INS.SIN.LV.SF.GFP | LIVER | 1 | 33686455 | - | NM_008922    | Prim2         | - |
| DMM141  | Cdkn2a <sup>-/-</sup> _C57 | INS.SIN.LV.SF.GFP | LIVER | 1 | 33836100 | + | NM_133817    | Zfp451        | - |
| DMM134  | Cdkn2a <sup>-/-</sup> _C57 | INS.SIN.LV.SF.GFP | LIVER | 1 | 33845481 | + | NM_133817    | Zfp451        | - |
| DMM 149 | Cdkn2a <sup>-/-</sup> _C57 | INS.SIN.LV.SF.GFP | LIVER | 1 | 33866971 | + | NM_133817    | Zfp451        | - |
| DMM140  | Cdkn2a <sup>-/-</sup> _C57 | INS.SIN.LV.SF.GFP | LIVER | 1 | 34290850 | - | NM_133833    | Dst           | + |
| DMM141  | Cdkn2a <sup>-/-</sup> _C57 | INS.SIN.LV.SF.GFP | LIVER | 1 | 36601700 | + | NM_026241    | Ankrd39       | - |
| DMM140  | Cdkn2a <sup>-/-</sup> _C57 | INS.SIN.LV.SF.GFP | LIVER | 1 | 38077246 | - | NM_198303    | Eif5b         | + |
| DMM128  | Cdkn2a <sup>-/-</sup> _C57 | INS.SIN.LV.SF.GFP | LIVER | 1 | 39665874 | - | NM_170597    | Creg2         | - |
| DMM 142 | Cdkn2a <sup>-/-</sup> _C57 | INS.SIN.LV.SF.GFP | LIVER | 1 | 43551582 | - | NM_010879    | Nck2          | + |
| DMM140  | Cdkn2a <sup>-/-</sup> _C57 | INS.SIN.LV.SF.GFP | LIVER | 1 | 43583849 | - | NM_010879    | Nck2          | + |
| DMM 134 | Cdkn2a <sup>-/-</sup> _C57 | INS.SIN.LV.SF.GFP | LIVER | 1 | 44143557 | - | NM_029368    | 1700029F09Rik | - |
| DMM141  | Cdkn2a <sup>-/-</sup> _C57 | INS.SIN.LV.SF.GFP | LIVER | 1 | 45960890 | + | NM_016917    | Slc40a1       | - |
| DMM141  | Cdkn2a <sup>-/-</sup> _C57 | INS.SIN.LV.SF.GFP | LIVER | 1 | 46884981 | + | NM_172653    | Slc39a10      | - |
| DMM133  | Cdkn2a <sup>-/-</sup> _C57 | INS.SIN.LV.SF.GFP | LIVER | 1 | 46912187 | + | NM_172653    | Slc39a10      | - |
| DMM140  | Cdkn2a <sup>-/-</sup> _C57 | INS.SIN.LV.SF.GFP | LIVER | 1 | 50854363 | - | NM_019790    | Tmeff2        | + |
| DMM141  | Cdkn2a <sup>-/-</sup> _C57 | INS.SIN.LV.SF.GFP | LIVER | 1 | 51592448 | + | NM_028696    | Obfc2a        | - |
| DMM140  | Cdkn2a <sup>-/-</sup> _C57 | INS.SIN.LV.SF.GFP | LIVER | 1 | 52273519 | + | NM_001081081 | Gls           | - |
| DMM 141 | Cdkn2a <sup>-/-</sup> _C57 | INS.SIN.LV.SF.GFP | LIVER | 1 | 53255780 | - | NM_153556    | Pms1          | - |
| DMM133  | Cdkn2a <sup>-/-</sup> _C57 | INS.SIN.LV.SF.GFP | LIVER | 1 | 53845806 | + | NM_133810    | Stk17b        | - |
| DMM141  | Cdkn2a <sup>-/-</sup> _C57 | INS.SIN.LV.SF.GFP | LIVER | 1 | 54347417 | + | NM_030025    | Ccdc150       | + |
| DMM141  | Cdkn2a <sup>-/-</sup> _C57 | INS.SIN.LV.SF.GFP | LIVER | 1 | 54566906 | + | NM_001033194 | Gtf3c3        | - |

|         |                            |                   |       |   |          |   |              |               |   |
|---------|----------------------------|-------------------|-------|---|----------|---|--------------|---------------|---|
| DMM141  | Cdkn2a <sup>-/-</sup> _C57 | INS.SIN.LV.SF.GFP | LIVER | 1 | 54650623 | - | NM_001081433 | Ankrd44       | - |
| DMM 142 | Cdkn2a <sup>-/-</sup> _C57 | INS.SIN.LV.SF.GFP | LIVER | 1 | 55125104 | + | NM_001039710 | Coq10b        | + |
| DMM141  | Cdkn2a <sup>-/-</sup> _C57 | INS.SIN.LV.SF.GFP | LIVER | 1 | 55306261 | - | NM_175439    | Mars2         | + |
| DMM140  | Cdkn2a <sup>-/-</sup> _C57 | INS.SIN.LV.SF.GFP | LIVER | 1 | 55807253 | + | NM_001114663 | Plcl1         | + |
| DMM140  | Cdkn2a <sup>-/-</sup> _C57 | INS.SIN.LV.SF.GFP | LIVER | 1 | 55826680 | - | NM_001114663 | Plcl1         | + |
| DMM 134 | Cdkn2a <sup>-/-</sup> _C57 | INS.SIN.LV.SF.GFP | LIVER | 1 | 56767357 | - | NM_027661    | Hsfy2         | - |
| DMM141  | Cdkn2a <sup>-/-</sup> _C57 | INS.SIN.LV.SF.GFP | LIVER | 1 | 57018048 | + | NM_139146    | Satb2         | - |
| DMM 134 | Cdkn2a <sup>-/-</sup> _C57 | INS.SIN.LV.SF.GFP | LIVER | 1 | 58081843 | - | NM_199007    | Sgol2         | + |
| DMM139  | Cdkn2a <sup>-/-</sup> _C57 | INS.SIN.LV.SF.GFP | LIVER | 1 | 58861545 | - | NM_001080126 | Casp8         | + |
| DMM 133 | Cdkn2a <sup>-/-</sup> _C57 | INS.SIN.LV.SF.GFP | LIVER | 1 | 60508740 | - | NM_198127    | Abi2          | + |
| DMM139  | Cdkn2a <sup>-/-</sup> _C57 | INS.SIN.LV.SF.GFP | LIVER | 1 | 60615402 | - | NM_001045513 | Raph1         | - |
| DMM141  | Cdkn2a <sup>-/-</sup> _C57 | INS.SIN.LV.SF.GFP | LIVER | 1 | 62250192 | + | NM_001081050 | Pard3b        | + |
| DMM140  | Cdkn2a <sup>-/-</sup> _C57 | INS.SIN.LV.SF.GFP | LIVER | 1 | 62285398 | - | NM_001081050 | Pard3b        | + |
| DMM 142 | Cdkn2a <sup>-/-</sup> _C57 | INS.SIN.LV.SF.GFP | LIVER | 1 | 64326148 | + | NM_033563    | Klf7          | - |
| DMM 142 | Cdkn2a <sup>-/-</sup> _C57 | INS.SIN.LV.SF.GFP | LIVER | 1 | 65247146 | + | NM_011086    | Pikfyve       | + |
| DMM128  | Cdkn2a <sup>-/-</sup> _C57 | INS.SIN.LV.SF.GFP | LIVER | 1 | 65252932 | - | NM_011086    | Pikfyve       | + |
| DMM128  | Cdkn2a <sup>-/-</sup> _C57 | INS.SIN.LV.SF.GFP | LIVER | 1 | 65484782 | - | NM_139270    | Pth2r         | + |
| DMM141  | Cdkn2a <sup>-/-</sup> _C57 | INS.SIN.LV.SF.GFP | LIVER | 1 | 66778666 | + | NM_001122738 | 1110028C15Rik | - |
| DMM141  | Cdkn2a <sup>-/-</sup> _C57 | INS.SIN.LV.SF.GFP | LIVER | 1 | 66789322 | + | NM_001122738 | 1110028C15Rik | - |
| DMM130  | Cdkn2a <sup>-/-</sup> _C57 | INS.SIN.LV.SF.GFP | LIVER | 1 | 66792084 | - | NM_001122738 | 1110028C15Rik | - |
| DMM140  | Cdkn2a <sup>-/-</sup> _C57 | INS.SIN.LV.SF.GFP | LIVER | 1 | 66797510 | + | NM_001122738 | 1110028C15Rik | - |
| DMM140  | Cdkn2a <sup>-/-</sup> _C57 | INS.SIN.LV.SF.GFP | LIVER | 1 | 69615248 | + | NM_011770    | Ikzf2         | - |
| DMM140  | Cdkn2a <sup>-/-</sup> _C57 | INS.SIN.LV.SF.GFP | LIVER | 1 | 71088788 | + | NM_007525    | Bard1         | - |
| DMM141  | Cdkn2a <sup>-/-</sup> _C57 | INS.SIN.LV.SF.GFP | LIVER | 1 | 71134118 | + | NM_007525    | Bard1         | - |
| DMM146  | Cdkn2a <sup>-/-</sup> _C57 | INS.SIN.LV.SF.GFP | LIVER | 1 | 71598947 | - | NM_026195    | Atic          | + |
| DMM 128 | Cdkn2a <sup>-/-</sup> _C57 | INS.SIN.LV.SF.GFP | LIVER | 1 | 72662565 | - | NM_018817    | Smarc11       | + |
| DMM139  | Cdkn2a <sup>-/-</sup> _C57 | INS.SIN.LV.SF.GFP | LIVER | 1 | 74766375 | + | NM_024264    | Cyp27a1       | + |
| DMM141  | Cdkn2a <sup>-/-</sup> _C57 | INS.SIN.LV.SF.GFP | LIVER | 1 | 75532479 | - | NM_027886    | Stk11ip       | + |
| DMM 139 | Cdkn2a <sup>-/-</sup> _C57 | INS.SIN.LV.SF.GFP | LIVER | 1 | 76010072 | + | NM_009208    | Slc4a3        | + |
| DMM 149 | Cdkn2a <sup>-/-</sup> _C57 | INS.SIN.LV.SF.GFP | LIVER | 1 | 77196788 | - | NM_007936    | Epha4         | - |
| DMM140  | Cdkn2a <sup>-/-</sup> _C57 | INS.SIN.LV.SF.GFP | LIVER | 1 | 77487363 | + | NM_007936    | Epha4         | - |
| DMM 139 | Cdkn2a <sup>-/-</sup> _C57 | INS.SIN.LV.SF.GFP | LIVER | 1 | 78694800 | + | NM_001033606 | Acsl3         | + |
| DMM128  | Cdkn2a <sup>-/-</sup> _C57 | INS.SIN.LV.SF.GFP | LIVER | 1 | 80261538 | - | NM_016716    | Cul3          | - |
| DMM140  | Cdkn2a <sup>-/-</sup> _C57 | INS.SIN.LV.SF.GFP | LIVER | 1 | 80548216 | + | NM_175291    | Dock10        | - |
| DMM139  | Cdkn2a <sup>-/-</sup> _C57 | INS.SIN.LV.SF.GFP | LIVER | 1 | 82859842 | + | NM_010472    | Agfg1         | + |

|         |                            |                   |       |   |           |   |              |               |   |
|---------|----------------------------|-------------------|-------|---|-----------|---|--------------|---------------|---|
| DMM139  | Cdkn2a <sup>-/-</sup> _C57 | INS.SIN.LV.SF.GFP | LIVER | 1 | 82882284  | - | NM_010472    | Agfg1         | + |
| DMM141  | Cdkn2a <sup>-/-</sup> _C57 | INS.SIN.LV.SF.GFP | LIVER | 1 | 84091860  | - | NM_001003948 | 5033414K04Rik | - |
| DMM139  | Cdkn2a <sup>-/-</sup> _C57 | INS.SIN.LV.SF.GFP | LIVER | 1 | 84327846  | + | NM_152915    | Dner          | - |
| DMM 149 | Cdkn2a <sup>-/-</sup> _C57 | INS.SIN.LV.SF.GFP | LIVER | 1 | 84537073  | - | NM_152915    | Dner          | - |
| DMM140  | Cdkn2a <sup>-/-</sup> _C57 | INS.SIN.LV.SF.GFP | LIVER | 1 | 84817382  | + | NM_133975    | Trip12        | - |
| DMM134  | Cdkn2a <sup>-/-</sup> _C57 | INS.SIN.LV.SF.GFP | LIVER | 1 | 84844918  | + | NM_025386    | Fbxo36        | + |
| DMM146  | Cdkn2a <sup>-/-</sup> _C57 | INS.SIN.LV.SF.GFP | LIVER | 1 | 84913071  | - | NM_027921    | Slc16a14      | - |
| DMM141  | Cdkn2a <sup>-/-</sup> _C57 | INS.SIN.LV.SF.GFP | LIVER | 1 | 89258890  | + | NM_001110212 | Gigyf2        | + |
| DMM140  | Cdkn2a <sup>-/-</sup> _C57 | INS.SIN.LV.SF.GFP | LIVER | 1 | 90125364  | + | NM_013701    | Ugt1a2        | + |
| DMM140  | Cdkn2a <sup>-/-</sup> _C57 | INS.SIN.LV.SF.GFP | LIVER | 1 | 90170739  | + | NM_198652    | 6430706D22Rik | - |
| DMM141  | Cdkn2a <sup>-/-</sup> _C57 | INS.SIN.LV.SF.GFP | LIVER | 1 | 90172492  | - | NM_198652    | 6430706D22Rik | - |
| DMM 134 | Cdkn2a <sup>-/-</sup> _C57 | INS.SIN.LV.SF.GFP | LIVER | 1 | 90179399  | + | NM_172505    | A730008H23Rik | - |
| DMM140  | Cdkn2a <sup>-/-</sup> _C57 | INS.SIN.LV.SF.GFP | LIVER | 1 | 91495653  | + | NM_001037136 | Agap1         | + |
| DMM128  | Cdkn2a <sup>-/-</sup> _C57 | INS.SIN.LV.SF.GFP | LIVER | 1 | 93840898  | + | NM_207225    | Hdac4         | - |
| DMM 142 | Cdkn2a <sup>-/-</sup> _C57 | INS.SIN.LV.SF.GFP | LIVER | 1 | 95014177  | - | NM_001110315 | Kif1a         | - |
| DMM141  | Cdkn2a <sup>-/-</sup> _C57 | INS.SIN.LV.SF.GFP | LIVER | 1 | 97224407  | - | NM_026321    | Fam174a       | + |
| DMM146  | Cdkn2a <sup>-/-</sup> _C57 | INS.SIN.LV.SF.GFP | LIVER | 1 | 97259869  | + | NM_026321    | Fam174a       | + |
| DMM140  | Cdkn2a <sup>-/-</sup> _C57 | INS.SIN.LV.SF.GFP | LIVER | 1 | 97270903  | - | NM_026321    | Fam174a       | + |
| DMM141  | Cdkn2a <sup>-/-</sup> _C57 | INS.SIN.LV.SF.GFP | LIVER | 1 | 97323649  | - | NM_026321    | Fam174a       | + |
| DMM146  | Cdkn2a <sup>-/-</sup> _C57 | INS.SIN.LV.SF.GFP | LIVER | 1 | 97330649  | + | NM_026321    | Fam174a       | + |
| DMM141  | Cdkn2a <sup>-/-</sup> _C57 | INS.SIN.LV.SF.GFP | LIVER | 1 | 97340411  | + | NM_026321    | Fam174a       | + |
| DMM130  | Cdkn2a <sup>-/-</sup> _C57 | INS.SIN.LV.SF.GFP | LIVER | 1 | 97489857  | + | NM_009183    | St8sia4       | - |
| DMM140  | Cdkn2a <sup>-/-</sup> _C57 | INS.SIN.LV.SF.GFP | LIVER | 1 | 99543199  | + | NM_133825    | D1ErtD622e    | - |
| DMM140  | Cdkn2a <sup>-/-</sup> _C57 | INS.SIN.LV.SF.GFP | LIVER | 1 | 99620791  | + | NM_173760    | Hisppd1       | - |
| DMM 134 | Cdkn2a <sup>-/-</sup> _C57 | INS.SIN.LV.SF.GFP | LIVER | 1 | 99642373  | + | NM_173760    | Hisppd1       | - |
| DMM140  | Cdkn2a <sup>-/-</sup> _C57 | INS.SIN.LV.SF.GFP | LIVER | 1 | 99649038  | - | NM_173760    | Hisppd1       | - |
| DMM128  | Cdkn2a <sup>-/-</sup> _C57 | INS.SIN.LV.SF.GFP | LIVER | 1 | 99775854  | + | NM_013626    | Pam           | - |
| DMM141  | Cdkn2a <sup>-/-</sup> _C57 | INS.SIN.LV.SF.GFP | LIVER | 1 | 100456360 | - | NM_013626    | Pam           | - |
| DMM141  | Cdkn2a <sup>-/-</sup> _C57 | INS.SIN.LV.SF.GFP | LIVER | 1 | 102115442 | + | NM_172851    | Cntnap5b      | + |
| DMM131  | Cdkn2a <sup>-/-</sup> _C57 | INS.SIN.LV.SF.GFP | LIVER | 1 | 102599980 | - | NM_172851    | Cntnap5b      | + |
| DMM141  | Cdkn2a <sup>-/-</sup> _C57 | INS.SIN.LV.SF.GFP | LIVER | 1 | 103506774 | + | NM_172851    | Cntnap5b      | + |
| DMM141  | Cdkn2a <sup>-/-</sup> _C57 | INS.SIN.LV.SF.GFP | LIVER | 1 | 107456671 | - | NM_013784    | Pign          | - |
| DMM140  | Cdkn2a <sup>-/-</sup> _C57 | INS.SIN.LV.SF.GFP | LIVER | 1 | 107617725 | - | NM_029349    | 2310035C23Rik | + |
| DMM 128 | Cdkn2a <sup>-/-</sup> _C57 | INS.SIN.LV.SF.GFP | LIVER | 1 | 108673824 | + | NM_009190    | Vps4b         | - |
| DMM141  | Cdkn2a <sup>-/-</sup> _C57 | INS.SIN.LV.SF.GFP | LIVER | 1 | 108683440 | - | NM_009190    | Vps4b         | - |



|         |                            |                   |       |   |           |   |              |               |   |
|---------|----------------------------|-------------------|-------|---|-----------|---|--------------|---------------|---|
| DMM140  | Cdkn2a <sup>-/-</sup> _C57 | INS.SIN.LV.SF.GFP | LIVER | 1 | 108684849 | + | NM_009190    | Vps4b         | - |
| DMM139  | Cdkn2a <sup>-/-</sup> _C57 | INS.SIN.LV.SF.GFP | LIVER | 1 | 109413116 | - | NM_011111    | Serpib2       | + |
| DMM140  | Cdkn2a <sup>-/-</sup> _C57 | INS.SIN.LV.SF.GFP | LIVER | 1 | 116495254 | + | NM_001077425 | Cntnap5a      | + |
| DMM134  | Cdkn2a <sup>-/-</sup> _C57 | INS.SIN.LV.SF.GFP | LIVER | 1 | 120232190 | + | NM_026472    | Mki67ip       | + |
| DMM142  | Cdkn2a <sup>-/-</sup> _C57 | INS.SIN.LV.SF.GFP | LIVER | 1 | 122027322 | - | NM_028439    | 3110009E18Rik | + |
| DMM134  | Cdkn2a <sup>-/-</sup> _C57 | INS.SIN.LV.SF.GFP | LIVER | 1 | 129111669 | - | NM_145128    | Mgat5         | + |
| DMM140  | Cdkn2a <sup>-/-</sup> _C57 | INS.SIN.LV.SF.GFP | LIVER | 1 | 129321121 | + | NM_145128    | Mgat5         | + |
| DMM133  | Cdkn2a <sup>-/-</sup> _C57 | INS.SIN.LV.SF.GFP | LIVER | 1 | 129799352 | - | NM_178690    | Rab3gap1      | + |
| DMM141  | Cdkn2a <sup>-/-</sup> _C57 | INS.SIN.LV.SF.GFP | LIVER | 1 | 129957825 | + | NM_027678    | Zranb3        | - |
| DMM140  | Cdkn2a <sup>-/-</sup> _C57 | INS.SIN.LV.SF.GFP | LIVER | 1 | 130080555 | + | NM_181750    | R3hdm1        | + |
| DMM141  | Cdkn2a <sup>-/-</sup> _C57 | INS.SIN.LV.SF.GFP | LIVER | 1 | 130287379 | + | NM_177445    | Dars          | - |
| DMM 141 | Cdkn2a <sup>-/-</sup> _C57 | INS.SIN.LV.SF.GFP | LIVER | 1 | 133558343 | + | NM_007799    | Ctse          | + |
| DMM140  | Cdkn2a <sup>-/-</sup> _C57 | INS.SIN.LV.SF.GFP | LIVER | 1 | 138324229 | + | NM_026500    | Ddx59         | + |
| DMM 142 | Cdkn2a <sup>-/-</sup> _C57 | INS.SIN.LV.SF.GFP | LIVER | 1 | 138391809 | + | NM_001081258 | Kif14         | + |
| DMM 141 | Cdkn2a <sup>-/-</sup> _C57 | INS.SIN.LV.SF.GFP | LIVER | 1 | 139649271 | - | NM_001111316 | Ptprc         | - |
| DMM140  | Cdkn2a <sup>-/-</sup> _C57 | INS.SIN.LV.SF.GFP | LIVER | 1 | 139668926 | + | NM_001111316 | Ptprc         | - |
| DMM 128 | Cdkn2a <sup>-/-</sup> _C57 | INS.SIN.LV.SF.GFP | LIVER | 1 | 139823543 | - | NM_001111316 | Ptprc         | - |
| DMM146  | Cdkn2a <sup>-/-</sup> _C57 | INS.SIN.LV.SF.GFP | LIVER | 1 | 139989274 | - | NM_001111316 | Ptprc         | - |
| DMM128  | Cdkn2a <sup>-/-</sup> _C57 | INS.SIN.LV.SF.GFP | LIVER | 1 | 140926800 | + | NM_181347    | Dennd1b       | + |
| DMM 142 | Cdkn2a <sup>-/-</sup> _C57 | INS.SIN.LV.SF.GFP | LIVER | 1 | 140928516 | - | NM_181347    | Dennd1b       | + |
| DMM141  | Cdkn2a <sup>-/-</sup> _C57 | INS.SIN.LV.SF.GFP | LIVER | 1 | 141334364 | - | NM_172643    | Zbtb41        | + |
| DMM140  | Cdkn2a <sup>-/-</sup> _C57 | INS.SIN.LV.SF.GFP | LIVER | 1 | 141998775 | + | NM_009888    | Cfh           | - |
| DMM 128 | Cdkn2a <sup>-/-</sup> _C57 | INS.SIN.LV.SF.GFP | LIVER | 1 | 142256047 | + | NM_001081027 | Kcnt2         | + |
| DMM140  | Cdkn2a <sup>-/-</sup> _C57 | INS.SIN.LV.SF.GFP | LIVER | 1 | 145632289 | - | NM_001159866 | Uchl5         | + |
| DMM141  | Cdkn2a <sup>-/-</sup> _C57 | INS.SIN.LV.SF.GFP | LIVER | 1 | 145823469 | - | NM_009061    | Rgs2          | - |
| DMM140  | Cdkn2a <sup>-/-</sup> _C57 | INS.SIN.LV.SF.GFP | LIVER | 1 | 146144282 | - | NM_015811    | Rgs1          | - |
| DMM141  | Cdkn2a <sup>-/-</sup> _C57 | INS.SIN.LV.SF.GFP | LIVER | 1 | 146152527 | - | NM_015811    | Rgs1          | - |
| DMM140  | Cdkn2a <sup>-/-</sup> _C57 | INS.SIN.LV.SF.GFP | LIVER | 1 | 146164397 | - | NM_015811    | Rgs1          | - |
| DMM 128 | Cdkn2a <sup>-/-</sup> _C57 | INS.SIN.LV.SF.GFP | LIVER | 1 | 148095303 | - | NM_153539    | Fam5c         | + |
| DMM140  | Cdkn2a <sup>-/-</sup> _C57 | INS.SIN.LV.SF.GFP | LIVER | 1 | 148813549 | + | NM_001145807 | Fam5c         | + |
| DMM146  | Cdkn2a <sup>-/-</sup> _C57 | INS.SIN.LV.SF.GFP | LIVER | 1 | 150660872 | + | NM_008869    | Pla2g4a       | - |
| DMM 139 | Cdkn2a <sup>-/-</sup> _C57 | INS.SIN.LV.SF.GFP | LIVER | 1 | 151738191 | - | NM_008869    | Pla2g4a       | - |
| DMM146  | Cdkn2a <sup>-/-</sup> _C57 | INS.SIN.LV.SF.GFP | LIVER | 1 | 151806745 | - | NM_008869    | Pla2g4a       | - |
| DMM134  | Cdkn2a <sup>-/-</sup> _C57 | INS.SIN.LV.SF.GFP | LIVER | 1 | 152248991 | - | NM_133780    | Tpr           | + |
| DMM128  | Cdkn2a <sup>-/-</sup> _C57 | INS.SIN.LV.SF.GFP | LIVER | 1 | 155313503 | - | NM_007842    | Dhx9          | - |

|         |                            |                   |       |   |           |   |              |          |   |
|---------|----------------------------|-------------------|-------|---|-----------|---|--------------|----------|---|
| DMM 141 | Cdkn2a <sup>-/-</sup> _C57 | INS.SIN.LV.SF.GFP | LIVER | 1 | 157747116 | + | NM_001024945 | Qsox1    | - |
| DMM 135 | Cdkn2a <sup>-/-</sup> _C57 | INS.SIN.LV.SF.GFP | LIVER | 1 | 160974922 | - | NM_001085376 | Pappa2   | - |
| DMM141  | Cdkn2a <sup>-/-</sup> _C57 | INS.SIN.LV.SF.GFP | LIVER | 1 | 161205735 | + | NM_011931    | Rfwd2    | + |
| DMM140  | Cdkn2a <sup>-/-</sup> _C57 | INS.SIN.LV.SF.GFP | LIVER | 1 | 162187115 | - | NM_013862    | Rabgap11 | - |
| DMM140  | Cdkn2a <sup>-/-</sup> _C57 | INS.SIN.LV.SF.GFP | LIVER | 1 | 162665461 | + | NM_013862    | Rabgap11 | - |
| DMM128  | Cdkn2a <sup>-/-</sup> _C57 | INS.SIN.LV.SF.GFP | LIVER | 1 | 162863956 | - | NM_001024952 | Re3h1    | + |
| DMM128  | Cdkn2a <sup>-/-</sup> _C57 | INS.SIN.LV.SF.GFP | LIVER | 1 | 163439291 | + | NM_183391    | Tnfsf18  | + |
| DMM140  | Cdkn2a <sup>-/-</sup> _C57 | INS.SIN.LV.SF.GFP | LIVER | 1 | 165894063 | + | NM_201364    | BC055324 | - |
| DMM140  | Cdkn2a <sup>-/-</sup> _C57 | INS.SIN.LV.SF.GFP | LIVER | 1 | 165900787 | + | NM_201364    | BC055324 | - |
| DMM140  | Cdkn2a <sup>-/-</sup> _C57 | INS.SIN.LV.SF.GFP | LIVER | 1 | 166493940 | + | NM_009721    | Atp1b1   | - |
| DMM 142 | Cdkn2a <sup>-/-</sup> _C57 | INS.SIN.LV.SF.GFP | LIVER | 1 | 167832613 | - | NM_011137    | Pou2f1   | - |
| DMM140  | Cdkn2a <sup>-/-</sup> _C57 | INS.SIN.LV.SF.GFP | LIVER | 1 | 168318251 | - | NM_030245    | Tada11   | + |
| DMM140  | Cdkn2a <sup>-/-</sup> _C57 | INS.SIN.LV.SF.GFP | LIVER | 1 | 175564773 | + | NM_175026    | Pyhin1   | + |
| DMM146  | Cdkn2a <sup>-/-</sup> _C57 | INS.SIN.LV.SF.GFP | LIVER | 1 | 175805003 | + | NM_001033450 | Mnda     | - |
| DMM140  | Cdkn2a <sup>-/-</sup> _C57 | INS.SIN.LV.SF.GFP | LIVER | 1 | 175955926 | + | NM_172648    | Ifi205   | - |
| DMM141  | Cdkn2a <sup>-/-</sup> _C57 | INS.SIN.LV.SF.GFP | LIVER | 1 | 176150262 | + | NM_011465    | Spna1    | + |
| DMM128  | Cdkn2a <sup>-/-</sup> _C57 | INS.SIN.LV.SF.GFP | LIVER | 1 | 176292268 | - | NM_207137    | Olf417   | + |
| DMM141  | Cdkn2a <sup>-/-</sup> _C57 | INS.SIN.LV.SF.GFP | LIVER | 1 | 177553883 | - | NM_010209    | Fhl1     | - |
| DMM130  | Cdkn2a <sup>-/-</sup> _C57 | INS.SIN.LV.SF.GFP | LIVER | 1 | 177832590 | - | NM_012012    | Exo1     | + |
| DMM141  | Cdkn2a <sup>-/-</sup> _C57 | INS.SIN.LV.SF.GFP | LIVER | 1 | 181331347 | + | NM_027188    | Smyd3    | - |
| DMM128  | Cdkn2a <sup>-/-</sup> _C57 | INS.SIN.LV.SF.GFP | LIVER | 1 | 185688145 | - | NM_022019    | Dusp10   | + |
| DMM134  | Cdkn2a <sup>-/-</sup> _C57 | INS.SIN.LV.SF.GFP | LIVER | 1 | 187177568 | - | NM_011794    | Bpnt1    | + |
| DMM146  | Cdkn2a <sup>-/-</sup> _C57 | INS.SIN.LV.SF.GFP | LIVER | 1 | 188400727 | + | NM_009367    | Tgfb2    | - |
| DMM133  | Cdkn2a <sup>-/-</sup> _C57 | INS.SIN.LV.SF.GFP | LIVER | 1 | 188576553 | + | NM_026041    | Rrp15    | - |
| DMM133  | Cdkn2a <sup>-/-</sup> _C57 | INS.SIN.LV.SF.GFP | LIVER | 1 | 190814493 | - | NM_172650    | Kctd3    | - |
| DMM141  | Cdkn2a <sup>-/-</sup> _C57 | INS.SIN.LV.SF.GFP | LIVER | 1 | 191501505 | - | NM_001081363 | Cenpf    | - |
| DMM141  | Cdkn2a <sup>-/-</sup> _C57 | INS.SIN.LV.SF.GFP | LIVER | 1 | 194594527 | - | NM_144881    | Hhat     | - |
| DMM140  | Cdkn2a <sup>-/-</sup> _C57 | INS.SIN.LV.SF.GFP | LIVER | 1 | 194802756 | + | NM_181546    | Syt14    | - |
| DMM141  | Cdkn2a <sup>-/-</sup> _C57 | INS.SIN.LV.SF.GFP | LIVER | 1 | 194828531 | - | NM_181546    | Syt14    | - |
| DMM128  | Cdkn2a <sup>-/-</sup> _C57 | INS.SIN.LV.SF.GFP | LIVER | 1 | 194972361 | - | NM_016851    | Irf6     | + |
| DMM141  | Cdkn2a <sup>-/-</sup> _C57 | INS.SIN.LV.SF.GFP | LIVER | 1 | 195667842 | - | NM_144817    | Camk1g   | - |
| DMM140  | Cdkn2a <sup>-/-</sup> _C57 | INS.SIN.LV.SF.GFP | LIVER | 2 | 3240980   | + | NM_008708    | Nmt2     | + |
| DMM 128 | Cdkn2a <sup>-/-</sup> _C57 | INS.SIN.LV.SF.GFP | LIVER | 2 | 3272683   | + | NM_145921    | Olah     | - |
| DMM128  | Cdkn2a <sup>-/-</sup> _C57 | INS.SIN.LV.SF.GFP | LIVER | 2 | 4557460   | + | NM_026045    | Prpf18   | - |
| DMM 142 | Cdkn2a <sup>-/-</sup> _C57 | INS.SIN.LV.SF.GFP | LIVER | 2 | 5267352   | + | NM_177343    | Camk1d   | - |

|         |                            |                   |       |   |          |   |              |               |   |
|---------|----------------------------|-------------------|-------|---|----------|---|--------------|---------------|---|
| DMM139  | Cdkn2a <sup>-/-</sup> _C57 | INS.SIN.LV.SF.GFP | LIVER | 2 | 5673906  | + | NM_177343    | Camk1d        | - |
| DMM134  | Cdkn2a <sup>-/-</sup> _C57 | INS.SIN.LV.SF.GFP | LIVER | 2 | 9915695  | + | NM_027748    | Taf3          | - |
| DMM134  | Cdkn2a <sup>-/-</sup> _C57 | INS.SIN.LV.SF.GFP | LIVER | 2 | 9944993  | + | NM_027748    | Taf3          | - |
| DMM 142 | Cdkn2a <sup>-/-</sup> _C57 | INS.SIN.LV.SF.GFP | LIVER | 2 | 11993439 | + | NM_001001309 | Itga8         | - |
| DMM 141 | Cdkn2a <sup>-/-</sup> _C57 | INS.SIN.LV.SF.GFP | LIVER | 2 | 12281892 | + | NM_024185    | 2310047O13Rik | - |
| DMM140  | Cdkn2a <sup>-/-</sup> _C57 | INS.SIN.LV.SF.GFP | LIVER | 2 | 12329973 | + | NM_024185    | 2310047O13Rik | - |
| DMM140  | Cdkn2a <sup>-/-</sup> _C57 | INS.SIN.LV.SF.GFP | LIVER | 2 | 12330271 | - | NM_024185    | 2310047O13Rik | - |
| DMM 134 | Cdkn2a <sup>-/-</sup> _C57 | INS.SIN.LV.SF.GFP | LIVER | 2 | 12355334 | + | NM_024185    | 2310047O13Rik | - |
| DMM140  | Cdkn2a <sup>-/-</sup> _C57 | INS.SIN.LV.SF.GFP | LIVER | 2 | 13453875 | + | NM_010067    | Trdmt1        | - |
| DMM140  | Cdkn2a <sup>-/-</sup> _C57 | INS.SIN.LV.SF.GFP | LIVER | 2 | 14169700 | - | NM_008625    | Mrc1          | + |
| DMM141  | Cdkn2a <sup>-/-</sup> _C57 | INS.SIN.LV.SF.GFP | LIVER | 2 | 14321443 | + | NM_001012305 | Slc39a12      | + |
| DMM140  | Cdkn2a <sup>-/-</sup> _C57 | INS.SIN.LV.SF.GFP | LIVER | 2 | 16136039 | - | NM_026162    | Plxdc2        | + |
| DMM 141 | Cdkn2a <sup>-/-</sup> _C57 | INS.SIN.LV.SF.GFP | LIVER | 2 | 16657055 | - | NM_026162    | Plxdc2        | + |
| DMM135  | Cdkn2a <sup>-/-</sup> _C57 | INS.SIN.LV.SF.GFP | LIVER | 2 | 18082474 | - | NM_010804    | Mlt10         | + |
| DMM141  | Cdkn2a <sup>-/-</sup> _C57 | INS.SIN.LV.SF.GFP | LIVER | 2 | 21436747 | + | NM_001004761 | Gpr158        | + |
| DMM139  | Cdkn2a <sup>-/-</sup> _C57 | INS.SIN.LV.SF.GFP | LIVER | 2 | 22722565 | - | NM_019456    | Apbb1ip       | + |
| DMM141  | Cdkn2a <sup>-/-</sup> _C57 | INS.SIN.LV.SF.GFP | LIVER | 2 | 23363396 | + | NM_029773    | Spopl         | - |
| DMM134  | Cdkn2a <sup>-/-</sup> _C57 | INS.SIN.LV.SF.GFP | LIVER | 2 | 26234235 | - | NM_172339    | Snape4        | - |
| DMM 135 | Cdkn2a <sup>-/-</sup> _C57 | INS.SIN.LV.SF.GFP | LIVER | 2 | 35999854 | + | NM_026422    | Mrrf          | + |
| DMM141  | Cdkn2a <sup>-/-</sup> _C57 | INS.SIN.LV.SF.GFP | LIVER | 2 | 37274265 | - | NM_001100591 | Rc3h2         | - |
| DMM140  | Cdkn2a <sup>-/-</sup> _C57 | INS.SIN.LV.SF.GFP | LIVER | 2 | 37355985 | + | NM_001033960 | Rabgap1       | + |
| DMM141  | Cdkn2a <sup>-/-</sup> _C57 | INS.SIN.LV.SF.GFP | LIVER | 2 | 38078282 | + | NM_146122    | Dennd1a       | - |
| DMM141  | Cdkn2a <sup>-/-</sup> _C57 | INS.SIN.LV.SF.GFP | LIVER | 2 | 43437069 | - | NM_027552    | Kynu          | + |
| DMM140  | Cdkn2a <sup>-/-</sup> _C57 | INS.SIN.LV.SF.GFP | LIVER | 2 | 43631830 | + | NM_001025377 | Arhgap15      | + |
| DMM134  | Cdkn2a <sup>-/-</sup> _C57 | INS.SIN.LV.SF.GFP | LIVER | 2 | 43673639 | - | NM_001025377 | Arhgap15      | + |
| DMM140  | Cdkn2a <sup>-/-</sup> _C57 | INS.SIN.LV.SF.GFP | LIVER | 2 | 43772602 | - | NM_153820    | Arhgap15      | + |
| DMM 139 | Cdkn2a <sup>-/-</sup> _C57 | INS.SIN.LV.SF.GFP | LIVER | 2 | 45429963 | + | NM_015753    | Zeb2          | - |
| DMM140  | Cdkn2a <sup>-/-</sup> _C57 | INS.SIN.LV.SF.GFP | LIVER | 2 | 45695900 | + | NM_015753    | Zeb2          | - |
| DMM141  | Cdkn2a <sup>-/-</sup> _C57 | INS.SIN.LV.SF.GFP | LIVER | 2 | 48205120 | - | NM_007396    | Acvr2a        | + |
| DMM 128 | Cdkn2a <sup>-/-</sup> _C57 | INS.SIN.LV.SF.GFP | LIVER | 2 | 48317853 | + | NM_007396    | Acvr2a        | + |
| DMM141  | Cdkn2a <sup>-/-</sup> _C57 | INS.SIN.LV.SF.GFP | LIVER | 2 | 48573315 | - | NM_007396    | Acvr2a        | + |
| DMM134  | Cdkn2a <sup>-/-</sup> _C57 | INS.SIN.LV.SF.GFP | LIVER | 2 | 48683002 | + | NM_007396    | Acvr2a        | + |
| DMM134  | Cdkn2a <sup>-/-</sup> _C57 | INS.SIN.LV.SF.GFP | LIVER | 2 | 48796152 | + | NM_011958    | Orc4l         | - |
| DMM141  | Cdkn2a <sup>-/-</sup> _C57 | INS.SIN.LV.SF.GFP | LIVER | 2 | 49000776 | + | NM_029924    | Mbd5          | + |
| DMM140  | Cdkn2a <sup>-/-</sup> _C57 | INS.SIN.LV.SF.GFP | LIVER | 2 | 49153008 | - | NM_029924    | Mbd5          | + |

|         |                            |                   |       |   |          |   |              |         |   |
|---------|----------------------------|-------------------|-------|---|----------|---|--------------|---------|---|
| DMM141  | Cdkn2a <sup>-/-</sup> _C57 | INS.SIN.LV.SF.GFP | LIVER | 2 | 49343999 | + | NM_172663    | Epc2    | + |
| DMM 133 | Cdkn2a <sup>-/-</sup> _C57 | INS.SIN.LV.SF.GFP | LIVER | 2 | 50141475 | - | NM_133839    | Mmadhc  | - |
| DMM 134 | Cdkn2a <sup>-/-</sup> _C57 | INS.SIN.LV.SF.GFP | LIVER | 2 | 52417200 | + | NM_001037099 | Cacnb4  | - |
| DMM141  | Cdkn2a <sup>-/-</sup> _C57 | INS.SIN.LV.SF.GFP | LIVER | 2 | 53014926 | - | NM_018785    | Prpf40a | - |
| DMM140  | Cdkn2a <sup>-/-</sup> _C57 | INS.SIN.LV.SF.GFP | LIVER | 2 | 53059020 | - | NM_022989    | Arl6ip6 | + |
| DMM141  | Cdkn2a <sup>-/-</sup> _C57 | INS.SIN.LV.SF.GFP | LIVER | 2 | 57173029 | + | NM_001145820 | Gpd2    | + |
| DMM140  | Cdkn2a <sup>-/-</sup> _C57 | INS.SIN.LV.SF.GFP | LIVER | 2 | 57996580 | + | NM_139200    | Cytip   | - |
| DMM140  | Cdkn2a <sup>-/-</sup> _C57 | INS.SIN.LV.SF.GFP | LIVER | 2 | 58001652 | + | NM_139200    | Cytip   | - |
| DMM140  | Cdkn2a <sup>-/-</sup> _C57 | INS.SIN.LV.SF.GFP | LIVER | 2 | 60056422 | - | NM_020575    | 7-Mar   | + |
| DMM 139 | Cdkn2a <sup>-/-</sup> _C57 | INS.SIN.LV.SF.GFP | LIVER | 2 | 61435561 | - | NM_011529    | Tank    | + |
| DMM 141 | Cdkn2a <sup>-/-</sup> _C57 | INS.SIN.LV.SF.GFP | LIVER | 2 | 61472767 | - | NM_011529    | Tank    | + |
| DMM146  | Cdkn2a <sup>-/-</sup> _C57 | INS.SIN.LV.SF.GFP | LIVER | 2 | 61615912 | - | NM_021526    | Psm14   | + |
| DMM140  | Cdkn2a <sup>-/-</sup> _C57 | INS.SIN.LV.SF.GFP | LIVER | 2 | 61626191 | - | NM_021526    | Psm14   | + |
| DMM140  | Cdkn2a <sup>-/-</sup> _C57 | INS.SIN.LV.SF.GFP | LIVER | 2 | 68783291 | + | NM_172856    | Lass6   | + |
| DMM140  | Cdkn2a <sup>-/-</sup> _C57 | INS.SIN.LV.SF.GFP | LIVER | 2 | 71244436 | - | NM_026115    | Hat1    | + |
| DMM 141 | Cdkn2a <sup>-/-</sup> _C57 | INS.SIN.LV.SF.GFP | LIVER | 2 | 75645464 | + | NM_172666    | Agps    | + |
| DMM140  | Cdkn2a <sup>-/-</sup> _C57 | INS.SIN.LV.SF.GFP | LIVER | 2 | 75745114 | - | NM_172666    | Agps    | + |
| DMM140  | Cdkn2a <sup>-/-</sup> _C57 | INS.SIN.LV.SF.GFP | LIVER | 2 | 76509331 | + | NM_010222    | Fkbp7   | - |
| DMM140  | Cdkn2a <sup>-/-</sup> _C57 | INS.SIN.LV.SF.GFP | LIVER | 2 | 76534103 | - | NM_031256    | Plekha3 | + |
| DMM133  | Cdkn2a <sup>-/-</sup> _C57 | INS.SIN.LV.SF.GFP | LIVER | 2 | 78714981 | - | NM_009454    | Ube2e3  | + |
| DMM 139 | Cdkn2a <sup>-/-</sup> _C57 | INS.SIN.LV.SF.GFP | LIVER | 2 | 79143434 | + | NM_010576    | Itga4   | + |
| DMM134  | Cdkn2a <sup>-/-</sup> _C57 | INS.SIN.LV.SF.GFP | LIVER | 2 | 79574456 | + | NM_172420    | Ppp1r1c | + |
| DMM141  | Cdkn2a <sup>-/-</sup> _C57 | INS.SIN.LV.SF.GFP | LIVER | 2 | 79924177 | + | NM_016744    | Pde1a   | - |
| DMM 142 | Cdkn2a <sup>-/-</sup> _C57 | INS.SIN.LV.SF.GFP | LIVER | 2 | 80160609 | - | NM_024181    | Dnajc10 | + |
| DMM 134 | Cdkn2a <sup>-/-</sup> _C57 | INS.SIN.LV.SF.GFP | LIVER | 2 | 80483745 | - | NM_027091    | Nup35   | + |
| DMM140  | Cdkn2a <sup>-/-</sup> _C57 | INS.SIN.LV.SF.GFP | LIVER | 2 | 83635585 | + | NM_008402    | Itgav   | + |
| DMM146  | Cdkn2a <sup>-/-</sup> _C57 | INS.SIN.LV.SF.GFP | LIVER | 2 | 84089521 | + | NM_018782    | Calcr1  | - |
| DMM133  | Cdkn2a <sup>-/-</sup> _C57 | INS.SIN.LV.SF.GFP | LIVER | 2 | 84118970 | + | NM_018782    | Calcr1  | - |
| DMM 133 | Cdkn2a <sup>-/-</sup> _C57 | INS.SIN.LV.SF.GFP | LIVER | 2 | 84119073 | - | NM_018782    | Calcr1  | - |
| DMM141  | Cdkn2a <sup>-/-</sup> _C57 | INS.SIN.LV.SF.GFP | LIVER | 2 | 84183058 | + | NM_018782    | Calcr1  | - |
| DMM128  | Cdkn2a <sup>-/-</sup> _C57 | INS.SIN.LV.SF.GFP | LIVER | 2 | 84205726 | + | NM_018782    | Calcr1  | - |
| DMM146  | Cdkn2a <sup>-/-</sup> _C57 | INS.SIN.LV.SF.GFP | LIVER | 2 | 84218908 | - | NM_018782    | Calcr1  | - |
| DMM139  | Cdkn2a <sup>-/-</sup> _C57 | INS.SIN.LV.SF.GFP | LIVER | 2 | 84779063 | + | NM_021398    | Slc43a3 | + |
| DMM128  | Cdkn2a <sup>-/-</sup> _C57 | INS.SIN.LV.SF.GFP | LIVER | 2 | 90825230 | - | NM_017368    | Cugbp1  | + |
| DMM134  | Cdkn2a <sup>-/-</sup> _C57 | INS.SIN.LV.SF.GFP | LIVER | 2 | 91072296 | + | NM_028119    | Ddb2    | - |

|         |                            |                   |       |   |           |   |              |               |   |
|---------|----------------------------|-------------------|-------|---|-----------|---|--------------|---------------|---|
| DMM 141 | Cdkn2a <sup>-/-</sup> _C57 | INS.SIN.LV.SF.GFP | LIVER | 2 | 91406150  | + | NM_029437    | Ckap5         | + |
| DMM140  | Cdkn2a <sup>-/-</sup> _C57 | INS.SIN.LV.SF.GFP | LIVER | 2 | 92844175  | - | NM_030725    | Syt13         | + |
| DMM 139 | Cdkn2a <sup>-/-</sup> _C57 | INS.SIN.LV.SF.GFP | LIVER | 2 | 93905451  | - | NM_019657    | Hsd17b12      | - |
| DMM 139 | Cdkn2a <sup>-/-</sup> _C57 | INS.SIN.LV.SF.GFP | LIVER | 2 | 98506818  | - | NM_178725    | Lrrc4c        | + |
| DMM 142 | Cdkn2a <sup>-/-</sup> _C57 | INS.SIN.LV.SF.GFP | LIVER | 2 | 102210818 | - | NM_020267    | Trim44        | - |
| DMM140  | Cdkn2a <sup>-/-</sup> _C57 | INS.SIN.LV.SF.GFP | LIVER | 2 | 104304725 | + | NM_001145824 | Hipk3         | - |
| DMM141  | Cdkn2a <sup>-/-</sup> _C57 | INS.SIN.LV.SF.GFP | LIVER | 2 | 105653807 | - | NM_023876    | Elp4          | - |
| DMM140  | Cdkn2a <sup>-/-</sup> _C57 | INS.SIN.LV.SF.GFP | LIVER | 2 | 109144628 | - | NM_139303    | Kif18a        | + |
| DMM141  | Cdkn2a <sup>-/-</sup> _C57 | INS.SIN.LV.SF.GFP | LIVER | 2 | 109149136 | - | NM_139303    | Kif18a        | + |
| DMM141  | Cdkn2a <sup>-/-</sup> _C57 | INS.SIN.LV.SF.GFP | LIVER | 2 | 109876015 | - | NM_026613    | Ccdc34        | + |
| DMM141  | Cdkn2a <sup>-/-</sup> _C57 | INS.SIN.LV.SF.GFP | LIVER | 2 | 112119102 | - | NM_133649    | Slc12a6       | + |
| DMM141  | Cdkn2a <sup>-/-</sup> _C57 | INS.SIN.LV.SF.GFP | LIVER | 2 | 112127903 | + | NM_133648    | Slc12a6       | + |
| DMM141  | Cdkn2a <sup>-/-</sup> _C57 | INS.SIN.LV.SF.GFP | LIVER | 2 | 112376266 | - | NM_028844    | Aven          | + |
| DMM141  | Cdkn2a <sup>-/-</sup> _C57 | INS.SIN.LV.SF.GFP | LIVER | 2 | 113296105 | - | NM_001043322 | Fmn1          | + |
| DMM146  | Cdkn2a <sup>-/-</sup> _C57 | INS.SIN.LV.SF.GFP | LIVER | 2 | 113436886 | - | NM_001043322 | Fmn1          | + |
| DMM146  | Cdkn2a <sup>-/-</sup> _C57 | INS.SIN.LV.SF.GFP | LIVER | 2 | 113939887 | - | NM_009702    | Aqr           | - |
| DMM140  | Cdkn2a <sup>-/-</sup> _C57 | INS.SIN.LV.SF.GFP | LIVER | 2 | 116967374 | + | NM_033524    | Spred1        | + |
| DMM139  | Cdkn2a <sup>-/-</sup> _C57 | INS.SIN.LV.SF.GFP | LIVER | 2 | 121810046 | + | NM_212450    | Ctdsp12       | + |
| DMM140  | Cdkn2a <sup>-/-</sup> _C57 | INS.SIN.LV.SF.GFP | LIVER | 2 | 121837838 | - | NM_212450    | Ctdsp12       | + |
| DMM139  | Cdkn2a <sup>-/-</sup> _C57 | INS.SIN.LV.SF.GFP | LIVER | 2 | 121873564 | + | NM_144545    | Eif3j         | + |
| DMM 128 | Cdkn2a <sup>-/-</sup> _C57 | INS.SIN.LV.SF.GFP | LIVER | 2 | 124462488 | + | NM_172537    | Sema6d        | + |
| DMM134  | Cdkn2a <sup>-/-</sup> _C57 | INS.SIN.LV.SF.GFP | LIVER | 2 | 124941088 | + | NM_010852    | Myef2         | - |
| DMM141  | Cdkn2a <sup>-/-</sup> _C57 | INS.SIN.LV.SF.GFP | LIVER | 2 | 125674328 | - | NM_009939    | Cops2         | - |
| DMM 142 | Cdkn2a <sup>-/-</sup> _C57 | INS.SIN.LV.SF.GFP | LIVER | 2 | 126746023 | + | NM_023220    | 2010106G01Rik | - |
| DMM 149 | Cdkn2a <sup>-/-</sup> _C57 | INS.SIN.LV.SF.GFP | LIVER | 2 | 132484846 | + | NM_028637    | 1110034G24Rik | + |
| DMM141  | Cdkn2a <sup>-/-</sup> _C57 | INS.SIN.LV.SF.GFP | LIVER | 2 | 132686540 | + | NM_001024385 | Crls1         | + |
| DMM146  | Cdkn2a <sup>-/-</sup> _C57 | INS.SIN.LV.SF.GFP | LIVER | 2 | 133352875 | + | NM_007553    | Bmp2          | + |
| DMM141  | Cdkn2a <sup>-/-</sup> _C57 | INS.SIN.LV.SF.GFP | LIVER | 2 | 135326681 | + | NM_001145830 | Plcb1         | + |
| DMM128  | Cdkn2a <sup>-/-</sup> _C57 | INS.SIN.LV.SF.GFP | LIVER | 2 | 136729075 | - | NM_001038641 | 2210009G21Rik | + |
| DMM128  | Cdkn2a <sup>-/-</sup> _C57 | INS.SIN.LV.SF.GFP | LIVER | 2 | 137389141 | + | NM_013822    | Jag1          | - |
| DMM141  | Cdkn2a <sup>-/-</sup> _C57 | INS.SIN.LV.SF.GFP | LIVER | 2 | 139984495 | + | NM_001081090 | Esf1          | - |
| DMM 134 | Cdkn2a <sup>-/-</sup> _C57 | INS.SIN.LV.SF.GFP | LIVER | 2 | 141080444 | - | NM_001013802 | Macrod2       | + |
| DMM134  | Cdkn2a <sup>-/-</sup> _C57 | INS.SIN.LV.SF.GFP | LIVER | 2 | 141576860 | - | NM_001013802 | Macrod2       | + |
| DMM140  | Cdkn2a <sup>-/-</sup> _C57 | INS.SIN.LV.SF.GFP | LIVER | 2 | 142479425 | + | NM_001081133 | Kif16b        | - |
| DMM141  | Cdkn2a <sup>-/-</sup> _C57 | INS.SIN.LV.SF.GFP | LIVER | 2 | 146891992 | + | NM_011917    | Xrn2          | + |

|         |                            |                   |       |   |           |   |              |               |   |
|---------|----------------------------|-------------------|-------|---|-----------|---|--------------|---------------|---|
| DMM141  | Cdkn2a <sup>-/-</sup> _C57 | INS.SIN.LV.SF.GFP | LIVER | 2 | 146900845 | + | NM_011917    | Xrn2          | + |
| DMM 133 | Cdkn2a <sup>-/-</sup> _C57 | INS.SIN.LV.SF.GFP | LIVER | 2 | 149940240 | + | NM_023266    | Zfp120        | - |
| DMM 141 | Cdkn2a <sup>-/-</sup> _C57 | INS.SIN.LV.SF.GFP | LIVER | 2 | 150704525 | + | NM_024465    | Abhd12        | - |
| DMM 140 | Cdkn2a <sup>-/-</sup> _C57 | INS.SIN.LV.SF.GFP | LIVER | 2 | 151327616 | - | NM_198326    | Nsf1c         | + |
| DMM139  | Cdkn2a <sup>-/-</sup> _C57 | INS.SIN.LV.SF.GFP | LIVER | 2 | 155241713 | - | NM_019825    | Ncoa6         | - |
| DMM 149 | Cdkn2a <sup>-/-</sup> _C57 | INS.SIN.LV.SF.GFP | LIVER | 2 | 155511735 | - | NM_019828    | Trpc4ap       | - |
| DMM146  | Cdkn2a <sup>-/-</sup> _C57 | INS.SIN.LV.SF.GFP | LIVER | 2 | 157840714 | - | NM_029282    | 2610036D13Rik | - |
| DMM128  | Cdkn2a <sup>-/-</sup> _C57 | INS.SIN.LV.SF.GFP | LIVER | 2 | 160523818 | - | NM_009408    | Top1          | + |
| DMM134  | Cdkn2a <sup>-/-</sup> _C57 | INS.SIN.LV.SF.GFP | LIVER | 2 | 160795536 | - | NM_173368    | Chd6          | - |
| DMM 142 | Cdkn2a <sup>-/-</sup> _C57 | INS.SIN.LV.SF.GFP | LIVER | 3 | 7540284   | - | NM_173181    | Fam164a       | + |
| DMM146  | Cdkn2a <sup>-/-</sup> _C57 | INS.SIN.LV.SF.GFP | LIVER | 3 | 8606616   | + | NM_025285    | Stmn2         | + |
| DMM141  | Cdkn2a <sup>-/-</sup> _C57 | INS.SIN.LV.SF.GFP | LIVER | 3 | 10422434  | - | NM_001127191 | Snx16         | - |
| DMM134  | Cdkn2a <sup>-/-</sup> _C57 | INS.SIN.LV.SF.GFP | LIVER | 3 | 14609416  | + | NM_001099674 | 1810022K09Rik | - |
| DMM 134 | Cdkn2a <sup>-/-</sup> _C57 | INS.SIN.LV.SF.GFP | LIVER | 3 | 14971114  | - | NM_009801    | Car2          | + |
| DMM140  | Cdkn2a <sup>-/-</sup> _C57 | INS.SIN.LV.SF.GFP | LIVER | 3 | 15324450  | - | NM_001076679 | Gm9733        | - |
| DMM141  | Cdkn2a <sup>-/-</sup> _C57 | INS.SIN.LV.SF.GFP | LIVER | 3 | 15445004  | + | NM_001002898 | Sirpb1        | - |
| DMM140  | Cdkn2a <sup>-/-</sup> _C57 | INS.SIN.LV.SF.GFP | LIVER | 3 | 15776787  | + | NM_001081687 | Gm5150        | - |
| DMM141  | Cdkn2a <sup>-/-</sup> _C57 | INS.SIN.LV.SF.GFP | LIVER | 3 | 18224220  | + | NM_007825    | Cyp7b1        | - |
| DMM141  | Cdkn2a <sup>-/-</sup> _C57 | INS.SIN.LV.SF.GFP | LIVER | 3 | 18563807  | + | NM_007825    | Cyp7b1        | - |
| DMM140  | Cdkn2a <sup>-/-</sup> _C57 | INS.SIN.LV.SF.GFP | LIVER | 3 | 19971960  | + | NM_009210    | Hltf          | + |
| DMM140  | Cdkn2a <sup>-/-</sup> _C57 | INS.SIN.LV.SF.GFP | LIVER | 3 | 20185939  | - | NM_029706    | Cpb1          | - |
| DMM139  | Cdkn2a <sup>-/-</sup> _C57 | INS.SIN.LV.SF.GFP | LIVER | 3 | 20357859  | + | NM_175086    | Agtr1b        | - |
| DMM141  | Cdkn2a <sup>-/-</sup> _C57 | INS.SIN.LV.SF.GFP | LIVER | 3 | 20377953  | - | NM_175086    | Agtr1b        | - |
| DMM140  | Cdkn2a <sup>-/-</sup> _C57 | INS.SIN.LV.SF.GFP | LIVER | 3 | 20724919  | + | NM_175086    | Agtr1b        | - |
| DMM141  | Cdkn2a <sup>-/-</sup> _C57 | INS.SIN.LV.SF.GFP | LIVER | 3 | 21526783  | + | NM_030732    | Tbl1xr1       | + |
| DMM140  | Cdkn2a <sup>-/-</sup> _C57 | INS.SIN.LV.SF.GFP | LIVER | 3 | 23894474  | + | NM_138666    | Nlgn1         | - |
| DMM140  | Cdkn2a <sup>-/-</sup> _C57 | INS.SIN.LV.SF.GFP | LIVER | 3 | 32251310  | + | NM_009517    | Zmat3         | - |
| DMM140  | Cdkn2a <sup>-/-</sup> _C57 | INS.SIN.LV.SF.GFP | LIVER | 3 | 33927591  | - | NM_001113188 | Fxr1          | + |
| DMM 142 | Cdkn2a <sup>-/-</sup> _C57 | INS.SIN.LV.SF.GFP | LIVER | 3 | 33946467  | - | NM_001113188 | Fxr1          | + |
| DMM 149 | Cdkn2a <sup>-/-</sup> _C57 | INS.SIN.LV.SF.GFP | LIVER | 3 | 36474729  | + | NM_027810    | Bbs7          | - |
| DMM141  | Cdkn2a <sup>-/-</sup> _C57 | INS.SIN.LV.SF.GFP | LIVER | 3 | 37043942  | + | NM_008366    | Ii2           | - |
| DMM 149 | Cdkn2a <sup>-/-</sup> _C57 | INS.SIN.LV.SF.GFP | LIVER | 3 | 38030033  | - | NM_001033198 | Ankrd50       | - |
| DMM146  | Cdkn2a <sup>-/-</sup> _C57 | INS.SIN.LV.SF.GFP | LIVER | 3 | 40421087  | + | NM_175515    | Intu          | + |
| DMM141  | Cdkn2a <sup>-/-</sup> _C57 | INS.SIN.LV.SF.GFP | LIVER | 3 | 40557506  | + | NM_011020    | Hspa4l        | + |
| DMM140  | Cdkn2a <sup>-/-</sup> _C57 | INS.SIN.LV.SF.GFP | LIVER | 3 | 41468433  | - | NM_001081411 | Sclt1         | - |

|         |                            |                   |       |   |          |   |              |               |   |
|---------|----------------------------|-------------------|-------|---|----------|---|--------------|---------------|---|
| DMM140  | Cdkn2a <sup>-/-</sup> _C57 | INS.SIN.LV.SF.GFP | LIVER | 3 | 41541946 | + | NM_001081411 | Sc11          | - |
| DMM 134 | Cdkn2a <sup>-/-</sup> _C57 | INS.SIN.LV.SF.GFP | LIVER | 3 | 43017839 | + | NM_001099785 | D3Erd751e     | + |
| DMM140  | Cdkn2a <sup>-/-</sup> _C57 | INS.SIN.LV.SF.GFP | LIVER | 3 | 43027313 | - | NM_001099785 | D3Erd751e     | + |
| DMM140  | Cdkn2a <sup>-/-</sup> _C57 | INS.SIN.LV.SF.GFP | LIVER | 3 | 45093224 | - | NM_001098170 | Pcdh10        | + |
| DMM 142 | Cdkn2a <sup>-/-</sup> _C57 | INS.SIN.LV.SF.GFP | LIVER | 3 | 47908070 | - | NR_003617    | 1700018B24Rik | - |
| DMM 134 | Cdkn2a <sup>-/-</sup> _C57 | INS.SIN.LV.SF.GFP | LIVER | 3 | 48382045 | - | NR_003617    | 1700018B24Rik | - |
| DMM132  | Cdkn2a <sup>-/-</sup> _C57 | INS.SIN.LV.SF.GFP | LIVER | 3 | 51063527 | - | NM_023502    | Elf2          | - |
| DMM139  | Cdkn2a <sup>-/-</sup> _C57 | INS.SIN.LV.SF.GFP | LIVER | 3 | 51242583 | + | NM_053089    | Narg1         | + |
| DMM141  | Cdkn2a <sup>-/-</sup> _C57 | INS.SIN.LV.SF.GFP | LIVER | 3 | 53660076 | - | NM_026435    | Ufm1          | - |
| DMM141  | Cdkn2a <sup>-/-</sup> _C57 | INS.SIN.LV.SF.GFP | LIVER | 3 | 53663703 | + | NM_026435    | Ufm1          | - |
| DMM140  | Cdkn2a <sup>-/-</sup> _C57 | INS.SIN.LV.SF.GFP | LIVER | 3 | 53666349 | + | NM_026435    | Ufm1          | - |
| DMM 142 | Cdkn2a <sup>-/-</sup> _C57 | INS.SIN.LV.SF.GFP | LIVER | 3 | 53827487 | - | NM_016984    | Trpc4         | + |
| DMM141  | Cdkn2a <sup>-/-</sup> _C57 | INS.SIN.LV.SF.GFP | LIVER | 3 | 54167255 | + | NM_015784    | Postn         | + |
| DMM 128 | Cdkn2a <sup>-/-</sup> _C57 | INS.SIN.LV.SF.GFP | LIVER | 3 | 54531970 | - | NM_027148    | Exosc8        | - |
| DMM140  | Cdkn2a <sup>-/-</sup> _C57 | INS.SIN.LV.SF.GFP | LIVER | 3 | 55479017 | + | NM_030595    | Nbea          | - |
| DMM141  | Cdkn2a <sup>-/-</sup> _C57 | INS.SIN.LV.SF.GFP | LIVER | 3 | 57546182 | - | NM_001113413 | Rnf13         | + |
| DMM141  | Cdkn2a <sup>-/-</sup> _C57 | INS.SIN.LV.SF.GFP | LIVER | 3 | 57601419 | - | NM_011883    | Rnf13         | + |
| DMM140  | Cdkn2a <sup>-/-</sup> _C57 | INS.SIN.LV.SF.GFP | LIVER | 3 | 57607840 | - | NM_011883    | Rnf13         | + |
| DMM140  | Cdkn2a <sup>-/-</sup> _C57 | INS.SIN.LV.SF.GFP | LIVER | 3 | 57645736 | + | NM_019410    | Pfn2          | - |
| DMM146  | Cdkn2a <sup>-/-</sup> _C57 | INS.SIN.LV.SF.GFP | LIVER | 3 | 58207767 | - | NM_001081229 | Tsc22d2       | + |
| DMM 135 | Cdkn2a <sup>-/-</sup> _C57 | INS.SIN.LV.SF.GFP | LIVER | 3 | 58222461 | + | NM_001081229 | Tsc22d2       | + |
| DMM 134 | Cdkn2a <sup>-/-</sup> _C57 | INS.SIN.LV.SF.GFP | LIVER | 3 | 58229566 | + | NM_001081229 | Tsc22d2       | + |
| DMM134  | Cdkn2a <sup>-/-</sup> _C57 | INS.SIN.LV.SF.GFP | LIVER | 3 | 58236213 | - | NM_001081229 | Tsc22d2       | + |
| DMM141  | Cdkn2a <sup>-/-</sup> _C57 | INS.SIN.LV.SF.GFP | LIVER | 3 | 58342334 | - | NM_001005509 | Eif2a         | + |
| DMM140  | Cdkn2a <sup>-/-</sup> _C57 | INS.SIN.LV.SF.GFP | LIVER | 3 | 59021140 | + | NM_027571    | P2ry12        | - |
| DMM140  | Cdkn2a <sup>-/-</sup> _C57 | INS.SIN.LV.SF.GFP | LIVER | 3 | 59025077 | - | NM_027571    | P2ry12        | - |
| DMM128  | Cdkn2a <sup>-/-</sup> _C57 | INS.SIN.LV.SF.GFP | LIVER | 3 | 60283915 | + | NM_020007    | Mbnl1         | + |
| DMM139  | Cdkn2a <sup>-/-</sup> _C57 | INS.SIN.LV.SF.GFP | LIVER | 3 | 60542024 | + | NM_020007    | Mbnl1         | + |
| DMM140  | Cdkn2a <sup>-/-</sup> _C57 | INS.SIN.LV.SF.GFP | LIVER | 3 | 61231375 | + | NM_028712    | Rap2b         | + |
| DMM140  | Cdkn2a <sup>-/-</sup> _C57 | INS.SIN.LV.SF.GFP | LIVER | 3 | 61285508 | - | NM_028712    | Rap2b         | + |
| DMM141  | Cdkn2a <sup>-/-</sup> _C57 | INS.SIN.LV.SF.GFP | LIVER | 3 | 62284794 | - | NM_028136    | Dhx36         | - |
| DMM 142 | Cdkn2a <sup>-/-</sup> _C57 | INS.SIN.LV.SF.GFP | LIVER | 3 | 63749759 | + | NM_015728    | Slc33a1       | - |
| DMM 134 | Cdkn2a <sup>-/-</sup> _C57 | INS.SIN.LV.SF.GFP | LIVER | 3 | 63806572 | + | NM_001033300 | Gmps          | + |
| DMM 142 | Cdkn2a <sup>-/-</sup> _C57 | INS.SIN.LV.SF.GFP | LIVER | 3 | 63814790 | + | NM_001033300 | Gmps          | + |
| DMM 142 | Cdkn2a <sup>-/-</sup> _C57 | INS.SIN.LV.SF.GFP | LIVER | 3 | 65351677 | - | NM_178892    | Tiparp        | + |

|         |                            |                   |       |   |           |   |              |               |   |
|---------|----------------------------|-------------------|-------|---|-----------|---|--------------|---------------|---|
| DMM141  | Cdkn2a <sup>-/-</sup> _C57 | INS.SIN.LV.SF.GFP | LIVER | 3 | 65356586  | + | NM_178892    | Tiparp        | + |
| DMM141  | Cdkn2a <sup>-/-</sup> _C57 | INS.SIN.LV.SF.GFP | LIVER | 3 | 68818644  | - | NM_133786    | Smc4          | + |
| DMM146  | Cdkn2a <sup>-/-</sup> _C57 | INS.SIN.LV.SF.GFP | LIVER | 3 | 68899818  | + | NM_008467    | Kpna4         | - |
| DMM 139 | Cdkn2a <sup>-/-</sup> _C57 | INS.SIN.LV.SF.GFP | LIVER | 3 | 69027369  | + | NM_178726    | Ppm11         | + |
| DMM146  | Cdkn2a <sup>-/-</sup> _C57 | INS.SIN.LV.SF.GFP | LIVER | 3 | 75159143  | - | NM_026460    | Serpini2      | - |
| DMM141  | Cdkn2a <sup>-/-</sup> _C57 | INS.SIN.LV.SF.GFP | LIVER | 3 | 75334787  | - | NM_019745    | Pcd10         | - |
| DMM141  | Cdkn2a <sup>-/-</sup> _C57 | INS.SIN.LV.SF.GFP | LIVER | 3 | 75728010  | + | NM_175193    | Golim4        | - |
| DMM 134 | Cdkn2a <sup>-/-</sup> _C57 | INS.SIN.LV.SF.GFP | LIVER | 3 | 79071010  | + | NM_001142953 | LOC100233207  | + |
| DMM130  | Cdkn2a <sup>-/-</sup> _C57 | INS.SIN.LV.SF.GFP | LIVER | 3 | 80849039  | - | NM_019971    | Pdgfc         | + |
| DMM141  | Cdkn2a <sup>-/-</sup> _C57 | INS.SIN.LV.SF.GFP | LIVER | 3 | 80977981  | + | NM_019971    | Pdgfc         | + |
| DMM141  | Cdkn2a <sup>-/-</sup> _C57 | INS.SIN.LV.SF.GFP | LIVER | 3 | 81004642  | - | NM_019971    | Pdgfc         | + |
| DMM 134 | Cdkn2a <sup>-/-</sup> _C57 | INS.SIN.LV.SF.GFP | LIVER | 3 | 82852311  | + | NM_181849    | Fgb           | - |
| DMM146  | Cdkn2a <sup>-/-</sup> _C57 | INS.SIN.LV.SF.GFP | LIVER | 3 | 85448128  | - | NM_144896    | Pet112l       | + |
| DMM141  | Cdkn2a <sup>-/-</sup> _C57 | INS.SIN.LV.SF.GFP | LIVER | 3 | 85944212  | - | NM_016959    | Rps3a         | - |
| DMM 142 | Cdkn2a <sup>-/-</sup> _C57 | INS.SIN.LV.SF.GFP | LIVER | 3 | 86008962  | + | NM_001077687 | Lrba          | + |
| DMM 149 | Cdkn2a <sup>-/-</sup> _C57 | INS.SIN.LV.SF.GFP | LIVER | 3 | 87152707  | - | NM_009690    | Cd5l          | + |
| DMM139  | Cdkn2a <sup>-/-</sup> _C57 | INS.SIN.LV.SF.GFP | LIVER | 3 | 88506561  | - | NM_028814    | 2810403A07Rik | + |
| DMM128  | Cdkn2a <sup>-/-</sup> _C57 | INS.SIN.LV.SF.GFP | LIVER | 3 | 94346539  | - | NM_001082484 | Snx27         | - |
| DMM140  | Cdkn2a <sup>-/-</sup> _C57 | INS.SIN.LV.SF.GFP | LIVER | 3 | 95401704  | - | NM_146133    | Golph3l       | + |
| DMM134  | Cdkn2a <sup>-/-</sup> _C57 | INS.SIN.LV.SF.GFP | LIVER | 3 | 95824649  | - | NM_013841    | Vps45         | - |
| DMM134  | Cdkn2a <sup>-/-</sup> _C57 | INS.SIN.LV.SF.GFP | LIVER | 3 | 96412925  | + | NR_003619    | 6330549D23Rik | - |
| DMM134  | Cdkn2a <sup>-/-</sup> _C57 | INS.SIN.LV.SF.GFP | LIVER | 3 | 97569283  | + | NM_178080    | Pde4dip       | - |
| DMM128  | Cdkn2a <sup>-/-</sup> _C57 | INS.SIN.LV.SF.GFP | LIVER | 3 | 98645526  | - | NM_008293    | Hsd3b1        | - |
| DMM 140 | Cdkn2a <sup>-/-</sup> _C57 | INS.SIN.LV.SF.GFP | LIVER | 3 | 99012164  | - | NM_027462    | Wars2         | + |
| DMM128  | Cdkn2a <sup>-/-</sup> _C57 | INS.SIN.LV.SF.GFP | LIVER | 3 | 100808522 | + | NM_001099332 | Igsf2         | - |
| DMM135  | Cdkn2a <sup>-/-</sup> _C57 | INS.SIN.LV.SF.GFP | LIVER | 3 | 103035626 | + | NM_001079830 | Trim33        | + |
| DMM146  | Cdkn2a <sup>-/-</sup> _C57 | INS.SIN.LV.SF.GFP | LIVER | 3 | 103106668 | - | NM_001079830 | Trim33        | + |
| DMM140  | Cdkn2a <sup>-/-</sup> _C57 | INS.SIN.LV.SF.GFP | LIVER | 3 | 103124236 | - | NM_001079830 | Trim33        | + |
| DMM140  | Cdkn2a <sup>-/-</sup> _C57 | INS.SIN.LV.SF.GFP | LIVER | 3 | 103745796 | - | NM_172684    | Rsb1          | + |
| DMM139  | Cdkn2a <sup>-/-</sup> _C57 | INS.SIN.LV.SF.GFP | LIVER | 3 | 104373561 | + | NM_001025067 | Lrig2         | - |
| DMM141  | Cdkn2a <sup>-/-</sup> _C57 | INS.SIN.LV.SF.GFP | LIVER | 3 | 104639038 | + | NM_009797    | Capza1        | - |
| DMM146  | Cdkn2a <sup>-/-</sup> _C57 | INS.SIN.LV.SF.GFP | LIVER | 3 | 106268448 | - | NM_001093754 | Dennd2d       | + |
| DMM128  | Cdkn2a <sup>-/-</sup> _C57 | INS.SIN.LV.SF.GFP | LIVER | 3 | 106585265 | - | NM_007651    | Cd53          | - |
| DMM 142 | Cdkn2a <sup>-/-</sup> _C57 | INS.SIN.LV.SF.GFP | LIVER | 3 | 106854593 | - | NM_008418    | Kcna3         | + |
| DMM140  | Cdkn2a <sup>-/-</sup> _C57 | INS.SIN.LV.SF.GFP | LIVER | 3 | 107129846 | + | NM_001045807 | Rbm15         | - |



|         |                            |                   |       |   |           |   |              |            |   |
|---------|----------------------------|-------------------|-------|---|-----------|---|--------------|------------|---|
| DMM141  | Cdkn2a <sup>-/-</sup> _C57 | INS.SIN.LV.SF.GFP | LIVER | 3 | 108712504 | - | NM_025845    | Prpf38b    | - |
| DMM140  | Cdkn2a <sup>-/-</sup> _C57 | INS.SIN.LV.SF.GFP | LIVER | 3 | 109094885 | - | NM_020505    | Vav3       | + |
| DMM141  | Cdkn2a <sup>-/-</sup> _C57 | INS.SIN.LV.SF.GFP | LIVER | 3 | 113313541 | - | NM_001038696 | Rnpc3      | - |
| DMM146  | Cdkn2a <sup>-/-</sup> _C57 | INS.SIN.LV.SF.GFP | LIVER | 3 | 114980948 | + | NM_153157    | Olfm3      | + |
| DMM134  | Cdkn2a <sup>-/-</sup> _C57 | INS.SIN.LV.SF.GFP | LIVER | 3 | 115378726 | + | NM_007901    | Slpr1      | - |
| DMM146  | Cdkn2a <sup>-/-</sup> _C57 | INS.SIN.LV.SF.GFP | LIVER | 3 | 116389107 | + | NM_144902    | Slc35a3    | - |
| DMM141  | Cdkn2a <sup>-/-</sup> _C57 | INS.SIN.LV.SF.GFP | LIVER | 3 | 117007626 | - | NM_177664    | D3Bwg0562e | - |
| DMM134  | Cdkn2a <sup>-/-</sup> _C57 | INS.SIN.LV.SF.GFP | LIVER | 3 | 117020093 | + | NM_177664    | D3Bwg0562e | - |
| DMM 134 | Cdkn2a <sup>-/-</sup> _C57 | INS.SIN.LV.SF.GFP | LIVER | 3 | 117021284 | + | NM_177664    | D3Bwg0562e | - |
| DMM140  | Cdkn2a <sup>-/-</sup> _C57 | INS.SIN.LV.SF.GFP | LIVER | 3 | 117567524 | - | NM_029655    | Snx7       | - |
| DMM140  | Cdkn2a <sup>-/-</sup> _C57 | INS.SIN.LV.SF.GFP | LIVER | 3 | 117683002 | + | NM_029655    | Snx7       | - |
| DMM 142 | Cdkn2a <sup>-/-</sup> _C57 | INS.SIN.LV.SF.GFP | LIVER | 3 | 117766346 | + | NM_029655    | Snx7       | - |
| DMM140  | Cdkn2a <sup>-/-</sup> _C57 | INS.SIN.LV.SF.GFP | LIVER | 3 | 122270983 | + | NM_001114665 | Fnbp11     | - |
| DMM128  | Cdkn2a <sup>-/-</sup> _C57 | INS.SIN.LV.SF.GFP | LIVER | 3 | 123032657 | + | NM_027135    | Sec24d     | + |
| DMM134  | Cdkn2a <sup>-/-</sup> _C57 | INS.SIN.LV.SF.GFP | LIVER | 3 | 123039713 | - | NM_027135    | Sec24d     | + |
| DMM140  | Cdkn2a <sup>-/-</sup> _C57 | INS.SIN.LV.SF.GFP | LIVER | 3 | 123219755 | - | NM_031186    | Ndst3      | - |
| DMM134  | Cdkn2a <sup>-/-</sup> _C57 | INS.SIN.LV.SF.GFP | LIVER | 3 | 127046325 | + | NM_138593    | Larp7      | - |
| DMM140  | Cdkn2a <sup>-/-</sup> _C57 | INS.SIN.LV.SF.GFP | LIVER | 3 | 129743519 | + | NM_207209    | Sec24b     | - |
| DMM140  | Cdkn2a <sup>-/-</sup> _C57 | INS.SIN.LV.SF.GFP | LIVER | 3 | 130068992 | + | NM_029838    | Col25a1    | + |
| DMM140  | Cdkn2a <sup>-/-</sup> _C57 | INS.SIN.LV.SF.GFP | LIVER | 3 | 131754481 | + | NM_020265    | Dkk2       | + |
| DMM 134 | Cdkn2a <sup>-/-</sup> _C57 | INS.SIN.LV.SF.GFP | LIVER | 3 | 131779263 | + | NM_020265    | Dkk2       | + |
| DMM141  | Cdkn2a <sup>-/-</sup> _C57 | INS.SIN.LV.SF.GFP | LIVER | 3 | 132645010 | + | NM_026231    | Gstcd      | - |
| DMM140  | Cdkn2a <sup>-/-</sup> _C57 | INS.SIN.LV.SF.GFP | LIVER | 3 | 133163104 | + | NM_001040400 | Tet2       | - |
| DMM141  | Cdkn2a <sup>-/-</sup> _C57 | INS.SIN.LV.SF.GFP | LIVER | 3 | 135120663 | + | NM_025356    | Ube2d3     | + |
| DMM140  | Cdkn2a <sup>-/-</sup> _C57 | INS.SIN.LV.SF.GFP | LIVER | 3 | 135281451 | - | NM_008689    | Nfkb1      | - |
| DMM128  | Cdkn2a <sup>-/-</sup> _C57 | INS.SIN.LV.SF.GFP | LIVER | 3 | 137571345 | + | NM_001033155 | Dnajb14    | + |
| DMM134  | Cdkn2a <sup>-/-</sup> _C57 | INS.SIN.LV.SF.GFP | LIVER | 3 | 138138853 | + | NM_175224    | Metap1     | - |
| DMM140  | Cdkn2a <sup>-/-</sup> _C57 | INS.SIN.LV.SF.GFP | LIVER | 3 | 138551028 | + | NM_019571    | Tspan5     | + |
| DMM134  | Cdkn2a <sup>-/-</sup> _C57 | INS.SIN.LV.SF.GFP | LIVER | 3 | 142039151 | + | NM_022554    | Pdlim5     | - |
| DMM141  | Cdkn2a <sup>-/-</sup> _C57 | INS.SIN.LV.SF.GFP | LIVER | 3 | 142452705 | + | NM_178654    | Pkn2       | - |
| DMM141  | Cdkn2a <sup>-/-</sup> _C57 | INS.SIN.LV.SF.GFP | LIVER | 3 | 142516803 | - | NM_178654    | Pkn2       | - |
| DMM139  | Cdkn2a <sup>-/-</sup> _C57 | INS.SIN.LV.SF.GFP | LIVER | 3 | 143854941 | + | NM_010723    | Lmo4       | - |
| DMM134  | Cdkn2a <sup>-/-</sup> _C57 | INS.SIN.LV.SF.GFP | LIVER | 3 | 144790027 | + | NM_025714    | Odf2l      | + |
| DMM134  | Cdkn2a <sup>-/-</sup> _C57 | INS.SIN.LV.SF.GFP | LIVER | 3 | 145678130 | - | NM_172864    | Wdr63      | - |
| DMM128  | Cdkn2a <sup>-/-</sup> _C57 | INS.SIN.LV.SF.GFP | LIVER | 3 | 148531481 | - | NM_001081298 | Lphn2      | - |

|         |                            |                   |       |   |           |   |              |               |   |
|---------|----------------------------|-------------------|-------|---|-----------|---|--------------|---------------|---|
| DMM 141 | Cdkn2a <sup>-/-</sup> _C57 | INS.SIN.LV.SF.GFP | LIVER | 3 | 151862543 | + | NM_027287    | Dnajb4        | - |
| DMM128  | Cdkn2a <sup>-/-</sup> _C57 | INS.SIN.LV.SF.GFP | LIVER | 3 | 151884104 | + | NM_057172    | Fubp1         | + |
| DMM141  | Cdkn2a <sup>-/-</sup> _C57 | INS.SIN.LV.SF.GFP | LIVER | 3 | 151983786 | - | NM_174868    | Fam73a        | - |
| DMM139  | Cdkn2a <sup>-/-</sup> _C57 | INS.SIN.LV.SF.GFP | LIVER | 3 | 152039005 | - | NM_001076676 | Usp33         | + |
| DMM139  | Cdkn2a <sup>-/-</sup> _C57 | INS.SIN.LV.SF.GFP | LIVER | 3 | 154547066 | + | NM_177066    | Tnni3k        | - |
| DMM 128 | Cdkn2a <sup>-/-</sup> _C57 | INS.SIN.LV.SF.GFP | LIVER | 3 | 156972837 | + | NM_001039094 | Negr1         | + |
| DMM141  | Cdkn2a <sup>-/-</sup> _C57 | INS.SIN.LV.SF.GFP | LIVER | 3 | 157620077 | - | NM_001013806 | Ankrd13c      | + |
| DMM146  | Cdkn2a <sup>-/-</sup> _C57 | INS.SIN.LV.SF.GFP | LIVER | 3 | 159171296 | - | NM_029523    | Depdc1a       | + |
| DMM141  | Cdkn2a <sup>-/-</sup> _C57 | INS.SIN.LV.SF.GFP | LIVER | 3 | 159557284 | - | NM_026582    | Gpr177        | + |
| DMM 135 | Cdkn2a <sup>-/-</sup> _C57 | INS.SIN.LV.SF.GFP | LIVER | 4 | 3806862   | + | NM_020021    | Mos           | - |
| DMM 132 | Cdkn2a <sup>-/-</sup> _C57 | INS.SIN.LV.SF.GFP | LIVER | 4 | 3978812   | - | NM_001080710 | Sdr16c6       | - |
| DMM141  | Cdkn2a <sup>-/-</sup> _C57 | INS.SIN.LV.SF.GFP | LIVER | 4 | 6146093   | - | NM_026534    | Ubxn2b        | + |
| DMM141  | Cdkn2a <sup>-/-</sup> _C57 | INS.SIN.LV.SF.GFP | LIVER | 4 | 6301494   | + | NM_001098227 | Sdcbp         | + |
| DMM 128 | Cdkn2a <sup>-/-</sup> _C57 | INS.SIN.LV.SF.GFP | LIVER | 4 | 6345020   | + | NM_010945    | Nsmaf         | - |
| DMM128  | Cdkn2a <sup>-/-</sup> _C57 | INS.SIN.LV.SF.GFP | LIVER | 4 | 7385871   | + | NM_145711    | Tox           | - |
| DMM140  | Cdkn2a <sup>-/-</sup> _C57 | INS.SIN.LV.SF.GFP | LIVER | 4 | 7504046   | + | NM_007592    | Car8          | - |
| DMM 134 | Cdkn2a <sup>-/-</sup> _C57 | INS.SIN.LV.SF.GFP | LIVER | 4 | 8479113   | + | NM_021518    | Rab2a         | + |
| DMM141  | Cdkn2a <sup>-/-</sup> _C57 | INS.SIN.LV.SF.GFP | LIVER | 4 | 9158681   | + | NM_028940    | Rlbp111       | + |
| DMM 133 | Cdkn2a <sup>-/-</sup> _C57 | INS.SIN.LV.SF.GFP | LIVER | 4 | 9508246   | + | NM_023066    | Asph          | - |
| DMM139  | Cdkn2a <sup>-/-</sup> _C57 | INS.SIN.LV.SF.GFP | LIVER | 4 | 9562919   | + | NM_133723    | Asph          | - |
| DMM 142 | Cdkn2a <sup>-/-</sup> _C57 | INS.SIN.LV.SF.GFP | LIVER | 4 | 9690017   | - | NM_013526    | Gdf6          | + |
| DMM139  | Cdkn2a <sup>-/-</sup> _C57 | INS.SIN.LV.SF.GFP | LIVER | 4 | 10913615  | + | NM_175175    | Plekhf2       | - |
| DMM140  | Cdkn2a <sup>-/-</sup> _C57 | INS.SIN.LV.SF.GFP | LIVER | 4 | 10945657  | + | NM_175175    | Plekhf2       | - |
| DMM140  | Cdkn2a <sup>-/-</sup> _C57 | INS.SIN.LV.SF.GFP | LIVER | 4 | 11138523  | + | NM_001159595 | Ints8         | - |
| DMM 142 | Cdkn2a <sup>-/-</sup> _C57 | INS.SIN.LV.SF.GFP | LIVER | 4 | 11164749  | - | NM_001159595 | Ints8         | - |
| DMM146  | Cdkn2a <sup>-/-</sup> _C57 | INS.SIN.LV.SF.GFP | LIVER | 4 | 11463575  | + | NM_001081183 | 1110037F02Rik | + |
| DMM 128 | Cdkn2a <sup>-/-</sup> _C57 | INS.SIN.LV.SF.GFP | LIVER | 4 | 11538223  | - | NM_001039556 | E130016E03Rik | + |
| DMM134  | Cdkn2a <sup>-/-</sup> _C57 | INS.SIN.LV.SF.GFP | LIVER | 4 | 11887007  | + | NM_001033453 | Ppm2c         | - |
| DMM141  | Cdkn2a <sup>-/-</sup> _C57 | INS.SIN.LV.SF.GFP | LIVER | 4 | 11924701  | + | NM_001033453 | Ppm2c         | - |
| DMM141  | Cdkn2a <sup>-/-</sup> _C57 | INS.SIN.LV.SF.GFP | LIVER | 4 | 11991559  | + | NM_177861    | Tmem67        | - |
| DMM128  | Cdkn2a <sup>-/-</sup> _C57 | INS.SIN.LV.SF.GFP | LIVER | 4 | 14838060  | + | NM_028264    | Tmem55a       | + |
| DMM141  | Cdkn2a <sup>-/-</sup> _C57 | INS.SIN.LV.SF.GFP | LIVER | 4 | 14838317  | - | NM_028264    | Tmem55a       | + |
| DMM 141 | Cdkn2a <sup>-/-</sup> _C57 | INS.SIN.LV.SF.GFP | LIVER | 4 | 15863897  | + | NM_026172    | Decr1         | - |
| DMM 134 | Cdkn2a <sup>-/-</sup> _C57 | INS.SIN.LV.SF.GFP | LIVER | 4 | 15931539  | - | NM_145950    | Osgin2        | - |
| DMM141  | Cdkn2a <sup>-/-</sup> _C57 | INS.SIN.LV.SF.GFP | LIVER | 4 | 19458435  | + | NM_027769    | Cpne3         | - |

|         |                            |                   |       |   |          |   |              |               |   |
|---------|----------------------------|-------------------|-------|---|----------|---|--------------|---------------|---|
| DMM128  | Cdkn2a <sup>-/-</sup> _C57 | INS.SIN.LV.SF.GFP | LIVER | 4 | 19537507 | + | NM_177327    | Wwp1          | - |
| DMM134  | Cdkn2a <sup>-/-</sup> _C57 | INS.SIN.LV.SF.GFP | LIVER | 4 | 19566344 | + | NM_177327    | Wwp1          | - |
| DMM 142 | Cdkn2a <sup>-/-</sup> _C57 | INS.SIN.LV.SF.GFP | LIVER | 4 | 19666230 | - | NM_177327    | Wwp1          | - |
| DMM140  | Cdkn2a <sup>-/-</sup> _C57 | INS.SIN.LV.SF.GFP | LIVER | 4 | 19754208 | + | NM_028746    | Slc7a13       | + |
| DMM 142 | Cdkn2a <sup>-/-</sup> _C57 | INS.SIN.LV.SF.GFP | LIVER | 4 | 19986185 | + | NM_010281    | Ggh           | + |
| DMM140  | Cdkn2a <sup>-/-</sup> _C57 | INS.SIN.LV.SF.GFP | LIVER | 4 | 19993973 | - | NM_010281    | Ggh           | + |
| DMM146  | Cdkn2a <sup>-/-</sup> _C57 | INS.SIN.LV.SF.GFP | LIVER | 4 | 21693057 | - | NM_152825    | Usp45         | + |
| DMM 128 | Cdkn2a <sup>-/-</sup> _C57 | INS.SIN.LV.SF.GFP | LIVER | 4 | 22333882 | + | NM_172988    | Fbxl4         | + |
| DMM141  | Cdkn2a <sup>-/-</sup> _C57 | INS.SIN.LV.SF.GFP | LIVER | 4 | 22351664 | - | NM_172988    | Fbxl4         | + |
| DMM139  | Cdkn2a <sup>-/-</sup> _C57 | INS.SIN.LV.SF.GFP | LIVER | 4 | 22356573 | - | NM_172988    | Fbxl4         | + |
| DMM 139 | Cdkn2a <sup>-/-</sup> _C57 | INS.SIN.LV.SF.GFP | LIVER | 4 | 24482494 | + | NM_199467    | F730047E07Rik | + |
| DMM 149 | Cdkn2a <sup>-/-</sup> _C57 | INS.SIN.LV.SF.GFP | LIVER | 4 | 24527305 | + | NM_199467    | F730047E07Rik | + |
| DMM139  | Cdkn2a <sup>-/-</sup> _C57 | INS.SIN.LV.SF.GFP | LIVER | 4 | 25187535 | - | NM_026194    | 1810074P20Rik | - |
| DMM 139 | Cdkn2a <sup>-/-</sup> _C57 | INS.SIN.LV.SF.GFP | LIVER | 4 | 28863971 | - | NM_001122889 | Epha7         | + |
| DMM140  | Cdkn2a <sup>-/-</sup> _C57 | INS.SIN.LV.SF.GFP | LIVER | 4 | 28891721 | - | NM_010141    | Epha7         | + |
| DMM139  | Cdkn2a <sup>-/-</sup> _C57 | INS.SIN.LV.SF.GFP | LIVER | 4 | 32725833 | - | NM_001122978 | Casp8ap2      | + |
| DMM 142 | Cdkn2a <sup>-/-</sup> _C57 | INS.SIN.LV.SF.GFP | LIVER | 4 | 33410598 | + | NM_011884    | Rnggt         | + |
| DMM 134 | Cdkn2a <sup>-/-</sup> _C57 | INS.SIN.LV.SF.GFP | LIVER | 4 | 35144566 | + | NM_001081343 | 3110043O21Rik | - |
| DMM140  | Cdkn2a <sup>-/-</sup> _C57 | INS.SIN.LV.SF.GFP | LIVER | 4 | 35936130 | + | NM_175516    | Lingo2        | - |
| DMM 128 | Cdkn2a <sup>-/-</sup> _C57 | INS.SIN.LV.SF.GFP | LIVER | 4 | 35965272 | - | NM_175516    | Lingo2        | - |
| DMM141  | Cdkn2a <sup>-/-</sup> _C57 | INS.SIN.LV.SF.GFP | LIVER | 4 | 41418700 | + | NM_025539    | Nudt2         | + |
| DMM128  | Cdkn2a <sup>-/-</sup> _C57 | INS.SIN.LV.SF.GFP | LIVER | 4 | 45357480 | + | NM_153167    | Wdr32         | + |
| DMM140  | Cdkn2a <sup>-/-</sup> _C57 | INS.SIN.LV.SF.GFP | LIVER | 4 | 48232085 | - | NM_029572    | Erp44         | - |
| DMM128  | Cdkn2a <sup>-/-</sup> _C57 | INS.SIN.LV.SF.GFP | LIVER | 4 | 48688614 | - | NM_026509    | Murc          | + |
| DMM140  | Cdkn2a <sup>-/-</sup> _C57 | INS.SIN.LV.SF.GFP | LIVER | 4 | 52486163 | + | NM_008017    | Smc2          | + |
| DMM141  | Cdkn2a <sup>-/-</sup> _C57 | INS.SIN.LV.SF.GFP | LIVER | 4 | 53008647 | + | NM_028529    | 1700054F22Rik | + |
| DMM141  | Cdkn2a <sup>-/-</sup> _C57 | INS.SIN.LV.SF.GFP | LIVER | 4 | 53760215 | + | NM_139309    | Fktn          | + |
| DMM140  | Cdkn2a <sup>-/-</sup> _C57 | INS.SIN.LV.SF.GFP | LIVER | 4 | 53865989 | - | NM_028053    | Tmem38b       | + |
| DMM140  | Cdkn2a <sup>-/-</sup> _C57 | INS.SIN.LV.SF.GFP | LIVER | 4 | 56157465 | - | NM_025271    | Actl7b        | - |
| DMM128  | Cdkn2a <sup>-/-</sup> _C57 | INS.SIN.LV.SF.GFP | LIVER | 4 | 58811115 | - | NM_172381    | AI314180      | - |
| DMM141  | Cdkn2a <sup>-/-</sup> _C57 | INS.SIN.LV.SF.GFP | LIVER | 4 | 59673241 | + | NM_001015681 | E130308A19Rik | + |
| DMM146  | Cdkn2a <sup>-/-</sup> _C57 | INS.SIN.LV.SF.GFP | LIVER | 4 | 63533418 | - | NM_009403    | Tnfsf8        | - |
| DMM 134 | Cdkn2a <sup>-/-</sup> _C57 | INS.SIN.LV.SF.GFP | LIVER | 4 | 66464741 | + | NM_021297    | Tlr4          | + |
| DMM128  | Cdkn2a <sup>-/-</sup> _C57 | INS.SIN.LV.SF.GFP | LIVER | 4 | 66520626 | + | NM_021297    | Tlr4          | + |
| DMM 128 | Cdkn2a <sup>-/-</sup> _C57 | INS.SIN.LV.SF.GFP | LIVER | 4 | 70189553 | + | NM_172694    | Megf9         | - |

|         |                            |                   |       |   |          |   |              |               |   |
|---------|----------------------------|-------------------|-------|---|----------|---|--------------|---------------|---|
| DMM140  | Cdkn2a <sup>-/-</sup> _C57 | INS.SIN.LV.SF.GFP | LIVER | 4 | 71285967 | + | NM_011599    | Tle1          | - |
| DMM134  | Cdkn2a <sup>-/-</sup> _C57 | INS.SIN.LV.SF.GFP | LIVER | 4 | 71683085 | - | NM_011599    | Tle1          | - |
| DMM134  | Cdkn2a <sup>-/-</sup> _C57 | INS.SIN.LV.SF.GFP | LIVER | 4 | 71791862 | - | NM_011599    | Tle1          | - |
| DMM141  | Cdkn2a <sup>-/-</sup> _C57 | INS.SIN.LV.SF.GFP | LIVER | 4 | 71845413 | - | NM_011599    | Tle1          | - |
| DMM140  | Cdkn2a <sup>-/-</sup> _C57 | INS.SIN.LV.SF.GFP | LIVER | 4 | 72037937 | + | NM_011599    | Tle1          | - |
| DMM128  | Cdkn2a <sup>-/-</sup> _C57 | INS.SIN.LV.SF.GFP | LIVER | 4 | 72092373 | - | NM_011599    | Tle1          | - |
| DMM 141 | Cdkn2a <sup>-/-</sup> _C57 | INS.SIN.LV.SF.GFP | LIVER | 4 | 72101593 | - | NM_011599    | Tle1          | - |
| DMM140  | Cdkn2a <sup>-/-</sup> _C57 | INS.SIN.LV.SF.GFP | LIVER | 4 | 73936591 | - | NM_144787    | Kdm4c         | + |
| DMM 142 | Cdkn2a <sup>-/-</sup> _C57 | INS.SIN.LV.SF.GFP | LIVER | 4 | 73962527 | + | NM_144787    | Kdm4c         | + |
| DMM 134 | Cdkn2a <sup>-/-</sup> _C57 | INS.SIN.LV.SF.GFP | LIVER | 4 | 74020190 | + | NM_144787    | Kdm4c         | + |
| DMM140  | Cdkn2a <sup>-/-</sup> _C57 | INS.SIN.LV.SF.GFP | LIVER | 4 | 74902935 | + | NM_025849    | 3110001D03Rik | - |
| DMM146  | Cdkn2a <sup>-/-</sup> _C57 | INS.SIN.LV.SF.GFP | LIVER | 4 | 75043268 | - | NM_025849    | 3110001D03Rik | - |
| DMM140  | Cdkn2a <sup>-/-</sup> _C57 | INS.SIN.LV.SF.GFP | LIVER | 4 | 75077050 | + | NM_025849    | 3110001D03Rik | - |
| DMM141  | Cdkn2a <sup>-/-</sup> _C57 | INS.SIN.LV.SF.GFP | LIVER | 4 | 79950723 | - | NM_031202    | Tyrp1         | + |
| DMM141  | Cdkn2a <sup>-/-</sup> _C57 | INS.SIN.LV.SF.GFP | LIVER | 4 | 79959352 | + | NM_031202    | Tyrp1         | + |
| DMM128  | Cdkn2a <sup>-/-</sup> _C57 | INS.SIN.LV.SF.GFP | LIVER | 4 | 79960308 | + | NM_031202    | Tyrp1         | + |
| DMM141  | Cdkn2a <sup>-/-</sup> _C57 | INS.SIN.LV.SF.GFP | LIVER | 4 | 79972879 | - | NM_031202    | Tyrp1         | + |
| DMM 141 | Cdkn2a <sup>-/-</sup> _C57 | INS.SIN.LV.SF.GFP | LIVER | 4 | 80912681 | + | NM_010820    | Mpdz          | - |
| DMM140  | Cdkn2a <sup>-/-</sup> _C57 | INS.SIN.LV.SF.GFP | LIVER | 4 | 81370397 | - | NM_010820    | Mpdz          | - |
| DMM141  | Cdkn2a <sup>-/-</sup> _C57 | INS.SIN.LV.SF.GFP | LIVER | 4 | 83141604 | + | NM_133948    | Psip1         | - |
| DMM128  | Cdkn2a <sup>-/-</sup> _C57 | INS.SIN.LV.SF.GFP | LIVER | 4 | 83189931 | - | NM_001081012 | 4930473A06Rik | + |
| DMM141  | Cdkn2a <sup>-/-</sup> _C57 | INS.SIN.LV.SF.GFP | LIVER | 4 | 83723289 | - | NM_172870    | Bnc2          | - |
| DMM140  | Cdkn2a <sup>-/-</sup> _C57 | INS.SIN.LV.SF.GFP | LIVER | 4 | 84651848 | - | NM_175275    | Cntln         | + |
| DMM140  | Cdkn2a <sup>-/-</sup> _C57 | INS.SIN.LV.SF.GFP | LIVER | 4 | 84689450 | + | NM_175275    | Cntln         | + |
| DMM128  | Cdkn2a <sup>-/-</sup> _C57 | INS.SIN.LV.SF.GFP | LIVER | 4 | 84743028 | + | NM_175275    | Cntln         | + |
| DMM146  | Cdkn2a <sup>-/-</sup> _C57 | INS.SIN.LV.SF.GFP | LIVER | 4 | 86423166 | - | NM_001081014 | Dennd4c       | + |
| DMM128  | Cdkn2a <sup>-/-</sup> _C57 | INS.SIN.LV.SF.GFP | LIVER | 4 | 86439576 | + | NM_001081014 | Dennd4c       | + |
| DMM140  | Cdkn2a <sup>-/-</sup> _C57 | INS.SIN.LV.SF.GFP | LIVER | 4 | 86455386 | - | NM_001081014 | Dennd4c       | + |
| DMM139  | Cdkn2a <sup>-/-</sup> _C57 | INS.SIN.LV.SF.GFP | LIVER | 4 | 86484399 | - | NM_001081014 | Dennd4c       | + |
| DMM 134 | Cdkn2a <sup>-/-</sup> _C57 | INS.SIN.LV.SF.GFP | LIVER | 4 | 86485948 | + | NM_001081014 | Dennd4c       | + |
| DMM128  | Cdkn2a <sup>-/-</sup> _C57 | INS.SIN.LV.SF.GFP | LIVER | 4 | 86535122 | + | NM_139306    | Acer2         | + |
| DMM 142 | Cdkn2a <sup>-/-</sup> _C57 | INS.SIN.LV.SF.GFP | LIVER | 4 | 87465270 | + | NM_027326    | Mlt3          | - |
| DMM141  | Cdkn2a <sup>-/-</sup> _C57 | INS.SIN.LV.SF.GFP | LIVER | 4 | 93182339 | + | NM_026954    | Tusc1         | - |
| DMM140  | Cdkn2a <sup>-/-</sup> _C57 | INS.SIN.LV.SF.GFP | LIVER | 4 | 93188343 | - | NM_026954    | Tusc1         | - |
| DMM 141 | Cdkn2a <sup>-/-</sup> _C57 | INS.SIN.LV.SF.GFP | LIVER | 4 | 93216248 | + | NM_026954    | Tusc1         | - |

|         |                            |                   |       |   |           |   |              |         |   |
|---------|----------------------------|-------------------|-------|---|-----------|---|--------------|---------|---|
| DMM134  | Cdkn2a <sup>-/-</sup> _C57 | INS.SIN.LV.SF.GFP | LIVER | 4 | 94618495  | - | NM_177239    | Mysm1   | - |
| DMM140  | Cdkn2a <sup>-/-</sup> _C57 | INS.SIN.LV.SF.GFP | LIVER | 4 | 94635083  | - | NM_177239    | Mysm1   | - |
| DMM146  | Cdkn2a <sup>-/-</sup> _C57 | INS.SIN.LV.SF.GFP | LIVER | 4 | 95579260  | + | NM_001113412 | Fggy    | + |
| DMM141  | Cdkn2a <sup>-/-</sup> _C57 | INS.SIN.LV.SF.GFP | LIVER | 4 | 97460103  | - | NM_001122953 | Nfia    | + |
| DMM140  | Cdkn2a <sup>-/-</sup> _C57 | INS.SIN.LV.SF.GFP | LIVER | 4 | 97490850  | + | NM_001122953 | Nfia    | + |
| DMM140  | Cdkn2a <sup>-/-</sup> _C57 | INS.SIN.LV.SF.GFP | LIVER | 4 | 97757411  | + | NM_001122952 | Nfia    | + |
| DMM140  | Cdkn2a <sup>-/-</sup> _C57 | INS.SIN.LV.SF.GFP | LIVER | 4 | 98037304  | - | NM_053157    | Tm2d1   | - |
| DMM142  | Cdkn2a <sup>-/-</sup> _C57 | INS.SIN.LV.SF.GFP | LIVER | 4 | 98614052  | - | NM_026082    | Dock7   | - |
| DMM141  | Cdkn2a <sup>-/-</sup> _C57 | INS.SIN.LV.SF.GFP | LIVER | 4 | 100786900 | + | NM_183024    | Raver2  | + |
| DMM 141 | Cdkn2a <sup>-/-</sup> _C57 | INS.SIN.LV.SF.GFP | LIVER | 4 | 101043852 | + | NM_009647    | Ak3l1   | + |
| DMM133  | Cdkn2a <sup>-/-</sup> _C57 | INS.SIN.LV.SF.GFP | LIVER | 4 | 102811044 | - | NM_001039081 | Mier1   | + |
| DMM 128 | Cdkn2a <sup>-/-</sup> _C57 | INS.SIN.LV.SF.GFP | LIVER | 4 | 102828818 | - | NM_001039081 | Mier1   | + |
| DMM 134 | Cdkn2a <sup>-/-</sup> _C57 | INS.SIN.LV.SF.GFP | LIVER | 4 | 107928774 | + | NM_001033634 | Zyg11b  | - |
| DMM134  | Cdkn2a <sup>-/-</sup> _C57 | INS.SIN.LV.SF.GFP | LIVER | 4 | 108959788 | + | NM_007943    | Eps15   | + |
| DMM140  | Cdkn2a <sup>-/-</sup> _C57 | INS.SIN.LV.SF.GFP | LIVER | 4 | 109133752 | + | NM_013876    | Rnf11   | - |
| DMM140  | Cdkn2a <sup>-/-</sup> _C57 | INS.SIN.LV.SF.GFP | LIVER | 4 | 109461319 | - | NM_007983    | Faf1    | + |
| DMM140  | Cdkn2a <sup>-/-</sup> _C57 | INS.SIN.LV.SF.GFP | LIVER | 4 | 114642739 | + | NM_025647    | Cmpk1   | - |
| DMM140  | Cdkn2a <sup>-/-</sup> _C57 | INS.SIN.LV.SF.GFP | LIVER | 4 | 116241601 | - | NM_029868    | Gpbp11l | + |
| DMM140  | Cdkn2a <sup>-/-</sup> _C57 | INS.SIN.LV.SF.GFP | LIVER | 4 | 119517704 | + | NM_010657    | Hivep3  | + |
| DMM134  | Cdkn2a <sup>-/-</sup> _C57 | INS.SIN.LV.SF.GFP | LIVER | 4 | 120485052 | - | NM_008692    | Nfyc    | - |
| DMM140  | Cdkn2a <sup>-/-</sup> _C57 | INS.SIN.LV.SF.GFP | LIVER | 4 | 120866773 | - | NM_001081013 | Rlf     | - |
| DMM141  | Cdkn2a <sup>-/-</sup> _C57 | INS.SIN.LV.SF.GFP | LIVER | 4 | 123143519 | + | NM_009600    | Macf1   | - |
| DMM 134 | Cdkn2a <sup>-/-</sup> _C57 | INS.SIN.LV.SF.GFP | LIVER | 4 | 123295406 | - | NM_009600    | Macf1   | - |
| DMM139  | Cdkn2a <sup>-/-</sup> _C57 | INS.SIN.LV.SF.GFP | LIVER | 4 | 126594792 | + | NM_001114399 | Zmym4   | - |
| DMM140  | Cdkn2a <sup>-/-</sup> _C57 | INS.SIN.LV.SF.GFP | LIVER | 4 | 126702801 | - | NM_023603    | Sfpq    | + |
| DMM 139 | Cdkn2a <sup>-/-</sup> _C57 | INS.SIN.LV.SF.GFP | LIVER | 4 | 131947243 | + | NM_175306    | Phactr4 | - |
| DMM139  | Cdkn2a <sup>-/-</sup> _C57 | INS.SIN.LV.SF.GFP | LIVER | 4 | 132037756 | - | NM_144907    | Sesn2   | - |
| DMM140  | Cdkn2a <sup>-/-</sup> _C57 | INS.SIN.LV.SF.GFP | LIVER | 4 | 132251437 | + | NM_010166    | Eya3    | + |
| DMM 134 | Cdkn2a <sup>-/-</sup> _C57 | INS.SIN.LV.SF.GFP | LIVER | 4 | 132627466 | + | NM_146155    | Ahdc1   | + |
| DMM 128 | Cdkn2a <sup>-/-</sup> _C57 | INS.SIN.LV.SF.GFP | LIVER | 4 | 137019762 | - | NM_008305    | Hspg2   | + |
| DMM 134 | Cdkn2a <sup>-/-</sup> _C57 | INS.SIN.LV.SF.GFP | LIVER | 4 | 140711157 | - | NM_172518    | Fbxo42  | + |
| DMM 134 | Cdkn2a <sup>-/-</sup> _C57 | INS.SIN.LV.SF.GFP | LIVER | 4 | 140875420 | - | NM_010139    | Epha2   | + |
| DMM 149 | Cdkn2a <sup>-/-</sup> _C57 | INS.SIN.LV.SF.GFP | LIVER | 4 | 141617001 | + | NM_145402    | Tmem51  | - |
| DMM146  | Cdkn2a <sup>-/-</sup> _C57 | INS.SIN.LV.SF.GFP | LIVER | 4 | 144608187 | + | NM_001128198 | Vps13d  | - |
| DMM 149 | Cdkn2a <sup>-/-</sup> _C57 | INS.SIN.LV.SF.GFP | LIVER | 4 | 144608370 | - | NM_001128198 | Vps13d  | - |

|         |                            |                   |       |   |           |   |              |               |   |
|---------|----------------------------|-------------------|-------|---|-----------|---|--------------|---------------|---|
| DMM141  | Cdkn2a <sup>-/-</sup> _C57 | INS.SIN.LV.SF.GFP | LIVER | 4 | 147170347 | + | NM_001127189 | Gm13157       | - |
| DMM141  | Cdkn2a <sup>-/-</sup> _C57 | INS.SIN.LV.SF.GFP | LIVER | 4 | 148588313 | - | NM_207682    | Kif1b         | - |
| DMM 141 | Cdkn2a <sup>-/-</sup> _C57 | INS.SIN.LV.SF.GFP | LIVER | 4 | 148788137 | + | NM_022022    | Ube4b         | - |
| DMM139  | Cdkn2a <sup>-/-</sup> _C57 | INS.SIN.LV.SF.GFP | LIVER | 4 | 149707398 | + | NM_001085492 | Rere          | + |
| DMM141  | Cdkn2a <sup>-/-</sup> _C57 | INS.SIN.LV.SF.GFP | LIVER | 5 | 3564353   | + | NM_001042501 | 5830415L20Rik | + |
| DMM146  | Cdkn2a <sup>-/-</sup> _C57 | INS.SIN.LV.SF.GFP | LIVER | 5 | 3644174   | - | NM_026033    | Gatad1        | - |
| DMM141  | Cdkn2a <sup>-/-</sup> _C57 | INS.SIN.LV.SF.GFP | LIVER | 5 | 3752492   | - | NM_001003909 | Ankib1        | - |
| DMM128  | Cdkn2a <sup>-/-</sup> _C57 | INS.SIN.LV.SF.GFP | LIVER | 5 | 4471575   | - | NM_001042670 | Gm9897        | + |
| DMM 134 | Cdkn2a <sup>-/-</sup> _C57 | INS.SIN.LV.SF.GFP | LIVER | 5 | 5178031   | - | NM_011074    | Pftk1         | - |
| DMM141  | Cdkn2a <sup>-/-</sup> _C57 | INS.SIN.LV.SF.GFP | LIVER | 5 | 5181518   | + | NM_011074    | Pftk1         | - |
| DMM128  | Cdkn2a <sup>-/-</sup> _C57 | INS.SIN.LV.SF.GFP | LIVER | 5 | 5220466   | - | NM_011074    | Pftk1         | - |
| DMM133  | Cdkn2a <sup>-/-</sup> _C57 | INS.SIN.LV.SF.GFP | LIVER | 5 | 5225610   | + | NM_011074    | Pftk1         | - |
| DMM 130 | Cdkn2a <sup>-/-</sup> _C57 | INS.SIN.LV.SF.GFP | LIVER | 5 | 8089333   | + | NM_001098225 | Adam22        | - |
| DMM 140 | Cdkn2a <sup>-/-</sup> _C57 | INS.SIN.LV.SF.GFP | LIVER | 5 | 8903766   | + | NM_008830    | Abcb4         | + |
| DMM140  | Cdkn2a <sup>-/-</sup> _C57 | INS.SIN.LV.SF.GFP | LIVER | 5 | 9005367   | - | NM_023733    | Crot          | - |
| DMM139  | Cdkn2a <sup>-/-</sup> _C57 | INS.SIN.LV.SF.GFP | LIVER | 5 | 10767029  | - | NR_003596    | Gm6455        | + |
| DMM140  | Cdkn2a <sup>-/-</sup> _C57 | INS.SIN.LV.SF.GFP | LIVER | 5 | 14448733  | - | NM_001110796 | Pclo          | + |
| DMM134  | Cdkn2a <sup>-/-</sup> _C57 | INS.SIN.LV.SF.GFP | LIVER | 5 | 15832148  | + | NM_001110843 | Cacna2d1      | + |
| DMM140  | Cdkn2a <sup>-/-</sup> _C57 | INS.SIN.LV.SF.GFP | LIVER | 5 | 16115606  | + | NM_010427    | Hgf           | + |
| DMM140  | Cdkn2a <sup>-/-</sup> _C57 | INS.SIN.LV.SF.GFP | LIVER | 5 | 17293008  | + | NM_001159555 | Cd36          | - |
| DMM139  | Cdkn2a <sup>-/-</sup> _C57 | INS.SIN.LV.SF.GFP | LIVER | 5 | 17340433  | - | NM_001159555 | Cd36          | - |
| DMM128  | Cdkn2a <sup>-/-</sup> _C57 | INS.SIN.LV.SF.GFP | LIVER | 5 | 17489209  | - | NM_001081143 | Gnat3         | + |
| DMM134  | Cdkn2a <sup>-/-</sup> _C57 | INS.SIN.LV.SF.GFP | LIVER | 5 | 17862126  | - | NM_010305    | Gnai1         | - |
| DMM141  | Cdkn2a <sup>-/-</sup> _C57 | INS.SIN.LV.SF.GFP | LIVER | 5 | 19398836  | - | NM_015823    | Magi2         | + |
| DMM140  | Cdkn2a <sup>-/-</sup> _C57 | INS.SIN.LV.SF.GFP | LIVER | 5 | 19453754  | + | NM_015823    | Magi2         | + |
| DMM141  | Cdkn2a <sup>-/-</sup> _C57 | INS.SIN.LV.SF.GFP | LIVER | 5 | 19965764  | + | NM_015823    | Magi2         | + |
| DMM141  | Cdkn2a <sup>-/-</sup> _C57 | INS.SIN.LV.SF.GFP | LIVER | 5 | 20351721  | - | NM_172992    | Phtf2         | - |
| DMM140  | Cdkn2a <sup>-/-</sup> _C57 | INS.SIN.LV.SF.GFP | LIVER | 5 | 20519483  | + | NM_011203    | Ptpn12        | - |
| DMM 134 | Cdkn2a <sup>-/-</sup> _C57 | INS.SIN.LV.SF.GFP | LIVER | 5 | 20552236  | + | NM_011203    | Ptpn12        | - |
| DMM130  | Cdkn2a <sup>-/-</sup> _C57 | INS.SIN.LV.SF.GFP | LIVER | 5 | 20749779  | + | NM_175437    | Pion          | + |
| DMM134  | Cdkn2a <sup>-/-</sup> _C57 | INS.SIN.LV.SF.GFP | LIVER | 5 | 21209939  | + | NM_178728    | Napepld       | - |
| DMM 128 | Cdkn2a <sup>-/-</sup> _C57 | INS.SIN.LV.SF.GFP | LIVER | 5 | 21994875  | + | NM_011959    | Orc5l         | - |
| DMM142  | Cdkn2a <sup>-/-</sup> _C57 | INS.SIN.LV.SF.GFP | LIVER | 5 | 22025203  | - | NM_011959    | Orc5l         | - |
| DMM 134 | Cdkn2a <sup>-/-</sup> _C57 | INS.SIN.LV.SF.GFP | LIVER | 5 | 22032352  | - | NM_011959    | Orc5l         | - |
| DMM128  | Cdkn2a <sup>-/-</sup> _C57 | INS.SIN.LV.SF.GFP | LIVER | 5 | 22933414  | - | NM_009274    | Srpk2         | - |

|         |                            |                   |       |   |          |   |              |               |   |
|---------|----------------------------|-------------------|-------|---|----------|---|--------------|---------------|---|
| DMM141  | Cdkn2a <sup>-/-</sup> _C57 | INS.SIN.LV.SF.GFP | LIVER | 5 | 22943177 | + | NM_009274    | Srpk2         | - |
| DMM134  | Cdkn2a <sup>-/-</sup> _C57 | INS.SIN.LV.SF.GFP | LIVER | 5 | 22944849 | + | NM_009274    | Srpk2         | - |
| DMM140  | Cdkn2a <sup>-/-</sup> _C57 | INS.SIN.LV.SF.GFP | LIVER | 5 | 23202732 | - | NM_178403    | Pus7          | - |
| DMM140  | Cdkn2a <sup>-/-</sup> _C57 | INS.SIN.LV.SF.GFP | LIVER | 5 | 24830619 | + | NM_001081383 | Mll3          | - |
| DMM139  | Cdkn2a <sup>-/-</sup> _C57 | INS.SIN.LV.SF.GFP | LIVER | 5 | 27334633 | + | NM_010075    | Dpp6          | + |
| DMM141  | Cdkn2a <sup>-/-</sup> _C57 | INS.SIN.LV.SF.GFP | LIVER | 5 | 27518724 | - | NM_010075    | Dpp6          | + |
| DMM 128 | Cdkn2a <sup>-/-</sup> _C57 | INS.SIN.LV.SF.GFP | LIVER | 5 | 28671627 | + | NM_028234    | Prr8          | + |
| DMM140  | Cdkn2a <sup>-/-</sup> _C57 | INS.SIN.LV.SF.GFP | LIVER | 5 | 30490969 | + | NM_145558    | Hadhb         | + |
| DMM141  | Cdkn2a <sup>-/-</sup> _C57 | INS.SIN.LV.SF.GFP | LIVER | 5 | 34205765 | + | NM_001081102 | Whsc1         | + |
| DMM 137 | Cdkn2a <sup>-/-</sup> _C57 | INS.SIN.LV.SF.GFP | LIVER | 5 | 43636103 | + | NM_175937    | Cpeb2         | + |
| DMM134  | Cdkn2a <sup>-/-</sup> _C57 | INS.SIN.LV.SF.GFP | LIVER | 5 | 43660933 | - | NM_175937    | Cpeb2         | + |
| DMM 128 | Cdkn2a <sup>-/-</sup> _C57 | INS.SIN.LV.SF.GFP | LIVER | 5 | 43679246 | - | NM_175937    | Cpeb2         | + |
| DMM140  | Cdkn2a <sup>-/-</sup> _C57 | INS.SIN.LV.SF.GFP | LIVER | 5 | 44574512 | + | NM_173764    | Tapt1         | - |
| DMM140  | Cdkn2a <sup>-/-</sup> _C57 | INS.SIN.LV.SF.GFP | LIVER | 5 | 46091684 | - | NM_019438    | Ncapg         | + |
| DMM132  | Cdkn2a <sup>-/-</sup> _C57 | INS.SIN.LV.SF.GFP | LIVER | 5 | 46115446 | - | NM_178142    | Lcorl         | - |
| DMM 141 | Cdkn2a <sup>-/-</sup> _C57 | INS.SIN.LV.SF.GFP | LIVER | 5 | 46167353 | - | NM_172153    | Lcorl         | - |
| DMM140  | Cdkn2a <sup>-/-</sup> _C57 | INS.SIN.LV.SF.GFP | LIVER | 5 | 47861263 | + | NM_178804    | Slit2         | + |
| DMM141  | Cdkn2a <sup>-/-</sup> _C57 | INS.SIN.LV.SF.GFP | LIVER | 5 | 48198515 | - | NM_178804    | Slit2         | + |
| DMM 139 | Cdkn2a <sup>-/-</sup> _C57 | INS.SIN.LV.SF.GFP | LIVER | 5 | 49737518 | + | NM_030265    | Kcnip4        | - |
| DMM 134 | Cdkn2a <sup>-/-</sup> _C57 | INS.SIN.LV.SF.GFP | LIVER | 5 | 50333675 | - | NM_030265    | Kcnip4        | - |
| DMM 128 | Cdkn2a <sup>-/-</sup> _C57 | INS.SIN.LV.SF.GFP | LIVER | 5 | 50411006 | + | NM_030265    | Kcnip4        | - |
| DMM 141 | Cdkn2a <sup>-/-</sup> _C57 | INS.SIN.LV.SF.GFP | LIVER | 5 | 52541334 | - | NM_007839    | Dhx15         | - |
| DMM146  | Cdkn2a <sup>-/-</sup> _C57 | INS.SIN.LV.SF.GFP | LIVER | 5 | 52569907 | - | NM_001042620 | Dhx15         | - |
| DMM128  | Cdkn2a <sup>-/-</sup> _C57 | INS.SIN.LV.SF.GFP | LIVER | 5 | 53203648 | + | NM_030185    | Zcchc4        | + |
| DMM130  | Cdkn2a <sup>-/-</sup> _C57 | INS.SIN.LV.SF.GFP | LIVER | 5 | 53572198 | - | NM_172710    | 2310045A20Rik | - |
| DMM140  | Cdkn2a <sup>-/-</sup> _C57 | INS.SIN.LV.SF.GFP | LIVER | 5 | 54463873 | - | NM_001081103 | Stim2         | + |
| DMM140  | Cdkn2a <sup>-/-</sup> _C57 | INS.SIN.LV.SF.GFP | LIVER | 5 | 54604594 | - | NM_001081103 | Stim2         | + |
| DMM133  | Cdkn2a <sup>-/-</sup> _C57 | INS.SIN.LV.SF.GFP | LIVER | 5 | 58317102 | - | NM_001122758 | Pedh7         | + |
| DMM 130 | Cdkn2a <sup>-/-</sup> _C57 | INS.SIN.LV.SF.GFP | LIVER | 5 | 60688049 | + | NM_019468    | G6pd2         | + |
| DMM 130 | Cdkn2a <sup>-/-</sup> _C57 | INS.SIN.LV.SF.GFP | LIVER | 5 | 60688097 | + | NM_019468    | G6pd2         | + |
| DMM130  | Cdkn2a <sup>-/-</sup> _C57 | INS.SIN.LV.SF.GFP | LIVER | 5 | 60688124 | - | NM_019468    | G6pd2         | + |
| DMM140  | Cdkn2a <sup>-/-</sup> _C57 | INS.SIN.LV.SF.GFP | LIVER | 5 | 63278794 | - | NM_178407    | Arap2         | - |
| DMM141  | Cdkn2a <sup>-/-</sup> _C57 | INS.SIN.LV.SF.GFP | LIVER | 5 | 64948465 | + | NM_019636    | Tbc1d1        | + |
| DMM130  | Cdkn2a <sup>-/-</sup> _C57 | INS.SIN.LV.SF.GFP | LIVER | 5 | 65383058 | + | NM_026667    | Fam114a1      | + |
| DMM140  | Cdkn2a <sup>-/-</sup> _C57 | INS.SIN.LV.SF.GFP | LIVER | 5 | 65644978 | - | NM_153391    | Wdr19         | + |

|         |                            |                   |       |   |           |   |              |               |   |
|---------|----------------------------|-------------------|-------|---|-----------|---|--------------|---------------|---|
| DMM139  | Cdkn2a <sup>-/-</sup> _C57 | INS.SIN.LV.SF.GFP | LIVER | 5 | 65954770  | - | NM_016786    | Ube2k         | + |
| DMM141  | Cdkn2a <sup>-/-</sup> _C57 | INS.SIN.LV.SF.GFP | LIVER | 5 | 66106375  | - | NM_001081321 | Pds5a         | - |
| DMM146  | Cdkn2a <sup>-/-</sup> _C57 | INS.SIN.LV.SF.GFP | LIVER | 5 | 67675470  | + | NM_028975    | Tmem33        | + |
| DMM 141 | Cdkn2a <sup>-/-</sup> _C57 | INS.SIN.LV.SF.GFP | LIVER | 5 | 67815755  | - | NM_178651    | Slc30a9       | + |
| DMM 142 | Cdkn2a <sup>-/-</sup> _C57 | INS.SIN.LV.SF.GFP | LIVER | 5 | 68088953  | + | NM_001038999 | Atp8a1        | - |
| DMM141  | Cdkn2a <sup>-/-</sup> _C57 | INS.SIN.LV.SF.GFP | LIVER | 5 | 68175884  | + | NM_001038999 | Atp8a1        | - |
| DMM 128 | Cdkn2a <sup>-/-</sup> _C57 | INS.SIN.LV.SF.GFP | LIVER | 5 | 69124923  | - | NM_175519    | Kctd8         | - |
| DMM140  | Cdkn2a <sup>-/-</sup> _C57 | INS.SIN.LV.SF.GFP | LIVER | 5 | 69128707  | + | NM_175519    | Kctd8         | - |
| DMM134  | Cdkn2a <sup>-/-</sup> _C57 | INS.SIN.LV.SF.GFP | LIVER | 5 | 69951317  | + | NM_172711    | Guf1          | + |
| DMM140  | Cdkn2a <sup>-/-</sup> _C57 | INS.SIN.LV.SF.GFP | LIVER | 5 | 74808686  | - | NM_001114660 | Scfd2         | - |
| DMM140  | Cdkn2a <sup>-/-</sup> _C57 | INS.SIN.LV.SF.GFP | LIVER | 5 | 74881867  | - | NM_178672    | Scfd2         | - |
| DMM 139 | Cdkn2a <sup>-/-</sup> _C57 | INS.SIN.LV.SF.GFP | LIVER | 5 | 75947717  | - | NM_001122733 | Kit           | + |
| DMM141  | Cdkn2a <sup>-/-</sup> _C57 | INS.SIN.LV.SF.GFP | LIVER | 5 | 77389561  | - | NM_025939    | Paics         | + |
| DMM139  | Cdkn2a <sup>-/-</sup> _C57 | INS.SIN.LV.SF.GFP | LIVER | 5 | 79069606  | - | NM_001159518 | Igfbp7        | - |
| DMM140  | Cdkn2a <sup>-/-</sup> _C57 | INS.SIN.LV.SF.GFP | LIVER | 5 | 81359570  | + | NM_198702    | Lphn3         | + |
| DMM140  | Cdkn2a <sup>-/-</sup> _C57 | INS.SIN.LV.SF.GFP | LIVER | 5 | 81771568  | + | NM_198702    | Lphn3         | + |
| DMM 139 | Cdkn2a <sup>-/-</sup> _C57 | INS.SIN.LV.SF.GFP | LIVER | 5 | 86544788  | - | NM_172712    | Uba6          | - |
| DMM133  | Cdkn2a <sup>-/-</sup> _C57 | INS.SIN.LV.SF.GFP | LIVER | 5 | 86561242  | - | NM_172712    | Uba6          | - |
| DMM134  | Cdkn2a <sup>-/-</sup> _C57 | INS.SIN.LV.SF.GFP | LIVER | 5 | 86576470  | - | NM_172712    | Uba6          | - |
| DMM128  | Cdkn2a <sup>-/-</sup> _C57 | INS.SIN.LV.SF.GFP | LIVER | 5 | 86579460  | + | NM_172712    | Uba6          | - |
| DMM 134 | Cdkn2a <sup>-/-</sup> _C57 | INS.SIN.LV.SF.GFP | LIVER | 5 | 87242402  | - | NM_177680    | Ythdc1        | + |
| DMM134  | Cdkn2a <sup>-/-</sup> _C57 | INS.SIN.LV.SF.GFP | LIVER | 5 | 89008202  | + | NM_027530    | Rufy3         | + |
| DMM128  | Cdkn2a <sup>-/-</sup> _C57 | INS.SIN.LV.SF.GFP | LIVER | 5 | 89075684  | - | NM_027530    | Rufy3         | + |
| DMM 128 | Cdkn2a <sup>-/-</sup> _C57 | INS.SIN.LV.SF.GFP | LIVER | 5 | 90759989  | - | NM_030886    | Ankrd17       | - |
| DMM140  | Cdkn2a <sup>-/-</sup> _C57 | INS.SIN.LV.SF.GFP | LIVER | 5 | 91196038  | - | NM_023785    | Ppbp          | + |
| DMM140  | Cdkn2a <sup>-/-</sup> _C57 | INS.SIN.LV.SF.GFP | LIVER | 5 | 91416449  | - | NM_026788    | Mthfd2l       | + |
| DMM141  | Cdkn2a <sup>-/-</sup> _C57 | INS.SIN.LV.SF.GFP | LIVER | 5 | 92442831  | - | NM_016912    | Cdkl2         | - |
| DMM 149 | Cdkn2a <sup>-/-</sup> _C57 | INS.SIN.LV.SF.GFP | LIVER | 5 | 92494129  | - | NM_001080795 | G3bp2         | - |
| DMM 139 | Cdkn2a <sup>-/-</sup> _C57 | INS.SIN.LV.SF.GFP | LIVER | 5 | 92753916  | + | NM_008599    | Cxcl9         | - |
| DMM140  | Cdkn2a <sup>-/-</sup> _C57 | INS.SIN.LV.SF.GFP | LIVER | 5 | 96671445  | + | NM_053158    | Mrpl1         | + |
| DMM 142 | Cdkn2a <sup>-/-</sup> _C57 | INS.SIN.LV.SF.GFP | LIVER | 5 | 99131255  | + | NM_001024614 | 1700007G11Rik | + |
| DMM 142 | Cdkn2a <sup>-/-</sup> _C57 | INS.SIN.LV.SF.GFP | LIVER | 5 | 99876440  | - | NM_145839    | Rasgef1b      | - |
| DMM140  | Cdkn2a <sup>-/-</sup> _C57 | INS.SIN.LV.SF.GFP | LIVER | 5 | 100835782 | - | NM_001115010 | Lin54         | - |
| DMM141  | Cdkn2a <sup>-/-</sup> _C57 | INS.SIN.LV.SF.GFP | LIVER | 5 | 102412425 | + | NM_172882    | Wdfy3         | - |
| DMM140  | Cdkn2a <sup>-/-</sup> _C57 | INS.SIN.LV.SF.GFP | LIVER | 5 | 104139193 | - | NM_133919    | Aff1          | + |



|         |                            |                   |       |   |           |   |           |               |   |
|---------|----------------------------|-------------------|-------|---|-----------|---|-----------|---------------|---|
| DMM 141 | Cdkn2a <sup>-/-</sup> _C57 | INS.SIN.LV.SF.GFP | LIVER | 5 | 106317813 | - | NM_018759 | Zfp326        | + |
| DMM128  | Cdkn2a <sup>-/-</sup> _C57 | INS.SIN.LV.SF.GFP | LIVER | 5 | 108199695 | - | NM_007964 | Evi5          | - |
| DMM141  | Cdkn2a <sup>-/-</sup> _C57 | INS.SIN.LV.SF.GFP | LIVER | 5 | 108374867 | - | NM_026062 | Fam69a        | - |
| DMM 134 | Cdkn2a <sup>-/-</sup> _C57 | INS.SIN.LV.SF.GFP | LIVER | 5 | 108383957 | + | NM_026062 | Fam69a        | - |
| DMM133  | Cdkn2a <sup>-/-</sup> _C57 | INS.SIN.LV.SF.GFP | LIVER | 5 | 108708463 | - | NM_026106 | Dr1           | + |
| DMM 142 | Cdkn2a <sup>-/-</sup> _C57 | INS.SIN.LV.SF.GFP | LIVER | 5 | 110558340 | - | NM_172717 | Chfr          | + |
| DMM 149 | Cdkn2a <sup>-/-</sup> _C57 | INS.SIN.LV.SF.GFP | LIVER | 5 | 128105168 | - | NM_133895 | Slc15a4       | - |
| DMM140  | Cdkn2a <sup>-/-</sup> _C57 | INS.SIN.LV.SF.GFP | LIVER | 5 | 130669702 | - | NM_019983 | Rabgef1       | + |
| DMM 141 | Cdkn2a <sup>-/-</sup> _C57 | INS.SIN.LV.SF.GFP | LIVER | 5 | 139930505 | + | NM_028469 | 3110082I17Rik | - |
| DMM 142 | Cdkn2a <sup>-/-</sup> _C57 | INS.SIN.LV.SF.GFP | LIVER | 5 | 141502871 | - | NM_175362 | Card11        | - |
| DMM128  | Cdkn2a <sup>-/-</sup> _C57 | INS.SIN.LV.SF.GFP | LIVER | 5 | 142913874 | + | NM_199068 | Foxk1         | + |
| DMM 134 | Cdkn2a <sup>-/-</sup> _C57 | INS.SIN.LV.SF.GFP | LIVER | 5 | 150930490 | - | NM_080468 | Rxfp2         | + |
| DMM140  | Cdkn2a <sup>-/-</sup> _C57 | INS.SIN.LV.SF.GFP | LIVER | 5 | 151435748 | + | NM_201369 | N4bp2l2       | - |
| DMM140  | Cdkn2a <sup>-/-</sup> _C57 | INS.SIN.LV.SF.GFP | LIVER | 5 | 151528033 | - | NM_175310 | Pds5b         | + |
| DMM140  | Cdkn2a <sup>-/-</sup> _C57 | INS.SIN.LV.SF.GFP | LIVER | 5 | 151529229 | + | NM_175310 | Pds5b         | + |
| DMM 134 | Cdkn2a <sup>-/-</sup> _C57 | INS.SIN.LV.SF.GFP | LIVER | 5 | 151570623 | + | NM_175310 | Pds5b         | + |
| DMM 128 | Cdkn2a <sup>-/-</sup> _C57 | INS.SIN.LV.SF.GFP | LIVER | 5 | 151631767 | - | NM_175310 | Pds5b         | + |
| DMM133  | Cdkn2a <sup>-/-</sup> _C57 | INS.SIN.LV.SF.GFP | LIVER | 6 | 3504175   | + | NM_024260 | Ccdc132       | + |
| DMM140  | Cdkn2a <sup>-/-</sup> _C57 | INS.SIN.LV.SF.GFP | LIVER | 6 | 4032187   | + | NM_009748 | Bet1          | - |
| DMM 141 | Cdkn2a <sup>-/-</sup> _C57 | INS.SIN.LV.SF.GFP | LIVER | 6 | 5404833   | + | NM_023048 | Asb4          | + |
| DMM140  | Cdkn2a <sup>-/-</sup> _C57 | INS.SIN.LV.SF.GFP | LIVER | 6 | 5414468   | + | NM_013743 | Pdk4          | - |
| DMM140  | Cdkn2a <sup>-/-</sup> _C57 | INS.SIN.LV.SF.GFP | LIVER | 6 | 6060990   | + | NM_015829 | Slc25a13      | - |
| DMM140  | Cdkn2a <sup>-/-</sup> _C57 | INS.SIN.LV.SF.GFP | LIVER | 6 | 6228270   | + | NM_015829 | Slc25a13      | - |
| DMM 134 | Cdkn2a <sup>-/-</sup> _C57 | INS.SIN.LV.SF.GFP | LIVER | 6 | 6506380   | - | NM_009169 | Shfm1         | - |
| DMM140  | Cdkn2a <sup>-/-</sup> _C57 | INS.SIN.LV.SF.GFP | LIVER | 6 | 8164562   | - | NM_145374 | Mios          | + |
| DMM140  | Cdkn2a <sup>-/-</sup> _C57 | INS.SIN.LV.SF.GFP | LIVER | 6 | 8373159   | - | NM_133236 | Glcci1        | + |
| DMM 141 | Cdkn2a <sup>-/-</sup> _C57 | INS.SIN.LV.SF.GFP | LIVER | 6 | 8375325   | + | NM_133236 | Glcci1        | + |
| DMM134  | Cdkn2a <sup>-/-</sup> _C57 | INS.SIN.LV.SF.GFP | LIVER | 6 | 11898774  | + | NM_029404 | Phf14         | + |
| DMM141  | Cdkn2a <sup>-/-</sup> _C57 | INS.SIN.LV.SF.GFP | LIVER | 6 | 11967216  | + | NM_029404 | Phf14         | + |
| DMM 141 | Cdkn2a <sup>-/-</sup> _C57 | INS.SIN.LV.SF.GFP | LIVER | 6 | 12610466  | + | NM_027992 | Tmem106b      | + |
| DMM140  | Cdkn2a <sup>-/-</sup> _C57 | INS.SIN.LV.SF.GFP | LIVER | 6 | 13553988  | + | NM_028990 | Tmem168       | - |
| DMM 141 | Cdkn2a <sup>-/-</sup> _C57 | INS.SIN.LV.SF.GFP | LIVER | 6 | 13615821  | - | NM_175312 | B630005N14Rik | - |
| DMM146  | Cdkn2a <sup>-/-</sup> _C57 | INS.SIN.LV.SF.GFP | LIVER | 6 | 13664619  | - | NM_175312 | B630005N14Rik | - |
| DMM134  | Cdkn2a <sup>-/-</sup> _C57 | INS.SIN.LV.SF.GFP | LIVER | 6 | 16800805  | + | NM_031198 | Tcfec         | - |
| DMM146  | Cdkn2a <sup>-/-</sup> _C57 | INS.SIN.LV.SF.GFP | LIVER | 6 | 16807106  | - | NM_031198 | Tcfec         | - |

|         |                            |                   |       |   |          |   |              |               |   |
|---------|----------------------------|-------------------|-------|---|----------|---|--------------|---------------|---|
| DMM 134 | Cdkn2a <sup>-/-</sup> _C57 | INS.SIN.LV.SF.GFP | LIVER | 6 | 16815423 | + | NM_031198    | Tcfec         | - |
| DMM140  | Cdkn2a <sup>-/-</sup> _C57 | INS.SIN.LV.SF.GFP | LIVER | 6 | 16852254 | - | NM_031198    | Tcfec         | - |
| DMM140  | Cdkn2a <sup>-/-</sup> _C57 | INS.SIN.LV.SF.GFP | LIVER | 6 | 16852722 | - | NM_031198    | Tcfec         | - |
| DMM140  | Cdkn2a <sup>-/-</sup> _C57 | INS.SIN.LV.SF.GFP | LIVER | 6 | 17488298 | + | NM_008591    | Met           | + |
| DMM140  | Cdkn2a <sup>-/-</sup> _C57 | INS.SIN.LV.SF.GFP | LIVER | 6 | 17663602 | - | NM_001083315 | St7           | + |
| DMM139  | Cdkn2a <sup>-/-</sup> _C57 | INS.SIN.LV.SF.GFP | LIVER | 6 | 17734914 | - | NM_001083315 | St7           | + |
| DMM141  | Cdkn2a <sup>-/-</sup> _C57 | INS.SIN.LV.SF.GFP | LIVER | 6 | 17738941 | + | NM_001083315 | St7           | + |
| DMM128  | Cdkn2a <sup>-/-</sup> _C57 | INS.SIN.LV.SF.GFP | LIVER | 6 | 21912686 | + | NM_023626    | Ing3          | + |
| DMM 134 | Cdkn2a <sup>-/-</sup> _C57 | INS.SIN.LV.SF.GFP | LIVER | 6 | 24572045 | + | NM_028459    | Wasl          | - |
| DMM141  | Cdkn2a <sup>-/-</sup> _C57 | INS.SIN.LV.SF.GFP | LIVER | 6 | 24849528 | - | NM_028957    | Hyal5         | + |
| DMM128  | Cdkn2a <sup>-/-</sup> _C57 | INS.SIN.LV.SF.GFP | LIVER | 6 | 24874401 | - | NM_177013    | 6332401O19Rik | - |
| DMM 141 | Cdkn2a <sup>-/-</sup> _C57 | INS.SIN.LV.SF.GFP | LIVER | 6 | 25722380 | + | NM_133931    | Pot1a         | - |
| DMM 142 | Cdkn2a <sup>-/-</sup> _C57 | INS.SIN.LV.SF.GFP | LIVER | 6 | 25755797 | - | NM_133931    | Pot1a         | - |
| DMM 141 | Cdkn2a <sup>-/-</sup> _C57 | INS.SIN.LV.SF.GFP | LIVER | 6 | 26128052 | - | NM_133931    | Pot1a         | - |
| DMM139  | Cdkn2a <sup>-/-</sup> _C57 | INS.SIN.LV.SF.GFP | LIVER | 6 | 26214407 | - | NM_133931    | Pot1a         | - |
| DMM130  | Cdkn2a <sup>-/-</sup> _C57 | INS.SIN.LV.SF.GFP | LIVER | 6 | 26364086 | + | NM_133931    | Pot1a         | - |
| DMM130  | Cdkn2a <sup>-/-</sup> _C57 | INS.SIN.LV.SF.GFP | LIVER | 6 | 26364228 | - | NM_133931    | Pot1a         | - |
| DMM130  | Cdkn2a <sup>-/-</sup> _C57 | INS.SIN.LV.SF.GFP | LIVER | 6 | 26364395 | - | NM_133931    | Pot1a         | - |
| DMM 134 | Cdkn2a <sup>-/-</sup> _C57 | INS.SIN.LV.SF.GFP | LIVER | 6 | 26392976 | - | NM_133931    | Pot1a         | - |
| DMM 142 | Cdkn2a <sup>-/-</sup> _C57 | INS.SIN.LV.SF.GFP | LIVER | 6 | 29500501 | + | NM_177296    | Tnpo3         | - |
| DMM140  | Cdkn2a <sup>-/-</sup> _C57 | INS.SIN.LV.SF.GFP | LIVER | 6 | 31431944 | + | NM_013791    | Mkln1         | + |
| DMM141  | Cdkn2a <sup>-/-</sup> _C57 | INS.SIN.LV.SF.GFP | LIVER | 6 | 31456656 | - | NM_013791    | Mkln1         | + |
| DMM128  | Cdkn2a <sup>-/-</sup> _C57 | INS.SIN.LV.SF.GFP | LIVER | 6 | 32968206 | - | NM_025336    | Chchd3        | - |
| DMM140  | Cdkn2a <sup>-/-</sup> _C57 | INS.SIN.LV.SF.GFP | LIVER | 6 | 35473384 | - | NM_008098    | Mtpn          | - |
| DMM 149 | Cdkn2a <sup>-/-</sup> _C57 | INS.SIN.LV.SF.GFP | LIVER | 6 | 35477414 | + | NM_008098    | Mtpn          | - |
| DMM140  | Cdkn2a <sup>-/-</sup> _C57 | INS.SIN.LV.SF.GFP | LIVER | 6 | 35539924 | + | NM_008098    | Mtpn          | - |
| DMM 141 | Cdkn2a <sup>-/-</sup> _C57 | INS.SIN.LV.SF.GFP | LIVER | 6 | 36597083 | + | NM_008973    | Ptn           | - |
| DMM 131 | Cdkn2a <sup>-/-</sup> _C57 | INS.SIN.LV.SF.GFP | LIVER | 6 | 36628425 | - | NM_008973    | Ptn           | - |
| DMM 133 | Cdkn2a <sup>-/-</sup> _C57 | INS.SIN.LV.SF.GFP | LIVER | 6 | 37454096 | - | NM_145364    | Akr1d1        | + |
| DMM141  | Cdkn2a <sup>-/-</sup> _C57 | INS.SIN.LV.SF.GFP | LIVER | 6 | 37834139 | - | NM_145076    | Trim24        | + |
| DMM 133 | Cdkn2a <sup>-/-</sup> _C57 | INS.SIN.LV.SF.GFP | LIVER | 6 | 38263312 | - | NM_028421    | Zc3hav1       | - |
| DMM141  | Cdkn2a <sup>-/-</sup> _C57 | INS.SIN.LV.SF.GFP | LIVER | 6 | 38778236 | + | NM_001136065 | Hipk2         | - |
| DMM140  | Cdkn2a <sup>-/-</sup> _C57 | INS.SIN.LV.SF.GFP | LIVER | 6 | 39623740 | + | NM_139294    | Braf          | - |
| DMM141  | Cdkn2a <sup>-/-</sup> _C57 | INS.SIN.LV.SF.GFP | LIVER | 6 | 39640418 | + | NM_139294    | Braf          | - |
| DMM 135 | Cdkn2a <sup>-/-</sup> _C57 | INS.SIN.LV.SF.GFP | LIVER | 6 | 40334065 | - | NM_023538    | Agk           | + |

|         |                            |                   |       |   |          |   |              |               |   |
|---------|----------------------------|-------------------|-------|---|----------|---|--------------|---------------|---|
| DMM141  | Cdkn2a <sup>-/-</sup> _C57 | INS.SIN.LV.SF.GFP | LIVER | 6 | 40766122 | - | NM_139296    | Moxd2         | - |
| DMM130  | Cdkn2a <sup>-/-</sup> _C57 | INS.SIN.LV.SF.GFP | LIVER | 6 | 43400985 | - | NM_013861    | Tpk1          | - |
| DMM 141 | Cdkn2a <sup>-/-</sup> _C57 | INS.SIN.LV.SF.GFP | LIVER | 6 | 43415182 | - | NM_013861    | Tpk1          | - |
| DMM 134 | Cdkn2a <sup>-/-</sup> _C57 | INS.SIN.LV.SF.GFP | LIVER | 6 | 46090319 | + | NM_001004357 | Cntnap2       | + |
| DMM146  | Cdkn2a <sup>-/-</sup> _C57 | INS.SIN.LV.SF.GFP | LIVER | 6 | 46100913 | + | NM_001004357 | Cntnap2       | + |
| DMM 139 | Cdkn2a <sup>-/-</sup> _C57 | INS.SIN.LV.SF.GFP | LIVER | 6 | 46397038 | - | NM_001004357 | Cntnap2       | + |
| DMM128  | Cdkn2a <sup>-/-</sup> _C57 | INS.SIN.LV.SF.GFP | LIVER | 6 | 46397216 | - | NM_001004357 | Cntnap2       | + |
| DMM140  | Cdkn2a <sup>-/-</sup> _C57 | INS.SIN.LV.SF.GFP | LIVER | 6 | 48743268 | - | NM_031247    | Gimap3        | - |
| DMM146  | Cdkn2a <sup>-/-</sup> _C57 | INS.SIN.LV.SF.GFP | LIVER | 6 | 50072004 | - | NM_019939    | Mpp6          | + |
| DMM 129 | Cdkn2a <sup>-/-</sup> _C57 | INS.SIN.LV.SF.GFP | LIVER | 6 | 50519250 | + | NM_007808    | Cycs          | - |
| DMM 132 | Cdkn2a <sup>-/-</sup> _C57 | INS.SIN.LV.SF.GFP | LIVER | 6 | 54566889 | + | NM_001001335 | Plekha8       | + |
| DMM140  | Cdkn2a <sup>-/-</sup> _C57 | INS.SIN.LV.SF.GFP | LIVER | 6 | 56275682 | + | NM_001025568 | Pde1c         | - |
| DMM139  | Cdkn2a <sup>-/-</sup> _C57 | INS.SIN.LV.SF.GFP | LIVER | 6 | 56318753 | + | NM_001159955 | Pde1c         | - |
| DMM128  | Cdkn2a <sup>-/-</sup> _C57 | INS.SIN.LV.SF.GFP | LIVER | 6 | 56494376 | - | NM_025520    | Lsm5          | - |
| DMM 141 | Cdkn2a <sup>-/-</sup> _C57 | INS.SIN.LV.SF.GFP | LIVER | 6 | 56837175 | - | NM_026004    | Nt5c3         | - |
| DMM141  | Cdkn2a <sup>-/-</sup> _C57 | INS.SIN.LV.SF.GFP | LIVER | 6 | 57598000 | + | NM_025574    | Pigy          | - |
| DMM 142 | Cdkn2a <sup>-/-</sup> _C57 | INS.SIN.LV.SF.GFP | LIVER | 6 | 57608263 | - | NM_025574    | Pigy          | - |
| DMM128  | Cdkn2a <sup>-/-</sup> _C57 | INS.SIN.LV.SF.GFP | LIVER | 6 | 57674323 | - | NM_133737    | Lanc12        | + |
| DMM146  | Cdkn2a <sup>-/-</sup> _C57 | INS.SIN.LV.SF.GFP | LIVER | 6 | 58640526 | - | NM_011920    | Abcg2         | + |
| DMM141  | Cdkn2a <sup>-/-</sup> _C57 | INS.SIN.LV.SF.GFP | LIVER | 6 | 58645238 | + | NM_011920    | Abcg2         | + |
| DMM140  | Cdkn2a <sup>-/-</sup> _C57 | INS.SIN.LV.SF.GFP | LIVER | 6 | 58795537 | - | NM_028705    | Herc3         | + |
| DMM 129 | Cdkn2a <sup>-/-</sup> _C57 | INS.SIN.LV.SF.GFP | LIVER | 6 | 58821013 | + | NM_028705    | Herc3         | + |
| DMM139  | Cdkn2a <sup>-/-</sup> _C57 | INS.SIN.LV.SF.GFP | LIVER | 6 | 58872997 | + | NM_028705    | Herc3         | + |
| DMM139  | Cdkn2a <sup>-/-</sup> _C57 | INS.SIN.LV.SF.GFP | LIVER | 6 | 58901910 | - | NM_153574    | Fam13a        | - |
| DMM134  | Cdkn2a <sup>-/-</sup> _C57 | INS.SIN.LV.SF.GFP | LIVER | 6 | 63463492 | + | NM_008167    | Grid2         | + |
| DMM141  | Cdkn2a <sup>-/-</sup> _C57 | INS.SIN.LV.SF.GFP | LIVER | 6 | 65037672 | - | NM_007958    | Smarcad1      | + |
| DMM128  | Cdkn2a <sup>-/-</sup> _C57 | INS.SIN.LV.SF.GFP | LIVER | 6 | 65556559 | + | NM_001001495 | Tnip3         | + |
| DMM 141 | Cdkn2a <sup>-/-</sup> _C57 | INS.SIN.LV.SF.GFP | LIVER | 6 | 65863097 | - | NM_027547    | Prdm5         | + |
| DMM 142 | Cdkn2a <sup>-/-</sup> _C57 | INS.SIN.LV.SF.GFP | LIVER | 6 | 73685504 | - | NM_025737    | 4931417E11Rik | - |
| DMM128  | Cdkn2a <sup>-/-</sup> _C57 | INS.SIN.LV.SF.GFP | LIVER | 6 | 81372765 | - | NM_177884    | AW146020      | + |
| DMM140  | Cdkn2a <sup>-/-</sup> _C57 | INS.SIN.LV.SF.GFP | LIVER | 6 | 81412667 | + | NM_177884    | AW146020      | + |
| DMM128  | Cdkn2a <sup>-/-</sup> _C57 | INS.SIN.LV.SF.GFP | LIVER | 6 | 83290510 | + | NM_145571    | Mobk11b       | + |
| DMM140  | Cdkn2a <sup>-/-</sup> _C57 | INS.SIN.LV.SF.GFP | LIVER | 6 | 84640877 | + | NM_177077    | Exoc6b        | - |
| DMM 128 | Cdkn2a <sup>-/-</sup> _C57 | INS.SIN.LV.SF.GFP | LIVER | 6 | 84785373 | - | NM_177077    | Exoc6b        | - |
| DMM140  | Cdkn2a <sup>-/-</sup> _C57 | INS.SIN.LV.SF.GFP | LIVER | 6 | 90328448 | + | NM_030260    | Zxdc          | + |

|         |                            |                   |       |   |           |   |              |          |   |
|---------|----------------------------|-------------------|-------|---|-----------|---|--------------|----------|---|
| DMM130  | Cdkn2a <sup>-/-</sup> _C57 | INS.SIN.LV.SF.GFP | LIVER | 6 | 90658203  | - | NM_001134383 | Iqsec1   | - |
| DMM140  | Cdkn2a <sup>-/-</sup> _C57 | INS.SIN.LV.SF.GFP | LIVER | 6 | 90705779  | + | NM_001134384 | Iqsec1   | - |
| DMM134  | Cdkn2a <sup>-/-</sup> _C57 | INS.SIN.LV.SF.GFP | LIVER | 6 | 92163534  | - | NM_030081    | Zfyve20  | - |
| DMM140  | Cdkn2a <sup>-/-</sup> _C57 | INS.SIN.LV.SF.GFP | LIVER | 6 | 94476682  | + | NM_026255    | Slc25a26 | + |
| DMM140  | Cdkn2a <sup>-/-</sup> _C57 | INS.SIN.LV.SF.GFP | LIVER | 6 | 97122400  | + | NM_001081111 | Tmf1     | - |
| DMM141  | Cdkn2a <sup>-/-</sup> _C57 | INS.SIN.LV.SF.GFP | LIVER | 6 | 97313501  | + | NM_145148    | Frm4b    | - |
| DMM 134 | Cdkn2a <sup>-/-</sup> _C57 | INS.SIN.LV.SF.GFP | LIVER | 6 | 98253286  | - | NM_001128092 | Gm765    | - |
| DMM140  | Cdkn2a <sup>-/-</sup> _C57 | INS.SIN.LV.SF.GFP | LIVER | 6 | 98288861  | + | NM_001128092 | Gm765    | - |
| DMM 128 | Cdkn2a <sup>-/-</sup> _C57 | INS.SIN.LV.SF.GFP | LIVER | 6 | 100550910 | + | NM_181590    | Shq1     | - |
| DMM134  | Cdkn2a <sup>-/-</sup> _C57 | INS.SIN.LV.SF.GFP | LIVER | 6 | 100806329 | - | NM_182939    | Ppp4r2   | + |
| DMM140  | Cdkn2a <sup>-/-</sup> _C57 | INS.SIN.LV.SF.GFP | LIVER | 6 | 103732021 | - | NM_007697    | Chl1     | + |
| DMM 142 | Cdkn2a <sup>-/-</sup> _C57 | INS.SIN.LV.SF.GFP | LIVER | 6 | 106736312 | - | NM_021449    | Crbn     | - |
| DMM140  | Cdkn2a <sup>-/-</sup> _C57 | INS.SIN.LV.SF.GFP | LIVER | 6 | 107675933 | - | NM_008516    | Lrrn1    | + |
| DMM139  | Cdkn2a <sup>-/-</sup> _C57 | INS.SIN.LV.SF.GFP | LIVER | 6 | 107686930 | - | NM_008516    | Lrrn1    | + |
| DMM134  | Cdkn2a <sup>-/-</sup> _C57 | INS.SIN.LV.SF.GFP | LIVER | 6 | 108466206 | + | NM_010585    | Itr1     | + |
| DMM140  | Cdkn2a <sup>-/-</sup> _C57 | INS.SIN.LV.SF.GFP | LIVER | 6 | 109202758 | - | NM_138677    | Edem1    | + |
| DMM128  | Cdkn2a <sup>-/-</sup> _C57 | INS.SIN.LV.SF.GFP | LIVER | 6 | 109999682 | - | NM_177328    | Grm7     | + |
| DMM128  | Cdkn2a <sup>-/-</sup> _C57 | INS.SIN.LV.SF.GFP | LIVER | 6 | 115296156 | - | NM_001127330 | Pparg    | + |
| DMM141  | Cdkn2a <sup>-/-</sup> _C57 | INS.SIN.LV.SF.GFP | LIVER | 6 | 118342775 | + | NM_194339    | Bms1     | - |
| DMM140  | Cdkn2a <sup>-/-</sup> _C57 | INS.SIN.LV.SF.GFP | LIVER | 6 | 119321521 | - | NM_197985    | Adipor2  | - |
| DMM133  | Cdkn2a <sup>-/-</sup> _C57 | INS.SIN.LV.SF.GFP | LIVER | 6 | 119563978 | + | NM_053204    | Erc1     | - |
| DMM 141 | Cdkn2a <sup>-/-</sup> _C57 | INS.SIN.LV.SF.GFP | LIVER | 6 | 120130071 | - | NM_016718    | Ninj2    | + |
| DMM141  | Cdkn2a <sup>-/-</sup> _C57 | INS.SIN.LV.SF.GFP | LIVER | 6 | 120792591 | - | NM_153516    | Bcl2l13  | + |
| DMM 141 | Cdkn2a <sup>-/-</sup> _C57 | INS.SIN.LV.SF.GFP | LIVER | 6 | 122277173 | - | NM_001042623 | Phc1     | - |
| DMM133  | Cdkn2a <sup>-/-</sup> _C57 | INS.SIN.LV.SF.GFP | LIVER | 6 | 122976402 | + | NM_001005860 | Clec4a4  | + |
| DMM141  | Cdkn2a <sup>-/-</sup> _C57 | INS.SIN.LV.SF.GFP | LIVER | 6 | 123216952 | - | NM_010819    | Clec4d   | + |
| DMM140  | Cdkn2a <sup>-/-</sup> _C57 | INS.SIN.LV.SF.GFP | LIVER | 6 | 125260804 | + | NM_010736    | Ltbr     | - |
| DMM146  | Cdkn2a <sup>-/-</sup> _C57 | INS.SIN.LV.SF.GFP | LIVER | 6 | 126884342 | - | NM_009013    | Rad51ap1 | - |
| DMM146  | Cdkn2a <sup>-/-</sup> _C57 | INS.SIN.LV.SF.GFP | LIVER | 6 | 128600092 | - | NM_053165    | Clec2h   | + |
| DMM133  | Cdkn2a <sup>-/-</sup> _C57 | INS.SIN.LV.SF.GFP | LIVER | 6 | 129546557 | + | NM_010654    | Klrd1    | + |
| DMM140  | Cdkn2a <sup>-/-</sup> _C57 | INS.SIN.LV.SF.GFP | LIVER | 6 | 129654811 | - | NM_001012520 | Klri1    | - |
| DMM141  | Cdkn2a <sup>-/-</sup> _C57 | INS.SIN.LV.SF.GFP | LIVER | 6 | 134026988 | - | NM_007961    | Etv6     | + |
| DMM141  | Cdkn2a <sup>-/-</sup> _C57 | INS.SIN.LV.SF.GFP | LIVER | 6 | 134442280 | + | NM_008514    | Lrp6     | - |
| DMM128  | Cdkn2a <sup>-/-</sup> _C57 | INS.SIN.LV.SF.GFP | LIVER | 6 | 134487131 | - | NM_008514    | Lrp6     | - |
| DMM 133 | Cdkn2a <sup>-/-</sup> _C57 | INS.SIN.LV.SF.GFP | LIVER | 6 | 136481220 | - | NM_019426    | Atf7ip   | + |

|         |                            |                   |       |   |           |   |              |               |   |
|---------|----------------------------|-------------------|-------|---|-----------|---|--------------|---------------|---|
| DMM134  | Cdkn2a <sup>-/-</sup> _C57 | INS.SIN.LV.SF.GFP | LIVER | 6 | 140577158 | - | NM_009637    | Aebp2         | + |
| DMM141  | Cdkn2a <sup>-/-</sup> _C57 | INS.SIN.LV.SF.GFP | LIVER | 6 | 140697793 | - | NM_009637    | Aebp2         | + |
| DMM134  | Cdkn2a <sup>-/-</sup> _C57 | INS.SIN.LV.SF.GFP | LIVER | 6 | 141001757 | + | NM_018779    | Pde3a         | + |
| DMM 141 | Cdkn2a <sup>-/-</sup> _C57 | INS.SIN.LV.SF.GFP | LIVER | 6 | 142307246 | - | NM_183165    | Pyroxd1       | + |
| DMM140  | Cdkn2a <sup>-/-</sup> _C57 | INS.SIN.LV.SF.GFP | LIVER | 6 | 143005544 | - | NM_001109688 | 5730419I09Rik | - |
| DMM 141 | Cdkn2a <sup>-/-</sup> _C57 | INS.SIN.LV.SF.GFP | LIVER | 6 | 143141713 | + | NM_029250    | Etnk1         | + |
| DMM128  | Cdkn2a <sup>-/-</sup> _C57 | INS.SIN.LV.SF.GFP | LIVER | 6 | 143144809 | + | NM_029250    | Etnk1         | + |
| DMM140  | Cdkn2a <sup>-/-</sup> _C57 | INS.SIN.LV.SF.GFP | LIVER | 6 | 146534589 | - | NM_026218    | Fgfr1op2      | + |
| DMM141  | Cdkn2a <sup>-/-</sup> _C57 | INS.SIN.LV.SF.GFP | LIVER | 6 | 146599376 | - | NM_025315    | Med21         | + |
| DMM128  | Cdkn2a <sup>-/-</sup> _C57 | INS.SIN.LV.SF.GFP | LIVER | 6 | 148255152 | - | NM_198967    | Tmtc1         | - |
| DMM140  | Cdkn2a <sup>-/-</sup> _C57 | INS.SIN.LV.SF.GFP | LIVER | 6 | 148476942 | - | NM_198967    | Tmtc1         | - |
| DMM141  | Cdkn2a <sup>-/-</sup> _C57 | INS.SIN.LV.SF.GFP | LIVER | 6 | 148486768 | + | NM_198967    | Tmtc1         | - |
| DMM134  | Cdkn2a <sup>-/-</sup> _C57 | INS.SIN.LV.SF.GFP | LIVER | 6 | 148508830 | - | NM_198967    | Tmtc1         | - |
| DMM134  | Cdkn2a <sup>-/-</sup> _C57 | INS.SIN.LV.SF.GFP | LIVER | 6 | 148884660 | - | NM_019643    | Fam60a        | - |
| DMM141  | Cdkn2a <sup>-/-</sup> _C57 | INS.SIN.LV.SF.GFP | LIVER | 6 | 149142479 | + | NM_001113424 | Amn1          | - |
| DMM140  | Cdkn2a <sup>-/-</sup> _C57 | INS.SIN.LV.SF.GFP | LIVER | 6 | 149150959 | - | NM_001113424 | Amn1          | - |
| DMM128  | Cdkn2a <sup>-/-</sup> _C57 | INS.SIN.LV.SF.GFP | LIVER | 6 | 149280846 | + | NM_026054    | 2810474O19Rik | + |
| DMM140  | Cdkn2a <sup>-/-</sup> _C57 | INS.SIN.LV.SF.GFP | LIVER | 6 | 149283548 | - | NM_026054    | 2810474O19Rik | + |
| DMM140  | Cdkn2a <sup>-/-</sup> _C57 | INS.SIN.LV.SF.GFP | LIVER | 6 | 149295019 | + | NM_026054    | 2810474O19Rik | + |
| DMM141  | Cdkn2a <sup>-/-</sup> _C57 | INS.SIN.LV.SF.GFP | LIVER | 6 | 149401781 | + | NM_001112796 | Bicd1         | + |
| DMM 141 | Cdkn2a <sup>-/-</sup> _C57 | INS.SIN.LV.SF.GFP | LIVER | 6 | 149509743 | + | NM_001112796 | Bicd1         | + |
| DMM130  | Cdkn2a <sup>-/-</sup> _C57 | INS.SIN.LV.SF.GFP | LIVER | 7 | 3983702   | + | NM_001113474 | Lair1         | - |
| DMM140  | Cdkn2a <sup>-/-</sup> _C57 | INS.SIN.LV.SF.GFP | LIVER | 7 | 5056644   | - | NM_001145013 | Rfp14         | - |
| DMM 139 | Cdkn2a <sup>-/-</sup> _C57 | INS.SIN.LV.SF.GFP | LIVER | 7 | 6117852   | - | NM_001146024 | Zfp444        | + |
| DMM139  | Cdkn2a <sup>-/-</sup> _C57 | INS.SIN.LV.SF.GFP | LIVER | 7 | 6341865   | - | NM_175247    | Zfp28         | + |
| DMM 141 | Cdkn2a <sup>-/-</sup> _C57 | INS.SIN.LV.SF.GFP | LIVER | 7 | 7132047   | - | NM_146179    | Zfp418        | + |
| DMM140  | Cdkn2a <sup>-/-</sup> _C57 | INS.SIN.LV.SF.GFP | LIVER | 7 | 7245284   | + | NM_011334    | Clcn4-2       | - |
| DMM140  | Cdkn2a <sup>-/-</sup> _C57 | INS.SIN.LV.SF.GFP | LIVER | 7 | 13074429  | - | NM_026112    | Zfp606        | + |
| DMM134  | Cdkn2a <sup>-/-</sup> _C57 | INS.SIN.LV.SF.GFP | LIVER | 7 | 17193214  | + | NM_172739    | Grf1          | - |
| DMM130  | Cdkn2a <sup>-/-</sup> _C57 | INS.SIN.LV.SF.GFP | LIVER | 7 | 20146144  | + | NM_199149    | Lrrc68        | - |
| DMM128  | Cdkn2a <sup>-/-</sup> _C57 | INS.SIN.LV.SF.GFP | LIVER | 7 | 25690830  | + | NM_001130152 | Arhgef1       | + |
| DMM134  | Cdkn2a <sup>-/-</sup> _C57 | INS.SIN.LV.SF.GFP | LIVER | 7 | 30784103  | + | NM_001033355 | Zfp568        | + |
| DMM 140 | Cdkn2a <sup>-/-</sup> _C57 | INS.SIN.LV.SF.GFP | LIVER | 7 | 30950183  | + | NM_011980    | Zfp146        | - |
| DMM139  | Cdkn2a <sup>-/-</sup> _C57 | INS.SIN.LV.SF.GFP | LIVER | 7 | 31886835  | - | NM_001110252 | Hpn           | - |
| DMM 128 | Cdkn2a <sup>-/-</sup> _C57 | INS.SIN.LV.SF.GFP | LIVER | 7 | 35129421  | - | NM_025948    | Lsm14a        | - |

|         |                            |                   |       |   |          |   |              |               |   |
|---------|----------------------------|-------------------|-------|---|----------|---|--------------|---------------|---|
| DMM140  | Cdkn2a <sup>-/-</sup> _C57 | INS.SIN.LV.SF.GFP | LIVER | 7 | 35169644 | - | NM_025948    | Lsm14a        | - |
| DMM134  | Cdkn2a <sup>-/-</sup> _C57 | INS.SIN.LV.SF.GFP | LIVER | 7 | 35170518 | + | NM_025948    | Lsm14a        | - |
| DMM140  | Cdkn2a <sup>-/-</sup> _C57 | INS.SIN.LV.SF.GFP | LIVER | 7 | 36209618 | + | NM_028120    | Ccdc123       | + |
| DMM140  | Cdkn2a <sup>-/-</sup> _C57 | INS.SIN.LV.SF.GFP | LIVER | 7 | 37500222 | + | NM_172298    | Tshz3         | + |
| DMM140  | Cdkn2a <sup>-/-</sup> _C57 | INS.SIN.LV.SF.GFP | LIVER | 7 | 38707866 | + | NM_011274    | C80913        | - |
| DMM 142 | Cdkn2a <sup>-/-</sup> _C57 | INS.SIN.LV.SF.GFP | LIVER | 7 | 38791566 | + | NM_011274    | C80913        | - |
| DMM 142 | Cdkn2a <sup>-/-</sup> _C57 | INS.SIN.LV.SF.GFP | LIVER | 7 | 50620029 | - | NM_145581    | Siglec5       | + |
| DMM141  | Cdkn2a <sup>-/-</sup> _C57 | INS.SIN.LV.SF.GFP | LIVER | 7 | 51743283 | - | NM_197991    | 2310044H10Rik | - |
| DMM134  | Cdkn2a <sup>-/-</sup> _C57 | INS.SIN.LV.SF.GFP | LIVER | 7 | 52177828 | - | NM_001077264 | Ap2a1         | - |
| DMM140  | Cdkn2a <sup>-/-</sup> _C57 | INS.SIN.LV.SF.GFP | LIVER | 7 | 53872480 | + | NM_013789    | Sergef        | - |
| DMM146  | Cdkn2a <sup>-/-</sup> _C57 | INS.SIN.LV.SF.GFP | LIVER | 7 | 56050580 | - | NM_028031    | Zdhhc13       | + |
| DMM 142 | Cdkn2a <sup>-/-</sup> _C57 | INS.SIN.LV.SF.GFP | LIVER | 7 | 56072293 | + | NM_028031    | Zdhhc13       | + |
| DMM146  | Cdkn2a <sup>-/-</sup> _C57 | INS.SIN.LV.SF.GFP | LIVER | 7 | 59109109 | + | NM_001115087 | Fancf         | - |
| DMM140  | Cdkn2a <sup>-/-</sup> _C57 | INS.SIN.LV.SF.GFP | LIVER | 7 | 63054239 | + | NM_146190    | Tubgcp5       | + |
| DMM141  | Cdkn2a <sup>-/-</sup> _C57 | INS.SIN.LV.SF.GFP | LIVER | 7 | 66514582 | - | NM_001033962 | Ube3a         | + |
| DMM140  | Cdkn2a <sup>-/-</sup> _C57 | INS.SIN.LV.SF.GFP | LIVER | 7 | 66527041 | + | NM_173010    | Ube3a         | + |
| DMM 134 | Cdkn2a <sup>-/-</sup> _C57 | INS.SIN.LV.SF.GFP | LIVER | 7 | 66529215 | - | NM_173010    | Ube3a         | + |
| DMM139  | Cdkn2a <sup>-/-</sup> _C57 | INS.SIN.LV.SF.GFP | LIVER | 7 | 68090598 | - | NM_001082962 | Snrpn         | - |
| DMM141  | Cdkn2a <sup>-/-</sup> _C57 | INS.SIN.LV.SF.GFP | LIVER | 7 | 68220880 | + | NM_001082962 | Snrpn         | - |
| DMM128  | Cdkn2a <sup>-/-</sup> _C57 | INS.SIN.LV.SF.GFP | LIVER | 7 | 73219005 | + | NM_021336    | Snrpa1        | + |
| DMM141  | Cdkn2a <sup>-/-</sup> _C57 | INS.SIN.LV.SF.GFP | LIVER | 7 | 74429362 | + | NM_001033713 | Mef2a         | - |
| DMM140  | Cdkn2a <sup>-/-</sup> _C57 | INS.SIN.LV.SF.GFP | LIVER | 7 | 74480628 | + | NM_001033713 | Mef2a         | - |
| DMM 128 | Cdkn2a <sup>-/-</sup> _C57 | INS.SIN.LV.SF.GFP | LIVER | 7 | 74491391 | - | NM_001033713 | Mef2a         | - |
| DMM 134 | Cdkn2a <sup>-/-</sup> _C57 | INS.SIN.LV.SF.GFP | LIVER | 7 | 75197141 | - | NM_010513    | Igf1r         | + |
| DMM140  | Cdkn2a <sup>-/-</sup> _C57 | INS.SIN.LV.SF.GFP | LIVER | 7 | 75885816 | + | NM_001042592 | Arrdc4        | - |
| DMM140  | Cdkn2a <sup>-/-</sup> _C57 | INS.SIN.LV.SF.GFP | LIVER | 7 | 79420925 | - | NM_001024703 | Mctp2         | - |
| DMM141  | Cdkn2a <sup>-/-</sup> _C57 | INS.SIN.LV.SF.GFP | LIVER | 7 | 81627641 | - | NM_001038643 | Slco3a1       | - |
| DMM 141 | Cdkn2a <sup>-/-</sup> _C57 | INS.SIN.LV.SF.GFP | LIVER | 7 | 82803538 | + | NM_029332    | Akap13        | + |
| DMM 134 | Cdkn2a <sup>-/-</sup> _C57 | INS.SIN.LV.SF.GFP | LIVER | 7 | 83053953 | - | NM_001122780 | Klhl25        | + |
| DMM134  | Cdkn2a <sup>-/-</sup> _C57 | INS.SIN.LV.SF.GFP | LIVER | 7 | 86462110 | - | NM_018811    | Abhd2         | + |
| DMM140  | Cdkn2a <sup>-/-</sup> _C57 | INS.SIN.LV.SF.GFP | LIVER | 7 | 89799296 | + | NM_001159672 | Eftud1        | + |
| DMM141  | Cdkn2a <sup>-/-</sup> _C57 | INS.SIN.LV.SF.GFP | LIVER | 7 | 90544091 | + | NM_177695    | Tmc3          | + |
| DMM 142 | Cdkn2a <sup>-/-</sup> _C57 | INS.SIN.LV.SF.GFP | LIVER | 7 | 91252887 | - | NM_133722    | Fam108c       | - |
| DMM128  | Cdkn2a <sup>-/-</sup> _C57 | INS.SIN.LV.SF.GFP | LIVER | 7 | 91763465 | - | NM_022985    | Zfand6        | - |
| DMM140  | Cdkn2a <sup>-/-</sup> _C57 | INS.SIN.LV.SF.GFP | LIVER | 7 | 91807459 | - | NM_022985    | Zfand6        | - |

|         |                            |                   |       |   |           |   |              |          |   |
|---------|----------------------------|-------------------|-------|---|-----------|---|--------------|----------|---|
| DMM140  | Cdkn2a <sup>-/-</sup> _C57 | INS.SIN.LV.SF.GFP | LIVER | 7 | 91826067  | - | NM_022985    | Zfand6   | - |
| DMM140  | Cdkn2a <sup>-/-</sup> _C57 | INS.SIN.LV.SF.GFP | LIVER | 7 | 91829618  | + | NM_022985    | Zfand6   | - |
| DMM140  | Cdkn2a <sup>-/-</sup> _C57 | INS.SIN.LV.SF.GFP | LIVER | 7 | 94021440  | - | NM_001105189 | Vmn2r78  | + |
| DMM140  | Cdkn2a <sup>-/-</sup> _C57 | INS.SIN.LV.SF.GFP | LIVER | 7 | 95310965  | + | NM_001081414 | Grm5     | + |
| DMM 134 | Cdkn2a <sup>-/-</sup> _C57 | INS.SIN.LV.SF.GFP | LIVER | 7 | 95391568  | - | NM_009982    | Ctsc     | + |
| DMM140  | Cdkn2a <sup>-/-</sup> _C57 | INS.SIN.LV.SF.GFP | LIVER | 7 | 95431094  | + | NM_009982    | Ctsc     | + |
| DMM 142 | Cdkn2a <sup>-/-</sup> _C57 | INS.SIN.LV.SF.GFP | LIVER | 7 | 96476335  | + | NM_028343    | Tmem135  | - |
| DMM 142 | Cdkn2a <sup>-/-</sup> _C57 | INS.SIN.LV.SF.GFP | LIVER | 7 | 97620784  | + | NM_026734    | Tmem126b | - |
| DMM141  | Cdkn2a <sup>-/-</sup> _C57 | INS.SIN.LV.SF.GFP | LIVER | 7 | 98861778  | - | NM_011807    | Dlg2     | + |
| DMM130  | Cdkn2a <sup>-/-</sup> _C57 | INS.SIN.LV.SF.GFP | LIVER | 7 | 98867645  | + | NM_011807    | Dlg2     | + |
| DMM130  | Cdkn2a <sup>-/-</sup> _C57 | INS.SIN.LV.SF.GFP | LIVER | 7 | 98867723  | - | NM_011807    | Dlg2     | + |
| DMM139  | Cdkn2a <sup>-/-</sup> _C57 | INS.SIN.LV.SF.GFP | LIVER | 7 | 98875481  | + | NM_011807    | Dlg2     | + |
| DMM134  | Cdkn2a <sup>-/-</sup> _C57 | INS.SIN.LV.SF.GFP | LIVER | 7 | 99578234  | - | NM_011807    | Dlg2     | + |
| DMM128  | Cdkn2a <sup>-/-</sup> _C57 | INS.SIN.LV.SF.GFP | LIVER | 7 | 99814338  | + | NM_029078    | Pcf11    | - |
| DMM140  | Cdkn2a <sup>-/-</sup> _C57 | INS.SIN.LV.SF.GFP | LIVER | 7 | 100028449 | - | NM_028243    | Prcp     | + |
| DMM146  | Cdkn2a <sup>-/-</sup> _C57 | INS.SIN.LV.SF.GFP | LIVER | 7 | 100048144 | - | NM_028243    | Prcp     | + |
| DMM141  | Cdkn2a <sup>-/-</sup> _C57 | INS.SIN.LV.SF.GFP | LIVER | 7 | 104500874 | - | NM_001039039 | Kctd21   | + |
| DMM 132 | Cdkn2a <sup>-/-</sup> _C57 | INS.SIN.LV.SF.GFP | LIVER | 7 | 104878329 | - | NM_175105    | Aqp11    | - |
| DMM134  | Cdkn2a <sup>-/-</sup> _C57 | INS.SIN.LV.SF.GFP | LIVER | 7 | 105014618 | + | NM_011035    | Pak1     | + |
| DMM135  | Cdkn2a <sup>-/-</sup> _C57 | INS.SIN.LV.SF.GFP | LIVER | 7 | 107263960 | - | NM_133692    | Pold3    | - |
| DMM141  | Cdkn2a <sup>-/-</sup> _C57 | INS.SIN.LV.SF.GFP | LIVER | 7 | 107890701 | - | NM_178764    | Fam168a  | + |
| DMM141  | Cdkn2a <sup>-/-</sup> _C57 | INS.SIN.LV.SF.GFP | LIVER | 7 | 108233807 | - | NM_001146010 | Fchs2    | + |
| DMM141  | Cdkn2a <sup>-/-</sup> _C57 | INS.SIN.LV.SF.GFP | LIVER | 7 | 108937096 | + | NM_009191    | Clpb     | + |
| DMM146  | Cdkn2a <sup>-/-</sup> _C57 | INS.SIN.LV.SF.GFP | LIVER | 7 | 109197570 | - | NM_029211    | Rnf121   | - |
| DMM140  | Cdkn2a <sup>-/-</sup> _C57 | INS.SIN.LV.SF.GFP | LIVER | 7 | 109480643 | - | NM_009287    | Stim1    | + |
| DMM140  | Cdkn2a <sup>-/-</sup> _C57 | INS.SIN.LV.SF.GFP | LIVER | 7 | 110701154 | - | NM_147100    | Olfr614  | + |
| DMM141  | Cdkn2a <sup>-/-</sup> _C57 | INS.SIN.LV.SF.GFP | LIVER | 7 | 111368763 | - | NM_001013616 | Trim6    | + |
| DMM140  | Cdkn2a <sup>-/-</sup> _C57 | INS.SIN.LV.SF.GFP | LIVER | 7 | 111546324 | + | NM_009099    | Trim30   | - |
| DMM141  | Cdkn2a <sup>-/-</sup> _C57 | INS.SIN.LV.SF.GFP | LIVER | 7 | 111577064 | + | NM_009099    | Trim30   | - |
| DMM 142 | Cdkn2a <sup>-/-</sup> _C57 | INS.SIN.LV.SF.GFP | LIVER | 7 | 113773913 | + | NM_146453    | Olfr693  | - |
| DMM 140 | Cdkn2a <sup>-/-</sup> _C57 | INS.SIN.LV.SF.GFP | LIVER | 7 | 113774405 | + | NM_146453    | Olfr693  | - |
| DMM128  | Cdkn2a <sup>-/-</sup> _C57 | INS.SIN.LV.SF.GFP | LIVER | 7 | 114773307 | - | NM_008905    | Ppfbp2   | + |
| DMM128  | Cdkn2a <sup>-/-</sup> _C57 | INS.SIN.LV.SF.GFP | LIVER | 7 | 114779299 | + | NM_008905    | Ppfbp2   | + |
| DMM146  | Cdkn2a <sup>-/-</sup> _C57 | INS.SIN.LV.SF.GFP | LIVER | 7 | 114795448 | + | NM_008905    | Ppfbp2   | + |
| DMM128  | Cdkn2a <sup>-/-</sup> _C57 | INS.SIN.LV.SF.GFP | LIVER | 7 | 114829149 | + | NM_008905    | Ppfbp2   | + |

|         |                            |                   |       |   |           |   |              |               |   |
|---------|----------------------------|-------------------|-------|---|-----------|---|--------------|---------------|---|
| DMM141  | Cdkn2a <sup>-/-</sup> _C57 | INS.SIN.LV.SF.GFP | LIVER | 7 | 116089113 | - | NM_025344    | Eif3f         | + |
| DMM140  | Cdkn2a <sup>-/-</sup> _C57 | INS.SIN.LV.SF.GFP | LIVER | 7 | 117275397 | + | NM_009516    | Wee1          | + |
| DMM141  | Cdkn2a <sup>-/-</sup> _C57 | INS.SIN.LV.SF.GFP | LIVER | 7 | 118528361 | - | NM_173739    | Galnt4        | - |
| DMM141  | Cdkn2a <sup>-/-</sup> _C57 | INS.SIN.LV.SF.GFP | LIVER | 7 | 120477763 | - | NM_133700    | Btbd10        | - |
| DMM139  | Cdkn2a <sup>-/-</sup> _C57 | INS.SIN.LV.SF.GFP | LIVER | 7 | 120498556 | + | NM_133700    | Btbd10        | - |
| DMM146  | Cdkn2a <sup>-/-</sup> _C57 | INS.SIN.LV.SF.GFP | LIVER | 7 | 121624147 | + | NM_011055    | Pde3b         | + |
| DMM140  | Cdkn2a <sup>-/-</sup> _C57 | INS.SIN.LV.SF.GFP | LIVER | 7 | 121696312 | - | NM_177382    | Cyp2r1        | - |
| DMM146  | Cdkn2a <sup>-/-</sup> _C57 | INS.SIN.LV.SF.GFP | LIVER | 7 | 123692041 | + | NM_001130479 | Nucb2         | + |
| DMM 141 | Cdkn2a <sup>-/-</sup> _C57 | INS.SIN.LV.SF.GFP | LIVER | 7 | 125326336 | - | NM_001031814 | Sngl          | - |
| DMM140  | Cdkn2a <sup>-/-</sup> _C57 | INS.SIN.LV.SF.GFP | LIVER | 7 | 129673465 | + | NM_008855    | Prkcb         | + |
| DMM 134 | Cdkn2a <sup>-/-</sup> _C57 | INS.SIN.LV.SF.GFP | LIVER | 7 | 130293017 | + | NM_144925    | Tnrc6a        | + |
| DMM141  | Cdkn2a <sup>-/-</sup> _C57 | INS.SIN.LV.SF.GFP | LIVER | 7 | 130567482 | - | NM_025304    | Lcmt1         | + |
| DMM139  | Cdkn2a <sup>-/-</sup> _C57 | INS.SIN.LV.SF.GFP | LIVER | 7 | 132854814 | - | NM_001081022 | D430042O09Rik | + |
| DMM 142 | Cdkn2a <sup>-/-</sup> _C57 | INS.SIN.LV.SF.GFP | LIVER | 7 | 140848474 | + | NM_145995    | 2700050L05Rik | + |
| DMM 128 | Cdkn2a <sup>-/-</sup> _C57 | INS.SIN.LV.SF.GFP | LIVER | 7 | 140954329 | - | NM_133941    | Dhx32         | - |
| DMM141  | Cdkn2a <sup>-/-</sup> _C57 | INS.SIN.LV.SF.GFP | LIVER | 7 | 142792888 | - | NM_011212    | Ptpre         | + |
| DMM140  | Cdkn2a <sup>-/-</sup> _C57 | INS.SIN.LV.SF.GFP | LIVER | 7 | 150731304 | + | NM_008672    | Nap114        | - |
| DMM140  | Cdkn2a <sup>-/-</sup> _C57 | INS.SIN.LV.SF.GFP | LIVER | 7 | 152166191 | - | NM_007631    | Ccnd1         | - |
| DMM139  | Cdkn2a <sup>-/-</sup> _C57 | INS.SIN.LV.SF.GFP | LIVER | 8 | 4305449   | - | NM_010485    | Elavl1        | - |
| DMM140  | Cdkn2a <sup>-/-</sup> _C57 | INS.SIN.LV.SF.GFP | LIVER | 8 | 6136870   | - | NM_011388    | Slc10a2       | - |
| DMM133  | Cdkn2a <sup>-/-</sup> _C57 | INS.SIN.LV.SF.GFP | LIVER | 8 | 6143826   | + | NM_011388    | Slc10a2       | - |
| DMM 132 | Cdkn2a <sup>-/-</sup> _C57 | INS.SIN.LV.SF.GFP | LIVER | 8 | 8635328   | - | NM_010111    | Efnb2         | - |
| DMM141  | Cdkn2a <sup>-/-</sup> _C57 | INS.SIN.LV.SF.GFP | LIVER | 8 | 9399363   | - | NM_173446    | Fam155a       | - |
| DMM 141 | Cdkn2a <sup>-/-</sup> _C57 | INS.SIN.LV.SF.GFP | LIVER | 8 | 9973542   | + | NM_176953    | Lig4          | - |
| DMM140  | Cdkn2a <sup>-/-</sup> _C57 | INS.SIN.LV.SF.GFP | LIVER | 8 | 12660992  | + | NM_198031    | Tubgcp3       | - |
| DMM140  | Cdkn2a <sup>-/-</sup> _C57 | INS.SIN.LV.SF.GFP | LIVER | 8 | 18864808  | - | NM_026792    | Agpat5        | + |
| DMM133  | Cdkn2a <sup>-/-</sup> _C57 | INS.SIN.LV.SF.GFP | LIVER | 8 | 23740549  | - | NM_011130    | Polb          | - |
| DMM139  | Cdkn2a <sup>-/-</sup> _C57 | INS.SIN.LV.SF.GFP | LIVER | 8 | 23997298  | + | NM_001081149 | Myst3         | + |
| DMM128  | Cdkn2a <sup>-/-</sup> _C57 | INS.SIN.LV.SF.GFP | LIVER | 8 | 24361986  | - | NM_001042484 | Golga7        | - |
| DMM 128 | Cdkn2a <sup>-/-</sup> _C57 | INS.SIN.LV.SF.GFP | LIVER | 8 | 25537435  | - | NM_026931    | 1810011O10Rik | - |
| DMM 132 | Cdkn2a <sup>-/-</sup> _C57 | INS.SIN.LV.SF.GFP | LIVER | 8 | 27142384  | + | NM_207659    | Hook3         | - |
| DMM140  | Cdkn2a <sup>-/-</sup> _C57 | INS.SIN.LV.SF.GFP | LIVER | 8 | 27158300  | - | NM_207659    | Hook3         | - |
| DMM141  | Cdkn2a <sup>-/-</sup> _C57 | INS.SIN.LV.SF.GFP | LIVER | 8 | 27555636  | - | NM_199042    | Thap1         | + |
| DMM 131 | Cdkn2a <sup>-/-</sup> _C57 | INS.SIN.LV.SF.GFP | LIVER | 8 | 31841395  | + | NM_025869    | Dusp26        | + |
| DMM128  | Cdkn2a <sup>-/-</sup> _C57 | INS.SIN.LV.SF.GFP | LIVER | 8 | 34517524  | + | NM_001098233 | Purg          | + |



|         |                            |                   |       |   |          |   |              |          |   |
|---------|----------------------------|-------------------|-------|---|----------|---|--------------|----------|---|
| DMM146  | Cdkn2a <sup>-/-</sup> _C57 | INS.SIN.LV.SF.GFP | LIVER | 8 | 35973122 | - | NM_175091    | Tnks     | - |
| DMM 134 | Cdkn2a <sup>-/-</sup> _C57 | INS.SIN.LV.SF.GFP | LIVER | 8 | 36543642 | + | NM_026067    | Erl1     | - |
| DMM134  | Cdkn2a <sup>-/-</sup> _C57 | INS.SIN.LV.SF.GFP | LIVER | 8 | 38082640 | - | NM_001039220 | AI429214 | + |
| DMM128  | Cdkn2a <sup>-/-</sup> _C57 | INS.SIN.LV.SF.GFP | LIVER | 8 | 40120650 | + | NM_030254    | Tusc3    | + |
| DMM133  | Cdkn2a <sup>-/-</sup> _C57 | INS.SIN.LV.SF.GFP | LIVER | 8 | 40144979 | + | NM_030254    | Tusc3    | + |
| DMM 142 | Cdkn2a <sup>-/-</sup> _C57 | INS.SIN.LV.SF.GFP | LIVER | 8 | 40672941 | + | NM_001113326 | Msr1     | - |
| DMM 142 | Cdkn2a <sup>-/-</sup> _C57 | INS.SIN.LV.SF.GFP | LIVER | 8 | 40745771 | + | NM_001113326 | Msr1     | - |
| DMM 141 | Cdkn2a <sup>-/-</sup> _C57 | INS.SIN.LV.SF.GFP | LIVER | 8 | 41113353 | + | NM_030610    | Fgf20    | - |
| DMM140  | Cdkn2a <sup>-/-</sup> _C57 | INS.SIN.LV.SF.GFP | LIVER | 8 | 41404816 | - | NM_030610    | Fgf20    | - |
| DMM140  | Cdkn2a <sup>-/-</sup> _C57 | INS.SIN.LV.SF.GFP | LIVER | 8 | 41405612 | + | NM_030610    | Fgf20    | - |
| DMM134  | Cdkn2a <sup>-/-</sup> _C57 | INS.SIN.LV.SF.GFP | LIVER | 8 | 41431653 | + | NM_030610    | Fgf20    | - |
| DMM140  | Cdkn2a <sup>-/-</sup> _C57 | INS.SIN.LV.SF.GFP | LIVER | 8 | 42337583 | - | NM_023662    | Pcm1     | + |
| DMM128  | Cdkn2a <sup>-/-</sup> _C57 | INS.SIN.LV.SF.GFP | LIVER | 8 | 42364095 | - | NM_023662    | Pcm1     | + |
| DMM141  | Cdkn2a <sup>-/-</sup> _C57 | INS.SIN.LV.SF.GFP | LIVER | 8 | 42392458 | - | NM_023662    | Pcm1     | + |
| DMM140  | Cdkn2a <sup>-/-</sup> _C57 | INS.SIN.LV.SF.GFP | LIVER | 8 | 47709157 | - | NM_009810    | Casp3    | + |
| DMM 149 | Cdkn2a <sup>-/-</sup> _C57 | INS.SIN.LV.SF.GFP | LIVER | 8 | 47835283 | + | NM_008391    | Irf2     | + |
| DMM134  | Cdkn2a <sup>-/-</sup> _C57 | INS.SIN.LV.SF.GFP | LIVER | 8 | 48752864 | + | NM_023503    | Ing2     | - |
| DMM128  | Cdkn2a <sup>-/-</sup> _C57 | INS.SIN.LV.SF.GFP | LIVER | 8 | 49022599 | - | NM_133791    | Wwc2     | - |
| DMM140  | Cdkn2a <sup>-/-</sup> _C57 | INS.SIN.LV.SF.GFP | LIVER | 8 | 49338863 | + | NM_001145937 | Odz3     | - |
| DMM141  | Cdkn2a <sup>-/-</sup> _C57 | INS.SIN.LV.SF.GFP | LIVER | 8 | 54512937 | + | NM_001005847 | Aga      | + |
| DMM141  | Cdkn2a <sup>-/-</sup> _C57 | INS.SIN.LV.SF.GFP | LIVER | 8 | 54531907 | - | NM_001005847 | Aga      | + |
| DMM139  | Cdkn2a <sup>-/-</sup> _C57 | INS.SIN.LV.SF.GFP | LIVER | 8 | 54564823 | + | NM_001005847 | Aga      | + |
| DMM140  | Cdkn2a <sup>-/-</sup> _C57 | INS.SIN.LV.SF.GFP | LIVER | 8 | 54575858 | + | NM_001005847 | Aga      | + |
| DMM140  | Cdkn2a <sup>-/-</sup> _C57 | INS.SIN.LV.SF.GFP | LIVER | 8 | 54578793 | + | NM_001005847 | Aga      | + |
| DMM140  | Cdkn2a <sup>-/-</sup> _C57 | INS.SIN.LV.SF.GFP | LIVER | 8 | 54695896 | - | NM_146208    | Neil3    | - |
| DMM 128 | Cdkn2a <sup>-/-</sup> _C57 | INS.SIN.LV.SF.GFP | LIVER | 8 | 54720468 | - | NM_146208    | Neil3    | - |
| DMM140  | Cdkn2a <sup>-/-</sup> _C57 | INS.SIN.LV.SF.GFP | LIVER | 8 | 54721087 | + | NM_146208    | Neil3    | - |
| DMM139  | Cdkn2a <sup>-/-</sup> _C57 | INS.SIN.LV.SF.GFP | LIVER | 8 | 55617860 | - | NM_029701    | Spes3    | - |
| DMM140  | Cdkn2a <sup>-/-</sup> _C57 | INS.SIN.LV.SF.GFP | LIVER | 8 | 58682973 | - | NM_080438    | Glra3    | + |
| DMM134  | Cdkn2a <sup>-/-</sup> _C57 | INS.SIN.LV.SF.GFP | LIVER | 8 | 58779523 | + | NM_008278    | Hpgd     | + |
| DMM 134 | Cdkn2a <sup>-/-</sup> _C57 | INS.SIN.LV.SF.GFP | LIVER | 8 | 58782331 | - | NM_008278    | Hpgd     | + |
| DMM 134 | Cdkn2a <sup>-/-</sup> _C57 | INS.SIN.LV.SF.GFP | LIVER | 8 | 58870210 | + | NM_008278    | Hpgd     | + |
| DMM146  | Cdkn2a <sup>-/-</sup> _C57 | INS.SIN.LV.SF.GFP | LIVER | 8 | 59993659 | - | NM_008252    | Hmgb2    | + |
| DMM141  | Cdkn2a <sup>-/-</sup> _C57 | INS.SIN.LV.SF.GFP | LIVER | 8 | 60142921 | + | NM_144731    | Galnt7   | - |
| DMM140  | Cdkn2a <sup>-/-</sup> _C57 | INS.SIN.LV.SF.GFP | LIVER | 8 | 63546743 | + | NM_175089    | Nek1     | + |

|         |                            |                   |       |   |          |   |              |               |   |
|---------|----------------------------|-------------------|-------|---|----------|---|--------------|---------------|---|
| DMM141  | Cdkn2a <sup>-/-</sup> _C57 | INS.SIN.LV.SF.GFP | LIVER | 8 | 64039006 | - | NM_001081390 | Palld         | - |
| DMM 142 | Cdkn2a <sup>-/-</sup> _C57 | INS.SIN.LV.SF.GFP | LIVER | 8 | 65281161 | + | NM_023689    | Spock3        | + |
| DMM140  | Cdkn2a <sup>-/-</sup> _C57 | INS.SIN.LV.SF.GFP | LIVER | 8 | 66891926 | - | NM_013494    | Cpe           | - |
| DMM128  | Cdkn2a <sup>-/-</sup> _C57 | INS.SIN.LV.SF.GFP | LIVER | 8 | 70212312 | - | NM_027626    | Psd3          | - |
| DMM 149 | Cdkn2a <sup>-/-</sup> _C57 | INS.SIN.LV.SF.GFP | LIVER | 8 | 70327963 | - | NM_027626    | Psd3          | - |
| DMM140  | Cdkn2a <sup>-/-</sup> _C57 | INS.SIN.LV.SF.GFP | LIVER | 8 | 70374639 | + | NM_030263    | Psd3          | - |
| DMM130  | Cdkn2a <sup>-/-</sup> _C57 | INS.SIN.LV.SF.GFP | LIVER | 8 | 70389649 | + | NM_030263    | Psd3          | - |
| DMM130  | Cdkn2a <sup>-/-</sup> _C57 | INS.SIN.LV.SF.GFP | LIVER | 8 | 70389796 | - | NM_030263    | Psd3          | - |
| DMM 134 | Cdkn2a <sup>-/-</sup> _C57 | INS.SIN.LV.SF.GFP | LIVER | 8 | 70390015 | - | NM_030263    | Psd3          | - |
| DMM140  | Cdkn2a <sup>-/-</sup> _C57 | INS.SIN.LV.SF.GFP | LIVER | 8 | 70676749 | - | NM_028182    | Sh2d4a        | + |
| DMM 134 | Cdkn2a <sup>-/-</sup> _C57 | INS.SIN.LV.SF.GFP | LIVER | 8 | 70716170 | - | NM_028182    | Sh2d4a        | + |
| DMM 134 | Cdkn2a <sup>-/-</sup> _C57 | INS.SIN.LV.SF.GFP | LIVER | 8 | 71200377 | + | NM_172753    | Csgalnact1    | - |
| DMM141  | Cdkn2a <sup>-/-</sup> _C57 | INS.SIN.LV.SF.GFP | LIVER | 8 | 72563764 | - | NM_028993    | 9130404D08Rik | - |
| DMM128  | Cdkn2a <sup>-/-</sup> _C57 | INS.SIN.LV.SF.GFP | LIVER | 8 | 73169052 | + | NM_023217    | Pgpep1        | - |
| DMM141  | Cdkn2a <sup>-/-</sup> _C57 | INS.SIN.LV.SF.GFP | LIVER | 8 | 75403059 | + | NM_010687    | Large         | - |
| DMM141  | Cdkn2a <sup>-/-</sup> _C57 | INS.SIN.LV.SF.GFP | LIVER | 8 | 75857923 | + | NM_010687    | Large         | - |
| DMM 137 | Cdkn2a <sup>-/-</sup> _C57 | INS.SIN.LV.SF.GFP | LIVER | 8 | 76403071 | - | NM_010687    | Large         | - |
| DMM140  | Cdkn2a <sup>-/-</sup> _C57 | INS.SIN.LV.SF.GFP | LIVER | 8 | 77528276 | - | NM_178017    | Hmgxb4        | + |
| DMM 142 | Cdkn2a <sup>-/-</sup> _C57 | INS.SIN.LV.SF.GFP | LIVER | 8 | 77653342 | - | NM_008566    | Mcm5          | + |
| DMM133  | Cdkn2a <sup>-/-</sup> _C57 | INS.SIN.LV.SF.GFP | LIVER | 8 | 79819211 | + | NM_030113    | Arhgap10      | - |
| DMM146  | Cdkn2a <sup>-/-</sup> _C57 | INS.SIN.LV.SF.GFP | LIVER | 8 | 84311140 | + | NM_001024617 | Inpp4b        | + |
| DMM 134 | Cdkn2a <sup>-/-</sup> _C57 | INS.SIN.LV.SF.GFP | LIVER | 8 | 87568546 | + | NM_001122843 | Tnpo2         | + |
| DMM 134 | Cdkn2a <sup>-/-</sup> _C57 | INS.SIN.LV.SF.GFP | LIVER | 8 | 87811574 | - | NM_022997    | Vps35         | - |
| DMM 134 | Cdkn2a <sup>-/-</sup> _C57 | INS.SIN.LV.SF.GFP | LIVER | 8 | 87937904 | + | NM_025722    | 4921524J17Rik | - |
| DMM 128 | Cdkn2a <sup>-/-</sup> _C57 | INS.SIN.LV.SF.GFP | LIVER | 8 | 88066993 | + | NM_019794    | Dnaja2        | - |
| DMM142  | Cdkn2a <sup>-/-</sup> _C57 | INS.SIN.LV.SF.GFP | LIVER | 8 | 88290394 | + | NM_028007    | Itfg1         | - |
| DMM140  | Cdkn2a <sup>-/-</sup> _C57 | INS.SIN.LV.SF.GFP | LIVER | 8 | 88536827 | + | NM_199446    | Phkb          | + |
| DMM141  | Cdkn2a <sup>-/-</sup> _C57 | INS.SIN.LV.SF.GFP | LIVER | 8 | 91223258 | - | NM_001128169 | Cyld          | + |
| DMM141  | Cdkn2a <sup>-/-</sup> _C57 | INS.SIN.LV.SF.GFP | LIVER | 8 | 91227461 | + | NM_001128169 | Cyld          | + |
| DMM134  | Cdkn2a <sup>-/-</sup> _C57 | INS.SIN.LV.SF.GFP | LIVER | 8 | 93481415 | - | NM_177224    | Chd9          | + |
| DMM141  | Cdkn2a <sup>-/-</sup> _C57 | INS.SIN.LV.SF.GFP | LIVER | 8 | 93755471 | - | NM_173431    | Rpgrip11      | - |
| DMM140  | Cdkn2a <sup>-/-</sup> _C57 | INS.SIN.LV.SF.GFP | LIVER | 8 | 94034572 | - | NM_011936    | Fto           | + |
| DMM146  | Cdkn2a <sup>-/-</sup> _C57 | INS.SIN.LV.SF.GFP | LIVER | 8 | 95428210 | - | NM_173014    | Lpcat2        | + |
| DMM140  | Cdkn2a <sup>-/-</sup> _C57 | INS.SIN.LV.SF.GFP | LIVER | 8 | 95436932 | - | NM_173014    | Lpcat2        | + |
| DMM 141 | Cdkn2a <sup>-/-</sup> _C57 | INS.SIN.LV.SF.GFP | LIVER | 8 | 96494025 | + | NM_010308    | Gnao1         | + |

|         |                            |                   |       |   |           |   |              |               |   |
|---------|----------------------------|-------------------|-------|---|-----------|---|--------------|---------------|---|
| DMM 134 | Cdkn2a <sup>-/-</sup> _C57 | INS.SIN.LV.SF.GFP | LIVER | 8 | 96962827  | + | NM_022331    | Herpud1       | + |
| DMM133  | Cdkn2a <sup>-/-</sup> _C57 | INS.SIN.LV.SF.GFP | LIVER | 8 | 105162477 | + | NM_009866    | Cdh11         | - |
| DMM141  | Cdkn2a <sup>-/-</sup> _C57 | INS.SIN.LV.SF.GFP | LIVER | 8 | 106626893 | + | NM_009868    | Cdh5          | + |
| DMM 134 | Cdkn2a <sup>-/-</sup> _C57 | INS.SIN.LV.SF.GFP | LIVER | 8 | 108752116 | - | NM_145404    | Prmt7         | + |
| DMM140  | Cdkn2a <sup>-/-</sup> _C57 | INS.SIN.LV.SF.GFP | LIVER | 8 | 111543240 | - | NM_007496    | Zfx3          | + |
| DMM 135 | Cdkn2a <sup>-/-</sup> _C57 | INS.SIN.LV.SF.GFP | LIVER | 8 | 111545267 | + | NM_007496    | Zfx3          | + |
| DMM 135 | Cdkn2a <sup>-/-</sup> _C57 | INS.SIN.LV.SF.GFP | LIVER | 8 | 111545372 | - | NM_007496    | Zfx3          | + |
| DMM128  | Cdkn2a <sup>-/-</sup> _C57 | INS.SIN.LV.SF.GFP | LIVER | 8 | 112096472 | + | NM_175646    | Txn14b        | + |
| DMM134  | Cdkn2a <sup>-/-</sup> _C57 | INS.SIN.LV.SF.GFP | LIVER | 8 | 112377683 | + | NM_009677    | Ap1g1         | + |
| DMM141  | Cdkn2a <sup>-/-</sup> _C57 | INS.SIN.LV.SF.GFP | LIVER | 8 | 114477988 | + | NM_026693    | Gabarapl2     | + |
| DMM 128 | Cdkn2a <sup>-/-</sup> _C57 | INS.SIN.LV.SF.GFP | LIVER | 8 | 119254537 | + | NM_029441    | Cdyl2         | - |
| DMM 134 | Cdkn2a <sup>-/-</sup> _C57 | INS.SIN.LV.SF.GFP | LIVER | 8 | 122377933 | + | NM_146219    | Klh136        | + |
| DMM 134 | Cdkn2a <sup>-/-</sup> _C57 | INS.SIN.LV.SF.GFP | LIVER | 8 | 125787077 | + | NM_020497    | Zfp276        | + |
| DMM146  | Cdkn2a <sup>-/-</sup> _C57 | INS.SIN.LV.SF.GFP | LIVER | 8 | 130341420 | - | NM_033620    | Pard3         | + |
| DMM 133 | Cdkn2a <sup>-/-</sup> _C57 | INS.SIN.LV.SF.GFP | LIVER | 9 | 3000157   | + | NM_026303    | Alkbh8        | + |
| DMM 141 | Cdkn2a <sup>-/-</sup> _C57 | INS.SIN.LV.SF.GFP | LIVER | 9 | 3026487   | + | NM_026303    | Alkbh8        | + |
| DMM146  | Cdkn2a <sup>-/-</sup> _C57 | INS.SIN.LV.SF.GFP | LIVER | 9 | 3452242   | - | NM_027545    | Cwf19l2       | + |
| DMM128  | Cdkn2a <sup>-/-</sup> _C57 | INS.SIN.LV.SF.GFP | LIVER | 9 | 5312740   | - | NM_007609    | Casp4         | + |
| DMM139  | Cdkn2a <sup>-/-</sup> _C57 | INS.SIN.LV.SF.GFP | LIVER | 9 | 5324619   | - | NM_007609    | Casp4         | + |
| DMM128  | Cdkn2a <sup>-/-</sup> _C57 | INS.SIN.LV.SF.GFP | LIVER | 9 | 7831297   | + | NM_007465    | Birc2         | - |
| DMM140  | Cdkn2a <sup>-/-</sup> _C57 | INS.SIN.LV.SF.GFP | LIVER | 9 | 9034936   | + | NM_027823    | 9030420J04Rik | - |
| DMM 141 | Cdkn2a <sup>-/-</sup> _C57 | INS.SIN.LV.SF.GFP | LIVER | 9 | 9154315   | + | NM_027823    | 9030420J04Rik | - |
| DMM141  | Cdkn2a <sup>-/-</sup> _C57 | INS.SIN.LV.SF.GFP | LIVER | 9 | 9637127   | - | NM_001033359 | Cntn5         | - |
| DMM146  | Cdkn2a <sup>-/-</sup> _C57 | INS.SIN.LV.SF.GFP | LIVER | 9 | 9691593   | + | NM_001033359 | Cntn5         | - |
| DMM140  | Cdkn2a <sup>-/-</sup> _C57 | INS.SIN.LV.SF.GFP | LIVER | 9 | 13392511  | + | NM_001013813 | Maml2         | + |
| DMM140  | Cdkn2a <sup>-/-</sup> _C57 | INS.SIN.LV.SF.GFP | LIVER | 9 | 13594840  | + | NM_023858    | Mttr2         | + |
| DMM133  | Cdkn2a <sup>-/-</sup> _C57 | INS.SIN.LV.SF.GFP | LIVER | 9 | 14370803  | - | NM_001081395 | Amotl1        | - |
| DMM140  | Cdkn2a <sup>-/-</sup> _C57 | INS.SIN.LV.SF.GFP | LIVER | 9 | 15103180  | + | NM_133732    | 4931406C07Rik | - |
| DMM140  | Cdkn2a <sup>-/-</sup> _C57 | INS.SIN.LV.SF.GFP | LIVER | 9 | 15104769  | - | NM_133732    | 4931406C07Rik | - |
| DMM141  | Cdkn2a <sup>-/-</sup> _C57 | INS.SIN.LV.SF.GFP | LIVER | 9 | 15967915  | - | NM_001080814 | Fat3          | - |
| DMM141  | Cdkn2a <sup>-/-</sup> _C57 | INS.SIN.LV.SF.GFP | LIVER | 9 | 16799822  | + | NM_001080814 | Fat3          | - |
| DMM139  | Cdkn2a <sup>-/-</sup> _C57 | INS.SIN.LV.SF.GFP | LIVER | 9 | 18122281  | + | NM_025844    | Chordc1       | + |
| DMM140  | Cdkn2a <sup>-/-</sup> _C57 | INS.SIN.LV.SF.GFP | LIVER | 9 | 22113451  | - | NM_145612    | Zfp810        | - |
| DMM139  | Cdkn2a <sup>-/-</sup> _C57 | INS.SIN.LV.SF.GFP | LIVER | 9 | 24936701  | + | NM_020586    | Herpud2       | - |
| DMM140  | Cdkn2a <sup>-/-</sup> _C57 | INS.SIN.LV.SF.GFP | LIVER | 9 | 24949712  | + | NM_020586    | Herpud2       | - |

|         |                            |                   |       |   |          |   |              |               |   |
|---------|----------------------------|-------------------|-------|---|----------|---|--------------|---------------|---|
| DMM140  | Cdkn2a <sup>-/-</sup> _C57 | INS.SIN.LV.SF.GFP | LIVER | 9 | 28440379 | + | NM_177906    | Opcml         | + |
| DMM 134 | Cdkn2a <sup>-/-</sup> _C57 | INS.SIN.LV.SF.GFP | LIVER | 9 | 29930782 | - | NM_172290    | Ntm           | - |
| DMM140  | Cdkn2a <sup>-/-</sup> _C57 | INS.SIN.LV.SF.GFP | LIVER | 9 | 31012695 | + | NM_001102455 | Aplp2         | - |
| DMM134  | Cdkn2a <sup>-/-</sup> _C57 | INS.SIN.LV.SF.GFP | LIVER | 9 | 32484101 | - | NM_001038642 | Ets1          | + |
| DMM141  | Cdkn2a <sup>-/-</sup> _C57 | INS.SIN.LV.SF.GFP | LIVER | 9 | 33278443 | + | NM_001038642 | Ets1          | + |
| DMM 134 | Cdkn2a <sup>-/-</sup> _C57 | INS.SIN.LV.SF.GFP | LIVER | 9 | 34877595 | + | NM_009178    | St3gal4       | - |
| DMM 149 | Cdkn2a <sup>-/-</sup> _C57 | INS.SIN.LV.SF.GFP | LIVER | 9 | 35113050 | - | NM_028040    | Rpusd4        | + |
| DMM140  | Cdkn2a <sup>-/-</sup> _C57 | INS.SIN.LV.SF.GFP | LIVER | 9 | 37438221 | + | NM_011734    | Siae          | + |
| DMM134  | Cdkn2a <sup>-/-</sup> _C57 | INS.SIN.LV.SF.GFP | LIVER | 9 | 38533338 | + | NM_001145957 | Vwa5a         | + |
| DMM141  | Cdkn2a <sup>-/-</sup> _C57 | INS.SIN.LV.SF.GFP | LIVER | 9 | 50391924 | + | NM_008360    | Il18          | + |
| DMM141  | Cdkn2a <sup>-/-</sup> _C57 | INS.SIN.LV.SF.GFP | LIVER | 9 | 50811033 | + | NM_178710    | Sik2          | - |
| DMM140  | Cdkn2a <sup>-/-</sup> _C57 | INS.SIN.LV.SF.GFP | LIVER | 9 | 51974876 | - | NM_001104616 | Rdx           | + |
| DMM146  | Cdkn2a <sup>-/-</sup> _C57 | INS.SIN.LV.SF.GFP | LIVER | 9 | 52980511 | + | NM_029936    | Ddx10         | - |
| DMM128  | Cdkn2a <sup>-/-</sup> _C57 | INS.SIN.LV.SF.GFP | LIVER | 9 | 53044903 | + | NM_029936    | Ddx10         | - |
| DMM141  | Cdkn2a <sup>-/-</sup> _C57 | INS.SIN.LV.SF.GFP | LIVER | 9 | 54427733 | - | NM_029573    | Idh3a         | + |
| DMM141  | Cdkn2a <sup>-/-</sup> _C57 | INS.SIN.LV.SF.GFP | LIVER | 9 | 54427738 | - | NM_029573    | Idh3a         | + |
| DMM140  | Cdkn2a <sup>-/-</sup> _C57 | INS.SIN.LV.SF.GFP | LIVER | 9 | 54757984 | + | NM_022655    | Ireb2         | + |
| DMM133  | Cdkn2a <sup>-/-</sup> _C57 | INS.SIN.LV.SF.GFP | LIVER | 9 | 55125799 | + | NM_032002    | Nrg4          | - |
| DMM140  | Cdkn2a <sup>-/-</sup> _C57 | INS.SIN.LV.SF.GFP | LIVER | 9 | 59279964 | - | NM_019927    | Arih1         | - |
| DMM134  | Cdkn2a <sup>-/-</sup> _C57 | INS.SIN.LV.SF.GFP | LIVER | 9 | 62227408 | - | NM_009672    | Anp32a        | + |
| DMM 134 | Cdkn2a <sup>-/-</sup> _C57 | INS.SIN.LV.SF.GFP | LIVER | 9 | 63242668 | + | NM_027090    | 2300009A05Rik | - |
| DMM141  | Cdkn2a <sup>-/-</sup> _C57 | INS.SIN.LV.SF.GFP | LIVER | 9 | 65159499 | - | NM_001044389 | Clpx          | + |
| DMM 134 | Cdkn2a <sup>-/-</sup> _C57 | INS.SIN.LV.SF.GFP | LIVER | 9 | 65644768 | - | NM_172536    | Zfp609        | - |
| DMM141  | Cdkn2a <sup>-/-</sup> _C57 | INS.SIN.LV.SF.GFP | LIVER | 9 | 66268237 | + | NM_175206    | Fbx122        | - |
| DMM140  | Cdkn2a <sup>-/-</sup> _C57 | INS.SIN.LV.SF.GFP | LIVER | 9 | 66751937 | - | NM_173413    | Rab8b         | - |
| DMM128  | Cdkn2a <sup>-/-</sup> _C57 | INS.SIN.LV.SF.GFP | LIVER | 9 | 67773124 | + | NM_177184    | Vps13c        | + |
| DMM 128 | Cdkn2a <sup>-/-</sup> _C57 | INS.SIN.LV.SF.GFP | LIVER | 9 | 67793710 | + | NM_177184    | Vps13c        | + |
| DMM128  | Cdkn2a <sup>-/-</sup> _C57 | INS.SIN.LV.SF.GFP | LIVER | 9 | 70296963 | - | NM_033604    | Rnf111        | - |
| DMM141  | Cdkn2a <sup>-/-</sup> _C57 | INS.SIN.LV.SF.GFP | LIVER | 9 | 70555532 | - | NM_007399    | Adam10        | + |
| DMM146  | Cdkn2a <sup>-/-</sup> _C57 | INS.SIN.LV.SF.GFP | LIVER | 9 | 70742802 | - | NM_008280    | Lipc          | - |
| DMM141  | Cdkn2a <sup>-/-</sup> _C57 | INS.SIN.LV.SF.GFP | LIVER | 9 | 72168386 | - | NM_146224    | Suhw4         | + |
| DMM128  | Cdkn2a <sup>-/-</sup> _C57 | INS.SIN.LV.SF.GFP | LIVER | 9 | 72395851 | + | NM_001033536 | Rfx7          | + |
| DMM 134 | Cdkn2a <sup>-/-</sup> _C57 | INS.SIN.LV.SF.GFP | LIVER | 9 | 72468994 | - | NM_001033536 | Rfx7          | + |
| DMM140  | Cdkn2a <sup>-/-</sup> _C57 | INS.SIN.LV.SF.GFP | LIVER | 9 | 73323134 | + | NM_001081153 | Unc13c        | - |
| DMM 134 | Cdkn2a <sup>-/-</sup> _C57 | INS.SIN.LV.SF.GFP | LIVER | 9 | 77508293 | + | NM_172925    | Klh131        | + |

|         |                            |                   |       |   |           |   |              |               |   |
|---------|----------------------------|-------------------|-------|---|-----------|---|--------------|---------------|---|
| DMM 134 | Cdkn2a <sup>-/-</sup> _C57 | INS.SIN.LV.SF.GFP | LIVER | 9 | 78261946  | - | NM_173386    | E330016A19Rik | - |
| DMM140  | Cdkn2a <sup>-/-</sup> _C57 | INS.SIN.LV.SF.GFP | LIVER | 9 | 78447741  | + | NM_172773    | Slc17a5       | - |
| DMM128  | Cdkn2a <sup>-/-</sup> _C57 | INS.SIN.LV.SF.GFP | LIVER | 9 | 79617095  | - | NM_133718    | Tmem30a       | - |
| DMM128  | Cdkn2a <sup>-/-</sup> _C57 | INS.SIN.LV.SF.GFP | LIVER | 9 | 80108552  | - | NM_001039546 | Myo6          | + |
| DMM140  | Cdkn2a <sup>-/-</sup> _C57 | INS.SIN.LV.SF.GFP | LIVER | 9 | 81035107  | - | NM_010482    | Htr1b         | - |
| DMM 142 | Cdkn2a <sup>-/-</sup> _C57 | INS.SIN.LV.SF.GFP | LIVER | 9 | 82775914  | + | NM_001081216 | Phip          | - |
| DMM134  | Cdkn2a <sup>-/-</sup> _C57 | INS.SIN.LV.SF.GFP | LIVER | 9 | 82801220  | - | NM_001081216 | Phip          | - |
| DMM 131 | Cdkn2a <sup>-/-</sup> _C57 | INS.SIN.LV.SF.GFP | LIVER | 9 | 82822008  | - | NM_001081216 | Phip          | - |
| DMM 134 | Cdkn2a <sup>-/-</sup> _C57 | INS.SIN.LV.SF.GFP | LIVER | 9 | 82822906  | + | NM_001081216 | Phip          | - |
| DMM146  | Cdkn2a <sup>-/-</sup> _C57 | INS.SIN.LV.SF.GFP | LIVER | 9 | 82861512  | - | NM_001081216 | Phip          | - |
| DMM146  | Cdkn2a <sup>-/-</sup> _C57 | INS.SIN.LV.SF.GFP | LIVER | 9 | 83492933  | - | NM_172507    | Sh3bgrl2      | + |
| DMM141  | Cdkn2a <sup>-/-</sup> _C57 | INS.SIN.LV.SF.GFP | LIVER | 9 | 83761088  | + | NM_001110265 | Ttk           | + |
| DMM 129 | Cdkn2a <sup>-/-</sup> _C57 | INS.SIN.LV.SF.GFP | LIVER | 9 | 85585806  | - | NM_001081282 | Ibtk          | - |
| DMM128  | Cdkn2a <sup>-/-</sup> _C57 | INS.SIN.LV.SF.GFP | LIVER | 9 | 86385790  | - | NM_177208    | Dopey1        | + |
| DMM140  | Cdkn2a <sup>-/-</sup> _C57 | INS.SIN.LV.SF.GFP | LIVER | 9 | 86929507  | - | NM_024195    | Cyb5r4        | + |
| DMM130  | Cdkn2a <sup>-/-</sup> _C57 | INS.SIN.LV.SF.GFP | LIVER | 9 | 88356301  | + | NM_019666    | Syncrip       | - |
| DMM134  | Cdkn2a <sup>-/-</sup> _C57 | INS.SIN.LV.SF.GFP | LIVER | 9 | 88356604  | - | NM_019666    | Syncrip       | - |
| DMM140  | Cdkn2a <sup>-/-</sup> _C57 | INS.SIN.LV.SF.GFP | LIVER | 9 | 88359641  | - | NM_019666    | Syncrip       | - |
| DMM141  | Cdkn2a <sup>-/-</sup> _C57 | INS.SIN.LV.SF.GFP | LIVER | 9 | 88462256  | + | NM_001142943 | 4930422I07Rik | + |
| DMM146  | Cdkn2a <sup>-/-</sup> _C57 | INS.SIN.LV.SF.GFP | LIVER | 9 | 89155866  | + | NM_026829    | Mthfs         | + |
| DMM128  | Cdkn2a <sup>-/-</sup> _C57 | INS.SIN.LV.SF.GFP | LIVER | 9 | 89993292  | + | NM_001039147 | Morf411       | - |
| DMM 128 | Cdkn2a <sup>-/-</sup> _C57 | INS.SIN.LV.SF.GFP | LIVER | 9 | 92128327  | + | NM_011636    | Plscr1        | + |
| DMM140  | Cdkn2a <sup>-/-</sup> _C57 | INS.SIN.LV.SF.GFP | LIVER | 9 | 94548109  | - | NM_177909    | Slc9a9        | + |
| DMM128  | Cdkn2a <sup>-/-</sup> _C57 | INS.SIN.LV.SF.GFP | LIVER | 9 | 94641762  | + | NM_177909    | Slc9a9        | + |
| DMM141  | Cdkn2a <sup>-/-</sup> _C57 | INS.SIN.LV.SF.GFP | LIVER | 9 | 95405446  | - | NM_001114977 | 2610101N10Rik | - |
| DMM140  | Cdkn2a <sup>-/-</sup> _C57 | INS.SIN.LV.SF.GFP | LIVER | 9 | 95480429  | - | NM_198414    | Paqr9         | + |
| DMM146  | Cdkn2a <sup>-/-</sup> _C57 | INS.SIN.LV.SF.GFP | LIVER | 9 | 95545055  | + | NM_029620    | Pcolce2       | + |
| DMM134  | Cdkn2a <sup>-/-</sup> _C57 | INS.SIN.LV.SF.GFP | LIVER | 9 | 95832008  | - | NM_019864    | Atr           | + |
| DMM 134 | Cdkn2a <sup>-/-</sup> _C57 | INS.SIN.LV.SF.GFP | LIVER | 9 | 95852642  | - | NM_019864    | Atr           | + |
| DMM140  | Cdkn2a <sup>-/-</sup> _C57 | INS.SIN.LV.SF.GFP | LIVER | 9 | 95912238  | + | NM_011916    | Xrn1          | + |
| DMM128  | Cdkn2a <sup>-/-</sup> _C57 | INS.SIN.LV.SF.GFP | LIVER | 9 | 96462622  | + | NM_053268    | Rasa2         | - |
| DMM146  | Cdkn2a <sup>-/-</sup> _C57 | INS.SIN.LV.SF.GFP | LIVER | 9 | 99004128  | + | NM_029094    | Pik3cb        | - |
| DMM140  | Cdkn2a <sup>-/-</sup> _C57 | INS.SIN.LV.SF.GFP | LIVER | 9 | 100640138 | - | NM_009282    | Stag1         | + |
| DMM139  | Cdkn2a <sup>-/-</sup> _C57 | INS.SIN.LV.SF.GFP | LIVER | 9 | 100669122 | + | NM_009282    | Stag1         | + |
| DMM140  | Cdkn2a <sup>-/-</sup> _C57 | INS.SIN.LV.SF.GFP | LIVER | 9 | 100699648 | + | NM_009282    | Stag1         | + |

|         |                            |                   |       |    |           |   |              |               |   |
|---------|----------------------------|-------------------|-------|----|-----------|---|--------------|---------------|---|
| DMM141  | Cdkn2a <sup>-/-</sup> _C57 | INS.SIN.LV.SF.GFP | LIVER | 9  | 100849277 | + | NM_009282    | Stag1         | + |
| DMM141  | Cdkn2a <sup>-/-</sup> _C57 | INS.SIN.LV.SF.GFP | LIVER | 9  | 101106372 | - | NM_001161362 | 3222402P14Rik | - |
| DMM 128 | Cdkn2a <sup>-/-</sup> _C57 | INS.SIN.LV.SF.GFP | LIVER | 9  | 102533854 | + | NM_181394    | Anapc13       | + |
| DMM146  | Cdkn2a <sup>-/-</sup> _C57 | INS.SIN.LV.SF.GFP | LIVER | 9  | 104159149 | - | NM_207668    | Acpp          | - |
| DMM140  | Cdkn2a <sup>-/-</sup> _C57 | INS.SIN.LV.SF.GFP | LIVER | 9  | 105314997 | - | NM_175025    | Atp2c1        | - |
| DMM 142 | Cdkn2a <sup>-/-</sup> _C57 | INS.SIN.LV.SF.GFP | LIVER | 9  | 105586300 | + | NM_001081309 | Pik3r4        | + |
| DMM141  | Cdkn2a <sup>-/-</sup> _C57 | INS.SIN.LV.SF.GFP | LIVER | 9  | 106079954 | - | NM_029896    | Wdr82         | + |
| DMM141  | Cdkn2a <sup>-/-</sup> _C57 | INS.SIN.LV.SF.GFP | LIVER | 9  | 106080899 | + | NM_029896    | Wdr82         | + |
| DMM140  | Cdkn2a <sup>-/-</sup> _C57 | INS.SIN.LV.SF.GFP | LIVER | 9  | 106684399 | + | NM_030730    | Rad54l2       | - |
| DMM140  | Cdkn2a <sup>-/-</sup> _C57 | INS.SIN.LV.SF.GFP | LIVER | 9  | 110448546 | - | NM_001081340 | Setd2         | + |
| DMM139  | Cdkn2a <sup>-/-</sup> _C57 | INS.SIN.LV.SF.GFP | LIVER | 9  | 111167178 | + | NM_026810    | Mlh1          | - |
| DMM140  | Cdkn2a <sup>-/-</sup> _C57 | INS.SIN.LV.SF.GFP | LIVER | 9  | 113661296 | + | NM_001114347 | Clasp2        | + |
| DMM141  | Cdkn2a <sup>-/-</sup> _C57 | INS.SIN.LV.SF.GFP | LIVER | 9  | 113719545 | + | NM_001114347 | Clasp2        | + |
| DMM 128 | Cdkn2a <sup>-/-</sup> _C57 | INS.SIN.LV.SF.GFP | LIVER | 9  | 113818401 | - | NM_001081960 | Clasp2        | + |
| DMM134  | Cdkn2a <sup>-/-</sup> _C57 | INS.SIN.LV.SF.GFP | LIVER | 9  | 116030738 | + | NM_029575    | Tgfbr2        | - |
| DMM146  | Cdkn2a <sup>-/-</sup> _C57 | INS.SIN.LV.SF.GFP | LIVER | 9  | 116261591 | + | NM_009371    | Tgfbr2        | - |
| DMM128  | Cdkn2a <sup>-/-</sup> _C57 | INS.SIN.LV.SF.GFP | LIVER | 9  | 123450878 | - | NM_030692    | Sacm11        | + |
| DMM128  | Cdkn2a <sup>-/-</sup> _C57 | INS.SIN.LV.SF.GFP | LIVER | 10 | 3629695   | + | NM_001039652 | Oprm1         | - |
| DMM140  | Cdkn2a <sup>-/-</sup> _C57 | INS.SIN.LV.SF.GFP | LIVER | 10 | 5091444   | - | NM_001079686 | Syne1         | + |
| DMM140  | Cdkn2a <sup>-/-</sup> _C57 | INS.SIN.LV.SF.GFP | LIVER | 10 | 5980032   | + | NM_001033466 | Zbtb2         | + |
| DMM130  | Cdkn2a <sup>-/-</sup> _C57 | INS.SIN.LV.SF.GFP | LIVER | 10 | 7408855   | - | NM_010690    | Lats1         | + |
| DMM134  | Cdkn2a <sup>-/-</sup> _C57 | INS.SIN.LV.SF.GFP | LIVER | 10 | 7543680   | + | NM_026141    | Ppil4         | + |
| DMM134  | Cdkn2a <sup>-/-</sup> _C57 | INS.SIN.LV.SF.GFP | LIVER | 10 | 7553153   | + | NM_172785    | Zc3h12d       | + |
| DMM134  | Cdkn2a <sup>-/-</sup> _C57 | INS.SIN.LV.SF.GFP | LIVER | 10 | 8566531   | + | NM_175155    | Sash1         | - |
| DMM140  | Cdkn2a <sup>-/-</sup> _C57 | INS.SIN.LV.SF.GFP | LIVER | 10 | 11003665  | - | NM_027968    | Fbxo30        | + |
| DMM141  | Cdkn2a <sup>-/-</sup> _C57 | INS.SIN.LV.SF.GFP | LIVER | 10 | 12219933  | - | NM_011682    | Utrn          | - |
| DMM128  | Cdkn2a <sup>-/-</sup> _C57 | INS.SIN.LV.SF.GFP | LIVER | 10 | 12672970  | + | NM_175102    | Sf3b5         | + |
| DMM146  | Cdkn2a <sup>-/-</sup> _C57 | INS.SIN.LV.SF.GFP | LIVER | 10 | 12981935  | - | NM_001033257 | Phactr2       | - |
| DMM 149 | Cdkn2a <sup>-/-</sup> _C57 | INS.SIN.LV.SF.GFP | LIVER | 10 | 12995311  | - | NM_001033257 | Phactr2       | - |
| DMM128  | Cdkn2a <sup>-/-</sup> _C57 | INS.SIN.LV.SF.GFP | LIVER | 10 | 15109766  | - | NM_008703    | Nmbr          | + |
| DMM 128 | Cdkn2a <sup>-/-</sup> _C57 | INS.SIN.LV.SF.GFP | LIVER | 10 | 16134959  | - | NM_010828    | Cited2        | + |
| DMM134  | Cdkn2a <sup>-/-</sup> _C57 | INS.SIN.LV.SF.GFP | LIVER | 10 | 16597216  | - | NM_010828    | Cited2        | + |
| DMM140  | Cdkn2a <sup>-/-</sup> _C57 | INS.SIN.LV.SF.GFP | LIVER | 10 | 16699454  | - | NM_010828    | Cited2        | + |
| DMM134  | Cdkn2a <sup>-/-</sup> _C57 | INS.SIN.LV.SF.GFP | LIVER | 10 | 20060523  | - | NM_001025392 | Bclaf1        | + |
| DMM140  | Cdkn2a <sup>-/-</sup> _C57 | INS.SIN.LV.SF.GFP | LIVER | 10 | 20437697  | + | NM_013875    | Pde7b         | - |

|         |                            |                   |       |    |          |   |              |          |   |
|---------|----------------------------|-------------------|-------|----|----------|---|--------------|----------|---|
| DMM 130 | Cdkn2a <sup>-/-</sup> _C57 | INS.SIN.LV.SF.GFP | LIVER | 10 | 21862573 | - | NM_009016    | Raet1a   | + |
| DMM140  | Cdkn2a <sup>-/-</sup> _C57 | INS.SIN.LV.SF.GFP | LIVER | 10 | 21982425 | - | NM_009018    | Raet1c   | + |
| DMM128  | Cdkn2a <sup>-/-</sup> _C57 | INS.SIN.LV.SF.GFP | LIVER | 10 | 22892007 | + | NM_010167    | Eya4     | - |
| DMM134  | Cdkn2a <sup>-/-</sup> _C57 | INS.SIN.LV.SF.GFP | LIVER | 10 | 23835650 | + | NM_001010831 | Taar9    | - |
| DMM141  | Cdkn2a <sup>-/-</sup> _C57 | INS.SIN.LV.SF.GFP | LIVER | 10 | 25093042 | + | NM_013511    | Epb4.112 | + |
| DMM146  | Cdkn2a <sup>-/-</sup> _C57 | INS.SIN.LV.SF.GFP | LIVER | 10 | 28041923 | - | NM_008983    | Ptprk    | + |
| DMM146  | Cdkn2a <sup>-/-</sup> _C57 | INS.SIN.LV.SF.GFP | LIVER | 10 | 28047693 | + | NM_008983    | Ptprk    | + |
| DMM146  | Cdkn2a <sup>-/-</sup> _C57 | INS.SIN.LV.SF.GFP | LIVER | 10 | 30313401 | - | NM_028604    | Trmt11   | - |
| DMM 149 | Cdkn2a <sup>-/-</sup> _C57 | INS.SIN.LV.SF.GFP | LIVER | 10 | 30332791 | + | NM_025798    | Hint3    | - |
| DMM128  | Cdkn2a <sup>-/-</sup> _C57 | INS.SIN.LV.SF.GFP | LIVER | 10 | 30366275 | - | NM_001111267 | Ncoa7    | - |
| DMM140  | Cdkn2a <sup>-/-</sup> _C57 | INS.SIN.LV.SF.GFP | LIVER | 10 | 30414962 | + | NM_172495    | Ncoa7    | - |
| DMM140  | Cdkn2a <sup>-/-</sup> _C57 | INS.SIN.LV.SF.GFP | LIVER | 10 | 32341901 | + | NM_001013411 | Nkain2   | - |
| DMM140  | Cdkn2a <sup>-/-</sup> _C57 | INS.SIN.LV.SF.GFP | LIVER | 10 | 33723196 | - | NM_025614    | Rwdd1    | - |
| DMM140  | Cdkn2a <sup>-/-</sup> _C57 | INS.SIN.LV.SF.GFP | LIVER | 10 | 35066082 | - | NM_001159544 | Frk      | + |
| DMM141  | Cdkn2a <sup>-/-</sup> _C57 | INS.SIN.LV.SF.GFP | LIVER | 10 | 35385673 | + | NM_001081208 | Hs3st5   | + |
| DMM 134 | Cdkn2a <sup>-/-</sup> _C57 | INS.SIN.LV.SF.GFP | LIVER | 10 | 36717452 | + | NM_008229    | Hdac2    | + |
| DMM140  | Cdkn2a <sup>-/-</sup> _C57 | INS.SIN.LV.SF.GFP | LIVER | 10 | 37132114 | - | NM_008538    | Marcks   | - |
| DMM140  | Cdkn2a <sup>-/-</sup> _C57 | INS.SIN.LV.SF.GFP | LIVER | 10 | 37193000 | - | NM_008538    | Marcks   | - |
| DMM140  | Cdkn2a <sup>-/-</sup> _C57 | INS.SIN.LV.SF.GFP | LIVER | 10 | 37663043 | - | NM_008538    | Marcks   | - |
| DMM140  | Cdkn2a <sup>-/-</sup> _C57 | INS.SIN.LV.SF.GFP | LIVER | 10 | 38871363 | - | NM_001127376 | Wisp3    | - |
| DMM 142 | Cdkn2a <sup>-/-</sup> _C57 | INS.SIN.LV.SF.GFP | LIVER | 10 | 39157008 | - | NM_001122892 | Fyn      | + |
| DMM 142 | Cdkn2a <sup>-/-</sup> _C57 | INS.SIN.LV.SF.GFP | LIVER | 10 | 39479186 | - | NM_011264    | Rev31    | + |
| DMM141  | Cdkn2a <sup>-/-</sup> _C57 | INS.SIN.LV.SF.GFP | LIVER | 10 | 41300922 | + | NM_016898    | Cd164    | + |
| DMM 134 | Cdkn2a <sup>-/-</sup> _C57 | INS.SIN.LV.SF.GFP | LIVER | 10 | 42485604 | - | NM_153055    | Sec63    | + |
| DMM146  | Cdkn2a <sup>-/-</sup> _C57 | INS.SIN.LV.SF.GFP | LIVER | 10 | 45134968 | + | NM_001031772 | Lin28b   | - |
| DMM134  | Cdkn2a <sup>-/-</sup> _C57 | INS.SIN.LV.SF.GFP | LIVER | 10 | 45177854 | + | NM_001031772 | Lin28b   | - |
| DMM 142 | Cdkn2a <sup>-/-</sup> _C57 | INS.SIN.LV.SF.GFP | LIVER | 10 | 45323651 | - | NM_172473    | Hace1    | + |
| DMM 142 | Cdkn2a <sup>-/-</sup> _C57 | INS.SIN.LV.SF.GFP | LIVER | 10 | 45681482 | + | NM_172473    | Hace1    | + |
| DMM 139 | Cdkn2a <sup>-/-</sup> _C57 | INS.SIN.LV.SF.GFP | LIVER | 10 | 50368159 | - | NM_001146089 | Ascc3    | + |
| DMM140  | Cdkn2a <sup>-/-</sup> _C57 | INS.SIN.LV.SF.GFP | LIVER | 10 | 50411827 | + | NM_001146089 | Ascc3    | + |
| DMM139  | Cdkn2a <sup>-/-</sup> _C57 | INS.SIN.LV.SF.GFP | LIVER | 10 | 51238004 | + | NM_013532    | Lilrb4   | + |
| DMM133  | Cdkn2a <sup>-/-</sup> _C57 | INS.SIN.LV.SF.GFP | LIVER | 10 | 52069191 | + | NM_053187    | Gopc     | - |
| DMM133  | Cdkn2a <sup>-/-</sup> _C57 | INS.SIN.LV.SF.GFP | LIVER | 10 | 52069533 | - | NM_053187    | Gopc     | - |
| DMM133  | Cdkn2a <sup>-/-</sup> _C57 | INS.SIN.LV.SF.GFP | LIVER | 10 | 52069587 | - | NM_053187    | Gopc     | - |
| DMM140  | Cdkn2a <sup>-/-</sup> _C57 | INS.SIN.LV.SF.GFP | LIVER | 10 | 52079548 | - | NM_053187    | Gopc     | - |

|         |                            |                   |       |    |          |   |              |               |   |
|---------|----------------------------|-------------------|-------|----|----------|---|--------------|---------------|---|
| DMM 134 | Cdkn2a <sup>-/-</sup> _C57 | INS.SIN.LV.SF.GFP | LIVER | 10 | 52999020 | - | NM_001141927 | Pln           | + |
| DMM 145 | Cdkn2a <sup>-/-</sup> _C57 | INS.SIN.LV.SF.GFP | LIVER | 10 | 53024390 | + | NM_001141927 | Pln           | + |
| DMM 134 | Cdkn2a <sup>-/-</sup> _C57 | INS.SIN.LV.SF.GFP | LIVER | 10 | 53086286 | - | NM_001141927 | Pln           | + |
| DMM141  | Cdkn2a <sup>-/-</sup> _C57 | INS.SIN.LV.SF.GFP | LIVER | 10 | 53331835 | + | NM_027830    | Mcm9          | - |
| DMM140  | Cdkn2a <sup>-/-</sup> _C57 | INS.SIN.LV.SF.GFP | LIVER | 10 | 53719561 | - | NM_008548    | Man1a         | - |
| DMM134  | Cdkn2a <sup>-/-</sup> _C57 | INS.SIN.LV.SF.GFP | LIVER | 10 | 53784117 | + | NM_008548    | Man1a         | - |
| DMM134  | Cdkn2a <sup>-/-</sup> _C57 | INS.SIN.LV.SF.GFP | LIVER | 10 | 53784737 | + | NM_008548    | Man1a         | - |
| DMM141  | Cdkn2a <sup>-/-</sup> _C57 | INS.SIN.LV.SF.GFP | LIVER | 10 | 53868716 | + | NM_008548    | Man1a         | - |
| DMM 128 | Cdkn2a <sup>-/-</sup> _C57 | INS.SIN.LV.SF.GFP | LIVER | 10 | 55234695 | - | NM_001033385 | D630037F22Rik | - |
| DMM 142 | Cdkn2a <sup>-/-</sup> _C57 | INS.SIN.LV.SF.GFP | LIVER | 10 | 56418745 | - | NM_010288    | Gja1          | + |
| DMM 141 | Cdkn2a <sup>-/-</sup> _C57 | INS.SIN.LV.SF.GFP | LIVER | 10 | 56526973 | + | NM_010288    | Gja1          | + |
| DMM133  | Cdkn2a <sup>-/-</sup> _C57 | INS.SIN.LV.SF.GFP | LIVER | 10 | 56535920 | - | NM_010288    | Gja1          | + |
| DMM128  | Cdkn2a <sup>-/-</sup> _C57 | INS.SIN.LV.SF.GFP | LIVER | 10 | 56555043 | - | NM_010288    | Gja1          | + |
| DMM 134 | Cdkn2a <sup>-/-</sup> _C57 | INS.SIN.LV.SF.GFP | LIVER | 10 | 57919000 | - | NM_011240    | Ranbp2        | + |
| DMM141  | Cdkn2a <sup>-/-</sup> _C57 | INS.SIN.LV.SF.GFP | LIVER | 10 | 57941914 | + | NM_011240    | Ranbp2        | + |
| DMM134  | Cdkn2a <sup>-/-</sup> _C57 | INS.SIN.LV.SF.GFP | LIVER | 10 | 62107482 | - | NM_053183    | Ddx50         | - |
| DMM128  | Cdkn2a <sup>-/-</sup> _C57 | INS.SIN.LV.SF.GFP | LIVER | 10 | 62724722 | - | NM_026101    | Herc4         | + |
| DMM146  | Cdkn2a <sup>-/-</sup> _C57 | INS.SIN.LV.SF.GFP | LIVER | 10 | 66732149 | + | NM_001036293 | Nrbf2         | - |
| DMM 128 | Cdkn2a <sup>-/-</sup> _C57 | INS.SIN.LV.SF.GFP | LIVER | 10 | 66743352 | - | NM_001036293 | Nrbf2         | - |
| DMM140  | Cdkn2a <sup>-/-</sup> _C57 | INS.SIN.LV.SF.GFP | LIVER | 10 | 67554788 | - | NM_023598    | Arid5b        | - |
| DMM 141 | Cdkn2a <sup>-/-</sup> _C57 | INS.SIN.LV.SF.GFP | LIVER | 10 | 67752829 | + | NM_023598    | Arid5b        | - |
| DMM133  | Cdkn2a <sup>-/-</sup> _C57 | INS.SIN.LV.SF.GFP | LIVER | 10 | 67888935 | + | NM_028491    | 1700040L02Rik | - |
| DMM140  | Cdkn2a <sup>-/-</sup> _C57 | INS.SIN.LV.SF.GFP | LIVER | 10 | 71808841 | + | NM_025635    | Zwint         | + |
| DMM140  | Cdkn2a <sup>-/-</sup> _C57 | INS.SIN.LV.SF.GFP | LIVER | 10 | 72134575 | - | NM_025635    | Zwint         | + |
| DMM128  | Cdkn2a <sup>-/-</sup> _C57 | INS.SIN.LV.SF.GFP | LIVER | 10 | 74717524 | + | NM_001145826 | Cytsa         | + |
| DMM146  | Cdkn2a <sup>-/-</sup> _C57 | INS.SIN.LV.SF.GFP | LIVER | 10 | 84415406 | - | NM_001013441 | Ric8b         | + |
| DMM 128 | Cdkn2a <sup>-/-</sup> _C57 | INS.SIN.LV.SF.GFP | LIVER | 10 | 87298368 | + | NM_001111275 | Igf1          | + |
| DMM 128 | Cdkn2a <sup>-/-</sup> _C57 | INS.SIN.LV.SF.GFP | LIVER | 10 | 87425436 | + | NR_000040    | Tyms-ps       | + |
| DMM141  | Cdkn2a <sup>-/-</sup> _C57 | INS.SIN.LV.SF.GFP | LIVER | 10 | 87554917 | + | NM_029971    | Pmch          | + |
| DMM146  | Cdkn2a <sup>-/-</sup> _C57 | INS.SIN.LV.SF.GFP | LIVER | 10 | 87634556 | + | NM_027191    | Nup37         | + |
| DMM 140 | Cdkn2a <sup>-/-</sup> _C57 | INS.SIN.LV.SF.GFP | LIVER | 10 | 87932457 | - | NM_011517    | Sycp3         | + |
| DMM140  | Cdkn2a <sup>-/-</sup> _C57 | INS.SIN.LV.SF.GFP | LIVER | 10 | 88280966 | + | NM_175158    | Utp20         | - |
| DMM134  | Cdkn2a <sup>-/-</sup> _C57 | INS.SIN.LV.SF.GFP | LIVER | 10 | 90452735 | + | NM_001042558 | Apaf1         | - |
| DMM140  | Cdkn2a <sup>-/-</sup> _C57 | INS.SIN.LV.SF.GFP | LIVER | 10 | 90531721 | + | NM_001042558 | Apaf1         | - |
| DMM140  | Cdkn2a <sup>-/-</sup> _C57 | INS.SIN.LV.SF.GFP | LIVER | 10 | 90560557 | - | NM_026166    | 1200009F10Rik | + |



|         |                            |                   |       |    |           |   |              |               |   |
|---------|----------------------------|-------------------|-------|----|-----------|---|--------------|---------------|---|
| DMM140  | Cdkn2a <sup>-/-</sup> _C57 | INS.SIN.LV.SF.GFP | LIVER | 10 | 90606643  | - | NM_001080129 | Tmpo          | - |
| DMM141  | Cdkn2a <sup>-/-</sup> _C57 | INS.SIN.LV.SF.GFP | LIVER | 10 | 90625665  | - | NM_011605    | Tmpo          | - |
| DMM146  | Cdkn2a <sup>-/-</sup> _C57 | INS.SIN.LV.SF.GFP | LIVER | 10 | 90628085  | - | NM_011605    | Tmpo          | - |
| DMM139  | Cdkn2a <sup>-/-</sup> _C57 | INS.SIN.LV.SF.GFP | LIVER | 10 | 92665959  | - | NM_146239    | Pctk2         | + |
| DMM128  | Cdkn2a <sup>-/-</sup> _C57 | INS.SIN.LV.SF.GFP | LIVER | 10 | 92693334  | + | NM_146239    | Pctk2         | + |
| DMM139  | Cdkn2a <sup>-/-</sup> _C57 | INS.SIN.LV.SF.GFP | LIVER | 10 | 95466050  | - | NM_001001932 | Eea1          | + |
| DMM 139 | Cdkn2a <sup>-/-</sup> _C57 | INS.SIN.LV.SF.GFP | LIVER | 10 | 96302736  | + | NM_007569    | Btg1          | + |
| DMM128  | Cdkn2a <sup>-/-</sup> _C57 | INS.SIN.LV.SF.GFP | LIVER | 10 | 98120715  | - | NM_026482    | Atp2b1        | + |
| DMM140  | Cdkn2a <sup>-/-</sup> _C57 | INS.SIN.LV.SF.GFP | LIVER | 10 | 98144290  | - | NM_026482    | Atp2b1        | + |
| DMM139  | Cdkn2a <sup>-/-</sup> _C57 | INS.SIN.LV.SF.GFP | LIVER | 10 | 98246964  | - | NM_026482    | Atp2b1        | + |
| DMM 134 | Cdkn2a <sup>-/-</sup> _C57 | INS.SIN.LV.SF.GFP | LIVER | 10 | 98478427  | + | NM_026482    | Atp2b1        | + |
| DMM141  | Cdkn2a <sup>-/-</sup> _C57 | INS.SIN.LV.SF.GFP | LIVER | 10 | 99533848  | - | NM_013598    | Kitl          | + |
| DMM140  | Cdkn2a <sup>-/-</sup> _C57 | INS.SIN.LV.SF.GFP | LIVER | 10 | 99933095  | + | NM_001033332 | Tmtc3         | - |
| DMM146  | Cdkn2a <sup>-/-</sup> _C57 | INS.SIN.LV.SF.GFP | LIVER | 10 | 100234240 | + | NM_001081246 | 1700017N19Rik | + |
| DMM140  | Cdkn2a <sup>-/-</sup> _C57 | INS.SIN.LV.SF.GFP | LIVER | 10 | 100258258 | + | NM_001081246 | 1700017N19Rik | + |
| DMM146  | Cdkn2a <sup>-/-</sup> _C57 | INS.SIN.LV.SF.GFP | LIVER | 10 | 100281770 | - | NM_001081246 | 1700017N19Rik | + |
| DMM128  | Cdkn2a <sup>-/-</sup> _C57 | INS.SIN.LV.SF.GFP | LIVER | 10 | 100301944 | + | NM_001081246 | 1700017N19Rik | + |
| DMM134  | Cdkn2a <sup>-/-</sup> _C57 | INS.SIN.LV.SF.GFP | LIVER | 10 | 105233510 | - | NM_207522    | BC067068      | - |
| DMM128  | Cdkn2a <sup>-/-</sup> _C57 | INS.SIN.LV.SF.GFP | LIVER | 10 | 105282297 | - | NM_025602    | Ccdc59        | + |
| DMM 133 | Cdkn2a <sup>-/-</sup> _C57 | INS.SIN.LV.SF.GFP | LIVER | 10 | 108728814 | + | NM_009306    | Syt1          | - |
| DMM130  | Cdkn2a <sup>-/-</sup> _C57 | INS.SIN.LV.SF.GFP | LIVER | 10 | 110198801 | - | NM_178609    | E2f7          | + |
| DMM141  | Cdkn2a <sup>-/-</sup> _C57 | INS.SIN.LV.SF.GFP | LIVER | 10 | 110386650 | + | NM_172554    | Zdhhc17       | - |
| DMM 140 | Cdkn2a <sup>-/-</sup> _C57 | INS.SIN.LV.SF.GFP | LIVER | 10 | 111115050 | - | NM_009344    | Phlda1        | + |
| DMM140  | Cdkn2a <sup>-/-</sup> _C57 | INS.SIN.LV.SF.GFP | LIVER | 10 | 114648009 | - | NM_025706    | Tbc1d15       | - |
| DMM140  | Cdkn2a <sup>-/-</sup> _C57 | INS.SIN.LV.SF.GFP | LIVER | 10 | 114843370 | - | NM_001033261 | Zfc3h1        | + |
| DMM 141 | Cdkn2a <sup>-/-</sup> _C57 | INS.SIN.LV.SF.GFP | LIVER | 10 | 115146948 | - | NM_146010    | Tspan8        | + |
| DMM128  | Cdkn2a <sup>-/-</sup> _C57 | INS.SIN.LV.SF.GFP | LIVER | 10 | 115970448 | - | NM_001037848 | Cnot2         | - |
| DMM 134 | Cdkn2a <sup>-/-</sup> _C57 | INS.SIN.LV.SF.GFP | LIVER | 10 | 115990610 | - | NM_001037846 | Cnot2         | - |
| DMM139  | Cdkn2a <sup>-/-</sup> _C57 | INS.SIN.LV.SF.GFP | LIVER | 10 | 116171344 | - | NM_001033333 | Gm239         | - |
| DMM146  | Cdkn2a <sup>-/-</sup> _C57 | INS.SIN.LV.SF.GFP | LIVER | 10 | 118083628 | - | NM_008337    | Ifng          | + |
| DMM 141 | Cdkn2a <sup>-/-</sup> _C57 | INS.SIN.LV.SF.GFP | LIVER | 10 | 118168829 | - | NM_001014390 | Dyrk2         | - |
| DMM134  | Cdkn2a <sup>-/-</sup> _C57 | INS.SIN.LV.SF.GFP | LIVER | 10 | 118262742 | - | NM_001014390 | Dyrk2         | - |
| DMM128  | Cdkn2a <sup>-/-</sup> _C57 | INS.SIN.LV.SF.GFP | LIVER | 10 | 118334284 | - | NM_001014390 | Dyrk2         | - |
| DMM 149 | Cdkn2a <sup>-/-</sup> _C57 | INS.SIN.LV.SF.GFP | LIVER | 10 | 119896202 | - | NM_010441    | Hmga2         | - |
| DMM140  | Cdkn2a <sup>-/-</sup> _C57 | INS.SIN.LV.SF.GFP | LIVER | 10 | 120828422 | - | NM_029364    | Gns           | + |

|         |                            |                   |       |    |           |   |              |               |   |
|---------|----------------------------|-------------------|-------|----|-----------|---|--------------|---------------|---|
| DMM141  | Cdkn2a <sup>-/-</sup> _C57 | INS.SIN.LV.SF.GFP | LIVER | 10 | 124773141 | - | NM_011391    | Slc16a7       | - |
| DMM 140 | Cdkn2a <sup>-/-</sup> _C57 | INS.SIN.LV.SF.GFP | LIVER | 10 | 125168377 | - | NM_177152    | Lrig3         | + |
| DMM139  | Cdkn2a <sup>-/-</sup> _C57 | INS.SIN.LV.SF.GFP | LIVER | 10 | 128316612 | - | NM_025364    | Sarnp         | + |
| DMM 131 | Cdkn2a <sup>-/-</sup> _C57 | INS.SIN.LV.SF.GFP | LIVER | 11 | 3002120   | + | NR_003517    | Pisd-ps1      | + |
| DMM141  | Cdkn2a <sup>-/-</sup> _C57 | INS.SIN.LV.SF.GFP | LIVER | 11 | 3061491   | - | NM_030207    | Sfi1          | - |
| DMM141  | Cdkn2a <sup>-/-</sup> _C57 | INS.SIN.LV.SF.GFP | LIVER | 11 | 3075783   | + | NM_030207    | Sfi1          | - |
| DMM140  | Cdkn2a <sup>-/-</sup> _C57 | INS.SIN.LV.SF.GFP | LIVER | 11 | 3076697   | - | NM_030207    | Sfi1          | - |
| DMM 134 | Cdkn2a <sup>-/-</sup> _C57 | INS.SIN.LV.SF.GFP | LIVER | 11 | 3079046   | - | NM_030207    | Sfi1          | - |
| DMM 139 | Cdkn2a <sup>-/-</sup> _C57 | INS.SIN.LV.SF.GFP | LIVER | 11 | 3079573   | + | NM_030207    | Sfi1          | - |
| DMM 134 | Cdkn2a <sup>-/-</sup> _C57 | INS.SIN.LV.SF.GFP | LIVER | 11 | 3337038   | - | NM_145355    | Rnf185        | - |
| DMM140  | Cdkn2a <sup>-/-</sup> _C57 | INS.SIN.LV.SF.GFP | LIVER | 11 | 8582145   | + | NM_001083587 | Tns3          | - |
| DMM140  | Cdkn2a <sup>-/-</sup> _C57 | INS.SIN.LV.SF.GFP | LIVER | 11 | 11606570  | - | NM_001025597 | Ikzf1         | + |
| DMM141  | Cdkn2a <sup>-/-</sup> _C57 | INS.SIN.LV.SF.GFP | LIVER | 11 | 16533104  | - | NM_007912    | Egfr          | + |
| DMM128  | Cdkn2a <sup>-/-</sup> _C57 | INS.SIN.LV.SF.GFP | LIVER | 11 | 16546367  | + | NM_007912    | Egfr          | + |
| DMM140  | Cdkn2a <sup>-/-</sup> _C57 | INS.SIN.LV.SF.GFP | LIVER | 11 | 16858604  | + | NM_176982    | Fbxo48        | + |
| DMM 130 | Cdkn2a <sup>-/-</sup> _C57 | INS.SIN.LV.SF.GFP | LIVER | 11 | 17079872  | + | NM_024459    | Ppp3r1        | + |
| DMM 142 | Cdkn2a <sup>-/-</sup> _C57 | INS.SIN.LV.SF.GFP | LIVER | 11 | 17841274  | - | NM_026576    | Etaa1         | - |
| DMM128  | Cdkn2a <sup>-/-</sup> _C57 | INS.SIN.LV.SF.GFP | LIVER | 11 | 17849623  | - | NM_026576    | Etaa1         | - |
| DMM 134 | Cdkn2a <sup>-/-</sup> _C57 | INS.SIN.LV.SF.GFP | LIVER | 11 | 18902927  | + | NM_010789    | Meis1         | - |
| DMM140  | Cdkn2a <sup>-/-</sup> _C57 | INS.SIN.LV.SF.GFP | LIVER | 11 | 20106281  | - | NM_008996    | Rab1          | + |
| DMM 142 | Cdkn2a <sup>-/-</sup> _C57 | INS.SIN.LV.SF.GFP | LIVER | 11 | 22922442  | + | NM_009837    | Cct4          | + |
| DMM141  | Cdkn2a <sup>-/-</sup> _C57 | INS.SIN.LV.SF.GFP | LIVER | 11 | 23588182  | - | NM_028304    | Pus10         | + |
| DMM 141 | Cdkn2a <sup>-/-</sup> _C57 | INS.SIN.LV.SF.GFP | LIVER | 11 | 26335599  | - | NM_025923    | Fanc1         | + |
| DMM 134 | Cdkn2a <sup>-/-</sup> _C57 | INS.SIN.LV.SF.GFP | LIVER | 11 | 26450292  | + | NM_027260    | Vrk2          | - |
| DMM 128 | Cdkn2a <sup>-/-</sup> _C57 | INS.SIN.LV.SF.GFP | LIVER | 11 | 26477251  | + | NM_027260    | Vrk2          | - |
| DMM133  | Cdkn2a <sup>-/-</sup> _C57 | INS.SIN.LV.SF.GFP | LIVER | 11 | 28100153  | + | NM_181577    | Ccdc85a       | - |
| DMM140  | Cdkn2a <sup>-/-</sup> _C57 | INS.SIN.LV.SF.GFP | LIVER | 11 | 29102722  | + | NM_134034    | Smek2         | + |
| DMM 149 | Cdkn2a <sup>-/-</sup> _C57 | INS.SIN.LV.SF.GFP | LIVER | 11 | 29287846  | - | NM_176841    | Ccdc88a       | + |
| DMM140  | Cdkn2a <sup>-/-</sup> _C57 | INS.SIN.LV.SF.GFP | LIVER | 11 | 29300093  | + | NM_176841    | Ccdc88a       | + |
| DMM140  | Cdkn2a <sup>-/-</sup> _C57 | INS.SIN.LV.SF.GFP | LIVER | 11 | 29330074  | - | NM_176841    | Ccdc88a       | + |
| DMM128  | Cdkn2a <sup>-/-</sup> _C57 | INS.SIN.LV.SF.GFP | LIVER | 11 | 29364236  | + | NM_176841    | Ccdc88a       | + |
| DMM139  | Cdkn2a <sup>-/-</sup> _C57 | INS.SIN.LV.SF.GFP | LIVER | 11 | 29714089  | + | NM_146016    | C230094A16Rik | - |
| DMM146  | Cdkn2a <sup>-/-</sup> _C57 | INS.SIN.LV.SF.GFP | LIVER | 11 | 30689404  | + | NM_134013    | Psme4         | + |
| DMM134  | Cdkn2a <sup>-/-</sup> _C57 | INS.SIN.LV.SF.GFP | LIVER | 11 | 31806844  | + | NM_026252    | Cpeb4         | + |
| DMM141  | Cdkn2a <sup>-/-</sup> _C57 | INS.SIN.LV.SF.GFP | LIVER | 11 | 36760226  | + | NM_011856    | Odz2          | - |

|         |                            |                   |       |    |           |   |              |               |   |
|---------|----------------------------|-------------------|-------|----|-----------|---|--------------|---------------|---|
| DMM 128 | Cdkn2a <sup>-/-</sup> _C57 | INS.SIN.LV.SF.GFP | LIVER | 11 | 36762102  | + | NM_011856    | Odz2          | - |
| DMM141  | Cdkn2a <sup>-/-</sup> _C57 | INS.SIN.LV.SF.GFP | LIVER | 11 | 43178838  | + | NM_001131054 | Pttg1         | - |
| DMM 141 | Cdkn2a <sup>-/-</sup> _C57 | INS.SIN.LV.SF.GFP | LIVER | 11 | 43520883  | + | NM_133795    | Ttc1          | - |
| DMM140  | Cdkn2a <sup>-/-</sup> _C57 | INS.SIN.LV.SF.GFP | LIVER | 11 | 45711832  | + | NM_001045520 | Clint1        | + |
| DMM140  | Cdkn2a <sup>-/-</sup> _C57 | INS.SIN.LV.SF.GFP | LIVER | 11 | 45906341  | + | NM_009616    | Adam19        | + |
| DMM146  | Cdkn2a <sup>-/-</sup> _C57 | INS.SIN.LV.SF.GFP | LIVER | 11 | 46967545  | + | NM_011891    | Sgcd          | - |
| DMM 134 | Cdkn2a <sup>-/-</sup> _C57 | INS.SIN.LV.SF.GFP | LIVER | 11 | 48608664  | + | NM_008143    | Gnb2l1        | + |
| DMM 128 | Cdkn2a <sup>-/-</sup> _C57 | INS.SIN.LV.SF.GFP | LIVER | 11 | 50130498  | + | NM_001110499 | Canx          | - |
| DMM140  | Cdkn2a <sup>-/-</sup> _C57 | INS.SIN.LV.SF.GFP | LIVER | 11 | 51618053  | + | NM_199299    | Phf15         | - |
| DMM140  | Cdkn2a <sup>-/-</sup> _C57 | INS.SIN.LV.SF.GFP | LIVER | 11 | 54271922  | + | NM_173753    | Fnip1         | + |
| DMM141  | Cdkn2a <sup>-/-</sup> _C57 | INS.SIN.LV.SF.GFP | LIVER | 11 | 62273815  | + | NM_001039536 | Pigl          | + |
| DMM 141 | Cdkn2a <sup>-/-</sup> _C57 | INS.SIN.LV.SF.GFP | LIVER | 11 | 65567921  | + | NM_009157    | Map2k4        | - |
| DMM 131 | Cdkn2a <sup>-/-</sup> _C57 | INS.SIN.LV.SF.GFP | LIVER | 11 | 65651957  | - | NM_001099633 | Dnahc9        | - |
| DMM133  | Cdkn2a <sup>-/-</sup> _C57 | INS.SIN.LV.SF.GFP | LIVER | 11 | 65658725  | + | NM_001099633 | Dnahc9        | - |
| DMM140  | Cdkn2a <sup>-/-</sup> _C57 | INS.SIN.LV.SF.GFP | LIVER | 11 | 67373917  | + | NM_008088    | Gas7          | + |
| DMM140  | Cdkn2a <sup>-/-</sup> _C57 | INS.SIN.LV.SF.GFP | LIVER | 11 | 67880376  | - | NM_018768    | Stx8          | + |
| DMM139  | Cdkn2a <sup>-/-</sup> _C57 | INS.SIN.LV.SF.GFP | LIVER | 11 | 67893237  | - | NM_018768    | Stx8          | + |
| DMM139  | Cdkn2a <sup>-/-</sup> _C57 | INS.SIN.LV.SF.GFP | LIVER | 11 | 70776385  | + | NM_001083331 | Nup88         | - |
| DMM140  | Cdkn2a <sup>-/-</sup> _C57 | INS.SIN.LV.SF.GFP | LIVER | 11 | 72897551  | + | NM_025818    | 1200014J11Rik | + |
| DMM 134 | Cdkn2a <sup>-/-</sup> _C57 | INS.SIN.LV.SF.GFP | LIVER | 11 | 73126234  | + | NM_023113    | Aspa          | - |
| DMM141  | Cdkn2a <sup>-/-</sup> _C57 | INS.SIN.LV.SF.GFP | LIVER | 11 | 73131581  | + | NM_023113    | Aspa          | - |
| DMM140  | Cdkn2a <sup>-/-</sup> _C57 | INS.SIN.LV.SF.GFP | LIVER | 11 | 75987019  | - | NM_026664    | Vps53         | - |
| DMM141  | Cdkn2a <sup>-/-</sup> _C57 | INS.SIN.LV.SF.GFP | LIVER | 11 | 77242310  | + | NM_177710    | Ssh2          | + |
| DMM146  | Cdkn2a <sup>-/-</sup> _C57 | INS.SIN.LV.SF.GFP | LIVER | 11 | 77374752  | + | NM_144825    | Taok1         | - |
| DMM 142 | Cdkn2a <sup>-/-</sup> _C57 | INS.SIN.LV.SF.GFP | LIVER | 11 | 78050839  | + | NM_009297    | Supt6h        | - |
| DMM146  | Cdkn2a <sup>-/-</sup> _C57 | INS.SIN.LV.SF.GFP | LIVER | 11 | 85370404  | + | NM_138681    | Bcas3         | + |
| DMM146  | Cdkn2a <sup>-/-</sup> _C57 | INS.SIN.LV.SF.GFP | LIVER | 11 | 85370552  | - | NM_138681    | Bcas3         | + |
| DMM 128 | Cdkn2a <sup>-/-</sup> _C57 | INS.SIN.LV.SF.GFP | LIVER | 11 | 86123399  | - | NM_001080931 | Med13         | - |
| DMM142  | Cdkn2a <sup>-/-</sup> _C57 | INS.SIN.LV.SF.GFP | LIVER | 11 | 86445614  | - | NM_029478    | Tmem49        | - |
| DMM141  | Cdkn2a <sup>-/-</sup> _C57 | INS.SIN.LV.SF.GFP | LIVER | 11 | 90507150  | - | NM_199008    | Cox11         | + |
| DMM140  | Cdkn2a <sup>-/-</sup> _C57 | INS.SIN.LV.SF.GFP | LIVER | 11 | 93892559  | - | NM_027569    | Spag9         | + |
| DMM140  | Cdkn2a <sup>-/-</sup> _C57 | INS.SIN.LV.SF.GFP | LIVER | 11 | 99085591  | - | NM_020618    | Smarce1       | - |
| DMM140  | Cdkn2a <sup>-/-</sup> _C57 | INS.SIN.LV.SF.GFP | LIVER | 11 | 100701972 | - | NM_001113563 | Stat5b        | - |
| DMM 134 | Cdkn2a <sup>-/-</sup> _C57 | INS.SIN.LV.SF.GFP | LIVER | 11 | 101539114 | + | NM_025404    | Arl4d         | + |
| DMM133  | Cdkn2a <sup>-/-</sup> _C57 | INS.SIN.LV.SF.GFP | LIVER | 11 | 103838570 | - | NM_007477    | Arf2          | + |

|         |                            |                   |       |    |           |   |              |               |   |
|---------|----------------------------|-------------------|-------|----|-----------|---|--------------|---------------|---|
| DMM139  | Cdkn2a <sup>-/-</sup> _C57 | INS.SIN.LV.SF.GFP | LIVER | 11 | 104233369 | - | NM_001081045 | 1700081L11Rik | - |
| DMM141  | Cdkn2a <sup>-/-</sup> _C57 | INS.SIN.LV.SF.GFP | LIVER | 11 | 105097491 | - | NM_001112705 | Ttk2          | + |
| DMM 134 | Cdkn2a <sup>-/-</sup> _C57 | INS.SIN.LV.SF.GFP | LIVER | 11 | 105954363 | + | NM_011947    | Map3k3        | + |
| DMM 132 | Cdkn2a <sup>-/-</sup> _C57 | INS.SIN.LV.SF.GFP | LIVER | 11 | 106376347 | + | NM_198292    | Tex2          | - |
| DMM140  | Cdkn2a <sup>-/-</sup> _C57 | INS.SIN.LV.SF.GFP | LIVER | 11 | 107038178 | - | NM_001161329 | Nol1          | - |
| DMM 128 | Cdkn2a <sup>-/-</sup> _C57 | INS.SIN.LV.SF.GFP | LIVER | 11 | 109963188 | - | NM_147220    | Abca9         | - |
| DMM 128 | Cdkn2a <sup>-/-</sup> _C57 | INS.SIN.LV.SF.GFP | LIVER | 11 | 109999656 | + | NM_147220    | Abca9         | - |
| DMM139  | Cdkn2a <sup>-/-</sup> _C57 | INS.SIN.LV.SF.GFP | LIVER | 11 | 110000678 | - | NM_147220    | Abca9         | - |
| DMM146  | Cdkn2a <sup>-/-</sup> _C57 | INS.SIN.LV.SF.GFP | LIVER | 11 | 110066225 | - | NM_147218    | Abca6         | - |
| DMM 134 | Cdkn2a <sup>-/-</sup> _C57 | INS.SIN.LV.SF.GFP | LIVER | 11 | 115067137 | - | NM_001033393 | Tmem104       | + |
| DMM140  | Cdkn2a <sup>-/-</sup> _C57 | INS.SIN.LV.SF.GFP | LIVER | 11 | 117614779 | - | NM_198022    | Tnrc6c        | + |
| DMM 134 | Cdkn2a <sup>-/-</sup> _C57 | INS.SIN.LV.SF.GFP | LIVER | 11 | 120282797 | - | NM_199469    | Nploc4        | - |
| DMM141  | Cdkn2a <sup>-/-</sup> _C57 | INS.SIN.LV.SF.GFP | LIVER | 12 | 3268911   | - | NM_016676    | Rab10         | - |
| DMM140  | Cdkn2a <sup>-/-</sup> _C57 | INS.SIN.LV.SF.GFP | LIVER | 12 | 3797262   | + | NM_007872    | Dnmt3a        | + |
| DMM141  | Cdkn2a <sup>-/-</sup> _C57 | INS.SIN.LV.SF.GFP | LIVER | 12 | 4631759   | - | NM_011365    | Itsn2         | + |
| DMM 139 | Cdkn2a <sup>-/-</sup> _C57 | INS.SIN.LV.SF.GFP | LIVER | 12 | 8326583   | + | NM_021429    | Hs1bp3        | + |
| DMM140  | Cdkn2a <sup>-/-</sup> _C57 | INS.SIN.LV.SF.GFP | LIVER | 12 | 8626912   | + | NM_177802    | Slc7a15       | - |
| DMM140  | Cdkn2a <sup>-/-</sup> _C57 | INS.SIN.LV.SF.GFP | LIVER | 12 | 8709069   | + | NM_030723    | Pum2          | + |
| DMM130  | Cdkn2a <sup>-/-</sup> _C57 | INS.SIN.LV.SF.GFP | LIVER | 12 | 8732333   | - | NM_001160219 | Pum2          | + |
| DMM134  | Cdkn2a <sup>-/-</sup> _C57 | INS.SIN.LV.SF.GFP | LIVER | 12 | 8846242   | + | NM_011519    | Sdc1          | + |
| DMM128  | Cdkn2a <sup>-/-</sup> _C57 | INS.SIN.LV.SF.GFP | LIVER | 12 | 11277886  | + | NM_025695    | Smc6          | + |
| DMM140  | Cdkn2a <sup>-/-</sup> _C57 | INS.SIN.LV.SF.GFP | LIVER | 12 | 12258929  | + | NM_001146119 | Fam49a        | + |
| DMM140  | Cdkn2a <sup>-/-</sup> _C57 | INS.SIN.LV.SF.GFP | LIVER | 12 | 12272683  | - | NM_001146119 | Fam49a        | + |
| DMM141  | Cdkn2a <sup>-/-</sup> _C57 | INS.SIN.LV.SF.GFP | LIVER | 12 | 13480100  | - | NM_134040    | Ddx1          | - |
| DMM128  | Cdkn2a <sup>-/-</sup> _C57 | INS.SIN.LV.SF.GFP | LIVER | 12 | 16932289  | + | NM_009072    | Rock2         | + |
| DMM141  | Cdkn2a <sup>-/-</sup> _C57 | INS.SIN.LV.SF.GFP | LIVER | 12 | 16942793  | + | NM_009072    | Rock2         | + |
| DMM 128 | Cdkn2a <sup>-/-</sup> _C57 | INS.SIN.LV.SF.GFP | LIVER | 12 | 21345040  | - | NM_009615    | Adam17        | - |
| DMM146  | Cdkn2a <sup>-/-</sup> _C57 | INS.SIN.LV.SF.GFP | LIVER | 12 | 21416297  | - | NM_011739    | Ywhaq         | - |
| DMM 134 | Cdkn2a <sup>-/-</sup> _C57 | INS.SIN.LV.SF.GFP | LIVER | 12 | 25394816  | - | NM_009104    | Rrm2          | + |
| DMM 142 | Cdkn2a <sup>-/-</sup> _C57 | INS.SIN.LV.SF.GFP | LIVER | 12 | 25666865  | - | NM_001081378 | Kidins220     | + |
| DMM 128 | Cdkn2a <sup>-/-</sup> _C57 | INS.SIN.LV.SF.GFP | LIVER | 12 | 29427194  | - | NM_001161410 | Ttc15         | - |
| DMM128  | Cdkn2a <sup>-/-</sup> _C57 | INS.SIN.LV.SF.GFP | LIVER | 12 | 29971430  | - | NM_001093775 | Myt1l         | + |
| DMM141  | Cdkn2a <sup>-/-</sup> _C57 | INS.SIN.LV.SF.GFP | LIVER | 12 | 31583561  | - | NM_001110239 | Acp1          | - |
| DMM134  | Cdkn2a <sup>-/-</sup> _C57 | INS.SIN.LV.SF.GFP | LIVER | 12 | 31590571  | + | NM_001110239 | Acp1          | - |
| DMM 139 | Cdkn2a <sup>-/-</sup> _C57 | INS.SIN.LV.SF.GFP | LIVER | 12 | 32020385  | + | NM_007861    | Dld           | - |

|         |                            |                   |       |    |          |   |              |               |   |
|---------|----------------------------|-------------------|-------|----|----------|---|--------------|---------------|---|
| DMM 149 | Cdkn2a <sup>-/-</sup> _C57 | INS.SIN.LV.SF.GFP | LIVER | 12 | 32554153 | - | NM_153198    | Hbp1          | - |
| DMM140  | Cdkn2a <sup>-/-</sup> _C57 | INS.SIN.LV.SF.GFP | LIVER | 12 | 34823092 | - | NM_011658    | Twist1        | + |
| DMM140  | Cdkn2a <sup>-/-</sup> _C57 | INS.SIN.LV.SF.GFP | LIVER | 12 | 34968752 | + | NM_024124    | Hdac9         | - |
| DMM130  | Cdkn2a <sup>-/-</sup> _C57 | INS.SIN.LV.SF.GFP | LIVER | 12 | 35550070 | - | NM_029294    | Prps11l       | + |
| DMM146  | Cdkn2a <sup>-/-</sup> _C57 | INS.SIN.LV.SF.GFP | LIVER | 12 | 36064921 | - | NM_013464    | Ahr           | - |
| DMM140  | Cdkn2a <sup>-/-</sup> _C57 | INS.SIN.LV.SF.GFP | LIVER | 12 | 36598907 | - | NM_207531    | Agr3          | + |
| DMM 141 | Cdkn2a <sup>-/-</sup> _C57 | INS.SIN.LV.SF.GFP | LIVER | 12 | 37033323 | + | NM_025312    | Sostdc1       | + |
| DMM141  | Cdkn2a <sup>-/-</sup> _C57 | INS.SIN.LV.SF.GFP | LIVER | 12 | 37243330 | - | NM_178629    | 4930579E17Rik | + |
| DMM 133 | Cdkn2a <sup>-/-</sup> _C57 | INS.SIN.LV.SF.GFP | LIVER | 12 | 37472936 | + | NM_178629    | 4930579E17Rik | + |
| DMM 130 | Cdkn2a <sup>-/-</sup> _C57 | INS.SIN.LV.SF.GFP | LIVER | 12 | 37983836 | + | NM_178767    | Tmem195       | + |
| DMM130  | Cdkn2a <sup>-/-</sup> _C57 | INS.SIN.LV.SF.GFP | LIVER | 12 | 37984131 | - | NM_178767    | Tmem195       | + |
| DMM139  | Cdkn2a <sup>-/-</sup> _C57 | INS.SIN.LV.SF.GFP | LIVER | 12 | 39319910 | + | NM_178681    | Dgkb          | + |
| DMM146  | Cdkn2a <sup>-/-</sup> _C57 | INS.SIN.LV.SF.GFP | LIVER | 12 | 39516497 | - | NM_007960    | Etv1          | + |
| DMM 142 | Cdkn2a <sup>-/-</sup> _C57 | INS.SIN.LV.SF.GFP | LIVER | 12 | 39583425 | - | NM_007960    | Etv1          | + |
| DMM140  | Cdkn2a <sup>-/-</sup> _C57 | INS.SIN.LV.SF.GFP | LIVER | 12 | 39586918 | - | NM_007960    | Etv1          | + |
| DMM140  | Cdkn2a <sup>-/-</sup> _C57 | INS.SIN.LV.SF.GFP | LIVER | 12 | 39597368 | + | NM_007960    | Etv1          | + |
| DMM 134 | Cdkn2a <sup>-/-</sup> _C57 | INS.SIN.LV.SF.GFP | LIVER | 12 | 39636386 | + | NM_007960    | Etv1          | + |
| DMM133  | Cdkn2a <sup>-/-</sup> _C57 | INS.SIN.LV.SF.GFP | LIVER | 12 | 39771249 | + | NM_007960    | Etv1          | + |
| DMM133  | Cdkn2a <sup>-/-</sup> _C57 | INS.SIN.LV.SF.GFP | LIVER | 12 | 39771291 | - | NM_007960    | Etv1          | + |
| DMM140  | Cdkn2a <sup>-/-</sup> _C57 | INS.SIN.LV.SF.GFP | LIVER | 12 | 40827069 | + | NM_001146196 | Scin          | - |
| DMM141  | Cdkn2a <sup>-/-</sup> _C57 | INS.SIN.LV.SF.GFP | LIVER | 12 | 41082709 | - | NM_172575    | Zfp277        | - |
| DMM134  | Cdkn2a <sup>-/-</sup> _C57 | INS.SIN.LV.SF.GFP | LIVER | 12 | 41268197 | + | NM_172803    | Dock4         | + |
| DMM 133 | Cdkn2a <sup>-/-</sup> _C57 | INS.SIN.LV.SF.GFP | LIVER | 12 | 41307098 | + | NM_172803    | Dock4         | + |
| DMM140  | Cdkn2a <sup>-/-</sup> _C57 | INS.SIN.LV.SF.GFP | LIVER | 12 | 41545186 | - | NM_172803    | Dock4         | + |
| DMM141  | Cdkn2a <sup>-/-</sup> _C57 | INS.SIN.LV.SF.GFP | LIVER | 12 | 41791809 | - | NM_053122    | Immp2l        | + |
| DMM146  | Cdkn2a <sup>-/-</sup> _C57 | INS.SIN.LV.SF.GFP | LIVER | 12 | 41961592 | + | NM_053122    | Immp2l        | + |
| DMM 128 | Cdkn2a <sup>-/-</sup> _C57 | INS.SIN.LV.SF.GFP | LIVER | 12 | 41963456 | + | NM_053122    | Immp2l        | + |
| DMM134  | Cdkn2a <sup>-/-</sup> _C57 | INS.SIN.LV.SF.GFP | LIVER | 12 | 42140533 | + | NM_053122    | Immp2l        | + |
| DMM 141 | Cdkn2a <sup>-/-</sup> _C57 | INS.SIN.LV.SF.GFP | LIVER | 12 | 42145312 | - | NM_053122    | Immp2l        | + |
| DMM141  | Cdkn2a <sup>-/-</sup> _C57 | INS.SIN.LV.SF.GFP | LIVER | 12 | 42980480 | + | NM_053122    | Immp2l        | + |
| DMM 141 | Cdkn2a <sup>-/-</sup> _C57 | INS.SIN.LV.SF.GFP | LIVER | 12 | 45390851 | + | NM_026164    | Pnpla8        | + |
| DMM141  | Cdkn2a <sup>-/-</sup> _C57 | INS.SIN.LV.SF.GFP | LIVER | 12 | 45408498 | - | NM_026164    | Pnpla8        | + |
| DMM140  | Cdkn2a <sup>-/-</sup> _C57 | INS.SIN.LV.SF.GFP | LIVER | 12 | 46010037 | + | NM_144552    | Stxbp6        | - |
| DMM134  | Cdkn2a <sup>-/-</sup> _C57 | INS.SIN.LV.SF.GFP | LIVER | 12 | 46023023 | - | NM_144552    | Stxbp6        | - |
| DMM141  | Cdkn2a <sup>-/-</sup> _C57 | INS.SIN.LV.SF.GFP | LIVER | 12 | 47974986 | + | NM_144552    | Stxbp6        | - |

|         |                            |                   |       |    |          |   |              |               |   |
|---------|----------------------------|-------------------|-------|----|----------|---|--------------|---------------|---|
| DMM128  | Cdkn2a <sup>-/-</sup> _C57 | INS.SIN.LV.SF.GFP | LIVER | 12 | 49063807 | - | NM_001160112 | Foxg1         | + |
| DMM140  | Cdkn2a <sup>-/-</sup> _C57 | INS.SIN.LV.SF.GFP | LIVER | 12 | 53948359 | - | NM_198111    | Akap6         | + |
| DMM141  | Cdkn2a <sup>-/-</sup> _C57 | INS.SIN.LV.SF.GFP | LIVER | 12 | 56021446 | - | NM_013815    | Baz1a         | - |
| DMM130  | Cdkn2a <sup>-/-</sup> _C57 | INS.SIN.LV.SF.GFP | LIVER | 12 | 58333816 | + | NM_001037746 | AU021838      | + |
| DMM128  | Cdkn2a <sup>-/-</sup> _C57 | INS.SIN.LV.SF.GFP | LIVER | 12 | 58343355 | + | NM_001037746 | AU021838      | + |
| DMM 134 | Cdkn2a <sup>-/-</sup> _C57 | INS.SIN.LV.SF.GFP | LIVER | 12 | 58410680 | - | NM_001037746 | AU021838      | + |
| DMM141  | Cdkn2a <sup>-/-</sup> _C57 | INS.SIN.LV.SF.GFP | LIVER | 12 | 60103146 | - | NM_009147    | Sec23a        | - |
| DMM140  | Cdkn2a <sup>-/-</sup> _C57 | INS.SIN.LV.SF.GFP | LIVER | 12 | 60260778 | + | NM_146034    | Ctage5        | + |
| DMM141  | Cdkn2a <sup>-/-</sup> _C57 | INS.SIN.LV.SF.GFP | LIVER | 12 | 60978259 | + | NM_001033156 | Fbxo33        | - |
| DMM128  | Cdkn2a <sup>-/-</sup> _C57 | INS.SIN.LV.SF.GFP | LIVER | 12 | 64699175 | - | NM_001025605 | Gm527         | + |
| DMM140  | Cdkn2a <sup>-/-</sup> _C57 | INS.SIN.LV.SF.GFP | LIVER | 12 | 66023897 | - | NM_001025605 | Gm527         | + |
| DMM134  | Cdkn2a <sup>-/-</sup> _C57 | INS.SIN.LV.SF.GFP | LIVER | 12 | 66062399 | - | NM_025707    | Klh128        | - |
| DMM 149 | Cdkn2a <sup>-/-</sup> _C57 | INS.SIN.LV.SF.GFP | LIVER | 12 | 66155702 | + | NM_177806    | Prpf39        | + |
| DMM 141 | Cdkn2a <sup>-/-</sup> _C57 | INS.SIN.LV.SF.GFP | LIVER | 12 | 66155995 | - | NM_177806    | Prpf39        | + |
| DMM141  | Cdkn2a <sup>-/-</sup> _C57 | INS.SIN.LV.SF.GFP | LIVER | 12 | 67759921 | - | NM_207010    | Mdga2         | - |
| DMM141  | Cdkn2a <sup>-/-</sup> _C57 | INS.SIN.LV.SF.GFP | LIVER | 12 | 75012914 | + | NM_010431    | Hif1a         | + |
| DMM146  | Cdkn2a <sup>-/-</sup> _C57 | INS.SIN.LV.SF.GFP | LIVER | 12 | 75024120 | - | NM_010431    | Hif1a         | + |
| DMM134  | Cdkn2a <sup>-/-</sup> _C57 | INS.SIN.LV.SF.GFP | LIVER | 12 | 78002259 | - | NM_145927    | Fntb          | + |
| DMM140  | Cdkn2a <sup>-/-</sup> _C57 | INS.SIN.LV.SF.GFP | LIVER | 12 | 78048468 | - | NM_001146176 | Max           | - |
| DMM140  | Cdkn2a <sup>-/-</sup> _C57 | INS.SIN.LV.SF.GFP | LIVER | 12 | 79341794 | - | NM_172952    | Gphn          | + |
| DMM140  | Cdkn2a <sup>-/-</sup> _C57 | INS.SIN.LV.SF.GFP | LIVER | 12 | 79789995 | + | NM_027597    | Fam71d        | + |
| DMM139  | Cdkn2a <sup>-/-</sup> _C57 | INS.SIN.LV.SF.GFP | LIVER | 12 | 79987912 | - | NM_026114    | Eif2s1        | + |
| DMM134  | Cdkn2a <sup>-/-</sup> _C57 | INS.SIN.LV.SF.GFP | LIVER | 12 | 83318432 | - | NM_172579    | Sipa111       | + |
| DMM134  | Cdkn2a <sup>-/-</sup> _C57 | INS.SIN.LV.SF.GFP | LIVER | 12 | 86576835 | - | NM_175337    | Mlh3          | - |
| DMM 134 | Cdkn2a <sup>-/-</sup> _C57 | INS.SIN.LV.SF.GFP | LIVER | 12 | 87417977 | + | NM_009368    | Tgfb3         | - |
| DMM146  | Cdkn2a <sup>-/-</sup> _C57 | INS.SIN.LV.SF.GFP | LIVER | 12 | 88596907 | - | NM_134044    | AI413782      | - |
| DMM139  | Cdkn2a <sup>-/-</sup> _C57 | INS.SIN.LV.SF.GFP | LIVER | 12 | 89620210 | - | NM_028105    | Adck1         | + |
| DMM 134 | Cdkn2a <sup>-/-</sup> _C57 | INS.SIN.LV.SF.GFP | LIVER | 12 | 89646419 | - | NM_028105    | Adck1         | + |
| DMM128  | Cdkn2a <sup>-/-</sup> _C57 | INS.SIN.LV.SF.GFP | LIVER | 12 | 89703247 | - | NM_028105    | Adck1         | + |
| DMM 142 | Cdkn2a <sup>-/-</sup> _C57 | INS.SIN.LV.SF.GFP | LIVER | 12 | 92260507 | + | NM_181815    | 4930534B04Rik | - |
| DMM 139 | Cdkn2a <sup>-/-</sup> _C57 | INS.SIN.LV.SF.GFP | LIVER | 12 | 92507148 | + | NM_181815    | 4930534B04Rik | - |
| DMM141  | Cdkn2a <sup>-/-</sup> _C57 | INS.SIN.LV.SF.GFP | LIVER | 12 | 92524860 | - | NM_181815    | 4930534B04Rik | - |
| DMM 128 | Cdkn2a <sup>-/-</sup> _C57 | INS.SIN.LV.SF.GFP | LIVER | 12 | 92583147 | + | NM_181815    | 4930534B04Rik | - |
| DMM141  | Cdkn2a <sup>-/-</sup> _C57 | INS.SIN.LV.SF.GFP | LIVER | 12 | 92599064 | - | NM_181815    | 4930534B04Rik | - |
| DMM140  | Cdkn2a <sup>-/-</sup> _C57 | INS.SIN.LV.SF.GFP | LIVER | 12 | 92606068 | + | NM_181815    | 4930534B04Rik | - |

|         |                            |                   |       |    |           |   |              |               |   |
|---------|----------------------------|-------------------|-------|----|-----------|---|--------------|---------------|---|
| DMM139  | Cdkn2a <sup>-/-</sup> _C57 | INS.SIN.LV.SF.GFP | LIVER | 12 | 92831881  | - | NM_175335    | Gtf2a1        | - |
| DMM141  | Cdkn2a <sup>-/-</sup> _C57 | INS.SIN.LV.SF.GFP | LIVER | 12 | 92960478  | + | NM_175367    | Ston2         | - |
| DMM 141 | Cdkn2a <sup>-/-</sup> _C57 | INS.SIN.LV.SF.GFP | LIVER | 12 | 94167947  | - | NM_001039089 | Sel11         | - |
| DMM 129 | Cdkn2a <sup>-/-</sup> _C57 | INS.SIN.LV.SF.GFP | LIVER | 12 | 95490760  | - | NM_201518    | Flrt2         | + |
| DMM 134 | Cdkn2a <sup>-/-</sup> _C57 | INS.SIN.LV.SF.GFP | LIVER | 12 | 96971281  | + | NM_201518    | Flrt2         | + |
| DMM146  | Cdkn2a <sup>-/-</sup> _C57 | INS.SIN.LV.SF.GFP | LIVER | 12 | 100951083 | - | NM_030172    | 2610021K21Rik | - |
| DMM140  | Cdkn2a <sup>-/-</sup> _C57 | INS.SIN.LV.SF.GFP | LIVER | 12 | 104112762 | + | NM_172806    | Btbd7         | - |
| DMM140  | Cdkn2a <sup>-/-</sup> _C57 | INS.SIN.LV.SF.GFP | LIVER | 12 | 107035034 | + | NM_011112    | Papola        | + |
| DMM 128 | Cdkn2a <sup>-/-</sup> _C57 | INS.SIN.LV.SF.GFP | LIVER | 12 | 110765585 | - | NR_027651    | Meg3          | + |
| DMM140  | Cdkn2a <sup>-/-</sup> _C57 | INS.SIN.LV.SF.GFP | LIVER | 12 | 117701114 | + | NM_133762    | Ncapg2        | + |
| DMM141  | Cdkn2a <sup>-/-</sup> _C57 | INS.SIN.LV.SF.GFP | LIVER | 12 | 120324904 | + | NM_177290    | Itgb8         | - |
| DMM128  | Cdkn2a <sup>-/-</sup> _C57 | INS.SIN.LV.SF.GFP | LIVER | 13 | 3607016   | + | NM_134063    | BC016423      | - |
| DMM141  | Cdkn2a <sup>-/-</sup> _C57 | INS.SIN.LV.SF.GFP | LIVER | 13 | 4629602   | - | NM_018859    | Akr1e1        | - |
| DMM128  | Cdkn2a <sup>-/-</sup> _C57 | INS.SIN.LV.SF.GFP | LIVER | 13 | 5528022   | - | NM_011803    | Klf6          | + |
| DMM134  | Cdkn2a <sup>-/-</sup> _C57 | INS.SIN.LV.SF.GFP | LIVER | 13 | 5635984   | + | NM_011803    | Klf6          | + |
| DMM141  | Cdkn2a <sup>-/-</sup> _C57 | INS.SIN.LV.SF.GFP | LIVER | 13 | 5826891   | - | NM_011803    | Klf6          | + |
| DMM 134 | Cdkn2a <sup>-/-</sup> _C57 | INS.SIN.LV.SF.GFP | LIVER | 13 | 8824074   | + | NM_001039388 | Wdr37         | - |
| DMM146  | Cdkn2a <sup>-/-</sup> _C57 | INS.SIN.LV.SF.GFP | LIVER | 13 | 8852754   | + | NM_001039389 | Wdr37         | - |
| DMM139  | Cdkn2a <sup>-/-</sup> _C57 | INS.SIN.LV.SF.GFP | LIVER | 13 | 9513247   | + | NM_001081426 | Dip2c         | + |
| DMM 142 | Cdkn2a <sup>-/-</sup> _C57 | INS.SIN.LV.SF.GFP | LIVER | 13 | 12002012  | - | NM_023868    | Ryr2          | - |
| DMM134  | Cdkn2a <sup>-/-</sup> _C57 | INS.SIN.LV.SF.GFP | LIVER | 13 | 12673021  | - | NM_026184    | Ero11b        | + |
| DMM130  | Cdkn2a <sup>-/-</sup> _C57 | INS.SIN.LV.SF.GFP | LIVER | 13 | 14163793  | + | NM_194262    | Arid4b        | + |
| DMM139  | Cdkn2a <sup>-/-</sup> _C57 | INS.SIN.LV.SF.GFP | LIVER | 13 | 14182653  | - | NM_194262    | Arid4b        | + |
| DMM128  | Cdkn2a <sup>-/-</sup> _C57 | INS.SIN.LV.SF.GFP | LIVER | 13 | 14196656  | + | NM_194262    | Arid4b        | + |
| DMM140  | Cdkn2a <sup>-/-</sup> _C57 | INS.SIN.LV.SF.GFP | LIVER | 13 | 14229863  | - | NM_194262    | Arid4b        | + |
| DMM134  | Cdkn2a <sup>-/-</sup> _C57 | INS.SIN.LV.SF.GFP | LIVER | 13 | 17524315  | + | NM_138654    | 5033411D12Rik | - |
| DMM134  | Cdkn2a <sup>-/-</sup> _C57 | INS.SIN.LV.SF.GFP | LIVER | 13 | 17824280  | + | NM_001081058 | Cdc215        | - |
| DMM 140 | Cdkn2a <sup>-/-</sup> _C57 | INS.SIN.LV.SF.GFP | LIVER | 13 | 18401130  | - | NM_175006    | Pou6f2        | - |
| DMM140  | Cdkn2a <sup>-/-</sup> _C57 | INS.SIN.LV.SF.GFP | LIVER | 13 | 18906860  | - | NM_172120    | Vps41         | + |
| DMM 134 | Cdkn2a <sup>-/-</sup> _C57 | INS.SIN.LV.SF.GFP | LIVER | 13 | 18930659  | + | NM_172120    | Vps41         | + |
| DMM140  | Cdkn2a <sup>-/-</sup> _C57 | INS.SIN.LV.SF.GFP | LIVER | 13 | 23835222  | - | NM_175653    | Hist1h3c      | - |
| DMM 139 | Cdkn2a <sup>-/-</sup> _C57 | INS.SIN.LV.SF.GFP | LIVER | 13 | 27343498  | + | NM_008865    | Pr13b1        | + |
| DMM128  | Cdkn2a <sup>-/-</sup> _C57 | INS.SIN.LV.SF.GFP | LIVER | 13 | 29422405  | - | NM_144536    | Cdkal1        | - |
| DMM134  | Cdkn2a <sup>-/-</sup> _C57 | INS.SIN.LV.SF.GFP | LIVER | 13 | 29928776  | + | NM_144536    | Cdkal1        | - |
| DMM140  | Cdkn2a <sup>-/-</sup> _C57 | INS.SIN.LV.SF.GFP | LIVER | 13 | 30912514  | + | NM_025588    | Exoc2         | - |

|         |                            |                   |       |    |          |   |              |               |   |
|---------|----------------------------|-------------------|-------|----|----------|---|--------------|---------------|---|
| DMM128  | Cdkn2a <sup>-/-</sup> _C57 | INS.SIN.LV.SF.GFP | LIVER | 13 | 37463455 | + | NM_010745    | Ly86          | + |
| DMM133  | Cdkn2a <sup>-/-</sup> _C57 | INS.SIN.LV.SF.GFP | LIVER | 13 | 38072646 | + | NM_025965    | Ssr1          | - |
| DMM134  | Cdkn2a <sup>-/-</sup> _C57 | INS.SIN.LV.SF.GFP | LIVER | 13 | 38723899 | + | NM_139063    | Muted         | - |
| DMM 142 | Cdkn2a <sup>-/-</sup> _C57 | INS.SIN.LV.SF.GFP | LIVER | 13 | 41488478 | + | NM_001111324 | Nedd9         | - |
| DMM141  | Cdkn2a <sup>-/-</sup> _C57 | INS.SIN.LV.SF.GFP | LIVER | 13 | 47304861 | - | NM_146042    | Rnf144b       | + |
| DMM140  | Cdkn2a <sup>-/-</sup> _C57 | INS.SIN.LV.SF.GFP | LIVER | 13 | 49620757 | + | NM_001012324 | Ecm2          | + |
| DMM140  | Cdkn2a <sup>-/-</sup> _C57 | INS.SIN.LV.SF.GFP | LIVER | 13 | 59106834 | - | NM_001025074 | Ntrk2         | + |
| DMM141  | Cdkn2a <sup>-/-</sup> _C57 | INS.SIN.LV.SF.GFP | LIVER | 13 | 59598454 | - | NM_001048008 | Agtpbp1       | - |
| DMM 142 | Cdkn2a <sup>-/-</sup> _C57 | INS.SIN.LV.SF.GFP | LIVER | 13 | 63652210 | + | NM_008957    | Ptch1         | - |
| DMM140  | Cdkn2a <sup>-/-</sup> _C57 | INS.SIN.LV.SF.GFP | LIVER | 13 | 63926229 | + | NM_023507    | 0610007P08Rik | + |
| DMM 134 | Cdkn2a <sup>-/-</sup> _C57 | INS.SIN.LV.SF.GFP | LIVER | 13 | 64492923 | + | NM_009984    | Ctsl          | - |
| DMM141  | Cdkn2a <sup>-/-</sup> _C57 | INS.SIN.LV.SF.GFP | LIVER | 13 | 67016852 | - | NM_025547    | Mterfd1       | - |
| DMM131  | Cdkn2a <sup>-/-</sup> _C57 | INS.SIN.LV.SF.GFP | LIVER | 13 | 67595599 | - | NM_001007575 | Zfp58         | - |
| DMM 149 | Cdkn2a <sup>-/-</sup> _C57 | INS.SIN.LV.SF.GFP | LIVER | 13 | 67629838 | - | NM_133228    | Zfp87         | - |
| DMM146  | Cdkn2a <sup>-/-</sup> _C57 | INS.SIN.LV.SF.GFP | LIVER | 13 | 74780919 | + | NM_030711    | Erap1         | + |
| DMM140  | Cdkn2a <sup>-/-</sup> _C57 | INS.SIN.LV.SF.GFP | LIVER | 13 | 74785589 | - | NM_030711    | Erap1         | + |
| DMM128  | Cdkn2a <sup>-/-</sup> _C57 | INS.SIN.LV.SF.GFP | LIVER | 13 | 75867931 | - | NM_138953    | Ell2          | + |
| DMM128  | Cdkn2a <sup>-/-</sup> _C57 | INS.SIN.LV.SF.GFP | LIVER | 13 | 75877589 | + | NM_138953    | Ell2          | + |
| DMM140  | Cdkn2a <sup>-/-</sup> _C57 | INS.SIN.LV.SF.GFP | LIVER | 13 | 75982662 | + | NM_053108    | Glr3          | + |
| DMM128  | Cdkn2a <sup>-/-</sup> _C57 | INS.SIN.LV.SF.GFP | LIVER | 13 | 76145048 | - | NM_001131068 | Rfesd         | - |
| DMM146  | Cdkn2a <sup>-/-</sup> _C57 | INS.SIN.LV.SF.GFP | LIVER | 13 | 76812231 | + | NM_030174    | Mctp1         | + |
| DMM 131 | Cdkn2a <sup>-/-</sup> _C57 | INS.SIN.LV.SF.GFP | LIVER | 13 | 77407758 | - | NM_001145676 | 2210408I21Rik | + |
| DMM140  | Cdkn2a <sup>-/-</sup> _C57 | INS.SIN.LV.SF.GFP | LIVER | 13 | 77871015 | + | NM_001145676 | 2210408I21Rik | + |
| DMM141  | Cdkn2a <sup>-/-</sup> _C57 | INS.SIN.LV.SF.GFP | LIVER | 13 | 77923727 | + | NM_001145676 | 2210408I21Rik | + |
| DMM 130 | Cdkn2a <sup>-/-</sup> _C57 | INS.SIN.LV.SF.GFP | LIVER | 13 | 81239425 | + | NM_054053    | Gpr98         | - |
| DMM140  | Cdkn2a <sup>-/-</sup> _C57 | INS.SIN.LV.SF.GFP | LIVER | 13 | 83200645 | - | NM_025282    | Mef2c         | + |
| DMM 128 | Cdkn2a <sup>-/-</sup> _C57 | INS.SIN.LV.SF.GFP | LIVER | 13 | 83764591 | + | NM_025282    | Mef2c         | + |
| DMM 135 | Cdkn2a <sup>-/-</sup> _C57 | INS.SIN.LV.SF.GFP | LIVER | 13 | 85356418 | + | NM_145452    | Rasa1         | - |
| DMM140  | Cdkn2a <sup>-/-</sup> _C57 | INS.SIN.LV.SF.GFP | LIVER | 13 | 85360348 | + | NM_145452    | Rasa1         | - |
| DMM146  | Cdkn2a <sup>-/-</sup> _C57 | INS.SIN.LV.SF.GFP | LIVER | 13 | 85389441 | - | NM_145452    | Rasa1         | - |
| DMM 141 | Cdkn2a <sup>-/-</sup> _C57 | INS.SIN.LV.SF.GFP | LIVER | 13 | 86184279 | - | NM_007749    | Cox7c         | - |
| DMM146  | Cdkn2a <sup>-/-</sup> _C57 | INS.SIN.LV.SF.GFP | LIVER | 13 | 88581936 | - | NM_001037987 | Edil3         | + |
| DMM140  | Cdkn2a <sup>-/-</sup> _C57 | INS.SIN.LV.SF.GFP | LIVER | 13 | 88881980 | - | NM_001037987 | Edil3         | + |
| DMM140  | Cdkn2a <sup>-/-</sup> _C57 | INS.SIN.LV.SF.GFP | LIVER | 13 | 90016552 | + | NM_028012    | Xrcc4         | - |
| DMM 141 | Cdkn2a <sup>-/-</sup> _C57 | INS.SIN.LV.SF.GFP | LIVER | 13 | 91319111 | - | NM_025770    | Atg10         | - |



|         |                            |                   |       |    |           |   |              |               |   |
|---------|----------------------------|-------------------|-------|----|-----------|---|--------------|---------------|---|
| DMM140  | Cdkn2a <sup>-/-</sup> _C57 | INS.SIN.LV.SF.GFP | LIVER | 13 | 91606536  | + | NM_024272    | Ssbp2         | + |
| DMM 134 | Cdkn2a <sup>-/-</sup> _C57 | INS.SIN.LV.SF.GFP | LIVER | 13 | 93475956  | + | NM_172588    | Serinc5       | + |
| DMM134  | Cdkn2a <sup>-/-</sup> _C57 | INS.SIN.LV.SF.GFP | LIVER | 13 | 102297704 | - | NM_001024955 | Pik3r1        | - |
| DMM140  | Cdkn2a <sup>-/-</sup> _C57 | INS.SIN.LV.SF.GFP | LIVER | 13 | 104937782 | + | NM_001093759 | 2410002O22Rik | - |
| DMM 132 | Cdkn2a <sup>-/-</sup> _C57 | INS.SIN.LV.SF.GFP | LIVER | 13 | 105025598 | - | NM_021790    | Cenpk         | + |
| DMM128  | Cdkn2a <sup>-/-</sup> _C57 | INS.SIN.LV.SF.GFP | LIVER | 13 | 105026818 | + | NM_021790    | Cenpk         | + |
| DMM 141 | Cdkn2a <sup>-/-</sup> _C57 | INS.SIN.LV.SF.GFP | LIVER | 13 | 105187037 | + | NM_001081020 | Adamts6       | + |
| DMM141  | Cdkn2a <sup>-/-</sup> _C57 | INS.SIN.LV.SF.GFP | LIVER | 13 | 105484061 | + | NM_026072    | Sdccag10      | - |
| DMM128  | Cdkn2a <sup>-/-</sup> _C57 | INS.SIN.LV.SF.GFP | LIVER | 13 | 106038221 | - | NM_027934    | Rnf180        | - |
| DMM128  | Cdkn2a <sup>-/-</sup> _C57 | INS.SIN.LV.SF.GFP | LIVER | 13 | 106080431 | - | NM_027934    | Rnf180        | - |
| DMM141  | Cdkn2a <sup>-/-</sup> _C57 | INS.SIN.LV.SF.GFP | LIVER | 13 | 107573500 | - | NM_029665    | Ipo11         | - |
| DMM128  | Cdkn2a <sup>-/-</sup> _C57 | INS.SIN.LV.SF.GFP | LIVER | 13 | 107775882 | - | NM_001145779 | Kif2a         | - |
| DMM 128 | Cdkn2a <sup>-/-</sup> _C57 | INS.SIN.LV.SF.GFP | LIVER | 13 | 108721634 | - | NM_145456    | Zswim6        | - |
| DMM 141 | Cdkn2a <sup>-/-</sup> _C57 | INS.SIN.LV.SF.GFP | LIVER | 13 | 110548058 | - | NM_011056    | Pde4d         | + |
| DMM128  | Cdkn2a <sup>-/-</sup> _C57 | INS.SIN.LV.SF.GFP | LIVER | 13 | 111386022 | - | NM_152804    | Plk2          | + |
| DMM130  | Cdkn2a <sup>-/-</sup> _C57 | INS.SIN.LV.SF.GFP | LIVER | 13 | 112240563 | + | NM_001122963 | Gbp1          | - |
| DMM146  | Cdkn2a <sup>-/-</sup> _C57 | INS.SIN.LV.SF.GFP | LIVER | 13 | 114119587 | - | NM_023612    | Esm1          | + |
| DMM146  | Cdkn2a <sup>-/-</sup> _C57 | INS.SIN.LV.SF.GFP | LIVER | 13 | 114194150 | - | NM_023612    | Esm1          | + |
| DMM128  | Cdkn2a <sup>-/-</sup> _C57 | INS.SIN.LV.SF.GFP | LIVER | 13 | 114762958 | + | NM_172595    | Arl15         | + |
| DMM141  | Cdkn2a <sup>-/-</sup> _C57 | INS.SIN.LV.SF.GFP | LIVER | 13 | 114764764 | - | NM_172595    | Arl15         | + |
| DMM146  | Cdkn2a <sup>-/-</sup> _C57 | INS.SIN.LV.SF.GFP | LIVER | 13 | 115084535 | + | NM_010887    | Ndufs4        | - |
| DMM140  | Cdkn2a <sup>-/-</sup> _C57 | INS.SIN.LV.SF.GFP | LIVER | 13 | 117683947 | + | NM_001081009 | Parp8         | - |
| DMM141  | Cdkn2a <sup>-/-</sup> _C57 | INS.SIN.LV.SF.GFP | LIVER | 13 | 117788721 | + | NM_001081009 | Parp8         | - |
| DMM 134 | Cdkn2a <sup>-/-</sup> _C57 | INS.SIN.LV.SF.GFP | LIVER | 13 | 118048976 | + | NM_010330    | Emb           | + |
| DMM140  | Cdkn2a <sup>-/-</sup> _C57 | INS.SIN.LV.SF.GFP | LIVER | 13 | 119327634 | + | NM_021556    | Mrps30        | - |
| DMM141  | Cdkn2a <sup>-/-</sup> _C57 | INS.SIN.LV.SF.GFP | LIVER | 13 | 119560747 | - | NM_008002    | Fgf10         | + |
| DMM140  | Cdkn2a <sup>-/-</sup> _C57 | INS.SIN.LV.SF.GFP | LIVER | 13 | 120083398 | - | NM_008710    | Nnt           | - |
| DMM146  | Cdkn2a <sup>-/-</sup> _C57 | INS.SIN.LV.SF.GFP | LIVER | 13 | 120115802 | + | NM_008710    | Nnt           | - |
| DMM 142 | Cdkn2a <sup>-/-</sup> _C57 | INS.SIN.LV.SF.GFP | LIVER | 14 | 8823057   | + | NM_007870    | Dnase113      | - |
| DMM140  | Cdkn2a <sup>-/-</sup> _C57 | INS.SIN.LV.SF.GFP | LIVER | 14 | 8952524   | - | NM_178279    | Pxk           | + |
| DMM 134 | Cdkn2a <sup>-/-</sup> _C57 | INS.SIN.LV.SF.GFP | LIVER | 14 | 8952821   | + | NM_178279    | Pxk           | + |
| DMM140  | Cdkn2a <sup>-/-</sup> _C57 | INS.SIN.LV.SF.GFP | LIVER | 14 | 10308521  | - | NM_010210    | Fhit          | - |
| DMM146  | Cdkn2a <sup>-/-</sup> _C57 | INS.SIN.LV.SF.GFP | LIVER | 14 | 10978288  | + | NM_010210    | Fhit          | - |
| DMM141  | Cdkn2a <sup>-/-</sup> _C57 | INS.SIN.LV.SF.GFP | LIVER | 14 | 13966903  | + | NM_177813    | Gm5087        | - |
| DMM 142 | Cdkn2a <sup>-/-</sup> _C57 | INS.SIN.LV.SF.GFP | LIVER | 14 | 14777284  | + | NM_025435    | Thoc7         | - |

|         |                            |                   |       |    |          |   |              |               |   |
|---------|----------------------------|-------------------|-------|----|----------|---|--------------|---------------|---|
| DMM 135 | Cdkn2a <sup>-/-</sup> _C57 | INS.SIN.LV.SF.GFP | LIVER | 14 | 14884004 | - | NM_139227    | Atxn7         | + |
| DMM 149 | Cdkn2a <sup>-/-</sup> _C57 | INS.SIN.LV.SF.GFP | LIVER | 14 | 15572544 | - | NM_001033270 | Slc4a7        | + |
| DMM140  | Cdkn2a <sup>-/-</sup> _C57 | INS.SIN.LV.SF.GFP | LIVER | 14 | 15593861 | - | NM_001033270 | Slc4a7        | + |
| DMM 149 | Cdkn2a <sup>-/-</sup> _C57 | INS.SIN.LV.SF.GFP | LIVER | 14 | 15594034 | - | NM_001033270 | Slc4a7        | + |
| DMM134  | Cdkn2a <sup>-/-</sup> _C57 | INS.SIN.LV.SF.GFP | LIVER | 14 | 15595791 | + | NM_001033270 | Slc4a7        | + |
| DMM140  | Cdkn2a <sup>-/-</sup> _C57 | INS.SIN.LV.SF.GFP | LIVER | 14 | 15614242 | - | NM_001033270 | Slc4a7        | + |
| DMM 149 | Cdkn2a <sup>-/-</sup> _C57 | INS.SIN.LV.SF.GFP | LIVER | 14 | 17122933 | + | NM_021504    | Ngly1         | + |
| DMM 134 | Cdkn2a <sup>-/-</sup> _C57 | INS.SIN.LV.SF.GFP | LIVER | 14 | 17242338 | + | NM_009409    | Top2b         | + |
| DMM146  | Cdkn2a <sup>-/-</sup> _C57 | INS.SIN.LV.SF.GFP | LIVER | 14 | 17850892 | + | NM_011243    | Rarb          | - |
| DMM141  | Cdkn2a <sup>-/-</sup> _C57 | INS.SIN.LV.SF.GFP | LIVER | 14 | 18551622 | + | NM_001113417 | Thrb          | + |
| DMM 128 | Cdkn2a <sup>-/-</sup> _C57 | INS.SIN.LV.SF.GFP | LIVER | 14 | 18668115 | + | NM_001113417 | Thrb          | + |
| DMM 134 | Cdkn2a <sup>-/-</sup> _C57 | INS.SIN.LV.SF.GFP | LIVER | 14 | 22024800 | + | NM_134079    | Adk           | + |
| DMM140  | Cdkn2a <sup>-/-</sup> _C57 | INS.SIN.LV.SF.GFP | LIVER | 14 | 23535551 | + | NM_028275    | 1700112E06Rik | + |
| DMM146  | Cdkn2a <sup>-/-</sup> _C57 | INS.SIN.LV.SF.GFP | LIVER | 14 | 24638979 | + | NM_010610    | Kcnma1        | - |
| DMM141  | Cdkn2a <sup>-/-</sup> _C57 | INS.SIN.LV.SF.GFP | LIVER | 14 | 27273442 | + | NM_032008    | Slmap         | - |
| DMM 141 | Cdkn2a <sup>-/-</sup> _C57 | INS.SIN.LV.SF.GFP | LIVER | 14 | 27425529 | + | NM_145969    | Fam116a       | + |
| DMM140  | Cdkn2a <sup>-/-</sup> _C57 | INS.SIN.LV.SF.GFP | LIVER | 14 | 27672952 | + | NM_080856    | Asb14         | + |
| DMM 134 | Cdkn2a <sup>-/-</sup> _C57 | INS.SIN.LV.SF.GFP | LIVER | 14 | 27676374 | - | NM_080856    | Asb14         | + |
| DMM140  | Cdkn2a <sup>-/-</sup> _C57 | INS.SIN.LV.SF.GFP | LIVER | 14 | 28251207 | - | NM_001114879 | D14Abbl1e     | + |
| DMM133  | Cdkn2a <sup>-/-</sup> _C57 | INS.SIN.LV.SF.GFP | LIVER | 14 | 31855133 | + | NM_001081251 | Pbrm1         | + |
| DMM141  | Cdkn2a <sup>-/-</sup> _C57 | INS.SIN.LV.SF.GFP | LIVER | 14 | 32155563 | + | NM_009796    | Capn7         | + |
| DMM140  | Cdkn2a <sup>-/-</sup> _C57 | INS.SIN.LV.SF.GFP | LIVER | 14 | 32562105 | + | NM_001024604 | Ankrd28       | - |
| DMM141  | Cdkn2a <sup>-/-</sup> _C57 | INS.SIN.LV.SF.GFP | LIVER | 14 | 35507707 | + | NM_001004436 | Wapal         | + |
| DMM139  | Cdkn2a <sup>-/-</sup> _C57 | INS.SIN.LV.SF.GFP | LIVER | 14 | 35539456 | - | NM_001004436 | Wapal         | + |
| DMM128  | Cdkn2a <sup>-/-</sup> _C57 | INS.SIN.LV.SF.GFP | LIVER | 14 | 35555987 | + | NM_001004436 | Wapal         | + |
| DMM146  | Cdkn2a <sup>-/-</sup> _C57 | INS.SIN.LV.SF.GFP | LIVER | 14 | 37715074 | + | NM_027045    | Gcap14        | - |
| DMM139  | Cdkn2a <sup>-/-</sup> _C57 | INS.SIN.LV.SF.GFP | LIVER | 14 | 37976951 | - | NM_078478    | Ghitm         | - |
| DMM141  | Cdkn2a <sup>-/-</sup> _C57 | INS.SIN.LV.SF.GFP | LIVER | 14 | 40199555 | - | NM_008734    | Nrg3          | - |
| DMM141  | Cdkn2a <sup>-/-</sup> _C57 | INS.SIN.LV.SF.GFP | LIVER | 14 | 45679909 | + | NM_008964    | Ptger2        | + |
| DMM141  | Cdkn2a <sup>-/-</sup> _C57 | INS.SIN.LV.SF.GFP | LIVER | 14 | 45921335 | + | NM_015774    | Ero11         | - |
| DMM140  | Cdkn2a <sup>-/-</sup> _C57 | INS.SIN.LV.SF.GFP | LIVER | 14 | 46255522 | - | NM_001039106 | Ddhd1         | - |
| DMM 134 | Cdkn2a <sup>-/-</sup> _C57 | INS.SIN.LV.SF.GFP | LIVER | 14 | 46282081 | + | NM_001039106 | Ddhd1         | - |
| DMM146  | Cdkn2a <sup>-/-</sup> _C57 | INS.SIN.LV.SF.GFP | LIVER | 14 | 48029505 | + | NM_001145949 | Dlgap5        | - |
| DMM140  | Cdkn2a <sup>-/-</sup> _C57 | INS.SIN.LV.SF.GFP | LIVER | 14 | 49662934 | - | NM_207214    | Exoc5         | - |
| DMM140  | Cdkn2a <sup>-/-</sup> _C57 | INS.SIN.LV.SF.GFP | LIVER | 14 | 49796285 | + | NM_001081430 | Nat12         | + |

|         |                            |                   |       |    |          |   |              |               |   |
|---------|----------------------------|-------------------|-------|----|----------|---|--------------|---------------|---|
| DMM146  | Cdkn2a <sup>-/-</sup> _C57 | INS.SIN.LV.SF.GFP | LIVER | 14 | 50983657 | + | NM_205819    | Tlr11         | + |
| DMM140  | Cdkn2a <sup>-/-</sup> _C57 | INS.SIN.LV.SF.GFP | LIVER | 14 | 51640013 | + | NM_029145    | Rnase10       | + |
| DMM134  | Cdkn2a <sup>-/-</sup> _C57 | INS.SIN.LV.SF.GFP | LIVER | 14 | 52698261 | - | NM_016884    | Hnrnpc        | - |
| DMM 128 | Cdkn2a <sup>-/-</sup> _C57 | INS.SIN.LV.SF.GFP | LIVER | 14 | 52702716 | + | NM_016884    | Hnrnpc        | - |
| DMM 141 | Cdkn2a <sup>-/-</sup> _C57 | INS.SIN.LV.SF.GFP | LIVER | 14 | 56193877 | - | NM_026808    | Fitm1         | + |
| DMM140  | Cdkn2a <sup>-/-</sup> _C57 | INS.SIN.LV.SF.GFP | LIVER | 14 | 57540367 | - | NM_029498    | Zmym2         | + |
| DMM134  | Cdkn2a <sup>-/-</sup> _C57 | INS.SIN.LV.SF.GFP | LIVER | 14 | 58273957 | - | NM_020506    | Xpo4          | - |
| DMM 149 | Cdkn2a <sup>-/-</sup> _C57 | INS.SIN.LV.SF.GFP | LIVER | 14 | 58430951 | + | NM_198605    | F630043A04Rik | - |
| DMM146  | Cdkn2a <sup>-/-</sup> _C57 | INS.SIN.LV.SF.GFP | LIVER | 14 | 58483325 | + | NM_029492    | Zdhhc20       | - |
| DMM141  | Cdkn2a <sup>-/-</sup> _C57 | INS.SIN.LV.SF.GFP | LIVER | 14 | 58616502 | + | NM_028643    | Efha1         | - |
| DMM134  | Cdkn2a <sup>-/-</sup> _C57 | INS.SIN.LV.SF.GFP | LIVER | 14 | 60845899 | - | NM_170591    | Nupl1         | - |
| DMM 134 | Cdkn2a <sup>-/-</sup> _C57 | INS.SIN.LV.SF.GFP | LIVER | 14 | 62248181 | - | NM_206974    | Kcnrg         | + |
| DMM 139 | Cdkn2a <sup>-/-</sup> _C57 | INS.SIN.LV.SF.GFP | LIVER | 14 | 65456328 | + | NM_177338    | Hmbox1        | - |
| DMM139  | Cdkn2a <sup>-/-</sup> _C57 | INS.SIN.LV.SF.GFP | LIVER | 14 | 65464983 | - | NM_177338    | Hmbox1        | - |
| DMM141  | Cdkn2a <sup>-/-</sup> _C57 | INS.SIN.LV.SF.GFP | LIVER | 14 | 68344960 | - | NM_001111028 | Kctd9         | + |
| DMM 142 | Cdkn2a <sup>-/-</sup> _C57 | INS.SIN.LV.SF.GFP | LIVER | 14 | 70463779 | + | NM_028560    | 1700081D17Rik | + |
| DMM140  | Cdkn2a <sup>-/-</sup> _C57 | INS.SIN.LV.SF.GFP | LIVER | 14 | 71260844 | - | NM_008115    | Gfra2         | + |
| DMM140  | Cdkn2a <sup>-/-</sup> _C57 | INS.SIN.LV.SF.GFP | LIVER | 14 | 71276635 | - | NM_008115    | Gfra2         | + |
| DMM128  | Cdkn2a <sup>-/-</sup> _C57 | INS.SIN.LV.SF.GFP | LIVER | 14 | 72959364 | - | NM_207636    | Fndc3a        | - |
| DMM141  | Cdkn2a <sup>-/-</sup> _C57 | INS.SIN.LV.SF.GFP | LIVER | 14 | 73613612 | - | NM_009029    | Rb1           | - |
| DMM140  | Cdkn2a <sup>-/-</sup> _C57 | INS.SIN.LV.SF.GFP | LIVER | 14 | 75716090 | - | NM_026083    | Zc3h13        | + |
| DMM139  | Cdkn2a <sup>-/-</sup> _C57 | INS.SIN.LV.SF.GFP | LIVER | 14 | 76141476 | - | NM_177381    | Cog3          | - |
| DMM140  | Cdkn2a <sup>-/-</sup> _C57 | INS.SIN.LV.SF.GFP | LIVER | 14 | 78253531 | - | NM_025384    | Dnajc15       | - |
| DMM140  | Cdkn2a <sup>-/-</sup> _C57 | INS.SIN.LV.SF.GFP | LIVER | 14 | 78377199 | + | NM_029495    | Epsti1        | + |
| DMM140  | Cdkn2a <sup>-/-</sup> _C57 | INS.SIN.LV.SF.GFP | LIVER | 14 | 79052992 | - | NM_001081336 | Dgkh          | - |
| DMM140  | Cdkn2a <sup>-/-</sup> _C57 | INS.SIN.LV.SF.GFP | LIVER | 14 | 79742530 | + | NM_025832    | Narg1l        | - |
| DMM141  | Cdkn2a <sup>-/-</sup> _C57 | INS.SIN.LV.SF.GFP | LIVER | 14 | 79784790 | + | NM_025832    | Narg1l        | - |
| DMM139  | Cdkn2a <sup>-/-</sup> _C57 | INS.SIN.LV.SF.GFP | LIVER | 14 | 79919737 | + | NM_007920    | Elf1          | + |
| DMM128  | Cdkn2a <sup>-/-</sup> _C57 | INS.SIN.LV.SF.GFP | LIVER | 14 | 80424645 | + | NM_001030294 | Olfm4         | + |
| DMM140  | Cdkn2a <sup>-/-</sup> _C57 | INS.SIN.LV.SF.GFP | LIVER | 14 | 81520204 | + | NM_001030294 | Olfm4         | + |
| DMM134  | Cdkn2a <sup>-/-</sup> _C57 | INS.SIN.LV.SF.GFP | LIVER | 14 | 84854401 | - | NM_001013753 | Pcdh17        | + |
| DMM 141 | Cdkn2a <sup>-/-</sup> _C57 | INS.SIN.LV.SF.GFP | LIVER | 14 | 87282797 | + | NM_019670    | Diap3         | - |
| DMM141  | Cdkn2a <sup>-/-</sup> _C57 | INS.SIN.LV.SF.GFP | LIVER | 14 | 87473135 | + | NM_019670    | Diap3         | - |
| DMM141  | Cdkn2a <sup>-/-</sup> _C57 | INS.SIN.LV.SF.GFP | LIVER | 14 | 87872368 | - | NM_172605    | Tdrd3         | + |
| DMM135  | Cdkn2a <sup>-/-</sup> _C57 | INS.SIN.LV.SF.GFP | LIVER | 14 | 90146380 | + | NR_002862    | Gm5088        | + |

|         |                            |                   |       |    |           |   |              |         |   |
|---------|----------------------------|-------------------|-------|----|-----------|---|--------------|---------|---|
| DMM141  | Cdkn2a <sup>-/-</sup> _C57 | INS.SIN.LV.SF.GFP | LIVER | 14 | 94048324  | - | NM_001081377 | Pcdh9   | - |
| DMM141  | Cdkn2a <sup>-/-</sup> _C57 | INS.SIN.LV.SF.GFP | LIVER | 14 | 94055687  | - | NM_001081377 | Pcdh9   | - |
| DMM128  | Cdkn2a <sup>-/-</sup> _C57 | INS.SIN.LV.SF.GFP | LIVER | 14 | 94248132  | + | NM_001081377 | Pcdh9   | - |
| DMM140  | Cdkn2a <sup>-/-</sup> _C57 | INS.SIN.LV.SF.GFP | LIVER | 14 | 98508985  | + | NM_001038610 | Dach1   | - |
| DMM139  | Cdkn2a <sup>-/-</sup> _C57 | INS.SIN.LV.SF.GFP | LIVER | 14 | 99593207  | - | NM_029320    | Pibf1   | + |
| DMM 134 | Cdkn2a <sup>-/-</sup> _C57 | INS.SIN.LV.SF.GFP | LIVER | 14 | 100200772 | - | NM_010636    | Klf12   | - |
| DMM 142 | Cdkn2a <sup>-/-</sup> _C57 | INS.SIN.LV.SF.GFP | LIVER | 14 | 102093213 | - | NM_016723    | Uchl3   | + |
| DMM128  | Cdkn2a <sup>-/-</sup> _C57 | INS.SIN.LV.SF.GFP | LIVER | 14 | 103592466 | - | NM_207215    | Mycbp2  | - |
| DMM 142 | Cdkn2a <sup>-/-</sup> _C57 | INS.SIN.LV.SF.GFP | LIVER | 14 | 104163519 | + | NM_001136061 | Ednrb   | - |
| DMM140  | Cdkn2a <sup>-/-</sup> _C57 | INS.SIN.LV.SF.GFP | LIVER | 14 | 104248450 | - | NM_001136061 | Ednrb   | - |
| DMM 128 | Cdkn2a <sup>-/-</sup> _C57 | INS.SIN.LV.SF.GFP | LIVER | 14 | 105546542 | - | NM_134077    | Rbm26   | - |
| DMM141  | Cdkn2a <sup>-/-</sup> _C57 | INS.SIN.LV.SF.GFP | LIVER | 14 | 105565954 | + | NM_134077    | Rbm26   | - |
| DMM140  | Cdkn2a <sup>-/-</sup> _C57 | INS.SIN.LV.SF.GFP | LIVER | 14 | 107068775 | - | NM_198601    | Trim52  | + |
| DMM139  | Cdkn2a <sup>-/-</sup> _C57 | INS.SIN.LV.SF.GFP | LIVER | 14 | 109270179 | - | NM_199065    | Slitrk1 | - |
| DMM130  | Cdkn2a <sup>-/-</sup> _C57 | INS.SIN.LV.SF.GFP | LIVER | 14 | 109864224 | - | NM_199065    | Slitrk1 | - |
| DMM 141 | Cdkn2a <sup>-/-</sup> _C57 | INS.SIN.LV.SF.GFP | LIVER | 14 | 115371421 | + | NM_175500    | Gpc5    | + |
| DMM141  | Cdkn2a <sup>-/-</sup> _C57 | INS.SIN.LV.SF.GFP | LIVER | 14 | 118033841 | + | NM_001079844 | Gpc6    | + |
| DMM 134 | Cdkn2a <sup>-/-</sup> _C57 | INS.SIN.LV.SF.GFP | LIVER | 14 | 118269756 | - | NM_001079844 | Gpc6    | + |
| DMM 142 | Cdkn2a <sup>-/-</sup> _C57 | INS.SIN.LV.SF.GFP | LIVER | 14 | 118562213 | + | NM_021434    | Gpr180  | + |
| DMM140  | Cdkn2a <sup>-/-</sup> _C57 | INS.SIN.LV.SF.GFP | LIVER | 14 | 118938212 | + | NM_001033336 | Abcc4   | - |
| DMM 142 | Cdkn2a <sup>-/-</sup> _C57 | INS.SIN.LV.SF.GFP | LIVER | 14 | 119018901 | - | NM_001033336 | Abcc4   | - |
| DMM 134 | Cdkn2a <sup>-/-</sup> _C57 | INS.SIN.LV.SF.GFP | LIVER | 14 | 120683643 | - | NM_175341    | Mbnl2   | + |
| DMM140  | Cdkn2a <sup>-/-</sup> _C57 | INS.SIN.LV.SF.GFP | LIVER | 14 | 122538720 | + | NM_080556    | Tm9sf2  | + |
| DMM146  | Cdkn2a <sup>-/-</sup> _C57 | INS.SIN.LV.SF.GFP | LIVER | 14 | 123036631 | - | NM_144844    | Pcca    | + |
| DMM140  | Cdkn2a <sup>-/-</sup> _C57 | INS.SIN.LV.SF.GFP | LIVER | 14 | 124401480 | + | NM_010201    | Fgf14   | - |
| DMM 141 | Cdkn2a <sup>-/-</sup> _C57 | INS.SIN.LV.SF.GFP | LIVER | 15 | 3214484   | + | NM_001042613 | Sepp1   | + |
| DMM 141 | Cdkn2a <sup>-/-</sup> _C57 | INS.SIN.LV.SF.GFP | LIVER | 15 | 3217418   | + | NM_001042613 | Sepp1   | + |
| DMM134  | Cdkn2a <sup>-/-</sup> _C57 | INS.SIN.LV.SF.GFP | LIVER | 15 | 3276624   | - | NM_010284    | Ghr     | - |
| DMM139  | Cdkn2a <sup>-/-</sup> _C57 | INS.SIN.LV.SF.GFP | LIVER | 15 | 5098329   | - | NM_001013367 | Prkaa1  | + |
| DMM 132 | Cdkn2a <sup>-/-</sup> _C57 | INS.SIN.LV.SF.GFP | LIVER | 15 | 5143012   | - | NM_026213    | Ttc33   | + |
| DMM141  | Cdkn2a <sup>-/-</sup> _C57 | INS.SIN.LV.SF.GFP | LIVER | 15 | 8389901   | - | NM_027707    | Nipbl   | - |
| DMM140  | Cdkn2a <sup>-/-</sup> _C57 | INS.SIN.LV.SF.GFP | LIVER | 15 | 9124724   | + | NM_177178    | Lmbrd2  | + |
| DMM135  | Cdkn2a <sup>-/-</sup> _C57 | INS.SIN.LV.SF.GFP | LIVER | 15 | 9450704   | - | NM_008372    | Il7r    | - |
| DMM140  | Cdkn2a <sup>-/-</sup> _C57 | INS.SIN.LV.SF.GFP | LIVER | 15 | 9620465   | + | NM_177123    | Spf2    | - |
| DMM140  | Cdkn2a <sup>-/-</sup> _C57 | INS.SIN.LV.SF.GFP | LIVER | 15 | 12086636  | + | NM_011767    | Zfr     | + |

|         |                            |                   |       |    |          |   |              |        |   |
|---------|----------------------------|-------------------|-------|----|----------|---|--------------|--------|---|
| DMM141  | Cdkn2a <sup>-/-</sup> _C57 | INS.SIN.LV.SF.GFP | LIVER | 15 | 12088189 | + | NM_011767    | Zfr    | + |
| DMM139  | Cdkn2a <sup>-/-</sup> _C57 | INS.SIN.LV.SF.GFP | LIVER | 15 | 12171948 | - | NM_172958    | Mtmr12 | + |
| DMM139  | Cdkn2a <sup>-/-</sup> _C57 | INS.SIN.LV.SF.GFP | LIVER | 15 | 13351557 | + | NM_007666    | Cdh6   | - |
| DMM 142 | Cdkn2a <sup>-/-</sup> _C57 | INS.SIN.LV.SF.GFP | LIVER | 15 | 14921576 | + | NM_009869    | Cdh9   | + |
| DMM130  | Cdkn2a <sup>-/-</sup> _C57 | INS.SIN.LV.SF.GFP | LIVER | 15 | 17529717 | + | NM_009869    | Cdh9   | + |
| DMM 130 | Cdkn2a <sup>-/-</sup> _C57 | INS.SIN.LV.SF.GFP | LIVER | 15 | 17529798 | + | NM_009869    | Cdh9   | + |
| DMM130  | Cdkn2a <sup>-/-</sup> _C57 | INS.SIN.LV.SF.GFP | LIVER | 15 | 17529837 | - | NM_009869    | Cdh9   | + |
| DMM141  | Cdkn2a <sup>-/-</sup> _C57 | INS.SIN.LV.SF.GFP | LIVER | 15 | 17532251 | - | NM_009869    | Cdh9   | + |
| DMM140  | Cdkn2a <sup>-/-</sup> _C57 | INS.SIN.LV.SF.GFP | LIVER | 15 | 17540984 | + | NM_009869    | Cdh9   | + |
| DMM 149 | Cdkn2a <sup>-/-</sup> _C57 | INS.SIN.LV.SF.GFP | LIVER | 15 | 19710521 | + | NM_009865    | Cdh10  | + |
| DMM140  | Cdkn2a <sup>-/-</sup> _C57 | INS.SIN.LV.SF.GFP | LIVER | 15 | 19767679 | + | NM_009865    | Cdh10  | + |
| DMM134  | Cdkn2a <sup>-/-</sup> _C57 | INS.SIN.LV.SF.GFP | LIVER | 15 | 19770294 | + | NM_022816    | Acot10 | - |
| DMM140  | Cdkn2a <sup>-/-</sup> _C57 | INS.SIN.LV.SF.GFP | LIVER | 15 | 19780485 | - | NM_022816    | Acot10 | - |
| DMM140  | Cdkn2a <sup>-/-</sup> _C57 | INS.SIN.LV.SF.GFP | LIVER | 15 | 19781425 | + | NM_022816    | Acot10 | - |
| DMM140  | Cdkn2a <sup>-/-</sup> _C57 | INS.SIN.LV.SF.GFP | LIVER | 15 | 19785059 | - | NM_022816    | Acot10 | - |
| DMM128  | Cdkn2a <sup>-/-</sup> _C57 | INS.SIN.LV.SF.GFP | LIVER | 15 | 25394058 | - | NR_027376    | Gm5468 | + |
| DMM141  | Cdkn2a <sup>-/-</sup> _C57 | INS.SIN.LV.SF.GFP | LIVER | 15 | 25617308 | + | NM_019472    | Myo10  | + |
| DMM141  | Cdkn2a <sup>-/-</sup> _C57 | INS.SIN.LV.SF.GFP | LIVER | 15 | 25652463 | - | NM_019472    | Myo10  | + |
| DMM140  | Cdkn2a <sup>-/-</sup> _C57 | INS.SIN.LV.SF.GFP | LIVER | 15 | 25926463 | - | NM_144523    | Zfp622 | + |
| DMM140  | Cdkn2a <sup>-/-</sup> _C57 | INS.SIN.LV.SF.GFP | LIVER | 15 | 27730895 | - | NM_001081302 | Trio   | - |
| DMM 142 | Cdkn2a <sup>-/-</sup> _C57 | INS.SIN.LV.SF.GFP | LIVER | 15 | 28331411 | + | NM_133365    | Dnahc5 | + |
| DMM141  | Cdkn2a <sup>-/-</sup> _C57 | INS.SIN.LV.SF.GFP | LIVER | 15 | 28332307 | - | NM_133365    | Dnahc5 | + |
| DMM146  | Cdkn2a <sup>-/-</sup> _C57 | INS.SIN.LV.SF.GFP | LIVER | 15 | 30403908 | + | NM_008729    | Ctnnd2 | + |
| DMM128  | Cdkn2a <sup>-/-</sup> _C57 | INS.SIN.LV.SF.GFP | LIVER | 15 | 30457130 | + | NM_008729    | Ctnnd2 | + |
| DMM 142 | Cdkn2a <sup>-/-</sup> _C57 | INS.SIN.LV.SF.GFP | LIVER | 15 | 30540300 | - | NM_008729    | Ctnnd2 | + |
| DMM140  | Cdkn2a <sup>-/-</sup> _C57 | INS.SIN.LV.SF.GFP | LIVER | 15 | 31407712 | + | NM_172606    | 6-Mar  | - |
| DMM134  | Cdkn2a <sup>-/-</sup> _C57 | INS.SIN.LV.SF.GFP | LIVER | 15 | 31442614 | - | NM_172606    | 6-Mar  | - |
| DMM 133 | Cdkn2a <sup>-/-</sup> _C57 | INS.SIN.LV.SF.GFP | LIVER | 15 | 33278517 | + | NM_018755    | Pgep   | + |
| DMM140  | Cdkn2a <sup>-/-</sup> _C57 | INS.SIN.LV.SF.GFP | LIVER | 15 | 34017152 | - | NM_026002    | Mtdh   | + |
| DMM134  | Cdkn2a <sup>-/-</sup> _C57 | INS.SIN.LV.SF.GFP | LIVER | 15 | 34913248 | - | NM_019635    | Stk3   | - |
| DMM 128 | Cdkn2a <sup>-/-</sup> _C57 | INS.SIN.LV.SF.GFP | LIVER | 15 | 35403379 | - | NM_177151    | Vps13b | + |
| DMM134  | Cdkn2a <sup>-/-</sup> _C57 | INS.SIN.LV.SF.GFP | LIVER | 15 | 35470947 | + | NM_177151    | Vps13b | + |
| DMM141  | Cdkn2a <sup>-/-</sup> _C57 | INS.SIN.LV.SF.GFP | LIVER | 15 | 35527597 | + | NM_177151    | Vps13b | + |
| DMM141  | Cdkn2a <sup>-/-</sup> _C57 | INS.SIN.LV.SF.GFP | LIVER | 15 | 35531603 | + | NM_177151    | Vps13b | + |
| DMM140  | Cdkn2a <sup>-/-</sup> _C57 | INS.SIN.LV.SF.GFP | LIVER | 15 | 35768718 | + | NM_177151    | Vps13b | + |

|         |                            |                   |       |    |          |   |              |               |   |
|---------|----------------------------|-------------------|-------|----|----------|---|--------------|---------------|---|
| DMM 145 | Cdkn2a <sup>-/-</sup> _C57 | INS.SIN.LV.SF.GFP | LIVER | 15 | 35854838 | + | NM_177151    | Vps13b        | + |
| DMM140  | Cdkn2a <sup>-/-</sup> _C57 | INS.SIN.LV.SF.GFP | LIVER | 15 | 38571633 | - | NM_025494    | Atp6v1c1      | + |
| DMM130  | Cdkn2a <sup>-/-</sup> _C57 | INS.SIN.LV.SF.GFP | LIVER | 15 | 38930033 | + | NM_172402    | Slc25a32      | - |
| DMM 130 | Cdkn2a <sup>-/-</sup> _C57 | INS.SIN.LV.SF.GFP | LIVER | 15 | 38930064 | - | NM_172402    | Slc25a32      | - |
| DMM140  | Cdkn2a <sup>-/-</sup> _C57 | INS.SIN.LV.SF.GFP | LIVER | 15 | 38959826 | - | NM_198606    | Wdsof1        | + |
| DMM140  | Cdkn2a <sup>-/-</sup> _C57 | INS.SIN.LV.SF.GFP | LIVER | 15 | 39772440 | + | NM_172814    | Lrp12         | - |
| DMM134  | Cdkn2a <sup>-/-</sup> _C57 | INS.SIN.LV.SF.GFP | LIVER | 15 | 39792362 | + | NM_172814    | Lrp12         | - |
| DMM140  | Cdkn2a <sup>-/-</sup> _C57 | INS.SIN.LV.SF.GFP | LIVER | 15 | 40185677 | - | NM_011766    | Zfpm2         | + |
| DMM 134 | Cdkn2a <sup>-/-</sup> _C57 | INS.SIN.LV.SF.GFP | LIVER | 15 | 40777018 | - | NM_011766    | Zfpm2         | + |
| DMM141  | Cdkn2a <sup>-/-</sup> _C57 | INS.SIN.LV.SF.GFP | LIVER | 15 | 41680026 | + | NM_001130163 | Oxr1          | + |
| DMM128  | Cdkn2a <sup>-/-</sup> _C57 | INS.SIN.LV.SF.GFP | LIVER | 15 | 42309153 | + | NM_009640    | Angpt1        | - |
| DMM128  | Cdkn2a <sup>-/-</sup> _C57 | INS.SIN.LV.SF.GFP | LIVER | 15 | 42310331 | - | NM_009640    | Angpt1        | - |
| DMM139  | Cdkn2a <sup>-/-</sup> _C57 | INS.SIN.LV.SF.GFP | LIVER | 15 | 43327622 | - | NM_025736    | Ttc35         | + |
| DMM146  | Cdkn2a <sup>-/-</sup> _C57 | INS.SIN.LV.SF.GFP | LIVER | 15 | 43414758 | - | NM_025736    | Ttc35         | + |
| DMM128  | Cdkn2a <sup>-/-</sup> _C57 | INS.SIN.LV.SF.GFP | LIVER | 15 | 44203713 | + | NM_001113554 | Nuded1        | - |
| DMM142  | Cdkn2a <sup>-/-</sup> _C57 | INS.SIN.LV.SF.GFP | LIVER | 15 | 44461092 | + | NM_019480    | Ebag9         | + |
| DMM142  | Cdkn2a <sup>-/-</sup> _C57 | INS.SIN.LV.SF.GFP | LIVER | 15 | 44461167 | - | NM_019480    | Ebag9         | + |
| DMM142  | Cdkn2a <sup>-/-</sup> _C57 | INS.SIN.LV.SF.GFP | LIVER | 15 | 44461282 | - | NM_019480    | Ebag9         | + |
| DMM128  | Cdkn2a <sup>-/-</sup> _C57 | INS.SIN.LV.SF.GFP | LIVER | 15 | 44470382 | - | NM_019480    | Ebag9         | + |
| DMM 149 | Cdkn2a <sup>-/-</sup> _C57 | INS.SIN.LV.SF.GFP | LIVER | 15 | 44492372 | + | NM_001032727 | 5730410E15Rik | - |
| DMM140  | Cdkn2a <sup>-/-</sup> _C57 | INS.SIN.LV.SF.GFP | LIVER | 15 | 49471949 | + | NM_001081391 | Csmd3         | - |
| DMM140  | Cdkn2a <sup>-/-</sup> _C57 | INS.SIN.LV.SF.GFP | LIVER | 15 | 49928621 | - | NM_032000    | Trps1         | - |
| DMM146  | Cdkn2a <sup>-/-</sup> _C57 | INS.SIN.LV.SF.GFP | LIVER | 15 | 50509000 | + | NM_032000    | Trps1         | - |
| DMM 128 | Cdkn2a <sup>-/-</sup> _C57 | INS.SIN.LV.SF.GFP | LIVER | 15 | 50578072 | - | NM_032000    | Trps1         | - |
| DMM141  | Cdkn2a <sup>-/-</sup> _C57 | INS.SIN.LV.SF.GFP | LIVER | 15 | 50586015 | + | NM_032000    | Trps1         | - |
| DMM146  | Cdkn2a <sup>-/-</sup> _C57 | INS.SIN.LV.SF.GFP | LIVER | 15 | 50644221 | + | NM_032000    | Trps1         | - |
| DMM139  | Cdkn2a <sup>-/-</sup> _C57 | INS.SIN.LV.SF.GFP | LIVER | 15 | 51826064 | - | NM_009009    | Rad21         | - |
| DMM139  | Cdkn2a <sup>-/-</sup> _C57 | INS.SIN.LV.SF.GFP | LIVER | 15 | 53136491 | + | NM_010162    | Ext1          | - |
| DMM134  | Cdkn2a <sup>-/-</sup> _C57 | INS.SIN.LV.SF.GFP | LIVER | 15 | 53162569 | + | NM_010162    | Ext1          | - |
| DMM140  | Cdkn2a <sup>-/-</sup> _C57 | INS.SIN.LV.SF.GFP | LIVER | 15 | 53391439 | + | NM_177225    | Samd12        | - |
| DMM140  | Cdkn2a <sup>-/-</sup> _C57 | INS.SIN.LV.SF.GFP | LIVER | 15 | 55297539 | - | NM_181277    | Col14a1       | + |
| DMM140  | Cdkn2a <sup>-/-</sup> _C57 | INS.SIN.LV.SF.GFP | LIVER | 15 | 55347582 | - | NM_181277    | Col14a1       | + |
| DMM140  | Cdkn2a <sup>-/-</sup> _C57 | INS.SIN.LV.SF.GFP | LIVER | 15 | 55398496 | + | NM_134092    | Mtbp          | + |
| DMM128  | Cdkn2a <sup>-/-</sup> _C57 | INS.SIN.LV.SF.GFP | LIVER | 15 | 56953426 | - | NM_172378    | BC026439      | - |
| DMM 141 | Cdkn2a <sup>-/-</sup> _C57 | INS.SIN.LV.SF.GFP | LIVER | 15 | 57988380 | - | NM_029734    | Wdyhv1        | + |

|         |                            |                   |       |    |           |   |              |               |   |
|---------|----------------------------|-------------------|-------|----|-----------|---|--------------|---------------|---|
| DMM 141 | Cdkn2a <sup>-/-</sup> _C57 | INS.SIN.LV.SF.GFP | LIVER | 15 | 58222860  | - | NM_027211    | Anxa13        | - |
| DMM128  | Cdkn2a <sup>-/-</sup> _C57 | INS.SIN.LV.SF.GFP | LIVER | 15 | 59229252  | - | NM_026746    | Nsmce2        | + |
| DMM139  | Cdkn2a <sup>-/-</sup> _C57 | INS.SIN.LV.SF.GFP | LIVER | 15 | 59279875  | - | NM_026746    | Nsmce2        | + |
| DMM 128 | Cdkn2a <sup>-/-</sup> _C57 | INS.SIN.LV.SF.GFP | LIVER | 15 | 60697211  | + | NM_001081067 | A1bg          | - |
| DMM141  | Cdkn2a <sup>-/-</sup> _C57 | INS.SIN.LV.SF.GFP | LIVER | 15 | 63773084  | + | NM_144846    | Fam49b        | - |
| DMM139  | Cdkn2a <sup>-/-</sup> _C57 | INS.SIN.LV.SF.GFP | LIVER | 15 | 63779669  | - | NM_144846    | Fam49b        | - |
| DMM 128 | Cdkn2a <sup>-/-</sup> _C57 | INS.SIN.LV.SF.GFP | LIVER | 15 | 64156306  | + | NM_010026    | Asap1         | - |
| DMM 139 | Cdkn2a <sup>-/-</sup> _C57 | INS.SIN.LV.SF.GFP | LIVER | 15 | 65648829  | + | NM_133766    | Efr3a         | + |
| DMM141  | Cdkn2a <sup>-/-</sup> _C57 | INS.SIN.LV.SF.GFP | LIVER | 15 | 65684072  | - | NM_133766    | Efr3a         | + |
| DMM 141 | Cdkn2a <sup>-/-</sup> _C57 | INS.SIN.LV.SF.GFP | LIVER | 15 | 66418481  | - | NM_001081409 | Phf2011       | + |
| DMM140  | Cdkn2a <sup>-/-</sup> _C57 | INS.SIN.LV.SF.GFP | LIVER | 15 | 68190220  | - | NM_001145888 | Zfat          | - |
| DMM140  | Cdkn2a <sup>-/-</sup> _C57 | INS.SIN.LV.SF.GFP | LIVER | 15 | 86088237  | - | NM_145476    | Tbc1d22a      | + |
| DMM 134 | Cdkn2a <sup>-/-</sup> _C57 | INS.SIN.LV.SF.GFP | LIVER | 15 | 86244593  | + | NM_145476    | Tbc1d22a      | + |
| DMM 134 | Cdkn2a <sup>-/-</sup> _C57 | INS.SIN.LV.SF.GFP | LIVER | 15 | 86244719  | - | NM_145476    | Tbc1d22a      | + |
| DMM130  | Cdkn2a <sup>-/-</sup> _C57 | INS.SIN.LV.SF.GFP | LIVER | 15 | 89870377  | + | NM_001033441 | Alg10b        | + |
| DMM 130 | Cdkn2a <sup>-/-</sup> _C57 | INS.SIN.LV.SF.GFP | LIVER | 15 | 90417801  | - | NM_025815    | Cpne8         | - |
| DMM 140 | Cdkn2a <sup>-/-</sup> _C57 | INS.SIN.LV.SF.GFP | LIVER | 15 | 90486673  | + | NM_001033851 | Cpne8         | - |
| DMM 134 | Cdkn2a <sup>-/-</sup> _C57 | INS.SIN.LV.SF.GFP | LIVER | 15 | 91013448  | - | NM_011994    | Abcd2         | - |
| DMM 131 | Cdkn2a <sup>-/-</sup> _C57 | INS.SIN.LV.SF.GFP | LIVER | 15 | 91166521  | + | NM_001033633 | Slc2a13       | - |
| DMM 128 | Cdkn2a <sup>-/-</sup> _C57 | INS.SIN.LV.SF.GFP | LIVER | 15 | 91519211  | - | NM_025730    | Lrrk2         | + |
| DMM140  | Cdkn2a <sup>-/-</sup> _C57 | INS.SIN.LV.SF.GFP | LIVER | 15 | 93133267  | + | NM_024189    | Yaf2          | - |
| DMM128  | Cdkn2a <sup>-/-</sup> _C57 | INS.SIN.LV.SF.GFP | LIVER | 15 | 93782894  | + | NM_177431    | Adams20       | - |
| DMM139  | Cdkn2a <sup>-/-</sup> _C57 | INS.SIN.LV.SF.GFP | LIVER | 15 | 95657705  | + | NM_175344    | Ano6          | + |
| DMM140  | Cdkn2a <sup>-/-</sup> _C57 | INS.SIN.LV.SF.GFP | LIVER | 15 | 96551312  | + | NM_175121    | Slc38a2       | - |
| DMM141  | Cdkn2a <sup>-/-</sup> _C57 | INS.SIN.LV.SF.GFP | LIVER | 15 | 98520173  | - | NM_172612    | Rnd1          | - |
| DMM128  | Cdkn2a <sup>-/-</sup> _C57 | INS.SIN.LV.SF.GFP | LIVER | 15 | 100476952 | + | NM_001033872 | BC004728      | - |
| DMM140  | Cdkn2a <sup>-/-</sup> _C57 | INS.SIN.LV.SF.GFP | LIVER | 16 | 3845840   | + | NM_001081217 | Zfp174        | + |
| DMM140  | Cdkn2a <sup>-/-</sup> _C57 | INS.SIN.LV.SF.GFP | LIVER | 16 | 3860517   | + | NM_001033159 | Zfp597        | - |
| DMM 133 | Cdkn2a <sup>-/-</sup> _C57 | INS.SIN.LV.SF.GFP | LIVER | 16 | 4073057   | + | NM_026508    | Trap1         | - |
| DMM140  | Cdkn2a <sup>-/-</sup> _C57 | INS.SIN.LV.SF.GFP | LIVER | 16 | 4102567   | - | NM_001025432 | Crebbp        | - |
| DMM146  | Cdkn2a <sup>-/-</sup> _C57 | INS.SIN.LV.SF.GFP | LIVER | 16 | 4103242   | + | NM_001025432 | Crebbp        | - |
| DMM140  | Cdkn2a <sup>-/-</sup> _C57 | INS.SIN.LV.SF.GFP | LIVER | 16 | 4403146   | + | NM_009624    | Adcy9         | - |
| DMM 149 | Cdkn2a <sup>-/-</sup> _C57 | INS.SIN.LV.SF.GFP | LIVER | 16 | 4787082   | - | NM_025670    | 5730403B10Rik | - |
| DMM 133 | Cdkn2a <sup>-/-</sup> _C57 | INS.SIN.LV.SF.GFP | LIVER | 16 | 7922877   | + | NM_029070    | Tmem114       | - |
| DMM141  | Cdkn2a <sup>-/-</sup> _C57 | INS.SIN.LV.SF.GFP | LIVER | 16 | 8843687   | - | NM_001081400 | 1810013L24Rik | + |

|         |                            |                   |       |    |          |   |              |               |   |
|---------|----------------------------|-------------------|-------|----|----------|---|--------------|---------------|---|
| DMM 146 | Cdkn2a <sup>-/-</sup> _C57 | INS.SIN.LV.SF.GFP | LIVER | 16 | 8845034  | - | NM_001081400 | 1810013L24Rik | + |
| DMM130  | Cdkn2a <sup>-/-</sup> _C57 | INS.SIN.LV.SF.GFP | LIVER | 16 | 11222936 | - | NM_001130008 | Gspt1         | - |
| DMM139  | Cdkn2a <sup>-/-</sup> _C57 | INS.SIN.LV.SF.GFP | LIVER | 16 | 13792022 | + | NM_001039521 | Rrn3          | + |
| DMM133  | Cdkn2a <sup>-/-</sup> _C57 | INS.SIN.LV.SF.GFP | LIVER | 16 | 13804147 | - | NM_001039521 | Rrn3          | + |
| DMM133  | Cdkn2a <sup>-/-</sup> _C57 | INS.SIN.LV.SF.GFP | LIVER | 16 | 13809339 | - | NM_001039521 | Rrn3          | + |
| DMM140  | Cdkn2a <sup>-/-</sup> _C57 | INS.SIN.LV.SF.GFP | LIVER | 16 | 16524785 | + | NM_139232    | Fgd4          | - |
| DMM140  | Cdkn2a <sup>-/-</sup> _C57 | INS.SIN.LV.SF.GFP | LIVER | 16 | 16555427 | + | NM_139232    | Fgd4          | - |
| DMM140  | Cdkn2a <sup>-/-</sup> _C57 | INS.SIN.LV.SF.GFP | LIVER | 16 | 22107997 | - | NM_183029    | Igf2bp2       | - |
| DMM 134 | Cdkn2a <sup>-/-</sup> _C57 | INS.SIN.LV.SF.GFP | LIVER | 16 | 24613334 | + | NM_001145952 | Lpp           | + |
| DMM 142 | Cdkn2a <sup>-/-</sup> _C57 | INS.SIN.LV.SF.GFP | LIVER | 16 | 24695508 | - | NM_001145952 | Lpp           | + |
| DMM134  | Cdkn2a <sup>-/-</sup> _C57 | INS.SIN.LV.SF.GFP | LIVER | 16 | 26343518 | + | NM_016674    | Cldn1         | - |
| DMM146  | Cdkn2a <sup>-/-</sup> _C57 | INS.SIN.LV.SF.GFP | LIVER | 16 | 27366075 | - | NM_198166    | Uts2d         | - |
| DMM128  | Cdkn2a <sup>-/-</sup> _C57 | INS.SIN.LV.SF.GFP | LIVER | 16 | 30330482 | + | NM_001128094 | Atp13a3       | - |
| DMM 134 | Cdkn2a <sup>-/-</sup> _C57 | INS.SIN.LV.SF.GFP | LIVER | 16 | 31834809 | - | NM_007862    | Dlg1          | + |
| DMM140  | Cdkn2a <sup>-/-</sup> _C57 | INS.SIN.LV.SF.GFP | LIVER | 16 | 35031728 | - | NM_023587    | Ptplb         | + |
| DMM140  | Cdkn2a <sup>-/-</sup> _C57 | INS.SIN.LV.SF.GFP | LIVER | 16 | 35331641 | + | NM_133704    | Sec22a        | - |
| DMM 128 | Cdkn2a <sup>-/-</sup> _C57 | INS.SIN.LV.SF.GFP | LIVER | 16 | 35697785 | + | NM_153550    | Dir2          | - |
| DMM 137 | Cdkn2a <sup>-/-</sup> _C57 | INS.SIN.LV.SF.GFP | LIVER | 16 | 36002525 | + | NM_008465    | Kpna1         | + |
| DMM140  | Cdkn2a <sup>-/-</sup> _C57 | INS.SIN.LV.SF.GFP | LIVER | 16 | 36648408 | - | NM_019388    | Cd86          | - |
| DMM140  | Cdkn2a <sup>-/-</sup> _C57 | INS.SIN.LV.SF.GFP | LIVER | 16 | 36669244 | + | NM_019388    | Cd86          | - |
| DMM 134 | Cdkn2a <sup>-/-</sup> _C57 | INS.SIN.LV.SF.GFP | LIVER | 16 | 36840556 | + | NM_177128    | Iqcb1         | + |
| DMM128  | Cdkn2a <sup>-/-</sup> _C57 | INS.SIN.LV.SF.GFP | LIVER | 16 | 36943339 | - | NM_008225    | Hcls1         | + |
| DMM140  | Cdkn2a <sup>-/-</sup> _C57 | INS.SIN.LV.SF.GFP | LIVER | 16 | 40827704 | + | NM_175548    | Lsamp         | + |
| DMM140  | Cdkn2a <sup>-/-</sup> _C57 | INS.SIN.LV.SF.GFP | LIVER | 16 | 41634198 | + | NM_175548    | Lsamp         | + |
| DMM128  | Cdkn2a <sup>-/-</sup> _C57 | INS.SIN.LV.SF.GFP | LIVER | 16 | 42887740 | - | NR_002445    | BC002163      | + |
| DMM135  | Cdkn2a <sup>-/-</sup> _C57 | INS.SIN.LV.SF.GFP | LIVER | 16 | 44777554 | - | NM_021325    | Cd200r1       | + |
| DMM141  | Cdkn2a <sup>-/-</sup> _C57 | INS.SIN.LV.SF.GFP | LIVER | 16 | 44786288 | - | NM_021325    | Cd200r1       | + |
| DMM139  | Cdkn2a <sup>-/-</sup> _C57 | INS.SIN.LV.SF.GFP | LIVER | 16 | 45164634 | + | NM_026402    | Atg3          | + |
| DMM 140 | Cdkn2a <sup>-/-</sup> _C57 | INS.SIN.LV.SF.GFP | LIVER | 16 | 47205388 | + | NM_021495    | Pvr13         | - |
| DMM141  | Cdkn2a <sup>-/-</sup> _C57 | INS.SIN.LV.SF.GFP | LIVER | 16 | 48767590 | + | NM_198297    | Trat1         | - |
| DMM140  | Cdkn2a <sup>-/-</sup> _C57 | INS.SIN.LV.SF.GFP | LIVER | 16 | 49433478 | - | NM_028680    | Ift57         | + |
| DMM140  | Cdkn2a <sup>-/-</sup> _C57 | INS.SIN.LV.SF.GFP | LIVER | 16 | 50019869 | - | NM_010581    | Cd47          | + |
| DMM141  | Cdkn2a <sup>-/-</sup> _C57 | INS.SIN.LV.SF.GFP | LIVER | 16 | 50219711 | - | NM_027444    | Bbx           | - |
| DMM 134 | Cdkn2a <sup>-/-</sup> _C57 | INS.SIN.LV.SF.GFP | LIVER | 16 | 50558706 | - | NM_027046    | Ccdc54        | - |
| DMM139  | Cdkn2a <sup>-/-</sup> _C57 | INS.SIN.LV.SF.GFP | LIVER | 16 | 52042186 | - | NM_001033238 | Cblb          | + |



|         |                            |                   |       |    |          |   |              |               |   |
|---------|----------------------------|-------------------|-------|----|----------|---|--------------|---------------|---|
| DMM140  | Cdkn2a <sup>-/-</sup> _C57 | INS.SIN.LV.SF.GFP | LIVER | 16 | 52879563 | - | NM_009655    | Alcam         | - |
| DMM140  | Cdkn2a <sup>-/-</sup> _C57 | INS.SIN.LV.SF.GFP | LIVER | 16 | 55547861 | - | NM_001159394 | Nfkbiz        | - |
| DMM140  | Cdkn2a <sup>-/-</sup> _C57 | INS.SIN.LV.SF.GFP | LIVER | 16 | 55984080 | - | NM_024218    | Rpl24         | + |
| DMM140  | Cdkn2a <sup>-/-</sup> _C57 | INS.SIN.LV.SF.GFP | LIVER | 16 | 56173064 | - | NM_001003971 | Senp7         | + |
| DMM130  | Cdkn2a <sup>-/-</sup> _C57 | INS.SIN.LV.SF.GFP | LIVER | 16 | 56688452 | + | NM_001014399 | Abi3bp        | + |
| DMM139  | Cdkn2a <sup>-/-</sup> _C57 | INS.SIN.LV.SF.GFP | LIVER | 16 | 57215202 | + | NM_026254    | Tbc1d23       | - |
| DMM 134 | Cdkn2a <sup>-/-</sup> _C57 | INS.SIN.LV.SF.GFP | LIVER | 16 | 57333733 | + | NM_025599    | 2610528E23Rik | - |
| DMM 141 | Cdkn2a <sup>-/-</sup> _C57 | INS.SIN.LV.SF.GFP | LIVER | 16 | 57442036 | - | NM_030163    | Filip11       | + |
| DMM128  | Cdkn2a <sup>-/-</sup> _C57 | INS.SIN.LV.SF.GFP | LIVER | 16 | 57695331 | - | NM_007739    | Col8a1        | - |
| DMM 128 | Cdkn2a <sup>-/-</sup> _C57 | INS.SIN.LV.SF.GFP | LIVER | 16 | 58477903 | - | NM_018784    | St3gal6       | - |
| DMM 140 | Cdkn2a <sup>-/-</sup> _C57 | INS.SIN.LV.SF.GFP | LIVER | 16 | 62863803 | + | NM_011173    | Pros1         | + |
| DMM 135 | Cdkn2a <sup>-/-</sup> _C57 | INS.SIN.LV.SF.GFP | LIVER | 16 | 63669811 | + | NM_010140    | Epha3         | - |
| DMM 149 | Cdkn2a <sup>-/-</sup> _C57 | INS.SIN.LV.SF.GFP | LIVER | 16 | 64803047 | + | NM_028059    | Zfp654        | - |
| DMM146  | Cdkn2a <sup>-/-</sup> _C57 | INS.SIN.LV.SF.GFP | LIVER | 16 | 64857473 | + | NM_178647    | Cggbp1        | + |
| DMM128  | Cdkn2a <sup>-/-</sup> _C57 | INS.SIN.LV.SF.GFP | LIVER | 16 | 65194388 | + | NM_008310    | Htr1f         | - |
| DMM140  | Cdkn2a <sup>-/-</sup> _C57 | INS.SIN.LV.SF.GFP | LIVER | 16 | 65352940 | - | NM_008849    | Pou1f1        | + |
| DMM 149 | Cdkn2a <sup>-/-</sup> _C57 | INS.SIN.LV.SF.GFP | LIVER | 16 | 65554549 | - | NM_026879    | Chmp2b        | - |
| DMM134  | Cdkn2a <sup>-/-</sup> _C57 | INS.SIN.LV.SF.GFP | LIVER | 16 | 65560463 | - | NM_026879    | Chmp2b        | - |
| DMM139  | Cdkn2a <sup>-/-</sup> _C57 | INS.SIN.LV.SF.GFP | LIVER | 16 | 65736773 | + | NM_026879    | Chmp2b        | - |
| DMM146  | Cdkn2a <sup>-/-</sup> _C57 | INS.SIN.LV.SF.GFP | LIVER | 16 | 70433951 | + | NM_028803    | Gbe1          | + |
| DMM140  | Cdkn2a <sup>-/-</sup> _C57 | INS.SIN.LV.SF.GFP | LIVER | 16 | 73603339 | - | NM_175549    | Robo2         | - |
| DMM128  | Cdkn2a <sup>-/-</sup> _C57 | INS.SIN.LV.SF.GFP | LIVER | 16 | 73758156 | + | NM_175549    | Robo2         | - |
| DMM140  | Cdkn2a <sup>-/-</sup> _C57 | INS.SIN.LV.SF.GFP | LIVER | 16 | 73957259 | - | NM_175549    | Robo2         | - |
| DMM140  | Cdkn2a <sup>-/-</sup> _C57 | INS.SIN.LV.SF.GFP | LIVER | 16 | 73965241 | - | NM_175549    | Robo2         | - |
| DMM 142 | Cdkn2a <sup>-/-</sup> _C57 | INS.SIN.LV.SF.GFP | LIVER | 16 | 74357248 | - | NM_175549    | Robo2         | - |
| DMM128  | Cdkn2a <sup>-/-</sup> _C57 | INS.SIN.LV.SF.GFP | LIVER | 16 | 75834222 | + | NM_023380    | Samsn1        | - |
| DMM134  | Cdkn2a <sup>-/-</sup> _C57 | INS.SIN.LV.SF.GFP | LIVER | 16 | 75871176 | - | NM_023380    | Samsn1        | - |
| DMM141  | Cdkn2a <sup>-/-</sup> _C57 | INS.SIN.LV.SF.GFP | LIVER | 16 | 75895208 | - | NM_023380    | Samsn1        | - |
| DMM 141 | Cdkn2a <sup>-/-</sup> _C57 | INS.SIN.LV.SF.GFP | LIVER | 16 | 76535448 | - | NM_173440    | Nrip1         | - |
| DMM128  | Cdkn2a <sup>-/-</sup> _C57 | INS.SIN.LV.SF.GFP | LIVER | 16 | 76542141 | + | NM_173440    | Nrip1         | - |
| DMM141  | Cdkn2a <sup>-/-</sup> _C57 | INS.SIN.LV.SF.GFP | LIVER | 16 | 76544451 | + | NM_173440    | Nrip1         | - |
| DMM 149 | Cdkn2a <sup>-/-</sup> _C57 | INS.SIN.LV.SF.GFP | LIVER | 16 | 77041251 | - | NM_013918    | Usp25         | + |
| DMM139  | Cdkn2a <sup>-/-</sup> _C57 | INS.SIN.LV.SF.GFP | LIVER | 16 | 77534456 | + | NM_013918    | Usp25         | + |
| DMM141  | Cdkn2a <sup>-/-</sup> _C57 | INS.SIN.LV.SF.GFP | LIVER | 16 | 77675336 | - | NM_013918    | Usp25         | + |
| DMM140  | Cdkn2a <sup>-/-</sup> _C57 | INS.SIN.LV.SF.GFP | LIVER | 16 | 78370811 | + | NR_002700    | Gm7334        | - |

|         |                            |                   |       |    |          |   |              |               |   |
|---------|----------------------------|-------------------|-------|----|----------|---|--------------|---------------|---|
| DMM 141 | Cdkn2a <sup>-/-</sup> _C57 | INS.SIN.LV.SF.GFP | LIVER | 16 | 78372651 | - | NR_002700    | Gm7334        | - |
| DMM 133 | Cdkn2a <sup>-/-</sup> _C57 | INS.SIN.LV.SF.GFP | LIVER | 16 | 80589818 | + | NM_001113208 | Ncam2         | + |
| DMM 139 | Cdkn2a <sup>-/-</sup> _C57 | INS.SIN.LV.SF.GFP | LIVER | 16 | 81337011 | - | NM_001113208 | Ncam2         | + |
| DMM134  | Cdkn2a <sup>-/-</sup> _C57 | INS.SIN.LV.SF.GFP | LIVER | 16 | 81362114 | - | NM_001113208 | Ncam2         | + |
| DMM128  | Cdkn2a <sup>-/-</sup> _C57 | INS.SIN.LV.SF.GFP | LIVER | 16 | 81419478 | - | NM_010954    | Ncam2         | + |
| DMM146  | Cdkn2a <sup>-/-</sup> _C57 | INS.SIN.LV.SF.GFP | LIVER | 16 | 81429975 | - | NM_010954    | Ncam2         | + |
| DMM140  | Cdkn2a <sup>-/-</sup> _C57 | INS.SIN.LV.SF.GFP | LIVER | 16 | 81433282 | + | NM_010954    | Ncam2         | + |
| DMM128  | Cdkn2a <sup>-/-</sup> _C57 | INS.SIN.LV.SF.GFP | LIVER | 16 | 81446257 | - | NM_010954    | Ncam2         | + |
| DMM140  | Cdkn2a <sup>-/-</sup> _C57 | INS.SIN.LV.SF.GFP | LIVER | 16 | 83557547 | - | NM_017404    | Mrpl39        | - |
| DMM128  | Cdkn2a <sup>-/-</sup> _C57 | INS.SIN.LV.SF.GFP | LIVER | 16 | 84720036 | - | NM_017404    | Mrpl39        | - |
| DMM140  | Cdkn2a <sup>-/-</sup> _C57 | INS.SIN.LV.SF.GFP | LIVER | 16 | 85055854 | - | NM_007471    | App           | - |
| DMM141  | Cdkn2a <sup>-/-</sup> _C57 | INS.SIN.LV.SF.GFP | LIVER | 16 | 85143330 | + | NM_007471    | App           | - |
| DMM 137 | Cdkn2a <sup>-/-</sup> _C57 | INS.SIN.LV.SF.GFP | LIVER | 16 | 92643803 | + | NM_001111021 | Runx1         | - |
| DMM133  | Cdkn2a <sup>-/-</sup> _C57 | INS.SIN.LV.SF.GFP | LIVER | 16 | 97764133 | - | NM_013606    | Mx2           | + |
| DMM139  | Cdkn2a <sup>-/-</sup> _C57 | INS.SIN.LV.SF.GFP | LIVER | 16 | 98108940 | - | NM_174847    | C2cd2         | - |
| DMM141  | Cdkn2a <sup>-/-</sup> _C57 | INS.SIN.LV.SF.GFP | LIVER | 17 | 3147817  | - | NR_003519    | D030013116Rik | - |
| DMM140  | Cdkn2a <sup>-/-</sup> _C57 | INS.SIN.LV.SF.GFP | LIVER | 17 | 4457032  | - | NM_001085355 | Arid1b        | + |
| DMM 134 | Cdkn2a <sup>-/-</sup> _C57 | INS.SIN.LV.SF.GFP | LIVER | 17 | 5126641  | + | NM_001085355 | Arid1b        | + |
| DMM139  | Cdkn2a <sup>-/-</sup> _C57 | INS.SIN.LV.SF.GFP | LIVER | 17 | 10496110 | + | NM_001159516 | Qk            | - |
| DMM140  | Cdkn2a <sup>-/-</sup> _C57 | INS.SIN.LV.SF.GFP | LIVER | 17 | 11052267 | - | NM_016694    | Park2         | + |
| DMM140  | Cdkn2a <sup>-/-</sup> _C57 | INS.SIN.LV.SF.GFP | LIVER | 17 | 11059841 | - | NM_016694    | Park2         | + |
| DMM134  | Cdkn2a <sup>-/-</sup> _C57 | INS.SIN.LV.SF.GFP | LIVER | 17 | 15653209 | + | NM_013684    | Tbp           | + |
| DMM 146 | Cdkn2a <sup>-/-</sup> _C57 | INS.SIN.LV.SF.GFP | LIVER | 17 | 15658194 | - | NM_008799    | Pcdcd2        | - |
| DMM140  | Cdkn2a <sup>-/-</sup> _C57 | INS.SIN.LV.SF.GFP | LIVER | 17 | 15847751 | + | NM_007690    | Chd1          | + |
| DMM141  | Cdkn2a <sup>-/-</sup> _C57 | INS.SIN.LV.SF.GFP | LIVER | 17 | 15869661 | + | NM_007690    | Chd1          | + |
| DMM139  | Cdkn2a <sup>-/-</sup> _C57 | INS.SIN.LV.SF.GFP | LIVER | 17 | 15955335 | - | NM_178615    | Rgmb          | - |
| DMM134  | Cdkn2a <sup>-/-</sup> _C57 | INS.SIN.LV.SF.GFP | LIVER | 17 | 21621595 | + | NM_013843    | Zfp53         | + |
| DMM 134 | Cdkn2a <sup>-/-</sup> _C57 | INS.SIN.LV.SF.GFP | LIVER | 17 | 29800635 | - | NM_028791    | 1300018105Rik | + |
| DMM 134 | Cdkn2a <sup>-/-</sup> _C57 | INS.SIN.LV.SF.GFP | LIVER | 17 | 35022851 | - | NM_013484    | C2            | - |
| DMM141  | Cdkn2a <sup>-/-</sup> _C57 | INS.SIN.LV.SF.GFP | LIVER | 17 | 37697044 | + | NM_001013575 | Olf112        | - |
| DMM134  | Cdkn2a <sup>-/-</sup> _C57 | INS.SIN.LV.SF.GFP | LIVER | 17 | 43072367 | + | NM_009847    | Cd2ap         | - |
| DMM141  | Cdkn2a <sup>-/-</sup> _C57 | INS.SIN.LV.SF.GFP | LIVER | 17 | 43223846 | - | NM_178589    | Tnfrsf21      | + |
| DMM 149 | Cdkn2a <sup>-/-</sup> _C57 | INS.SIN.LV.SF.GFP | LIVER | 17 | 44594887 | - | NM_001145920 | Runx2         | - |
| DMM140  | Cdkn2a <sup>-/-</sup> _C57 | INS.SIN.LV.SF.GFP | LIVER | 17 | 44944013 | - | NM_001146038 | Runx2         | - |
| DMM140  | Cdkn2a <sup>-/-</sup> _C57 | INS.SIN.LV.SF.GFP | LIVER | 17 | 46943485 | - | NM_001100452 | BC032203      | - |

|         |                            |                   |       |    |          |   |              |               |   |
|---------|----------------------------|-------------------|-------|----|----------|---|--------------|---------------|---|
| DMM140  | Cdkn2a <sup>-/-</sup> _C57 | INS.SIN.LV.SF.GFP | LIVER | 17 | 47094918 | + | NM_146078    | Ubr2          | - |
| DMM134  | Cdkn2a <sup>-/-</sup> _C57 | INS.SIN.LV.SF.GFP | LIVER | 17 | 53833055 | - | NM_028232    | Sgol1         | - |
| DMM141  | Cdkn2a <sup>-/-</sup> _C57 | INS.SIN.LV.SF.GFP | LIVER | 17 | 55958450 | + | NM_139138    | Emr4          | + |
| DMM 132 | Cdkn2a <sup>-/-</sup> _C57 | INS.SIN.LV.SF.GFP | LIVER | 17 | 56425357 | - | NM_025836    | M6prbp1       | - |
| DMM139  | Cdkn2a <sup>-/-</sup> _C57 | INS.SIN.LV.SF.GFP | LIVER | 17 | 57551821 | - | NM_010130    | Emr1          | + |
| DMM140  | Cdkn2a <sup>-/-</sup> _C57 | INS.SIN.LV.SF.GFP | LIVER | 17 | 62987237 | - | NM_010109    | Efna5         | - |
| DMM139  | Cdkn2a <sup>-/-</sup> _C57 | INS.SIN.LV.SF.GFP | LIVER | 17 | 64250485 | + | NM_001037997 | Fert2         | + |
| DMM128  | Cdkn2a <sup>-/-</sup> _C57 | INS.SIN.LV.SF.GFP | LIVER | 17 | 64370704 | - | NM_008000    | Fert2         | + |
| DMM 142 | Cdkn2a <sup>-/-</sup> _C57 | INS.SIN.LV.SF.GFP | LIVER | 17 | 64967478 | - | NM_008549    | Man2a1        | + |
| DMM 142 | Cdkn2a <sup>-/-</sup> _C57 | INS.SIN.LV.SF.GFP | LIVER | 17 | 65100951 | + | NM_008549    | Man2a1        | + |
| DMM140  | Cdkn2a <sup>-/-</sup> _C57 | INS.SIN.LV.SF.GFP | LIVER | 17 | 65196274 | + | NM_008549    | Man2a1        | + |
| DMM133  | Cdkn2a <sup>-/-</sup> _C57 | INS.SIN.LV.SF.GFP | LIVER | 17 | 65978997 | + | NM_001146002 | Txndc2        | - |
| DMM134  | Cdkn2a <sup>-/-</sup> _C57 | INS.SIN.LV.SF.GFP | LIVER | 17 | 67817110 | - | NM_008984    | Ptprm         | - |
| DMM133  | Cdkn2a <sup>-/-</sup> _C57 | INS.SIN.LV.SF.GFP | LIVER | 17 | 69513504 | - | NM_013813    | Epb4.113      | + |
| DMM140  | Cdkn2a <sup>-/-</sup> _C57 | INS.SIN.LV.SF.GFP | LIVER | 17 | 69560990 | + | NM_013813    | Epb4.113      | + |
| DMM141  | Cdkn2a <sup>-/-</sup> _C57 | INS.SIN.LV.SF.GFP | LIVER | 17 | 69770751 | + | NR_026848    | C030034I22Rik | + |
| DMM141  | Cdkn2a <sup>-/-</sup> _C57 | INS.SIN.LV.SF.GFP | LIVER | 17 | 71757000 | + | NM_028887    | Smchd1        | - |
| DMM140  | Cdkn2a <sup>-/-</sup> _C57 | INS.SIN.LV.SF.GFP | LIVER | 17 | 73309078 | + | NM_029999    | Lbh           | + |
| DMM140  | Cdkn2a <sup>-/-</sup> _C57 | INS.SIN.LV.SF.GFP | LIVER | 17 | 73407265 | - | NM_001081071 | Lclat1        | + |
| DMM140  | Cdkn2a <sup>-/-</sup> _C57 | INS.SIN.LV.SF.GFP | LIVER | 17 | 73482736 | + | NM_001081071 | Lclat1        | + |
| DMM140  | Cdkn2a <sup>-/-</sup> _C57 | INS.SIN.LV.SF.GFP | LIVER | 17 | 73492838 | - | NM_001081071 | Lclat1        | + |
| DMM146  | Cdkn2a <sup>-/-</sup> _C57 | INS.SIN.LV.SF.GFP | LIVER | 17 | 73536849 | + | NM_001081071 | Lclat1        | + |
| DMM133  | Cdkn2a <sup>-/-</sup> _C57 | INS.SIN.LV.SF.GFP | LIVER | 17 | 73562660 | - | NM_001081071 | Lclat1        | + |
| DMM 128 | Cdkn2a <sup>-/-</sup> _C57 | INS.SIN.LV.SF.GFP | LIVER | 17 | 74957374 | + | NM_007566    | Birc6         | + |
| DMM146  | Cdkn2a <sup>-/-</sup> _C57 | INS.SIN.LV.SF.GFP | LIVER | 17 | 75024026 | + | NM_007566    | Birc6         | + |
| DMM134  | Cdkn2a <sup>-/-</sup> _C57 | INS.SIN.LV.SF.GFP | LIVER | 17 | 75180258 | - | NM_152817    | Ttc27         | + |
| DMM141  | Cdkn2a <sup>-/-</sup> _C57 | INS.SIN.LV.SF.GFP | LIVER | 17 | 75268545 | - | NM_152817    | Ttc27         | + |
| DMM141  | Cdkn2a <sup>-/-</sup> _C57 | INS.SIN.LV.SF.GFP | LIVER | 17 | 79093482 | - | NM_011500    | Strn          | - |
| DMM140  | Cdkn2a <sup>-/-</sup> _C57 | INS.SIN.LV.SF.GFP | LIVER | 17 | 79130466 | + | NM_011500    | Strn          | - |
| DMM 149 | Cdkn2a <sup>-/-</sup> _C57 | INS.SIN.LV.SF.GFP | LIVER | 17 | 81004209 | + | NM_001081357 | Map4k3        | - |
| DMM 141 | Cdkn2a <sup>-/-</sup> _C57 | INS.SIN.LV.SF.GFP | LIVER | 17 | 81179123 | - | NM_001081357 | Map4k3        | - |
| DMM134  | Cdkn2a <sup>-/-</sup> _C57 | INS.SIN.LV.SF.GFP | LIVER | 17 | 82031778 | - | NM_001112798 | Slc8a1        | - |
| DMM140  | Cdkn2a <sup>-/-</sup> _C57 | INS.SIN.LV.SF.GFP | LIVER | 17 | 88431976 | - | NM_001081034 | Fbxo11        | - |
| DMM134  | Cdkn2a <sup>-/-</sup> _C57 | INS.SIN.LV.SF.GFP | LIVER | 17 | 88439654 | + | NM_001081034 | Fbxo11        | - |
| DMM 145 | Cdkn2a <sup>-/-</sup> _C57 | INS.SIN.LV.SF.GFP | LIVER | 17 | 88940972 | + | NM_028658    | Klraql        | + |

|         |                            |                   |       |    |          |   |              |               |   |
|---------|----------------------------|-------------------|-------|----|----------|---|--------------|---------------|---|
| DMM 142 | Cdkn2a <sup>-/-</sup> _C57 | INS.SIN.LV.SF.GFP | LIVER | 17 | 95138419 | + | NM_176917    | Mettl4        | - |
| DMM134  | Cdkn2a <sup>-/-</sup> _C57 | INS.SIN.LV.SF.GFP | LIVER | 18 | 3388530  | + | NM_029402    | Cul2          | + |
| DMM128  | Cdkn2a <sup>-/-</sup> _C57 | INS.SIN.LV.SF.GFP | LIVER | 18 | 3416041  | + | NM_029402    | Cul2          | + |
| DMM130  | Cdkn2a <sup>-/-</sup> _C57 | INS.SIN.LV.SF.GFP | LIVER | 18 | 4332353  | - | NM_007746    | Map3k8        | - |
| DMM 129 | Cdkn2a <sup>-/-</sup> _C57 | INS.SIN.LV.SF.GFP | LIVER | 18 | 4332383  | - | NM_007746    | Map3k8        | - |
| DMM141  | Cdkn2a <sup>-/-</sup> _C57 | INS.SIN.LV.SF.GFP | LIVER | 18 | 6143233  | - | NM_001039692 | Arhgap12      | - |
| DMM146  | Cdkn2a <sup>-/-</sup> _C57 | INS.SIN.LV.SF.GFP | LIVER | 18 | 6482904  | + | NM_027497    | Epc1          | - |
| DMM134  | Cdkn2a <sup>-/-</sup> _C57 | INS.SIN.LV.SF.GFP | LIVER | 18 | 6774786  | + | NM_181070    | Rab18         | + |
| DMM141  | Cdkn2a <sup>-/-</sup> _C57 | INS.SIN.LV.SF.GFP | LIVER | 18 | 7861252  | + | NR_027465    | Wac           | + |
| DMM146  | Cdkn2a <sup>-/-</sup> _C57 | INS.SIN.LV.SF.GFP | LIVER | 18 | 7886155  | + | NM_001146298 | Wac           | + |
| DMM128  | Cdkn2a <sup>-/-</sup> _C57 | INS.SIN.LV.SF.GFP | LIVER | 18 | 7904101  | - | NM_001146298 | Wac           | + |
| DMM141  | Cdkn2a <sup>-/-</sup> _C57 | INS.SIN.LV.SF.GFP | LIVER | 18 | 11850525 | - | NM_001081223 | Rbbp8         | + |
| DMM 141 | Cdkn2a <sup>-/-</sup> _C57 | INS.SIN.LV.SF.GFP | LIVER | 18 | 11890567 | + | NM_001081223 | Rbbp8         | + |
| DMM 134 | Cdkn2a <sup>-/-</sup> _C57 | INS.SIN.LV.SF.GFP | LIVER | 18 | 12820921 | - | NM_028341    | Ttc39c        | + |
| DMM141  | Cdkn2a <sup>-/-</sup> _C57 | INS.SIN.LV.SF.GFP | LIVER | 18 | 12943109 | - | NM_207530    | Osbp1a        | - |
| DMM 142 | Cdkn2a <sup>-/-</sup> _C57 | INS.SIN.LV.SF.GFP | LIVER | 18 | 13462864 | + | NM_153087    | Hrh4          | + |
| DMM 128 | Cdkn2a <sup>-/-</sup> _C57 | INS.SIN.LV.SF.GFP | LIVER | 18 | 14063416 | - | NM_145492    | Zfp521        | - |
| DMM140  | Cdkn2a <sup>-/-</sup> _C57 | INS.SIN.LV.SF.GFP | LIVER | 18 | 17743223 | - | NM_007664    | Cdh2          | - |
| DMM146  | Cdkn2a <sup>-/-</sup> _C57 | INS.SIN.LV.SF.GFP | LIVER | 18 | 17902213 | + | NM_007664    | Cdh2          | - |
| DMM 128 | Cdkn2a <sup>-/-</sup> _C57 | INS.SIN.LV.SF.GFP | LIVER | 18 | 20983390 | + | NM_029491    | D030074E01Rik | - |
| DMM139  | Cdkn2a <sup>-/-</sup> _C57 | INS.SIN.LV.SF.GFP | LIVER | 18 | 20993615 | + | NM_029491    | D030074E01Rik | - |
| DMM141  | Cdkn2a <sup>-/-</sup> _C57 | INS.SIN.LV.SF.GFP | LIVER | 18 | 21021310 | + | NM_029491    | D030074E01Rik | - |
| DMM141  | Cdkn2a <sup>-/-</sup> _C57 | INS.SIN.LV.SF.GFP | LIVER | 18 | 21169467 | - | NM_019706    | Rnf138        | + |
| DMM141  | Cdkn2a <sup>-/-</sup> _C57 | INS.SIN.LV.SF.GFP | LIVER | 18 | 23594023 | - | NM_010087    | Dtna          | + |
| DMM 141 | Cdkn2a <sup>-/-</sup> _C57 | INS.SIN.LV.SF.GFP | LIVER | 18 | 24790468 | + | NM_021448    | Elp2          | + |
| DMM140  | Cdkn2a <sup>-/-</sup> _C57 | INS.SIN.LV.SF.GFP | LIVER | 18 | 25509763 | - | NM_001033532 | AW554918      | + |
| DMM 134 | Cdkn2a <sup>-/-</sup> _C57 | INS.SIN.LV.SF.GFP | LIVER | 18 | 25601275 | - | NM_001033532 | AW554918      | + |
| DMM 134 | Cdkn2a <sup>-/-</sup> _C57 | INS.SIN.LV.SF.GFP | LIVER | 18 | 25606784 | - | NM_001033532 | AW554918      | + |
| DMM141  | Cdkn2a <sup>-/-</sup> _C57 | INS.SIN.LV.SF.GFP | LIVER | 18 | 25705415 | + | NM_001146292 | Brunol4       | - |
| DMM134  | Cdkn2a <sup>-/-</sup> _C57 | INS.SIN.LV.SF.GFP | LIVER | 18 | 31995008 | + | NM_028866    | Wdr33         | + |
| DMM140  | Cdkn2a <sup>-/-</sup> _C57 | INS.SIN.LV.SF.GFP | LIVER | 18 | 33027133 | - | NM_001110015 | Wdr36         | + |
| DMM141  | Cdkn2a <sup>-/-</sup> _C57 | INS.SIN.LV.SF.GFP | LIVER | 18 | 33359545 | - | NM_133774    | Stard4        | - |
| DMM128  | Cdkn2a <sup>-/-</sup> _C57 | INS.SIN.LV.SF.GFP | LIVER | 18 | 33377528 | + | NM_133774    | Stard4        | - |
| DMM146  | Cdkn2a <sup>-/-</sup> _C57 | INS.SIN.LV.SF.GFP | LIVER | 18 | 37970378 | - | NM_033581    | Pcdhgc3       | + |
| DMM140  | Cdkn2a <sup>-/-</sup> _C57 | INS.SIN.LV.SF.GFP | LIVER | 18 | 38088035 | - | NM_007858    | Diap1         | - |

|         |                            |                   |       |    |          |   |              |               |   |
|---------|----------------------------|-------------------|-------|----|----------|---|--------------|---------------|---|
| DMM 142 | Cdkn2a <sup>-/-</sup> _C57 | INS.SIN.LV.SF.GFP | LIVER | 18 | 39618650 | - | NM_008173    | Nr3c1         | - |
| DMM 141 | Cdkn2a <sup>-/-</sup> _C57 | INS.SIN.LV.SF.GFP | LIVER | 18 | 40375578 | - | NM_023311    | Yipf5         | - |
| DMM 134 | Cdkn2a <sup>-/-</sup> _C57 | INS.SIN.LV.SF.GFP | LIVER | 18 | 42392936 | - | NM_134137    | Lars          | - |
| DMM 142 | Cdkn2a <sup>-/-</sup> _C57 | INS.SIN.LV.SF.GFP | LIVER | 18 | 42406859 | - | NM_134137    | Lars          | - |
| DMM140  | Cdkn2a <sup>-/-</sup> _C57 | INS.SIN.LV.SF.GFP | LIVER | 18 | 45046228 | - | NM_001085373 | Mcc           | - |
| DMM 134 | Cdkn2a <sup>-/-</sup> _C57 | INS.SIN.LV.SF.GFP | LIVER | 18 | 50051501 | - | NM_001081371 | Dmxl1         | + |
| DMM141  | Cdkn2a <sup>-/-</sup> _C57 | INS.SIN.LV.SF.GFP | LIVER | 18 | 50055219 | - | NM_001081371 | Dmxl1         | + |
| DMM 134 | Cdkn2a <sup>-/-</sup> _C57 | INS.SIN.LV.SF.GFP | LIVER | 18 | 51460027 | - | NM_001081224 | Prr16         | + |
| DMM141  | Cdkn2a <sup>-/-</sup> _C57 | INS.SIN.LV.SF.GFP | LIVER | 18 | 51887078 | + | NM_001081224 | Prr16         | + |
| DMM 128 | Cdkn2a <sup>-/-</sup> _C57 | INS.SIN.LV.SF.GFP | LIVER | 18 | 52638737 | - | NM_026040    | Srfbp1        | + |
| DMM140  | Cdkn2a <sup>-/-</sup> _C57 | INS.SIN.LV.SF.GFP | LIVER | 18 | 52645226 | + | NM_026040    | Srfbp1        | + |
| DMM141  | Cdkn2a <sup>-/-</sup> _C57 | INS.SIN.LV.SF.GFP | LIVER | 18 | 54091469 | - | NM_152809    | Csnk1g3       | + |
| DMM 140 | Cdkn2a <sup>-/-</sup> _C57 | INS.SIN.LV.SF.GFP | LIVER | 18 | 55097475 | + | NM_175751    | Zfp608        | - |
| DMM141  | Cdkn2a <sup>-/-</sup> _C57 | INS.SIN.LV.SF.GFP | LIVER | 18 | 55358872 | + | NM_175751    | Zfp608        | - |
| DMM128  | Cdkn2a <sup>-/-</sup> _C57 | INS.SIN.LV.SF.GFP | LIVER | 18 | 55545361 | + | NM_175751    | Zfp608        | - |
| DMM140  | Cdkn2a <sup>-/-</sup> _C57 | INS.SIN.LV.SF.GFP | LIVER | 18 | 56703290 | + | NM_001127338 | Aldh7a1       | - |
| DMM134  | Cdkn2a <sup>-/-</sup> _C57 | INS.SIN.LV.SF.GFP | LIVER | 18 | 57752368 | - | NM_001134697 | Ctxn3         | + |
| DMM140  | Cdkn2a <sup>-/-</sup> _C57 | INS.SIN.LV.SF.GFP | LIVER | 18 | 58081821 | - | NM_009194    | Slc12a2       | + |
| DMM 131 | Cdkn2a <sup>-/-</sup> _C57 | INS.SIN.LV.SF.GFP | LIVER | 18 | 62700167 | - | NM_134136    | Fbxo38        | - |
| DMM128  | Cdkn2a <sup>-/-</sup> _C57 | INS.SIN.LV.SF.GFP | LIVER | 18 | 62891793 | + | NM_177829    | Spink10       | + |
| DMM140  | Cdkn2a <sup>-/-</sup> _C57 | INS.SIN.LV.SF.GFP | LIVER | 18 | 63142148 | - | NM_028017    | Napg          | + |
| DMM140  | Cdkn2a <sup>-/-</sup> _C57 | INS.SIN.LV.SF.GFP | LIVER | 18 | 63876175 | - | NM_001014981 | Wdr7          | + |
| DMM146  | Cdkn2a <sup>-/-</sup> _C57 | INS.SIN.LV.SF.GFP | LIVER | 18 | 63988574 | + | NM_001014981 | Wdr7          | + |
| DMM141  | Cdkn2a <sup>-/-</sup> _C57 | INS.SIN.LV.SF.GFP | LIVER | 18 | 65142226 | + | NM_001114386 | Nedd4l        | + |
| DMM140  | Cdkn2a <sup>-/-</sup> _C57 | INS.SIN.LV.SF.GFP | LIVER | 18 | 65357263 | - | NM_001114386 | Nedd4l        | + |
| DMM 140 | Cdkn2a <sup>-/-</sup> _C57 | INS.SIN.LV.SF.GFP | LIVER | 18 | 65816272 | - | NM_207255    | Zfp532        | + |
| DMM 129 | Cdkn2a <sup>-/-</sup> _C57 | INS.SIN.LV.SF.GFP | LIVER | 18 | 67117552 | - | NM_016977    | Mc4r          | - |
| DMM 140 | Cdkn2a <sup>-/-</sup> _C57 | INS.SIN.LV.SF.GFP | LIVER | 18 | 67650018 | - | NM_176832    | Spire1        | - |
| DMM146  | Cdkn2a <sup>-/-</sup> _C57 | INS.SIN.LV.SF.GFP | LIVER | 18 | 67948447 | + | NM_028112    | Seh1l         | + |
| DMM140  | Cdkn2a <sup>-/-</sup> _C57 | INS.SIN.LV.SF.GFP | LIVER | 18 | 67976543 | - | NM_001039088 | Seh1l         | + |
| DMM128  | Cdkn2a <sup>-/-</sup> _C57 | INS.SIN.LV.SF.GFP | LIVER | 18 | 69518019 | - | NM_001083967 | Tcf4          | + |
| DMM134  | Cdkn2a <sup>-/-</sup> _C57 | INS.SIN.LV.SF.GFP | LIVER | 18 | 70610684 | + | NM_172967    | 4930503L19Rik | - |
| DMM 134 | Cdkn2a <sup>-/-</sup> _C57 | INS.SIN.LV.SF.GFP | LIVER | 18 | 70668927 | + | NM_001136090 | Poli          | - |
| DMM141  | Cdkn2a <sup>-/-</sup> _C57 | INS.SIN.LV.SF.GFP | LIVER | 18 | 72695913 | - | NM_007831    | Dcc           | - |
| DMM128  | Cdkn2a <sup>-/-</sup> _C57 | INS.SIN.LV.SF.GFP | LIVER | 18 | 72837554 | - | NM_007831    | Dcc           | - |

|         |                            |                   |       |    |          |   |              |          |   |
|---------|----------------------------|-------------------|-------|----|----------|---|--------------|----------|---|
| DMM140  | Cdkn2a <sup>-/-</sup> _C57 | INS.SIN.LV.SF.GFP | LIVER | 18 | 76427633 | - | NM_010754    | Smad2    | + |
| DMM140  | Cdkn2a <sup>-/-</sup> _C57 | INS.SIN.LV.SF.GFP | LIVER | 18 | 76443134 | + | NM_010754    | Smad2    | + |
| DMM141  | Cdkn2a <sup>-/-</sup> _C57 | INS.SIN.LV.SF.GFP | LIVER | 18 | 77378473 | - | NM_008602    | Pias2    | + |
| DMM140  | Cdkn2a <sup>-/-</sup> _C57 | INS.SIN.LV.SF.GFP | LIVER | 18 | 78080184 | + | NM_013831    | Pstpip2  | + |
| DMM 134 | Cdkn2a <sup>-/-</sup> _C57 | INS.SIN.LV.SF.GFP | LIVER | 18 | 82789838 | - | NM_001025251 | Mbp      | + |
| DMM146  | Cdkn2a <sup>-/-</sup> _C57 | INS.SIN.LV.SF.GFP | LIVER | 18 | 84533340 | - | NM_177450    | Cndp1    | - |
| DMM140  | Cdkn2a <sup>-/-</sup> _C57 | INS.SIN.LV.SF.GFP | LIVER | 18 | 85015837 | - | NM_025797    | Cyb5     | + |
| DMM128  | Cdkn2a <sup>-/-</sup> _C57 | INS.SIN.LV.SF.GFP | LIVER | 18 | 88991193 | - | NM_018821    | Socs6    | - |
| DMM140  | Cdkn2a <sup>-/-</sup> _C57 | INS.SIN.LV.SF.GFP | LIVER | 18 | 89048101 | + | NM_018821    | Socs6    | - |
| DMM140  | Cdkn2a <sup>-/-</sup> _C57 | INS.SIN.LV.SF.GFP | LIVER | 18 | 89347580 | + | NM_001039149 | Cd226    | + |
| DMM140  | Cdkn2a <sup>-/-</sup> _C57 | INS.SIN.LV.SF.GFP | LIVER | 18 | 90686890 | + | NM_198295    | Tmx3     | + |
| DMM140  | Cdkn2a <sup>-/-</sup> _C57 | INS.SIN.LV.SF.GFP | LIVER | 18 | 90688528 | - | NM_198295    | Tmx3     | + |
| DMM 131 | Cdkn2a <sup>-/-</sup> _C57 | INS.SIN.LV.SF.GFP | LIVER | 19 | 3326461  | + | NM_013495    | Cpt1a    | + |
| DMM146  | Cdkn2a <sup>-/-</sup> _C57 | INS.SIN.LV.SF.GFP | LIVER | 19 | 3693939  | - | NM_008513    | Lrp5     | - |
| DMM 134 | Cdkn2a <sup>-/-</sup> _C57 | INS.SIN.LV.SF.GFP | LIVER | 19 | 8828753  | + | NM_019829    | Stx5a    | + |
| DMM141  | Cdkn2a <sup>-/-</sup> _C57 | INS.SIN.LV.SF.GFP | LIVER | 19 | 9051204  | - | NM_026007    | Eef1g    | + |
| DMM141  | Cdkn2a <sup>-/-</sup> _C57 | INS.SIN.LV.SF.GFP | LIVER | 19 | 9082803  | - | NM_009643    | Ahnak    | + |
| DMM139  | Cdkn2a <sup>-/-</sup> _C57 | INS.SIN.LV.SF.GFP | LIVER | 19 | 9092515  | - | NM_009643    | Ahnak    | + |
| DMM141  | Cdkn2a <sup>-/-</sup> _C57 | INS.SIN.LV.SF.GFP | LIVER | 19 | 11148137 | + | NM_022430    | Ms4a8a   | - |
| DMM140  | Cdkn2a <sup>-/-</sup> _C57 | INS.SIN.LV.SF.GFP | LIVER | 19 | 11466933 | + | NM_029499    | Ms4a4c   | + |
| DMM 128 | Cdkn2a <sup>-/-</sup> _C57 | INS.SIN.LV.SF.GFP | LIVER | 19 | 12103301 | + | NM_146680    | Olfr1423 | - |
| DMM140  | Cdkn2a <sup>-/-</sup> _C57 | INS.SIN.LV.SF.GFP | LIVER | 19 | 12859990 | - | NM_053009    | Zfp91    | - |
| DMM133  | Cdkn2a <sup>-/-</sup> _C57 | INS.SIN.LV.SF.GFP | LIVER | 19 | 12864651 | + | NM_053009    | Zfp91    | - |
| DMM141  | Cdkn2a <sup>-/-</sup> _C57 | INS.SIN.LV.SF.GFP | LIVER | 19 | 16151211 | + | NM_008139    | Gnaq     | + |
| DMM 141 | Cdkn2a <sup>-/-</sup> _C57 | INS.SIN.LV.SF.GFP | LIVER | 19 | 16323213 | + | NM_008139    | Gnaq     | + |
| DMM 134 | Cdkn2a <sup>-/-</sup> _C57 | INS.SIN.LV.SF.GFP | LIVER | 19 | 16753944 | - | NM_173028    | Vps13a   | - |
| DMM142  | Cdkn2a <sup>-/-</sup> _C57 | INS.SIN.LV.SF.GFP | LIVER | 19 | 16820450 | - | NM_173028    | Vps13a   | - |
| DMM139  | Cdkn2a <sup>-/-</sup> _C57 | INS.SIN.LV.SF.GFP | LIVER | 19 | 18677317 | - | NM_017375    | Ostf1    | - |
| DMM134  | Cdkn2a <sup>-/-</sup> _C57 | INS.SIN.LV.SF.GFP | LIVER | 19 | 19179147 | - | NM_001043354 | Rorb     | - |
| DMM140  | Cdkn2a <sup>-/-</sup> _C57 | INS.SIN.LV.SF.GFP | LIVER | 19 | 20455514 | + | NM_010730    | Anxa1    | - |
| DMM128  | Cdkn2a <sup>-/-</sup> _C57 | INS.SIN.LV.SF.GFP | LIVER | 19 | 21763176 | - | NM_146096    | Fam108b  | + |
| DMM128  | Cdkn2a <sup>-/-</sup> _C57 | INS.SIN.LV.SF.GFP | LIVER | 19 | 23070372 | - | NM_177341    | Trpm3    | + |
| DMM 141 | Cdkn2a <sup>-/-</sup> _C57 | INS.SIN.LV.SF.GFP | LIVER | 19 | 23346027 | - | NM_153808    | Smc5     | - |
| DMM140  | Cdkn2a <sup>-/-</sup> _C57 | INS.SIN.LV.SF.GFP | LIVER | 19 | 25169054 | - | NM_028785    | Dock8    | + |
| DMM 134 | Cdkn2a <sup>-/-</sup> _C57 | INS.SIN.LV.SF.GFP | LIVER | 19 | 25227532 | + | NM_028785    | Dock8    | + |

|         |                            |                   |       |    |          |   |              |               |   |
|---------|----------------------------|-------------------|-------|----|----------|---|--------------|---------------|---|
| DMM 142 | Cdkn2a <sup>-/-</sup> _C57 | INS.SIN.LV.SF.GFP | LIVER | 19 | 27488043 | - | NM_177474    | D19Bwg1357e   | - |
| DMM140  | Cdkn2a <sup>-/-</sup> _C57 | INS.SIN.LV.SF.GFP | LIVER | 19 | 30143781 | - | NM_144873    | Uhrf2         | + |
| DMM 134 | Cdkn2a <sup>-/-</sup> _C57 | INS.SIN.LV.SF.GFP | LIVER | 19 | 32410346 | - | NM_144792    | Sgms1         | - |
| DMM140  | Cdkn2a <sup>-/-</sup> _C57 | INS.SIN.LV.SF.GFP | LIVER | 19 | 32448033 | - | NM_010799    | Minpp1        | + |
| DMM134  | Cdkn2a <sup>-/-</sup> _C57 | INS.SIN.LV.SF.GFP | LIVER | 19 | 32843055 | - | NM_008960    | Pten          | + |
| DMM141  | Cdkn2a <sup>-/-</sup> _C57 | INS.SIN.LV.SF.GFP | LIVER | 19 | 32844130 | - | NM_008960    | Pten          | + |
| DMM146  | Cdkn2a <sup>-/-</sup> _C57 | INS.SIN.LV.SF.GFP | LIVER | 19 | 32844505 | - | NM_008960    | Pten          | + |
| DMM140  | Cdkn2a <sup>-/-</sup> _C57 | INS.SIN.LV.SF.GFP | LIVER | 19 | 32846442 | - | NM_008960    | Pten          | + |
| DMM140  | Cdkn2a <sup>-/-</sup> _C57 | INS.SIN.LV.SF.GFP | LIVER | 19 | 32872376 | + | NM_008960    | Pten          | + |
| DMM 133 | Cdkn2a <sup>-/-</sup> _C57 | INS.SIN.LV.SF.GFP | LIVER | 19 | 32874395 | + | NM_008960    | Pten          | + |
| DMM140  | Cdkn2a <sup>-/-</sup> _C57 | INS.SIN.LV.SF.GFP | LIVER | 19 | 32892366 | - | NM_008960    | Pten          | + |
| DMM146  | Cdkn2a <sup>-/-</sup> _C57 | INS.SIN.LV.SF.GFP | LIVER | 19 | 32892465 | + | NM_008960    | Pten          | + |
| DMM128  | Cdkn2a <sup>-/-</sup> _C57 | INS.SIN.LV.SF.GFP | LIVER | 19 | 32892502 | + | NM_008960    | Pten          | + |
| DMM146  | Cdkn2a <sup>-/-</sup> _C57 | INS.SIN.LV.SF.GFP | LIVER | 19 | 32947893 | - | NM_008960    | Pten          | + |
| DMM141  | Cdkn2a <sup>-/-</sup> _C57 | INS.SIN.LV.SF.GFP | LIVER | 19 | 32960074 | - | NM_008960    | Pten          | + |
| DMM146  | Cdkn2a <sup>-/-</sup> _C57 | INS.SIN.LV.SF.GFP | LIVER | 19 | 33081410 | + | NM_001146342 | Rnls          | - |
| DMM141  | Cdkn2a <sup>-/-</sup> _C57 | INS.SIN.LV.SF.GFP | LIVER | 19 | 34888368 | - | NM_001114339 | Pank1         | - |
| DMM139  | Cdkn2a <sup>-/-</sup> _C57 | INS.SIN.LV.SF.GFP | LIVER | 19 | 35838692 | - | NM_008315    | Htr7          | - |
| DMM134  | Cdkn2a <sup>-/-</sup> _C57 | INS.SIN.LV.SF.GFP | LIVER | 19 | 36946007 | + | NM_028263    | Fgfbp3        | - |
| DMM141  | Cdkn2a <sup>-/-</sup> _C57 | INS.SIN.LV.SF.GFP | LIVER | 19 | 38150617 | - | NM_028760    | Cep55         | + |
| DMM 142 | Cdkn2a <sup>-/-</sup> _C57 | INS.SIN.LV.SF.GFP | LIVER | 19 | 39045645 | + | NM_008234    | Hells         | + |
| DMM141  | Cdkn2a <sup>-/-</sup> _C57 | INS.SIN.LV.SF.GFP | LIVER | 19 | 40710072 | - | NM_026260    | Tctn3         | - |
| DMM 142 | Cdkn2a <sup>-/-</sup> _C57 | INS.SIN.LV.SF.GFP | LIVER | 19 | 41299685 | - | NM_133352    | Tm9sf3        | - |
| DMM141  | Cdkn2a <sup>-/-</sup> _C57 | INS.SIN.LV.SF.GFP | LIVER | 19 | 41630779 | - | NM_172154    | Lcor          | + |
| DMM128  | Cdkn2a <sup>-/-</sup> _C57 | INS.SIN.LV.SF.GFP | LIVER | 19 | 47003768 | + | NM_029810    | Nt5c2         | - |
| DMM128  | Cdkn2a <sup>-/-</sup> _C57 | INS.SIN.LV.SF.GFP | LIVER | 19 | 53998588 | - | NM_011050    | Pdcd4         | + |
| DMM 149 | Cdkn2a <sup>-/-</sup> _C57 | INS.SIN.LV.SF.GFP | LIVER | 19 | 54032513 | + | NM_019658    | Shoc2         | + |
| DMM 134 | Cdkn2a <sup>-/-</sup> _C57 | INS.SIN.LV.SF.GFP | LIVER | 19 | 60279154 | + | NM_029648    | D19Ertd737e   | - |
| DMM141  | Cdkn2a <sup>-/-</sup> _C57 | INS.SIN.LV.SF.GFP | LIVER | X  | 6794926  | + | NM_016691    | Clcn5         | - |
| DMM 142 | Cdkn2a <sup>-/-</sup> _C57 | INS.SIN.LV.SF.GFP | LIVER | X  | 6889959  | + | NM_019461    | Usp27x        | - |
| DMM141  | Cdkn2a <sup>-/-</sup> _C57 | INS.SIN.LV.SF.GFP | LIVER | X  | 7427255  | - | NM_138604    | Otud5         | + |
| DMM140  | Cdkn2a <sup>-/-</sup> _C57 | INS.SIN.LV.SF.GFP | LIVER | X  | 8461960  | + | NM_175327    | B630019K06Rik | + |
| DMM146  | Cdkn2a <sup>-/-</sup> _C57 | INS.SIN.LV.SF.GFP | LIVER | X  | 8731610  | + | NM_173414    | Lanc13        | + |
| DMM141  | Cdkn2a <sup>-/-</sup> _C57 | INS.SIN.LV.SF.GFP | LIVER | X  | 8760936  | + | NM_173414    | Lanc13        | + |
| DMM 142 | Cdkn2a <sup>-/-</sup> _C57 | INS.SIN.LV.SF.GFP | LIVER | X  | 8867305  | + | NM_023500    | Xk            | + |

|         |                            |                   |       |   |          |   |              |                    |   |
|---------|----------------------------|-------------------|-------|---|----------|---|--------------|--------------------|---|
| DMM134  | Cdkn2a <sup>-/-</sup> _C57 | INS.SIN.LV.SF.GFP | LIVER | X | 13373101 | - | NM_009806    | Cask               | - |
| DMM146  | Cdkn2a <sup>-/-</sup> _C57 | INS.SIN.LV.SF.GFP | LIVER | X | 14197925 | - | NM_001034100 | Gm5382             | + |
| DMM146  | Cdkn2a <sup>-/-</sup> _C57 | INS.SIN.LV.SF.GFP | LIVER | X | 17800780 | + | NM_009483    | Kdm6a              | + |
| DMM 134 | Cdkn2a <sup>-/-</sup> _C57 | INS.SIN.LV.SF.GFP | LIVER | X | 17840836 | - | NM_009483    | Kdm6a              | + |
| DMM141  | Cdkn2a <sup>-/-</sup> _C57 | INS.SIN.LV.SF.GFP | LIVER | X | 17849275 | + | NM_009483    | Kdm6a              | + |
| DMM140  | Cdkn2a <sup>-/-</sup> _C57 | INS.SIN.LV.SF.GFP | LIVER | X | 18739272 | - | NM_175228    | 4930578C19Rik      | - |
| DMM139  | Cdkn2a <sup>-/-</sup> _C57 | INS.SIN.LV.SF.GFP | LIVER | X | 19955220 | - | NM_133669    | Rp2h               | + |
| DMM139  | Cdkn2a <sup>-/-</sup> _C57 | INS.SIN.LV.SF.GFP | LIVER | X | 23258497 | + | NM_175180    | Wdr44              | + |
| DMM141  | Cdkn2a <sup>-/-</sup> _C57 | INS.SIN.LV.SF.GFP | LIVER | X | 23381149 | + | NM_175180    | Wdr44              | + |
| DMM141  | Cdkn2a <sup>-/-</sup> _C57 | INS.SIN.LV.SF.GFP | LIVER | X | 33447563 | + | NM_001009947 | Dock11             | + |
| DMM140  | Cdkn2a <sup>-/-</sup> _C57 | INS.SIN.LV.SF.GFP | LIVER | X | 34641700 | + | NM_026573    | Upf3b              | - |
| DMM141  | Cdkn2a <sup>-/-</sup> _C57 | INS.SIN.LV.SF.GFP | LIVER | X | 42795048 | + | NM_178739    | Wdr40b             | - |
| DMM141  | Cdkn2a <sup>-/-</sup> _C57 | INS.SIN.LV.SF.GFP | LIVER | X | 45130852 | + | NM_053123    | Smarca1            | - |
| DMM134  | Cdkn2a <sup>-/-</sup> _C57 | INS.SIN.LV.SF.GFP | LIVER | X | 46596199 | - | NM_145951    | Enox2              | - |
| DMM131  | Cdkn2a <sup>-/-</sup> _C57 | INS.SIN.LV.SF.GFP | LIVER | X | 47035213 | - | NM_207240    | Olfr1320           | + |
| DMM141  | Cdkn2a <sup>-/-</sup> _C57 | INS.SIN.LV.SF.GFP | LIVER | X | 50285005 | + | NM_027642    | Phf6               | + |
| DMM146  | Cdkn2a <sup>-/-</sup> _C57 | INS.SIN.LV.SF.GFP | LIVER | X | 50672041 | - | NM_028671    | Fam122c            | + |
| DMM140  | Cdkn2a <sup>-/-</sup> _C57 | INS.SIN.LV.SF.GFP | LIVER | X | 50701570 | - | NM_027409    | Mospd1             | - |
| DMM141  | Cdkn2a <sup>-/-</sup> _C57 | INS.SIN.LV.SF.GFP | LIVER | X | 51063751 | - | NM_001009549 | Zfp3613            | - |
| DMM139  | Cdkn2a <sup>-/-</sup> _C57 | INS.SIN.LV.SF.GFP | LIVER | X | 53838841 | + | NM_146234    | Mmgt1              | - |
| DMM141  | Cdkn2a <sup>-/-</sup> _C57 | INS.SIN.LV.SF.GFP | LIVER | X | 57255801 | + | NM_007979    | F9                 | + |
| DMM140  | Cdkn2a <sup>-/-</sup> _C57 | INS.SIN.LV.SF.GFP | LIVER | X | 65961308 | + | NM_008031    | Fmr1               | + |
| DMM 135 | Cdkn2a <sup>-/-</sup> _C57 | INS.SIN.LV.SF.GFP | LIVER | X | 68448921 | - | NM_019926    | Mtm1               | + |
| DMM 141 | Cdkn2a <sup>-/-</sup> _C57 | INS.SIN.LV.SF.GFP | LIVER | X | 68448925 | - | NM_019926    | Mtm1               | + |
| DMM140  | Cdkn2a <sup>-/-</sup> _C57 | INS.SIN.LV.SF.GFP | LIVER | X | 68485389 | + | NM_019926    | Mtm1               | + |
| DMM134  | Cdkn2a <sup>-/-</sup> _C57 | INS.SIN.LV.SF.GFP | LIVER | X | 68706096 | + | NM_138309    | Cd9912             | - |
| DMM134  | Cdkn2a <sup>-/-</sup> _C57 | INS.SIN.LV.SF.GFP | LIVER | X | 72676275 | - | NM_145956    | Brcc3              | + |
| DMM 130 | Cdkn2a <sup>-/-</sup> _C57 | INS.SIN.LV.SF.GFP | LIVER | X | 72901344 | + | NM_175122    | Rab39b             | - |
| DMM 142 | Cdkn2a <sup>-/-</sup> _C57 | INS.SIN.LV.SF.GFP | LIVER | X | 73087664 | + | NM_145629    | Pls3               | - |
| DMM141  | Cdkn2a <sup>-/-</sup> _C57 | INS.SIN.LV.SF.GFP | LIVER | X | 74801204 | - | NM_020601    | Tbl1x              | + |
| DMM 141 | Cdkn2a <sup>-/-</sup> _C57 | INS.SIN.LV.SF.GFP | LIVER | X | 75714575 | + | NM_001126321 | OTTMUSG00000017864 | - |
| DMM140  | Cdkn2a <sup>-/-</sup> _C57 | INS.SIN.LV.SF.GFP | LIVER | X | 84197174 | + | NM_001160403 | Il1rap11           | - |
| DMM134  | Cdkn2a <sup>-/-</sup> _C57 | INS.SIN.LV.SF.GFP | LIVER | X | 90102132 | - | NM_173783    | Mageb18            | - |
| DMM141  | Cdkn2a <sup>-/-</sup> _C57 | INS.SIN.LV.SF.GFP | LIVER | X | 90795498 | - | NM_008892    | Pola1              | - |
| DMM134  | Cdkn2a <sup>-/-</sup> _C57 | INS.SIN.LV.SF.GFP | LIVER | X | 91505306 | + | NM_001039061 | Klh15              | + |



|         |                            |                   |       |   |           |   |              |               |   |
|---------|----------------------------|-------------------|-------|---|-----------|---|--------------|---------------|---|
| DMM140  | Cdkn2a <sup>-/-</sup> _C57 | INS.SIN.LV.SF.GFP | LIVER | X | 95850753  | - | NM_052976    | Ophn1         | - |
| DMM 141 | Cdkn2a <sup>-/-</sup> _C57 | INS.SIN.LV.SF.GFP | LIVER | X | 97710731  | + | NM_008784    | Igfbp1        | + |
| DMM134  | Cdkn2a <sup>-/-</sup> _C57 | INS.SIN.LV.SF.GFP | LIVER | X | 98360954  | + | NM_001110311 | Snx12         | - |
| DMM141  | Cdkn2a <sup>-/-</sup> _C57 | INS.SIN.LV.SF.GFP | LIVER | X | 98413980  | + | NM_001110310 | Snx12         | - |
| DMM 134 | Cdkn2a <sup>-/-</sup> _C57 | INS.SIN.LV.SF.GFP | LIVER | X | 99231729  | + | NM_183318    | Rgag4         | - |
| DMM134  | Cdkn2a <sup>-/-</sup> _C57 | INS.SIN.LV.SF.GFP | LIVER | X | 99587631  | + | NM_027382    | Hdac8         | - |
| DMM140  | Cdkn2a <sup>-/-</sup> _C57 | INS.SIN.LV.SF.GFP | LIVER | X | 99748536  | - | NM_008832    | Phka1         | - |
| DMM128  | Cdkn2a <sup>-/-</sup> _C57 | INS.SIN.LV.SF.GFP | LIVER | X | 100778735 | + | NM_029158    | Zcchc13       | + |
| DMM 134 | Cdkn2a <sup>-/-</sup> _C57 | INS.SIN.LV.SF.GFP | LIVER | X | 101633853 | - | NM_009592    | Abcb7         | - |
| DMM 140 | Cdkn2a <sup>-/-</sup> _C57 | INS.SIN.LV.SF.GFP | LIVER | X | 103017047 | + | NM_009530    | Atrx          | - |
| DMM146  | Cdkn2a <sup>-/-</sup> _C57 | INS.SIN.LV.SF.GFP | LIVER | X | 104347370 | - | NM_175442    | A630033H20Rik | + |
| DMM128  | Cdkn2a <sup>-/-</sup> _C57 | INS.SIN.LV.SF.GFP | LIVER | X | 105957581 | - | NM_001081477 | Brwd3         | - |
| DMM128  | Cdkn2a <sup>-/-</sup> _C57 | INS.SIN.LV.SF.GFP | LIVER | X | 108279663 | + | NM_026134    | Cycl1         | + |
| DMM146  | Cdkn2a <sup>-/-</sup> _C57 | INS.SIN.LV.SF.GFP | LIVER | X | 109125063 | - | NM_031382    | Tex16         | + |
| DMM140  | Cdkn2a <sup>-/-</sup> _C57 | INS.SIN.LV.SF.GFP | LIVER | X | 110161886 | + | NM_018818    | Chm           | - |
| DMM 134 | Cdkn2a <sup>-/-</sup> _C57 | INS.SIN.LV.SF.GFP | LIVER | X | 110198302 | - | NM_018818    | Chm           | - |
| DMM 142 | Cdkn2a <sup>-/-</sup> _C57 | INS.SIN.LV.SF.GFP | LIVER | X | 110198352 | - | NM_018818    | Chm           | - |
| DMM146  | Cdkn2a <sup>-/-</sup> _C57 | INS.SIN.LV.SF.GFP | LIVER | X | 111224359 | - | NM_033605    | Dach2         | + |
| DMM140  | Cdkn2a <sup>-/-</sup> _C57 | INS.SIN.LV.SF.GFP | LIVER | X | 117538846 | - | NM_001081385 | Pcdh11x       | + |
| DMM140  | Cdkn2a <sup>-/-</sup> _C57 | INS.SIN.LV.SF.GFP | LIVER | X | 126575880 | - | NM_017398    | Diap2         | + |
| DMM134  | Cdkn2a <sup>-/-</sup> _C57 | INS.SIN.LV.SF.GFP | LIVER | X | 126666910 | - | NM_017398    | Diap2         | + |
| DMM140  | Cdkn2a <sup>-/-</sup> _C57 | INS.SIN.LV.SF.GFP | LIVER | X | 126707728 | - | NM_017398    | Diap2         | + |
| DMM146  | Cdkn2a <sup>-/-</sup> _C57 | INS.SIN.LV.SF.GFP | LIVER | X | 132425890 | + | NM_001098222 | Bhlhb9        | + |
| DMM128  | Cdkn2a <sup>-/-</sup> _C57 | INS.SIN.LV.SF.GFP | LIVER | X | 136188859 | - | NM_023270    | Rnf128        | + |
| DMM 128 | Cdkn2a <sup>-/-</sup> _C57 | INS.SIN.LV.SF.GFP | LIVER | X | 136391051 | - | NM_029413    | Morc4         | - |
| DMM 142 | Cdkn2a <sup>-/-</sup> _C57 | INS.SIN.LV.SF.GFP | LIVER | X | 139154392 | - | NM_177592    | Tmem164       | + |
| DMM141  | Cdkn2a <sup>-/-</sup> _C57 | INS.SIN.LV.SF.GFP | LIVER | X | 139779842 | + | NM_031258    | Chrd11        | - |
| DMM 142 | Cdkn2a <sup>-/-</sup> _C57 | INS.SIN.LV.SF.GFP | LIVER | X | 141614709 | + | NM_001033795 | Zcchc16       | + |
| DMM141  | Cdkn2a <sup>-/-</sup> _C57 | INS.SIN.LV.SF.GFP | LIVER | X | 147256377 | + | NR_003597    | Itih51        | + |
| DMM141  | Cdkn2a <sup>-/-</sup> _C57 | INS.SIN.LV.SF.GFP | LIVER | X | 147864825 | - | NM_198105    | Fam120c       | + |
| DMM146  | Cdkn2a <sup>-/-</sup> _C57 | INS.SIN.LV.SF.GFP | LIVER | X | 147944551 | - | NM_001113354 | Phf8          | + |
| DMM140  | Cdkn2a <sup>-/-</sup> _C57 | INS.SIN.LV.SF.GFP | LIVER | X | 151636959 | - | NM_009121    | Sat1          | - |
| DMM134  | Cdkn2a <sup>-/-</sup> _C57 | INS.SIN.LV.SF.GFP | LIVER | X | 154242766 | - | NM_001081667 | Klh134        | + |
| DMM 141 | Cdkn2a <sup>-/-</sup> _C57 | INS.SIN.LV.SF.GFP | LIVER | X | 156029890 | - | NM_001033472 | A830080D01Rik | + |
| DMM133  | Cdkn2a <sup>-/-</sup> _C57 | INS.SIN.LV.SF.GFP | LIVER | X | 157301414 | - | NM_001024624 | Cdk15         | - |

|         |                            |                   |       |   |           |   |              |               |   |
|---------|----------------------------|-------------------|-------|---|-----------|---|--------------|---------------|---|
| DMM141  | Cdkn2a <sup>-/-</sup> _C57 | INS.SIN.LV.SF.GFP | LIVER | X | 159221155 | + | NM_178935    | 4932441K18Rik | - |
| DMM128  | Cdkn2a <sup>-/-</sup> _C57 | INS.SIN.LV.SF.GFP | LIVER | X | 159297563 | - | NM_025932    | Syap1         | - |
| DMM134  | Cdkn2a <sup>-/-</sup> _C57 | INS.SIN.LV.SF.GFP | LIVER | X | 161028791 | + | NM_027027    | Asb9          | + |
| DMM146  | Cdkn2a <sup>-/-</sup> _C57 | INS.SIN.LV.SF.GFP | LIVER | X | 162702976 | - | NM_023122    | Gpm6b         | + |
| DMM140  | Cdkn2a <sup>-/-</sup> _C57 | INS.SIN.LV.SF.GFP | LIVER | X | 162825797 | - | NM_023122    | Gpm6b         | + |
| DMM139  | Cdkn2a <sup>-/-</sup> _C57 | INS.SIN.LV.SF.GFP | LIVER | X | 163168703 | + | NM_019397    | Egfl6         | - |
| DMM 149 | Cdkn2a <sup>-/-</sup> _C57 | INS.SIN.LV.SF.GFP | LIVER | X | 165498354 | + | NM_178754    | Arhgap6       | + |
| DMM128  | Cdkn2a <sup>-/-</sup> _C57 | INS.SIN.LV.SF.GFP | LIVER | X | 165552279 | + | NM_178754    | Arhgap6       | + |
| DMM141  | Cdkn2a <sup>-/-</sup> _C57 | INS.SIN.LV.SF.GFP | LIVER | X | 165768656 | + | NM_008222    | Hccs          | - |
| DMM 128 | Cdkn2a <sup>-/-</sup> _C57 | INS.SIN.LV.SF.GFP | LIVER | X | 166412666 | - | NM_010797    | Mid1          | + |
| DMM140  | Cdkn2a <sup>-/-</sup> _C57 | INS.SIN.LV.SF.GFP | LIVER | Y | 2889049   | - | NM_011253    | Rbmy1a1       | + |
| DMM101  | Cdkn2a <sup>-/-</sup> _C57 | SIN.LV.PGK.GFP    | LIVER | 1 | 6231098   | + | NM_009826    | Rb1cc1        | + |
| DMM 101 | Cdkn2a <sup>-/-</sup> _C57 | SIN.LV.PGK.GFP    | LIVER | 1 | 9876591   | - | NM_001037759 | Sgk3          | + |
| DMM101  | Cdkn2a <sup>-/-</sup> _C57 | SIN.LV.PGK.GFP    | LIVER | 1 | 10141966  | - | NM_001102430 | Arfgef1       | - |
| DMM 101 | Cdkn2a <sup>-/-</sup> _C57 | SIN.LV.PGK.GFP    | LIVER | 1 | 10183222  | + | NM_001102430 | Arfgef1       | - |
| DMM182  | Cdkn2a <sup>-/-</sup> _C57 | SIN.LV.PGK.GFP    | LIVER | 1 | 10627552  | - | NM_177834    | Cpa6          | - |
| DMM182  | Cdkn2a <sup>-/-</sup> _C57 | SIN.LV.PGK.GFP    | LIVER | 1 | 11187322  | + | NM_029525    | Prex2         | + |
| DMM183  | Cdkn2a <sup>-/-</sup> _C57 | SIN.LV.PGK.GFP    | LIVER | 1 | 15838132  | + | NM_009352    | Terf1         | + |
| DMM112L | Cdkn2a <sup>-/-</sup> _C57 | SIN.LV.PGK.GFP    | LIVER | 1 | 16100281  | + | NM_133832    | Rdh10         | + |
| DMM184  | Cdkn2a <sup>-/-</sup> _C57 | SIN.LV.PGK.GFP    | LIVER | 1 | 16574828  | - | NM_025773    | Ube2w         | - |
| DMM 105 | Cdkn2a <sup>-/-</sup> _C57 | SIN.LV.PGK.GFP    | LIVER | 1 | 16591425  | - | NM_025773    | Ube2w         | - |
| DMM106  | Cdkn2a <sup>-/-</sup> _C57 | SIN.LV.PGK.GFP    | LIVER | 1 | 20876096  | + | NM_028829    | Paqr8         | + |
| DMM101  | Cdkn2a <sup>-/-</sup> _C57 | SIN.LV.PGK.GFP    | LIVER | 1 | 21847310  | - | NM_001160139 | Kenq5         | - |
| DMM182  | Cdkn2a <sup>-/-</sup> _C57 | SIN.LV.PGK.GFP    | LIVER | 1 | 21877541  | - | NM_001160139 | Kenq5         | - |
| DMM101  | Cdkn2a <sup>-/-</sup> _C57 | SIN.LV.PGK.GFP    | LIVER | 1 | 25834098  | - | NM_175642    | Bai3          | - |
| DMM101  | Cdkn2a <sup>-/-</sup> _C57 | SIN.LV.PGK.GFP    | LIVER | 1 | 27303053  | - | NM_001033764 | 4931408C20Rik | - |
| DMM181  | Cdkn2a <sup>-/-</sup> _C57 | SIN.LV.PGK.GFP    | LIVER | 1 | 28199865  | + | NM_001013750 | Gm597         | - |
| DMM182  | Cdkn2a <sup>-/-</sup> _C57 | SIN.LV.PGK.GFP    | LIVER | 1 | 30874164  | - | NM_001081080 | Phf3          | - |
| DMM172  | Cdkn2a <sup>-/-</sup> _C57 | SIN.LV.PGK.GFP    | LIVER | 1 | 33851913  | - | NM_133817    | Zfp451        | - |
| DMM184  | Cdkn2a <sup>-/-</sup> _C57 | SIN.LV.PGK.GFP    | LIVER | 1 | 38088051  | + | NM_198303    | Eif5b         | + |
| DMM101  | Cdkn2a <sup>-/-</sup> _C57 | SIN.LV.PGK.GFP    | LIVER | 1 | 43548143  | + | NM_010879    | Nck2          | + |
| DMM101  | Cdkn2a <sup>-/-</sup> _C57 | SIN.LV.PGK.GFP    | LIVER | 1 | 52239171  | - | NM_001081081 | Gls           | - |

|         |                            |                |       |   |           |   |              |               |   |
|---------|----------------------------|----------------|-------|---|-----------|---|--------------|---------------|---|
| DMM182  | Cdkn2a <sup>-/-</sup> _C57 | SIN.LV.PGK.GFP | LIVER | 1 | 52260457  | - | NM_001113383 | Gls           | - |
| DMM112L | Cdkn2a <sup>-/-</sup> _C57 | SIN.LV.PGK.GFP | LIVER | 1 | 53829561  | - | NM_133810    | Stk17b        | - |
| DMM112L | Cdkn2a <sup>-/-</sup> _C57 | SIN.LV.PGK.GFP | LIVER | 1 | 55956873  | + | NM_001114663 | Plcl1         | + |
| DMM106  | Cdkn2a <sup>-/-</sup> _C57 | SIN.LV.PGK.GFP | LIVER | 1 | 60609619  | - | NM_001045513 | Raph1         | - |
| DMM112L | Cdkn2a <sup>-/-</sup> _C57 | SIN.LV.PGK.GFP | LIVER | 1 | 78437692  | - | NM_011811    | Farsb         | - |
| DMM182  | Cdkn2a <sup>-/-</sup> _C57 | SIN.LV.PGK.GFP | LIVER | 1 | 80313973  | - | NM_016716    | Cul3          | - |
| DMM 112 | Cdkn2a <sup>-/-</sup> _C57 | SIN.LV.PGK.GFP | LIVER | 1 | 80639034  | - | NM_175291    | Dock10        | - |
| DMM182  | Cdkn2a <sup>-/-</sup> _C57 | SIN.LV.PGK.GFP | LIVER | 1 | 84249507  | - | NM_001003948 | 5033414K04Rik | - |
| DMM 88  | Cdkn2a <sup>-/-</sup> _C57 | SIN.LV.PGK.GFP | LIVER | 1 | 92503727  |   | NM_133805    | Cops8         | + |
| DMM182  | Cdkn2a <sup>-/-</sup> _C57 | SIN.LV.PGK.GFP | LIVER | 1 | 97219745  | + | NM_026321    | Fam174a       | + |
| DMM 101 | Cdkn2a <sup>-/-</sup> _C57 | SIN.LV.PGK.GFP | LIVER | 1 | 99654537  | + | NM_173760    | Hisppd1       | - |
| DMM 88  | Cdkn2a <sup>-/-</sup> _C57 | SIN.LV.PGK.GFP | LIVER | 1 | 99683305  | - | NM_026250    | Zh2c2         | + |
| DMM 101 | Cdkn2a <sup>-/-</sup> _C57 | SIN.LV.PGK.GFP | LIVER | 1 | 107064780 | - | NM_001160368 | Rnf152        | - |
| DMM112L | Cdkn2a <sup>-/-</sup> _C57 | SIN.LV.PGK.GFP | LIVER | 1 | 107071971 | - | NM_001160368 | Rnf152        | - |
| DMM184  | Cdkn2a <sup>-/-</sup> _C57 | SIN.LV.PGK.GFP | LIVER | 1 | 113070331 | - | NM_001081386 | Cdh19         | - |
| DMM181  | Cdkn2a <sup>-/-</sup> _C57 | SIN.LV.PGK.GFP | LIVER | 1 | 128407838 | - | NM_001081756 | E030049G20Rik | - |
| DMM104  | Cdkn2a <sup>-/-</sup> _C57 | SIN.LV.PGK.GFP | LIVER | 1 | 130056348 | + | NM_181750    | R3hdm1        | + |
| DMM101  | Cdkn2a <sup>-/-</sup> _C57 | SIN.LV.PGK.GFP | LIVER | 1 | 133239562 | - | NM_001081011 | Srgap2        | - |
| DMM182  | Cdkn2a <sup>-/-</sup> _C57 | SIN.LV.PGK.GFP | LIVER | 1 | 133390886 | - | NM_001081011 | Srgap2        | - |
| DMM112L | Cdkn2a <sup>-/-</sup> _C57 | SIN.LV.PGK.GFP | LIVER | 1 | 140996032 | + | NM_181347    | Dennd1b       | + |
| DMM 112 | Cdkn2a <sup>-/-</sup> _C57 | SIN.LV.PGK.GFP | LIVER | 1 | 142230233 | + | NM_001081027 | Kcnt2         | + |
| DMM 88  | Cdkn2a <sup>-/-</sup> _C57 | SIN.LV.PGK.GFP | LIVER | 1 | 145463641 | - | NM_145991    | Cdc73         | - |
| DMM106  | Cdkn2a <sup>-/-</sup> _C57 | SIN.LV.PGK.GFP | LIVER | 1 | 145535005 | - | NM_145991    | Cdc73         | - |
| DMM105  | Cdkn2a <sup>-/-</sup> _C57 | SIN.LV.PGK.GFP | LIVER | 1 | 146121403 | - | NM_015811    | Rgs1          | - |
| DMM103  | Cdkn2a <sup>-/-</sup> _C57 | SIN.LV.PGK.GFP | LIVER | 1 | 150627273 | - | NM_008869    | Pla2g4a       | - |
| DMM 112 | Cdkn2a <sup>-/-</sup> _C57 | SIN.LV.PGK.GFP | LIVER | 1 | 150778397 | - | NM_008869    | Pla2g4a       | - |
| DMM181  | Cdkn2a <sup>-/-</sup> _C57 | SIN.LV.PGK.GFP | LIVER | 1 | 151810085 | - | NM_008869    | Pla2g4a       | - |
| DMM112L | Cdkn2a <sup>-/-</sup> _C57 | SIN.LV.PGK.GFP | LIVER | 1 | 153122436 | + | NM_001039511 | Ivns1abp      | + |
| DMM181  | Cdkn2a <sup>-/-</sup> _C57 | SIN.LV.PGK.GFP | LIVER | 1 | 159316066 | - | NM_177644    | Rasal2        | - |
| DMM181  | Cdkn2a <sup>-/-</sup> _C57 | SIN.LV.PGK.GFP | LIVER | 1 | 161035882 | + | NM_011931    | Rfwd2         | + |
| DMM101  | Cdkn2a <sup>-/-</sup> _C57 | SIN.LV.PGK.GFP | LIVER | 1 | 161239443 | + | NM_011931    | Rfwd2         | + |

|         |                            |                |       |   |           |   |              |          |   |
|---------|----------------------------|----------------|-------|---|-----------|---|--------------|----------|---|
| DMM182  | Cdkn2a <sup>-/-</sup> _C57 | SIN.LV.PGK.GFP | LIVER | 1 | 161502069 | + | NM_022312    | Tnr      | + |
| DMM101  | Cdkn2a <sup>-/-</sup> _C57 | SIN.LV.PGK.GFP | LIVER | 1 | 161955436 | + | NM_177839    | Tnn      | - |
| DMM103  | Cdkn2a <sup>-/-</sup> _C57 | SIN.LV.PGK.GFP | LIVER | 1 | 162133944 | - | NM_009786    | Cacybp   | - |
| DMM 101 | Cdkn2a <sup>-/-</sup> _C57 | SIN.LV.PGK.GFP | LIVER | 1 | 162536139 | + | NM_013862    | Rabgap11 | + |
| DMM104  | Cdkn2a <sup>-/-</sup> _C57 | SIN.LV.PGK.GFP | LIVER | 1 | 163774145 | - | NM_010177    | Fasl     | - |
| DMM105  | Cdkn2a <sup>-/-</sup> _C57 | SIN.LV.PGK.GFP | LIVER | 1 | 164840400 | - | NM_018881    | Fmo2     | - |
| DMM112L | Cdkn2a <sup>-/-</sup> _C57 | SIN.LV.PGK.GFP | LIVER | 1 | 166549349 | - | NM_009721    | Atp1b1   | - |
| DMM 101 | Cdkn2a <sup>-/-</sup> _C57 | SIN.LV.PGK.GFP | LIVER | 1 | 167860712 | + | NM_198933    | Pou2f1   | + |
| DMM184  | Cdkn2a <sup>-/-</sup> _C57 | SIN.LV.PGK.GFP | LIVER | 1 | 170551783 | - | NM_008783    | Pbx1     | - |
| DMM181  | Cdkn2a <sup>-/-</sup> _C57 | SIN.LV.PGK.GFP | LIVER | 1 | 173631530 | + | NM_007649    | Cd48     | + |
| DMM184  | Cdkn2a <sup>-/-</sup> _C57 | SIN.LV.PGK.GFP | LIVER | 1 | 177025108 | - | NM_011880    | Rgs7     | - |
| DMM101  | Cdkn2a <sup>-/-</sup> _C57 | SIN.LV.PGK.GFP | LIVER | 1 | 180134983 | + | NM_024282    | Pppde1   | + |
| DMM182  | Cdkn2a <sup>-/-</sup> _C57 | SIN.LV.PGK.GFP | LIVER | 1 | 181925500 | + | NM_023341    | Cabc1    | - |
| DMM112L | Cdkn2a <sup>-/-</sup> _C57 | SIN.LV.PGK.GFP | LIVER | 1 | 185825276 | + | NM_022019    | Dusp10   | + |
| DMM 101 | Cdkn2a <sup>-/-</sup> _C57 | SIN.LV.PGK.GFP | LIVER | 1 | 195659971 | - | NM_144817    | Camk1g   | - |
| DMM182  | Cdkn2a <sup>-/-</sup> _C57 | SIN.LV.PGK.GFP | LIVER | 2 | 9896160   | - | NM_027748    | Taf3     | - |
| DMM103  | Cdkn2a <sup>-/-</sup> _C57 | SIN.LV.PGK.GFP | LIVER | 2 | 13018004  | - | NM_009105    | Rsu1     | - |
| DMM 88  | Cdkn2a <sup>-/-</sup> _C57 | SIN.LV.PGK.GFP | LIVER | 2 | 18224757  | - | NM_007869    | Dnajc1   | - |
| DMM184  | Cdkn2a <sup>-/-</sup> _C57 | SIN.LV.PGK.GFP | LIVER | 2 | 18225806  | - | NM_007869    | Dnajc1   | - |
| DMM 112 | Cdkn2a <sup>-/-</sup> _C57 | SIN.LV.PGK.GFP | LIVER | 2 | 18226473  | - | NM_007869    | Dnajc1   | - |
| DMM 101 | Cdkn2a <sup>-/-</sup> _C57 | SIN.LV.PGK.GFP | LIVER | 2 | 18871734  | + | NM_008845    | Pip4k2a  | - |
| DMM101  | Cdkn2a <sup>-/-</sup> _C57 | SIN.LV.PGK.GFP | LIVER | 2 | 20920222  | - | NM_001081364 | Arhgap21 | - |
| DMM184  | Cdkn2a <sup>-/-</sup> _C57 | SIN.LV.PGK.GFP | LIVER | 2 | 20940770  | - | NM_001081364 | Arhgap21 | - |
| DMM181  | Cdkn2a <sup>-/-</sup> _C57 | SIN.LV.PGK.GFP | LIVER | 2 | 24421579  | - | NM_007579    | Cacna1b  | - |
| DMM184  | Cdkn2a <sup>-/-</sup> _C57 | SIN.LV.PGK.GFP | LIVER | 2 | 29853599  | + | NM_001076554 | Spna2    | + |
| DMM111  | Cdkn2a <sup>-/-</sup> _C57 | SIN.LV.PGK.GFP | LIVER | 2 | 48625839  | + | NM_007396    | Acvr2a   | + |
| DMM181  | Cdkn2a <sup>-/-</sup> _C57 | SIN.LV.PGK.GFP | LIVER | 2 | 53591010  | - | NM_023396    | Rprm     | - |
| DMM184  | Cdkn2a <sup>-/-</sup> _C57 | SIN.LV.PGK.GFP | LIVER | 2 | 54296332  | + | NM_173030    | Galnt13  | + |
| DMM 101 | Cdkn2a <sup>-/-</sup> _C57 | SIN.LV.PGK.GFP | LIVER | 2 | 57716104  | + | NM_172855    | Galnt5   | + |
| DMM 88  | Cdkn2a <sup>-/-</sup> _C57 | SIN.LV.PGK.GFP | LIVER | 2 | 60063280  | + | NM_020575    | 7-Mar    | + |
| DMM 101 | Cdkn2a <sup>-/-</sup> _C57 | SIN.LV.PGK.GFP | LIVER | 2 | 60659677  | - | NM_001141931 | Rbms1    | - |

|         |                            |                |       |   |           |   |              |               |   |
|---------|----------------------------|----------------|-------|---|-----------|---|--------------|---------------|---|
| DMM112L | Cdkn2a <sup>-/-</sup> _C57 | SIN.LV.PGK.GFP | LIVER | 2 | 65977527  | - | NM_015736    | Galnt3        | - |
| DMM 101 | Cdkn2a <sup>-/-</sup> _C57 | SIN.LV.PGK.GFP | LIVER | 2 | 69822727  |   | NM_001081548 | Ubr3          | + |
| DMM 101 | Cdkn2a <sup>-/-</sup> _C57 | SIN.LV.PGK.GFP | LIVER | 2 | 75733905  | - | NM_172666    | Agps          | + |
| DMM101  | Cdkn2a <sup>-/-</sup> _C57 | SIN.LV.PGK.GFP | LIVER | 2 | 76529984  | + | NM_031256    | Plekha3       | + |
| DMM112L | Cdkn2a <sup>-/-</sup> _C57 | SIN.LV.PGK.GFP | LIVER | 2 | 78732187  | + | NM_009454    | Ube2e3        | + |
| DMM181  | Cdkn2a <sup>-/-</sup> _C57 | SIN.LV.PGK.GFP | LIVER | 2 | 79828247  | - | NM_016744    | Pde1a         | - |
| DMM181  | Cdkn2a <sup>-/-</sup> _C57 | SIN.LV.PGK.GFP | LIVER | 2 | 92118502  | + | NM_001109690 | Phf21a        | + |
| DMM 101 | Cdkn2a <sup>-/-</sup> _C57 | SIN.LV.PGK.GFP | LIVER | 2 | 96647440  | - | NM_178725    | Lrrc4c        | + |
| DMM 101 | Cdkn2a <sup>-/-</sup> _C57 | SIN.LV.PGK.GFP | LIVER | 2 | 101059786 | - | NM_026592    | B230118H07Rik | - |
| DMM101  | Cdkn2a <sup>-/-</sup> _C57 | SIN.LV.PGK.GFP | LIVER | 2 | 101464402 | - | NM_026592    | B230118H07Rik | - |
| DMM111  | Cdkn2a <sup>-/-</sup> _C57 | SIN.LV.PGK.GFP | LIVER | 2 | 102194513 | - | NM_020267    | Trim44        | - |
| DMM182  | Cdkn2a <sup>-/-</sup> _C57 | SIN.LV.PGK.GFP | LIVER | 2 | 102792451 | - | NM_001039150 | Cd44          | - |
| DMM 101 | Cdkn2a <sup>-/-</sup> _C57 | SIN.LV.PGK.GFP | LIVER | 2 | 104603138 | + | NM_001123327 | Qser1         | - |
| DMM101  | Cdkn2a <sup>-/-</sup> _C57 | SIN.LV.PGK.GFP | LIVER | 2 | 109771077 | + | NM_172671    | Lgr4          | + |
| DMM112L | Cdkn2a <sup>-/-</sup> _C57 | SIN.LV.PGK.GFP | LIVER | 2 | 114436943 | - | NM_025675    | Atpbd4        | - |
| DMM182  | Cdkn2a <sup>-/-</sup> _C57 | SIN.LV.PGK.GFP | LIVER | 2 | 114509349 | - | NM_025675    | Atpbd4        | - |
| DMM 101 | Cdkn2a <sup>-/-</sup> _C57 | SIN.LV.PGK.GFP | LIVER | 2 | 115447623 | - | NM_001145898 | BC052040      | + |
| DMM 101 | Cdkn2a <sup>-/-</sup> _C57 | SIN.LV.PGK.GFP | LIVER | 2 | 121361125 | + | NM_030234    | Wdr76         | + |
| DMM181  | Cdkn2a <sup>-/-</sup> _C57 | SIN.LV.PGK.GFP | LIVER | 2 | 126558875 | - | NM_019729    | Usp8          | + |
| DMM183  | Cdkn2a <sup>-/-</sup> _C57 | SIN.LV.PGK.GFP | LIVER | 2 | 130315024 | + | NM_008980    | Ptptra        | + |
| DMM 112 | Cdkn2a <sup>-/-</sup> _C57 | SIN.LV.PGK.GFP | LIVER | 2 | 130750309 |   | NM_009730    | Atrn          | + |
| DMM 101 | Cdkn2a <sup>-/-</sup> _C57 | SIN.LV.PGK.GFP | LIVER | 2 | 132387214 | - | NM_001042671 | Prei4         | - |
| DMM182  | Cdkn2a <sup>-/-</sup> _C57 | SIN.LV.PGK.GFP | LIVER | 2 | 137409581 | - | NM_013822    | Jag1          | - |
| DMM 101 | Cdkn2a <sup>-/-</sup> _C57 | SIN.LV.PGK.GFP | LIVER | 2 | 137450289 | - | NM_013822    | Jag1          | - |
| DMM182  | Cdkn2a <sup>-/-</sup> _C57 | SIN.LV.PGK.GFP | LIVER | 2 | 138070505 | + | NM_001025431 | Btbd3         | + |
| DMM109  | Cdkn2a <sup>-/-</sup> _C57 | SIN.LV.PGK.GFP | LIVER | 2 | 138106653 | + | NM_145534    | Btbd3         | + |
| DMM101  | Cdkn2a <sup>-/-</sup> _C57 | SIN.LV.PGK.GFP | LIVER | 2 | 139868263 | - | NM_175225    | Tasp1         | - |
| DMM103  | Cdkn2a <sup>-/-</sup> _C57 | SIN.LV.PGK.GFP | LIVER | 2 | 142545827 | - | NM_001081133 | Kif16b        | - |
| DMM106  | Cdkn2a <sup>-/-</sup> _C57 | SIN.LV.PGK.GFP | LIVER | 2 | 144468707 | + | NM_025314    | Dtd1          | + |
| DMM183  | Cdkn2a <sup>-/-</sup> _C57 | SIN.LV.PGK.GFP | LIVER | 2 | 145197074 | + | NM_053195    | Slc24a3       | + |
| DMM106  | Cdkn2a <sup>-/-</sup> _C57 | SIN.LV.PGK.GFP | LIVER | 2 | 148525567 | - | NM_019632    | Napb          | - |

|         |                            |                |       |   |           |   |              |               |   |
|---------|----------------------------|----------------|-------|---|-----------|---|--------------|---------------|---|
| DMM181  | Cdkn2a <sup>-/-</sup> _C57 | SIN.LV.PGK.GFP | LIVER | 2 | 149485975 | - | NM_001085521 | Gm14134       | + |
| DMM 101 | Cdkn2a <sup>-/-</sup> _C57 | SIN.LV.PGK.GFP | LIVER | 2 | 158289787 | - | NM_177658    | B230339M05Rik | - |
| DMM184  | Cdkn2a <sup>-/-</sup> _C57 | SIN.LV.PGK.GFP | LIVER | 2 | 163939897 | + | NM_021420    | Stk4          | + |
| DMM 88  | Cdkn2a <sup>-/-</sup> _C57 | SIN.LV.PGK.GFP | LIVER | 2 | 169760061 | + | NM_080455    | Tshz2         | + |
| DMM 88  | Cdkn2a <sup>-/-</sup> _C57 | SIN.LV.PGK.GFP | LIVER | 2 | 174161947 | - | NM_019690    | Gnas          | + |
| DMM181  | Cdkn2a <sup>-/-</sup> _C57 | SIN.LV.PGK.GFP | LIVER | 2 | 181346683 | + | NM_133701    | Prpf6         | + |
| DMM112L | Cdkn2a <sup>-/-</sup> _C57 | SIN.LV.PGK.GFP | LIVER | 2 | 181665429 | + | NM_025901    | Polr3k        | + |
| DMM 101 | Cdkn2a <sup>-/-</sup> _C57 | SIN.LV.PGK.GFP | LIVER | 3 | 5560748   | + | NM_008994    | Pxmp3         | - |
| DMM101  | Cdkn2a <sup>-/-</sup> _C57 | SIN.LV.PGK.GFP | LIVER | 3 | 5571233   | - | NM_008994    | Pxmp3         | - |
| DMM184  | Cdkn2a <sup>-/-</sup> _C57 | SIN.LV.PGK.GFP | LIVER | 3 | 6897433   | - | NM_008862    | Pkia          | + |
| DMM101  | Cdkn2a <sup>-/-</sup> _C57 | SIN.LV.PGK.GFP | LIVER | 3 | 9267594   | + | NM_133218    | Zfp704        | - |
| DMM181  | Cdkn2a <sup>-/-</sup> _C57 | SIN.LV.PGK.GFP | LIVER | 3 | 9437717   | - | NM_133218    | Zfp704        | - |
| DMM 101 | Cdkn2a <sup>-/-</sup> _C57 | SIN.LV.PGK.GFP | LIVER | 3 | 10318168  | - | NM_018864    | Impa1         | - |
| DMM 88  | Cdkn2a <sup>-/-</sup> _C57 | SIN.LV.PGK.GFP | LIVER | 3 | 14539284  | + | NM_028915    | Lrrcc1        | + |
| DMM 101 | Cdkn2a <sup>-/-</sup> _C57 | SIN.LV.PGK.GFP | LIVER | 3 | 14657068  | - | NM_024495    | Car13         | + |
| DMM 112 | Cdkn2a <sup>-/-</sup> _C57 | SIN.LV.PGK.GFP | LIVER | 3 | 19032238  | + | NM_028840    | Armc1         | - |
| DMM106  | Cdkn2a <sup>-/-</sup> _C57 | SIN.LV.PGK.GFP | LIVER | 3 | 20212067  | - | NM_175086    | Agtr1b        | - |
| DMM112L | Cdkn2a <sup>-/-</sup> _C57 | SIN.LV.PGK.GFP | LIVER | 3 | 21842960  | + | NM_030732    | Tbl1xr1       | + |
| DMM184  | Cdkn2a <sup>-/-</sup> _C57 | SIN.LV.PGK.GFP | LIVER | 3 | 25450614  | - | NM_138666    | Nlgn1         | - |
| DMM111  | Cdkn2a <sup>-/-</sup> _C57 | SIN.LV.PGK.GFP | LIVER | 3 | 27004566  | - | NM_007900    | Ect2          | - |
| DMM181  | Cdkn2a <sup>-/-</sup> _C57 | SIN.LV.PGK.GFP | LIVER | 3 | 30831906  | - | NM_153421    | Phc3          | - |
| DMM112L | Cdkn2a <sup>-/-</sup> _C57 | SIN.LV.PGK.GFP | LIVER | 3 | 30838992  | - | NM_153421    | Phc3          | - |
| DMM 112 | Cdkn2a <sup>-/-</sup> _C57 | SIN.LV.PGK.GFP | LIVER | 3 | 31271746  | - | NM_172861    | Slc7a14       | - |
| DMM 101 | Cdkn2a <sup>-/-</sup> _C57 | SIN.LV.PGK.GFP | LIVER | 3 | 33926629  | - | NM_001113188 | Fxr1          | + |
| DMM101  | Cdkn2a <sup>-/-</sup> _C57 | SIN.LV.PGK.GFP | LIVER | 3 | 40564660  | + | NM_011020    | Hspa4l        | + |
| DMM105  | Cdkn2a <sup>-/-</sup> _C57 | SIN.LV.PGK.GFP | LIVER | 3 | 41551078  | + | NM_001099785 | D3Erttd751e   | + |
| DMM184  | Cdkn2a <sup>-/-</sup> _C57 | SIN.LV.PGK.GFP | LIVER | 3 | 43006652  | + | NM_001099785 | D3Erttd751e   | + |
| DMM 112 | Cdkn2a <sup>-/-</sup> _C57 | SIN.LV.PGK.GFP | LIVER | 3 | 47466924  | - | NR_003617    | 1700018B24Rik | - |
| DMM 105 | Cdkn2a <sup>-/-</sup> _C57 | SIN.LV.PGK.GFP | LIVER | 3 | 47875340  | - | NR_003617    | 1700018B24Rik | - |
| DMM101  | Cdkn2a <sup>-/-</sup> _C57 | SIN.LV.PGK.GFP | LIVER | 3 | 47888626  | - | NR_003617    | 1700018B24Rik | - |
| DMM184  | Cdkn2a <sup>-/-</sup> _C57 | SIN.LV.PGK.GFP | LIVER | 3 | 50743481  | - | NM_009834    | Ccrn4l        | + |

|         |                            |                |       |   |           |   |              |               |   |
|---------|----------------------------|----------------|-------|---|-----------|---|--------------|---------------|---|
| DMM112L | Cdkn2a <sup>-/-</sup> _C57 | SIN.LV.PGK.GFP | LIVER | 3 | 51246725  | + | NM_053089    | Narg1         | + |
| DMM101  | Cdkn2a <sup>-/-</sup> _C57 | SIN.LV.PGK.GFP | LIVER | 3 | 54182966  | + | NM_015784    | Postn         | + |
| DMM101  | Cdkn2a <sup>-/-</sup> _C57 | SIN.LV.PGK.GFP | LIVER | 3 | 55881262  | - | NM_030595    | Nbea          | - |
| DMM101  | Cdkn2a <sup>-/-</sup> _C57 | SIN.LV.PGK.GFP | LIVER | 3 | 58236368  | + | NM_001081229 | Tsc22d2       | + |
| DMM112L | Cdkn2a <sup>-/-</sup> _C57 | SIN.LV.PGK.GFP | LIVER | 3 | 58991980  | - | NM_032399    | Gpr87         | - |
| DMM112L | Cdkn2a <sup>-/-</sup> _C57 | SIN.LV.PGK.GFP | LIVER | 3 | 59025802  | - | NM_027571    | P2ry12        | - |
| DMM 112 | Cdkn2a <sup>-/-</sup> _C57 | SIN.LV.PGK.GFP | LIVER | 3 | 60427350  | + | NM_020007    | Mbnl1         | + |
| DMM181  | Cdkn2a <sup>-/-</sup> _C57 | SIN.LV.PGK.GFP | LIVER | 3 | 61023974  | + | NM_028712    | Rap2b         | + |
| DMM 88  | Cdkn2a <sup>-/-</sup> _C57 | SIN.LV.PGK.GFP | LIVER | 3 | 61355759  | + | NM_028712    | Rap2b         | + |
| DMM 88  | Cdkn2a <sup>-/-</sup> _C57 | SIN.LV.PGK.GFP | LIVER | 3 | 61508872  | - | NM_028712    | Rap2b         | + |
| DMM103  | Cdkn2a <sup>-/-</sup> _C57 | SIN.LV.PGK.GFP | LIVER | 3 | 65346628  | + | NM_178892    | Tiparp        | + |
| DMM184  | Cdkn2a <sup>-/-</sup> _C57 | SIN.LV.PGK.GFP | LIVER | 3 | 66812413  | + | NM_025822    | Rsrc1         | + |
| DMM 88  | Cdkn2a <sup>-/-</sup> _C57 | SIN.LV.PGK.GFP | LIVER | 3 | 66874192  |   | NM_025822    | Rsrc1         | + |
| DMM112L | Cdkn2a <sup>-/-</sup> _C57 | SIN.LV.PGK.GFP | LIVER | 3 | 66916737  | + | NM_025822    | Rsrc1         | + |
| DMM 101 | Cdkn2a <sup>-/-</sup> _C57 | SIN.LV.PGK.GFP | LIVER | 3 | 67031532  | - | NM_025822    | Rsrc1         | + |
| DMM112L | Cdkn2a <sup>-/-</sup> _C57 | SIN.LV.PGK.GFP | LIVER | 3 | 69455189  | - | NM_020026    | B3galnt1      | - |
| DMM101  | Cdkn2a <sup>-/-</sup> _C57 | SIN.LV.PGK.GFP | LIVER | 3 | 70596420  | - | NM_001018031 | Gm414         | + |
| DMM184  | Cdkn2a <sup>-/-</sup> _C57 | SIN.LV.PGK.GFP | LIVER | 3 | 73129977  | + | NM_198864    | Slitrk3       | - |
| DMM 88  | Cdkn2a <sup>-/-</sup> _C57 | SIN.LV.PGK.GFP | LIVER | 3 | 78860073  | - | NM_001099624 | Rapgef2       | - |
| DMM183  | Cdkn2a <sup>-/-</sup> _C57 | SIN.LV.PGK.GFP | LIVER | 3 | 78941497  | - | NM_001099624 | Rapgef2       | - |
| DMM 101 | Cdkn2a <sup>-/-</sup> _C57 | SIN.LV.PGK.GFP | LIVER | 3 | 79406445  | + | NM_026352    | Ppid          | + |
| DMM184  | Cdkn2a <sup>-/-</sup> _C57 | SIN.LV.PGK.GFP | LIVER | 3 | 80992138  | + | NM_019971    | Pdgfc         | + |
| DMM 112 | Cdkn2a <sup>-/-</sup> _C57 | SIN.LV.PGK.GFP | LIVER | 3 | 83624255  | + | NM_011905    | Tlr2          | - |
| DMM 101 | Cdkn2a <sup>-/-</sup> _C57 | SIN.LV.PGK.GFP | LIVER | 3 | 83802977  | + | NM_172681    | D930015E06Rik | - |
| DMM182  | Cdkn2a <sup>-/-</sup> _C57 | SIN.LV.PGK.GFP | LIVER | 3 | 86173043  | + | NM_001077687 | Lrba          | + |
| DMM112L | Cdkn2a <sup>-/-</sup> _C57 | SIN.LV.PGK.GFP | LIVER | 3 | 94227125  | + | NM_028307    | Tdrkh         | + |
| DMM181  | Cdkn2a <sup>-/-</sup> _C57 | SIN.LV.PGK.GFP | LIVER | 3 | 95581523  | - | NM_001081293 | Rprd2         | - |
| DMM 101 | Cdkn2a <sup>-/-</sup> _C57 | SIN.LV.PGK.GFP | LIVER | 3 | 96369629  | - | NM_023719    | Txnip         | + |
| DMM 88  | Cdkn2a <sup>-/-</sup> _C57 | SIN.LV.PGK.GFP | LIVER | 3 | 97907638  | - | NM_010928    | Notch2        | + |
| DMM101  | Cdkn2a <sup>-/-</sup> _C57 | SIN.LV.PGK.GFP | LIVER | 3 | 105786060 | + | NM_007696    | Ovgp1         | + |
| DMM112L | Cdkn2a <sup>-/-</sup> _C57 | SIN.LV.PGK.GFP | LIVER | 3 | 107117070 | + | NM_146136    | Slc16a4       | + |

|         |                            |                |       |   |           |   |              |         |   |
|---------|----------------------------|----------------|-------|---|-----------|---|--------------|---------|---|
| DMM181  | Cdkn2a <sup>-/-</sup> _C57 | SIN.LV.PGK.GFP | LIVER | 3 | 108244220 | - | NM_011319    | Sars    | - |
| DMM182  | Cdkn2a <sup>-/-</sup> _C57 | SIN.LV.PGK.GFP | LIVER | 3 | 108430423 | + | NM_181400    | Wdr47   | + |
| DMM 101 | Cdkn2a <sup>-/-</sup> _C57 | SIN.LV.PGK.GFP | LIVER | 3 | 110051546 |   | NM_178891    | Prmt6   | - |
| DMM106  | Cdkn2a <sup>-/-</sup> _C57 | SIN.LV.PGK.GFP | LIVER | 3 | 110051656 | - | NM_178891    | Prmt6   | - |
| DMM112L | Cdkn2a <sup>-/-</sup> _C57 | SIN.LV.PGK.GFP | LIVER | 3 | 114842280 | + | NM_153157    | Olfm3   | + |
| DMM182  | Cdkn2a <sup>-/-</sup> _C57 | SIN.LV.PGK.GFP | LIVER | 3 | 115770730 | + | NM_021388    | Extl2   | + |
| DMM185  | Cdkn2a <sup>-/-</sup> _C57 | SIN.LV.PGK.GFP | LIVER | 3 | 118159053 | + | NM_170778    | Dpyd    | + |
| DMM109  | Cdkn2a <sup>-/-</sup> _C57 | SIN.LV.PGK.GFP | LIVER | 3 | 121513863 | - | NM_008991    | Abcd3   | - |
| DMM181  | Cdkn2a <sup>-/-</sup> _C57 | SIN.LV.PGK.GFP | LIVER | 3 | 122731050 | - | NM_021503    | Myoz2   | - |
| DMM112L | Cdkn2a <sup>-/-</sup> _C57 | SIN.LV.PGK.GFP | LIVER | 3 | 127196199 | - | NM_138593    | Larp7   | - |
| DMM101  | Cdkn2a <sup>-/-</sup> _C57 | SIN.LV.PGK.GFP | LIVER | 3 | 129716859 | - | NM_207209    | Sec24b  | - |
| DMM 88  | Cdkn2a <sup>-/-</sup> _C57 | SIN.LV.PGK.GFP | LIVER | 3 | 130023648 | + | NM_029838    | Col25a1 | + |
| DMM 112 | Cdkn2a <sup>-/-</sup> _C57 | SIN.LV.PGK.GFP | LIVER | 3 | 131334301 | - | NM_011863    | Papss1  | + |
| DMM112L | Cdkn2a <sup>-/-</sup> _C57 | SIN.LV.PGK.GFP | LIVER | 3 | 132325139 | - | NM_007926    | Aimp1   | - |
| DMM101  | Cdkn2a <sup>-/-</sup> _C57 | SIN.LV.PGK.GFP | LIVER | 3 | 133179016 | - | NM_001040400 | Tet2    | - |
| DMM181  | Cdkn2a <sup>-/-</sup> _C57 | SIN.LV.PGK.GFP | LIVER | 3 | 133976798 | + | NM_001004367 | Cxxc4   | + |
| DMM112L | Cdkn2a <sup>-/-</sup> _C57 | SIN.LV.PGK.GFP | LIVER | 3 | 135939815 | - | NM_001033350 | Bank1   | - |
| DMM112L | Cdkn2a <sup>-/-</sup> _C57 | SIN.LV.PGK.GFP | LIVER | 3 | 136427000 | + | NM_008913    | Ppp3ca  | + |
| DMM182  | Cdkn2a <sup>-/-</sup> _C57 | SIN.LV.PGK.GFP | LIVER | 3 | 136824014 | + | NM_016885    | Emcn    | + |
| DMM101  | Cdkn2a <sup>-/-</sup> _C57 | SIN.LV.PGK.GFP | LIVER | 3 | 140138888 | - | NM_008811    | Pdha2   | - |
| DMM184  | Cdkn2a <sup>-/-</sup> _C57 | SIN.LV.PGK.GFP | LIVER | 3 | 141560503 | - | NM_007560    | Bmpr1b  | - |
| DMM181  | Cdkn2a <sup>-/-</sup> _C57 | SIN.LV.PGK.GFP | LIVER | 3 | 141583047 | - | NM_007560    | Bmpr1b  | - |
| DMM183  | Cdkn2a <sup>-/-</sup> _C57 | SIN.LV.PGK.GFP | LIVER | 3 | 142008937 | - | NM_019809    | Pdlim5  | - |
| DMM112L | Cdkn2a <sup>-/-</sup> _C57 | SIN.LV.PGK.GFP | LIVER | 3 | 142015014 | - | NM_022554    | Pdlim5  | - |
| DMM 101 | Cdkn2a <sup>-/-</sup> _C57 | SIN.LV.PGK.GFP | LIVER | 3 | 142021211 | + | NM_022554    | Pdlim5  | - |
| DMM106  | Cdkn2a <sup>-/-</sup> _C57 | SIN.LV.PGK.GFP | LIVER | 3 | 142446903 | + | NM_145546    | Gtf2b   | + |
| DMM 112 | Cdkn2a <sup>-/-</sup> _C57 | SIN.LV.PGK.GFP | LIVER | 3 | 142453559 | - | NM_178654    | Pkn2    | - |
| DMM 101 | Cdkn2a <sup>-/-</sup> _C57 | SIN.LV.PGK.GFP | LIVER | 3 | 142525705 | - | NM_178654    | Pkn2    | - |
| DMM 101 | Cdkn2a <sup>-/-</sup> _C57 | SIN.LV.PGK.GFP | LIVER | 3 | 144229524 | - | NM_011828    | Hs2st1  | - |
| DMM106  | Cdkn2a <sup>-/-</sup> _C57 | SIN.LV.PGK.GFP | LIVER | 3 | 146119458 | + | NM_028836    | Ctbs    | + |
| DMM182  | Cdkn2a <sup>-/-</sup> _C57 | SIN.LV.PGK.GFP | LIVER | 3 | 151555829 | - | NM_008966    | Ptgfr   | - |



|         |                            |                |       |   |           |   |              |               |   |
|---------|----------------------------|----------------|-------|---|-----------|---|--------------|---------------|---|
| DMM 101 | Cdkn2a <sup>-/-</sup> _C57 | SIN.LV.PGK.GFP | LIVER | 3 | 152088686 | - | NM_198416    | Zzz3          | + |
| DMM112L | Cdkn2a <sup>-/-</sup> _C57 | SIN.LV.PGK.GFP | LIVER | 3 | 157645169 | + | NM_001013806 | Ankrd13c      | + |
| DMM 88  | Cdkn2a <sup>-/-</sup> _C57 | SIN.LV.PGK.GFP | LIVER | 3 | 157657731 | - | NM_001013806 | Ankrd13c      | + |
| DMM 101 | Cdkn2a <sup>-/-</sup> _C57 | SIN.LV.PGK.GFP | LIVER | 3 | 157679670 | + | NM_001093752 | Sfrs11        | - |
| DMM101  | Cdkn2a <sup>-/-</sup> _C57 | SIN.LV.PGK.GFP | LIVER | 4 | 3484678   | - | NM_028097    | Tmem68        | - |
| DMM 101 | Cdkn2a <sup>-/-</sup> _C57 | SIN.LV.PGK.GFP | LIVER | 4 | 3494883   | - | NM_028097    | Tmem68        | - |
| DMM 101 | Cdkn2a <sup>-/-</sup> _C57 | SIN.LV.PGK.GFP | LIVER | 4 | 3708148   | - | NM_001111096 | Lyn           | + |
| DMM181  | Cdkn2a <sup>-/-</sup> _C57 | SIN.LV.PGK.GFP | LIVER | 4 | 5086795   | - | NM_177730    | Impad1        | - |
| DMM 112 | Cdkn2a <sup>-/-</sup> _C57 | SIN.LV.PGK.GFP | LIVER | 4 | 7082250   | - | NM_145711    | Tox           | - |
| DMM112L | Cdkn2a <sup>-/-</sup> _C57 | SIN.LV.PGK.GFP | LIVER | 4 | 7249625   | - | NM_145711    | Tox           | - |
| DMM101  | Cdkn2a <sup>-/-</sup> _C57 | SIN.LV.PGK.GFP | LIVER | 4 | 12408904  | - | NM_026558    | Fam92a        | - |
| DMM109  | Cdkn2a <sup>-/-</sup> _C57 | SIN.LV.PGK.GFP | LIVER | 4 | 12459113  | - | NM_026558    | Fam92a        | - |
| DMM112L | Cdkn2a <sup>-/-</sup> _C57 | SIN.LV.PGK.GFP | LIVER | 4 | 14087660  | - | NM_001111026 | Runx1t1       | + |
| DMM 101 | Cdkn2a <sup>-/-</sup> _C57 | SIN.LV.PGK.GFP | LIVER | 4 | 15200561  | + | NM_181401    | Tmem64        | + |
| DMM183  | Cdkn2a <sup>-/-</sup> _C57 | SIN.LV.PGK.GFP | LIVER | 4 | 18369651  | + | NM_019724    | Mmp16         | + |
| DMM181  | Cdkn2a <sup>-/-</sup> _C57 | SIN.LV.PGK.GFP | LIVER | 4 | 20300964  | - | NM_172987    | Nkain3        | - |
| DMM103  | Cdkn2a <sup>-/-</sup> _C57 | SIN.LV.PGK.GFP | LIVER | 4 | 24457323  | + | NM_199467    | F730047E07Rik | + |
| DMM184  | Cdkn2a <sup>-/-</sup> _C57 | SIN.LV.PGK.GFP | LIVER | 4 | 25716576  | - | NM_010243    | Fut9          | - |
| DMM 101 | Cdkn2a <sup>-/-</sup> _C57 | SIN.LV.PGK.GFP | LIVER | 4 | 28906733  | - | NM_010141    | Epha7         | + |
| DMM112L | Cdkn2a <sup>-/-</sup> _C57 | SIN.LV.PGK.GFP | LIVER | 4 | 30303695  | + | NM_010141    | Epha7         | + |
| DMM112L | Cdkn2a <sup>-/-</sup> _C57 | SIN.LV.PGK.GFP | LIVER | 4 | 35039999  | - | NM_178061    | Mobk12b       | - |
| DMM 101 | Cdkn2a <sup>-/-</sup> _C57 | SIN.LV.PGK.GFP | LIVER | 4 | 44808981  | - | NM_138590    | Zcchc7        | + |
| DMM 112 | Cdkn2a <sup>-/-</sup> _C57 | SIN.LV.PGK.GFP | LIVER | 4 | 44853824  | - | NM_177027    | Zcchc7        | + |
| DMM183  | Cdkn2a <sup>-/-</sup> _C57 | SIN.LV.PGK.GFP | LIVER | 4 | 50102526  | - | NM_001033351 | Grin3a        | - |
| DMM 101 | Cdkn2a <sup>-/-</sup> _C57 | SIN.LV.PGK.GFP | LIVER | 4 | 52466274  | - | NM_008017    | Smc2          | + |
| DMM 112 | Cdkn2a <sup>-/-</sup> _C57 | SIN.LV.PGK.GFP | LIVER | 4 | 56802730  | + | NM_026079    | Ikbkap        | - |
| DMM112L | Cdkn2a <sup>-/-</sup> _C57 | SIN.LV.PGK.GFP | LIVER | 4 | 59501540  | - | NM_144904    | Rod1          | - |
| DMM 101 | Cdkn2a <sup>-/-</sup> _C57 | SIN.LV.PGK.GFP | LIVER | 4 | 59708622  | - | NM_153158    | E130308A19Rik | + |
| DMM182  | Cdkn2a <sup>-/-</sup> _C57 | SIN.LV.PGK.GFP | LIVER | 4 | 66088929  | - | NM_019514    | Astn2         | - |
| DMM181  | Cdkn2a <sup>-/-</sup> _C57 | SIN.LV.PGK.GFP | LIVER | 4 | 66276128  | - | NM_019514    | Astn2         | - |
| DMM 88  | Cdkn2a <sup>-/-</sup> _C57 | SIN.LV.PGK.GFP | LIVER | 4 | 69988113  | + | NM_145990    | Cdk5rap2      | - |

|           |                            |                |       |   |           |   |              |               |   |
|-----------|----------------------------|----------------|-------|---|-----------|---|--------------|---------------|---|
| DMM184    | Cdkn2a <sup>-/-</sup> _C57 | SIN.LV.PGK.GFP | LIVER | 4 | 73202284  | + | NM_001081644 | Gm428         | + |
| DMM 101   | Cdkn2a <sup>-/-</sup> _C57 | SIN.LV.PGK.GFP | LIVER | 4 | 73954323  | - | NM_144787    | Kdm4c         | + |
| DMM 112   | Cdkn2a <sup>-/-</sup> _C57 | SIN.LV.PGK.GFP | LIVER | 4 | 73987707  | - | NM_144787    | Kdm4c         | + |
| DMM184    | Cdkn2a <sup>-/-</sup> _C57 | SIN.LV.PGK.GFP | LIVER | 4 | 79160245  | - | NM_031202    | Tyrp1         | + |
| DMM 88    | Cdkn2a <sup>-/-</sup> _C57 | SIN.LV.PGK.GFP | LIVER | 4 | 79971333  | - | NM_031202    | Tyrp1         | + |
| DMM101    | Cdkn2a <sup>-/-</sup> _C57 | SIN.LV.PGK.GFP | LIVER | 4 | 81367824  | - | NM_010820    | Mpdz          | - |
| DMM 101   | Cdkn2a <sup>-/-</sup> _C57 | SIN.LV.PGK.GFP | LIVER | 4 | 82452093  | + | NM_026647    | Zdhhc21       | - |
| DMM104    | Cdkn2a <sup>-/-</sup> _C57 | SIN.LV.PGK.GFP | LIVER | 4 | 82470549  | - | NM_026647    | Zdhhc21       | - |
| DMM 101   | Cdkn2a <sup>-/-</sup> _C57 | SIN.LV.PGK.GFP | LIVER | 4 | 82559987  |   | NM_177863    | Frem1         | - |
| DMM 101   | Cdkn2a <sup>-/-</sup> _C57 | SIN.LV.PGK.GFP | LIVER | 4 | 83193380  | - | NM_001081012 | 4930473A06Rik | + |
| DMM112SA1 | Cdkn2a <sup>-/-</sup> _C57 | SIN.LV.PGK.GFP | LIVER | 4 | 84017968  | - | NM_172870    | Bnc2          | - |
| DMM101    | Cdkn2a <sup>-/-</sup> _C57 | SIN.LV.PGK.GFP | LIVER | 4 | 84637092  | + | NM_175275    | Cntln         | + |
| DMM112L   | Cdkn2a <sup>-/-</sup> _C57 | SIN.LV.PGK.GFP | LIVER | 4 | 84757773  | + | NM_175275    | Cntln         | + |
| DMM112L   | Cdkn2a <sup>-/-</sup> _C57 | SIN.LV.PGK.GFP | LIVER | 4 | 85258191  | + | NM_019535    | Sh3gl2        | + |
| DMM101    | Cdkn2a <sup>-/-</sup> _C57 | SIN.LV.PGK.GFP | LIVER | 4 | 88073832  | - | NM_025760    | Ptplad2       | - |
| DMM182    | Cdkn2a <sup>-/-</sup> _C57 | SIN.LV.PGK.GFP | LIVER | 4 | 89966492  | + | NM_153102    | Zfp352        | + |
| DMM112L   | Cdkn2a <sup>-/-</sup> _C57 | SIN.LV.PGK.GFP | LIVER | 4 | 93180783  | - | NM_026954    | Tusc1         | - |
| DMM182    | Cdkn2a <sup>-/-</sup> _C57 | SIN.LV.PGK.GFP | LIVER | 4 | 95402622  | + | NM_029347    | Fggy          | + |
| DMM 112   | Cdkn2a <sup>-/-</sup> _C57 | SIN.LV.PGK.GFP | LIVER | 4 | 98653071  | - | NM_026082    | Dock7         | - |
| DMM 112   | Cdkn2a <sup>-/-</sup> _C57 | SIN.LV.PGK.GFP | LIVER | 4 | 98712428  | - | NM_026082    | Dock7         | - |
| DMM112L   | Cdkn2a <sup>-/-</sup> _C57 | SIN.LV.PGK.GFP | LIVER | 4 | 99428460  | + | NM_001081264 | Alg6          | + |
| DMM106    | Cdkn2a <sup>-/-</sup> _C57 | SIN.LV.PGK.GFP | LIVER | 4 | 102204539 | + | NM_019840    | Pde4b         | + |
| DMM 101   | Cdkn2a <sup>-/-</sup> _C57 | SIN.LV.PGK.GFP | LIVER | 4 | 102270273 | + | NM_019840    | Pde4b         | + |
| DMM 88    | Cdkn2a <sup>-/-</sup> _C57 | SIN.LV.PGK.GFP | LIVER | 4 | 102806980 | + | NM_001039081 | Mier1         | + |
| DMM104    | Cdkn2a <sup>-/-</sup> _C57 | SIN.LV.PGK.GFP | LIVER | 4 | 108589250 | + | NM_023537    | Rab3b         | + |
| DMM184    | Cdkn2a <sup>-/-</sup> _C57 | SIN.LV.PGK.GFP | LIVER | 4 | 108970845 | + | NM_007943    | Eps15         | + |
| DMM 88    | Cdkn2a <sup>-/-</sup> _C57 | SIN.LV.PGK.GFP | LIVER | 4 | 109534712 | + | NM_007983    | Faf1          | + |
| DMM112L   | Cdkn2a <sup>-/-</sup> _C57 | SIN.LV.PGK.GFP | LIVER | 4 | 111942748 | + | NM_001102474 | Skint3        | + |
| DMM181    | Cdkn2a <sup>-/-</sup> _C57 | SIN.LV.PGK.GFP | LIVER | 4 | 116570913 | + | NM_001029912 | Zswim5        | + |
| DMM101    | Cdkn2a <sup>-/-</sup> _C57 | SIN.LV.PGK.GFP | LIVER | 4 | 126789100 | + | NM_177462    | Zmym6         | + |
| DMM 112   | Cdkn2a <sup>-/-</sup> _C57 | SIN.LV.PGK.GFP | LIVER | 4 | 130230770 | - | NM_001159603 | Pum1          | + |

|         |                            |                |       |   |           |   |              |           |   |
|---------|----------------------------|----------------|-------|---|-----------|---|--------------|-----------|---|
| DMM183  | Cdkn2a <sup>-/-</sup> _C57 | SIN.LV.PGK.GFP | LIVER | 4 | 132389297 | - | NM_146154    | Ppp1r8    | - |
| DMM 101 | Cdkn2a <sup>-/-</sup> _C57 | SIN.LV.PGK.GFP | LIVER | 4 | 142721204 | - | NM_001081355 | Prdm2     | - |
| DMM109  | Cdkn2a <sup>-/-</sup> _C57 | SIN.LV.PGK.GFP | LIVER | 4 | 147888554 | + | NM_020009    | Mtor      | + |
| DMM182  | Cdkn2a <sup>-/-</sup> _C57 | SIN.LV.PGK.GFP | LIVER | 4 | 150426533 | - | NM_009498    | Vamp3     | - |
| DMM181  | Cdkn2a <sup>-/-</sup> _C57 | SIN.LV.PGK.GFP | LIVER | 4 | 153920871 | - | NM_027504    | Prdm16    | - |
| DMM 101 | Cdkn2a <sup>-/-</sup> _C57 | SIN.LV.PGK.GFP | LIVER | 5 | 3973946   | - | NM_194462    | Akap9     | + |
| DMM109  | Cdkn2a <sup>-/-</sup> _C57 | SIN.LV.PGK.GFP | LIVER | 5 | 8073255   | - | NM_001098225 | Adam22    | - |
| DMM 101 | Cdkn2a <sup>-/-</sup> _C57 | SIN.LV.PGK.GFP | LIVER | 5 | 8344649   | + | NM_001007220 | Adam22    | - |
| DMM 101 | Cdkn2a <sup>-/-</sup> _C57 | SIN.LV.PGK.GFP | LIVER | 5 | 8962644   | - | NM_023733    | Crot      | - |
| DMM184  | Cdkn2a <sup>-/-</sup> _C57 | SIN.LV.PGK.GFP | LIVER | 5 | 10589939  | + | NR_003596    | Gm6455    | + |
| DMM182  | Cdkn2a <sup>-/-</sup> _C57 | SIN.LV.PGK.GFP | LIVER | 5 | 13181097  | + | NM_009152    | Sema3a    | + |
| DMM182  | Cdkn2a <sup>-/-</sup> _C57 | SIN.LV.PGK.GFP | LIVER | 5 | 13507789  | + | NM_009152    | Sema3a    | + |
| DMM 101 | Cdkn2a <sup>-/-</sup> _C57 | SIN.LV.PGK.GFP | LIVER | 5 | 15997811  | + | NM_010427    | Hgf       | + |
| DMM112L | Cdkn2a <sup>-/-</sup> _C57 | SIN.LV.PGK.GFP | LIVER | 5 | 17489945  | + | NM_001081143 | Gnat3     | + |
| DMM 101 | Cdkn2a <sup>-/-</sup> _C57 | SIN.LV.PGK.GFP | LIVER | 5 | 19594184  | + | NM_015823    | Magi2     | + |
| DMM 88  | Cdkn2a <sup>-/-</sup> _C57 | SIN.LV.PGK.GFP | LIVER | 5 | 20410723  | + | NM_001080977 | Rsb1l1    | - |
| DMM101  | Cdkn2a <sup>-/-</sup> _C57 | SIN.LV.PGK.GFP | LIVER | 5 | 20460693  | + | NM_001080977 | Rsb1l1    | - |
| DMM 101 | Cdkn2a <sup>-/-</sup> _C57 | SIN.LV.PGK.GFP | LIVER | 5 | 22030469  | + | NM_011959    | Orc5l     | - |
| DMM103  | Cdkn2a <sup>-/-</sup> _C57 | SIN.LV.PGK.GFP | LIVER | 5 | 22039576  | - | NM_011959    | Orc5l     | - |
| DMM105  | Cdkn2a <sup>-/-</sup> _C57 | SIN.LV.PGK.GFP | LIVER | 5 | 22952327  | + | NM_009274    | Srpk2     | - |
| DMM101  | Cdkn2a <sup>-/-</sup> _C57 | SIN.LV.PGK.GFP | LIVER | 5 | 23101796  | - | NM_009274    | Srpk2     | - |
| DMM182  | Cdkn2a <sup>-/-</sup> _C57 | SIN.LV.PGK.GFP | LIVER | 5 | 27752842  | + | NM_001136060 | Dpp6      | + |
| DMM 112 | Cdkn2a <sup>-/-</sup> _C57 | SIN.LV.PGK.GFP | LIVER | 5 | 28710854  |   | NM_028234    | Prr8      | + |
| DMM 101 | Cdkn2a <sup>-/-</sup> _C57 | SIN.LV.PGK.GFP | LIVER | 5 | 29913484  | + | NM_133907    | Ube3c     | + |
| DMM182  | Cdkn2a <sup>-/-</sup> _C57 | SIN.LV.PGK.GFP | LIVER | 5 | 30580298  | + | NM_027652    | D5Wsu178e | + |
| DMM181  | Cdkn2a <sup>-/-</sup> _C57 | SIN.LV.PGK.GFP | LIVER | 5 | 31163921  | + | NM_133350    | Mapre3    | + |
| DMM182  | Cdkn2a <sup>-/-</sup> _C57 | SIN.LV.PGK.GFP | LIVER | 5 | 34176098  | + | NM_001081102 | Whsc1     | + |
| DMM112L | Cdkn2a <sup>-/-</sup> _C57 | SIN.LV.PGK.GFP | LIVER | 5 | 35215770  | + | NM_010414    | Htt       | + |
| DMM111  | Cdkn2a <sup>-/-</sup> _C57 | SIN.LV.PGK.GFP | LIVER | 5 | 39320417  | - | NM_013748    | Clnk      | - |
| DMM111  | Cdkn2a <sup>-/-</sup> _C57 | SIN.LV.PGK.GFP | LIVER | 5 | 39320660  | - | NM_013748    | Clnk      | - |
| DMM112L | Cdkn2a <sup>-/-</sup> _C57 | SIN.LV.PGK.GFP | LIVER | 5 | 44152962  | - | NM_178729    | Fbx15     | - |

|         |                            |                |       |   |           |   |              |          |   |
|---------|----------------------------|----------------|-------|---|-----------|---|--------------|----------|---|
| DMM 101 | Cdkn2a <sup>-/-</sup> _C57 | SIN.LV.PGK.GFP | LIVER | 5 | 48768351  | + | NM_025755    | Pacrgl   | + |
| DMM112L | Cdkn2a <sup>-/-</sup> _C57 | SIN.LV.PGK.GFP | LIVER | 5 | 54458150  | + | NM_001081103 | Stim2    | + |
| DMM181  | Cdkn2a <sup>-/-</sup> _C57 | SIN.LV.PGK.GFP | LIVER | 5 | 58309055  | + | NM_001122758 | Pcdh7    | + |
| DMM184  | Cdkn2a <sup>-/-</sup> _C57 | SIN.LV.PGK.GFP | LIVER | 5 | 58514829  | + | NM_001122758 | Pcdh7    | + |
| DMM 88  | Cdkn2a <sup>-/-</sup> _C57 | SIN.LV.PGK.GFP | LIVER | 5 | 59145384  | - | NM_001122758 | Pcdh7    | + |
| DMM184  | Cdkn2a <sup>-/-</sup> _C57 | SIN.LV.PGK.GFP | LIVER | 5 | 59722838  | - | NM_001122758 | Pcdh7    | + |
| DMM101  | Cdkn2a <sup>-/-</sup> _C57 | SIN.LV.PGK.GFP | LIVER | 5 | 59974609  | - | NM_001122758 | Pcdh7    | + |
| DMM112L | Cdkn2a <sup>-/-</sup> _C57 | SIN.LV.PGK.GFP | LIVER | 5 | 63135552  | - | NM_178407    | Arap2    | - |
| DMM101  | Cdkn2a <sup>-/-</sup> _C57 | SIN.LV.PGK.GFP | LIVER | 5 | 75401833  | - | NM_028850    | Chic2    | - |
| DMM 101 | Cdkn2a <sup>-/-</sup> _C57 | SIN.LV.PGK.GFP | LIVER | 5 | 81552457  | - | NM_198702    | Lphn3    | + |
| DMM112L | Cdkn2a <sup>-/-</sup> _C57 | SIN.LV.PGK.GFP | LIVER | 5 | 81734888  | + | NM_198702    | Lphn3    | + |
| DMM183  | Cdkn2a <sup>-/-</sup> _C57 | SIN.LV.PGK.GFP | LIVER | 5 | 82489546  | - | NM_198702    | Lphn3    | + |
| DMM183  | Cdkn2a <sup>-/-</sup> _C57 | SIN.LV.PGK.GFP | LIVER | 5 | 86536514  | - | NM_172712    | Uba6     | - |
| DMM181  | Cdkn2a <sup>-/-</sup> _C57 | SIN.LV.PGK.GFP | LIVER | 5 | 87255150  | + | NM_177680    | Ythdc1   | + |
| DMM112L | Cdkn2a <sup>-/-</sup> _C57 | SIN.LV.PGK.GFP | LIVER | 5 | 90853864  | + | NM_009654    | Alb      | + |
| DMM 101 | Cdkn2a <sup>-/-</sup> _C57 | SIN.LV.PGK.GFP | LIVER | 5 | 91706681  | - | NM_007568    | Btc      | - |
| DMM182  | Cdkn2a <sup>-/-</sup> _C57 | SIN.LV.PGK.GFP | LIVER | 5 | 96536596  | - | NM_144910    | Cnot6l   | - |
| DMM184  | Cdkn2a <sup>-/-</sup> _C57 | SIN.LV.PGK.GFP | LIVER | 5 | 99836238  | - | NM_145839    | Rasgef1b | - |
| DMM101  | Cdkn2a <sup>-/-</sup> _C57 | SIN.LV.PGK.GFP | LIVER | 5 | 100391230 | - | NM_001077265 | Hnrnpd   | - |
| DMM183  | Cdkn2a <sup>-/-</sup> _C57 | SIN.LV.PGK.GFP | LIVER | 5 | 106311771 | + | NM_018759    | Zfp326   | + |
| DMM184  | Cdkn2a <sup>-/-</sup> _C57 | SIN.LV.PGK.GFP | LIVER | 5 | 107010212 | - | NM_026856    | Zfp644   | - |
| DMM182  | Cdkn2a <sup>-/-</sup> _C57 | SIN.LV.PGK.GFP | LIVER | 5 | 123681117 | + | NM_026000    | Psm9     | + |
| DMM182  | Cdkn2a <sup>-/-</sup> _C57 | SIN.LV.PGK.GFP | LIVER | 5 | 124638666 | - | NM_011256    | Pitpm2   | - |
| DMM 101 | Cdkn2a <sup>-/-</sup> _C57 | SIN.LV.PGK.GFP | LIVER | 5 | 128081937 | + | NM_133895    | Slc15a4  | - |
| DMM183  | Cdkn2a <sup>-/-</sup> _C57 | SIN.LV.PGK.GFP | LIVER | 5 | 128965753 | - | NM_172885    | Tmem132d | - |
| DMM 105 | Cdkn2a <sup>-/-</sup> _C57 | SIN.LV.PGK.GFP | LIVER | 5 | 140718949 | + | NM_010752    | Mad11l   | - |
| DMM184  | Cdkn2a <sup>-/-</sup> _C57 | SIN.LV.PGK.GFP | LIVER | 5 | 143685360 | - | NM_007393    | Actb     | - |
| DMM112L | Cdkn2a <sup>-/-</sup> _C57 | SIN.LV.PGK.GFP | LIVER | 5 | 144212486 | + | NM_144915    | Daglb    | + |
| DMM182  | Cdkn2a <sup>-/-</sup> _C57 | SIN.LV.PGK.GFP | LIVER | 5 | 148326426 | + | NM_028291    | Pan3     | + |
| DMM 101 | Cdkn2a <sup>-/-</sup> _C57 | SIN.LV.PGK.GFP | LIVER | 5 | 149339443 | + | NM_011908    | Ubl3     | - |
| DMM182  | Cdkn2a <sup>-/-</sup> _C57 | SIN.LV.PGK.GFP | LIVER | 5 | 149343907 | - | NM_011908    | Ubl3     | - |

|         |                            |                |       |   |          |   |              |               |   |
|---------|----------------------------|----------------|-------|---|----------|---|--------------|---------------|---|
| DMM 88  | Cdkn2a <sup>-/-</sup> _C57 | SIN.LV.PGK.GFP | LIVER | 6 | 3540463  | - | NM_024260    | Ccdc132       | + |
| DMM182  | Cdkn2a <sup>-/-</sup> _C57 | SIN.LV.PGK.GFP | LIVER | 6 | 4542174  | + | NM_145398    | Casd1         | + |
| DMM185  | Cdkn2a <sup>-/-</sup> _C57 | SIN.LV.PGK.GFP | LIVER | 6 | 4913539  | + | NM_181595    | Ppp1r9a       | + |
| DMM103  | Cdkn2a <sup>-/-</sup> _C57 | SIN.LV.PGK.GFP | LIVER | 6 | 5326991  | + | NM_023048    | Asb4          | + |
| DMM 112 | Cdkn2a <sup>-/-</sup> _C57 | SIN.LV.PGK.GFP | LIVER | 6 | 8531595  | - | NM_133236    | Glcc1         | + |
| DMM184  | Cdkn2a <sup>-/-</sup> _C57 | SIN.LV.PGK.GFP | LIVER | 6 | 12015481 | + | NR_003631    | Gm6578        | - |
| DMM184  | Cdkn2a <sup>-/-</sup> _C57 | SIN.LV.PGK.GFP | LIVER | 6 | 12692946 | - | NM_027992    | Tmem106b      | + |
| DMM101  | Cdkn2a <sup>-/-</sup> _C57 | SIN.LV.PGK.GFP | LIVER | 6 | 15787649 | + | NM_175088    | Mdfic         | + |
| DMM182  | Cdkn2a <sup>-/-</sup> _C57 | SIN.LV.PGK.GFP | LIVER | 6 | 15861755 | + | NM_175088    | Mdfic         | + |
| DMM101  | Cdkn2a <sup>-/-</sup> _C57 | SIN.LV.PGK.GFP | LIVER | 6 | 16911665 | - | NM_031198    | Tcfec         | - |
| DMM101  | Cdkn2a <sup>-/-</sup> _C57 | SIN.LV.PGK.GFP | LIVER | 6 | 22284653 | - | NM_138587    | Fam3c         | - |
| DMM 101 | Cdkn2a <sup>-/-</sup> _C57 | SIN.LV.PGK.GFP | LIVER | 6 | 24945881 | - | NM_177013    | 6332401O19Rik | - |
| DMM 105 | Cdkn2a <sup>-/-</sup> _C57 | SIN.LV.PGK.GFP | LIVER | 6 | 24956217 | + | NM_177013    | 6332401O19Rik | - |
| DMM112L | Cdkn2a <sup>-/-</sup> _C57 | SIN.LV.PGK.GFP | LIVER | 6 | 26353717 | + | NM_133931    | Pot1a         | - |
| DMM181  | Cdkn2a <sup>-/-</sup> _C57 | SIN.LV.PGK.GFP | LIVER | 6 | 33273860 | + | NM_009148    | Exoc4         | + |
| DMM 101 | Cdkn2a <sup>-/-</sup> _C57 | SIN.LV.PGK.GFP | LIVER | 6 | 35459064 | - | NM_008098    | Mtpn          | - |
| DMM101  | Cdkn2a <sup>-/-</sup> _C57 | SIN.LV.PGK.GFP | LIVER | 6 | 36914701 | - | NM_001081206 | Dgki          | - |
| DMM 101 | Cdkn2a <sup>-/-</sup> _C57 | SIN.LV.PGK.GFP | LIVER | 6 | 37380468 | - | NM_178661    | Creb3l2       | - |
| DMM184  | Cdkn2a <sup>-/-</sup> _C57 | SIN.LV.PGK.GFP | LIVER | 6 | 37914483 | + | NM_145076    | Trim24        | + |
| DMM 88  | Cdkn2a <sup>-/-</sup> _C57 | SIN.LV.PGK.GFP | LIVER | 6 | 38460880 | + | NM_177185    | Ubn2          | + |
| DMM103  | Cdkn2a <sup>-/-</sup> _C57 | SIN.LV.PGK.GFP | LIVER | 6 | 39599226 | - | NM_139294    | Braf          | - |
| DMM112L | Cdkn2a <sup>-/-</sup> _C57 | SIN.LV.PGK.GFP | LIVER | 6 | 43514154 | - | NM_013861    | Tpk1          | - |
| DMM109  | Cdkn2a <sup>-/-</sup> _C57 | SIN.LV.PGK.GFP | LIVER | 6 | 56110231 | - | NM_001025568 | Pde1c         | - |
| DMM182  | Cdkn2a <sup>-/-</sup> _C57 | SIN.LV.PGK.GFP | LIVER | 6 | 57614369 | - | NM_025574    | Pigy          | - |
| DMM182  | Cdkn2a <sup>-/-</sup> _C57 | SIN.LV.PGK.GFP | LIVER | 6 | 58596894 | + | NM_011920    | Abcg2         | + |
| DMM101  | Cdkn2a <sup>-/-</sup> _C57 | SIN.LV.PGK.GFP | LIVER | 6 | 58803972 | + | NM_028705    | Herc3         | + |
| DMM101  | Cdkn2a <sup>-/-</sup> _C57 | SIN.LV.PGK.GFP | LIVER | 6 | 64132671 | + | NM_008167    | Grid2         | + |
| DMM 101 | Cdkn2a <sup>-/-</sup> _C57 | SIN.LV.PGK.GFP | LIVER | 6 | 65006038 | - | NM_007958    | Smarcad1      | + |
| DMM 101 | Cdkn2a <sup>-/-</sup> _C57 | SIN.LV.PGK.GFP | LIVER | 6 | 65006398 | - | NM_007958    | Smarcad1      | + |
| DMM101  | Cdkn2a <sup>-/-</sup> _C57 | SIN.LV.PGK.GFP | LIVER | 6 | 65827512 | + | NM_027547    | Prdm5         | + |
| DMM181  | Cdkn2a <sup>-/-</sup> _C57 | SIN.LV.PGK.GFP | LIVER | 6 | 66049814 | + | NR_003637    | 4930544G11Rik | + |

|         |                            |                |       |   |           |   |              |          |   |
|---------|----------------------------|----------------|-------|---|-----------|---|--------------|----------|---|
| DMM 112 | Cdkn2a <sup>-/-</sup> _C57 | SIN.LV.PGK.GFP | LIVER | 6 | 66889630  | - | NM_025278    | Gng12    | + |
| DMM182  | Cdkn2a <sup>-/-</sup> _C57 | SIN.LV.PGK.GFP | LIVER | 6 | 72838281  | - | NM_019715    | Kcmf1    | - |
| DMM112L | Cdkn2a <sup>-/-</sup> _C57 | SIN.LV.PGK.GFP | LIVER | 6 | 76212483  | - | NM_001109764 | Ctnna2   | - |
| DMM 105 | Cdkn2a <sup>-/-</sup> _C57 | SIN.LV.PGK.GFP | LIVER | 6 | 81569915  | + | NM_177884    | AW146020 | + |
| DMM101  | Cdkn2a <sup>-/-</sup> _C57 | SIN.LV.PGK.GFP | LIVER | 6 | 81887056  | + | NM_177884    | AW146020 | + |
| DMM184  | Cdkn2a <sup>-/-</sup> _C57 | SIN.LV.PGK.GFP | LIVER | 6 | 82758544  | - | NM_013820    | Hk2      | - |
| DMM182  | Cdkn2a <sup>-/-</sup> _C57 | SIN.LV.PGK.GFP | LIVER | 6 | 86851542  | + | NM_001040106 | Aak1     | + |
| DMM 112 | Cdkn2a <sup>-/-</sup> _C57 | SIN.LV.PGK.GFP | LIVER | 6 | 90533694  | + | NM_027406    | Aldh11l  | + |
| DMM 101 | Cdkn2a <sup>-/-</sup> _C57 | SIN.LV.PGK.GFP | LIVER | 6 | 91628285  | + | NM_009320    | Slc6a6   | + |
| DMM101  | Cdkn2a <sup>-/-</sup> _C57 | SIN.LV.PGK.GFP | LIVER | 6 | 93676667  | - | NM_001083321 | Magi1    | - |
| DMM112L | Cdkn2a <sup>-/-</sup> _C57 | SIN.LV.PGK.GFP | LIVER | 6 | 93711957  | - | NM_001083321 | Magi1    | - |
| DMM183  | Cdkn2a <sup>-/-</sup> _C57 | SIN.LV.PGK.GFP | LIVER | 6 | 94104138  | - | NM_001029850 | Magi1    | - |
| DMM101  | Cdkn2a <sup>-/-</sup> _C57 | SIN.LV.PGK.GFP | LIVER | 6 | 94455616  | + | NM_026255    | Slc25a26 | + |
| DMM183  | Cdkn2a <sup>-/-</sup> _C57 | SIN.LV.PGK.GFP | LIVER | 6 | 97152189  | - | NM_001111106 | Uba3     | - |
| DMM 105 | Cdkn2a <sup>-/-</sup> _C57 | SIN.LV.PGK.GFP | LIVER | 6 | 100807549 | + | NM_182939    | Ppp4r2   | + |
| DMM112L | Cdkn2a <sup>-/-</sup> _C57 | SIN.LV.PGK.GFP | LIVER | 6 | 101062149 | - | NM_018884    | Pdzrn3   | - |
| DMM182  | Cdkn2a <sup>-/-</sup> _C57 | SIN.LV.PGK.GFP | LIVER | 6 | 102974424 | + | NM_007697    | Chl1     | + |
| DMM182  | Cdkn2a <sup>-/-</sup> _C57 | SIN.LV.PGK.GFP | LIVER | 6 | 108191169 | + | NM_010585    | Itr1     | + |
| DMM182  | Cdkn2a <sup>-/-</sup> _C57 | SIN.LV.PGK.GFP | LIVER | 6 | 108567349 | - | NM_011498    | Bhlhe40  | + |
| DMM181  | Cdkn2a <sup>-/-</sup> _C57 | SIN.LV.PGK.GFP | LIVER | 6 | 115334537 | + | NM_001127330 | Pparg    | + |
| DMM101  | Cdkn2a <sup>-/-</sup> _C57 | SIN.LV.PGK.GFP | LIVER | 6 | 115393231 | + | NM_011146    | Pparg    | + |
| DMM 112 | Cdkn2a <sup>-/-</sup> _C57 | SIN.LV.PGK.GFP | LIVER | 6 | 119634500 | + | NM_053204    | Erc1     | - |
| DMM182  | Cdkn2a <sup>-/-</sup> _C57 | SIN.LV.PGK.GFP | LIVER | 6 | 119963978 | - | NM_198703    | Wnk1     | - |
| DMM182  | Cdkn2a <sup>-/-</sup> _C57 | SIN.LV.PGK.GFP | LIVER | 6 | 119982044 | - | NM_198703    | Wnk1     | - |
| DMM112L | Cdkn2a <sup>-/-</sup> _C57 | SIN.LV.PGK.GFP | LIVER | 6 | 129573269 | - | NM_001083322 | Klrl1    | - |
| DMM182  | Cdkn2a <sup>-/-</sup> _C57 | SIN.LV.PGK.GFP | LIVER | 6 | 134828764 | - | NM_008157    | Gpr19    | - |
| DMM101  | Cdkn2a <sup>-/-</sup> _C57 | SIN.LV.PGK.GFP | LIVER | 6 | 137667336 | + | NM_011499    | Strap    | + |
| DMM181  | Cdkn2a <sup>-/-</sup> _C57 | SIN.LV.PGK.GFP | LIVER | 6 | 140288119 | + | NM_144920    | Plekha5  | + |
| DMM103  | Cdkn2a <sup>-/-</sup> _C57 | SIN.LV.PGK.GFP | LIVER | 6 | 140505113 | + | NM_144920    | Plekha5  | + |
| DMM101  | Cdkn2a <sup>-/-</sup> _C57 | SIN.LV.PGK.GFP | LIVER | 6 | 142452463 | - | NM_008492    | Ldhh     | - |
| DMM 101 | Cdkn2a <sup>-/-</sup> _C57 | SIN.LV.PGK.GFP | LIVER | 6 | 147061558 | - | NM_001081237 | Klhdc5   | + |

|           |                            |                |       |   |           |   |              |               |   |
|-----------|----------------------------|----------------|-------|---|-----------|---|--------------|---------------|---|
| DMM106    | Cdkn2a <sup>-/-</sup> _C57 | SIN.LV.PGK.GFP | LIVER | 6 | 148838182 | - | NM_181541    | Caprin2       | - |
| DMM183    | Cdkn2a <sup>-/-</sup> _C57 | SIN.LV.PGK.GFP | LIVER | 6 | 148887791 | - | NM_019643    | Fam60a        | - |
| DMM 101   | Cdkn2a <sup>-/-</sup> _C57 | SIN.LV.PGK.GFP | LIVER | 7 | 3285166   | - | NM_001093764 | Myadm         | + |
| DMM 101   | Cdkn2a <sup>-/-</sup> _C57 | SIN.LV.PGK.GFP | LIVER | 7 | 6278812   |   | NM_001033249 | Zfp583        | - |
| DMM182    | Cdkn2a <sup>-/-</sup> _C57 | SIN.LV.PGK.GFP | LIVER | 7 | 17130330  | - | NM_172739    | Grf1          | - |
| DMM183    | Cdkn2a <sup>-/-</sup> _C57 | SIN.LV.PGK.GFP | LIVER | 7 | 28245455  | + | NM_144923    | Blvrb         | + |
| DMM 101   | Cdkn2a <sup>-/-</sup> _C57 | SIN.LV.PGK.GFP | LIVER | 7 | 28836207  | - | NM_011874    | Psmc4         | - |
| DMM 112   | Cdkn2a <sup>-/-</sup> _C57 | SIN.LV.PGK.GFP | LIVER | 7 | 35068877  |   | NM_172741    | 4931406P16Rik | - |
| DMM112SAI | Cdkn2a <sup>-/-</sup> _C57 | SIN.LV.PGK.GFP | LIVER | 7 | 38785625  | - | NM_011274    | C80913        | - |
| DMM181    | Cdkn2a <sup>-/-</sup> _C57 | SIN.LV.PGK.GFP | LIVER | 7 | 46721151  | + | NM_001004139 | Zfp619        | + |
| DMM182    | Cdkn2a <sup>-/-</sup> _C57 | SIN.LV.PGK.GFP | LIVER | 7 | 52837117  | + | NM_009737    | Bcat2         | + |
| DMM103    | Cdkn2a <sup>-/-</sup> _C57 | SIN.LV.PGK.GFP | LIVER | 7 | 56633513  | + | NM_175272    | Nav2          | + |
| DMM112L   | Cdkn2a <sup>-/-</sup> _C57 | SIN.LV.PGK.GFP | LIVER | 7 | 59104860  | + | NM_001115087 | Fancf         | - |
| DMM113    | Cdkn2a <sup>-/-</sup> _C57 | SIN.LV.PGK.GFP | LIVER | 7 | 63308612  | + | NM_010418    | Herc2         | + |
| DMM101    | Cdkn2a <sup>-/-</sup> _C57 | SIN.LV.PGK.GFP | LIVER | 7 | 66496024  | + | NM_001033962 | Ube3a         | + |
| DMM101    | Cdkn2a <sup>-/-</sup> _C57 | SIN.LV.PGK.GFP | LIVER | 7 | 71151617  | - | NM_021366    | Klf13         | - |
| DMM184    | Cdkn2a <sup>-/-</sup> _C57 | SIN.LV.PGK.GFP | LIVER | 7 | 73279360  | + | NM_001081163 | Chsy1         | + |
| DMM109    | Cdkn2a <sup>-/-</sup> _C57 | SIN.LV.PGK.GFP | LIVER | 7 | 73997565  | + | NM_001033877 | Adamts17      | + |
| DMM113    | Cdkn2a <sup>-/-</sup> _C57 | SIN.LV.PGK.GFP | LIVER | 7 | 77241150  | + | NM_009697    | Nr2f2         | - |
| DMM101    | Cdkn2a <sup>-/-</sup> _C57 | SIN.LV.PGK.GFP | LIVER | 7 | 80648980  | - | NM_001081345 | Chd2          | - |
| DMM 88    | Cdkn2a <sup>-/-</sup> _C57 | SIN.LV.PGK.GFP | LIVER | 7 | 82674360  | + | NM_029332    | Akap13        | + |
| DMM182    | Cdkn2a <sup>-/-</sup> _C57 | SIN.LV.PGK.GFP | LIVER | 7 | 87626114  | - | NM_001042527 | Blm           | - |
| DMM184    | Cdkn2a <sup>-/-</sup> _C57 | SIN.LV.PGK.GFP | LIVER | 7 | 91792826  | - | NM_022985    | Zfand6        | - |
| DMM182    | Cdkn2a <sup>-/-</sup> _C57 | SIN.LV.PGK.GFP | LIVER | 7 | 94810486  | + | NM_001081414 | Grm5          | + |
| DMM184    | Cdkn2a <sup>-/-</sup> _C57 | SIN.LV.PGK.GFP | LIVER | 7 | 96445594  | - | NM_028343    | Tmem135       | - |
| DMM181    | Cdkn2a <sup>-/-</sup> _C57 | SIN.LV.PGK.GFP | LIVER | 7 | 103553692 | + | NM_011858    | Odz4          | + |
| DMM 101   | Cdkn2a <sup>-/-</sup> _C57 | SIN.LV.PGK.GFP | LIVER | 7 | 109129161 | - | NM_133947    | Numa1         | + |
| DMM 112   | Cdkn2a <sup>-/-</sup> _C57 | SIN.LV.PGK.GFP | LIVER | 7 | 109315773 |   | NM_022979    | Nup98         | - |
| DMM182    | Cdkn2a <sup>-/-</sup> _C57 | SIN.LV.PGK.GFP | LIVER | 7 | 118826773 | - | NM_173739    | Galnt4        | - |
| DMM183    | Cdkn2a <sup>-/-</sup> _C57 | SIN.LV.PGK.GFP | LIVER | 7 | 119221661 | + | NM_133758    | Usp47         | + |
| DMM112L   | Cdkn2a <sup>-/-</sup> _C57 | SIN.LV.PGK.GFP | LIVER | 7 | 120702441 | - | NM_026143    | Far1          | + |

|         |                            |                |       |   |           |   |              |               |   |
|---------|----------------------------|----------------|-------|---|-----------|---|--------------|---------------|---|
| DMM109  | Cdkn2a <sup>-/-</sup> _C57 | SIN.LV.PGK.GFP | LIVER | 7 | 127842236 | + | NM_001040136 | 4930408O21Rik | - |
| DMM111  | Cdkn2a <sup>-/-</sup> _C57 | SIN.LV.PGK.GFP | LIVER | 7 | 130469395 | - | NM_001122640 | Arhgap17      | - |
| DMM 101 | Cdkn2a <sup>-/-</sup> _C57 | SIN.LV.PGK.GFP | LIVER | 7 | 137647766 |   | NM_001136054 | Ate1          | - |
| DMM181  | Cdkn2a <sup>-/-</sup> _C57 | SIN.LV.PGK.GFP | LIVER | 7 | 148682218 | - | NM_001142681 | Chid1         | - |
| DMM184  | Cdkn2a <sup>-/-</sup> _C57 | SIN.LV.PGK.GFP | LIVER | 8 | 4198158   | + | NM_001039578 | Evi5l         | + |
| DMM182  | Cdkn2a <sup>-/-</sup> _C57 | SIN.LV.PGK.GFP | LIVER | 8 | 4408299   | + | NM_009138    | Ccl25         | + |
| DMM112L | Cdkn2a <sup>-/-</sup> _C57 | SIN.LV.PGK.GFP | LIVER | 8 | 4763497   | - | NM_011369    | Shcbp1        | - |
| DMM184  | Cdkn2a <sup>-/-</sup> _C57 | SIN.LV.PGK.GFP | LIVER | 8 | 5262559   | - | NM_011388    | Slc10a2       | - |
| DMM182  | Cdkn2a <sup>-/-</sup> _C57 | SIN.LV.PGK.GFP | LIVER | 8 | 8680233   | - | NM_176849    | Arglu1        | - |
| DMM 88  | Cdkn2a <sup>-/-</sup> _C57 | SIN.LV.PGK.GFP | LIVER | 8 | 9970736   | - | NM_176953    | Lig4          | - |
| DMM 88  | Cdkn2a <sup>-/-</sup> _C57 | SIN.LV.PGK.GFP | LIVER | 8 | 11041352  | - | NM_001081212 | Irs2          | - |
| DMM 101 | Cdkn2a <sup>-/-</sup> _C57 | SIN.LV.PGK.GFP | LIVER | 8 | 11337850  | + | NM_009932    | Col4a2        | + |
| DMM109  | Cdkn2a <sup>-/-</sup> _C57 | SIN.LV.PGK.GFP | LIVER | 8 | 18948134  | - | NM_001113350 | Xkr5          | - |
| DMM103  | Cdkn2a <sup>-/-</sup> _C57 | SIN.LV.PGK.GFP | LIVER | 8 | 24206129  | + | NM_031158    | Ank1          | + |
| DMM 101 | Cdkn2a <sup>-/-</sup> _C57 | SIN.LV.PGK.GFP | LIVER | 8 | 24305956  | - | NM_018743    | Agpat6        | - |
| DMM 88  | Cdkn2a <sup>-/-</sup> _C57 | SIN.LV.PGK.GFP | LIVER | 8 | 26155290  | - | NM_031257    | Plekha2       | + |
| DMM182  | Cdkn2a <sup>-/-</sup> _C57 | SIN.LV.PGK.GFP | LIVER | 8 | 37378705  | - | NM_001081150 | Lonrf1        | - |
| DMM113  | Cdkn2a <sup>-/-</sup> _C57 | SIN.LV.PGK.GFP | LIVER | 8 | 40712449  | - | NM_001113326 | Msr1          | - |
| DMM 88  | Cdkn2a <sup>-/-</sup> _C57 | SIN.LV.PGK.GFP | LIVER | 8 | 41408427  | + | NM_030610    | Fgf20         | - |
| DMM 101 | Cdkn2a <sup>-/-</sup> _C57 | SIN.LV.PGK.GFP | LIVER | 8 | 41426231  | + | NM_030610    | Fgf20         | - |
| DMM 88  | Cdkn2a <sup>-/-</sup> _C57 | SIN.LV.PGK.GFP | LIVER | 8 | 41437517  | + | NM_030610    | Fgf20         | - |
| DMM182  | Cdkn2a <sup>-/-</sup> _C57 | SIN.LV.PGK.GFP | LIVER | 8 | 41438670  | + | NM_030610    | Fgf20         | - |
| DMM 101 | Cdkn2a <sup>-/-</sup> _C57 | SIN.LV.PGK.GFP | LIVER | 8 | 41610766  | + | NM_033560    | Vps37a        | + |
| DMM184  | Cdkn2a <sup>-/-</sup> _C57 | SIN.LV.PGK.GFP | LIVER | 8 | 41705475  | - | NM_001040699 | Mtmr7         | - |
| DMM 88  | Cdkn2a <sup>-/-</sup> _C57 | SIN.LV.PGK.GFP | LIVER | 8 | 41707803  | + | NM_001040699 | Mtmr7         | - |
| DMM182  | Cdkn2a <sup>-/-</sup> _C57 | SIN.LV.PGK.GFP | LIVER | 8 | 45872463  | + | NM_001081286 | Fat1          | + |
| DMM 101 | Cdkn2a <sup>-/-</sup> _C57 | SIN.LV.PGK.GFP | LIVER | 8 | 48626273  | - | NM_203507    | Rwdd4a        | + |
| DMM103  | Cdkn2a <sup>-/-</sup> _C57 | SIN.LV.PGK.GFP | LIVER | 8 | 54695799  | - | NM_146208    | Neil3         | - |
| DMM101  | Cdkn2a <sup>-/-</sup> _C57 | SIN.LV.PGK.GFP | LIVER | 8 | 59052535  | + | NM_015791    | Fbxo8         | + |
| DMM184  | Cdkn2a <sup>-/-</sup> _C57 | SIN.LV.PGK.GFP | LIVER | 8 | 61387176  | - | NM_175032    | 4930431L04Rik | - |
| DMM182  | Cdkn2a <sup>-/-</sup> _C57 | SIN.LV.PGK.GFP | LIVER | 8 | 66695503  | - | NM_009390    | Tll1          | - |



|         |                            |                |       |   |           |   |              |               |   |
|---------|----------------------------|----------------|-------|---|-----------|---|--------------|---------------|---|
| DMM 112 | Cdkn2a <sup>-/-</sup> _C57 | SIN.LV.PGK.GFP | LIVER | 8 | 70660887  | + | NM_028182    | Sh2d4a        | + |
| DMM185  | Cdkn2a <sup>-/-</sup> _C57 | SIN.LV.PGK.GFP | LIVER | 8 | 81140770  | + | NM_029736    | Slc10a7       | + |
| DMM 88  | Cdkn2a <sup>-/-</sup> _C57 | SIN.LV.PGK.GFP | LIVER | 8 | 83887742  | + | NM_027554    | Usp38         | - |
| DMM182  | Cdkn2a <sup>-/-</sup> _C57 | SIN.LV.PGK.GFP | LIVER | 8 | 88243041  | - | NM_028007    | Itfg1         | - |
| DMM103  | Cdkn2a <sup>-/-</sup> _C57 | SIN.LV.PGK.GFP | LIVER | 8 | 88536996  | + | NM_199446    | Phkb          | + |
| DMM182  | Cdkn2a <sup>-/-</sup> _C57 | SIN.LV.PGK.GFP | LIVER | 8 | 108612071 | + | NM_010901    | Nfatc3        | + |
| DMM 101 | Cdkn2a <sup>-/-</sup> _C57 | SIN.LV.PGK.GFP | LIVER | 8 | 112451169 | - | NM_001122594 | Phlpp2        | + |
| DMM 88  | Cdkn2a <sup>-/-</sup> _C57 | SIN.LV.PGK.GFP | LIVER | 8 | 115559878 | - | NM_130457    | Cntnap4       | + |
| DMM106  | Cdkn2a <sup>-/-</sup> _C57 | SIN.LV.PGK.GFP | LIVER | 8 | 116181782 | + | NM_001048145 | 4930481F22Rik | + |
| DMM101  | Cdkn2a <sup>-/-</sup> _C57 | SIN.LV.PGK.GFP | LIVER | 8 | 119430254 | - | NM_026844    | 2310061C15Rik | - |
| DMM114  | Cdkn2a <sup>-/-</sup> _C57 | SIN.LV.PGK.GFP | LIVER | 9 | 3022753   | - | NM_026303    | Alkbh8        | + |
| DMM 101 | Cdkn2a <sup>-/-</sup> _C57 | SIN.LV.PGK.GFP | LIVER | 9 | 3025551   | - | NM_026303    | Alkbh8        | + |
| DMM114  | Cdkn2a <sup>-/-</sup> _C57 | SIN.LV.PGK.GFP | LIVER | 9 | 3026673   | - | NM_026303    | Alkbh8        | + |
| DMM 88  | Cdkn2a <sup>-/-</sup> _C57 | SIN.LV.PGK.GFP | LIVER | 9 | 7189856   | - | NM_029775    | Dcun1d5       | + |
| DMM101  | Cdkn2a <sup>-/-</sup> _C57 | SIN.LV.PGK.GFP | LIVER | 9 | 7323152   | + | NM_008605    | Mmp12         | + |
| DMM183  | Cdkn2a <sup>-/-</sup> _C57 | SIN.LV.PGK.GFP | LIVER | 9 | 22746591  | + | NM_178415    | Bbs9          | + |
| DMM 112 | Cdkn2a <sup>-/-</sup> _C57 | SIN.LV.PGK.GFP | LIVER | 9 | 24244050  | + | NM_172920    | Dpy19l1       | - |
| DMM 88  | Cdkn2a <sup>-/-</sup> _C57 | SIN.LV.PGK.GFP | LIVER | 9 | 35371648  |   | NM_029762    | Hyls1         | - |
| DMM182  | Cdkn2a <sup>-/-</sup> _C57 | SIN.LV.PGK.GFP | LIVER | 9 | 35373882  | + | NM_023292    | Pus3          | + |
| DMM184  | Cdkn2a <sup>-/-</sup> _C57 | SIN.LV.PGK.GFP | LIVER | 9 | 36654759  | + | NM_183171    | Fez1          | + |
| DMM109  | Cdkn2a <sup>-/-</sup> _C57 | SIN.LV.PGK.GFP | LIVER | 9 | 37320714  | + | NM_146222    | BC024479      | + |
| DMM182  | Cdkn2a <sup>-/-</sup> _C57 | SIN.LV.PGK.GFP | LIVER | 9 | 61901831  | - | NM_033320    | Glee          | - |
| DMM181  | Cdkn2a <sup>-/-</sup> _C57 | SIN.LV.PGK.GFP | LIVER | 9 | 70410542  | + | NM_025690    | Sltm          | + |
| DMM 101 | Cdkn2a <sup>-/-</sup> _C57 | SIN.LV.PGK.GFP | LIVER | 9 | 71856325  | + | NM_011544    | Tcf12         | - |
| DMM112L | Cdkn2a <sup>-/-</sup> _C57 | SIN.LV.PGK.GFP | LIVER | 9 | 74999494  | + | NM_010864    | Myo5a         | + |
| DMM112L | Cdkn2a <sup>-/-</sup> _C57 | SIN.LV.PGK.GFP | LIVER | 9 | 77384437  | - | NM_172528    | Lrrc1         | - |
| DMM112L | Cdkn2a <sup>-/-</sup> _C57 | SIN.LV.PGK.GFP | LIVER | 9 | 85464250  | - | NM_001081282 | Ibtk          | - |
| DMM 101 | Cdkn2a <sup>-/-</sup> _C57 | SIN.LV.PGK.GFP | LIVER | 9 | 85635097  | - | NM_001081282 | Ibtk          | - |
| DMM101  | Cdkn2a <sup>-/-</sup> _C57 | SIN.LV.PGK.GFP | LIVER | 9 | 86420218  | + | NM_177208    | Dopey1        | + |
| DMM182  | Cdkn2a <sup>-/-</sup> _C57 | SIN.LV.PGK.GFP | LIVER | 9 | 89668498  | - | NM_207260    | Ankrd34c      | - |
| DMM 101 | Cdkn2a <sup>-/-</sup> _C57 | SIN.LV.PGK.GFP | LIVER | 9 | 90197383  | - | NM_194334    | Tbc1d2b       | - |

|         |                            |                |       |    |           |   |              |               |   |
|---------|----------------------------|----------------|-------|----|-----------|---|--------------|---------------|---|
| DMM181  | Cdkn2a <sup>-/-</sup> _C57 | SIN.LV.PGK.GFP | LIVER | 9  | 90569535  | - | NM_194334    | Tbc1d2b       | - |
| DMM 112 | Cdkn2a <sup>-/-</sup> _C57 | SIN.LV.PGK.GFP | LIVER | 9  | 99418120  | + | NM_028768    | Armc8         | - |
| DMM113  | Cdkn2a <sup>-/-</sup> _C57 | SIN.LV.PGK.GFP | LIVER | 9  | 100690167 | + | NM_009282    | Stag1         | + |
| DMM112L | Cdkn2a <sup>-/-</sup> _C57 | SIN.LV.PGK.GFP | LIVER | 9  | 100756332 | + | NM_009282    | Stag1         | + |
| DMM 112 | Cdkn2a <sup>-/-</sup> _C57 | SIN.LV.PGK.GFP | LIVER | 9  | 100781615 | + | NM_009282    | Stag1         | + |
| DMM112L | Cdkn2a <sup>-/-</sup> _C57 | SIN.LV.PGK.GFP | LIVER | 9  | 100793649 | + | NM_009282    | Stag1         | + |
| DMM185  | Cdkn2a <sup>-/-</sup> _C57 | SIN.LV.PGK.GFP | LIVER | 9  | 101051724 | - | NM_001161362 | 3222402P14Rik | - |
| DMM112L | Cdkn2a <sup>-/-</sup> _C57 | SIN.LV.PGK.GFP | LIVER | 9  | 113656772 | + | NM_001114347 | Clasp2        | + |
| DMM 104 | Cdkn2a <sup>-/-</sup> _C57 | SIN.LV.PGK.GFP | LIVER | 9  | 113718353 |   | NM_001114347 | Clasp2        | + |
| DMM182  | Cdkn2a <sup>-/-</sup> _C57 | SIN.LV.PGK.GFP | LIVER | 9  | 113869427 | + | NM_001083319 | Ubp1          | + |
| DMM 101 | Cdkn2a <sup>-/-</sup> _C57 | SIN.LV.PGK.GFP | LIVER | 9  | 115989286 | + | NM_028638    | Gad11         | + |
| DMM 101 | Cdkn2a <sup>-/-</sup> _C57 | SIN.LV.PGK.GFP | LIVER | 10 | 9501948   | + | NM_001081344 | Stxbp5        | - |
| DMM 101 | Cdkn2a <sup>-/-</sup> _C57 | SIN.LV.PGK.GFP | LIVER | 10 | 9503148   | - | NM_001081344 | Stxbp5        | - |
| DMM112L | Cdkn2a <sup>-/-</sup> _C57 | SIN.LV.PGK.GFP | LIVER | 10 | 9504698   | - | NM_001081344 | Stxbp5        | - |
| DMM181  | Cdkn2a <sup>-/-</sup> _C57 | SIN.LV.PGK.GFP | LIVER | 10 | 11941636  | - | NM_011682    | Utrn          | - |
| DMM 112 | Cdkn2a <sup>-/-</sup> _C57 | SIN.LV.PGK.GFP | LIVER | 10 | 13791601  | + | NM_010437    | Hivep2        | + |
| DMM109  | Cdkn2a <sup>-/-</sup> _C57 | SIN.LV.PGK.GFP | LIVER | 10 | 13874031  | + | NM_010437    | Hivep2        | + |
| DMM 112 | Cdkn2a <sup>-/-</sup> _C57 | SIN.LV.PGK.GFP | LIVER | 10 | 16597092  | - | NM_010828    | Cited2        | + |
| DMM183  | Cdkn2a <sup>-/-</sup> _C57 | SIN.LV.PGK.GFP | LIVER | 10 | 16730092  | - | NM_010828    | Cited2        | + |
| DMM101  | Cdkn2a <sup>-/-</sup> _C57 | SIN.LV.PGK.GFP | LIVER | 10 | 19644239  | + | NM_008580    | Map3k5        | + |
| DMM182  | Cdkn2a <sup>-/-</sup> _C57 | SIN.LV.PGK.GFP | LIVER | 10 | 20040192  | + | NM_001025392 | Bclaf1        | + |
| DMM106  | Cdkn2a <sup>-/-</sup> _C57 | SIN.LV.PGK.GFP | LIVER | 10 | 20351265  | - | NM_013875    | Pde7b         | - |
| DMM184  | Cdkn2a <sup>-/-</sup> _C57 | SIN.LV.PGK.GFP | LIVER | 10 | 21536774  | + | NM_011361    | Sgk1          | + |
| DMM183  | Cdkn2a <sup>-/-</sup> _C57 | SIN.LV.PGK.GFP | LIVER | 10 | 25551323  | - | NM_029881    | C030003D03Rik | - |
| DMM111  | Cdkn2a <sup>-/-</sup> _C57 | SIN.LV.PGK.GFP | LIVER | 10 | 26062009  | - | NM_172787    | L3mbt3        | - |
| DMM112L | Cdkn2a <sup>-/-</sup> _C57 | SIN.LV.PGK.GFP | LIVER | 10 | 29074560  | - | NM_001110196 | Rnf146        | - |
| DMM 112 | Cdkn2a <sup>-/-</sup> _C57 | SIN.LV.PGK.GFP | LIVER | 10 | 30250861  | + | NM_028604    | Trmt11        | - |
| DMM184  | Cdkn2a <sup>-/-</sup> _C57 | SIN.LV.PGK.GFP | LIVER | 10 | 30491480  | - | NM_172495    | Ncoa7         | - |
| DMM109  | Cdkn2a <sup>-/-</sup> _C57 | SIN.LV.PGK.GFP | LIVER | 10 | 31268897  | - | NM_001146349 | Rnf217        | - |
| DMM181  | Cdkn2a <sup>-/-</sup> _C57 | SIN.LV.PGK.GFP | LIVER | 10 | 36257537  | + | NM_001081208 | Hs3st5        | + |
| DMM182  | Cdkn2a <sup>-/-</sup> _C57 | SIN.LV.PGK.GFP | LIVER | 10 | 37913117  | + | NM_010681    | Lama4         | + |

|         |                            |                |       |    |           |   |              |               |   |
|---------|----------------------------|----------------|-------|----|-----------|---|--------------|---------------|---|
| DMM182  | Cdkn2a <sup>-/-</sup> _C57 | SIN.LV.PGK.GFP | LIVER | 10 | 39491712  | + | NM_011264    | Rev3l         | + |
| DMM 88  | Cdkn2a <sup>-/-</sup> _C57 | SIN.LV.PGK.GFP | LIVER | 10 | 40152788  | - | NM_198164    | Cdc2l6        | - |
| DMM101  | Cdkn2a <sup>-/-</sup> _C57 | SIN.LV.PGK.GFP | LIVER | 10 | 41252095  | + | NM_016898    | Cd164         | + |
| DMM112L | Cdkn2a <sup>-/-</sup> _C57 | SIN.LV.PGK.GFP | LIVER | 10 | 45359790  | + | NM_172473    | Hace1         | + |
| DMM105  | Cdkn2a <sup>-/-</sup> _C57 | SIN.LV.PGK.GFP | LIVER | 10 | 50422051  | + | NM_001146089 | Ascc3         | + |
| DMM 101 | Cdkn2a <sup>-/-</sup> _C57 | SIN.LV.PGK.GFP | LIVER | 10 | 51228920  | - | NM_013532    | Lilrb4        | + |
| DMM181  | Cdkn2a <sup>-/-</sup> _C57 | SIN.LV.PGK.GFP | LIVER | 10 | 51544225  | + | NM_001159389 | Rfx6          | + |
| DMM182  | Cdkn2a <sup>-/-</sup> _C57 | SIN.LV.PGK.GFP | LIVER | 10 | 52708606  | + | NM_178675    | Slc35f1       | + |
| DMM 101 | Cdkn2a <sup>-/-</sup> _C57 | SIN.LV.PGK.GFP | LIVER | 10 | 53821573  | - | NM_008548    | Man1a         | - |
| DMM 88  | Cdkn2a <sup>-/-</sup> _C57 | SIN.LV.PGK.GFP | LIVER | 10 | 58789051  | - | NM_011030    | P4ha1         | + |
| DMM183  | Cdkn2a <sup>-/-</sup> _C57 | SIN.LV.PGK.GFP | LIVER | 10 | 62480861  | - | NM_027425    | Rufy2         | + |
| DMM112L | Cdkn2a <sup>-/-</sup> _C57 | SIN.LV.PGK.GFP | LIVER | 10 | 68211032  | + | NM_177794    | Tmem26        | + |
| DMM182  | Cdkn2a <sup>-/-</sup> _C57 | SIN.LV.PGK.GFP | LIVER | 10 | 70038868  | - | NM_178621    | Phyhipl       | - |
| DMM181  | Cdkn2a <sup>-/-</sup> _C57 | SIN.LV.PGK.GFP | LIVER | 10 | 71417805  | - | NR_003644    | 1700049L16Rik | - |
| DMM101  | Cdkn2a <sup>-/-</sup> _C57 | SIN.LV.PGK.GFP | LIVER | 10 | 75380023  | - | NM_011418    | Smarcb1       | - |
| DMM112L | Cdkn2a <sup>-/-</sup> _C57 | SIN.LV.PGK.GFP | LIVER | 10 | 84115502  | + | NM_027423    | Polr3b        | + |
| DMM112L | Cdkn2a <sup>-/-</sup> _C57 | SIN.LV.PGK.GFP | LIVER | 10 | 87941566  | - | NM_144807    | Chpt1         | - |
| DMM 101 | Cdkn2a <sup>-/-</sup> _C57 | SIN.LV.PGK.GFP | LIVER | 10 | 89239869  | - | NM_029166    | Uhrf1bp1l     | + |
| DMM181  | Cdkn2a <sup>-/-</sup> _C57 | SIN.LV.PGK.GFP | LIVER | 10 | 90060012  | + | NM_001128086 | Anks1b        | + |
| DMM112L | Cdkn2a <sup>-/-</sup> _C57 | SIN.LV.PGK.GFP | LIVER | 10 | 98411642  | + | NM_026482    | Atp2b1        | + |
| DMM112L | Cdkn2a <sup>-/-</sup> _C57 | SIN.LV.PGK.GFP | LIVER | 10 | 105204254 | - | NM_207522    | BC067068      | - |
| DMM184  | Cdkn2a <sup>-/-</sup> _C57 | SIN.LV.PGK.GFP | LIVER | 10 | 106517378 | - | NM_001142804 | Acss3         | - |
| DMM111  | Cdkn2a <sup>-/-</sup> _C57 | SIN.LV.PGK.GFP | LIVER | 10 | 111510222 | + | NM_027018    | Glipr1l1      | + |
| DMM111  | Cdkn2a <sup>-/-</sup> _C57 | SIN.LV.PGK.GFP | LIVER | 10 | 111584243 | + | NM_178278    | Caps2         | + |
| DMM183  | Cdkn2a <sup>-/-</sup> _C57 | SIN.LV.PGK.GFP | LIVER | 10 | 114989714 | - | NM_010195    | Lgr5          | - |
| DMM 112 | Cdkn2a <sup>-/-</sup> _C57 | SIN.LV.PGK.GFP | LIVER | 10 | 122479405 | + | NM_153395    | Mon2          | - |
| DMM182  | Cdkn2a <sup>-/-</sup> _C57 | SIN.LV.PGK.GFP | LIVER | 10 | 122704686 | + | NM_182807    | Fam19a2       | + |
| DMM182  | Cdkn2a <sup>-/-</sup> _C57 | SIN.LV.PGK.GFP | LIVER | 10 | 123680488 | + | NM_182807    | Fam19a2       | + |
| DMM101  | Cdkn2a <sup>-/-</sup> _C57 | SIN.LV.PGK.GFP | LIVER | 10 | 125936428 | + | NM_026858    | Xrcc6bp1      | - |
| DMM182  | Cdkn2a <sup>-/-</sup> _C57 | SIN.LV.PGK.GFP | LIVER | 10 | 126868502 | + | NM_027900    | R3hdm2        | + |
| DMM182  | Cdkn2a <sup>-/-</sup> _C57 | SIN.LV.PGK.GFP | LIVER | 11 | 3047063   | - | NM_030207    | Sfil          | - |

|         |                            |                |       |    |           |   |              |         |   |
|---------|----------------------------|----------------|-------|----|-----------|---|--------------|---------|---|
| DMM 88  | Cdkn2a <sup>-/-</sup> _C57 | SIN.LV.PGK.GFP | LIVER | 11 | 3058718   | - | NM_030207    | Sfi1    | - |
| DMM172  | Cdkn2a <sup>-/-</sup> _C57 | SIN.LV.PGK.GFP | LIVER | 11 | 4993682   | - | NM_007968    | Ewsr1   | - |
| DMM184  | Cdkn2a <sup>-/-</sup> _C57 | SIN.LV.PGK.GFP | LIVER | 11 | 5216833   | - | NM_001080924 | Znrf3   | - |
| DMM 101 | Cdkn2a <sup>-/-</sup> _C57 | SIN.LV.PGK.GFP | LIVER | 11 | 16154231  | - | NM_145967    | Vstm2a  | + |
| DMM 101 | Cdkn2a <sup>-/-</sup> _C57 | SIN.LV.PGK.GFP | LIVER | 11 | 16748757  |   | NM_007912    | Egfr    | + |
| DMM 101 | Cdkn2a <sup>-/-</sup> _C57 | SIN.LV.PGK.GFP | LIVER | 11 | 20451549  | - | NM_021372    | Sertad2 | + |
| DMM 101 | Cdkn2a <sup>-/-</sup> _C57 | SIN.LV.PGK.GFP | LIVER | 11 | 21042927  | + | NM_023324    | Peli1   | + |
| DMM112L | Cdkn2a <sup>-/-</sup> _C57 | SIN.LV.PGK.GFP | LIVER | 11 | 21263756  | - | NM_139297    | Ugp2    | - |
| DMM 112 | Cdkn2a <sup>-/-</sup> _C57 | SIN.LV.PGK.GFP | LIVER | 11 | 31779271  | + | NM_026252    | Cpeb4   | + |
| DMM112L | Cdkn2a <sup>-/-</sup> _C57 | SIN.LV.PGK.GFP | LIVER | 11 | 36818642  | - | NM_011856    | Odz2    | - |
| DMM183  | Cdkn2a <sup>-/-</sup> _C57 | SIN.LV.PGK.GFP | LIVER | 11 | 38140597  | - | NM_011856    | Odz2    | - |
| DMM106  | Cdkn2a <sup>-/-</sup> _C57 | SIN.LV.PGK.GFP | LIVER | 11 | 40565228  | - | NM_009831    | Ccng1   | - |
| DMM185  | Cdkn2a <sup>-/-</sup> _C57 | SIN.LV.PGK.GFP | LIVER | 11 | 48806075  | - | NM_001145164 | Tgtp2   | - |
| DMM181  | Cdkn2a <sup>-/-</sup> _C57 | SIN.LV.PGK.GFP | LIVER | 11 | 49895722  | + | NM_021540    | Rnf130  | + |
| DMM183  | Cdkn2a <sup>-/-</sup> _C57 | SIN.LV.PGK.GFP | LIVER | 11 | 53191892  | + | NM_033565    | Aff4    | + |
| DMM182  | Cdkn2a <sup>-/-</sup> _C57 | SIN.LV.PGK.GFP | LIVER | 11 | 62176055  | - | NM_011308    | Ncor1   | - |
| DMM182  | Cdkn2a <sup>-/-</sup> _C57 | SIN.LV.PGK.GFP | LIVER | 11 | 77393615  | - | NM_144825    | Taok1   | - |
| DMM183  | Cdkn2a <sup>-/-</sup> _C57 | SIN.LV.PGK.GFP | LIVER | 11 | 79224398  | + | NM_010897    | Nf1     | + |
| DMM181  | Cdkn2a <sup>-/-</sup> _C57 | SIN.LV.PGK.GFP | LIVER | 11 | 83827644  | + | NM_001115009 | Aplgbp1 | + |
| DMM182  | Cdkn2a <sup>-/-</sup> _C57 | SIN.LV.PGK.GFP | LIVER | 11 | 89927053  | + | NM_026433    | Tmem100 | + |
| DMM 112 | Cdkn2a <sup>-/-</sup> _C57 | SIN.LV.PGK.GFP | LIVER | 11 | 90509180  | + | NM_028011    | Tom11   | - |
| DMM182  | Cdkn2a <sup>-/-</sup> _C57 | SIN.LV.PGK.GFP | LIVER | 11 | 97069935  | - | NM_008942    | Npepps  | - |
| DMM 88  | Cdkn2a <sup>-/-</sup> _C57 | SIN.LV.PGK.GFP | LIVER | 11 | 98673651  | - | NM_138660    | Casc3   | + |
| DMM182  | Cdkn2a <sup>-/-</sup> _C57 | SIN.LV.PGK.GFP | LIVER | 11 | 101388065 | - | NM_009764    | Bra1    | - |
| DMM182  | Cdkn2a <sup>-/-</sup> _C57 | SIN.LV.PGK.GFP | LIVER | 11 | 102415561 | - | NM_001159492 | Gpatch8 | - |
| DMM172  | Cdkn2a <sup>-/-</sup> _C57 | SIN.LV.PGK.GFP | LIVER | 11 | 103806998 | - | NM_008740    | Nsf     | - |
| DMM 112 | Cdkn2a <sup>-/-</sup> _C57 | SIN.LV.PGK.GFP | LIVER | 11 | 105031604 | + | NM_001112705 | Tlk2    | + |
| DMM112L | Cdkn2a <sup>-/-</sup> _C57 | SIN.LV.PGK.GFP | LIVER | 11 | 105135954 | + | NM_001112705 | Tlk2    | + |
| DMM 112 | Cdkn2a <sup>-/-</sup> _C57 | SIN.LV.PGK.GFP | LIVER | 11 | 109530481 | + | NM_021880    | Prkar1a | + |
| DMM 101 | Cdkn2a <sup>-/-</sup> _C57 | SIN.LV.PGK.GFP | LIVER | 11 | 110772039 | - | NM_010604    | Kcnj16  | + |
| DMM183  | Cdkn2a <sup>-/-</sup> _C57 | SIN.LV.PGK.GFP | LIVER | 11 | 111582798 | + | NM_008425    | Kcnj2   | + |

|         |                            |                |       |    |           |   |              |               |   |
|---------|----------------------------|----------------|-------|----|-----------|---|--------------|---------------|---|
| DMM181  | Cdkn2a <sup>-/-</sup> _C57 | SIN.LV.PGK.GFP | LIVER | 11 | 111694396 | + | NM_008425    | Kcnj2         | + |
| DMM181  | Cdkn2a <sup>-/-</sup> _C57 | SIN.LV.PGK.GFP | LIVER | 11 | 111989639 | - | NR_024085    | BC006965      | - |
| DMM182  | Cdkn2a <sup>-/-</sup> _C57 | SIN.LV.PGK.GFP | LIVER | 11 | 112227400 | - | NR_024085    | BC006965      | - |
| DMM182  | Cdkn2a <sup>-/-</sup> _C57 | SIN.LV.PGK.GFP | LIVER | 12 | 3282565   | - | NM_016676    | Rab10         | - |
| DMM111  | Cdkn2a <sup>-/-</sup> _C57 | SIN.LV.PGK.GFP | LIVER | 12 | 8218842   | + | NM_172401    | 1110057K04Rik | + |
| DMM111  | Cdkn2a <sup>-/-</sup> _C57 | SIN.LV.PGK.GFP | LIVER | 12 | 8218904   | + | NM_172401    | 1110057K04Rik | + |
| DMM 88  | Cdkn2a <sup>-/-</sup> _C57 | SIN.LV.PGK.GFP | LIVER | 12 | 8522306   | - | NM_177802    | Slc7a15       | - |
| DMM 112 | Cdkn2a <sup>-/-</sup> _C57 | SIN.LV.PGK.GFP | LIVER | 12 | 8936534   | - | NM_008640    | Laptn4a       | + |
| DMM182  | Cdkn2a <sup>-/-</sup> _C57 | SIN.LV.PGK.GFP | LIVER | 12 | 11264047  | - | NM_177331    | Gen1          | - |
| DMM106  | Cdkn2a <sup>-/-</sup> _C57 | SIN.LV.PGK.GFP | LIVER | 12 | 16594945  | - | NM_001130412 | Lpin1         | - |
| DMM182  | Cdkn2a <sup>-/-</sup> _C57 | SIN.LV.PGK.GFP | LIVER | 12 | 21260483  | + | NM_001135192 | Ddef2         | + |
| DMM181  | Cdkn2a <sup>-/-</sup> _C57 | SIN.LV.PGK.GFP | LIVER | 12 | 31541827  | + | NM_001159743 | Fam150b       | + |
| DMM 88  | Cdkn2a <sup>-/-</sup> _C57 | SIN.LV.PGK.GFP | LIVER | 12 | 35577661  | + | NM_029294    | Prps111       | + |
| DMM 112 | Cdkn2a <sup>-/-</sup> _C57 | SIN.LV.PGK.GFP | LIVER | 12 | 35816319  | - | NM_001014973 | Snx13         | + |
| DMM 112 | Cdkn2a <sup>-/-</sup> _C57 | SIN.LV.PGK.GFP | LIVER | 12 | 38190588  |   | NM_178767    | Tmem195       | + |
| DMM184  | Cdkn2a <sup>-/-</sup> _C57 | SIN.LV.PGK.GFP | LIVER | 12 | 39095193  | + | NM_178681    | Dgkb          | + |
| DMM182  | Cdkn2a <sup>-/-</sup> _C57 | SIN.LV.PGK.GFP | LIVER | 12 | 40552150  | - | NM_001039515 | Arl4a         | - |
| DMM183  | Cdkn2a <sup>-/-</sup> _C57 | SIN.LV.PGK.GFP | LIVER | 12 | 43218237  | + | NM_053122    | Immp2l        | + |
| DMM112L | Cdkn2a <sup>-/-</sup> _C57 | SIN.LV.PGK.GFP | LIVER | 12 | 45297544  | - | NM_013760    | Dnajb9        | - |
| DMM 101 | Cdkn2a <sup>-/-</sup> _C57 | SIN.LV.PGK.GFP | LIVER | 12 | 45400124  | - | NM_026164    | Pnpla8        | + |
| DMM181  | Cdkn2a <sup>-/-</sup> _C57 | SIN.LV.PGK.GFP | LIVER | 12 | 47429472  | - | NM_144552    | Stxbp6        | - |
| DMM112L | Cdkn2a <sup>-/-</sup> _C57 | SIN.LV.PGK.GFP | LIVER | 12 | 47969967  | - | NM_144552    | Stxbp6        | - |
| DMM 104 | Cdkn2a <sup>-/-</sup> _C57 | SIN.LV.PGK.GFP | LIVER | 12 | 59165658  | + | NM_009216    | Sstr1         | + |
| DMM184  | Cdkn2a <sup>-/-</sup> _C57 | SIN.LV.PGK.GFP | LIVER | 12 | 65210442  | + | NM_001025605 | Gm527         | + |
| DMM 101 | Cdkn2a <sup>-/-</sup> _C57 | SIN.LV.PGK.GFP | LIVER | 12 | 66044510  | - | NM_025707    | Klhl28        | - |
| DMM 101 | Cdkn2a <sup>-/-</sup> _C57 | SIN.LV.PGK.GFP | LIVER | 12 | 66156558  | + | NM_177806    | Prpf39        | - |
| DMM103  | Cdkn2a <sup>-/-</sup> _C57 | SIN.LV.PGK.GFP | LIVER | 12 | 68160395  | - | NM_207010    | Mdga2         | - |
| DMM101  | Cdkn2a <sup>-/-</sup> _C57 | SIN.LV.PGK.GFP | LIVER | 12 | 71579146  | + | NM_028339    | Tmx1          | + |
| DMM112L | Cdkn2a <sup>-/-</sup> _C57 | SIN.LV.PGK.GFP | LIVER | 12 | 74319519  | + | NM_008612    | Mnat1         | + |
| DMM112L | Cdkn2a <sup>-/-</sup> _C57 | SIN.LV.PGK.GFP | LIVER | 12 | 74419295  | + | NM_029580    | Trmt5         | - |
| DMM182  | Cdkn2a <sup>-/-</sup> _C57 | SIN.LV.PGK.GFP | LIVER | 12 | 77000950  | + | NM_001005510 | Syne2         | + |

|         |                            |                |       |    |           |   |              |               |   |
|---------|----------------------------|----------------|-------|----|-----------|---|--------------|---------------|---|
| DMM182  | Cdkn2a <sup>-/-</sup> _C57 | SIN.LV.PGK.GFP | LIVER | 12 | 77045975  | + | NM_001005510 | Syne2         | + |
| DMM185  | Cdkn2a <sup>-/-</sup> _C57 | SIN.LV.PGK.GFP | LIVER | 12 | 82038809  | - | NM_001079694 | Sfrs5         | + |
| DMM 101 | Cdkn2a <sup>-/-</sup> _C57 | SIN.LV.PGK.GFP | LIVER | 12 | 84996549  | + | NM_027349    | Rbm25         | + |
| DMM 101 | Cdkn2a <sup>-/-</sup> _C57 | SIN.LV.PGK.GFP | LIVER | 12 | 89711507  | - | NM_028105    | Adck1         | + |
| DMM 88  | Cdkn2a <sup>-/-</sup> _C57 | SIN.LV.PGK.GFP | LIVER | 12 | 92545400  | + | NM_181815    | 4930534B04Rik | - |
| DMM182  | Cdkn2a <sup>-/-</sup> _C57 | SIN.LV.PGK.GFP | LIVER | 12 | 93862863  | - | NM_001039089 | Sell1         | - |
| DMM182  | Cdkn2a <sup>-/-</sup> _C57 | SIN.LV.PGK.GFP | LIVER | 12 | 95559976  | + | NM_201518    | Flrt2         | + |
| DMM 101 | Cdkn2a <sup>-/-</sup> _C57 | SIN.LV.PGK.GFP | LIVER | 12 | 95738748  | + | NM_201518    | Flrt2         | + |
| DMM182  | Cdkn2a <sup>-/-</sup> _C57 | SIN.LV.PGK.GFP | LIVER | 12 | 99451292  | - | NM_008079    | Galc          | - |
| DMM181  | Cdkn2a <sup>-/-</sup> _C57 | SIN.LV.PGK.GFP | LIVER | 12 | 99451368  | - | NM_008079    | Galc          | - |
| DMM182  | Cdkn2a <sup>-/-</sup> _C57 | SIN.LV.PGK.GFP | LIVER | 12 | 99452674  | - | NM_008079    | Galc          | - |
| DMM182  | Cdkn2a <sup>-/-</sup> _C57 | SIN.LV.PGK.GFP | LIVER | 12 | 99480949  | - | NM_008079    | Galc          | - |
| DMM113  | Cdkn2a <sup>-/-</sup> _C57 | SIN.LV.PGK.GFP | LIVER | 12 | 104659955 | - | NM_001159502 | Ddx24         | - |
| DMM106  | Cdkn2a <sup>-/-</sup> _C57 | SIN.LV.PGK.GFP | LIVER | 12 | 112823920 | + | NM_021516    | Mark3         | + |
| DMM181  | Cdkn2a <sup>-/-</sup> _C57 | SIN.LV.PGK.GFP | LIVER | 12 | 118679283 | + | NM_175930    | Rapgef5       | + |
| DMM113  | Cdkn2a <sup>-/-</sup> _C57 | SIN.LV.PGK.GFP | LIVER | 12 | 119091661 | + | NM_146040    | Cdca7l        | + |
| DMM 88  | Cdkn2a <sup>-/-</sup> _C57 | SIN.LV.PGK.GFP | LIVER | 12 | 120614180 | - | NM_177290    | Itgb8         | - |
| DMM112L | Cdkn2a <sup>-/-</sup> _C57 | SIN.LV.PGK.GFP | LIVER | 13 | 5311489   | + | NM_011803    | Klf6          | + |
| DMM183  | Cdkn2a <sup>-/-</sup> _C57 | SIN.LV.PGK.GFP | LIVER | 13 | 6532391   | + | NM_145131    | Pitrm1        | + |
| DMM 88  | Cdkn2a <sup>-/-</sup> _C57 | SIN.LV.PGK.GFP | LIVER | 13 | 29722941  | + | NM_144536    | Cdkal1        | - |
| DMM105  | Cdkn2a <sup>-/-</sup> _C57 | SIN.LV.PGK.GFP | LIVER | 13 | 31029261  | - | NM_025588    | Exoc2         | - |
| DMM 112 | Cdkn2a <sup>-/-</sup> _C57 | SIN.LV.PGK.GFP | LIVER | 13 | 32903683  | + | NM_030215    | Wrnip1        | + |
| DMM103  | Cdkn2a <sup>-/-</sup> _C57 | SIN.LV.PGK.GFP | LIVER | 13 | 33023661  | - | NM_173051    | Serpinb1c     | - |
| DMM 112 | Cdkn2a <sup>-/-</sup> _C57 | SIN.LV.PGK.GFP | LIVER | 13 | 34018467  | - | NM_009254    | Serpinb6a     | + |
| DMM112L | Cdkn2a <sup>-/-</sup> _C57 | SIN.LV.PGK.GFP | LIVER | 13 | 46147135  | - | NM_009124    | Atxn1         | - |
| DMM181  | Cdkn2a <sup>-/-</sup> _C57 | SIN.LV.PGK.GFP | LIVER | 13 | 47341954  | + | NM_146042    | Rnf144b       | + |
| DMM109  | Cdkn2a <sup>-/-</sup> _C57 | SIN.LV.PGK.GFP | LIVER | 13 | 51216340  | + | NM_146043    | Spin1         | + |
| DMM 101 | Cdkn2a <sup>-/-</sup> _C57 | SIN.LV.PGK.GFP | LIVER | 13 | 52691704  | + | NM_011518    | Syk           | + |
| DMM106  | Cdkn2a <sup>-/-</sup> _C57 | SIN.LV.PGK.GFP | LIVER | 13 | 60461205  | - | NM_008086    | Gas1          | - |
| DMM 88  | Cdkn2a <sup>-/-</sup> _C57 | SIN.LV.PGK.GFP | LIVER | 13 | 67043474  | + | NM_008959    | Ptdss1        | + |
| DMM184  | Cdkn2a <sup>-/-</sup> _C57 | SIN.LV.PGK.GFP | LIVER | 13 | 67083169  | + | NM_008959    | Ptdss1        | + |

|         |                            |                |       |    |           |   |              |               |   |
|---------|----------------------------|----------------|-------|----|-----------|---|--------------|---------------|---|
| DMM112L | Cdkn2a <sup>-/-</sup> _C57 | SIN.LV.PGK.GFP | LIVER | 13 | 67717304  | - | NM_183146    | A530054K11Rik | - |
| DMM 88  | Cdkn2a <sup>-/-</sup> _C57 | SIN.LV.PGK.GFP | LIVER | 13 | 70791550  | + | NM_172053    | Adams16       | - |
| DMM112L | Cdkn2a <sup>-/-</sup> _C57 | SIN.LV.PGK.GFP | LIVER | 13 | 76284744  | + | NM_001081352 | Ttc37         | + |
| DMM184  | Cdkn2a <sup>-/-</sup> _C57 | SIN.LV.PGK.GFP | LIVER | 13 | 77856603  | + | NM_001145676 | 2210408I21Rik | + |
| DMM 88  | Cdkn2a <sup>-/-</sup> _C57 | SIN.LV.PGK.GFP | LIVER | 13 | 81031110  | - | NM_001042591 | Arrdc3        | + |
| DMM106  | Cdkn2a <sup>-/-</sup> _C57 | SIN.LV.PGK.GFP | LIVER | 13 | 81832018  | - | NM_001081176 | Polr3g        | - |
| DMM 101 | Cdkn2a <sup>-/-</sup> _C57 | SIN.LV.PGK.GFP | LIVER | 13 | 82651899  | + | NM_007684    | Cetn3         | + |
| DMM114  | Cdkn2a <sup>-/-</sup> _C57 | SIN.LV.PGK.GFP | LIVER | 13 | 83028784  | + | NM_025282    | Mef2c         | + |
| DMM182  | Cdkn2a <sup>-/-</sup> _C57 | SIN.LV.PGK.GFP | LIVER | 13 | 83513875  | + | NM_025282    | Mef2c         | + |
| DMM105  | Cdkn2a <sup>-/-</sup> _C57 | SIN.LV.PGK.GFP | LIVER | 13 | 84428127  | + | NM_175187    | Tmem161b      | + |
| DMM101  | Cdkn2a <sup>-/-</sup> _C57 | SIN.LV.PGK.GFP | LIVER | 13 | 85370098  | - | NM_145452    | Rasa1         | - |
| DMM101  | Cdkn2a <sup>-/-</sup> _C57 | SIN.LV.PGK.GFP | LIVER | 13 | 85371436  | - | NM_145452    | Rasa1         | - |
| DMM184  | Cdkn2a <sup>-/-</sup> _C57 | SIN.LV.PGK.GFP | LIVER | 13 | 85377861  | - | NM_145452    | Rasa1         | - |
| DMM109  | Cdkn2a <sup>-/-</sup> _C57 | SIN.LV.PGK.GFP | LIVER | 13 | 85396028  | - | NM_145452    | Rasa1         | - |
| DMM 101 | Cdkn2a <sup>-/-</sup> _C57 | SIN.LV.PGK.GFP | LIVER | 13 | 85396067  | - | NM_145452    | Rasa1         | - |
| DMM 112 | Cdkn2a <sup>-/-</sup> _C57 | SIN.LV.PGK.GFP | LIVER | 13 | 91105643  | - | NM_025770    | Atg10         | - |
| DMM 112 | Cdkn2a <sup>-/-</sup> _C57 | SIN.LV.PGK.GFP | LIVER | 13 | 91838876  | - | NM_024186    | Ssbp2         | + |
| DMM 88  | Cdkn2a <sup>-/-</sup> _C57 | SIN.LV.PGK.GFP | LIVER | 13 | 102596724 | - | NM_001077495 | Pik3r1        | - |
| DMM101  | Cdkn2a <sup>-/-</sup> _C57 | SIN.LV.PGK.GFP | LIVER | 13 | 102832940 | + | NM_001077495 | Pik3r1        | - |
| DMM105  | Cdkn2a <sup>-/-</sup> _C57 | SIN.LV.PGK.GFP | LIVER | 13 | 104837544 | - | NM_029447    | Nln           | - |
| DMM 101 | Cdkn2a <sup>-/-</sup> _C57 | SIN.LV.PGK.GFP | LIVER | 13 | 105014278 |   | NM_172807    | Ppwd1         | - |
| DMM183  | Cdkn2a <sup>-/-</sup> _C57 | SIN.LV.PGK.GFP | LIVER | 13 | 110056228 | + | NM_011056    | Pde4d         | + |
| DMM182  | Cdkn2a <sup>-/-</sup> _C57 | SIN.LV.PGK.GFP | LIVER | 13 | 111776932 | + | NM_175497    | Actbl2        | + |
| DMM 112 | Cdkn2a <sup>-/-</sup> _C57 | SIN.LV.PGK.GFP | LIVER | 13 | 114732866 | + | NM_172595    | Arl15         | + |
| DMM104  | Cdkn2a <sup>-/-</sup> _C57 | SIN.LV.PGK.GFP | LIVER | 13 | 114829888 | + | NM_172595    | Arl15         | + |
| DMM104  | Cdkn2a <sup>-/-</sup> _C57 | SIN.LV.PGK.GFP | LIVER | 13 | 119207937 | - | NM_021556    | Mrps30        | - |
| DMM184  | Cdkn2a <sup>-/-</sup> _C57 | SIN.LV.PGK.GFP | LIVER | 13 | 119214389 | - | NM_021556    | Mrps30        | - |
| DMM112L | Cdkn2a <sup>-/-</sup> _C57 | SIN.LV.PGK.GFP | LIVER | 13 | 120169553 | - | NM_008710    | Nnt           | - |
| DMM 112 | Cdkn2a <sup>-/-</sup> _C57 | SIN.LV.PGK.GFP | LIVER | 14 | 8677145   | + | NM_134080    | Flnb          | + |
| DMM 101 | Cdkn2a <sup>-/-</sup> _C57 | SIN.LV.PGK.GFP | LIVER | 14 | 10279788  | - | NM_010210    | Fhit          | - |
| DMM184  | Cdkn2a <sup>-/-</sup> _C57 | SIN.LV.PGK.GFP | LIVER | 14 | 12200391  | + | NM_008981    | Ptprg         | + |

|         |                            |                |       |    |           |   |              |               |   |
|---------|----------------------------|----------------|-------|----|-----------|---|--------------|---------------|---|
| DMM184  | Cdkn2a <sup>-/-</sup> _C57 | SIN.LV.PGK.GFP | LIVER | 14 | 13625540  | - | NM_001042617 | Cadps         | - |
| DMM112L | Cdkn2a <sup>-/-</sup> _C57 | SIN.LV.PGK.GFP | LIVER | 14 | 17377186  | - | NM_011243    | Rarb          | - |
| DMM 112 | Cdkn2a <sup>-/-</sup> _C57 | SIN.LV.PGK.GFP | LIVER | 14 | 18695899  | - | NM_001113417 | Thrb          | + |
| DMM105  | Cdkn2a <sup>-/-</sup> _C57 | SIN.LV.PGK.GFP | LIVER | 14 | 31218182  | - | NM_028981    | Cacna1d       | - |
| DMM103  | Cdkn2a <sup>-/-</sup> _C57 | SIN.LV.PGK.GFP | LIVER | 14 | 34197029  | - | NM_016700    | Mapk8         | - |
| DMM181  | Cdkn2a <sup>-/-</sup> _C57 | SIN.LV.PGK.GFP | LIVER | 14 | 35514585  | + | NM_001004436 | Wapal         | + |
| DMM104  | Cdkn2a <sup>-/-</sup> _C57 | SIN.LV.PGK.GFP | LIVER | 14 | 39915387  | - | NM_008734    | Nrg3          | - |
| DMM184  | Cdkn2a <sup>-/-</sup> _C57 | SIN.LV.PGK.GFP | LIVER | 14 | 45850981  | + | NM_027518    | Gpr137c       | + |
| DMM112L | Cdkn2a <sup>-/-</sup> _C57 | SIN.LV.PGK.GFP | LIVER | 14 | 48291313  | + | NM_008477    | Ktn1          | + |
| DMM111  | Cdkn2a <sup>-/-</sup> _C57 | SIN.LV.PGK.GFP | LIVER | 14 | 48340823  | + | NM_008477    | Ktn1          | + |
| DMM101  | Cdkn2a <sup>-/-</sup> _C57 | SIN.LV.PGK.GFP | LIVER | 14 | 49671512  | - | NM_207214    | Exoc5         | - |
| DMM101  | Cdkn2a <sup>-/-</sup> _C57 | SIN.LV.PGK.GFP | LIVER | 14 | 51539075  | - | NM_133676    | Osgep         | - |
| DMM182  | Cdkn2a <sup>-/-</sup> _C57 | SIN.LV.PGK.GFP | LIVER | 14 | 55652894  | + | NM_026890    | Ngdn          | + |
| DMM113  | Cdkn2a <sup>-/-</sup> _C57 | SIN.LV.PGK.GFP | LIVER | 14 | 60047375  | - | NM_001081024 | Setdb2        | - |
| DMM182  | Cdkn2a <sup>-/-</sup> _C57 | SIN.LV.PGK.GFP | LIVER | 14 | 60903985  | + | NM_144843    | Mtmr6         | + |
| DMM182  | Cdkn2a <sup>-/-</sup> _C57 | SIN.LV.PGK.GFP | LIVER | 14 | 60904074  | + | NM_144843    | Mtmr6         | + |
| DMM182  | Cdkn2a <sup>-/-</sup> _C57 | SIN.LV.PGK.GFP | LIVER | 14 | 60904327  | + | NM_144843    | Mtmr6         | + |
| DMM 101 | Cdkn2a <sup>-/-</sup> _C57 | SIN.LV.PGK.GFP | LIVER | 14 | 61455738  | - | NM_027436    | Mipep         | + |
| DMM182  | Cdkn2a <sup>-/-</sup> _C57 | SIN.LV.PGK.GFP | LIVER | 14 | 65343861  | + | NM_001081177 | Kif13b        | + |
| DMM 112 | Cdkn2a <sup>-/-</sup> _C57 | SIN.LV.PGK.GFP | LIVER | 14 | 65469411  | - | NM_177338    | Hmbox1        | - |
| DMM 101 | Cdkn2a <sup>-/-</sup> _C57 | SIN.LV.PGK.GFP | LIVER | 14 | 66459552  | - | NM_145944    | Ccdc25        | + |
| DMM 112 | Cdkn2a <sup>-/-</sup> _C57 | SIN.LV.PGK.GFP | LIVER | 14 | 75208017  | - | NM_001033439 | Lrch1         | - |
| DMM181  | Cdkn2a <sup>-/-</sup> _C57 | SIN.LV.PGK.GFP | LIVER | 14 | 80027908  | + | NM_026474    | Sugt1         | + |
| DMM 101 | Cdkn2a <sup>-/-</sup> _C57 | SIN.LV.PGK.GFP | LIVER | 14 | 87856279  | + | NM_172605    | Tdrd3         | + |
| DMM112L | Cdkn2a <sup>-/-</sup> _C57 | SIN.LV.PGK.GFP | LIVER | 14 | 98815216  | - | NM_001038610 | Dach1         | - |
| DMM 101 | Cdkn2a <sup>-/-</sup> _C57 | SIN.LV.PGK.GFP | LIVER | 14 | 99233179  | + | NM_175245    | 2410129H14Rik | - |
| DMM101  | Cdkn2a <sup>-/-</sup> _C57 | SIN.LV.PGK.GFP | LIVER | 14 | 102078290 | + | NM_016723    | Uchl3         | + |
| DMM101  | Cdkn2a <sup>-/-</sup> _C57 | SIN.LV.PGK.GFP | LIVER | 14 | 102920516 | - | NM_177715    | Kctd12        | - |
| DMM182  | Cdkn2a <sup>-/-</sup> _C57 | SIN.LV.PGK.GFP | LIVER | 14 | 103127460 | - | NM_177715    | Kctd12        | - |
| DMM112L | Cdkn2a <sup>-/-</sup> _C57 | SIN.LV.PGK.GFP | LIVER | 14 | 103369685 | - | NM_177715    | Kctd12        | - |
| DMM185  | Cdkn2a <sup>-/-</sup> _C57 | SIN.LV.PGK.GFP | LIVER | 14 | 108211046 | - | NM_199065    | Slitrk1       | - |



|         |                            |                |       |    |           |   |              |         |   |
|---------|----------------------------|----------------|-------|----|-----------|---|--------------|---------|---|
| DMM 88  | Cdkn2a <sup>-/-</sup> _C57 | SIN.LV.PGK.GFP | LIVER | 14 | 109888676 |   | NM_199065    | Slitrk1 | - |
| DMM101  | Cdkn2a <sup>-/-</sup> _C57 | SIN.LV.PGK.GFP | LIVER | 14 | 118101043 | + | NM_001079844 | Gpc6    | + |
| DMM 88  | Cdkn2a <sup>-/-</sup> _C57 | SIN.LV.PGK.GFP | LIVER | 14 | 118962798 | + | NM_001033336 | Abcc4   | - |
| DMM101  | Cdkn2a <sup>-/-</sup> _C57 | SIN.LV.PGK.GFP | LIVER | 14 | 119050053 | - | NM_001033336 | Abcc4   | - |
| DMM 112 | Cdkn2a <sup>-/-</sup> _C57 | SIN.LV.PGK.GFP | LIVER | 14 | 119364646 | + | NM_008929    | Dnajc3  | + |
| DMM112L | Cdkn2a <sup>-/-</sup> _C57 | SIN.LV.PGK.GFP | LIVER | 14 | 120830564 | + | NM_175341    | Mbnl2   | + |
| DMM 112 | Cdkn2a <sup>-/-</sup> _C57 | SIN.LV.PGK.GFP | LIVER | 14 | 123049221 |   | NM_144844    | Pcca    | + |
| DMM184  | Cdkn2a <sup>-/-</sup> _C57 | SIN.LV.PGK.GFP | LIVER | 15 | 4060747   | + | NM_024188    | Oxct1   | + |
| DMM182  | Cdkn2a <sup>-/-</sup> _C57 | SIN.LV.PGK.GFP | LIVER | 15 | 5168623   | + | NM_026213    | Ttc33   | + |
| DMM182  | Cdkn2a <sup>-/-</sup> _C57 | SIN.LV.PGK.GFP | LIVER | 15 | 8256973   | - | NM_201232    | Nipbl   | - |
| DMM182  | Cdkn2a <sup>-/-</sup> _C57 | SIN.LV.PGK.GFP | LIVER | 15 | 8358409   | - | NM_027707    | Nipbl   | - |
| DMM 112 | Cdkn2a <sup>-/-</sup> _C57 | SIN.LV.PGK.GFP | LIVER | 15 | 12255771  | + | NM_025673    | Golph3  | + |
| DMM104  | Cdkn2a <sup>-/-</sup> _C57 | SIN.LV.PGK.GFP | LIVER | 15 | 12961624  | - | NM_007666    | Cdh6    | - |
| DMM103  | Cdkn2a <sup>-/-</sup> _C57 | SIN.LV.PGK.GFP | LIVER | 15 | 17525757  | - | NM_009869    | Cdh9    | + |
| DMM112L | Cdkn2a <sup>-/-</sup> _C57 | SIN.LV.PGK.GFP | LIVER | 15 | 17657536  | - | NM_009869    | Cdh9    | + |
| DMM101  | Cdkn2a <sup>-/-</sup> _C57 | SIN.LV.PGK.GFP | LIVER | 15 | 19769777  | + | NM_022816    | Acot10  | - |
| DMM 101 | Cdkn2a <sup>-/-</sup> _C57 | SIN.LV.PGK.GFP | LIVER | 15 | 19799808  | - | NM_022816    | Acot10  | - |
| DMM111  | Cdkn2a <sup>-/-</sup> _C57 | SIN.LV.PGK.GFP | LIVER | 15 | 19804717  | + | NM_022816    | Acot10  | - |
| DMM183  | Cdkn2a <sup>-/-</sup> _C57 | SIN.LV.PGK.GFP | LIVER | 15 | 33468795  | + | NM_018755    | Pgep    | + |
| DMM 101 | Cdkn2a <sup>-/-</sup> _C57 | SIN.LV.PGK.GFP | LIVER | 15 | 34456247  |   | NM_026340    | Pop1    | + |
| DMM 101 | Cdkn2a <sup>-/-</sup> _C57 | SIN.LV.PGK.GFP | LIVER | 15 | 36615099  | - | NM_008774    | Pabpc1  | - |
| DMM101  | Cdkn2a <sup>-/-</sup> _C57 | SIN.LV.PGK.GFP | LIVER | 15 | 37914353  | - | NM_001081359 | Ubr5    | - |
| DMM 88  | Cdkn2a <sup>-/-</sup> _C57 | SIN.LV.PGK.GFP | LIVER | 15 | 41634176  | + | NM_001130163 | Oxr1    | + |
| DMM 88  | Cdkn2a <sup>-/-</sup> _C57 | SIN.LV.PGK.GFP | LIVER | 15 | 41634227  | - | NM_001130163 | Oxr1    | + |
| DMM181  | Cdkn2a <sup>-/-</sup> _C57 | SIN.LV.PGK.GFP | LIVER | 15 | 41686971  | + | NM_001130163 | Oxr1    | + |
| DMM109  | Cdkn2a <sup>-/-</sup> _C57 | SIN.LV.PGK.GFP | LIVER | 15 | 43099188  | - | NM_008388    | Eif3e   | - |
| DMM 101 | Cdkn2a <sup>-/-</sup> _C57 | SIN.LV.PGK.GFP | LIVER | 15 | 43360995  | + | NM_025736    | Ttc35   | + |
| DMM109  | Cdkn2a <sup>-/-</sup> _C57 | SIN.LV.PGK.GFP | LIVER | 15 | 49800454  | - | NM_032000    | Trps1   | - |
| DMM183  | Cdkn2a <sup>-/-</sup> _C57 | SIN.LV.PGK.GFP | LIVER | 15 | 50803197  | - | NM_032000    | Trps1   | - |
| DMM 112 | Cdkn2a <sup>-/-</sup> _C57 | SIN.LV.PGK.GFP | LIVER | 15 | 54274206  | - | NM_173422    | Colec10 | + |
| DMM 88  | Cdkn2a <sup>-/-</sup> _C57 | SIN.LV.PGK.GFP | LIVER | 15 | 54849329  | - | NM_001081288 | Taf2    | - |

|          |                            |                |       |    |          |   |              |               |   |
|----------|----------------------------|----------------|-------|----|----------|---|--------------|---------------|---|
| DMM182   | Cdkn2a <sup>-/-</sup> _C57 | SIN.LV.PGK.GFP | LIVER | 15 | 55618348 | - | NM_016667    | Sntb1         | - |
| DMM181   | Cdkn2a <sup>-/-</sup> _C57 | SIN.LV.PGK.GFP | LIVER | 15 | 62537764 | + | NR_003368    | Pvt1          | + |
| DMM182   | Cdkn2a <sup>-/-</sup> _C57 | SIN.LV.PGK.GFP | LIVER | 15 | 76323222 | + | NM_008296    | Hsf1          | + |
| DMM181   | Cdkn2a <sup>-/-</sup> _C57 | SIN.LV.PGK.GFP | LIVER | 15 | 76956260 | - | NM_001110828 | Rbm9          | - |
| DMM182   | Cdkn2a <sup>-/-</sup> _C57 | SIN.LV.PGK.GFP | LIVER | 15 | 81471481 | + | NM_177821    | Ep300         | + |
| DMM182   | Cdkn2a <sup>-/-</sup> _C57 | SIN.LV.PGK.GFP | LIVER | 15 | 85236995 | + | NM_016843    | Atxn10        | + |
| DMM 112  | Cdkn2a <sup>-/-</sup> _C57 | SIN.LV.PGK.GFP | LIVER | 15 | 91512747 |   | NM_025730    | Lrrk2         | + |
| DMM112L  | Cdkn2a <sup>-/-</sup> _C57 | SIN.LV.PGK.GFP | LIVER | 15 | 93085562 | - | NM_001033275 | Glt8d3        | - |
| DMM181   | Cdkn2a <sup>-/-</sup> _C57 | SIN.LV.PGK.GFP | LIVER | 15 | 93256348 | + | NM_001083114 | Pphln1        | + |
| DMM 101  | Cdkn2a <sup>-/-</sup> _C57 | SIN.LV.PGK.GFP | LIVER | 15 | 93392741 | + | NM_001033217 | Prickle1      | - |
| DMM181   | Cdkn2a <sup>-/-</sup> _C57 | SIN.LV.PGK.GFP | LIVER | 16 | 10673351 | + | NM_177562    | Clec16a       | + |
| DMM112L  | Cdkn2a <sup>-/-</sup> _C57 | SIN.LV.PGK.GFP | LIVER | 16 | 12483703 | + | NM_028277    | 2700045P11Rik | + |
| DMM 112  | Cdkn2a <sup>-/-</sup> _C57 | SIN.LV.PGK.GFP | LIVER | 16 | 12495733 | - | NM_028277    | 2700045P11Rik | + |
| DMM112L  | Cdkn2a <sup>-/-</sup> _C57 | SIN.LV.PGK.GFP | LIVER | 16 | 14373947 | + | NM_008576    | Abcc1         | + |
| DMM101   | Cdkn2a <sup>-/-</sup> _C57 | SIN.LV.PGK.GFP | LIVER | 16 | 18954603 | + | NM_010435    | Hira          | + |
| DMM182   | Cdkn2a <sup>-/-</sup> _C57 | SIN.LV.PGK.GFP | LIVER | 16 | 25743761 | + | NM_001127259 | Trp63         | + |
| DMM112L  | Cdkn2a <sup>-/-</sup> _C57 | SIN.LV.PGK.GFP | LIVER | 16 | 26929053 | - | NM_001013761 | Gm606         | - |
| DMM181   | Cdkn2a <sup>-/-</sup> _C57 | SIN.LV.PGK.GFP | LIVER | 16 | 27303241 | + | NM_198112    | Ostn          | + |
| DMM184   | Cdkn2a <sup>-/-</sup> _C57 | SIN.LV.PGK.GFP | LIVER | 16 | 27353448 | - | NM_198166    | Uts2d         | - |
| DMM181   | Cdkn2a <sup>-/-</sup> _C57 | SIN.LV.PGK.GFP | LIVER | 16 | 30330723 | - | NM_001128094 | Atp13a3       | - |
| DMM182   | Cdkn2a <sup>-/-</sup> _C57 | SIN.LV.PGK.GFP | LIVER | 16 | 30332799 | - | NM_001128094 | Atp13a3       | - |
| DMM 101  | Cdkn2a <sup>-/-</sup> _C57 | SIN.LV.PGK.GFP | LIVER | 16 | 37074662 | + | NM_001159369 | Polq          | + |
| DMM112L  | Cdkn2a <sup>-/-</sup> _C57 | SIN.LV.PGK.GFP | LIVER | 16 | 37533246 | - | NM_028812    | Gtf2e1        | - |
| DMM101   | Cdkn2a <sup>-/-</sup> _C57 | SIN.LV.PGK.GFP | LIVER | 16 | 38208197 | + | NM_019827    | Gsk3b         | + |
| DMM 104  | Cdkn2a <sup>-/-</sup> _C57 | SIN.LV.PGK.GFP | LIVER | 16 | 42911548 | + | NR_002445    | BC002163      | + |
| DMM112SA | Cdkn2a <sup>-/-</sup> _C57 | SIN.LV.PGK.GFP | LIVER | 16 | 43025363 | + | NR_002445    | BC002163      | + |
| DMM184   | Cdkn2a <sup>-/-</sup> _C57 | SIN.LV.PGK.GFP | LIVER | 16 | 44783150 | + | NM_021325    | Cd200r1       | + |
| DMM185   | Cdkn2a <sup>-/-</sup> _C57 | SIN.LV.PGK.GFP | LIVER | 16 | 44819776 | + | NM_207244    | Cd200r4       | + |
| DMM105   | Cdkn2a <sup>-/-</sup> _C57 | SIN.LV.PGK.GFP | LIVER | 16 | 44829838 | + | NM_207244    | Cd200r4       | + |
| DMM 112  | Cdkn2a <sup>-/-</sup> _C57 | SIN.LV.PGK.GFP | LIVER | 16 | 48878297 | - | NM_181596    | Retnlg        | + |
| DMM 88   | Cdkn2a <sup>-/-</sup> _C57 | SIN.LV.PGK.GFP | LIVER | 16 | 49047339 | + | NM_172616    | C330027C09Rik | + |

|         |                            |                |       |    |          |   |              |         |   |
|---------|----------------------------|----------------|-------|----|----------|---|--------------|---------|---|
| DMM 101 | Cdkn2a <sup>-/-</sup> _C57 | SIN.LV.PGK.GFP | LIVER | 16 | 49770822 | + | NM_028680    | Ift57   | + |
| DMM101  | Cdkn2a <sup>-/-</sup> _C57 | SIN.LV.PGK.GFP | LIVER | 16 | 49914302 | + | NM_010581    | Cd47    | + |
| DMM112L | Cdkn2a <sup>-/-</sup> _C57 | SIN.LV.PGK.GFP | LIVER | 16 | 50345852 | - | NM_027444    | Bbx     | - |
| DMM112L | Cdkn2a <sup>-/-</sup> _C57 | SIN.LV.PGK.GFP | LIVER | 16 | 50345913 | - | NM_027444    | Bbx     | - |
| DMM184  | Cdkn2a <sup>-/-</sup> _C57 | SIN.LV.PGK.GFP | LIVER | 16 | 57150840 | + | NM_138599    | Tomm70a | + |
| DMM112L | Cdkn2a <sup>-/-</sup> _C57 | SIN.LV.PGK.GFP | LIVER | 16 | 58725888 | + | NM_171826    | Cldnd1  | + |
| DMM 101 | Cdkn2a <sup>-/-</sup> _C57 | SIN.LV.PGK.GFP | LIVER | 16 | 59578776 | - | NM_174848    | Crybg3  | - |
| DMM 101 | Cdkn2a <sup>-/-</sup> _C57 | SIN.LV.PGK.GFP | LIVER | 16 | 62795204 | + | NM_026577    | Arl13b  | - |
| DMM182  | Cdkn2a <sup>-/-</sup> _C57 | SIN.LV.PGK.GFP | LIVER | 16 | 63666440 | - | NM_010140    | Epha3   | - |
| DMM106  | Cdkn2a <sup>-/-</sup> _C57 | SIN.LV.PGK.GFP | LIVER | 16 | 64824055 | + | NM_178647    | Cggbp1  | + |
| DMM112L | Cdkn2a <sup>-/-</sup> _C57 | SIN.LV.PGK.GFP | LIVER | 16 | 64829241 | + | NM_178647    | Cggbp1  | + |
| DMM184  | Cdkn2a <sup>-/-</sup> _C57 | SIN.LV.PGK.GFP | LIVER | 16 | 67325745 | - | NM_001145977 | Cadm2   | - |
| DMM182  | Cdkn2a <sup>-/-</sup> _C57 | SIN.LV.PGK.GFP | LIVER | 16 | 67475824 | - | NM_001145977 | Cadm2   | - |
| DMM181  | Cdkn2a <sup>-/-</sup> _C57 | SIN.LV.PGK.GFP | LIVER | 16 | 67889493 | - | NM_001145977 | Cadm2   | - |
| DMM112L | Cdkn2a <sup>-/-</sup> _C57 | SIN.LV.PGK.GFP | LIVER | 16 | 70445637 | + | NM_028803    | Gbe1    | + |
| DMM181  | Cdkn2a <sup>-/-</sup> _C57 | SIN.LV.PGK.GFP | LIVER | 16 | 71607254 | + | NM_028803    | Gbe1    | + |
| DMM181  | Cdkn2a <sup>-/-</sup> _C57 | SIN.LV.PGK.GFP | LIVER | 16 | 74150964 | - | NM_175549    | Robo2   | - |
| DMM182  | Cdkn2a <sup>-/-</sup> _C57 | SIN.LV.PGK.GFP | LIVER | 16 | 75898271 | - | NM_023380    | Samsn1  | - |
| DMM112L | Cdkn2a <sup>-/-</sup> _C57 | SIN.LV.PGK.GFP | LIVER | 16 | 75977459 | + | NM_023380    | Samsn1  | - |
| DMM 101 | Cdkn2a <sup>-/-</sup> _C57 | SIN.LV.PGK.GFP | LIVER | 16 | 76101655 | + | NM_173440    | Nrip1   | - |
| DMM112L | Cdkn2a <sup>-/-</sup> _C57 | SIN.LV.PGK.GFP | LIVER | 16 | 76610355 | - | NM_173440    | Nrip1   | - |
| DMM112L | Cdkn2a <sup>-/-</sup> _C57 | SIN.LV.PGK.GFP | LIVER | 16 | 77056680 | + | NM_013918    | Usp25   | + |
| DMM184  | Cdkn2a <sup>-/-</sup> _C57 | SIN.LV.PGK.GFP | LIVER | 16 | 85054621 | - | NM_007471    | App     | - |
| DMM184  | Cdkn2a <sup>-/-</sup> _C57 | SIN.LV.PGK.GFP | LIVER | 16 | 86532126 | - | NM_011782    | Adamts5 | - |
| DMM184  | Cdkn2a <sup>-/-</sup> _C57 | SIN.LV.PGK.GFP | LIVER | 16 | 87416236 | - | NM_001081068 | Rnf160  | - |
| DMM 101 | Cdkn2a <sup>-/-</sup> _C57 | SIN.LV.PGK.GFP | LIVER | 16 | 87710761 | - | NM_007520    | Bach1   | + |
| DMM182  | Cdkn2a <sup>-/-</sup> _C57 | SIN.LV.PGK.GFP | LIVER | 16 | 91292167 | + | NM_016968    | Olig1   | + |
| DMM 101 | Cdkn2a <sup>-/-</sup> _C57 | SIN.LV.PGK.GFP | LIVER | 16 | 94631113 | - | NM_009441    | Ttc3    | + |
| DMM181  | Cdkn2a <sup>-/-</sup> _C57 | SIN.LV.PGK.GFP | LIVER | 16 | 94881496 | + | NM_001113389 | Dyrk1a  | + |
| DMM182  | Cdkn2a <sup>-/-</sup> _C57 | SIN.LV.PGK.GFP | LIVER | 17 | 7469121  | + | NM_011299    | Rps6ka2 | + |
| DMM182  | Cdkn2a <sup>-/-</sup> _C57 | SIN.LV.PGK.GFP | LIVER | 17 | 13166358 | - | NM_001113532 | Wtap    | - |

|         |                            |                |       |    |          |   |              |         |   |
|---------|----------------------------|----------------|-------|----|----------|---|--------------|---------|---|
| DMM 88  | Cdkn2a <sup>-/-</sup> _C57 | SIN.LV.PGK.GFP | LIVER | 17 | 13961465 | + | NM_010806    | Milt4   | + |
| DMM101  | Cdkn2a <sup>-/-</sup> _C57 | SIN.LV.PGK.GFP | LIVER | 17 | 17744974 | - | NM_172827    | Lnpep   | - |
| DMM 101 | Cdkn2a <sup>-/-</sup> _C57 | SIN.LV.PGK.GFP | LIVER | 17 | 18032064 | + | NM_008039    | Fpr2    | + |
| DMM 101 | Cdkn2a <sup>-/-</sup> _C57 | SIN.LV.PGK.GFP | LIVER | 17 | 19354966 | - | NM_001104551 | Vmn2r99 | + |
| DMM181  | Cdkn2a <sup>-/-</sup> _C57 | SIN.LV.PGK.GFP | LIVER | 17 | 21881840 | + | NM_001008501 | Zfp760  | + |
| DMM182  | Cdkn2a <sup>-/-</sup> _C57 | SIN.LV.PGK.GFP | LIVER | 17 | 26721678 | + | NM_026170    | Ergic1  | + |
| DMM 112 | Cdkn2a <sup>-/-</sup> _C57 | SIN.LV.PGK.GFP | LIVER | 17 | 37717223 | + | NM_146289    | Olf113  | - |
| DMM 112 | Cdkn2a <sup>-/-</sup> _C57 | SIN.LV.PGK.GFP | LIVER | 17 | 42990682 | - | NM_009847    | Cd2ap   | - |
| DMM182  | Cdkn2a <sup>-/-</sup> _C57 | SIN.LV.PGK.GFP | LIVER | 17 | 47132928 | - | NM_146078    | Ubr2    | - |
| DMM 112 | Cdkn2a <sup>-/-</sup> _C57 | SIN.LV.PGK.GFP | LIVER | 17 | 50816002 | - | NM_013880    | Plcl2   | + |
| DMM101  | Cdkn2a <sup>-/-</sup> _C57 | SIN.LV.PGK.GFP | LIVER | 17 | 51052153 | - | NM_028162    | Tbc1d5  | - |
| DMM182  | Cdkn2a <sup>-/-</sup> _C57 | SIN.LV.PGK.GFP | LIVER | 17 | 61454507 | - | NM_010109    | Efna5   | - |
| DMM101  | Cdkn2a <sup>-/-</sup> _C57 | SIN.LV.PGK.GFP | LIVER | 17 | 63543554 | - | NM_010109    | Efna5   | - |
| DMM 101 | Cdkn2a <sup>-/-</sup> _C57 | SIN.LV.PGK.GFP | LIVER | 17 | 63792759 | + | NM_001037997 | Fert2   | + |
| DMM 88  | Cdkn2a <sup>-/-</sup> _C57 | SIN.LV.PGK.GFP | LIVER | 17 | 63807909 | + | NM_001037997 | Fert2   | + |
| DMM 101 | Cdkn2a <sup>-/-</sup> _C57 | SIN.LV.PGK.GFP | LIVER | 17 | 65072389 | + | NM_008549    | Man2a1  | + |
| DMM101  | Cdkn2a <sup>-/-</sup> _C57 | SIN.LV.PGK.GFP | LIVER | 17 | 65927525 | - | NM_013933    | Vapa    | - |
| DMM112L | Cdkn2a <sup>-/-</sup> _C57 | SIN.LV.PGK.GFP | LIVER | 17 | 71764648 | - | NM_028887    | Smchd1  | - |
| DMM181  | Cdkn2a <sup>-/-</sup> _C57 | SIN.LV.PGK.GFP | LIVER | 17 | 72481289 | - | NM_007439    | Alk     | - |
| DMM 101 | Cdkn2a <sup>-/-</sup> _C57 | SIN.LV.PGK.GFP | LIVER | 17 | 73534473 |   | NM_001081071 | Lclat1  | + |
| DMM101  | Cdkn2a <sup>-/-</sup> _C57 | SIN.LV.PGK.GFP | LIVER | 17 | 74640951 | - | NM_133771    | Memo1   | - |
| DMM181  | Cdkn2a <sup>-/-</sup> _C57 | SIN.LV.PGK.GFP | LIVER | 17 | 75003565 | + | NM_007566    | Birc6   | + |
| DMM109  | Cdkn2a <sup>-/-</sup> _C57 | SIN.LV.PGK.GFP | LIVER | 17 | 79101469 | - | NM_011500    | Strn    | - |
| DMM 88  | Cdkn2a <sup>-/-</sup> _C57 | SIN.LV.PGK.GFP | LIVER | 17 | 80406698 | - | NM_144802    | Hnrp11  | - |
| DMM112L | Cdkn2a <sup>-/-</sup> _C57 | SIN.LV.PGK.GFP | LIVER | 17 | 88424388 | - | NM_001081034 | Fbxo11  | - |
| DMM112L | Cdkn2a <sup>-/-</sup> _C57 | SIN.LV.PGK.GFP | LIVER | 17 | 88429563 | - | NM_001081034 | Fbxo11  | - |
| DMM182  | Cdkn2a <sup>-/-</sup> _C57 | SIN.LV.PGK.GFP | LIVER | 17 | 90919810 | - | NM_020252    | Nrxn1   | - |
| DMM181  | Cdkn2a <sup>-/-</sup> _C57 | SIN.LV.PGK.GFP | LIVER | 17 | 90965439 | - | NM_020252    | Nrxn1   | - |
| DMM184  | Cdkn2a <sup>-/-</sup> _C57 | SIN.LV.PGK.GFP | LIVER | 18 | 4332288  | - | NM_007746    | Map3k8  | - |
| DMM113  | Cdkn2a <sup>-/-</sup> _C57 | SIN.LV.PGK.GFP | LIVER | 18 | 4332352  | - | NM_007746    | Map3k8  | - |
| DMM113  | Cdkn2a <sup>-/-</sup> _C57 | SIN.LV.PGK.GFP | LIVER | 18 | 4333776  | - | NM_007746    | Map3k8  | - |

|         |                            |                |       |    |          |   |              |               |   |
|---------|----------------------------|----------------|-------|----|----------|---|--------------|---------------|---|
| DMM183  | Cdkn2a <sup>-/-</sup> _C57 | SIN.LV.PGK.GFP | LIVER | 18 | 4333844  | - | NM_007746    | Map3k8        | - |
| DMM112L | Cdkn2a <sup>-/-</sup> _C57 | SIN.LV.PGK.GFP | LIVER | 18 | 6200818  | - | NM_008448    | Kif5b         | - |
| DMM 88  | Cdkn2a <sup>-/-</sup> _C57 | SIN.LV.PGK.GFP | LIVER | 18 | 6238448  |   | NM_008448    | Kif5b         | - |
| DMM112L | Cdkn2a <sup>-/-</sup> _C57 | SIN.LV.PGK.GFP | LIVER | 18 | 6767620  | + | NM_181070    | Rab18         | + |
| DMM181  | Cdkn2a <sup>-/-</sup> _C57 | SIN.LV.PGK.GFP | LIVER | 18 | 10175950 | - | NM_009071    | Rock1         | - |
| DMM101  | Cdkn2a <sup>-/-</sup> _C57 | SIN.LV.PGK.GFP | LIVER | 18 | 10641275 | - | NM_134130    | Abhd3         | - |
| DMM 112 | Cdkn2a <sup>-/-</sup> _C57 | SIN.LV.PGK.GFP | LIVER | 18 | 20873838 | + | NM_019737    | B4galt6       | - |
| DMM 88  | Cdkn2a <sup>-/-</sup> _C57 | SIN.LV.PGK.GFP | LIVER | 18 | 21031049 | - | NM_029491    | D030074E01Rik | - |
| DMM101  | Cdkn2a <sup>-/-</sup> _C57 | SIN.LV.PGK.GFP | LIVER | 18 | 23350668 | + | NM_199024    | Nol4          | - |
| DMM 88  | Cdkn2a <sup>-/-</sup> _C57 | SIN.LV.PGK.GFP | LIVER | 18 | 26986845 | - | NM_001146292 | Bruno14       | - |
| DMM106  | Cdkn2a <sup>-/-</sup> _C57 | SIN.LV.PGK.GFP | LIVER | 18 | 30470891 | + | NM_181414    | Pik3c3        | + |
| DMM112L | Cdkn2a <sup>-/-</sup> _C57 | SIN.LV.PGK.GFP | LIVER | 18 | 32241641 | + | NM_173441    | Iws1          | + |
| DMM 88  | Cdkn2a <sup>-/-</sup> _C57 | SIN.LV.PGK.GFP | LIVER | 18 | 32353131 | + | NM_011946    | Map3k2        | + |
| DMM182  | Cdkn2a <sup>-/-</sup> _C57 | SIN.LV.PGK.GFP | LIVER | 18 | 33013297 | + | NM_001110016 | Wdr36         | + |
| DMM105  | Cdkn2a <sup>-/-</sup> _C57 | SIN.LV.PGK.GFP | LIVER | 18 | 36578565 | - | NM_026027    | Pfdn1         | - |
| DMM112L | Cdkn2a <sup>-/-</sup> _C57 | SIN.LV.PGK.GFP | LIVER | 18 | 39643169 | - | NM_008173    | Nr3c1         | - |
| DMM112L | Cdkn2a <sup>-/-</sup> _C57 | SIN.LV.PGK.GFP | LIVER | 18 | 44577115 | + | NM_027490    | Dcp2          | + |
| DMM184  | Cdkn2a <sup>-/-</sup> _C57 | SIN.LV.PGK.GFP | LIVER | 18 | 46676788 | - | NM_173423    | Fem1c         | - |
| DMM112L | Cdkn2a <sup>-/-</sup> _C57 | SIN.LV.PGK.GFP | LIVER | 18 | 47221975 | + | NM_178377    | Commd10       | + |
| DMM182  | Cdkn2a <sup>-/-</sup> _C57 | SIN.LV.PGK.GFP | LIVER | 18 | 47956242 | + | NM_001025388 | Gm5506        | + |
| DMM183  | Cdkn2a <sup>-/-</sup> _C57 | SIN.LV.PGK.GFP | LIVER | 18 | 49813186 | - | NM_026854    | Dtwd2         | - |
| DMM 112 | Cdkn2a <sup>-/-</sup> _C57 | SIN.LV.PGK.GFP | LIVER | 18 | 50223093 | + | NM_134131    | Tnfaip8       | + |
| DMM112L | Cdkn2a <sup>-/-</sup> _C57 | SIN.LV.PGK.GFP | LIVER | 18 | 52334773 | + | NM_026286    | Ftmt          | + |
| DMM109  | Cdkn2a <sup>-/-</sup> _C57 | SIN.LV.PGK.GFP | LIVER | 18 | 55133847 | - | NM_175751    | Zfp608        | - |
| DMM 88  | Cdkn2a <sup>-/-</sup> _C57 | SIN.LV.PGK.GFP | LIVER | 18 | 62672505 | + | NM_134136    | Fbxo38        | - |
| DMM101  | Cdkn2a <sup>-/-</sup> _C57 | SIN.LV.PGK.GFP | LIVER | 18 | 64626097 | - | NM_007998    | Fech          | - |
| DMM112L | Cdkn2a <sup>-/-</sup> _C57 | SIN.LV.PGK.GFP | LIVER | 18 | 64927231 | - | NM_001001488 | Atp8b1        | - |
| DMM 112 | Cdkn2a <sup>-/-</sup> _C57 | SIN.LV.PGK.GFP | LIVER | 18 | 65758489 | + | NM_207255    | Zfp532        | + |
| DMM 112 | Cdkn2a <sup>-/-</sup> _C57 | SIN.LV.PGK.GFP | LIVER | 18 | 67998855 | - | NM_001039088 | Seh1l         | + |
| DMM181  | Cdkn2a <sup>-/-</sup> _C57 | SIN.LV.PGK.GFP | LIVER | 18 | 69747211 | + | NM_001083967 | Tcf4          | + |
| DMM 101 | Cdkn2a <sup>-/-</sup> _C57 | SIN.LV.PGK.GFP | LIVER | 18 | 70620731 | + | NM_172967    | 4930503L19Rik | - |

|          |                            |                |       |    |          |   |              |          |   |
|----------|----------------------------|----------------|-------|----|----------|---|--------------|----------|---|
| DMM101   | Cdkn2a <sup>-/-</sup> _C57 | SIN.LV.PGK.GFP | LIVER | 18 | 77385709 | + | NM_008602    | Pias2    | + |
| DMM101   | Cdkn2a <sup>-/-</sup> _C57 | SIN.LV.PGK.GFP | LIVER | 18 | 84411818 | - | NM_146090    | Zadh2    | + |
| DMM112SA | Cdkn2a <sup>-/-</sup> _C57 | SIN.LV.PGK.GFP | LIVER | 18 | 85025308 | + | NM_025797    | Cyb5     | + |
| DMM 112  | Cdkn2a <sup>-/-</sup> _C57 | SIN.LV.PGK.GFP | LIVER | 18 | 89065711 | + | NM_018821    | Socs6    | - |
| DMM111   | Cdkn2a <sup>-/-</sup> _C57 | SIN.LV.PGK.GFP | LIVER | 18 | 89185410 | + | NM_175542    | Rtnn     | + |
| DMM101   | Cdkn2a <sup>-/-</sup> _C57 | SIN.LV.PGK.GFP | LIVER | 18 | 90691289 | + | NM_198295    | Tmx3     | + |
| DMM182   | Cdkn2a <sup>-/-</sup> _C57 | SIN.LV.PGK.GFP | LIVER | 18 | 90707655 | + | NM_198295    | Tmx3     | + |
| DMM182   | Cdkn2a <sup>-/-</sup> _C57 | SIN.LV.PGK.GFP | LIVER | 19 | 5590702  | + | NM_026616    | Rnaseh2c | + |
| DMM113   | Cdkn2a <sup>-/-</sup> _C57 | SIN.LV.PGK.GFP | LIVER | 19 | 6190803  | + | NM_028967    | Batf2    | + |
| DMM 101  | Cdkn2a <sup>-/-</sup> _C57 | SIN.LV.PGK.GFP | LIVER | 19 | 14556900 | + | NM_011600    | Tle4     | - |
| DMM 101  | Cdkn2a <sup>-/-</sup> _C57 | SIN.LV.PGK.GFP | LIVER | 19 | 15287572 | - | NM_011600    | Tle4     | - |
| DMM 101  | Cdkn2a <sup>-/-</sup> _C57 | SIN.LV.PGK.GFP | LIVER | 19 | 16281924 | + | NM_008139    | Gnaq     | + |
| DMM182   | Cdkn2a <sup>-/-</sup> _C57 | SIN.LV.PGK.GFP | LIVER | 19 | 19824337 | - | NM_010730    | Anxa1    | - |
| DMM112L  | Cdkn2a <sup>-/-</sup> _C57 | SIN.LV.PGK.GFP | LIVER | 19 | 20976114 | - | NM_028953    | Tmc1     | - |
| DMM182   | Cdkn2a <sup>-/-</sup> _C57 | SIN.LV.PGK.GFP | LIVER | 19 | 21731207 | + | NM_146096    | Fam108b  | + |
| DMM182   | Cdkn2a <sup>-/-</sup> _C57 | SIN.LV.PGK.GFP | LIVER | 19 | 22345767 | + | NM_001035239 | Trpm3    | + |
| DMM182   | Cdkn2a <sup>-/-</sup> _C57 | SIN.LV.PGK.GFP | LIVER | 19 | 22682313 | + | NM_177341    | Trpm3    | + |
| DMM 101  | Cdkn2a <sup>-/-</sup> _C57 | SIN.LV.PGK.GFP | LIVER | 19 | 23335271 | - | NM_153808    | Smc5     | - |
| DMM184   | Cdkn2a <sup>-/-</sup> _C57 | SIN.LV.PGK.GFP | LIVER | 19 | 32291051 | - | NM_144792    | Sgms1    | - |
| DMM105   | Cdkn2a <sup>-/-</sup> _C57 | SIN.LV.PGK.GFP | LIVER | 19 | 32838178 | + | NM_008960    | Pten     | + |
| DMM112L  | Cdkn2a <sup>-/-</sup> _C57 | SIN.LV.PGK.GFP | LIVER | 19 | 32838267 | + | NM_008960    | Pten     | + |
| DMM106   | Cdkn2a <sup>-/-</sup> _C57 | SIN.LV.PGK.GFP | LIVER | 19 | 32851988 | + | NM_008960    | Pten     | + |
| DMM112L  | Cdkn2a <sup>-/-</sup> _C57 | SIN.LV.PGK.GFP | LIVER | 19 | 32874260 | + | NM_008960    | Pten     | + |
| DMM184   | Cdkn2a <sup>-/-</sup> _C57 | SIN.LV.PGK.GFP | LIVER | 19 | 32874395 | + | NM_008960    | Pten     | + |
| DMM105   | Cdkn2a <sup>-/-</sup> _C57 | SIN.LV.PGK.GFP | LIVER | 19 | 32886302 | + | NM_008960    | Pten     | + |
| DMM101   | Cdkn2a <sup>-/-</sup> _C57 | SIN.LV.PGK.GFP | LIVER | 19 | 38917088 | + | NM_145952    | Tbc1d12  | + |
| DMM183   | Cdkn2a <sup>-/-</sup> _C57 | SIN.LV.PGK.GFP | LIVER | 19 | 45015713 | + | NM_001081225 | Fam178a  | + |
| DMM112L  | Cdkn2a <sup>-/-</sup> _C57 | SIN.LV.PGK.GFP | LIVER | 19 | 47004737 | - | NM_029810    | Nt5c2    | - |
| DMM 88   | Cdkn2a <sup>-/-</sup> _C57 | SIN.LV.PGK.GFP | LIVER | 19 | 53078099 | + | NM_133216    | Xpnpep1  | - |
| DMM182   | Cdkn2a <sup>-/-</sup> _C57 | SIN.LV.PGK.GFP | LIVER | 19 | 57165387 | - | NM_001103178 | Ablim1   | - |
| DMM112L  | Cdkn2a <sup>-/-</sup> _C57 | SIN.LV.PGK.GFP | LIVER | 19 | 58104647 | + | NM_181415    | Atrnl1   | + |

|         |                            |                |       |   |           |   |              |               |   |
|---------|----------------------------|----------------|-------|---|-----------|---|--------------|---------------|---|
| DMM 112 | Cdkn2a <sup>-/-</sup> _C57 | SIN.LV.PGK.GFP | LIVER | X | 13175256  |   | NM_009806    | Cask          | - |
| DMM112L | Cdkn2a <sup>-/-</sup> _C57 | SIN.LV.PGK.GFP | LIVER | X | 17807696  | + | NM_009483    | Kdm6a         | + |
| DMM182  | Cdkn2a <sup>-/-</sup> _C57 | SIN.LV.PGK.GFP | LIVER | X | 22833944  | - | NM_026167    | Klh13         | - |
| DMM 112 | Cdkn2a <sup>-/-</sup> _C57 | SIN.LV.PGK.GFP | LIVER | X | 34688703  | + | NM_025937    | Nkap          | + |
| DMM182  | Cdkn2a <sup>-/-</sup> _C57 | SIN.LV.PGK.GFP | LIVER | X | 63927523  | + | NM_001161431 | Slitrk2       | + |
| DMM182  | Cdkn2a <sup>-/-</sup> _C57 | SIN.LV.PGK.GFP | LIVER | X | 64525414  | + | NM_001126317 | Gm1140        | - |
| DMM 101 | Cdkn2a <sup>-/-</sup> _C57 | SIN.LV.PGK.GFP | LIVER | X | 65743083  |   | NM_008031    | Fmr1          | + |
| DMM 101 | Cdkn2a <sup>-/-</sup> _C57 | SIN.LV.PGK.GFP | LIVER | X | 65935589  | - | NM_008031    | Fmr1          | + |
| DMM114  | Cdkn2a <sup>-/-</sup> _C57 | SIN.LV.PGK.GFP | LIVER | X | 74786482  | + | NM_020601    | Tbl1x         | + |
| DMM106  | Cdkn2a <sup>-/-</sup> _C57 | SIN.LV.PGK.GFP | LIVER | X | 82832577  | + | NM_025729    | Map3k7ip3     | + |
| DMM112L | Cdkn2a <sup>-/-</sup> _C57 | SIN.LV.PGK.GFP | LIVER | X | 82848708  | + | NM_025729    | Map3k7ip3     | + |
| DMM105  | Cdkn2a <sup>-/-</sup> _C57 | SIN.LV.PGK.GFP | LIVER | X | 90715938  | - | NM_008892    | Pola1         | - |
| DMM111  | Cdkn2a <sup>-/-</sup> _C57 | SIN.LV.PGK.GFP | LIVER | X | 97873014  | + | NM_008446    | Kif4          | + |
| DMM113  | Cdkn2a <sup>-/-</sup> _C57 | SIN.LV.PGK.GFP | LIVER | X | 100767764 | - | NM_001045541 | Gm9785        | - |
| DMM114  | Cdkn2a <sup>-/-</sup> _C57 | SIN.LV.PGK.GFP | LIVER | X | 102293562 | + | NM_026312    | 2610029G23Rik | + |
| DMM112L | Cdkn2a <sup>-/-</sup> _C57 | SIN.LV.PGK.GFP | LIVER | X | 102542990 | - | NM_173436    | Cypt2         | + |
| DMM181  | Cdkn2a <sup>-/-</sup> _C57 | SIN.LV.PGK.GFP | LIVER | X | 103773793 | - | NM_021476    | Cysltr1       | - |
| DMM184  | Cdkn2a <sup>-/-</sup> _C57 | SIN.LV.PGK.GFP | LIVER | X | 104976879 | - | NM_025921    | 2610002M06Rik | - |
| DMM182  | Cdkn2a <sup>-/-</sup> _C57 | SIN.LV.PGK.GFP | LIVER | X | 107970964 | + | NM_008901    | Pou3f4        | + |
| DMM112L | Cdkn2a <sup>-/-</sup> _C57 | SIN.LV.PGK.GFP | LIVER | X | 108526342 | - | NM_025949    | Rps6ka6       | - |
| DMM112L | Cdkn2a <sup>-/-</sup> _C57 | SIN.LV.PGK.GFP | LIVER | X | 108526731 | - | NM_025949    | Rps6ka6       | - |
| DMM 112 | Cdkn2a <sup>-/-</sup> _C57 | SIN.LV.PGK.GFP | LIVER | X | 110261184 | - | NM_018818    | Chm           | - |
| DMM112L | Cdkn2a <sup>-/-</sup> _C57 | SIN.LV.PGK.GFP | LIVER | X | 119875264 | + | NM_028426    | 3110007F17Rik | + |
| DMM 101 | Cdkn2a <sup>-/-</sup> _C57 | SIN.LV.PGK.GFP | LIVER | X | 126899313 | - | NM_172493    | Diap2         | + |
| DMM181  | Cdkn2a <sup>-/-</sup> _C57 | SIN.LV.PGK.GFP | LIVER | X | 130199708 | - | NM_001105245 | Pcdh19        | - |
| DMM 101 | Cdkn2a <sup>-/-</sup> _C57 | SIN.LV.PGK.GFP | LIVER | X | 133039994 | - | NM_177749    | Kir3dl1       | + |
| DMM182  | Cdkn2a <sup>-/-</sup> _C57 | SIN.LV.PGK.GFP | LIVER | X | 134378863 | + | NM_030688    | Il1rap12      | + |
| DMM184  | Cdkn2a <sup>-/-</sup> _C57 | SIN.LV.PGK.GFP | LIVER | X | 139389130 | - | NM_019496    | Ammecr1       | - |
| DMM 112 | Cdkn2a <sup>-/-</sup> _C57 | SIN.LV.PGK.GFP | LIVER | X | 140611757 |   | NM_026247    | Alg13         | + |
| DMM 112 | Cdkn2a <sup>-/-</sup> _C57 | SIN.LV.PGK.GFP | LIVER | X | 141440598 | + | NM_001033795 | Zcchc16       | + |
| DMM184  | Cdkn2a <sup>-/-</sup> _C57 | SIN.LV.PGK.GFP | LIVER | X | 147733843 | + | NM_198105    | Fam120c       | + |

|         |                            |                |        |   |           |   |              |               |   |
|---------|----------------------------|----------------|--------|---|-----------|---|--------------|---------------|---|
| DMM 105 | Cdkn2a <sup>+/-</sup> _C57 | SIN.LV.PGK.GFP | LIVER  | X | 148286506 | - | NM_021523    | Huwe1         | + |
| DMM184  | Cdkn2a <sup>+/-</sup> _C57 | SIN.LV.PGK.GFP | LIVER  | X | 149849261 | + | NM_173780    | Klf8          | + |
| DMM112L | Cdkn2a <sup>+/-</sup> _C57 | SIN.LV.PGK.GFP | LIVER  | X | 150172758 | + | NM_175429    | Kctd12b       | - |
| DMM112L | Cdkn2a <sup>+/-</sup> _C57 | SIN.LV.PGK.GFP | LIVER  | X | 151724488 | + | NM_019736    | Acot9         | + |
| DMM182  | Cdkn2a <sup>+/-</sup> _C57 | SIN.LV.PGK.GFP | LIVER  | X | 159363047 | + | NM_018737    | Ctps2         | + |
| DMM112L | Cdkn2a <sup>+/-</sup> _C57 | SIN.LV.PGK.GFP | LIVER  | X | 164881050 | - | NM_001033330 | Frmpd4        | - |
| E-DMM70 | Cdkn2a <sup>+/-</sup> _C57 | SIN.LV.SF      | LIVER  | 1 | 7086159   | + | NM_183028    | Pcmd1         | + |
| E-DMM70 | Cdkn2a <sup>+/-</sup> _C57 | SIN.LV.SF      | LIVER  | 1 | 7145680   | + | NM_183028    | Pcmd1         | + |
| E-DMM70 | Cdkn2a <sup>+/-</sup> _C57 | SIN.LV.SF      | LIVER  | 1 | 7216417   | + | NM_183028    | Pcmd1         | + |
| E-DMM70 | Cdkn2a <sup>+/-</sup> _C57 | SIN.LV.SF      | LIVER  | 1 | 9589583   | + | NM_178399    | 3110035E14Rik | + |
| E-DMM70 | Cdkn2a <sup>+/-</sup> _C57 | SIN.LV.SF      | LIVER  | 1 | 9662380   | + | NM_008651    | Mybl1         | - |
| E-DMM70 | Cdkn2a <sup>+/-</sup> _C57 | SIN.LV.SF      | LIVER  | 1 | 13348060  | + | NM_001077695 | Ncoa2         | - |
| E-DMM70 | Cdkn2a <sup>+/-</sup> _C57 | SIN.LV.SF      | LIVER  | 1 | 30865717  | + | NM_001081080 | Phf3          | - |
| E-DMM76 | Cdkn2a <sup>+/-</sup> _C57 | SIN.LV.SF      | SPLEEN | 1 | 33537851  | - | NM_008922    | Prim2         | - |
| E-DMM70 | Cdkn2a <sup>+/-</sup> _C57 | SIN.LV.SF      | LIVER  | 1 | 34825025  | - | NM_183019    | Arhgef4       | + |
| E-DMM76 | Cdkn2a <sup>+/-</sup> _C57 | SIN.LV.SF      | SPLEEN | 1 | 44201480  | + | NM_144558    | Bivm          | + |
| E-DMM70 | Cdkn2a <sup>+/-</sup> _C57 | SIN.LV.SF      | LIVER  | 1 | 45385959  | - | NM_009930    | Col3a1        | + |
| E-DMM74 | Cdkn2a <sup>+/-</sup> _C57 | SIN.LV.SF      | LIVER  | 1 | 52524704  | - | NM_008667    | Nab1          | - |
| E-DMM70 | Cdkn2a <sup>+/-</sup> _C57 | SIN.LV.SF      | LIVER  | 1 | 55870602  | - | NM_001114663 | Plcl1         | + |
| E-DMM70 | Cdkn2a <sup>+/-</sup> _C57 | SIN.LV.SF      | LIVER  | 1 | 70230521  | + | NM_025728    | Spag16        | + |
| E-DMM75 | Cdkn2a <sup>+/-</sup> _C57 | SIN.LV.SF      | LIVER  | 1 | 80455514  | + | NM_175291    | Dock10        | - |
| E-DMM70 | Cdkn2a <sup>+/-</sup> _C57 | SIN.LV.SF      | LIVER  | 1 | 84055605  | + | NM_001003948 | 5033414K04Rik | - |
| E-DMM70 | Cdkn2a <sup>+/-</sup> _C57 | SIN.LV.SF      | LIVER  | 1 | 84172972  | - | NM_001003948 | 5033414K04Rik | - |
| E-DMM70 | Cdkn2a <sup>+/-</sup> _C57 | SIN.LV.SF      | LIVER  | 1 | 84408460  | - | NM_152915    | Dner          | - |
| E-DMM70 | Cdkn2a <sup>+/-</sup> _C57 | SIN.LV.SF      | LIVER  | 1 | 90158348  | - | NM_198652    | 6430706D22Rik | - |
| E-DMM69 | Cdkn2a <sup>+/-</sup> _C57 | SIN.LV.SF      | LIVER  | 1 | 96046788  | - | NM_008798    | Pcd1          | - |
| E-DMM70 | Cdkn2a <sup>+/-</sup> _C57 | SIN.LV.SF      | LIVER  | 1 | 97548658  | + | NM_001159745 | St8sia4       | - |
| E-DMM70 | Cdkn2a <sup>+/-</sup> _C57 | SIN.LV.SF      | LIVER  | 1 | 99458160  | + | NM_133825    | D1Ert622e     | - |
| E-DMM70 | Cdkn2a <sup>+/-</sup> _C57 | SIN.LV.SF      | LIVER  | 1 | 107892904 | - | NM_001122675 | Zcchc2        | + |
| E-DMM70 | Cdkn2a <sup>+/-</sup> _C57 | SIN.LV.SF      | LIVER  | 1 | 107923444 | + | NM_001122675 | Zcchc2        | + |
| E-DMM70 | Cdkn2a <sup>+/-</sup> _C57 | SIN.LV.SF      | LIVER  | 1 | 109345886 | + | NM_027548    | Serpib7       | + |



|         |                            |           |        |   |           |   |              |          |   |
|---------|----------------------------|-----------|--------|---|-----------|---|--------------|----------|---|
| E-DMM68 | Cdkn2a <sup>+/+</sup> _C57 | SIN.LV.SF | LIVER  | 1 | 111557410 | - | NM_172853    | Cdh7     | + |
| E-DMM76 | Cdkn2a <sup>+/+</sup> _C57 | SIN.LV.SF | SPLEEN | 1 | 117584535 | - | NM_001077425 | Cntnap5a | + |
| E-DMM76 | Cdkn2a <sup>+/+</sup> _C57 | SIN.LV.SF | SPLEEN | 1 | 125852549 | - | NM_199021    | Dpp10    | - |
| E-DMM70 | Cdkn2a <sup>+/+</sup> _C57 | SIN.LV.SF | LIVER  | 1 | 139830304 | + | NM_001111316 | Ptprc    | - |
| E-DMM68 | Cdkn2a <sup>+/+</sup> _C57 | SIN.LV.SF | LIVER  | 1 | 140066188 | - | NM_001111316 | Ptprc    | - |
| E-DMM76 | Cdkn2a <sup>+/+</sup> _C57 | SIN.LV.SF | SPLEEN | 1 | 140433229 | + | NM_021605    | Nek7     | - |
| E-DMM70 | Cdkn2a <sup>+/+</sup> _C57 | SIN.LV.SF | LIVER  | 1 | 143795803 | - | NM_001081027 | Kcnt2    | + |
| E-DMM70 | Cdkn2a <sup>+/+</sup> _C57 | SIN.LV.SF | LIVER  | 1 | 150774701 | - | NM_008869    | Pla2g4a  | - |
| E-DMM68 | Cdkn2a <sup>+/+</sup> _C57 | SIN.LV.SF | LIVER  | 1 | 168395116 | + | NM_001142948 | Pogk     | - |
| E-DMM70 | Cdkn2a <sup>+/+</sup> _C57 | SIN.LV.SF | LIVER  | 1 | 179097304 | - | NM_011785    | Akt3     | - |
| E-DMM69 | Cdkn2a <sup>+/+</sup> _C57 | SIN.LV.SF | LIVER  | 1 | 181335575 | + | NM_027188    | Smyd3    | - |
| E-DMM70 | Cdkn2a <sup>+/+</sup> _C57 | SIN.LV.SF | LIVER  | 1 | 181354897 | + | NM_027188    | Smyd3    | - |
| E-DMM75 | Cdkn2a <sup>+/+</sup> _C57 | SIN.LV.SF | LIVER  | 1 | 181686111 | + | NM_026375    | Ahctf1   | - |
| E-DMM74 | Cdkn2a <sup>+/+</sup> _C57 | SIN.LV.SF | LIVER  | 1 | 190993237 | + | NM_001159850 | Kenk2    | - |
| E-DMM70 | Cdkn2a <sup>+/+</sup> _C57 | SIN.LV.SF | LIVER  | 2 | 16666525  | - | NM_026162    | Plxdc2   | + |
| E-DMM75 | Cdkn2a <sup>+/+</sup> _C57 | SIN.LV.SF | LIVER  | 2 | 18067519  | + | NM_010804    | Mllt10   | + |
| E-DMM70 | Cdkn2a <sup>+/+</sup> _C57 | SIN.LV.SF | LIVER  | 2 | 24173547  | + | NM_031167    | Il1rn    | + |
| E-DMM70 | Cdkn2a <sup>+/+</sup> _C57 | SIN.LV.SF | LIVER  | 2 | 36011753  | - | NM_026422    | Mrrf     | + |
| E-DMM69 | Cdkn2a <sup>+/+</sup> _C57 | SIN.LV.SF | LIVER  | 2 | 37385800  | + | NM_001033960 | Rabgap1  | + |
| E-DMM69 | Cdkn2a <sup>+/+</sup> _C57 | SIN.LV.SF | LIVER  | 2 | 38019270  | + | NM_146122    | Dennd1a  | - |
| E-DMM75 | Cdkn2a <sup>+/+</sup> _C57 | SIN.LV.SF | LIVER  | 2 | 46377587  | - | NM_015753    | Zeb2     | - |
| E-DMM70 | Cdkn2a <sup>+/+</sup> _C57 | SIN.LV.SF | LIVER  | 2 | 47557717  | + | NM_007396    | Acvr2a   | + |
| E-DMM70 | Cdkn2a <sup>+/+</sup> _C57 | SIN.LV.SF | LIVER  | 2 | 48675177  | + | NM_007396    | Acvr2a   | + |
| E-DMM70 | Cdkn2a <sup>+/+</sup> _C57 | SIN.LV.SF | LIVER  | 2 | 48676540  | + | NM_007396    | Acvr2a   | + |
| E-DMM74 | Cdkn2a <sup>+/+</sup> _C57 | SIN.LV.SF | LIVER  | 2 | 68265480  | - | NM_016866    | Stk39    | - |
| E-DMM70 | Cdkn2a <sup>+/+</sup> _C57 | SIN.LV.SF | LIVER  | 2 | 68742553  | - | NM_172856    | Lass6    | + |
| E-DMM70 | Cdkn2a <sup>+/+</sup> _C57 | SIN.LV.SF | LIVER  | 2 | 68832832  | + | NM_172856    | Lass6    | + |
| E-DMM70 | Cdkn2a <sup>+/+</sup> _C57 | SIN.LV.SF | LIVER  | 2 | 75592396  | + | NM_010902    | Nfe2l2   | - |
| E-DMM70 | Cdkn2a <sup>+/+</sup> _C57 | SIN.LV.SF | LIVER  | 2 | 78884915  | + | NM_009454    | Ube2e3   | + |
| E-DMM76 | Cdkn2a <sup>+/+</sup> _C57 | SIN.LV.SF | SPLEEN | 2 | 80163867  | - | NM_024181    | Dnajc10  | + |
| E-DMM70 | Cdkn2a <sup>+/+</sup> _C57 | SIN.LV.SF | LIVER  | 2 | 80169382  | - | NM_024181    | Dnajc10  | + |

|         |                            |           |        |   |           |   |              |               |   |
|---------|----------------------------|-----------|--------|---|-----------|---|--------------|---------------|---|
| E-DMM70 | Cdkn2a <sup>+/+</sup> _C57 | SIN.LV.SF | LIVER  | 2 | 83551964  | - | NM_008402    | Itgav         | + |
| E-DMM70 | Cdkn2a <sup>+/+</sup> _C57 | SIN.LV.SF | LIVER  | 2 | 84014197  | - | NM_018782    | Calcr1        | - |
| E-DMM75 | Cdkn2a <sup>+/+</sup> _C57 | SIN.LV.SF | LIVER  | 2 | 84159611  | + | NM_018782    | Calcr1        | - |
| E-DMM68 | Cdkn2a <sup>+/+</sup> _C57 | SIN.LV.SF | LIVER  | 2 | 109160929 | + | NM_139303    | Kif18a        | + |
| E-DMM68 | Cdkn2a <sup>+/+</sup> _C57 | SIN.LV.SF | LIVER  | 2 | 109161140 | - | NM_139303    | Kif18a        | + |
| E-DMM70 | Cdkn2a <sup>+/+</sup> _C57 | SIN.LV.SF | LIVER  | 2 | 113540074 | - | NM_001043322 | Fmn1          | + |
| E-DMM70 | Cdkn2a <sup>+/+</sup> _C57 | SIN.LV.SF | LIVER  | 2 | 120599631 | + | NM_001024856 | Ttbk2         | - |
| E-DMM70 | Cdkn2a <sup>+/+</sup> _C57 | SIN.LV.SF | LIVER  | 2 | 123536458 | - | NM_172537    | Sema6d        | + |
| E-DMM68 | Cdkn2a <sup>+/+</sup> _C57 | SIN.LV.SF | LIVER  | 2 | 134427220 | - | NM_029148    | Tmx4          | - |
| E-DMM70 | Cdkn2a <sup>+/+</sup> _C57 | SIN.LV.SF | LIVER  | 2 | 140031000 | - | NM_027093    | 2310003L22Rik | + |
| E-DMM70 | Cdkn2a <sup>+/+</sup> _C57 | SIN.LV.SF | LIVER  | 2 | 146882770 | - | NM_011917    | Xrn2          | + |
| E-DMM70 | Cdkn2a <sup>+/+</sup> _C57 | SIN.LV.SF | LIVER  | 2 | 159677754 | + | NM_001033411 | Gm826         | - |
| E-DMM70 | Cdkn2a <sup>+/+</sup> _C57 | SIN.LV.SF | LIVER  | 2 | 159677801 | + | NM_001033411 | Gm826         | - |
| E-DMM70 | Cdkn2a <sup>+/+</sup> _C57 | SIN.LV.SF | LIVER  | 2 | 163235704 | + | NM_025699    | 3230401D17Rik | - |
| E-DMM70 | Cdkn2a <sup>+/+</sup> _C57 | SIN.LV.SF | LIVER  | 2 | 168020998 | + | NM_009628    | Adnp          | - |
| E-DMM69 | Cdkn2a <sup>+/+</sup> _C57 | SIN.LV.SF | LIVER  | 3 | 7538919   | + | NM_173181    | Fam164a       | + |
| E-DMM70 | Cdkn2a <sup>+/+</sup> _C57 | SIN.LV.SF | LIVER  | 3 | 10413129  | + | NM_001127191 | Snx16         | - |
| E-DMM76 | Cdkn2a <sup>+/+</sup> _C57 | SIN.LV.SF | SPLEEN | 3 | 10425562  | - | NM_001127191 | Snx16         | - |
| E-DMM70 | Cdkn2a <sup>+/+</sup> _C57 | SIN.LV.SF | LIVER  | 3 | 10431272  | - | NM_001127191 | Snx16         | - |
| E-DMM70 | Cdkn2a <sup>+/+</sup> _C57 | SIN.LV.SF | LIVER  | 3 | 15820376  | - | NM_001081687 | Gm5150        | - |
| E-DMM70 | Cdkn2a <sup>+/+</sup> _C57 | SIN.LV.SF | LIVER  | 3 | 17179744  | + | NM_021560    | Bhlhe22       | + |
| E-DMM66 | Cdkn2a <sup>+/+</sup> _C57 | SIN.LV.SF | LIVER  | 3 | 18237256  | - | NM_007825    | Cyp7b1        | - |
| E-DMM70 | Cdkn2a <sup>+/+</sup> _C57 | SIN.LV.SF | LIVER  | 3 | 19144573  | + | NM_001122759 | Pde7a         | - |
| E-DMM66 | Cdkn2a <sup>+/+</sup> _C57 | SIN.LV.SF | LIVER  | 3 | 19773407  | - | NM_001042611 | Cp            | + |
| E-DMM70 | Cdkn2a <sup>+/+</sup> _C57 | SIN.LV.SF | LIVER  | 3 | 20549251  | - | NM_175086    | Agtr1b        | - |
| E-DMM70 | Cdkn2a <sup>+/+</sup> _C57 | SIN.LV.SF | LIVER  | 3 | 21820747  | - | NM_030732    | Tbl1xr1       | + |
| E-DMM70 | Cdkn2a <sup>+/+</sup> _C57 | SIN.LV.SF | LIVER  | 3 | 21939203  | - | NM_030732    | Tbl1xr1       | + |
| E-DMM70 | Cdkn2a <sup>+/+</sup> _C57 | SIN.LV.SF | LIVER  | 3 | 27712551  | - | NM_173182    | Fndc3b        | - |
| E-DMM76 | Cdkn2a <sup>+/+</sup> _C57 | SIN.LV.SF | SPLEEN | 3 | 29901076  | + | NM_007963    | Evi1          | - |
| E-DMM70 | Cdkn2a <sup>+/+</sup> _C57 | SIN.LV.SF | LIVER  | 3 | 36492528  | - | NM_027810    | Bbs7          | - |
| E-DMM70 | Cdkn2a <sup>+/+</sup> _C57 | SIN.LV.SF | LIVER  | 3 | 51241273  | + | NM_053089    | Narg1         | + |

|         |                            |           |        |   |           |   |              |               |   |
|---------|----------------------------|-----------|--------|---|-----------|---|--------------|---------------|---|
| E-DMM74 | Cdkn2a <sup>+/+</sup> _C57 | SIN.LV.SF | LIVER  | 3 | 54524326  | + | NM_019995    | Fam48a        | + |
| E-DMM74 | Cdkn2a <sup>+/+</sup> _C57 | SIN.LV.SF | LIVER  | 3 | 54524500  | - | NM_019995    | Fam48a        | + |
| E-DMM76 | Cdkn2a <sup>+/+</sup> _C57 | SIN.LV.SF | SPLEEN | 3 | 59094462  | - | NM_027571    | P2ry12        | - |
| E-DMM70 | Cdkn2a <sup>+/+</sup> _C57 | SIN.LV.SF | LIVER  | 3 | 60026427  | + | NM_032400    | Sucnr1        | + |
| E-DMM70 | Cdkn2a <sup>+/+</sup> _C57 | SIN.LV.SF | LIVER  | 3 | 60214593  | + | NM_020007    | Mbnl1         | + |
| E-DMM75 | Cdkn2a <sup>+/+</sup> _C57 | SIN.LV.SF | LIVER  | 3 | 60345624  | + | NM_020007    | Mbnl1         | + |
| E-DMM70 | Cdkn2a <sup>+/+</sup> _C57 | SIN.LV.SF | LIVER  | 3 | 61105556  | + | NM_028712    | Rap2b         | + |
| E-DMM70 | Cdkn2a <sup>+/+</sup> _C57 | SIN.LV.SF | LIVER  | 3 | 62194306  | - | NM_001081295 | 4631416L12Rik | + |
| E-DMM76 | Cdkn2a <sup>+/+</sup> _C57 | SIN.LV.SF | SPLEEN | 3 | 70617880  | + | NM_001018031 | Gm414         | + |
| E-DMM76 | Cdkn2a <sup>+/+</sup> _C57 | SIN.LV.SF | SPLEEN | 3 | 72171760  | - | NM_001081137 | 2010204N08Rik | - |
| E-DMM70 | Cdkn2a <sup>+/+</sup> _C57 | SIN.LV.SF | LIVER  | 3 | 78926814  | + | NM_001099624 | Rapgef2       | - |
| E-DMM70 | Cdkn2a <sup>+/+</sup> _C57 | SIN.LV.SF | LIVER  | 3 | 79329045  | + | NM_001142953 | LOC100233207  | + |
| E-DMM70 | Cdkn2a <sup>+/+</sup> _C57 | SIN.LV.SF | LIVER  | 3 | 79745468  | - | NM_133187    | 1110032E23Rik | + |
| E-DMM70 | Cdkn2a <sup>+/+</sup> _C57 | SIN.LV.SF | LIVER  | 3 | 80968278  | - | NM_019971    | Pdgfc         | + |
| E-DMM75 | Cdkn2a <sup>+/+</sup> _C57 | SIN.LV.SF | LIVER  | 3 | 82871012  | - | NM_016784    | Plrg1         | + |
| E-DMM68 | Cdkn2a <sup>+/+</sup> _C57 | SIN.LV.SF | LIVER  | 3 | 84747400  | + | NM_080428    | Fbxw7         | + |
| E-DMM70 | Cdkn2a <sup>+/+</sup> _C57 | SIN.LV.SF | LIVER  | 3 | 97845419  | - | NM_010928    | Notch2        | + |
| E-DMM76 | Cdkn2a <sup>+/+</sup> _C57 | SIN.LV.SF | SPLEEN | 3 | 101340982 | + | NM_144900    | Atp1a1        | - |
| E-DMM76 | Cdkn2a <sup>+/+</sup> _C57 | SIN.LV.SF | SPLEEN | 3 | 117857960 | + | NM_029655    | Snx7          | - |
| E-DMM70 | Cdkn2a <sup>+/+</sup> _C57 | SIN.LV.SF | LIVER  | 3 | 119451957 | + | NM_019550    | Ptbp2         | - |
| E-DMM76 | Cdkn2a <sup>+/+</sup> _C57 | SIN.LV.SF | SPLEEN | 3 | 132556292 | - | NM_001029836 | Npnt          | - |
| E-DMM70 | Cdkn2a <sup>+/+</sup> _C57 | SIN.LV.SF | LIVER  | 3 | 132770510 | - | NM_027927    | Ints12        | + |
| E-DMM74 | Cdkn2a <sup>+/+</sup> _C57 | SIN.LV.SF | LIVER  | 3 | 133143912 | + | NM_001040400 | Tet2          | - |
| E-DMM74 | Cdkn2a <sup>+/+</sup> _C57 | SIN.LV.SF | LIVER  | 3 | 133144236 | - | NM_001040400 | Tet2          | - |
| E-DMM70 | Cdkn2a <sup>+/+</sup> _C57 | SIN.LV.SF | LIVER  | 3 | 134879108 | - | NM_173762    | Cenpe         | + |
| E-DMM76 | Cdkn2a <sup>+/+</sup> _C57 | SIN.LV.SF | SPLEEN | 3 | 135718734 | - | NM_001033350 | Bank1         | - |
| E-DMM70 | Cdkn2a <sup>+/+</sup> _C57 | SIN.LV.SF | LIVER  | 3 | 137942039 | - | NM_007409    | Adh1          | + |
| E-DMM70 | Cdkn2a <sup>+/+</sup> _C57 | SIN.LV.SF | LIVER  | 3 | 138730329 | - | NM_001040690 | Rap1gds1      | - |
| E-DMM69 | Cdkn2a <sup>+/+</sup> _C57 | SIN.LV.SF | LIVER  | 3 | 141905556 | - | NM_019808    | Pdim5         | - |
| E-DMM66 | Cdkn2a <sup>+/+</sup> _C57 | SIN.LV.SF | LIVER  | 3 | 142528895 | - | NM_178654    | Pkn2          | - |
| E-DMM74 | Cdkn2a <sup>+/+</sup> _C57 | SIN.LV.SF | LIVER  | 3 | 144568537 | - | NM_001033199 | A1747448      | - |

|         |                            |           |        |   |           |   |              |               |   |
|---------|----------------------------|-----------|--------|---|-----------|---|--------------|---------------|---|
| E-DMM69 | Cdkn2a <sup>+/+</sup> _C57 | SIN.LV.SF | LIVER  | 3 | 157715892 | - | NM_024194    | Lrrc40        | + |
| E-DMM70 | Cdkn2a <sup>+/+</sup> _C57 | SIN.LV.SF | LIVER  | 4 | 8716632   | - | NM_001081417 | Chd7          | + |
| E-DMM75 | Cdkn2a <sup>+/+</sup> _C57 | SIN.LV.SF | LIVER  | 4 | 9671674   | + | NM_023066    | Asph          | - |
| E-DMM70 | Cdkn2a <sup>+/+</sup> _C57 | SIN.LV.SF | LIVER  | 4 | 19458265  | - | NM_027769    | Cpne3         | - |
| E-DMM70 | Cdkn2a <sup>+/+</sup> _C57 | SIN.LV.SF | LIVER  | 4 | 19709538  | - | NM_028746    | Slc7a13       | + |
| E-DMM75 | Cdkn2a <sup>+/+</sup> _C57 | SIN.LV.SF | LIVER  | 4 | 22337576  | - | NM_172988    | Fbxl4         | + |
| E-DMM70 | Cdkn2a <sup>+/+</sup> _C57 | SIN.LV.SF | LIVER  | 4 | 34016199  | + | NM_007726    | Cnr1          | + |
| E-DMM70 | Cdkn2a <sup>+/+</sup> _C57 | SIN.LV.SF | LIVER  | 4 | 37362289  | + | NM_175516    | Lingo2        | - |
| E-DMM70 | Cdkn2a <sup>+/+</sup> _C57 | SIN.LV.SF | LIVER  | 4 | 44169812  | + | NM_175201    | Rnf38         | - |
| E-DMM70 | Cdkn2a <sup>+/+</sup> _C57 | SIN.LV.SF | LIVER  | 4 | 49656256  | + | NM_182999    | Rnf20         | + |
| E-DMM70 | Cdkn2a <sup>+/+</sup> _C57 | SIN.LV.SF | LIVER  | 4 | 53873468  | + | NM_028053    | Tmem38b       | + |
| E-DMM70 | Cdkn2a <sup>+/+</sup> _C57 | SIN.LV.SF | LIVER  | 4 | 58503654  | - | NM_010336    | Lpar1         | - |
| E-DMM70 | Cdkn2a <sup>+/+</sup> _C57 | SIN.LV.SF | LIVER  | 4 | 66185506  | + | NM_019514    | Astn2         | - |
| E-DMM70 | Cdkn2a <sup>+/+</sup> _C57 | SIN.LV.SF | LIVER  | 4 | 69070812  | - | NM_019967    | Dbc1          | - |
| E-DMM70 | Cdkn2a <sup>+/+</sup> _C57 | SIN.LV.SF | LIVER  | 4 | 69896690  | + | NM_145990    | Cdk5rap2      | - |
| E-DMM70 | Cdkn2a <sup>+/+</sup> _C57 | SIN.LV.SF | LIVER  | 4 | 79976185  | - | NM_031202    | Tyrp1         | + |
| E-DMM70 | Cdkn2a <sup>+/+</sup> _C57 | SIN.LV.SF | LIVER  | 4 | 83261854  | - | NM_001081012 | 4930473A06Rik | + |
| E-DMM75 | Cdkn2a <sup>+/+</sup> _C57 | SIN.LV.SF | LIVER  | 4 | 94622034  | - | NM_177239    | Mysm1         | - |
| E-DMM70 | Cdkn2a <sup>+/+</sup> _C57 | SIN.LV.SF | LIVER  | 4 | 102203519 | + | NM_019840    | Pde4b         | + |
| E-DMM70 | Cdkn2a <sup>+/+</sup> _C57 | SIN.LV.SF | LIVER  | 4 | 104814654 | + | NM_080555    | Ppap2b        | + |
| E-DMM70 | Cdkn2a <sup>+/+</sup> _C57 | SIN.LV.SF | LIVER  | 4 | 108445248 | - | NM_027453    | Btf3l4        | - |
| E-DMM70 | Cdkn2a <sup>+/+</sup> _C57 | SIN.LV.SF | LIVER  | 4 | 120234155 | + | NM_016748    | Ctps          | - |
| E-DMM70 | Cdkn2a <sup>+/+</sup> _C57 | SIN.LV.SF | LIVER  | 4 | 120465291 | + | NM_008692    | Nfyc          | - |
| E-DMM70 | Cdkn2a <sup>+/+</sup> _C57 | SIN.LV.SF | LIVER  | 5 | 8678580   | - | NM_011076    | Abcb1a        | + |
| E-DMM70 | Cdkn2a <sup>+/+</sup> _C57 | SIN.LV.SF | LIVER  | 5 | 9134301   | + | NM_001110327 | Dmtf1         | - |
| E-DMM70 | Cdkn2a <sup>+/+</sup> _C57 | SIN.LV.SF | LIVER  | 5 | 9139601   | + | NM_001110327 | Dmtf1         | - |
| E-DMM70 | Cdkn2a <sup>+/+</sup> _C57 | SIN.LV.SF | LIVER  | 5 | 15983360  | - | NM_010427    | Hgf           | + |
| E-DMM66 | Cdkn2a <sup>+/+</sup> _C57 | SIN.LV.SF | LIVER  | 5 | 19758859  | - | NM_015823    | Magi2         | + |
| E-DMM70 | Cdkn2a <sup>+/+</sup> _C57 | SIN.LV.SF | LIVER  | 5 | 20337310  | - | NM_172992    | Phf2          | - |
| E-DMM70 | Cdkn2a <sup>+/+</sup> _C57 | SIN.LV.SF | LIVER  | 5 | 20518058  | - | NM_011203    | Ptpn12        | - |
| E-DMM76 | Cdkn2a <sup>+/+</sup> _C57 | SIN.LV.SF | SPLEEN | 5 | 29999792  | - | NM_133907    | Ube3c         | + |

|         |                            |           |        |   |           |   |              |          |   |
|---------|----------------------------|-----------|--------|---|-----------|---|--------------|----------|---|
| E-DMM70 | Cdkn2a <sup>+/+</sup> _C57 | SIN.LV.SF | LIVER  | 5 | 33718513  | - | NM_021500    | Maea     | + |
| E-DMM70 | Cdkn2a <sup>+/+</sup> _C57 | SIN.LV.SF | LIVER  | 5 | 46351681  | - | NM_178142    | Lcorl    | - |
| E-DMM70 | Cdkn2a <sup>+/+</sup> _C57 | SIN.LV.SF | LIVER  | 5 | 53161824  | + | NM_025951    | Pi4k2b   | + |
| E-DMM70 | Cdkn2a <sup>+/+</sup> _C57 | SIN.LV.SF | LIVER  | 5 | 58199754  | - | NM_001122758 | Pcdh7    | + |
| E-DMM70 | Cdkn2a <sup>+/+</sup> _C57 | SIN.LV.SF | LIVER  | 5 | 62232067  | + | NM_019468    | G6pd2    | + |
| E-DMM70 | Cdkn2a <sup>+/+</sup> _C57 | SIN.LV.SF | LIVER  | 5 | 62964540  | + | NM_178407    | Arap2    | - |
| E-DMM76 | Cdkn2a <sup>+/+</sup> _C57 | SIN.LV.SF | SPLEEN | 5 | 73146672  | - | NM_001113460 | Tec      | - |
| E-DMM76 | Cdkn2a <sup>+/+</sup> _C57 | SIN.LV.SF | SPLEEN | 5 | 80829422  | + | NM_198702    | Lphn3    | + |
| E-DMM70 | Cdkn2a <sup>+/+</sup> _C57 | SIN.LV.SF | LIVER  | 5 | 81821828  | + | NM_198702    | Lphn3    | + |
| E-DMM74 | Cdkn2a <sup>+/+</sup> _C57 | SIN.LV.SF | LIVER  | 5 | 88540820  | + | NM_021289    | Smr2     | + |
| E-DMM70 | Cdkn2a <sup>+/+</sup> _C57 | SIN.LV.SF | LIVER  | 5 | 89092223  | + | NM_001098476 | Grsf1    | - |
| E-DMM70 | Cdkn2a <sup>+/+</sup> _C57 | SIN.LV.SF | LIVER  | 5 | 90742792  | - | NM_030886    | Ankrd17  | - |
| E-DMM76 | Cdkn2a <sup>+/+</sup> _C57 | SIN.LV.SF | SPLEEN | 5 | 97815105  | + | NM_001033191 | Ard1b    | - |
| E-DMM70 | Cdkn2a <sup>+/+</sup> _C57 | SIN.LV.SF | LIVER  | 5 | 102388610 | - | NM_172882    | Wdfy3    | - |
| E-DMM68 | Cdkn2a <sup>+/+</sup> _C57 | SIN.LV.SF | LIVER  | 5 | 111296324 | + | NM_016681    | Chek2    | + |
| E-DMM75 | Cdkn2a <sup>+/+</sup> _C57 | SIN.LV.SF | LIVER  | 5 | 123830330 | - | NM_029850    | Bcl7a    | + |
| E-DMM70 | Cdkn2a <sup>+/+</sup> _C57 | SIN.LV.SF | LIVER  | 5 | 124771377 | - | NM_001081323 | Mphosph9 | - |
| E-DMM70 | Cdkn2a <sup>+/+</sup> _C57 | SIN.LV.SF | LIVER  | 5 | 130625662 | + | NM_172509    | Kctd7    | + |
| E-DMM70 | Cdkn2a <sup>+/+</sup> _C57 | SIN.LV.SF | LIVER  | 5 | 132929268 | + | NM_177047    | Auts2    | - |
| E-DMM70 | Cdkn2a <sup>+/+</sup> _C57 | SIN.LV.SF | LIVER  | 6 | 13034354  | + | NM_027992    | Tmem106b | + |
| E-DMM70 | Cdkn2a <sup>+/+</sup> _C57 | SIN.LV.SF | LIVER  | 6 | 15577866  | + | NM_175088    | Mdfic    | + |
| E-DMM70 | Cdkn2a <sup>+/+</sup> _C57 | SIN.LV.SF | LIVER  | 6 | 35470003  | - | NM_008098    | Mtpn     | - |
| E-DMM69 | Cdkn2a <sup>+/+</sup> _C57 | SIN.LV.SF | LIVER  | 6 | 38934738  | - | NM_011539    | Tbxas1   | + |
| E-DMM75 | Cdkn2a <sup>+/+</sup> _C57 | SIN.LV.SF | LIVER  | 6 | 39595134  | - | NM_139294    | Braf     | - |
| E-DMM70 | Cdkn2a <sup>+/+</sup> _C57 | SIN.LV.SF | LIVER  | 6 | 39595417  | - | NM_139294    | Braf     | - |
| E-DMM69 | Cdkn2a <sup>+/+</sup> _C57 | SIN.LV.SF | LIVER  | 6 | 39595591  | - | NM_139294    | Braf     | - |
| E-DMM69 | Cdkn2a <sup>+/+</sup> _C57 | SIN.LV.SF | LIVER  | 6 | 39595738  | - | NM_139294    | Braf     | - |
| E-DMM70 | Cdkn2a <sup>+/+</sup> _C57 | SIN.LV.SF | LIVER  | 6 | 46128181  | + | NM_001004357 | Cntnap2  | + |
| E-DMM70 | Cdkn2a <sup>+/+</sup> _C57 | SIN.LV.SF | LIVER  | 6 | 46403854  | - | NM_001004357 | Cntnap2  | + |
| E-DMM70 | Cdkn2a <sup>+/+</sup> _C57 | SIN.LV.SF | LIVER  | 6 | 53535810  | + | NM_172728    | Creb5    | + |
| E-DMM68 | Cdkn2a <sup>+/+</sup> _C57 | SIN.LV.SF | LIVER  | 6 | 56128247  | - | NM_001025568 | Pde1c    | - |

|         |                            |           |        |   |           |   |              |          |   |
|---------|----------------------------|-----------|--------|---|-----------|---|--------------|----------|---|
| E-DMM69 | Cdkn2a <sup>+/+</sup> _C57 | SIN.LV.SF | LIVER  | 6 | 58621992  | + | NM_011920    | Abcg2    | + |
| E-DMM70 | Cdkn2a <sup>+/+</sup> _C57 | SIN.LV.SF | LIVER  | 6 | 60759941  | - | NM_001042451 | Snca     | - |
| E-DMM70 | Cdkn2a <sup>+/+</sup> _C57 | SIN.LV.SF | LIVER  | 6 | 84770740  | + | NM_177077    | Exoc6b   | - |
| E-DMM75 | Cdkn2a <sup>+/+</sup> _C57 | SIN.LV.SF | LIVER  | 6 | 103292048 | - | NM_007697    | Chl1     | + |
| E-DMM70 | Cdkn2a <sup>+/+</sup> _C57 | SIN.LV.SF | LIVER  | 6 | 109981252 | + | NM_177328    | Grm7     | + |
| E-DMM70 | Cdkn2a <sup>+/+</sup> _C57 | SIN.LV.SF | LIVER  | 6 | 113080238 | - | NM_028385    | Setd5    | + |
| E-DMM70 | Cdkn2a <sup>+/+</sup> _C57 | SIN.LV.SF | LIVER  | 6 | 118501593 | + | NM_001081112 | Ankrd26  | - |
| E-DMM70 | Cdkn2a <sup>+/+</sup> _C57 | SIN.LV.SF | LIVER  | 6 | 119240615 | - | NM_001033382 | Cacna2d4 | + |
| E-DMM70 | Cdkn2a <sup>+/+</sup> _C57 | SIN.LV.SF | LIVER  | 6 | 119931504 | - | NM_198703    | Wnk1     | - |
| E-DMM75 | Cdkn2a <sup>+/+</sup> _C57 | SIN.LV.SF | LIVER  | 6 | 120344414 | + | NM_145997    | Kdm5a    | + |
| E-DMM70 | Cdkn2a <sup>+/+</sup> _C57 | SIN.LV.SF | LIVER  | 6 | 120349611 | + | NM_145997    | Kdm5a    | + |
| E-DMM70 | Cdkn2a <sup>+/+</sup> _C57 | SIN.LV.SF | LIVER  | 6 | 120349778 | - | NM_145997    | Kdm5a    | + |
| E-DMM70 | Cdkn2a <sup>+/+</sup> _C57 | SIN.LV.SF | LIVER  | 6 | 129170010 | + | NM_053109    | Clec2d   | + |
| E-DMM76 | Cdkn2a <sup>+/+</sup> _C57 | SIN.LV.SF | SPLEEN | 7 | 6251993   | + | NM_001024928 | Zfp667   | + |
| E-DMM70 | Cdkn2a <sup>+/+</sup> _C57 | SIN.LV.SF | LIVER  | 7 | 28238239  | - | NM_144923    | Blvrb    | + |
| E-DMM70 | Cdkn2a <sup>+/+</sup> _C57 | SIN.LV.SF | LIVER  | 7 | 29737734  | - | NM_021895    | Actn4    | - |
| E-DMM70 | Cdkn2a <sup>+/+</sup> _C57 | SIN.LV.SF | LIVER  | 7 | 66540195  | + | NM_173010    | Ube3a    | + |
| E-DMM70 | Cdkn2a <sup>+/+</sup> _C57 | SIN.LV.SF | LIVER  | 7 | 77630935  | - | NM_183261    | Nr2f2    | - |
| E-DMM70 | Cdkn2a <sup>+/+</sup> _C57 | SIN.LV.SF | LIVER  | 7 | 87443715  | - | NM_145150    | Prcl     | + |
| E-DMM68 | Cdkn2a <sup>+/+</sup> _C57 | SIN.LV.SF | LIVER  | 7 | 89089547  | - | NM_013886    | Hdgfrp3  | - |
| E-DMM70 | Cdkn2a <sup>+/+</sup> _C57 | SIN.LV.SF | LIVER  | 7 | 97314238  | + | NM_146194    | Picalm   | + |
| E-DMM70 | Cdkn2a <sup>+/+</sup> _C57 | SIN.LV.SF | LIVER  | 7 | 97322824  | + | NM_146194    | Picalm   | + |
| E-DMM68 | Cdkn2a <sup>+/+</sup> _C57 | SIN.LV.SF | LIVER  | 7 | 99809795  | - | NM_029078    | Pcf11    | - |
| E-DMM70 | Cdkn2a <sup>+/+</sup> _C57 | SIN.LV.SF | LIVER  | 7 | 101456180 | - | NM_021427    | Fam181b  | + |
| E-DMM70 | Cdkn2a <sup>+/+</sup> _C57 | SIN.LV.SF | LIVER  | 7 | 105432033 | - | NM_025408    | Acer3    | - |
| E-DMM70 | Cdkn2a <sup>+/+</sup> _C57 | SIN.LV.SF | LIVER  | 7 | 107775756 | + | NM_024287    | Rab6     | + |
| E-DMM70 | Cdkn2a <sup>+/+</sup> _C57 | SIN.LV.SF | LIVER  | 7 | 110902638 | + | NM_147098    | Olfrc30  | - |
| E-DMM70 | Cdkn2a <sup>+/+</sup> _C57 | SIN.LV.SF | LIVER  | 7 | 110919697 | + | NM_013621    | Olfrc69  | - |
| E-DMM68 | Cdkn2a <sup>+/+</sup> _C57 | SIN.LV.SF | LIVER  | 7 | 111543765 | + | NM_009099    | Trim30   | - |
| E-DMM68 | Cdkn2a <sup>+/+</sup> _C57 | SIN.LV.SF | LIVER  | 7 | 114656452 | + | NM_021889    | Syt9     | + |
| E-DMM74 | Cdkn2a <sup>+/+</sup> _C57 | SIN.LV.SF | LIVER  | 7 | 117678412 | + | NM_009627    | Adm      | + |

|         |                            |           |        |   |           |   |              |               |   |
|---------|----------------------------|-----------|--------|---|-----------|---|--------------|---------------|---|
| E-DMM68 | Cdkn2a <sup>+/+</sup> _C57 | SIN.LV.SF | LIVER  | 7 | 120474470 | - | NM_133700    | Btbd10        | - |
| E-DMM70 | Cdkn2a <sup>+/+</sup> _C57 | SIN.LV.SF | LIVER  | 7 | 130306228 | - | NM_144925    | Tnrc6a        | + |
| E-DMM75 | Cdkn2a <sup>+/+</sup> _C57 | SIN.LV.SF | LIVER  | 7 | 132843629 | + | NM_207239    | Gtf3c1        | - |
| E-DMM74 | Cdkn2a <sup>+/+</sup> _C57 | SIN.LV.SF | LIVER  | 7 | 135129797 | + | NM_139149    | Fus           | + |
| E-DMM68 | Cdkn2a <sup>+/+</sup> _C57 | SIN.LV.SF | LIVER  | 7 | 135591892 | - | NM_009383    | Tial1         | - |
| E-DMM76 | Cdkn2a <sup>+/+</sup> _C57 | SIN.LV.SF | SPLEEN | 7 | 147299660 | + | NM_053119    | Echs1         | - |
| E-DMM68 | Cdkn2a <sup>+/+</sup> _C57 | SIN.LV.SF | LIVER  | 7 | 152279944 | - | NM_007631    | Ccnd1         | - |
| E-DMM70 | Cdkn2a <sup>+/+</sup> _C57 | SIN.LV.SF | LIVER  | 8 | 26755526  | - | NM_001081269 | Whsc111       | + |
| E-DMM70 | Cdkn2a <sup>+/+</sup> _C57 | SIN.LV.SF | LIVER  | 8 | 27182953  | - | NM_207659    | Hook3         | - |
| E-DMM75 | Cdkn2a <sup>+/+</sup> _C57 | SIN.LV.SF | LIVER  | 8 | 34782856  | + | NM_010344    | Gsr           | + |
| E-DMM70 | Cdkn2a <sup>+/+</sup> _C57 | SIN.LV.SF | LIVER  | 8 | 41586126  | + | NM_011135    | Cnot7         | - |
| E-DMM69 | Cdkn2a <sup>+/+</sup> _C57 | SIN.LV.SF | LIVER  | 8 | 42339313  | + | NM_023662    | Pcm1          | + |
| E-DMM70 | Cdkn2a <sup>+/+</sup> _C57 | SIN.LV.SF | LIVER  | 8 | 47676047  | - | NM_001001184 | Ccdc111       | - |
| E-DMM70 | Cdkn2a <sup>+/+</sup> _C57 | SIN.LV.SF | LIVER  | 8 | 54692055  | - | NM_146208    | Neil3         | - |
| E-DMM70 | Cdkn2a <sup>+/+</sup> _C57 | SIN.LV.SF | LIVER  | 8 | 58547518  | - | NM_080438    | Glra3         | + |
| E-DMM70 | Cdkn2a <sup>+/+</sup> _C57 | SIN.LV.SF | LIVER  | 8 | 58609115  | + | NM_080438    | Glra3         | + |
| E-DMM76 | Cdkn2a <sup>+/+</sup> _C57 | SIN.LV.SF | SPLEEN | 8 | 64437418  | - | NM_001081215 | Ddx60         | + |
| E-DMM70 | Cdkn2a <sup>+/+</sup> _C57 | SIN.LV.SF | LIVER  | 8 | 70413918  | + | NM_030263    | Psd3          | - |
| E-DMM70 | Cdkn2a <sup>+/+</sup> _C57 | SIN.LV.SF | LIVER  | 8 | 75423814  | + | NM_010687    | Large         | - |
| E-DMM70 | Cdkn2a <sup>+/+</sup> _C57 | SIN.LV.SF | LIVER  | 8 | 80003700  | - | NM_030113    | Arhgap10      | - |
| E-DMM70 | Cdkn2a <sup>+/+</sup> _C57 | SIN.LV.SF | LIVER  | 8 | 83517982  | + | NM_027554    | Usp38         | - |
| E-DMM70 | Cdkn2a <sup>+/+</sup> _C57 | SIN.LV.SF | LIVER  | 8 | 91800110  | - | NM_021390    | Sall1         | - |
| E-DMM68 | Cdkn2a <sup>+/+</sup> _C57 | SIN.LV.SF | LIVER  | 8 | 109830220 | + | NM_018823    | Nfat5         | + |
| E-DMM70 | Cdkn2a <sup>+/+</sup> _C57 | SIN.LV.SF | LIVER  | 8 | 114936575 | + | NM_130457    | Cntnap4       | + |
| E-DMM70 | Cdkn2a <sup>+/+</sup> _C57 | SIN.LV.SF | LIVER  | 8 | 117928687 | - | NM_019573    | Wwox          | + |
| E-DMM70 | Cdkn2a <sup>+/+</sup> _C57 | SIN.LV.SF | LIVER  | 8 | 118086616 | + | NM_001025577 | Maf           | - |
| E-DMM76 | Cdkn2a <sup>+/+</sup> _C57 | SIN.LV.SF | SPLEEN | 8 | 119429149 | - | NM_026844    | 2310061C15Rik | - |
| E-DMM70 | Cdkn2a <sup>+/+</sup> _C57 | SIN.LV.SF | LIVER  | 9 | 9011432   | + | NM_027823    | 9030420J04Rik | - |
| E-DMM70 | Cdkn2a <sup>+/+</sup> _C57 | SIN.LV.SF | LIVER  | 9 | 13292591  | - | NM_001013813 | Maml2         | + |
| E-DMM70 | Cdkn2a <sup>+/+</sup> _C57 | SIN.LV.SF | LIVER  | 9 | 15925957  | - | NM_001080814 | Fat3          | - |
| E-DMM70 | Cdkn2a <sup>+/+</sup> _C57 | SIN.LV.SF | LIVER  | 9 | 19434869  | + | NM_172918    | Zfp317        | + |

|         |                            |           |        |    |           |   |              |               |   |
|---------|----------------------------|-----------|--------|----|-----------|---|--------------|---------------|---|
| E-DMM70 | Cdkn2a <sup>+/+</sup> _C57 | SIN.LV.SF | LIVER  | 9  | 32726497  | - | NM_001038642 | Ets1          | + |
| E-DMM70 | Cdkn2a <sup>+/+</sup> _C57 | SIN.LV.SF | LIVER  | 9  | 37115297  | - | NM_001081429 | Ccde15        | - |
| E-DMM68 | Cdkn2a <sup>+/+</sup> _C57 | SIN.LV.SF | LIVER  | 9  | 37298984  | + | NM_146222    | BC024479      | + |
| E-DMM68 | Cdkn2a <sup>+/+</sup> _C57 | SIN.LV.SF | LIVER  | 9  | 37299047  | - | NM_146222    | BC024479      | + |
| E-DMM68 | Cdkn2a <sup>+/+</sup> _C57 | SIN.LV.SF | LIVER  | 9  | 37299381  | - | NM_146222    | BC024479      | + |
| E-DMM70 | Cdkn2a <sup>+/+</sup> _C57 | SIN.LV.SF | LIVER  | 9  | 37302648  | + | NM_146222    | BC024479      | + |
| E-DMM70 | Cdkn2a <sup>+/+</sup> _C57 | SIN.LV.SF | LIVER  | 9  | 40158094  | + | NM_172768    | Gramd1b       | - |
| E-DMM75 | Cdkn2a <sup>+/+</sup> _C57 | SIN.LV.SF | LIVER  | 9  | 48878067  | - | NM_012039    | Zw10          | + |
| E-DMM70 | Cdkn2a <sup>+/+</sup> _C57 | SIN.LV.SF | LIVER  | 9  | 52316012  | + | NM_178906    | Al593442      | - |
| E-DMM70 | Cdkn2a <sup>+/+</sup> _C57 | SIN.LV.SF | LIVER  | 9  | 53378025  | - | NM_001081152 | Npat          | + |
| E-DMM70 | Cdkn2a <sup>+/+</sup> _C57 | SIN.LV.SF | LIVER  | 9  | 59281336  | + | NM_019927    | Arih1         | - |
| E-DMM76 | Cdkn2a <sup>+/+</sup> _C57 | SIN.LV.SF | SPLEEN | 9  | 63239729  | - | NM_027090    | 2300009A05Rik | - |
| E-DMM70 | Cdkn2a <sup>+/+</sup> _C57 | SIN.LV.SF | LIVER  | 9  | 89869424  | - | NM_011245    | Rasgrf1       | + |
| E-DMM76 | Cdkn2a <sup>+/+</sup> _C57 | SIN.LV.SF | SPLEEN | 9  | 95436956  | + | NM_198414    | Paqr9         | + |
| E-DMM70 | Cdkn2a <sup>+/+</sup> _C57 | SIN.LV.SF | LIVER  | 9  | 99315130  | + | NM_008624    | Mras          | - |
| E-DMM70 | Cdkn2a <sup>+/+</sup> _C57 | SIN.LV.SF | LIVER  | 9  | 111023576 | - | NM_027742    | Lrrfip2       | + |
| E-DMM70 | Cdkn2a <sup>+/+</sup> _C57 | SIN.LV.SF | LIVER  | 9  | 113848579 | - | NM_001083319 | Ubp1          | + |
| E-DMM70 | Cdkn2a <sup>+/+</sup> _C57 | SIN.LV.SF | LIVER  | 10 | 10100141  | - | NM_001127353 | 9130014G24Rik | - |
| E-DMM75 | Cdkn2a <sup>+/+</sup> _C57 | SIN.LV.SF | LIVER  | 10 | 21035809  | - | NM_001042593 | Hbs11         | + |
| E-DMM70 | Cdkn2a <sup>+/+</sup> _C57 | SIN.LV.SF | LIVER  | 10 | 24603554  | - | NM_027347    | Med23         | + |
| E-DMM76 | Cdkn2a <sup>+/+</sup> _C57 | SIN.LV.SF | SPLEEN | 10 | 33781224  | + | NM_001081165 | Fam26d        | - |
| E-DMM70 | Cdkn2a <sup>+/+</sup> _C57 | SIN.LV.SF | LIVER  | 10 | 34584258  | + | NM_001159544 | Frk           | + |
| E-DMM70 | Cdkn2a <sup>+/+</sup> _C57 | SIN.LV.SF | LIVER  | 10 | 39388646  | - | NM_134000    | Traf3ip2      | + |
| E-DMM70 | Cdkn2a <sup>+/+</sup> _C57 | SIN.LV.SF | LIVER  | 10 | 50677768  | - | NM_011376    | Sim1          | + |
| E-DMM70 | Cdkn2a <sup>+/+</sup> _C57 | SIN.LV.SF | LIVER  | 10 | 57367237  | + | NM_001039052 | Pkib          | + |
| E-DMM70 | Cdkn2a <sup>+/+</sup> _C57 | SIN.LV.SF | LIVER  | 10 | 59098736  | + | NM_001033259 | Ccdc109a      | - |
| E-DMM70 | Cdkn2a <sup>+/+</sup> _C57 | SIN.LV.SF | LIVER  | 10 | 59210295  | - | NM_144822    | Cbara1        | + |
| E-DMM70 | Cdkn2a <sup>+/+</sup> _C57 | SIN.LV.SF | LIVER  | 10 | 62791325  | - | NM_001159589 | Sirt1         | - |
| E-DMM70 | Cdkn2a <sup>+/+</sup> _C57 | SIN.LV.SF | LIVER  | 10 | 67683807  | - | NM_023598    | Arid5b        | - |
| E-DMM70 | Cdkn2a <sup>+/+</sup> _C57 | SIN.LV.SF | LIVER  | 10 | 86518022  | - | NM_138673    | Stab2         | - |
| E-DMM70 | Cdkn2a <sup>+/+</sup> _C57 | SIN.LV.SF | LIVER  | 10 | 87618881  | - | NM_028334    | Nup37         | + |



|         |                            |           |        |    |           |   |              |          |   |
|---------|----------------------------|-----------|--------|----|-----------|---|--------------|----------|---|
| E-DMM70 | Cdkn2a <sup>+/+</sup> _C57 | SIN.LV.SF | LIVER  | 10 | 90458014  | + | NM_001042558 | Apaf1    | - |
| E-DMM70 | Cdkn2a <sup>+/+</sup> _C57 | SIN.LV.SF | LIVER  | 10 | 92825328  | + | NM_013508    | Elk3     | - |
| E-DMM66 | Cdkn2a <sup>+/+</sup> _C57 | SIN.LV.SF | LIVER  | 10 | 95463283  | - | NM_001001932 | Eea1     | + |
| E-DMM69 | Cdkn2a <sup>+/+</sup> _C57 | SIN.LV.SF | LIVER  | 10 | 104486972 | - | NM_177368    | Tmtc2    | - |
| E-DMM69 | Cdkn2a <sup>+/+</sup> _C57 | SIN.LV.SF | LIVER  | 10 | 107610506 | - | NM_027892    | Ppp1r12a | + |
| E-DMM70 | Cdkn2a <sup>+/+</sup> _C57 | SIN.LV.SF | LIVER  | 10 | 110672705 | + | NM_001003717 | Osbp18   | + |
| E-DMM74 | Cdkn2a <sup>+/+</sup> _C57 | SIN.LV.SF | LIVER  | 10 | 111261785 | + | NM_178610    | Krr1     | + |
| E-DMM74 | Cdkn2a <sup>+/+</sup> _C57 | SIN.LV.SF | LIVER  | 10 | 111261875 | + | NM_178610    | Krr1     | + |
| E-DMM70 | Cdkn2a <sup>+/+</sup> _C57 | SIN.LV.SF | LIVER  | 10 | 115247098 | - | NM_146010    | Tspan8   | + |
| E-DMM70 | Cdkn2a <sup>+/+</sup> _C57 | SIN.LV.SF | LIVER  | 10 | 117232258 | - | NM_134010    | Nup107   | - |
| E-DMM70 | Cdkn2a <sup>+/+</sup> _C57 | SIN.LV.SF | LIVER  | 10 | 117417352 | + | NM_024457    | Rap1b    | - |
| E-DMM70 | Cdkn2a <sup>+/+</sup> _C57 | SIN.LV.SF | LIVER  | 10 | 120905106 | + | NM_138956    | Rassf3   | - |
| E-DMM70 | Cdkn2a <sup>+/+</sup> _C57 | SIN.LV.SF | LIVER  | 10 | 125165986 | + | NM_177152    | Lrig3    | + |
| E-DMM68 | Cdkn2a <sup>+/+</sup> _C57 | SIN.LV.SF | LIVER  | 11 | 3065657   | + | NM_030207    | Sfi1     | - |
| E-DMM70 | Cdkn2a <sup>+/+</sup> _C57 | SIN.LV.SF | LIVER  | 11 | 3078861   | - | NM_030207    | Sfi1     | - |
| E-DMM70 | Cdkn2a <sup>+/+</sup> _C57 | SIN.LV.SF | LIVER  | 11 | 16400899  | + | NM_001109971 | Sec61g   | - |
| E-DMM70 | Cdkn2a <sup>+/+</sup> _C57 | SIN.LV.SF | LIVER  | 11 | 16890057  | - | NM_019549    | Plek     | - |
| E-DMM70 | Cdkn2a <sup>+/+</sup> _C57 | SIN.LV.SF | LIVER  | 11 | 17081783  | + | NM_024459    | Ppp3r1   | + |
| E-DMM70 | Cdkn2a <sup>+/+</sup> _C57 | SIN.LV.SF | LIVER  | 11 | 17163186  | - | NM_020558    | C1d      | + |
| E-DMM70 | Cdkn2a <sup>+/+</sup> _C57 | SIN.LV.SF | LIVER  | 11 | 17836922  | + | NM_026576    | Etaa1    | - |
| E-DMM70 | Cdkn2a <sup>+/+</sup> _C57 | SIN.LV.SF | LIVER  | 11 | 23375724  | + | NM_172391    | Ahsa2    | - |
| E-DMM75 | Cdkn2a <sup>+/+</sup> _C57 | SIN.LV.SF | LIVER  | 11 | 26368101  | - | NM_025923    | Fanc1    | + |
| E-DMM69 | Cdkn2a <sup>+/+</sup> _C57 | SIN.LV.SF | LIVER  | 11 | 29538963  | - | NM_194052    | Rtn4     | + |
| E-DMM76 | Cdkn2a <sup>+/+</sup> _C57 | SIN.LV.SF | SPLEEN | 11 | 30709221  | - | NM_134013    | Psme4    | + |
| E-DMM76 | Cdkn2a <sup>+/+</sup> _C57 | SIN.LV.SF | SPLEEN | 11 | 40194307  | - | NM_134017    | Mat2b    | - |
| E-DMM70 | Cdkn2a <sup>+/+</sup> _C57 | SIN.LV.SF | LIVER  | 11 | 49029314  | - | NM_001024846 | Zfp62    | + |
| E-DMM70 | Cdkn2a <sup>+/+</sup> _C57 | SIN.LV.SF | LIVER  | 11 | 58007936  | - | NM_001135115 | Gml2250  | + |
| E-DMM68 | Cdkn2a <sup>+/+</sup> _C57 | SIN.LV.SF | LIVER  | 11 | 84674108  | - | NM_153144    | Ggnbp2   | - |
| E-DMM70 | Cdkn2a <sup>+/+</sup> _C57 | SIN.LV.SF | LIVER  | 11 | 100186623 | - | NM_011508    | Eif1     | + |
| E-DMM70 | Cdkn2a <sup>+/+</sup> _C57 | SIN.LV.SF | LIVER  | 11 | 105976515 | - | NM_011947    | Map3k3   | + |
| E-DMM70 | Cdkn2a <sup>+/+</sup> _C57 | SIN.LV.SF | LIVER  | 11 | 110025891 | + | NM_147220    | Abca9    | - |

|         |                            |           |        |    |           |   |              |               |   |
|---------|----------------------------|-----------|--------|----|-----------|---|--------------|---------------|---|
| E-DMM70 | Cdkn2a <sup>+/+</sup> _C57 | SIN.LV.SF | LIVER  | 12 | 11452548  | - | NM_012038    | Vsnl1         | - |
| E-DMM70 | Cdkn2a <sup>+/+</sup> _C57 | SIN.LV.SF | LIVER  | 12 | 21279792  | - | NM_008403    | Itgb1bp1      | - |
| E-DMM70 | Cdkn2a <sup>+/+</sup> _C57 | SIN.LV.SF | LIVER  | 12 | 21415820  | - | NM_011739    | Ywhaq         | - |
| E-DMM70 | Cdkn2a <sup>+/+</sup> _C57 | SIN.LV.SF | LIVER  | 12 | 35229511  | - | NM_024124    | Hdac9         | - |
| E-DMM68 | Cdkn2a <sup>+/+</sup> _C57 | SIN.LV.SF | LIVER  | 12 | 38080184  | + | NM_178767    | Tmem195       | + |
| E-DMM70 | Cdkn2a <sup>+/+</sup> _C57 | SIN.LV.SF | LIVER  | 12 | 41301186  | - | NM_172803    | Dock4         | + |
| E-DMM70 | Cdkn2a <sup>+/+</sup> _C57 | SIN.LV.SF | LIVER  | 12 | 41562925  | - | NM_172803    | Dock4         | + |
| E-DMM70 | Cdkn2a <sup>+/+</sup> _C57 | SIN.LV.SF | LIVER  | 12 | 42174436  | - | NM_053122    | Immp2l        | + |
| E-DMM76 | Cdkn2a <sup>+/+</sup> _C57 | SIN.LV.SF | SPLEEN | 12 | 51483209  | + | NM_008858    | Prkd1         | - |
| E-DMM70 | Cdkn2a <sup>+/+</sup> _C57 | SIN.LV.SF | LIVER  | 12 | 70275576  | + | NM_001081406 | Ppil5         | + |
| E-DMM76 | Cdkn2a <sup>+/+</sup> _C57 | SIN.LV.SF | SPLEEN | 12 | 73483779  | - | NM_153457    | Rtn1          | - |
| E-DMM75 | Cdkn2a <sup>+/+</sup> _C57 | SIN.LV.SF | LIVER  | 12 | 75019950  | + | NM_010431    | Hif1a         | + |
| E-DMM76 | Cdkn2a <sup>+/+</sup> _C57 | SIN.LV.SF | SPLEEN | 12 | 81461964  | - | NM_177267    | Wdr22         | - |
| E-DMM70 | Cdkn2a <sup>+/+</sup> _C57 | SIN.LV.SF | LIVER  | 12 | 85789137  | - | NM_134042    | Aldh6a1       | - |
| E-DMM70 | Cdkn2a <sup>+/+</sup> _C57 | SIN.LV.SF | LIVER  | 12 | 92504799  | - | NM_181815    | 4930534B04Rik | - |
| E-DMM70 | Cdkn2a <sup>+/+</sup> _C57 | SIN.LV.SF | LIVER  | 12 | 94450701  | + | NM_001039089 | Sel1l         | - |
| E-DMM75 | Cdkn2a <sup>+/+</sup> _C57 | SIN.LV.SF | LIVER  | 12 | 101935585 | + | NM_153587    | Rps6ka5       | - |
| E-DMM76 | Cdkn2a <sup>+/+</sup> _C57 | SIN.LV.SF | SPLEEN | 12 | 117653264 | - | NM_133762    | Ncapg2        | + |
| E-DMM70 | Cdkn2a <sup>+/+</sup> _C57 | SIN.LV.SF | LIVER  | 12 | 118870000 | + | NM_175930    | Rapgef5       | + |
| E-DMM70 | Cdkn2a <sup>+/+</sup> _C57 | SIN.LV.SF | LIVER  | 12 | 120430725 | + | NM_177290    | Itgb8         | - |
| E-DMM70 | Cdkn2a <sup>+/+</sup> _C57 | SIN.LV.SF | LIVER  | 13 | 3606418   | - | NM_134063    | BC016423      | - |
| E-DMM75 | Cdkn2a <sup>+/+</sup> _C57 | SIN.LV.SF | LIVER  | 13 | 18038092  | - | NM_019491    | Rala          | - |
| E-DMM70 | Cdkn2a <sup>+/+</sup> _C57 | SIN.LV.SF | LIVER  | 13 | 18853201  | + | NM_172120    | Vps4l         | + |
| E-DMM70 | Cdkn2a <sup>+/+</sup> _C57 | SIN.LV.SF | LIVER  | 13 | 20992179  | - | NM_012054    | Aoah          | + |
| E-DMM74 | Cdkn2a <sup>+/+</sup> _C57 | SIN.LV.SF | LIVER  | 13 | 26906692  | - | NM_008232    | Hdgfl1        | - |
| E-DMM70 | Cdkn2a <sup>+/+</sup> _C57 | SIN.LV.SF | LIVER  | 13 | 29790852  | + | NM_144536    | Cdkal1        | - |
| E-DMM70 | Cdkn2a <sup>+/+</sup> _C57 | SIN.LV.SF | LIVER  | 13 | 67057842  | - | NM_008959    | Ptdss1        | + |
| E-DMM76 | Cdkn2a <sup>+/+</sup> _C57 | SIN.LV.SF | SPLEEN | 13 | 67148655  | - | NM_001012325 | Zfp708        | - |
| E-DMM70 | Cdkn2a <sup>+/+</sup> _C57 | SIN.LV.SF | LIVER  | 13 | 70765747  | - | NM_172053    | Adamts16      | - |
| E-DMM75 | Cdkn2a <sup>+/+</sup> _C57 | SIN.LV.SF | LIVER  | 13 | 77578282  | + | NM_001145676 | 2210408I21Rik | + |
| E-DMM68 | Cdkn2a <sup>+/+</sup> _C57 | SIN.LV.SF | LIVER  | 13 | 82300114  | + | NM_007684    | Cetn3         | + |

|         |                            |           |        |    |           |   |              |               |   |
|---------|----------------------------|-----------|--------|----|-----------|---|--------------|---------------|---|
| E-DMM70 | Cdkn2a <sup>+/+</sup> _C57 | SIN.LV.SF | LIVER  | 13 | 84375997  | + | NM_175187    | Tmem161b      | + |
| E-DMM70 | Cdkn2a <sup>+/+</sup> _C57 | SIN.LV.SF | LIVER  | 13 | 90086719  | + | NM_028012    | Xrcc4         | - |
| E-DMM70 | Cdkn2a <sup>+/+</sup> _C57 | SIN.LV.SF | LIVER  | 13 | 91341833  | - | NM_025770    | Atg10         | - |
| E-DMM66 | Cdkn2a <sup>+/+</sup> _C57 | SIN.LV.SF | LIVER  | 13 | 95762887  | - | NM_172590    | Wdr41         | + |
| E-DMM70 | Cdkn2a <sup>+/+</sup> _C57 | SIN.LV.SF | LIVER  | 13 | 99537561  | - | NM_172591    | Fcho2         | - |
| E-DMM75 | Cdkn2a <sup>+/+</sup> _C57 | SIN.LV.SF | LIVER  | 13 | 104554203 | + | NM_172592    | Sfrs12        | - |
| E-DMM70 | Cdkn2a <sup>+/+</sup> _C57 | SIN.LV.SF | LIVER  | 13 | 105552596 | - | NM_026072    | Sdccag10      | - |
| E-DMM68 | Cdkn2a <sup>+/+</sup> _C57 | SIN.LV.SF | LIVER  | 13 | 106092958 | - | NM_027934    | Rnf180        | - |
| E-DMM74 | Cdkn2a <sup>+/+</sup> _C57 | SIN.LV.SF | LIVER  | 13 | 112276831 | + | NM_001122963 | Gbp1          | - |
| E-DMM70 | Cdkn2a <sup>+/+</sup> _C57 | SIN.LV.SF | LIVER  | 13 | 114267710 | + | NM_130796    | Snx18         | - |
| E-DMM70 | Cdkn2a <sup>+/+</sup> _C57 | SIN.LV.SF | LIVER  | 13 | 115988514 | - | NM_001033228 | Itga1         | - |
| E-DMM70 | Cdkn2a <sup>+/+</sup> _C57 | SIN.LV.SF | LIVER  | 13 | 117786607 | + | NM_001081009 | Parp8         | - |
| E-DMM70 | Cdkn2a <sup>+/+</sup> _C57 | SIN.LV.SF | LIVER  | 13 | 117786671 | - | NM_001081009 | Parp8         | - |
| E-DMM70 | Cdkn2a <sup>+/+</sup> _C57 | SIN.LV.SF | LIVER  | 14 | 15610711  | - | NM_001033270 | Slc4a7        | + |
| E-DMM70 | Cdkn2a <sup>+/+</sup> _C57 | SIN.LV.SF | LIVER  | 14 | 17241442  | - | NM_009409    | Top2b         | + |
| E-DMM70 | Cdkn2a <sup>+/+</sup> _C57 | SIN.LV.SF | LIVER  | 14 | 25698293  | - | NM_011297    | Rps24         | + |
| E-DMM70 | Cdkn2a <sup>+/+</sup> _C57 | SIN.LV.SF | LIVER  | 14 | 27485469  | - | NM_178668    | E430028B21Rik | - |
| E-DMM70 | Cdkn2a <sup>+/+</sup> _C57 | SIN.LV.SF | LIVER  | 14 | 31551986  | - | NM_019460    | Sfmbt1        | + |
| E-DMM76 | Cdkn2a <sup>+/+</sup> _C57 | SIN.LV.SF | SPLEEN | 14 | 45828247  | + | NM_172597    | Txndc16       | - |
| E-DMM66 | Cdkn2a <sup>+/+</sup> _C57 | SIN.LV.SF | LIVER  | 14 | 47882475  | - | NM_172598    | Wdhd1         | - |
| E-DMM75 | Cdkn2a <sup>+/+</sup> _C57 | SIN.LV.SF | LIVER  | 14 | 52808627  | + | NM_033618    | Supt16h       | - |
| E-DMM76 | Cdkn2a <sup>+/+</sup> _C57 | SIN.LV.SF | SPLEEN | 14 | 60021747  | + | NM_001081024 | Setdb2        | - |
| E-DMM70 | Cdkn2a <sup>+/+</sup> _C57 | SIN.LV.SF | LIVER  | 14 | 79314799  | - | NM_027906    | 1300010F03Rik | + |
| E-DMM70 | Cdkn2a <sup>+/+</sup> _C57 | SIN.LV.SF | LIVER  | 14 | 79768049  | - | NM_025832    | Narg1l        | - |
| E-DMM76 | Cdkn2a <sup>+/+</sup> _C57 | SIN.LV.SF | SPLEEN | 14 | 79977690  | + | NM_007920    | Elf1          | + |
| E-DMM76 | Cdkn2a <sup>+/+</sup> _C57 | SIN.LV.SF | SPLEEN | 14 | 87798982  | + | NM_172605    | Tdrd3         | + |
| E-DMM70 | Cdkn2a <sup>+/+</sup> _C57 | SIN.LV.SF | LIVER  | 14 | 110069995 | + | NM_199065    | Slitrk1       | - |
| E-DMM70 | Cdkn2a <sup>+/+</sup> _C57 | SIN.LV.SF | LIVER  | 14 | 115233919 | + | NM_175500    | Gpc5          | + |
| E-DMM70 | Cdkn2a <sup>+/+</sup> _C57 | SIN.LV.SF | LIVER  | 14 | 115582535 | + | NM_175500    | Gpc5          | + |
| E-DMM68 | Cdkn2a <sup>+/+</sup> _C57 | SIN.LV.SF | LIVER  | 14 | 122998022 | - | NM_144844    | Pcca          | + |
| E-DMM70 | Cdkn2a <sup>+/+</sup> _C57 | SIN.LV.SF | LIVER  | 15 | 9091225   | + | NM_177178    | Lmbrd2        | + |

|         |                            |           |        |    |          |   |              |               |   |
|---------|----------------------------|-----------|--------|----|----------|---|--------------|---------------|---|
| E-DMM70 | Cdkn2a <sup>+/+</sup> _C57 | SIN.LV.SF | LIVER  | 15 | 17530895 | - | NM_009869    | Cdh9          | + |
| E-DMM74 | Cdkn2a <sup>+/+</sup> _C57 | SIN.LV.SF | LIVER  | 15 | 19801562 | - | NM_022816    | Acot10        | - |
| E-DMM74 | Cdkn2a <sup>+/+</sup> _C57 | SIN.LV.SF | LIVER  | 15 | 29071380 | + | NM_133365    | Dnahc5        | + |
| E-DMM70 | Cdkn2a <sup>+/+</sup> _C57 | SIN.LV.SF | LIVER  | 15 | 34069019 | - | NM_026002    | Mtdh          | + |
| E-DMM66 | Cdkn2a <sup>+/+</sup> _C57 | SIN.LV.SF | LIVER  | 15 | 43359999 | + | NM_025736    | Ttc35         | + |
| E-DMM66 | Cdkn2a <sup>+/+</sup> _C57 | SIN.LV.SF | LIVER  | 15 | 52767159 | + | NM_010162    | Ext1          | - |
| E-DMM75 | Cdkn2a <sup>+/+</sup> _C57 | SIN.LV.SF | LIVER  | 15 | 52932962 | - | NM_010162    | Ext1          | - |
| E-DMM70 | Cdkn2a <sup>+/+</sup> _C57 | SIN.LV.SF | LIVER  | 15 | 55723681 | + | NM_016667    | Sntb1         | - |
| E-DMM70 | Cdkn2a <sup>+/+</sup> _C57 | SIN.LV.SF | LIVER  | 15 | 66371552 | + | NM_172514    | Tmem71        | - |
| E-DMM70 | Cdkn2a <sup>+/+</sup> _C57 | SIN.LV.SF | LIVER  | 15 | 68158828 | - | NM_001145888 | Zfat          | - |
| E-DMM70 | Cdkn2a <sup>+/+</sup> _C57 | SIN.LV.SF | LIVER  | 15 | 69666307 | + | NM_010158    | Khdrbs3       | + |
| E-DMM69 | Cdkn2a <sup>+/+</sup> _C57 | SIN.LV.SF | LIVER  | 15 | 92109741 | - | NM_001159647 | Cntn1         | + |
| E-DMM70 | Cdkn2a <sup>+/+</sup> _C57 | SIN.LV.SF | LIVER  | 15 | 99833030 | - | NM_001024526 | Larp4         | + |
| E-DMM70 | Cdkn2a <sup>+/+</sup> _C57 | SIN.LV.SF | LIVER  | 16 | 7441024  | + | NM_021477    | A2bp1         | + |
| E-DMM70 | Cdkn2a <sup>+/+</sup> _C57 | SIN.LV.SF | LIVER  | 16 | 14383946 | + | NM_008576    | Abcc1         | + |
| E-DMM76 | Cdkn2a <sup>+/+</sup> _C57 | SIN.LV.SF | SPLEEN | 16 | 18897945 | - | NM_010435    | Hira          | + |
| E-DMM70 | Cdkn2a <sup>+/+</sup> _C57 | SIN.LV.SF | LIVER  | 16 | 20108885 | - | NM_029436    | Klhl24        | + |
| E-DMM70 | Cdkn2a <sup>+/+</sup> _C57 | SIN.LV.SF | LIVER  | 16 | 24912081 | + | NM_001145952 | Lpp           | + |
| E-DMM70 | Cdkn2a <sup>+/+</sup> _C57 | SIN.LV.SF | LIVER  | 16 | 52925947 | + | NM_009655    | Alcam         | - |
| E-DMM70 | Cdkn2a <sup>+/+</sup> _C57 | SIN.LV.SF | LIVER  | 16 | 55817607 | - | NM_001159394 | Nfkbiz        | - |
| E-DMM75 | Cdkn2a <sup>+/+</sup> _C57 | SIN.LV.SF | LIVER  | 16 | 56187283 | + | NM_001003971 | Senp7         | + |
| E-DMM75 | Cdkn2a <sup>+/+</sup> _C57 | SIN.LV.SF | LIVER  | 16 | 56187324 | - | NM_001003971 | Senp7         | + |
| E-DMM74 | Cdkn2a <sup>+/+</sup> _C57 | SIN.LV.SF | LIVER  | 16 | 56189964 | + | NM_001003971 | Senp7         | + |
| E-DMM74 | Cdkn2a <sup>+/+</sup> _C57 | SIN.LV.SF | LIVER  | 16 | 56190217 | - | NM_001003971 | Senp7         | + |
| E-DMM70 | Cdkn2a <sup>+/+</sup> _C57 | SIN.LV.SF | LIVER  | 16 | 65700535 | + | NM_026879    | Chmp2b        | - |
| E-DMM70 | Cdkn2a <sup>+/+</sup> _C57 | SIN.LV.SF | LIVER  | 16 | 77044109 | - | NM_013918    | Usp25         | + |
| E-DMM75 | Cdkn2a <sup>+/+</sup> _C57 | SIN.LV.SF | LIVER  | 16 | 81432094 | + | NM_010954    | Ncam2         | + |
| E-DMM70 | Cdkn2a <sup>+/+</sup> _C57 | SIN.LV.SF | LIVER  | 17 | 10477281 | + | NM_001159516 | Qk            | - |
| E-DMM70 | Cdkn2a <sup>+/+</sup> _C57 | SIN.LV.SF | LIVER  | 17 | 14037595 | + | NM_010806    | Mlt4          | + |
| E-DMM68 | Cdkn2a <sup>+/+</sup> _C57 | SIN.LV.SF | LIVER  | 17 | 22993279 | - | NM_001110254 | A630033E08Rik | - |
| E-DMM68 | Cdkn2a <sup>+/+</sup> _C57 | SIN.LV.SF | LIVER  | 17 | 24259427 | + | NM_001080773 | Pdpc1         | - |

|         |                            |           |        |    |          |   |              |               |   |
|---------|----------------------------|-----------|--------|----|----------|---|--------------|---------------|---|
| E-DMM76 | Cdkn2a <sup>+/+</sup> _C57 | SIN.LV.SF | SPLEEN | 17 | 29611007 | - | NM_008842    | Pim1          | + |
| E-DMM76 | Cdkn2a <sup>+/+</sup> _C57 | SIN.LV.SF | SPLEEN | 17 | 37417846 | - | NM_146515    | Olfr99        | - |
| E-DMM70 | Cdkn2a <sup>+/+</sup> _C57 | SIN.LV.SF | LIVER  | 17 | 37677978 | + | NM_001005485 | Olfr111       | + |
| E-DMM70 | Cdkn2a <sup>+/+</sup> _C57 | SIN.LV.SF | LIVER  | 17 | 45083219 | + | NM_178652    | Supt3h        | + |
| E-DMM70 | Cdkn2a <sup>+/+</sup> _C57 | SIN.LV.SF | LIVER  | 17 | 54148372 | + | NM_018751    | Sult1c1       | - |
| E-DMM70 | Cdkn2a <sup>+/+</sup> _C57 | SIN.LV.SF | LIVER  | 17 | 62676316 | - | NM_010109    | Efna5         | - |
| E-DMM76 | Cdkn2a <sup>+/+</sup> _C57 | SIN.LV.SF | SPLEEN | 17 | 74604053 | - | NM_133771    | Memo1         | - |
| E-DMM68 | Cdkn2a <sup>+/+</sup> _C57 | SIN.LV.SF | LIVER  | 17 | 74988381 | + | NM_007566    | Birc6         | + |
| E-DMM76 | Cdkn2a <sup>+/+</sup> _C57 | SIN.LV.SF | SPLEEN | 17 | 82017941 | + | NM_001112798 | Slc8a1        | - |
| E-DMM76 | Cdkn2a <sup>+/+</sup> _C57 | SIN.LV.SF | SPLEEN | 17 | 83798622 | - | NM_001114361 | Eml4          | + |
| E-DMM70 | Cdkn2a <sup>+/+</sup> _C57 | SIN.LV.SF | LIVER  | 17 | 88923146 | + | NM_028658    | Klraql        | + |
| E-DMM66 | Cdkn2a <sup>+/+</sup> _C57 | SIN.LV.SF | LIVER  | 18 | 4332430  | - | NM_007746    | Map3k8        | - |
| E-DMM76 | Cdkn2a <sup>+/+</sup> _C57 | SIN.LV.SF | SPLEEN | 18 | 6210671  | - | NM_008448    | Kif5b         | - |
| E-DMM70 | Cdkn2a <sup>+/+</sup> _C57 | SIN.LV.SF | LIVER  | 18 | 7364863  | - | NM_001081287 | Mpp7          | - |
| E-DMM76 | Cdkn2a <sup>+/+</sup> _C57 | SIN.LV.SF | SPLEEN | 18 | 9352693  | - | NM_026484    | Ccny          | - |
| E-DMM70 | Cdkn2a <sup>+/+</sup> _C57 | SIN.LV.SF | LIVER  | 18 | 15032158 | + | NM_001100449 | Taf4b         | + |
| E-DMM70 | Cdkn2a <sup>+/+</sup> _C57 | SIN.LV.SF | LIVER  | 18 | 17768798 | - | NM_007664    | Cdh2          | - |
| E-DMM70 | Cdkn2a <sup>+/+</sup> _C57 | SIN.LV.SF | LIVER  | 18 | 27180264 | + | NM_001146292 | Brunol4       | - |
| E-DMM70 | Cdkn2a <sup>+/+</sup> _C57 | SIN.LV.SF | LIVER  | 18 | 35724890 | - | NM_010771    | Matr3         | + |
| E-DMM70 | Cdkn2a <sup>+/+</sup> _C57 | SIN.LV.SF | LIVER  | 18 | 38075597 | - | NM_007858    | Diap1         | - |
| E-DMM76 | Cdkn2a <sup>+/+</sup> _C57 | SIN.LV.SF | SPLEEN | 18 | 39636603 | + | NM_008173    | Nr3c1         | - |
| E-DMM70 | Cdkn2a <sup>+/+</sup> _C57 | SIN.LV.SF | LIVER  | 18 | 45008006 | + | NM_001085373 | Mcc           | - |
| E-DMM70 | Cdkn2a <sup>+/+</sup> _C57 | SIN.LV.SF | LIVER  | 18 | 45039462 | + | NM_001085373 | Mcc           | - |
| E-DMM70 | Cdkn2a <sup>+/+</sup> _C57 | SIN.LV.SF | LIVER  | 18 | 48729916 | - | NM_001025388 | Gm5506        | + |
| E-DMM70 | Cdkn2a <sup>+/+</sup> _C57 | SIN.LV.SF | LIVER  | 18 | 51398603 | + | NM_001081224 | Prr16         | + |
| E-DMM66 | Cdkn2a <sup>+/+</sup> _C57 | SIN.LV.SF | LIVER  | 18 | 53156985 | + | NM_026408    | Sncaip        | + |
| E-DMM70 | Cdkn2a <sup>+/+</sup> _C57 | SIN.LV.SF | LIVER  | 18 | 67873661 | + | NM_001127177 | Ptpn2         | - |
| E-DMM70 | Cdkn2a <sup>+/+</sup> _C57 | SIN.LV.SF | LIVER  | 18 | 68441504 | - | NM_153794    | 4933403F05Rik | - |
| E-DMM70 | Cdkn2a <sup>+/+</sup> _C57 | SIN.LV.SF | LIVER  | 18 | 69457552 | + | NM_013685    | Tcf4          | + |
| E-DMM70 | Cdkn2a <sup>+/+</sup> _C57 | SIN.LV.SF | LIVER  | 18 | 72805441 | + | NM_007831    | Dcc           | - |
| E-DMM70 | Cdkn2a <sup>+/+</sup> _C57 | SIN.LV.SF | LIVER  | 18 | 77372992 | - | NM_008602    | Pias2         | + |

|         |                            |           |        |    |           |   |              |               |   |
|---------|----------------------------|-----------|--------|----|-----------|---|--------------|---------------|---|
| E-DMM70 | Cdkn2a <sup>+/+</sup> _C57 | SIN.LV.SF | LIVER  | 18 | 90687545  | - | NM_198295    | Tmx3          | + |
| E-DMM76 | Cdkn2a <sup>+/+</sup> _C57 | SIN.LV.SF | SPLEEN | 19 | 4069907   | - | NM_144869    | BC021614      | - |
| E-DMM70 | Cdkn2a <sup>+/+</sup> _C57 | SIN.LV.SF | LIVER  | 19 | 4198189   | + | NM_011237    | Rad9          | - |
| E-DMM70 | Cdkn2a <sup>+/+</sup> _C57 | SIN.LV.SF | LIVER  | 19 | 10035872  | + | NM_010239    | Fth1          | + |
| E-DMM70 | Cdkn2a <sup>+/+</sup> _C57 | SIN.LV.SF | LIVER  | 19 | 17230021  | + | NM_001136484 | Gcnt1         | - |
| E-DMM70 | Cdkn2a <sup>+/+</sup> _C57 | SIN.LV.SF | LIVER  | 19 | 28686814  | - | NM_175459    | Glis3         | - |
| E-DMM76 | Cdkn2a <sup>+/+</sup> _C57 | SIN.LV.SF | SPLEEN | 19 | 34469298  | + | NM_007987    | Fas           | + |
| E-DMM70 | Cdkn2a <sup>+/+</sup> _C57 | SIN.LV.SF | LIVER  | 19 | 37756622  | + | NM_175353    | Exoc6         | + |
| E-DMM70 | Cdkn2a <sup>+/+</sup> _C57 | SIN.LV.SF | LIVER  | 19 | 38810296  | + | NM_019588    | Plce1         | + |
| E-DMM70 | Cdkn2a <sup>+/+</sup> _C57 | SIN.LV.SF | LIVER  | 19 | 54039564  | + | NM_019658    | Shoc2         | + |
| E-DMM70 | Cdkn2a <sup>+/+</sup> _C57 | SIN.LV.SF | LIVER  | 19 | 54073476  | - | NM_019658    | Shoc2         | + |
| E-DMM70 | Cdkn2a <sup>+/+</sup> _C57 | SIN.LV.SF | LIVER  | 19 | 54077528  | + | NM_019658    | Shoc2         | + |
| E-DMM70 | Cdkn2a <sup>+/+</sup> _C57 | SIN.LV.SF | LIVER  | X  | 6044331   | + | NM_001040459 | Shroom4       | + |
| E-DMM70 | Cdkn2a <sup>+/+</sup> _C57 | SIN.LV.SF | LIVER  | X  | 17801452  | - | NM_009483    | Kdm6a         | + |
| E-DMM70 | Cdkn2a <sup>+/+</sup> _C57 | SIN.LV.SF | LIVER  | X  | 35814428  | - | NM_001017959 | Lamp2         | - |
| E-DMM70 | Cdkn2a <sup>+/+</sup> _C57 | SIN.LV.SF | LIVER  | X  | 42170338  | + | NM_178739    | Wdr40b        | - |
| E-DMM70 | Cdkn2a <sup>+/+</sup> _C57 | SIN.LV.SF | LIVER  | X  | 50733575  | - | NM_027409    | Mospd1        | - |
| E-DMM70 | Cdkn2a <sup>+/+</sup> _C57 | SIN.LV.SF | LIVER  | X  | 57571363  | - | NM_001001798 | Atp11c        | - |
| E-DMM68 | Cdkn2a <sup>+/+</sup> _C57 | SIN.LV.SF | LIVER  | X  | 72671576  | - | NM_145956    | Brc3          | + |
| E-DMM70 | Cdkn2a <sup>+/+</sup> _C57 | SIN.LV.SF | LIVER  | X  | 92628560  | + | NM_175179    | Fam123b       | - |
| E-DMM68 | Cdkn2a <sup>+/+</sup> _C57 | SIN.LV.SF | LIVER  | X  | 95069529  | - | NM_013476    | Ar            | + |
| E-DMM70 | Cdkn2a <sup>+/+</sup> _C57 | SIN.LV.SF | LIVER  | X  | 103091515 | + | NM_009530    | Atrx          | - |
| E-DMM70 | Cdkn2a <sup>+/+</sup> _C57 | SIN.LV.SF | LIVER  | X  | 103218301 | + | NM_025379    | Cox7b         | + |
| E-DMM70 | Cdkn2a <sup>+/+</sup> _C57 | SIN.LV.SF | LIVER  | X  | 104497348 | - | NM_001033251 | Gpr174        | + |
| E-DMM70 | Cdkn2a <sup>+/+</sup> _C57 | SIN.LV.SF | LIVER  | X  | 124365393 | + | NR_003646    | 4921511C20Rik | + |
| E-DMM70 | Cdkn2a <sup>+/+</sup> _C57 | SIN.LV.SF | LIVER  | X  | 140763035 | + | NM_026247    | Alg13         | + |
| E-DMM70 | Cdkn2a <sup>+/+</sup> _C57 | SIN.LV.SF | LIVER  | X  | 140800174 | - | NM_009428    | Trpc5         | - |
| E-DMM39 | Cdkn2a <sup>+/+</sup> _C57 | LV.SF.LTR | LIVER  | 1  | 10991890  | - | NM_029525    | Prex2         | + |
| E-DMM42 | Cdkn2a <sup>+/+</sup> _C57 | LV.SF.LTR | LIVER  | 1  | 17029331  | - | NM_020604    | Jph1          | - |
| E-DMM45 | Cdkn2a <sup>+/+</sup> _C57 | LV.SF.LTR | LIVER  | 1  | 30923167  | + | NM_001081080 | Phf3          | - |
| E-DMM37 | Cdkn2a <sup>+/+</sup> _C57 | LV.SF.LTR | LIVER  | 1  | 30926087  | + | NM_001081080 | Phf3          | - |

|         |                            |           |       |   |           |   |              |               |   |
|---------|----------------------------|-----------|-------|---|-----------|---|--------------|---------------|---|
| E-DMM38 | Cdkn2a <sup>+/+</sup> _C57 | LV.SF.LTR | LIVER | 1 | 33517798  | + | NM_008922    | Prim2         | - |
| E-DMM37 | Cdkn2a <sup>+/+</sup> _C57 | LV.SF.LTR | LIVER | 1 | 33558897  | - | NM_008922    | Prim2         | - |
| E-DMM37 | Cdkn2a <sup>+/+</sup> _C57 | LV.SF.LTR | LIVER | 1 | 44609194  | + | NM_028450    | Gulp1         | + |
| E-DMM37 | Cdkn2a <sup>+/+</sup> _C57 | LV.SF.LTR | LIVER | 1 | 52209976  | - | NM_009283    | Stat1         | + |
| E-DMM46 | Cdkn2a <sup>+/+</sup> _C57 | LV.SF.LTR | LIVER | 1 | 71615952  | + | NM_026195    | Atic          | + |
| E-DMM43 | Cdkn2a <sup>+/+</sup> _C57 | LV.SF.LTR | LIVER | 1 | 78702406  | - | NM_001033606 | Acsl3         | + |
| E-DMM42 | Cdkn2a <sup>+/+</sup> _C57 | LV.SF.LTR | LIVER | 1 | 97489877  | - | NM_009183    | St8sia4       | - |
| E-DMM38 | Cdkn2a <sup>+/+</sup> _C57 | LV.SF.LTR | LIVER | 1 | 116541116 | - | NM_001077425 | Cntnap5a      | + |
| E-DMM44 | Cdkn2a <sup>+/+</sup> _C57 | LV.SF.LTR | LIVER | 1 | 130065591 | - | NM_181750    | R3hdm1        | + |
| E-DMM43 | Cdkn2a <sup>+/+</sup> _C57 | LV.SF.LTR | LIVER | 1 | 132600178 | + | NM_008825    | Pfkfb2        | - |
| E-DMM39 | Cdkn2a <sup>+/+</sup> _C57 | LV.SF.LTR | LIVER | 1 | 136454146 | - | NM_152895    | Kdm5b         | + |
| E-DMM45 | Cdkn2a <sup>+/+</sup> _C57 | LV.SF.LTR | LIVER | 1 | 140890389 | - | NM_181347    | Dennd1b       | + |
| E-DMM46 | Cdkn2a <sup>+/+</sup> _C57 | LV.SF.LTR | LIVER | 1 | 140994502 | - | NM_181347    | Dennd1b       | + |
| E-DMM37 | Cdkn2a <sup>+/+</sup> _C57 | LV.SF.LTR | LIVER | 1 | 145508179 | + | NM_145991    | Cdc73         | - |
| E-DMM37 | Cdkn2a <sup>+/+</sup> _C57 | LV.SF.LTR | LIVER | 1 | 146074827 | - | NM_015811    | Rgs1          | - |
| E-DMM37 | Cdkn2a <sup>+/+</sup> _C57 | LV.SF.LTR | LIVER | 1 | 151763920 | - | NM_008869    | Pla2g4a       | - |
| E-DMM43 | Cdkn2a <sup>+/+</sup> _C57 | LV.SF.LTR | LIVER | 1 | 151832356 | + | NM_008869    | Pla2g4a       | - |
| E-DMM37 | Cdkn2a <sup>+/+</sup> _C57 | LV.SF.LTR | LIVER | 1 | 166012207 | - | NM_011346    | Sell          | + |
| E-DMM39 | Cdkn2a <sup>+/+</sup> _C57 | LV.SF.LTR | LIVER | 1 | 175553588 | - | NM_175026    | Pyhin1        | + |
| E-DMM45 | Cdkn2a <sup>+/+</sup> _C57 | LV.SF.LTR | LIVER | 1 | 179086155 | - | NM_011785    | Akt3          | - |
| E-DMM39 | Cdkn2a <sup>+/+</sup> _C57 | LV.SF.LTR | LIVER | 1 | 179191708 | - | NM_011785    | Akt3          | - |
| E-DMM43 | Cdkn2a <sup>+/+</sup> _C57 | LV.SF.LTR | LIVER | 1 | 180255599 | - | NM_025511    | 2310005N03Rik | + |
| E-DMM45 | Cdkn2a <sup>+/+</sup> _C57 | LV.SF.LTR | LIVER | 1 | 188564005 | + | NM_026041    | Rrp15         | - |
| E-DMM46 | Cdkn2a <sup>+/+</sup> _C57 | LV.SF.LTR | LIVER | 1 | 193052714 | + | NM_007498    | Atf3          | - |
| E-DMM46 | Cdkn2a <sup>+/+</sup> _C57 | LV.SF.LTR | LIVER | 1 | 193052821 | - | NM_007498    | Atf3          | - |
| E-DMM46 | Cdkn2a <sup>+/+</sup> _C57 | LV.SF.LTR | LIVER | 1 | 193052826 | - | NM_007498    | Atf3          | - |
| E-DMM47 | Cdkn2a <sup>+/+</sup> _C57 | LV.SF.LTR | LIVER | 1 | 193877900 | - | NM_011633    | Traf5         | - |
| E-DMM39 | Cdkn2a <sup>+/+</sup> _C57 | LV.SF.LTR | LIVER | 2 | 17840025  | - | NM_026627    | 1700113O17Rik | - |
| E-DMM45 | Cdkn2a <sup>+/+</sup> _C57 | LV.SF.LTR | LIVER | 2 | 18880945  | + | NM_008845    | Pip4k2a       | - |
| E-DMM39 | Cdkn2a <sup>+/+</sup> _C57 | LV.SF.LTR | LIVER | 2 | 39064513  | - | NM_024209    | Ppp6c         | - |
| E-DMM37 | Cdkn2a <sup>+/+</sup> _C57 | LV.SF.LTR | LIVER | 2 | 45405926  | + | NM_015753    | Zeb2          | - |

|         |                            |           |       |   |           |   |              |          |   |
|---------|----------------------------|-----------|-------|---|-----------|---|--------------|----------|---|
| E-DMM47 | Cdkn2a <sup>+/+</sup> _C57 | LV.SF.LTR | LIVER | 2 | 48810000  | + | NM_029924    | Mbd5     | + |
| E-DMM45 | Cdkn2a <sup>+/+</sup> _C57 | LV.SF.LTR | LIVER | 2 | 51974299  | - | NM_175238    | Rif1     | + |
| E-DMM37 | Cdkn2a <sup>+/+</sup> _C57 | LV.SF.LTR | LIVER | 2 | 79922538  | - | NM_016744    | Pde1a    | - |
| E-DMM37 | Cdkn2a <sup>+/+</sup> _C57 | LV.SF.LTR | LIVER | 2 | 92110086  | - | NM_001109690 | Phf21a   | + |
| E-DMM42 | Cdkn2a <sup>+/+</sup> _C57 | LV.SF.LTR | LIVER | 2 | 98504238  | - | NM_178725    | Lrrc4c   | + |
| E-DMM37 | Cdkn2a <sup>+/+</sup> _C57 | LV.SF.LTR | LIVER | 2 | 117614277 | - | NM_011580    | Thbs1    | + |
| E-DMM43 | Cdkn2a <sup>+/+</sup> _C57 | LV.SF.LTR | LIVER | 2 | 118255020 | - | NM_013719    | Eif2ak4  | + |
| E-DMM38 | Cdkn2a <sup>+/+</sup> _C57 | LV.SF.LTR | LIVER | 2 | 121830203 | + | NM_212450    | Ctdsp12  | + |
| E-DMM44 | Cdkn2a <sup>+/+</sup> _C57 | LV.SF.LTR | LIVER | 2 | 124472242 | - | NM_172537    | Sema6d   | + |
| E-DMM46 | Cdkn2a <sup>+/+</sup> _C57 | LV.SF.LTR | LIVER | 2 | 126242995 | + | NM_001080944 | Atp8b4   | - |
| E-DMM37 | Cdkn2a <sup>+/+</sup> _C57 | LV.SF.LTR | LIVER | 2 | 154165838 | + | NM_025876    | Cdk5rap1 | - |
| E-DMM38 | Cdkn2a <sup>+/+</sup> _C57 | LV.SF.LTR | LIVER | 3 | 16113541  | - | NM_001145919 | Ythdf3   | + |
| E-DMM37 | Cdkn2a <sup>+/+</sup> _C57 | LV.SF.LTR | LIVER | 3 | 22084551  | + | NM_030732    | Tbl1xr1  | + |
| E-DMM38 | Cdkn2a <sup>+/+</sup> _C57 | LV.SF.LTR | LIVER | 3 | 29137522  | - | NM_001033479 | Gm1527   | + |
| E-DMM38 | Cdkn2a <sup>+/+</sup> _C57 | LV.SF.LTR | LIVER | 3 | 39152805  | + | NM_183221    | Fat4     | + |
| E-DMM44 | Cdkn2a <sup>+/+</sup> _C57 | LV.SF.LTR | LIVER | 3 | 41505497  | + | NM_001081411 | Sclt1    | - |
| E-DMM44 | Cdkn2a <sup>+/+</sup> _C57 | LV.SF.LTR | LIVER | 3 | 45047624  | - | NM_001098170 | Pcdh10   | + |
| E-DMM44 | Cdkn2a <sup>+/+</sup> _C57 | LV.SF.LTR | LIVER | 3 | 45089150  | - | NM_001098170 | Pcdh10   | + |
| E-DMM46 | Cdkn2a <sup>+/+</sup> _C57 | LV.SF.LTR | LIVER | 3 | 54165568  | + | NM_015784    | Postn    | + |
| E-DMM42 | Cdkn2a <sup>+/+</sup> _C57 | LV.SF.LTR | LIVER | 3 | 60533587  | + | NM_020007    | Mbnl1    | + |
| E-DMM45 | Cdkn2a <sup>+/+</sup> _C57 | LV.SF.LTR | LIVER | 3 | 75045333  | + | NM_026460    | Serpini2 | - |
| E-DMM37 | Cdkn2a <sup>+/+</sup> _C57 | LV.SF.LTR | LIVER | 3 | 94664111  | + | NM_172683    | Pogz     | + |
| E-DMM43 | Cdkn2a <sup>+/+</sup> _C57 | LV.SF.LTR | LIVER | 3 | 109347323 | - | NM_020505    | Vav3     | + |
| E-DMM39 | Cdkn2a <sup>+/+</sup> _C57 | LV.SF.LTR | LIVER | 3 | 126860348 | - | NM_178655    | Ank2     | - |
| E-DMM45 | Cdkn2a <sup>+/+</sup> _C57 | LV.SF.LTR | LIVER | 3 | 135126820 | - | NM_025356    | Ube2d3   | + |
| E-DMM43 | Cdkn2a <sup>+/+</sup> _C57 | LV.SF.LTR | LIVER | 3 | 142019884 | + | NM_022554    | Pdlim5   | - |
| E-DMM39 | Cdkn2a <sup>+/+</sup> _C57 | LV.SF.LTR | LIVER | 3 | 144816591 | + | NM_025714    | Odf2l    | + |
| E-DMM39 | Cdkn2a <sup>+/+</sup> _C57 | LV.SF.LTR | LIVER | 3 | 146407783 | + | NM_011100    | Prkacb   | - |
| E-DMM47 | Cdkn2a <sup>+/+</sup> _C57 | LV.SF.LTR | LIVER | 3 | 157138692 | + | NM_017381    | Zranb2   | + |
| E-DMM43 | Cdkn2a <sup>+/+</sup> _C57 | LV.SF.LTR | LIVER | 3 | 159183356 | - | NM_029523    | Depdc1a  | + |
| E-DMM37 | Cdkn2a <sup>+/+</sup> _C57 | LV.SF.LTR | LIVER | 3 | 159184157 | - | NM_029523    | Depdc1a  | + |



|         |                            |           |       |   |           |   |              |               |   |
|---------|----------------------------|-----------|-------|---|-----------|---|--------------|---------------|---|
| E-DMM46 | Cdkn2a <sup>+/+</sup> _C57 | LV.SF.LTR | LIVER | 4 | 3486023   | + | NM_028097    | Tmem68        | - |
| E-DMM37 | Cdkn2a <sup>+/+</sup> _C57 | LV.SF.LTR | LIVER | 4 | 9560272   | - | NM_133723    | Asph          | - |
| E-DMM39 | Cdkn2a <sup>+/+</sup> _C57 | LV.SF.LTR | LIVER | 4 | 16125239  | - | NM_138952    | Ripk2         | - |
| E-DMM46 | Cdkn2a <sup>+/+</sup> _C57 | LV.SF.LTR | LIVER | 4 | 19545546  | - | NM_177327    | Wwp1          | - |
| E-DMM38 | Cdkn2a <sup>+/+</sup> _C57 | LV.SF.LTR | LIVER | 4 | 24456538  | - | NM_199467    | F730047E07Rik | + |
| E-DMM39 | Cdkn2a <sup>+/+</sup> _C57 | LV.SF.LTR | LIVER | 4 | 34947794  | - | NM_178061    | Mobk12b       | - |
| E-DMM46 | Cdkn2a <sup>+/+</sup> _C57 | LV.SF.LTR | LIVER | 4 | 56790701  | - | NM_026079    | Ikbkap        | - |
| E-DMM45 | Cdkn2a <sup>+/+</sup> _C57 | LV.SF.LTR | LIVER | 4 | 70939779  | + | NM_172694    | Megf9         | - |
| E-DMM45 | Cdkn2a <sup>+/+</sup> _C57 | LV.SF.LTR | LIVER | 4 | 71830927  | - | NM_011599    | Tle1          | - |
| E-DMM45 | Cdkn2a <sup>+/+</sup> _C57 | LV.SF.LTR | LIVER | 4 | 88109459  | + | NM_025760    | Ptplad2       | - |
| E-DMM37 | Cdkn2a <sup>+/+</sup> _C57 | LV.SF.LTR | LIVER | 4 | 108858389 | + | NM_133885    | Osbp19        | - |
| E-DMM45 | Cdkn2a <sup>+/+</sup> _C57 | LV.SF.LTR | LIVER | 4 | 148641972 | - | NM_008441    | Kif1b         | - |
| E-DMM43 | Cdkn2a <sup>+/+</sup> _C57 | LV.SF.LTR | LIVER | 5 | 3560082   | + | NM_001042501 | 5830415L20Rik | + |
| E-DMM43 | Cdkn2a <sup>+/+</sup> _C57 | LV.SF.LTR | LIVER | 5 | 5314606   | - | NM_011074    | Pftk1         | - |
| E-DMM43 | Cdkn2a <sup>+/+</sup> _C57 | LV.SF.LTR | LIVER | 5 | 23527082  | - | NM_053090    | Fam126a       | - |
| E-DMM43 | Cdkn2a <sup>+/+</sup> _C57 | LV.SF.LTR | LIVER | 5 | 39332168  | - | NM_013748    | Clnk          | - |
| E-DMM45 | Cdkn2a <sup>+/+</sup> _C57 | LV.SF.LTR | LIVER | 5 | 47810747  | - | NM_178804    | Slit2         | + |
| E-DMM46 | Cdkn2a <sup>+/+</sup> _C57 | LV.SF.LTR | LIVER | 5 | 88998609  | + | NM_023054    | Utp3          | + |
| E-DMM37 | Cdkn2a <sup>+/+</sup> _C57 | LV.SF.LTR | LIVER | 5 | 97224157  | - | NM_013470    | Anxa3         | + |
| E-DMM39 | Cdkn2a <sup>+/+</sup> _C57 | LV.SF.LTR | LIVER | 5 | 104442185 | - | NM_053262    | Hsd17b11      | - |
| E-DMM39 | Cdkn2a <sup>+/+</sup> _C57 | LV.SF.LTR | LIVER | 5 | 106322063 | + | NM_018759    | Zfp326        | + |
| E-DMM46 | Cdkn2a <sup>+/+</sup> _C57 | LV.SF.LTR | LIVER | 6 | 15348354  | + | NM_053242    | Foxp2         | + |
| E-DMM43 | Cdkn2a <sup>+/+</sup> _C57 | LV.SF.LTR | LIVER | 6 | 15414284  | + | NM_053242    | Foxp2         | + |
| E-DMM46 | Cdkn2a <sup>+/+</sup> _C57 | LV.SF.LTR | LIVER | 6 | 24599547  | + | NM_028459    | Wasl          | - |
| E-DMM39 | Cdkn2a <sup>+/+</sup> _C57 | LV.SF.LTR | LIVER | 6 | 27497120  | - | NM_008174    | Grm8          | - |
| E-DMM43 | Cdkn2a <sup>+/+</sup> _C57 | LV.SF.LTR | LIVER | 6 | 28721183  | + | NM_019776    | Snd1          | + |
| E-DMM39 | Cdkn2a <sup>+/+</sup> _C57 | LV.SF.LTR | LIVER | 6 | 35471309  | - | NM_008098    | Mtpn          | - |
| E-DMM37 | Cdkn2a <sup>+/+</sup> _C57 | LV.SF.LTR | LIVER | 6 | 36857901  | + | NM_001081206 | Dgki          | - |
| E-DMM45 | Cdkn2a <sup>+/+</sup> _C57 | LV.SF.LTR | LIVER | 6 | 39310908  | + | NM_028123    | Slc37a3       | - |
| E-DMM46 | Cdkn2a <sup>+/+</sup> _C57 | LV.SF.LTR | LIVER | 6 | 39594787  | + | NM_139294    | Braf          | - |
| E-DMM46 | Cdkn2a <sup>+/+</sup> _C57 | LV.SF.LTR | LIVER | 6 | 39594879  | - | NM_139294    | Braf          | - |

|         |                            |           |       |   |           |   |              |               |   |
|---------|----------------------------|-----------|-------|---|-----------|---|--------------|---------------|---|
| E-DMM42 | Cdkn2a <sup>+/+</sup> _C57 | LV.SF.LTR | LIVER | 6 | 39595116  | - | NM_139294    | Braf          | - |
| E-DMM37 | Cdkn2a <sup>+/+</sup> _C57 | LV.SF.LTR | LIVER | 6 | 39595250  | - | NM_139294    | Braf          | - |
| E-DMM45 | Cdkn2a <sup>+/+</sup> _C57 | LV.SF.LTR | LIVER | 6 | 39595423  | - | NM_139294    | Braf          | - |
| E-DMM42 | Cdkn2a <sup>+/+</sup> _C57 | LV.SF.LTR | LIVER | 6 | 39595545  | + | NM_139294    | Braf          | - |
| E-DMM38 | Cdkn2a <sup>+/+</sup> _C57 | LV.SF.LTR | LIVER | 6 | 39595576  | + | NM_139294    | Braf          | - |
| E-DMM42 | Cdkn2a <sup>+/+</sup> _C57 | LV.SF.LTR | LIVER | 6 | 39595603  | - | NM_139294    | Braf          | - |
| E-DMM38 | Cdkn2a <sup>+/+</sup> _C57 | LV.SF.LTR | LIVER | 6 | 39595730  | - | NM_139294    | Braf          | - |
| E-DMM39 | Cdkn2a <sup>+/+</sup> _C57 | LV.SF.LTR | LIVER | 6 | 39595953  | - | NM_139294    | Braf          | - |
| E-DMM42 | Cdkn2a <sup>+/+</sup> _C57 | LV.SF.LTR | LIVER | 6 | 39596155  | - | NM_139294    | Braf          | - |
| E-DMM43 | Cdkn2a <sup>+/+</sup> _C57 | LV.SF.LTR | LIVER | 6 | 39596395  | - | NM_139294    | Braf          | - |
| E-DMM44 | Cdkn2a <sup>+/+</sup> _C57 | LV.SF.LTR | LIVER | 6 | 39596638  | - | NM_139294    | Braf          | - |
| E-DMM38 | Cdkn2a <sup>+/+</sup> _C57 | LV.SF.LTR | LIVER | 6 | 39597061  | - | NM_139294    | Braf          | - |
| E-DMM46 | Cdkn2a <sup>+/+</sup> _C57 | LV.SF.LTR | LIVER | 6 | 39597790  | - | NM_139294    | Braf          | - |
| E-DMM42 | Cdkn2a <sup>+/+</sup> _C57 | LV.SF.LTR | LIVER | 6 | 39598132  | - | NM_139294    | Braf          | - |
| E-DMM38 | Cdkn2a <sup>+/+</sup> _C57 | LV.SF.LTR | LIVER | 6 | 40309371  | + | NM_023538    | Agk           | + |
| E-DMM37 | Cdkn2a <sup>+/+</sup> _C57 | LV.SF.LTR | LIVER | 6 | 41002580  | + | NM_023333    | 2210010C04Rik | - |
| E-DMM39 | Cdkn2a <sup>+/+</sup> _C57 | LV.SF.LTR | LIVER | 6 | 48963240  | + | NM_172888    | Svs1          | + |
| E-DMM37 | Cdkn2a <sup>+/+</sup> _C57 | LV.SF.LTR | LIVER | 6 | 57536950  | - | NM_175523    | Ppm1k         | - |
| E-DMM46 | Cdkn2a <sup>+/+</sup> _C57 | LV.SF.LTR | LIVER | 6 | 64374801  | - | NM_008167    | Grid2         | + |
| E-DMM43 | Cdkn2a <sup>+/+</sup> _C57 | LV.SF.LTR | LIVER | 6 | 109988487 | - | NM_177328    | Grm7          | + |
| E-DMM38 | Cdkn2a <sup>+/+</sup> _C57 | LV.SF.LTR | LIVER | 6 | 134481806 | - | NM_008514    | Lrp6          | - |
| E-DMM45 | Cdkn2a <sup>+/+</sup> _C57 | LV.SF.LTR | LIVER | 7 | 66543467  | + | NM_173010    | Ube3a         | + |
| E-DMM43 | Cdkn2a <sup>+/+</sup> _C57 | LV.SF.LTR | LIVER | 7 | 90989725  | + | NM_030705    | Mesdc1        | - |
| E-DMM37 | Cdkn2a <sup>+/+</sup> _C57 | LV.SF.LTR | LIVER | 7 | 104964924 | + | NM_011035    | Pak1          | + |
| E-DMM45 | Cdkn2a <sup>+/+</sup> _C57 | LV.SF.LTR | LIVER | 8 | 34853495  | + | NM_026584    | Gtf2e2        | + |
| E-DMM43 | Cdkn2a <sup>+/+</sup> _C57 | LV.SF.LTR | LIVER | 8 | 40735409  | - | NM_001113326 | Msr1          | - |
| E-DMM37 | Cdkn2a <sup>+/+</sup> _C57 | LV.SF.LTR | LIVER | 8 | 59069100  | + | NM_015791    | Fbxo8         | + |
| E-DMM44 | Cdkn2a <sup>+/+</sup> _C57 | LV.SF.LTR | LIVER | 8 | 65099465  | + | NM_023689    | Spock3        | + |
| E-DMM38 | Cdkn2a <sup>+/+</sup> _C57 | LV.SF.LTR | LIVER | 8 | 93404328  | + | NM_177224    | Chd9          | + |
| E-DMM38 | Cdkn2a <sup>+/+</sup> _C57 | LV.SF.LTR | LIVER | 8 | 93404435  | - | NM_177224    | Chd9          | + |
| E-DMM43 | Cdkn2a <sup>+/+</sup> _C57 | LV.SF.LTR | LIVER | 8 | 111485105 | - | NM_007496    | Zfx3          | + |

|         |                            |           |       |    |           |   |              |               |   |
|---------|----------------------------|-----------|-------|----|-----------|---|--------------|---------------|---|
| E-DMM44 | Cdkn2a <sup>+/+</sup> _C57 | LV.SF.LTR | LIVER | 8  | 113858832 | - | NM_029005    | Mkl1          | - |
| E-DMM42 | Cdkn2a <sup>+/+</sup> _C57 | LV.SF.LTR | LIVER | 9  | 7126417   | + | NM_029851    | Dync2h1       | - |
| E-DMM42 | Cdkn2a <sup>+/+</sup> _C57 | LV.SF.LTR | LIVER | 9  | 7127287   | + | NM_029851    | Dync2h1       | - |
| E-DMM42 | Cdkn2a <sup>+/+</sup> _C57 | LV.SF.LTR | LIVER | 9  | 7127314   | - | NM_029851    | Dync2h1       | - |
| E-DMM45 | Cdkn2a <sup>+/+</sup> _C57 | LV.SF.LTR | LIVER | 9  | 15523832  | + | NM_172289    | Slc36a4       | + |
| E-DMM38 | Cdkn2a <sup>+/+</sup> _C57 | LV.SF.LTR | LIVER | 9  | 19959873  | - | NM_146904    | Olftr870      | - |
| E-DMM46 | Cdkn2a <sup>+/+</sup> _C57 | LV.SF.LTR | LIVER | 9  | 35112927  | - | NM_028040    | Rpusd4        | + |
| E-DMM46 | Cdkn2a <sup>+/+</sup> _C57 | LV.SF.LTR | LIVER | 9  | 71710497  | + | NM_011544    | Tcf12         | - |
| E-DMM46 | Cdkn2a <sup>+/+</sup> _C57 | LV.SF.LTR | LIVER | 9  | 71939915  | - | NM_011544    | Tcf12         | - |
| E-DMM43 | Cdkn2a <sup>+/+</sup> _C57 | LV.SF.LTR | LIVER | 9  | 75023802  | - | NM_010864    | Myo5a         | + |
| E-DMM45 | Cdkn2a <sup>+/+</sup> _C57 | LV.SF.LTR | LIVER | 9  | 79942395  | - | NM_146003    | Senp6         | + |
| E-DMM46 | Cdkn2a <sup>+/+</sup> _C57 | LV.SF.LTR | LIVER | 9  | 79985339  | - | NM_146003    | Senp6         | + |
| E-DMM43 | Cdkn2a <sup>+/+</sup> _C57 | LV.SF.LTR | LIVER | 9  | 82828042  | + | NM_001081216 | Phip          | - |
| E-DMM45 | Cdkn2a <sup>+/+</sup> _C57 | LV.SF.LTR | LIVER | 9  | 85232236  | + | NM_001160379 | Fam46a        | - |
| E-DMM45 | Cdkn2a <sup>+/+</sup> _C57 | LV.SF.LTR | LIVER | 9  | 85284822  | - | NM_001160379 | Fam46a        | - |
| E-DMM45 | Cdkn2a <sup>+/+</sup> _C57 | LV.SF.LTR | LIVER | 9  | 87121712  | - | NM_199316    | 4922501C03Rik | - |
| E-DMM43 | Cdkn2a <sup>+/+</sup> _C57 | LV.SF.LTR | LIVER | 9  | 100581045 | + | NM_009282    | Stag1         | + |
| E-DMM43 | Cdkn2a <sup>+/+</sup> _C57 | LV.SF.LTR | LIVER | 9  | 103211390 | + | NM_176979    | Topbp1        | + |
| E-DMM37 | Cdkn2a <sup>+/+</sup> _C57 | LV.SF.LTR | LIVER | 9  | 123932826 | + | NM_009914    | Ccr3          | + |
| E-DMM43 | Cdkn2a <sup>+/+</sup> _C57 | LV.SF.LTR | LIVER | 10 | 4531152   | + | NM_175374    | Mtrf11        | + |
| E-DMM38 | Cdkn2a <sup>+/+</sup> _C57 | LV.SF.LTR | LIVER | 10 | 6278616   | + | NM_172308    | Mthfd11       | - |
| E-DMM46 | Cdkn2a <sup>+/+</sup> _C57 | LV.SF.LTR | LIVER | 10 | 16461039  | - | NM_010828    | Cited2        | + |
| E-DMM42 | Cdkn2a <sup>+/+</sup> _C57 | LV.SF.LTR | LIVER | 10 | 66629028  | - | NM_207221    | Jmjd1c        | + |
| E-DMM44 | Cdkn2a <sup>+/+</sup> _C57 | LV.SF.LTR | LIVER | 10 | 66662725  | + | NM_207221    | Jmjd1c        | + |
| E-DMM43 | Cdkn2a <sup>+/+</sup> _C57 | LV.SF.LTR | LIVER | 10 | 67445054  | + | NM_001081346 | Rtkn2         | + |
| E-DMM37 | Cdkn2a <sup>+/+</sup> _C57 | LV.SF.LTR | LIVER | 10 | 90539869  | - | NM_001042558 | Apaf1         | - |
| E-DMM42 | Cdkn2a <sup>+/+</sup> _C57 | LV.SF.LTR | LIVER | 10 | 92169515  | - | NM_008682    | Nedd1         | - |
| E-DMM38 | Cdkn2a <sup>+/+</sup> _C57 | LV.SF.LTR | LIVER | 10 | 94293778  | + | NM_018797    | Plxnc1        | - |
| E-DMM42 | Cdkn2a <sup>+/+</sup> _C57 | LV.SF.LTR | LIVER | 10 | 99922786  | - | NM_001033332 | Tmtc3         | - |
| E-DMM38 | Cdkn2a <sup>+/+</sup> _C57 | LV.SF.LTR | LIVER | 10 | 100341179 | + | NM_001081246 | 1700017N19Rik | + |
| E-DMM45 | Cdkn2a <sup>+/+</sup> _C57 | LV.SF.LTR | LIVER | 10 | 126900779 | + | NM_027900    | R3hdm2        | + |

|         |                            |           |       |    |           |   |              |               |   |
|---------|----------------------------|-----------|-------|----|-----------|---|--------------|---------------|---|
| E-DMM45 | Cdkn2a <sup>+/+</sup> _C57 | LV.SF.LTR | LIVER | 10 | 126901028 | - | NM_027900    | R3hdm2        | + |
| E-DMM37 | Cdkn2a <sup>+/+</sup> _C57 | LV.SF.LTR | LIVER | 11 | 3066412   | - | NM_030207    | Sfi1          | - |
| E-DMM44 | Cdkn2a <sup>+/+</sup> _C57 | LV.SF.LTR | LIVER | 11 | 16895723  | + | NM_019549    | Plek          | - |
| E-DMM44 | Cdkn2a <sup>+/+</sup> _C57 | LV.SF.LTR | LIVER | 11 | 16895917  | - | NM_019549    | Plek          | - |
| E-DMM44 | Cdkn2a <sup>+/+</sup> _C57 | LV.SF.LTR | LIVER | 11 | 16895932  | - | NM_019549    | Plek          | - |
| E-DMM37 | Cdkn2a <sup>+/+</sup> _C57 | LV.SF.LTR | LIVER | 11 | 22615311  | + | NM_016888    | B3gnt2        | - |
| E-DMM42 | Cdkn2a <sup>+/+</sup> _C57 | LV.SF.LTR | LIVER | 11 | 35592735  | + | NM_145962    | Pank3         | + |
| E-DMM37 | Cdkn2a <sup>+/+</sup> _C57 | LV.SF.LTR | LIVER | 11 | 40666342  | + | NM_009831    | Ceng1         | - |
| E-DMM46 | Cdkn2a <sup>+/+</sup> _C57 | LV.SF.LTR | LIVER | 11 | 40667301  | - | NM_009831    | Ceng1         | - |
| E-DMM43 | Cdkn2a <sup>+/+</sup> _C57 | LV.SF.LTR | LIVER | 11 | 46688233  | + | NM_178759    | Timd4         | + |
| E-DMM44 | Cdkn2a <sup>+/+</sup> _C57 | LV.SF.LTR | LIVER | 11 | 65873764  | - | NM_001099633 | Dnahc9        | - |
| E-DMM46 | Cdkn2a <sup>+/+</sup> _C57 | LV.SF.LTR | LIVER | 11 | 91479445  | + | NM_028547    | Kif2b         | - |
| E-DMM46 | Cdkn2a <sup>+/+</sup> _C57 | LV.SF.LTR | LIVER | 11 | 100883012 | - | NM_016920    | Atp6v0a1      | + |
| E-DMM42 | Cdkn2a <sup>+/+</sup> _C57 | LV.SF.LTR | LIVER | 12 | 41495313  | + | NM_172803    | Dock4         | + |
| E-DMM42 | Cdkn2a <sup>+/+</sup> _C57 | LV.SF.LTR | LIVER | 12 | 41495494  | - | NM_172803    | Dock4         | + |
| E-DMM37 | Cdkn2a <sup>+/+</sup> _C57 | LV.SF.LTR | LIVER | 12 | 61032264  | - | NM_001033156 | Fbxo33        | - |
| E-DMM46 | Cdkn2a <sup>+/+</sup> _C57 | LV.SF.LTR | LIVER | 12 | 82995327  | - | NM_018814    | Pcnx          | + |
| E-DMM38 | Cdkn2a <sup>+/+</sup> _C57 | LV.SF.LTR | LIVER | 12 | 96970542  | + | NM_201518    | Flrt2         | + |
| E-DMM43 | Cdkn2a <sup>+/+</sup> _C57 | LV.SF.LTR | LIVER | 12 | 107271178 | + | NM_001029843 | Vrk1          | + |
| E-DMM38 | Cdkn2a <sup>+/+</sup> _C57 | LV.SF.LTR | LIVER | 12 | 120620174 | + | NM_177290    | Itgb8         | - |
| E-DMM38 | Cdkn2a <sup>+/+</sup> _C57 | LV.SF.LTR | LIVER | 12 | 120620358 | - | NM_177290    | Itgb8         | - |
| E-DMM37 | Cdkn2a <sup>+/+</sup> _C57 | LV.SF.LTR | LIVER | 13 | 83731429  | - | NM_025282    | Mef2c         | + |
| E-DMM39 | Cdkn2a <sup>+/+</sup> _C57 | LV.SF.LTR | LIVER | 13 | 83759577  | - | NM_025282    | Mef2c         | + |
| E-DMM43 | Cdkn2a <sup>+/+</sup> _C57 | LV.SF.LTR | LIVER | 13 | 120137786 | + | NR_003544    | Nnt           | - |
| E-DMM43 | Cdkn2a <sup>+/+</sup> _C57 | LV.SF.LTR | LIVER | 13 | 120257568 | + | NM_001113550 | 4833420G17Rik | + |
| E-DMM38 | Cdkn2a <sup>+/+</sup> _C57 | LV.SF.LTR | LIVER | 14 | 14924346  | + | NM_139227    | Atxn7         | + |
| E-DMM38 | Cdkn2a <sup>+/+</sup> _C57 | LV.SF.LTR | LIVER | 14 | 16569073  | + | NM_146052    | Lrrc3b        | - |
| E-DMM45 | Cdkn2a <sup>+/+</sup> _C57 | LV.SF.LTR | LIVER | 14 | 31224148  | - | NM_028981    | Cacna1d       | - |
| E-DMM43 | Cdkn2a <sup>+/+</sup> _C57 | LV.SF.LTR | LIVER | 14 | 49644648  | - | NM_207214    | Exoc5         | - |
| E-DMM39 | Cdkn2a <sup>+/+</sup> _C57 | LV.SF.LTR | LIVER | 14 | 87819205  | - | NM_172605    | Tdrd3         | + |
| E-DMM38 | Cdkn2a <sup>+/+</sup> _C57 | LV.SF.LTR | LIVER | 14 | 106555523 | - | NM_198601    | Trim52        | + |

|         |                            |           |       |    |           |   |              |         |   |
|---------|----------------------------|-----------|-------|----|-----------|---|--------------|---------|---|
| E-DMM39 | Cdkn2a <sup>+/+</sup> _C57 | LV.SF.LTR | LIVER | 14 | 123113094 | - | NM_144844    | Pcca    | + |
| E-DMM39 | Cdkn2a <sup>+/+</sup> _C57 | LV.SF.LTR | LIVER | 15 | 7769762   | + | NM_010275    | Gdnf    | + |
| E-DMM39 | Cdkn2a <sup>+/+</sup> _C57 | LV.SF.LTR | LIVER | 15 | 19707675  | + | NM_009865    | Cdh10   | + |
| E-DMM38 | Cdkn2a <sup>+/+</sup> _C57 | LV.SF.LTR | LIVER | 15 | 33293248  | + | NM_018755    | Pgcp    | + |
| E-DMM45 | Cdkn2a <sup>+/+</sup> _C57 | LV.SF.LTR | LIVER | 15 | 35343867  | + | NM_177151    | Vps13b  | + |
| E-DMM45 | Cdkn2a <sup>+/+</sup> _C57 | LV.SF.LTR | LIVER | 15 | 44458969  | + | NM_019480    | Ebag9   | + |
| E-DMM44 | Cdkn2a <sup>+/+</sup> _C57 | LV.SF.LTR | LIVER | 15 | 50155229  | + | NM_032000    | Trps1   | - |
| E-DMM38 | Cdkn2a <sup>+/+</sup> _C57 | LV.SF.LTR | LIVER | 15 | 51824775  | + | NM_009009    | Rad21   | - |
| E-DMM38 | Cdkn2a <sup>+/+</sup> _C57 | LV.SF.LTR | LIVER | 15 | 67348626  | + | NM_009177    | St3gal1 | - |
| E-DMM37 | Cdkn2a <sup>+/+</sup> _C57 | LV.SF.LTR | LIVER | 15 | 103059805 | + | NM_001076789 | Cbx5    | - |
| E-DMM42 | Cdkn2a <sup>+/+</sup> _C57 | LV.SF.LTR | LIVER | 16 | 15739657  | - | NM_011159    | Prkdc   | + |
| E-DMM39 | Cdkn2a <sup>+/+</sup> _C57 | LV.SF.LTR | LIVER | 16 | 18122170  | + | NM_022982    | Rtn4r   | + |
| E-DMM45 | Cdkn2a <sup>+/+</sup> _C57 | LV.SF.LTR | LIVER | 16 | 31486591  | - | NM_001122683 | Bdh1    | + |
| E-DMM46 | Cdkn2a <sup>+/+</sup> _C57 | LV.SF.LTR | LIVER | 16 | 38206158  | + | NM_019827    | Gsk3b   | + |
| E-DMM43 | Cdkn2a <sup>+/+</sup> _C57 | LV.SF.LTR | LIVER | 16 | 56130918  | - | NM_001003971 | Senp7   | + |
| E-DMM38 | Cdkn2a <sup>+/+</sup> _C57 | LV.SF.LTR | LIVER | 16 | 56698656  | - | NM_019678    | Tfg     | - |
| E-DMM37 | Cdkn2a <sup>+/+</sup> _C57 | LV.SF.LTR | LIVER | 16 | 70319677  | + | NM_028803    | Gbe1    | + |
| E-DMM43 | Cdkn2a <sup>+/+</sup> _C57 | LV.SF.LTR | LIVER | 16 | 70420030  | + | NM_028803    | Gbe1    | + |
| E-DMM46 | Cdkn2a <sup>+/+</sup> _C57 | LV.SF.LTR | LIVER | 16 | 85163692  | - | NM_007471    | App     | - |
| E-DMM37 | Cdkn2a <sup>+/+</sup> _C57 | LV.SF.LTR | LIVER | 17 | 28875733  | + | NM_011951    | Mapk14  | + |
| E-DMM37 | Cdkn2a <sup>+/+</sup> _C57 | LV.SF.LTR | LIVER | 17 | 28875847  | - | NM_011951    | Mapk14  | + |
| E-DMM47 | Cdkn2a <sup>+/+</sup> _C57 | LV.SF.LTR | LIVER | 17 | 35274930  | - | NM_057171    | Bat3    | + |
| E-DMM38 | Cdkn2a <sup>+/+</sup> _C57 | LV.SF.LTR | LIVER | 17 | 37421643  | - | NM_146515    | Olfir99 | - |
| E-DMM45 | Cdkn2a <sup>+/+</sup> _C57 | LV.SF.LTR | LIVER | 17 | 51941878  | + | NM_009122    | Satb1   | - |
| E-DMM39 | Cdkn2a <sup>+/+</sup> _C57 | LV.SF.LTR | LIVER | 17 | 62800953  | + | NM_010109    | Efna5   | - |
| E-DMM45 | Cdkn2a <sup>+/+</sup> _C57 | LV.SF.LTR | LIVER | 17 | 63680767  | + | NM_010109    | Efna5   | - |
| E-DMM38 | Cdkn2a <sup>+/+</sup> _C57 | LV.SF.LTR | LIVER | 18 | 4491530   | + | NM_026157    | Mtpap   | + |
| E-DMM43 | Cdkn2a <sup>+/+</sup> _C57 | LV.SF.LTR | LIVER | 18 | 18499219  | + | NM_007664    | Cdh2    | - |
| E-DMM39 | Cdkn2a <sup>+/+</sup> _C57 | LV.SF.LTR | LIVER | 18 | 24383776  | + | NM_001160404 | Galnt1  | + |
| E-DMM44 | Cdkn2a <sup>+/+</sup> _C57 | LV.SF.LTR | LIVER | 18 | 52327521  | - | NM_026286    | Ftmt    | + |
| E-DMM38 | Cdkn2a <sup>+/+</sup> _C57 | LV.SF.LTR | LIVER | 18 | 53352554  | + | NM_026386    | Snx2    | + |

|         |                            |               |       |    |           |   |              |               |   |
|---------|----------------------------|---------------|-------|----|-----------|---|--------------|---------------|---|
| E-DMM44 | Cdkn2a <sup>+/+</sup> _C57 | LV.SF.LTR     | LIVER | 18 | 68843872  | + | NM_008560    | Mc2r          | - |
| E-DMM43 | Cdkn2a <sup>+/+</sup> _C57 | LV.SF.LTR     | LIVER | 18 | 70641870  | + | NM_029019    | Stard6        | + |
| E-DMM38 | Cdkn2a <sup>+/+</sup> _C57 | LV.SF.LTR     | LIVER | 19 | 21681509  | + | NM_025423    | 1110059E24Rik | - |
| E-DMM37 | Cdkn2a <sup>+/+</sup> _C57 | LV.SF.LTR     | LIVER | 19 | 28996039  | - | NM_198651    | 4430402I18Rik | - |
| E-DMM39 | Cdkn2a <sup>+/+</sup> _C57 | LV.SF.LTR     | LIVER | 19 | 31058830  | + | NM_011160    | Prkg1         | - |
| E-DMM38 | Cdkn2a <sup>+/+</sup> _C57 | LV.SF.LTR     | LIVER | 19 | 55149532  | - | NM_008149    | Gpam          | - |
| E-DMM43 | Cdkn2a <sup>+/+</sup> _C57 | LV.SF.LTR     | LIVER | 19 | 57720575  | + | NM_181415    | Atrnl1        | + |
| E-DMM43 | Cdkn2a <sup>+/+</sup> _C57 | LV.SF.LTR     | LIVER | 19 | 60634207  | + | NM_030197    | 2700078E11Rik | - |
| E-DMM39 | Cdkn2a <sup>+/+</sup> _C57 | LV.SF.LTR     | LIVER | X  | 6020564   | + | NM_001040459 | Shroom4       | + |
| E-DMM45 | Cdkn2a <sup>+/+</sup> _C57 | LV.SF.LTR     | LIVER | X  | 12865169  | - | NM_010028    | Ddx3x         | + |
| E-DMM44 | Cdkn2a <sup>+/+</sup> _C57 | LV.SF.LTR     | LIVER | X  | 23382515  | - | NM_175180    | Wdr44         | + |
| E-DMM43 | Cdkn2a <sup>+/+</sup> _C57 | LV.SF.LTR     | LIVER | X  | 57589530  | + | NM_001001798 | Atp11c        | - |
| E-DMM44 | Cdkn2a <sup>+/+</sup> _C57 | LV.SF.LTR     | LIVER | X  | 76692218  | + | NM_001099307 | Gm7173        | - |
| E-DMM37 | Cdkn2a <sup>+/+</sup> _C57 | LV.SF.LTR     | LIVER | X  | 83499281  | - | NM_001033492 | CN716893      | - |
| E-DMM42 | Cdkn2a <sup>+/+</sup> _C57 | LV.SF.LTR     | LIVER | X  | 101557387 | - | NM_009592    | Abcb7         | - |
| E-DMM44 | Cdkn2a <sup>+/+</sup> _C57 | LV.SF.LTR     | LIVER | X  | 101599251 | - | NM_009592    | Abcb7         | - |
| E-DMM44 | Cdkn2a <sup>+/+</sup> _C57 | LV.SF.LTR     | LIVER | X  | 134718382 | - | NM_030688    | Il1rapl2      | + |
| E-DMM42 | Cdkn2a <sup>+/+</sup> _C57 | LV.SF.LTR     | LIVER | X  | 163254973 | + | NM_019397    | Egfl6         | - |
| E-DMM63 | Cdkn2a <sup>+/+</sup> _C57 | SIN.LV.SF.GFP | LIVER | 1  | 4589709   | + | NM_011441    | Sox17         | - |
| E-DMM58 | Cdkn2a <sup>+/+</sup> _C57 | SIN.LV.SF.GFP | LIVER | 1  | 5112568   | + | NM_133826    | Atp6v1h       | + |
| E-DMM50 | Cdkn2a <sup>+/+</sup> _C57 | SIN.LV.SF.GFP | LIVER | 1  | 6222610   | - | NM_009826    | Rb1cc1        | + |
| E-DMM65 | Cdkn2a <sup>+/+</sup> _C57 | SIN.LV.SF.GFP | LIVER | 1  | 6226980   | + | NM_009826    | Rb1cc1        | + |
| E-DMM57 | Cdkn2a <sup>+/+</sup> _C57 | SIN.LV.SF.GFP | LIVER | 1  | 6454337   | + | NM_009826    | Rb1cc1        | + |
| E-DMM55 | Cdkn2a <sup>+/+</sup> _C57 | SIN.LV.SF.GFP | LIVER | 1  | 7017760   | + | NM_183028    | Pcmd1         | + |
| E-DMM58 | Cdkn2a <sup>+/+</sup> _C57 | SIN.LV.SF.GFP | LIVER | 1  | 7134964   | + | NM_183028    | Pcmd1         | + |
| E-DMM63 | Cdkn2a <sup>+/+</sup> _C57 | SIN.LV.SF.GFP | LIVER | 1  | 7158325   | - | NM_183028    | Pcmd1         | + |
| E-DMM57 | Cdkn2a <sup>+/+</sup> _C57 | SIN.LV.SF.GFP | LIVER | 1  | 9816807   | + | NM_133220    | Sgk3          | + |
| E-DMM58 | Cdkn2a <sup>+/+</sup> _C57 | SIN.LV.SF.GFP | LIVER | 1  | 10068877  | + | NM_026493    | Cspp1         | + |
| E-DMM58 | Cdkn2a <sup>+/+</sup> _C57 | SIN.LV.SF.GFP | LIVER | 1  | 10451108  | + | NM_177834    | Cpa6          | - |
| E-DMM48 | Cdkn2a <sup>+/+</sup> _C57 | SIN.LV.SF.GFP | LIVER | 1  | 11112886  | - | NM_029525    | Prex2         | + |
| E-DMM50 | Cdkn2a <sup>+/+</sup> _C57 | SIN.LV.SF.GFP | LIVER | 1  | 12273008  | - | NM_001160369 | A830018L16Rik | + |

|         |                            |               |       |   |          |   |              |               |   |
|---------|----------------------------|---------------|-------|---|----------|---|--------------|---------------|---|
| E-DMM59 | Cdkn2a <sup>+/+</sup> _C57 | SIN.LV.SF.GFP | LIVER | 1 | 15799217 | + | NM_009352    | Terf1         | + |
| E-DMM52 | Cdkn2a <sup>+/+</sup> _C57 | SIN.LV.SF.GFP | LIVER | 1 | 16035600 | - | NM_011291    | Rpl7          | - |
| E-DMM57 | Cdkn2a <sup>+/+</sup> _C57 | SIN.LV.SF.GFP | LIVER | 1 | 16189556 | + | NM_001111272 | Stau2         | - |
| E-DMM52 | Cdkn2a <sup>+/+</sup> _C57 | SIN.LV.SF.GFP | LIVER | 1 | 16314807 | - | NM_001111272 | Stau2         | - |
| E-DMM63 | Cdkn2a <sup>+/+</sup> _C57 | SIN.LV.SF.GFP | LIVER | 1 | 20238299 | + | NM_153179    | Pkhd1         | - |
| E-DMM59 | Cdkn2a <sup>+/+</sup> _C57 | SIN.LV.SF.GFP | LIVER | 1 | 23178602 | - | NM_025746    | 4933415F23Rik | - |
| E-DMM59 | Cdkn2a <sup>+/+</sup> _C57 | SIN.LV.SF.GFP | LIVER | 1 | 23292950 | + | NM_001081079 | Ogfr1         | - |
| E-DMM63 | Cdkn2a <sup>+/+</sup> _C57 | SIN.LV.SF.GFP | LIVER | 1 | 23868037 | + | NM_028534    | Smap1         | - |
| E-DMM49 | Cdkn2a <sup>+/+</sup> _C57 | SIN.LV.SF.GFP | LIVER | 1 | 23873205 | - | NM_028534    | Smap1         | - |
| E-DMM58 | Cdkn2a <sup>+/+</sup> _C57 | SIN.LV.SF.GFP | LIVER | 1 | 24057774 | + | NM_026604    | Fam135a       | - |
| E-DMM58 | Cdkn2a <sup>+/+</sup> _C57 | SIN.LV.SF.GFP | LIVER | 1 | 24814742 | + | NM_026719    | Lmbrd1        | + |
| E-DMM65 | Cdkn2a <sup>+/+</sup> _C57 | SIN.LV.SF.GFP | LIVER | 1 | 32305806 | + | NM_133235    | Khdrbs2       | + |
| E-DMM50 | Cdkn2a <sup>+/+</sup> _C57 | SIN.LV.SF.GFP | LIVER | 1 | 33843596 | - | NM_133817    | Zfp451        | - |
| E-DMM58 | Cdkn2a <sup>+/+</sup> _C57 | SIN.LV.SF.GFP | LIVER | 1 | 34250126 | + | NM_133833    | Dst           | + |
| E-DMM52 | Cdkn2a <sup>+/+</sup> _C57 | SIN.LV.SF.GFP | LIVER | 1 | 38135927 | + | NM_019570    | Rev1          | - |
| E-DMM52 | Cdkn2a <sup>+/+</sup> _C57 | SIN.LV.SF.GFP | LIVER | 1 | 39492144 | + | NM_018775    | Tbc1d8        | - |
| E-DMM57 | Cdkn2a <sup>+/+</sup> _C57 | SIN.LV.SF.GFP | LIVER | 1 | 40345995 | - | NM_001123382 | Il1r1         | + |
| E-DMM65 | Cdkn2a <sup>+/+</sup> _C57 | SIN.LV.SF.GFP | LIVER | 1 | 42556976 | - | NM_008900    | Pou3f3        | + |
| E-DMM63 | Cdkn2a <sup>+/+</sup> _C57 | SIN.LV.SF.GFP | LIVER | 1 | 44611137 | - | NM_028450    | Gulp1         | + |
| E-DMM50 | Cdkn2a <sup>+/+</sup> _C57 | SIN.LV.SF.GFP | LIVER | 1 | 46882002 | - | NM_172653    | Slc39a10      | - |
| E-DMM65 | Cdkn2a <sup>+/+</sup> _C57 | SIN.LV.SF.GFP | LIVER | 1 | 46912187 | + | NM_172653    | Slc39a10      | - |
| E-DMM49 | Cdkn2a <sup>+/+</sup> _C57 | SIN.LV.SF.GFP | LIVER | 1 | 46912485 | + | NM_172653    | Slc39a10      | - |
| E-DMM63 | Cdkn2a <sup>+/+</sup> _C57 | SIN.LV.SF.GFP | LIVER | 1 | 47389274 | + | NM_172653    | Slc39a10      | - |
| E-DMM50 | Cdkn2a <sup>+/+</sup> _C57 | SIN.LV.SF.GFP | LIVER | 1 | 48070653 | + | NM_172653    | Slc39a10      | - |
| E-DMM49 | Cdkn2a <sup>+/+</sup> _C57 | SIN.LV.SF.GFP | LIVER | 1 | 48071155 | - | NM_172653    | Slc39a10      | - |
| E-DMM63 | Cdkn2a <sup>+/+</sup> _C57 | SIN.LV.SF.GFP | LIVER | 1 | 50679337 | + | NM_019790    | Tmeff2        | + |
| E-DMM59 | Cdkn2a <sup>+/+</sup> _C57 | SIN.LV.SF.GFP | LIVER | 1 | 50679435 | - | NM_019790    | Tmeff2        | + |
| E-DMM49 | Cdkn2a <sup>+/+</sup> _C57 | SIN.LV.SF.GFP | LIVER | 1 | 50689148 | - | NM_019790    | Tmeff2        | + |
| E-DMM47 | Cdkn2a <sup>+/+</sup> _C57 | SIN.LV.SF.GFP | LIVER | 1 | 51129325 | + | NM_019790    | Tmeff2        | + |
| E-DMM55 | Cdkn2a <sup>+/+</sup> _C57 | SIN.LV.SF.GFP | LIVER | 1 | 51960495 | + | NM_010863    | Myo1b         | - |
| E-DMM63 | Cdkn2a <sup>+/+</sup> _C57 | SIN.LV.SF.GFP | LIVER | 1 | 52492949 | - | NM_008667    | Nab1          | - |

|         |                            |               |       |   |          |   |              |               |   |
|---------|----------------------------|---------------|-------|---|----------|---|--------------|---------------|---|
| E-DMM57 | Cdkn2a <sup>+/+</sup> _C57 | SIN.LV.SF.GFP | LIVER | 1 | 52855784 | - | NM_008384    | Inpp1         | - |
| E-DMM52 | Cdkn2a <sup>+/+</sup> _C57 | SIN.LV.SF.GFP | LIVER | 1 | 53120496 | + | NM_010834    | Mstn          | + |
| E-DMM50 | Cdkn2a <sup>+/+</sup> _C57 | SIN.LV.SF.GFP | LIVER | 1 | 53122168 | + | NM_010834    | Mstn          | + |
| E-DMM65 | Cdkn2a <sup>+/+</sup> _C57 | SIN.LV.SF.GFP | LIVER | 1 | 53258876 | - | NM_153556    | Pms1          | - |
| E-DMM52 | Cdkn2a <sup>+/+</sup> _C57 | SIN.LV.SF.GFP | LIVER | 1 | 53828733 | - | NM_133810    | Stk17b        | - |
| E-DMM63 | Cdkn2a <sup>+/+</sup> _C57 | SIN.LV.SF.GFP | LIVER | 1 | 53829496 | - | NM_133810    | Stk17b        | - |
| E-DMM52 | Cdkn2a <sup>+/+</sup> _C57 | SIN.LV.SF.GFP | LIVER | 1 | 53882451 | + | NM_001001883 | Hecw2         | - |
| E-DMM59 | Cdkn2a <sup>+/+</sup> _C57 | SIN.LV.SF.GFP | LIVER | 1 | 53980838 | - | NM_001001883 | Hecw2         | - |
| E-DMM57 | Cdkn2a <sup>+/+</sup> _C57 | SIN.LV.SF.GFP | LIVER | 1 | 54414690 | - | NM_030025    | Ccdc150       | + |
| E-DMM63 | Cdkn2a <sup>+/+</sup> _C57 | SIN.LV.SF.GFP | LIVER | 1 | 54473274 | + | NM_001033194 | Gtf3c3        | - |
| E-DMM52 | Cdkn2a <sup>+/+</sup> _C57 | SIN.LV.SF.GFP | LIVER | 1 | 54584419 | + | NM_001033194 | Gtf3c3        | - |
| E-DMM55 | Cdkn2a <sup>+/+</sup> _C57 | SIN.LV.SF.GFP | LIVER | 1 | 56359622 | - | NM_027661    | Hsfy2         | - |
| E-DMM63 | Cdkn2a <sup>+/+</sup> _C57 | SIN.LV.SF.GFP | LIVER | 1 | 58603488 | + | NM_172513    | Fam126b       | - |
| E-DMM49 | Cdkn2a <sup>+/+</sup> _C57 | SIN.LV.SF.GFP | LIVER | 1 | 59922474 | + | NM_007561    | Bmpr2         | + |
| E-DMM57 | Cdkn2a <sup>+/+</sup> _C57 | SIN.LV.SF.GFP | LIVER | 1 | 60052269 | + | NM_027407    | Ical1         | - |
| E-DMM63 | Cdkn2a <sup>+/+</sup> _C57 | SIN.LV.SF.GFP | LIVER | 1 | 61566077 | - | NM_001081050 | Pard3b        | + |
| E-DMM57 | Cdkn2a <sup>+/+</sup> _C57 | SIN.LV.SF.GFP | LIVER | 1 | 62536193 | + | NM_001081050 | Pard3b        | + |
| E-DMM52 | Cdkn2a <sup>+/+</sup> _C57 | SIN.LV.SF.GFP | LIVER | 1 | 62623069 | + | NM_001081050 | Pard3b        | + |
| E-DMM65 | Cdkn2a <sup>+/+</sup> _C57 | SIN.LV.SF.GFP | LIVER | 1 | 63109349 | - | NM_001081436 | Ino80d        | - |
| E-DMM48 | Cdkn2a <sup>+/+</sup> _C57 | SIN.LV.SF.GFP | LIVER | 1 | 64161255 | + | NM_033563    | Klf7          | - |
| E-DMM59 | Cdkn2a <sup>+/+</sup> _C57 | SIN.LV.SF.GFP | LIVER | 1 | 66211967 | + | NM_001039934 | Mtap2         | + |
| E-DMM57 | Cdkn2a <sup>+/+</sup> _C57 | SIN.LV.SF.GFP | LIVER | 1 | 66772800 | - | NM_001122738 | 1110028C15Rik | - |
| E-DMM63 | Cdkn2a <sup>+/+</sup> _C57 | SIN.LV.SF.GFP | LIVER | 1 | 69590070 | + | NM_011770    | Ikzf2         | - |
| E-DMM52 | Cdkn2a <sup>+/+</sup> _C57 | SIN.LV.SF.GFP | LIVER | 1 | 70230400 | + | NM_025728    | Spag16        | + |
| E-DMM59 | Cdkn2a <sup>+/+</sup> _C57 | SIN.LV.SF.GFP | LIVER | 1 | 71817428 | - | NR_027658    | Gm8883        | + |
| E-DMM65 | Cdkn2a <sup>+/+</sup> _C57 | SIN.LV.SF.GFP | LIVER | 1 | 73196604 | + | NM_009407    | Tnp1          | - |
| E-DMM50 | Cdkn2a <sup>+/+</sup> _C57 | SIN.LV.SF.GFP | LIVER | 1 | 76399898 | + | NM_009208    | Slc4a3        | + |
| E-DMM57 | Cdkn2a <sup>+/+</sup> _C57 | SIN.LV.SF.GFP | LIVER | 1 | 79699317 | + | NM_001111279 | Wdfy1         | - |
| E-DMM58 | Cdkn2a <sup>+/+</sup> _C57 | SIN.LV.SF.GFP | LIVER | 1 | 80287030 | + | NM_016716    | Cul3          | - |
| E-DMM58 | Cdkn2a <sup>+/+</sup> _C57 | SIN.LV.SF.GFP | LIVER | 1 | 80568850 | - | NM_175291    | Dock10        | - |
| E-DMM57 | Cdkn2a <sup>+/+</sup> _C57 | SIN.LV.SF.GFP | LIVER | 1 | 80612501 | - | NM_175291    | Dock10        | - |



|         |                            |               |       |   |           |   |              |               |   |
|---------|----------------------------|---------------|-------|---|-----------|---|--------------|---------------|---|
| E-DMM57 | Cdkn2a <sup>+/+</sup> _C57 | SIN.LV.SF.GFP | LIVER | 1 | 81264206  | - | NM_172849    | 9430031J16Rik | + |
| E-DMM48 | Cdkn2a <sup>+/+</sup> _C57 | SIN.LV.SF.GFP | LIVER | 1 | 83742965  | + | NM_001003948 | 5033414K04Rik | - |
| E-DMM50 | Cdkn2a <sup>+/+</sup> _C57 | SIN.LV.SF.GFP | LIVER | 1 | 84778285  | - | NM_133975    | Trip12        | - |
| E-DMM59 | Cdkn2a <sup>+/+</sup> _C57 | SIN.LV.SF.GFP | LIVER | 1 | 84797674  | - | NM_133975    | Trip12        | - |
| E-DMM58 | Cdkn2a <sup>+/+</sup> _C57 | SIN.LV.SF.GFP | LIVER | 1 | 84864386  | - | NM_025386    | Fbxo36        | + |
| E-DMM63 | Cdkn2a <sup>+/+</sup> _C57 | SIN.LV.SF.GFP | LIVER | 1 | 88472573  | + | NM_008801    | Pde6d         | - |
| E-DMM48 | Cdkn2a <sup>+/+</sup> _C57 | SIN.LV.SF.GFP | LIVER | 1 | 89722304  | + | NM_009118    | Sag           | + |
| E-DMM52 | Cdkn2a <sup>+/+</sup> _C57 | SIN.LV.SF.GFP | LIVER | 1 | 89893864  | + | NM_001033291 | Usp40         | - |
| E-DMM57 | Cdkn2a <sup>+/+</sup> _C57 | SIN.LV.SF.GFP | LIVER | 1 | 91007891  | - | NM_133816    | Sh3bp4        | + |
| E-DMM58 | Cdkn2a <sup>+/+</sup> _C57 | SIN.LV.SF.GFP | LIVER | 1 | 93202117  | + | NM_016717    | Scly          | + |
| E-DMM57 | Cdkn2a <sup>+/+</sup> _C57 | SIN.LV.SF.GFP | LIVER | 1 | 95368015  | + | NM_133808    | Hdlbp         | - |
| E-DMM48 | Cdkn2a <sup>+/+</sup> _C57 | SIN.LV.SF.GFP | LIVER | 1 | 97551650  | + | NM_001159745 | St8sia4       | - |
| E-DMM52 | Cdkn2a <sup>+/+</sup> _C57 | SIN.LV.SF.GFP | LIVER | 1 | 97903574  | + | NM_001159745 | St8sia4       | - |
| E-DMM57 | Cdkn2a <sup>+/+</sup> _C57 | SIN.LV.SF.GFP | LIVER | 1 | 100455366 | - | NM_013626    | Pam           | - |
| E-DMM52 | Cdkn2a <sup>+/+</sup> _C57 | SIN.LV.SF.GFP | LIVER | 1 | 107591555 | - | NM_029349    | 2310035C23Rik | + |
| E-DMM49 | Cdkn2a <sup>+/+</sup> _C57 | SIN.LV.SF.GFP | LIVER | 1 | 108102431 | + | NM_001122675 | Zcchc2        | + |
| E-DMM55 | Cdkn2a <sup>+/+</sup> _C57 | SIN.LV.SF.GFP | LIVER | 1 | 108687836 | - | NM_009190    | Vps4b         | - |
| E-DMM52 | Cdkn2a <sup>+/+</sup> _C57 | SIN.LV.SF.GFP | LIVER | 1 | 110157141 | + | NM_011459    | Serpnb8       | + |
| E-DMM63 | Cdkn2a <sup>+/+</sup> _C57 | SIN.LV.SF.GFP | LIVER | 1 | 113391421 | + | NM_001081316 | Dsel          | - |
| E-DMM52 | Cdkn2a <sup>+/+</sup> _C57 | SIN.LV.SF.GFP | LIVER | 1 | 121560591 | + | NM_019933    | Ptpn4         | - |
| E-DMM63 | Cdkn2a <sup>+/+</sup> _C57 | SIN.LV.SF.GFP | LIVER | 1 | 121617751 | - | NM_019933    | Ptpn4         | - |
| E-DMM52 | Cdkn2a <sup>+/+</sup> _C57 | SIN.LV.SF.GFP | LIVER | 1 | 124494476 | + | NM_199021    | Dpp10         | - |
| E-DMM63 | Cdkn2a <sup>+/+</sup> _C57 | SIN.LV.SF.GFP | LIVER | 1 | 125392745 | + | NM_199021    | Dpp10         | - |
| E-DMM48 | Cdkn2a <sup>+/+</sup> _C57 | SIN.LV.SF.GFP | LIVER | 1 | 126317556 | + | NM_199021    | Dpp10         | - |
| E-DMM58 | Cdkn2a <sup>+/+</sup> _C57 | SIN.LV.SF.GFP | LIVER | 1 | 127462506 | + | NM_028787    | Slc35f5       | + |
| E-DMM55 | Cdkn2a <sup>+/+</sup> _C57 | SIN.LV.SF.GFP | LIVER | 1 | 127855803 | + | NM_001081756 | E030049G20Rik | - |
| E-DMM58 | Cdkn2a <sup>+/+</sup> _C57 | SIN.LV.SF.GFP | LIVER | 1 | 130305688 | + | NM_177445    | Dars          | - |
| E-DMM59 | Cdkn2a <sup>+/+</sup> _C57 | SIN.LV.SF.GFP | LIVER | 1 | 132600583 | - | NM_008825    | Prkfb2        | - |
| E-DMM48 | Cdkn2a <sup>+/+</sup> _C57 | SIN.LV.SF.GFP | LIVER | 1 | 138912964 | + | NM_030676    | Nr5a2         | - |
| E-DMM58 | Cdkn2a <sup>+/+</sup> _C57 | SIN.LV.SF.GFP | LIVER | 1 | 140066244 | + | NM_001111316 | Ptprc         | - |
| E-DMM52 | Cdkn2a <sup>+/+</sup> _C57 | SIN.LV.SF.GFP | LIVER | 1 | 140928027 | + | NM_181347    | Dennd1b       | + |

|         |                            |               |       |   |           |   |              |          |   |
|---------|----------------------------|---------------|-------|---|-----------|---|--------------|----------|---|
| E-DMM48 | Cdkn2a <sup>+/+</sup> _C57 | SIN.LV.SF.GFP | LIVER | 1 | 144807235 | + | NM_145991    | Cdc73    | - |
| E-DMM59 | Cdkn2a <sup>+/+</sup> _C57 | SIN.LV.SF.GFP | LIVER | 1 | 145483659 | - | NM_145991    | Cdc73    | - |
| E-DMM48 | Cdkn2a <sup>+/+</sup> _C57 | SIN.LV.SF.GFP | LIVER | 1 | 145535009 | - | NM_145991    | Cdc73    | - |
| E-DMM63 | Cdkn2a <sup>+/+</sup> _C57 | SIN.LV.SF.GFP | LIVER | 1 | 145536368 | + | NM_145991    | Cdc73    | - |
| E-DMM52 | Cdkn2a <sup>+/+</sup> _C57 | SIN.LV.SF.GFP | LIVER | 1 | 145841204 | + | NM_009061    | Rgs2     | - |
| E-DMM57 | Cdkn2a <sup>+/+</sup> _C57 | SIN.LV.SF.GFP | LIVER | 1 | 148752791 | + | NM_001145807 | Fam5c    | + |
| E-DMM59 | Cdkn2a <sup>+/+</sup> _C57 | SIN.LV.SF.GFP | LIVER | 1 | 150755050 | + | NM_008869    | Pla2g4a  | - |
| E-DMM50 | Cdkn2a <sup>+/+</sup> _C57 | SIN.LV.SF.GFP | LIVER | 1 | 152249189 | - | NM_133780    | Tpr      | + |
| E-DMM58 | Cdkn2a <sup>+/+</sup> _C57 | SIN.LV.SF.GFP | LIVER | 1 | 153023878 | + | NM_001039511 | Ivns1abp | + |
| E-DMM58 | Cdkn2a <sup>+/+</sup> _C57 | SIN.LV.SF.GFP | LIVER | 1 | 158838236 | - | NM_001159966 | Ralgs2   | - |
| E-DMM48 | Cdkn2a <sup>+/+</sup> _C57 | SIN.LV.SF.GFP | LIVER | 1 | 160506332 | + | NM_007495    | Astn1    | + |
| E-DMM50 | Cdkn2a <sup>+/+</sup> _C57 | SIN.LV.SF.GFP | LIVER | 1 | 161129167 | + | NM_011931    | Rfwd2    | + |
| E-DMM59 | Cdkn2a <sup>+/+</sup> _C57 | SIN.LV.SF.GFP | LIVER | 1 | 162234989 | - | NM_001038621 | Rabgap11 | - |
| E-DMM65 | Cdkn2a <sup>+/+</sup> _C57 | SIN.LV.SF.GFP | LIVER | 1 | 163442485 | - | NM_183391    | Tnfsf18  | + |
| E-DMM65 | Cdkn2a <sup>+/+</sup> _C57 | SIN.LV.SF.GFP | LIVER | 1 | 165912350 | - | NM_201364    | BC055324 | - |
| E-DMM52 | Cdkn2a <sup>+/+</sup> _C57 | SIN.LV.SF.GFP | LIVER | 1 | 166367299 | + | NM_138314    | Nme7     | + |
| E-DMM58 | Cdkn2a <sup>+/+</sup> _C57 | SIN.LV.SF.GFP | LIVER | 1 | 167269470 | + | NM_001081126 | Gpr161   | + |
| E-DMM63 | Cdkn2a <sup>+/+</sup> _C57 | SIN.LV.SF.GFP | LIVER | 1 | 169179162 | - | NM_030724    | Uck2     | - |
| E-DMM63 | Cdkn2a <sup>+/+</sup> _C57 | SIN.LV.SF.GFP | LIVER | 1 | 170185894 | + | NM_183355    | Pbx1     | - |
| E-DMM47 | Cdkn2a <sup>+/+</sup> _C57 | SIN.LV.SF.GFP | LIVER | 1 | 170393397 | + | NM_008783    | Pbx1     | - |
| E-DMM65 | Cdkn2a <sup>+/+</sup> _C57 | SIN.LV.SF.GFP | LIVER | 1 | 171892566 | - | NM_010476    | Hsd17b7  | - |
| E-DMM52 | Cdkn2a <sup>+/+</sup> _C57 | SIN.LV.SF.GFP | LIVER | 1 | 173625855 | + | NM_007649    | Cd48     | + |
| E-DMM50 | Cdkn2a <sup>+/+</sup> _C57 | SIN.LV.SF.GFP | LIVER | 1 | 178672179 | + | NM_001099637 | Cep170   | - |
| E-DMM64 | Cdkn2a <sup>+/+</sup> _C57 | SIN.LV.SF.GFP | LIVER | 1 | 178693492 | - | NM_001099637 | Cep170   | - |
| E-DMM52 | Cdkn2a <sup>+/+</sup> _C57 | SIN.LV.SF.GFP | LIVER | 1 | 179084109 | - | NM_011785    | Akt3     | - |
| E-DMM50 | Cdkn2a <sup>+/+</sup> _C57 | SIN.LV.SF.GFP | LIVER | 1 | 181995176 | + | NM_023341    | Cabc1    | - |
| E-DMM52 | Cdkn2a <sup>+/+</sup> _C57 | SIN.LV.SF.GFP | LIVER | 1 | 183148739 | + | NM_145514    | Wdr26    | - |
| E-DMM57 | Cdkn2a <sup>+/+</sup> _C57 | SIN.LV.SF.GFP | LIVER | 1 | 185799021 | - | NM_022019    | Dusp10   | + |
| E-DMM50 | Cdkn2a <sup>+/+</sup> _C57 | SIN.LV.SF.GFP | LIVER | 1 | 189058619 | - | NM_026367    | Gpatch2  | + |
| E-DMM52 | Cdkn2a <sup>+/+</sup> _C57 | SIN.LV.SF.GFP | LIVER | 1 | 189085651 | - | NM_026367    | Gpatch2  | + |
| E-DMM58 | Cdkn2a <sup>+/+</sup> _C57 | SIN.LV.SF.GFP | LIVER | 1 | 189135863 | - | NM_026367    | Gpatch2  | + |

|         |                            |               |       |   |           |   |              |               |   |
|---------|----------------------------|---------------|-------|---|-----------|---|--------------|---------------|---|
| E-DMM52 | Cdkn2a <sup>+/+</sup> _C57 | SIN.LV.SF.GFP | LIVER | 1 | 189376933 | - | NM_026367    | Gpatch2       | + |
| E-DMM50 | Cdkn2a <sup>+/+</sup> _C57 | SIN.LV.SF.GFP | LIVER | 1 | 190572474 | + | NM_021408    | Ush2a         | + |
| E-DMM57 | Cdkn2a <sup>+/+</sup> _C57 | SIN.LV.SF.GFP | LIVER | 1 | 191926485 | - | NM_008937    | Prox1         | - |
| E-DMM48 | Cdkn2a <sup>+/+</sup> _C57 | SIN.LV.SF.GFP | LIVER | 1 | 192210909 | + | NM_008937    | Prox1         | - |
| E-DMM57 | Cdkn2a <sup>+/+</sup> _C57 | SIN.LV.SF.GFP | LIVER | 1 | 193373604 | + | NM_029766    | Dtl           | - |
| E-DMM50 | Cdkn2a <sup>+/+</sup> _C57 | SIN.LV.SF.GFP | LIVER | 1 | 193506127 | - | NM_172266    | Lpgat1        | + |
| E-DMM55 | Cdkn2a <sup>+/+</sup> _C57 | SIN.LV.SF.GFP | LIVER | 1 | 195143049 | - | NM_008484    | Lamb3         | + |
| E-DMM57 | Cdkn2a <sup>+/+</sup> _C57 | SIN.LV.SF.GFP | LIVER | 1 | 195669293 | - | NM_144817    | Camk1g        | - |
| E-DMM52 | Cdkn2a <sup>+/+</sup> _C57 | SIN.LV.SF.GFP | LIVER | 1 | 196520938 | - | NM_008882    | Plxna2        | + |
| E-DMM52 | Cdkn2a <sup>+/+</sup> _C57 | SIN.LV.SF.GFP | LIVER | 2 | 3220714   | - | NM_008708    | Nmt2          | + |
| E-DMM48 | Cdkn2a <sup>+/+</sup> _C57 | SIN.LV.SF.GFP | LIVER | 2 | 3377687   | + | NM_001110214 | Dclre1c       | + |
| E-DMM55 | Cdkn2a <sup>+/+</sup> _C57 | SIN.LV.SF.GFP | LIVER | 2 | 4691462   | - | NM_178663    | Bend7         | + |
| E-DMM58 | Cdkn2a <sup>+/+</sup> _C57 | SIN.LV.SF.GFP | LIVER | 2 | 4911837   | - | NM_027290    | Mcm10         | - |
| E-DMM48 | Cdkn2a <sup>+/+</sup> _C57 | SIN.LV.SF.GFP | LIVER | 2 | 5425197   | + | NM_177343    | Camk1d        | - |
| E-DMM55 | Cdkn2a <sup>+/+</sup> _C57 | SIN.LV.SF.GFP | LIVER | 2 | 6225200   | + | NM_001080548 | Usp6nl        | + |
| E-DMM65 | Cdkn2a <sup>+/+</sup> _C57 | SIN.LV.SF.GFP | LIVER | 2 | 10280614  | + | NM_177386    | Sfmbt2        | + |
| E-DMM48 | Cdkn2a <sup>+/+</sup> _C57 | SIN.LV.SF.GFP | LIVER | 2 | 11625562  | - | NM_133836    | I15ra         | + |
| E-DMM58 | Cdkn2a <sup>+/+</sup> _C57 | SIN.LV.SF.GFP | LIVER | 2 | 11696933  | + | NM_015792    | Fbxo18        | - |
| E-DMM58 | Cdkn2a <sup>+/+</sup> _C57 | SIN.LV.SF.GFP | LIVER | 2 | 11697113  | - | NM_015792    | Fbxo18        | - |
| E-DMM48 | Cdkn2a <sup>+/+</sup> _C57 | SIN.LV.SF.GFP | LIVER | 2 | 12316640  | - | NM_024185    | 2310047O13Rik | - |
| E-DMM52 | Cdkn2a <sup>+/+</sup> _C57 | SIN.LV.SF.GFP | LIVER | 2 | 13155958  | - | NM_009105    | Rsu1          | - |
| E-DMM65 | Cdkn2a <sup>+/+</sup> _C57 | SIN.LV.SF.GFP | LIVER | 2 | 14988460  | - | NM_029466    | Arl5b         | + |
| E-DMM65 | Cdkn2a <sup>+/+</sup> _C57 | SIN.LV.SF.GFP | LIVER | 2 | 14996980  | + | NM_029466    | Arl5b         | + |
| E-DMM58 | Cdkn2a <sup>+/+</sup> _C57 | SIN.LV.SF.GFP | LIVER | 2 | 20517922  | - | NM_001081006 | Etl4          | + |
| E-DMM59 | Cdkn2a <sup>+/+</sup> _C57 | SIN.LV.SF.GFP | LIVER | 2 | 25956937  | - | NM_026495    | Nacc2         | - |
| E-DMM57 | Cdkn2a <sup>+/+</sup> _C57 | SIN.LV.SF.GFP | LIVER | 2 | 27601994  | - | NM_011305    | Rxra          | + |
| E-DMM57 | Cdkn2a <sup>+/+</sup> _C57 | SIN.LV.SF.GFP | LIVER | 2 | 34986556  | + | NM_012018    | Cep110        | + |
| E-DMM50 | Cdkn2a <sup>+/+</sup> _C57 | SIN.LV.SF.GFP | LIVER | 2 | 35050520  | - | NM_026697    | Rab14         | - |
| E-DMM55 | Cdkn2a <sup>+/+</sup> _C57 | SIN.LV.SF.GFP | LIVER | 2 | 41307058  | - | NM_053011    | Lrp1b         | - |
| E-DMM58 | Cdkn2a <sup>+/+</sup> _C57 | SIN.LV.SF.GFP | LIVER | 2 | 43810581  | + | NM_153820    | Arhgap15      | + |
| E-DMM63 | Cdkn2a <sup>+/+</sup> _C57 | SIN.LV.SF.GFP | LIVER | 2 | 44425703  | + | NM_172662    | Gtde1         | - |

|         |                            |               |       |   |          |   |              |               |   |
|---------|----------------------------|---------------|-------|---|----------|---|--------------|---------------|---|
| E-DMM50 | Cdkn2a <sup>+/+</sup> _C57 | SIN.LV.SF.GFP | LIVER | 2 | 44602092 | - | NM_172662    | Gtde1         | - |
| E-DMM65 | Cdkn2a <sup>+/+</sup> _C57 | SIN.LV.SF.GFP | LIVER | 2 | 44692018 | + | NM_172662    | Gtde1         | - |
| E-DMM50 | Cdkn2a <sup>+/+</sup> _C57 | SIN.LV.SF.GFP | LIVER | 2 | 46044192 | - | NM_015753    | Zeb2          | - |
| E-DMM59 | Cdkn2a <sup>+/+</sup> _C57 | SIN.LV.SF.GFP | LIVER | 2 | 46426450 | - | NM_015753    | Zeb2          | - |
| E-DMM59 | Cdkn2a <sup>+/+</sup> _C57 | SIN.LV.SF.GFP | LIVER | 2 | 48493522 | - | NM_007396    | Acvr2a        | + |
| E-DMM59 | Cdkn2a <sup>+/+</sup> _C57 | SIN.LV.SF.GFP | LIVER | 2 | 48789287 | + | NM_011958    | Orc4l         | - |
| E-DMM52 | Cdkn2a <sup>+/+</sup> _C57 | SIN.LV.SF.GFP | LIVER | 2 | 49343712 | - | NM_172663    | Epc2          | + |
| E-DMM48 | Cdkn2a <sup>+/+</sup> _C57 | SIN.LV.SF.GFP | LIVER | 2 | 49608693 | - | NM_008449    | Kif5c         | + |
| E-DMM65 | Cdkn2a <sup>+/+</sup> _C57 | SIN.LV.SF.GFP | LIVER | 2 | 51809959 | - | NM_001141948 | Nmi           | - |
| E-DMM63 | Cdkn2a <sup>+/+</sup> _C57 | SIN.LV.SF.GFP | LIVER | 2 | 51960095 | - | NM_175238    | Rif1          | + |
| E-DMM59 | Cdkn2a <sup>+/+</sup> _C57 | SIN.LV.SF.GFP | LIVER | 2 | 52810333 | + | NM_172409    | Fmnl2         | + |
| E-DMM57 | Cdkn2a <sup>+/+</sup> _C57 | SIN.LV.SF.GFP | LIVER | 2 | 53014183 | - | NM_018785    | Prpf40a       | - |
| E-DMM50 | Cdkn2a <sup>+/+</sup> _C57 | SIN.LV.SF.GFP | LIVER | 2 | 53018108 | + | NM_018785    | Prpf40a       | - |
| E-DMM48 | Cdkn2a <sup>+/+</sup> _C57 | SIN.LV.SF.GFP | LIVER | 2 | 53053535 | + | NM_022989    | Arl6ip6       | + |
| E-DMM52 | Cdkn2a <sup>+/+</sup> _C57 | SIN.LV.SF.GFP | LIVER | 2 | 53066883 | - | NM_022989    | Arl6ip6       | + |
| E-DMM58 | Cdkn2a <sup>+/+</sup> _C57 | SIN.LV.SF.GFP | LIVER | 2 | 57976135 | + | NM_139200    | Cytip         | - |
| E-DMM52 | Cdkn2a <sup>+/+</sup> _C57 | SIN.LV.SF.GFP | LIVER | 2 | 58383682 | - | NM_001110204 | Acvr1         | - |
| E-DMM57 | Cdkn2a <sup>+/+</sup> _C57 | SIN.LV.SF.GFP | LIVER | 2 | 59778997 | + | NM_001001182 | Baz2b         | - |
| E-DMM48 | Cdkn2a <sup>+/+</sup> _C57 | SIN.LV.SF.GFP | LIVER | 2 | 61551767 | - | NM_021526    | Psm14         | + |
| E-DMM48 | Cdkn2a <sup>+/+</sup> _C57 | SIN.LV.SF.GFP | LIVER | 2 | 61981737 | + | NM_033552    | Slc4a10       | + |
| E-DMM57 | Cdkn2a <sup>+/+</sup> _C57 | SIN.LV.SF.GFP | LIVER | 2 | 62380505 | + | NM_007986    | Fap           | - |
| E-DMM59 | Cdkn2a <sup>+/+</sup> _C57 | SIN.LV.SF.GFP | LIVER | 2 | 64982404 | + | NM_027225    | Cobll1        | - |
| E-DMM65 | Cdkn2a <sup>+/+</sup> _C57 | SIN.LV.SF.GFP | LIVER | 2 | 65361399 | + | NM_018732    | Scn3a         | - |
| E-DMM57 | Cdkn2a <sup>+/+</sup> _C57 | SIN.LV.SF.GFP | LIVER | 2 | 66041880 | - | NM_001047604 | Ttc21b        | - |
| E-DMM50 | Cdkn2a <sup>+/+</sup> _C57 | SIN.LV.SF.GFP | LIVER | 2 | 66249295 | - | NM_018733    | Scn1a         | - |
| E-DMM52 | Cdkn2a <sup>+/+</sup> _C57 | SIN.LV.SF.GFP | LIVER | 2 | 67448968 | + | NM_001024618 | Xirp2         | + |
| E-DMM55 | Cdkn2a <sup>+/+</sup> _C57 | SIN.LV.SF.GFP | LIVER | 2 | 67452784 | - | NM_001024618 | Xirp2         | + |
| E-DMM65 | Cdkn2a <sup>+/+</sup> _C57 | SIN.LV.SF.GFP | LIVER | 2 | 68752325 | - | NM_172856    | Lass6         | + |
| E-DMM49 | Cdkn2a <sup>+/+</sup> _C57 | SIN.LV.SF.GFP | LIVER | 2 | 70601664 | + | NM_172664    | Ttk1          | - |
| E-DMM58 | Cdkn2a <sup>+/+</sup> _C57 | SIN.LV.SF.GFP | LIVER | 2 | 70930730 | + | NM_198005    | 4833418A01Rik | + |
| E-DMM50 | Cdkn2a <sup>+/+</sup> _C57 | SIN.LV.SF.GFP | LIVER | 2 | 71068405 | - | NM_010064    | Dync1i2       | + |

|         |                            |               |       |   |           |   |              |               |   |
|---------|----------------------------|---------------|-------|---|-----------|---|--------------|---------------|---|
| E-DMM57 | Cdkn2a <sup>+/+</sup> _C57 | SIN.LV.SF.GFP | LIVER | 2 | 74390214  | - | NM_001110209 | Lnp           | - |
| E-DMM63 | Cdkn2a <sup>+/+</sup> _C57 | SIN.LV.SF.GFP | LIVER | 2 | 79346874  | - | NM_010894    | Neurod1       | - |
| E-DMM65 | Cdkn2a <sup>+/+</sup> _C57 | SIN.LV.SF.GFP | LIVER | 2 | 80162306  | + | NM_024181    | Dnajc10       | + |
| E-DMM63 | Cdkn2a <sup>+/+</sup> _C57 | SIN.LV.SF.GFP | LIVER | 2 | 80630391  | - | NM_027091    | Nup35         | + |
| E-DMM50 | Cdkn2a <sup>+/+</sup> _C57 | SIN.LV.SF.GFP | LIVER | 2 | 81726274  | + | NM_175513    | Zfp804a       | + |
| E-DMM52 | Cdkn2a <sup>+/+</sup> _C57 | SIN.LV.SF.GFP | LIVER | 2 | 83491021  | + | NM_026934    | Zc3h15        | + |
| E-DMM48 | Cdkn2a <sup>+/+</sup> _C57 | SIN.LV.SF.GFP | LIVER | 2 | 83699700  | - | NM_175514    | Fam171b       | + |
| E-DMM58 | Cdkn2a <sup>+/+</sup> _C57 | SIN.LV.SF.GFP | LIVER | 2 | 84248277  | + | NM_018782    | Calcr1        | - |
| E-DMM63 | Cdkn2a <sup>+/+</sup> _C57 | SIN.LV.SF.GFP | LIVER | 2 | 84906902  | + | NM_001081260 | Tnks1bp1      | + |
| E-DMM63 | Cdkn2a <sup>+/+</sup> _C57 | SIN.LV.SF.GFP | LIVER | 2 | 84906941  | - | NM_001081260 | Tnks1bp1      | + |
| E-DMM59 | Cdkn2a <sup>+/+</sup> _C57 | SIN.LV.SF.GFP | LIVER | 2 | 93989555  | + | NM_019657    | Hsd17b12      | - |
| E-DMM48 | Cdkn2a <sup>+/+</sup> _C57 | SIN.LV.SF.GFP | LIVER | 2 | 94255470  | + | NM_007466    | Api5          | - |
| E-DMM59 | Cdkn2a <sup>+/+</sup> _C57 | SIN.LV.SF.GFP | LIVER | 2 | 98503987  | + | NM_178725    | Lrrc4c        | + |
| E-DMM57 | Cdkn2a <sup>+/+</sup> _C57 | SIN.LV.SF.GFP | LIVER | 2 | 100800265 | + | NM_026592    | B230118H07Rik | - |
| E-DMM59 | Cdkn2a <sup>+/+</sup> _C57 | SIN.LV.SF.GFP | LIVER | 2 | 101401395 | - | NM_026592    | B230118H07Rik | - |
| E-DMM57 | Cdkn2a <sup>+/+</sup> _C57 | SIN.LV.SF.GFP | LIVER | 2 | 102167700 | - | NM_020267    | Trim44        | - |
| E-DMM52 | Cdkn2a <sup>+/+</sup> _C57 | SIN.LV.SF.GFP | LIVER | 2 | 102905652 | - | NM_175094    | Pdhx          | - |
| E-DMM63 | Cdkn2a <sup>+/+</sup> _C57 | SIN.LV.SF.GFP | LIVER | 2 | 103895850 | - | NM_212433    | Fbxo3         | + |
| E-DMM50 | Cdkn2a <sup>+/+</sup> _C57 | SIN.LV.SF.GFP | LIVER | 2 | 103896041 | + | NM_212433    | Fbxo3         | + |
| E-DMM58 | Cdkn2a <sup>+/+</sup> _C57 | SIN.LV.SF.GFP | LIVER | 2 | 104451482 | + | NM_177253    | Cstf3         | + |
| E-DMM52 | Cdkn2a <sup>+/+</sup> _C57 | SIN.LV.SF.GFP | LIVER | 2 | 104479919 | + | NM_145529    | Cstf3         | + |
| E-DMM63 | Cdkn2a <sup>+/+</sup> _C57 | SIN.LV.SF.GFP | LIVER | 2 | 109165439 | + | NM_139303    | Kif18a        | + |
| E-DMM49 | Cdkn2a <sup>+/+</sup> _C57 | SIN.LV.SF.GFP | LIVER | 2 | 110191027 | + | NM_026271    | Fibin         | - |
| E-DMM48 | Cdkn2a <sup>+/+</sup> _C57 | SIN.LV.SF.GFP | LIVER | 2 | 112557155 | - | NM_177652    | Ryr3          | - |
| E-DMM63 | Cdkn2a <sup>+/+</sup> _C57 | SIN.LV.SF.GFP | LIVER | 2 | 113963406 | + | NM_009702    | Aqr           | - |
| E-DMM50 | Cdkn2a <sup>+/+</sup> _C57 | SIN.LV.SF.GFP | LIVER | 2 | 113965046 | + | NM_009702    | Aqr           | - |
| E-DMM57 | Cdkn2a <sup>+/+</sup> _C57 | SIN.LV.SF.GFP | LIVER | 2 | 116993911 | + | NM_033524    | Spred1        | + |
| E-DMM58 | Cdkn2a <sup>+/+</sup> _C57 | SIN.LV.SF.GFP | LIVER | 2 | 116994666 | + | NM_033524    | Spred1        | + |
| E-DMM49 | Cdkn2a <sup>+/+</sup> _C57 | SIN.LV.SF.GFP | LIVER | 2 | 117886249 | - | NM_011580    | Thbs1         | + |
| E-DMM57 | Cdkn2a <sup>+/+</sup> _C57 | SIN.LV.SF.GFP | LIVER | 2 | 124720431 | - | NM_175034    | Slc24a5       | + |
| E-DMM48 | Cdkn2a <sup>+/+</sup> _C57 | SIN.LV.SF.GFP | LIVER | 2 | 124940109 | - | NM_010852    | Myef2         | - |

|         |                            |               |       |   |           |   |              |               |   |
|---------|----------------------------|---------------|-------|---|-----------|---|--------------|---------------|---|
| E-DMM59 | Cdkn2a <sup>+/+</sup> _C57 | SIN.LV.SF.GFP | LIVER | 2 | 125986693 | - | NM_026981    | Dtwd1         | + |
| E-DMM55 | Cdkn2a <sup>+/+</sup> _C57 | SIN.LV.SF.GFP | LIVER | 2 | 126367877 | + | NM_011978    | Slc27a2       | + |
| E-DMM57 | Cdkn2a <sup>+/+</sup> _C57 | SIN.LV.SF.GFP | LIVER | 2 | 132388250 | + | NM_001042671 | Prei4         | - |
| E-DMM52 | Cdkn2a <sup>+/+</sup> _C57 | SIN.LV.SF.GFP | LIVER | 2 | 134886361 | + | NM_001145830 | Plcb1         | + |
| E-DMM63 | Cdkn2a <sup>+/+</sup> _C57 | SIN.LV.SF.GFP | LIVER | 2 | 136734431 | + | NM_001038641 | 2210009G21Rik | + |
| E-DMM63 | Cdkn2a <sup>+/+</sup> _C57 | SIN.LV.SF.GFP | LIVER | 2 | 136734617 | - | NM_001038641 | 2210009G21Rik | + |
| E-DMM59 | Cdkn2a <sup>+/+</sup> _C57 | SIN.LV.SF.GFP | LIVER | 2 | 136813116 | - | NM_028834    | 2210009G21Rik | + |
| E-DMM49 | Cdkn2a <sup>+/+</sup> _C57 | SIN.LV.SF.GFP | LIVER | 2 | 138098895 | + | NM_001025431 | Btbd3         | + |
| E-DMM58 | Cdkn2a <sup>+/+</sup> _C57 | SIN.LV.SF.GFP | LIVER | 2 | 139721508 | - | NM_001159640 | Tasp1         | - |
| E-DMM65 | Cdkn2a <sup>+/+</sup> _C57 | SIN.LV.SF.GFP | LIVER | 2 | 139823769 | + | NM_175225    | Tasp1         | - |
| E-DMM50 | Cdkn2a <sup>+/+</sup> _C57 | SIN.LV.SF.GFP | LIVER | 2 | 140017807 | - | NM_027093    | 2310003L22Rik | + |
| E-DMM59 | Cdkn2a <sup>+/+</sup> _C57 | SIN.LV.SF.GFP | LIVER | 2 | 140282313 | - | NM_001013802 | MacroD2       | + |
| E-DMM52 | Cdkn2a <sup>+/+</sup> _C57 | SIN.LV.SF.GFP | LIVER | 2 | 140592221 | + | NM_001013802 | MacroD2       | + |
| E-DMM57 | Cdkn2a <sup>+/+</sup> _C57 | SIN.LV.SF.GFP | LIVER | 2 | 146247508 | - | NM_001033348 | A230067G21Rik | - |
| E-DMM58 | Cdkn2a <sup>+/+</sup> _C57 | SIN.LV.SF.GFP | LIVER | 2 | 150447452 | + | NM_080575    | Acss1         | - |
| E-DMM55 | Cdkn2a <sup>+/+</sup> _C57 | SIN.LV.SF.GFP | LIVER | 2 | 151789451 | + | NM_028666    | Fam110a       | - |
| E-DMM50 | Cdkn2a <sup>+/+</sup> _C57 | SIN.LV.SF.GFP | LIVER | 2 | 152690806 | + | NM_001141975 | Tpx2          | + |
| E-DMM58 | Cdkn2a <sup>+/+</sup> _C57 | SIN.LV.SF.GFP | LIVER | 2 | 164636831 | + | NM_178375    | Zswim3        | + |
| E-DMM50 | Cdkn2a <sup>+/+</sup> _C57 | SIN.LV.SF.GFP | LIVER | 2 | 165190838 | + | NM_001005425 | Gm1008        | - |
| E-DMM58 | Cdkn2a <sup>+/+</sup> _C57 | SIN.LV.SF.GFP | LIVER | 2 | 166818553 | - | NM_001109905 | Stau1         | - |
| E-DMM58 | Cdkn2a <sup>+/+</sup> _C57 | SIN.LV.SF.GFP | LIVER | 2 | 167891632 | - | NM_021409    | Pard6b        | + |
| E-DMM50 | Cdkn2a <sup>+/+</sup> _C57 | SIN.LV.SF.GFP | LIVER | 2 | 168016815 | + | NM_009628    | Adnp          | - |
| E-DMM63 | Cdkn2a <sup>+/+</sup> _C57 | SIN.LV.SF.GFP | LIVER | 2 | 168912083 | - | NM_009564    | Zfp64         | - |
| E-DMM52 | Cdkn2a <sup>+/+</sup> _C57 | SIN.LV.SF.GFP | LIVER | 2 | 174294461 | + | NM_025531    | Slmo2         | - |
| E-DMM63 | Cdkn2a <sup>+/+</sup> _C57 | SIN.LV.SF.GFP | LIVER | 2 | 177655685 | - | NM_028806    | Phactr3       | + |
| E-DMM49 | Cdkn2a <sup>+/+</sup> _C57 | SIN.LV.SF.GFP | LIVER | 2 | 178154984 | + | NM_001081289 | 9030418K01Rik | + |
| E-DMM50 | Cdkn2a <sup>+/+</sup> _C57 | SIN.LV.SF.GFP | LIVER | 3 | 3644928   | + | NM_013920    | Hnf4g         | + |
| E-DMM63 | Cdkn2a <sup>+/+</sup> _C57 | SIN.LV.SF.GFP | LIVER | 3 | 5254157   | - | NM_030708    | Zfhx4         | + |
| E-DMM63 | Cdkn2a <sup>+/+</sup> _C57 | SIN.LV.SF.GFP | LIVER | 3 | 5254330   | - | NM_030708    | Zfhx4         | + |
| E-DMM65 | Cdkn2a <sup>+/+</sup> _C57 | SIN.LV.SF.GFP | LIVER | 3 | 5370794   | + | NM_030708    | Zfhx4         | + |
| E-DMM49 | Cdkn2a <sup>+/+</sup> _C57 | SIN.LV.SF.GFP | LIVER | 3 | 5561025   | - | NM_008994    | Pxmp3         | - |

|         |                            |               |       |   |          |   |              |         |   |
|---------|----------------------------|---------------|-------|---|----------|---|--------------|---------|---|
| E-DMM57 | Cdkn2a <sup>+/+</sup> _C57 | SIN.LV.SF.GFP | LIVER | 3 | 5566989  | - | NM_008994    | Pxmp3   | - |
| E-DMM52 | Cdkn2a <sup>+/+</sup> _C57 | SIN.LV.SF.GFP | LIVER | 3 | 5601160  | + | NM_008994    | Pxmp3   | - |
| E-DMM63 | Cdkn2a <sup>+/+</sup> _C57 | SIN.LV.SF.GFP | LIVER | 3 | 7529432  | - | NM_173181    | Fam164a | + |
| E-DMM52 | Cdkn2a <sup>+/+</sup> _C57 | SIN.LV.SF.GFP | LIVER | 3 | 7621726  | + | NM_008371    | Ii7     | - |
| E-DMM50 | Cdkn2a <sup>+/+</sup> _C57 | SIN.LV.SF.GFP | LIVER | 3 | 8862163  | - | NM_025434    | Mrps28  | - |
| E-DMM63 | Cdkn2a <sup>+/+</sup> _C57 | SIN.LV.SF.GFP | LIVER | 3 | 9277797  | - | NM_133218    | Zfp704  | - |
| E-DMM63 | Cdkn2a <sup>+/+</sup> _C57 | SIN.LV.SF.GFP | LIVER | 3 | 9586644  | - | NM_133218    | Zfp704  | - |
| E-DMM50 | Cdkn2a <sup>+/+</sup> _C57 | SIN.LV.SF.GFP | LIVER | 3 | 10266497 | + | NM_029310    | Fabp12  | - |
| E-DMM52 | Cdkn2a <sup>+/+</sup> _C57 | SIN.LV.SF.GFP | LIVER | 3 | 15786236 | - | NM_001081687 | Gm5150  | - |
| E-DMM59 | Cdkn2a <sup>+/+</sup> _C57 | SIN.LV.SF.GFP | LIVER | 3 | 16118032 | - | NM_001145919 | Ythdf3  | + |
| E-DMM48 | Cdkn2a <sup>+/+</sup> _C57 | SIN.LV.SF.GFP | LIVER | 3 | 16265327 | - | NM_001145919 | Ythdf3  | + |
| E-DMM59 | Cdkn2a <sup>+/+</sup> _C57 | SIN.LV.SF.GFP | LIVER | 3 | 17985915 | - | NM_007825    | Cyp7b1  | - |
| E-DMM57 | Cdkn2a <sup>+/+</sup> _C57 | SIN.LV.SF.GFP | LIVER | 3 | 18214495 | + | NM_007825    | Cyp7b1  | - |
| E-DMM52 | Cdkn2a <sup>+/+</sup> _C57 | SIN.LV.SF.GFP | LIVER | 3 | 19098858 | + | NM_026182    | Mtfr1   | + |
| E-DMM57 | Cdkn2a <sup>+/+</sup> _C57 | SIN.LV.SF.GFP | LIVER | 3 | 19199036 | - | NM_001122759 | Pde7a   | - |
| E-DMM55 | Cdkn2a <sup>+/+</sup> _C57 | SIN.LV.SF.GFP | LIVER | 3 | 19204624 | + | NM_001122759 | Pde7a   | - |
| E-DMM52 | Cdkn2a <sup>+/+</sup> _C57 | SIN.LV.SF.GFP | LIVER | 3 | 19339298 | + | NM_025489    | Dnajc5b | + |
| E-DMM57 | Cdkn2a <sup>+/+</sup> _C57 | SIN.LV.SF.GFP | LIVER | 3 | 19987568 | + | NM_144959    | Hltf    | + |
| E-DMM63 | Cdkn2a <sup>+/+</sup> _C57 | SIN.LV.SF.GFP | LIVER | 3 | 20448157 | - | NM_175086    | Agtr1b  | - |
| E-DMM52 | Cdkn2a <sup>+/+</sup> _C57 | SIN.LV.SF.GFP | LIVER | 3 | 20934350 | - | NM_175086    | Agtr1b  | - |
| E-DMM65 | Cdkn2a <sup>+/+</sup> _C57 | SIN.LV.SF.GFP | LIVER | 3 | 21371276 | + | NM_030732    | Tbl1xr1 | + |
| E-DMM50 | Cdkn2a <sup>+/+</sup> _C57 | SIN.LV.SF.GFP | LIVER | 3 | 21821274 | - | NM_030732    | Tbl1xr1 | + |
| E-DMM50 | Cdkn2a <sup>+/+</sup> _C57 | SIN.LV.SF.GFP | LIVER | 3 | 21959939 | + | NM_030732    | Tbl1xr1 | + |
| E-DMM57 | Cdkn2a <sup>+/+</sup> _C57 | SIN.LV.SF.GFP | LIVER | 3 | 22053153 | + | NM_030732    | Tbl1xr1 | + |
| E-DMM52 | Cdkn2a <sup>+/+</sup> _C57 | SIN.LV.SF.GFP | LIVER | 3 | 23457013 | + | NR_004439    | Rprl2   | + |
| E-DMM63 | Cdkn2a <sup>+/+</sup> _C57 | SIN.LV.SF.GFP | LIVER | 3 | 24124757 | - | NM_138666    | Nlgn1   | - |
| E-DMM55 | Cdkn2a <sup>+/+</sup> _C57 | SIN.LV.SF.GFP | LIVER | 3 | 24413768 | + | NM_138666    | Nlgn1   | - |
| E-DMM52 | Cdkn2a <sup>+/+</sup> _C57 | SIN.LV.SF.GFP | LIVER | 3 | 24546652 | - | NM_138666    | Nlgn1   | - |
| E-DMM49 | Cdkn2a <sup>+/+</sup> _C57 | SIN.LV.SF.GFP | LIVER | 3 | 24726145 | + | NM_138666    | Nlgn1   | - |
| E-DMM58 | Cdkn2a <sup>+/+</sup> _C57 | SIN.LV.SF.GFP | LIVER | 3 | 28518985 | - | NM_031197    | Slc2a2  | + |
| E-DMM52 | Cdkn2a <sup>+/+</sup> _C57 | SIN.LV.SF.GFP | LIVER | 3 | 30777724 | + | NM_001134385 | Gpr160  | + |

|         |                            |               |       |   |          |   |              |               |   |
|---------|----------------------------|---------------|-------|---|----------|---|--------------|---------------|---|
| E-DMM52 | Cdkn2a <sup>+/+</sup> _C57 | SIN.LV.SF.GFP | LIVER | 3 | 30846176 | + | NM_153421    | Phc3          | - |
| E-DMM57 | Cdkn2a <sup>+/+</sup> _C57 | SIN.LV.SF.GFP | LIVER | 3 | 32349023 | + | NM_008839    | Pik3ca        | + |
| E-DMM47 | Cdkn2a <sup>+/+</sup> _C57 | SIN.LV.SF.GFP | LIVER | 3 | 33935237 | - | NM_001113188 | Fxr1          | + |
| E-DMM48 | Cdkn2a <sup>+/+</sup> _C57 | SIN.LV.SF.GFP | LIVER | 3 | 34982273 | - | NM_011443    | Sox2          | + |
| E-DMM65 | Cdkn2a <sup>+/+</sup> _C57 | SIN.LV.SF.GFP | LIVER | 3 | 35699172 | + | NM_029570    | Atp11b        | + |
| E-DMM52 | Cdkn2a <sup>+/+</sup> _C57 | SIN.LV.SF.GFP | LIVER | 3 | 35967737 | - | NM_172678    | Acad9         | + |
| E-DMM63 | Cdkn2a <sup>+/+</sup> _C57 | SIN.LV.SF.GFP | LIVER | 3 | 37707123 | + | NM_198657    | Gm5148        | - |
| E-DMM52 | Cdkn2a <sup>+/+</sup> _C57 | SIN.LV.SF.GFP | LIVER | 3 | 38363439 | - | NM_001033198 | Ankrd50       | - |
| E-DMM49 | Cdkn2a <sup>+/+</sup> _C57 | SIN.LV.SF.GFP | LIVER | 3 | 40494072 | - | NM_175515    | Intu          | + |
| E-DMM63 | Cdkn2a <sup>+/+</sup> _C57 | SIN.LV.SF.GFP | LIVER | 3 | 40718088 | + | NM_026622    | 3110057O12Rik | + |
| E-DMM63 | Cdkn2a <sup>+/+</sup> _C57 | SIN.LV.SF.GFP | LIVER | 3 | 40839080 | + | NM_027558    | Pgrmc2        | - |
| E-DMM59 | Cdkn2a <sup>+/+</sup> _C57 | SIN.LV.SF.GFP | LIVER | 3 | 42674658 | - | NM_001099785 | D3ErtD751e    | + |
| E-DMM49 | Cdkn2a <sup>+/+</sup> _C57 | SIN.LV.SF.GFP | LIVER | 3 | 44516624 | + | NM_001098170 | Pcdh10        | + |
| E-DMM48 | Cdkn2a <sup>+/+</sup> _C57 | SIN.LV.SF.GFP | LIVER | 3 | 48974002 | - | NR_003617    | 1700018B24Rik | - |
| E-DMM58 | Cdkn2a <sup>+/+</sup> _C57 | SIN.LV.SF.GFP | LIVER | 3 | 49844327 | - | NM_130448    | Pcdh18        | - |
| E-DMM59 | Cdkn2a <sup>+/+</sup> _C57 | SIN.LV.SF.GFP | LIVER | 3 | 50912607 | + | NM_009834    | Ccrn4l        | + |
| E-DMM63 | Cdkn2a <sup>+/+</sup> _C57 | SIN.LV.SF.GFP | LIVER | 3 | 52139124 | - | NM_019739    | Foxo1         | + |
| E-DMM64 | Cdkn2a <sup>+/+</sup> _C57 | SIN.LV.SF.GFP | LIVER | 3 | 52285528 | + | NM_019739    | Foxo1         | + |
| E-DMM52 | Cdkn2a <sup>+/+</sup> _C57 | SIN.LV.SF.GFP | LIVER | 3 | 52370761 | - | NM_019739    | Foxo1         | + |
| E-DMM57 | Cdkn2a <sup>+/+</sup> _C57 | SIN.LV.SF.GFP | LIVER | 3 | 54525890 | + | NM_019995    | Fam48a        | + |
| E-DMM58 | Cdkn2a <sup>+/+</sup> _C57 | SIN.LV.SF.GFP | LIVER | 3 | 57603672 | - | NM_011883    | Rnf13         | + |
| E-DMM48 | Cdkn2a <sup>+/+</sup> _C57 | SIN.LV.SF.GFP | LIVER | 3 | 57791577 | + | NM_019410    | Pfn2          | - |
| E-DMM57 | Cdkn2a <sup>+/+</sup> _C57 | SIN.LV.SF.GFP | LIVER | 3 | 58223865 | - | NM_001081229 | Tsc22d2       | + |
| E-DMM52 | Cdkn2a <sup>+/+</sup> _C57 | SIN.LV.SF.GFP | LIVER | 3 | 58334656 | - | NM_001005509 | Eif2a         | + |
| E-DMM52 | Cdkn2a <sup>+/+</sup> _C57 | SIN.LV.SF.GFP | LIVER | 3 | 59881057 | + | NM_032400    | Sucnr1        | + |
| E-DMM63 | Cdkn2a <sup>+/+</sup> _C57 | SIN.LV.SF.GFP | LIVER | 3 | 59897683 | + | NM_032400    | Sucnr1        | + |
| E-DMM48 | Cdkn2a <sup>+/+</sup> _C57 | SIN.LV.SF.GFP | LIVER | 3 | 60431860 | + | NM_020007    | Mbnl1         | + |
| E-DMM65 | Cdkn2a <sup>+/+</sup> _C57 | SIN.LV.SF.GFP | LIVER | 3 | 62780635 | + | NM_008604    | Mme           | + |
| E-DMM57 | Cdkn2a <sup>+/+</sup> _C57 | SIN.LV.SF.GFP | LIVER | 3 | 63753350 | + | NM_015728    | Slc33a1       | - |
| E-DMM58 | Cdkn2a <sup>+/+</sup> _C57 | SIN.LV.SF.GFP | LIVER | 3 | 63763287 | + | NM_015728    | Slc33a1       | - |
| E-DMM59 | Cdkn2a <sup>+/+</sup> _C57 | SIN.LV.SF.GFP | LIVER | 3 | 63804468 | + | NM_001033300 | Gmps          | + |



|         |                            |               |       |   |          |   |              |               |   |
|---------|----------------------------|---------------|-------|---|----------|---|--------------|---------------|---|
| E-DMM59 | Cdkn2a <sup>+/+</sup> _C57 | SIN.LV.SF.GFP | LIVER | 3 | 64806339 | - | NM_010597    | Kcnab1        | + |
| E-DMM52 | Cdkn2a <sup>+/+</sup> _C57 | SIN.LV.SF.GFP | LIVER | 3 | 66916782 | + | NM_025822    | Rsrc1         | + |
| E-DMM55 | Cdkn2a <sup>+/+</sup> _C57 | SIN.LV.SF.GFP | LIVER | 3 | 67257789 | - | NM_138591    | Gfm1          | + |
| E-DMM63 | Cdkn2a <sup>+/+</sup> _C57 | SIN.LV.SF.GFP | LIVER | 3 | 73430057 | + | NM_009738    | Bche          | - |
| E-DMM52 | Cdkn2a <sup>+/+</sup> _C57 | SIN.LV.SF.GFP | LIVER | 3 | 74410499 | + | NM_172515    | Zbbx          | - |
| E-DMM52 | Cdkn2a <sup>+/+</sup> _C57 | SIN.LV.SF.GFP | LIVER | 3 | 74447477 | - | NM_172515    | Zbbx          | - |
| E-DMM57 | Cdkn2a <sup>+/+</sup> _C57 | SIN.LV.SF.GFP | LIVER | 3 | 75352630 | - | NM_019745    | Pdcd10        | - |
| E-DMM57 | Cdkn2a <sup>+/+</sup> _C57 | SIN.LV.SF.GFP | LIVER | 3 | 75768991 | - | NM_175193    | Golim4        | - |
| E-DMM58 | Cdkn2a <sup>+/+</sup> _C57 | SIN.LV.SF.GFP | LIVER | 3 | 76412305 | - | NM_178673    | Fstl5         | + |
| E-DMM52 | Cdkn2a <sup>+/+</sup> _C57 | SIN.LV.SF.GFP | LIVER | 3 | 76423763 | - | NM_178673    | Fstl5         | + |
| E-DMM63 | Cdkn2a <sup>+/+</sup> _C57 | SIN.LV.SF.GFP | LIVER | 3 | 77714519 | - | NM_001099624 | Rapgef2       | - |
| E-DMM55 | Cdkn2a <sup>+/+</sup> _C57 | SIN.LV.SF.GFP | LIVER | 3 | 77899803 | + | NM_001099624 | Rapgef2       | - |
| E-DMM65 | Cdkn2a <sup>+/+</sup> _C57 | SIN.LV.SF.GFP | LIVER | 3 | 78860073 | - | NM_001099624 | Rapgef2       | - |
| E-DMM59 | Cdkn2a <sup>+/+</sup> _C57 | SIN.LV.SF.GFP | LIVER | 3 | 78926116 | - | NM_001099624 | Rapgef2       | - |
| E-DMM52 | Cdkn2a <sup>+/+</sup> _C57 | SIN.LV.SF.GFP | LIVER | 3 | 79026261 | - | NM_001099624 | Rapgef2       | - |
| E-DMM49 | Cdkn2a <sup>+/+</sup> _C57 | SIN.LV.SF.GFP | LIVER | 3 | 79633027 | - | NM_027495    | Tmem144       | - |
| E-DMM58 | Cdkn2a <sup>+/+</sup> _C57 | SIN.LV.SF.GFP | LIVER | 3 | 79845812 | - | NM_133187    | 1110032E23Rik | + |
| E-DMM57 | Cdkn2a <sup>+/+</sup> _C57 | SIN.LV.SF.GFP | LIVER | 3 | 81750954 | + | NM_177662    | Ctso          | + |
| E-DMM49 | Cdkn2a <sup>+/+</sup> _C57 | SIN.LV.SF.GFP | LIVER | 3 | 81816242 | + | NM_021370    | Accn5         | + |
| E-DMM57 | Cdkn2a <sup>+/+</sup> _C57 | SIN.LV.SF.GFP | LIVER | 3 | 82600804 | + | NM_001146328 | Rbm46         | - |
| E-DMM48 | Cdkn2a <sup>+/+</sup> _C57 | SIN.LV.SF.GFP | LIVER | 3 | 82761643 | + | NM_133862    | Fgg           | + |
| E-DMM52 | Cdkn2a <sup>+/+</sup> _C57 | SIN.LV.SF.GFP | LIVER | 3 | 83912412 | + | NM_029797    | Mnd1          | - |
| E-DMM59 | Cdkn2a <sup>+/+</sup> _C57 | SIN.LV.SF.GFP | LIVER | 3 | 86124610 | + | NM_001077687 | Lrba          | + |
| E-DMM52 | Cdkn2a <sup>+/+</sup> _C57 | SIN.LV.SF.GFP | LIVER | 3 | 86169689 | + | NM_001077687 | Lrba          | + |
| E-DMM58 | Cdkn2a <sup>+/+</sup> _C57 | SIN.LV.SF.GFP | LIVER | 3 | 87854199 | + | NM_001110809 | Gpatch4       | + |
| E-DMM58 | Cdkn2a <sup>+/+</sup> _C57 | SIN.LV.SF.GFP | LIVER | 3 | 87854275 | - | NM_001110809 | Gpatch4       | + |
| E-DMM52 | Cdkn2a <sup>+/+</sup> _C57 | SIN.LV.SF.GFP | LIVER | 3 | 93385488 | - | NM_009112    | S100a10       | + |
| E-DMM59 | Cdkn2a <sup>+/+</sup> _C57 | SIN.LV.SF.GFP | LIVER | 3 | 94124778 | + | NM_029431    | Them4         | + |
| E-DMM52 | Cdkn2a <sup>+/+</sup> _C57 | SIN.LV.SF.GFP | LIVER | 3 | 96596529 | - | NM_026406    | Rnf115        | + |
| E-DMM59 | Cdkn2a <sup>+/+</sup> _C57 | SIN.LV.SF.GFP | LIVER | 3 | 97643861 | - | NM_177145    | Pde4dip       | - |
| E-DMM50 | Cdkn2a <sup>+/+</sup> _C57 | SIN.LV.SF.GFP | LIVER | 3 | 98951774 | + | NM_027462    | Wars2         | + |

|         |                            |               |       |   |           |   |              |               |   |
|---------|----------------------------|---------------|-------|---|-----------|---|--------------|---------------|---|
| E-DMM52 | Cdkn2a <sup>+/+</sup> _C57 | SIN.LV.SF.GFP | LIVER | 3 | 103244599 | - | NM_001079830 | Trim33        | + |
| E-DMM57 | Cdkn2a <sup>+/+</sup> _C57 | SIN.LV.SF.GFP | LIVER | 3 | 103900476 | + | NM_001159354 | Magi3         | - |
| E-DMM52 | Cdkn2a <sup>+/+</sup> _C57 | SIN.LV.SF.GFP | LIVER | 3 | 105580199 | - | NM_145541    | Rap1a         | - |
| E-DMM52 | Cdkn2a <sup>+/+</sup> _C57 | SIN.LV.SF.GFP | LIVER | 3 | 107929572 | - | NM_010306    | Gnai3         | - |
| E-DMM50 | Cdkn2a <sup>+/+</sup> _C57 | SIN.LV.SF.GFP | LIVER | 3 | 112953508 | + | NM_009669    | Amy2a5        | - |
| E-DMM48 | Cdkn2a <sup>+/+</sup> _C57 | SIN.LV.SF.GFP | LIVER | 3 | 113325628 | + | NM_001038696 | Rnpc3         | - |
| E-DMM50 | Cdkn2a <sup>+/+</sup> _C57 | SIN.LV.SF.GFP | LIVER | 3 | 116856901 | - | NM_177664    | D3Bwg0562e    | - |
| E-DMM59 | Cdkn2a <sup>+/+</sup> _C57 | SIN.LV.SF.GFP | LIVER | 3 | 117124806 | - | NM_177664    | D3Bwg0562e    | - |
| E-DMM57 | Cdkn2a <sup>+/+</sup> _C57 | SIN.LV.SF.GFP | LIVER | 3 | 119439623 | + | NM_019550    | Ptbp2         | - |
| E-DMM58 | Cdkn2a <sup>+/+</sup> _C57 | SIN.LV.SF.GFP | LIVER | 3 | 119501504 | - | NM_019550    | Ptbp2         | - |
| E-DMM49 | Cdkn2a <sup>+/+</sup> _C57 | SIN.LV.SF.GFP | LIVER | 3 | 121508872 | + | NM_008991    | Abcd3         | - |
| E-DMM57 | Cdkn2a <sup>+/+</sup> _C57 | SIN.LV.SF.GFP | LIVER | 3 | 122642637 | - | NM_133857    | Usp53         | - |
| E-DMM58 | Cdkn2a <sup>+/+</sup> _C57 | SIN.LV.SF.GFP | LIVER | 3 | 122686747 | - | NM_133857    | Usp53         | - |
| E-DMM63 | Cdkn2a <sup>+/+</sup> _C57 | SIN.LV.SF.GFP | LIVER | 3 | 123045998 | - | NM_027135    | Sec24d        | + |
| E-DMM57 | Cdkn2a <sup>+/+</sup> _C57 | SIN.LV.SF.GFP | LIVER | 3 | 124385193 | - | NM_027939    | 1700006A11Rik | - |
| E-DMM58 | Cdkn2a <sup>+/+</sup> _C57 | SIN.LV.SF.GFP | LIVER | 3 | 126383890 | + | NM_001025438 | Camk2d        | + |
| E-DMM59 | Cdkn2a <sup>+/+</sup> _C57 | SIN.LV.SF.GFP | LIVER | 3 | 131362532 | - | NM_011863    | Papss1        | + |
| E-DMM55 | Cdkn2a <sup>+/+</sup> _C57 | SIN.LV.SF.GFP | LIVER | 3 | 131535733 | + | NM_020265    | Dkk2          | + |
| E-DMM48 | Cdkn2a <sup>+/+</sup> _C57 | SIN.LV.SF.GFP | LIVER | 3 | 131962088 | - | NM_020265    | Dkk2          | + |
| E-DMM58 | Cdkn2a <sup>+/+</sup> _C57 | SIN.LV.SF.GFP | LIVER | 3 | 132357430 | + | NM_173032    | A630047E20Rik | + |
| E-DMM59 | Cdkn2a <sup>+/+</sup> _C57 | SIN.LV.SF.GFP | LIVER | 3 | 132440909 | + | NM_173032    | A630047E20Rik | + |
| E-DMM58 | Cdkn2a <sup>+/+</sup> _C57 | SIN.LV.SF.GFP | LIVER | 3 | 133136891 | - | NM_001040400 | Tet2          | - |
| E-DMM57 | Cdkn2a <sup>+/+</sup> _C57 | SIN.LV.SF.GFP | LIVER | 3 | 133200289 | + | NM_001040400 | Tet2          | - |
| E-DMM48 | Cdkn2a <sup>+/+</sup> _C57 | SIN.LV.SF.GFP | LIVER | 3 | 133400487 | - | NM_001040400 | Tet2          | - |
| E-DMM55 | Cdkn2a <sup>+/+</sup> _C57 | SIN.LV.SF.GFP | LIVER | 3 | 135093469 | + | NM_025902    | Cisd2         | - |
| E-DMM55 | Cdkn2a <sup>+/+</sup> _C57 | SIN.LV.SF.GFP | LIVER | 3 | 136435750 | + | NM_008913    | Ppp3ca        | + |
| E-DMM50 | Cdkn2a <sup>+/+</sup> _C57 | SIN.LV.SF.GFP | LIVER | 3 | 136526618 | + | NM_008913    | Ppp3ca        | + |
| E-DMM57 | Cdkn2a <sup>+/+</sup> _C57 | SIN.LV.SF.GFP | LIVER | 3 | 138215019 | - | NM_007917    | Eif4e         | + |
| E-DMM49 | Cdkn2a <sup>+/+</sup> _C57 | SIN.LV.SF.GFP | LIVER | 3 | 138729451 | + | NM_001040690 | Rap1gds1      | - |
| E-DMM52 | Cdkn2a <sup>+/+</sup> _C57 | SIN.LV.SF.GFP | LIVER | 3 | 141906674 | + | NM_019808    | Pdlim5        | - |
| E-DMM49 | Cdkn2a <sup>+/+</sup> _C57 | SIN.LV.SF.GFP | LIVER | 3 | 141922155 | + | NM_019808    | Pdlim5        | - |

|         |                            |               |       |   |           |   |              |               |   |
|---------|----------------------------|---------------|-------|---|-----------|---|--------------|---------------|---|
| E-DMM55 | Cdkn2a <sup>+/+</sup> _C57 | SIN.LV.SF.GFP | LIVER | 3 | 141925933 | - | NM_019808    | Pdlim5        | - |
| E-DMM50 | Cdkn2a <sup>+/+</sup> _C57 | SIN.LV.SF.GFP | LIVER | 3 | 141982176 | - | NM_019809    | Pdlim5        | - |
| E-DMM58 | Cdkn2a <sup>+/+</sup> _C57 | SIN.LV.SF.GFP | LIVER | 3 | 142167834 | - | NM_153564    | Gbp5          | + |
| E-DMM48 | Cdkn2a <sup>+/+</sup> _C57 | SIN.LV.SF.GFP | LIVER | 3 | 142466350 | + | NM_178654    | Pkn2          | - |
| E-DMM59 | Cdkn2a <sup>+/+</sup> _C57 | SIN.LV.SF.GFP | LIVER | 3 | 143408627 | + | NM_010723    | Lmo4          | - |
| E-DMM52 | Cdkn2a <sup>+/+</sup> _C57 | SIN.LV.SF.GFP | LIVER | 3 | 146120320 | + | NM_027617    | Spata1        | - |
| E-DMM57 | Cdkn2a <sup>+/+</sup> _C57 | SIN.LV.SF.GFP | LIVER | 3 | 146160289 | - | NM_027617    | Spata1        | - |
| E-DMM63 | Cdkn2a <sup>+/+</sup> _C57 | SIN.LV.SF.GFP | LIVER | 3 | 148485079 | + | NM_001081298 | Lphn2         | - |
| E-DMM63 | Cdkn2a <sup>+/+</sup> _C57 | SIN.LV.SF.GFP | LIVER | 3 | 148888744 | + | NM_001081298 | Lphn2         | - |
| E-DMM47 | Cdkn2a <sup>+/+</sup> _C57 | SIN.LV.SF.GFP | LIVER | 3 | 150033920 | + | NM_133222    | Elt1          | + |
| E-DMM57 | Cdkn2a <sup>+/+</sup> _C57 | SIN.LV.SF.GFP | LIVER | 3 | 150814108 | - | NM_133222    | Elt1          | + |
| E-DMM63 | Cdkn2a <sup>+/+</sup> _C57 | SIN.LV.SF.GFP | LIVER | 3 | 151796918 | - | NM_016867    | Gipc2         | - |
| E-DMM63 | Cdkn2a <sup>+/+</sup> _C57 | SIN.LV.SF.GFP | LIVER | 3 | 153238479 | - | NM_011372    | St6galnac3    | - |
| E-DMM55 | Cdkn2a <sup>+/+</sup> _C57 | SIN.LV.SF.GFP | LIVER | 3 | 155629587 | - | NM_001039094 | Negr1         | + |
| E-DMM55 | Cdkn2a <sup>+/+</sup> _C57 | SIN.LV.SF.GFP | LIVER | 3 | 155640995 | - | NM_001039094 | Negr1         | + |
| E-DMM52 | Cdkn2a <sup>+/+</sup> _C57 | SIN.LV.SF.GFP | LIVER | 3 | 156484815 | + | NM_177274    | Negr1         | + |
| E-DMM52 | Cdkn2a <sup>+/+</sup> _C57 | SIN.LV.SF.GFP | LIVER | 3 | 159184428 | - | NM_029523    | Depdc1a       | + |
| E-DMM57 | Cdkn2a <sup>+/+</sup> _C57 | SIN.LV.SF.GFP | LIVER | 4 | 3481622   | + | NM_028097    | Tmem68        | - |
| E-DMM59 | Cdkn2a <sup>+/+</sup> _C57 | SIN.LV.SF.GFP | LIVER | 4 | 3528320   | - | NM_054089    | Tgs1          | + |
| E-DMM58 | Cdkn2a <sup>+/+</sup> _C57 | SIN.LV.SF.GFP | LIVER | 4 | 3746771   | - | NM_026147    | Rps20         | - |
| E-DMM50 | Cdkn2a <sup>+/+</sup> _C57 | SIN.LV.SF.GFP | LIVER | 4 | 4706982   | + | NM_177730    | Impad1        | - |
| E-DMM63 | Cdkn2a <sup>+/+</sup> _C57 | SIN.LV.SF.GFP | LIVER | 4 | 5457752   | - | NM_173426    | Fam110b       | + |
| E-DMM48 | Cdkn2a <sup>+/+</sup> _C57 | SIN.LV.SF.GFP | LIVER | 4 | 6357585   | + | NM_010945    | Nsmf          | - |
| E-DMM58 | Cdkn2a <sup>+/+</sup> _C57 | SIN.LV.SF.GFP | LIVER | 4 | 6788613   | - | NM_145711    | Tox           | - |
| E-DMM52 | Cdkn2a <sup>+/+</sup> _C57 | SIN.LV.SF.GFP | LIVER | 4 | 7366699   | - | NM_145711    | Tox           | - |
| E-DMM65 | Cdkn2a <sup>+/+</sup> _C57 | SIN.LV.SF.GFP | LIVER | 4 | 8171314   | - | NM_007592    | Car8          | - |
| E-DMM48 | Cdkn2a <sup>+/+</sup> _C57 | SIN.LV.SF.GFP | LIVER | 4 | 8706369   | - | NM_001081417 | Chd7          | + |
| E-DMM63 | Cdkn2a <sup>+/+</sup> _C57 | SIN.LV.SF.GFP | LIVER | 4 | 8736709   | - | NM_001081417 | Chd7          | + |
| E-DMM55 | Cdkn2a <sup>+/+</sup> _C57 | SIN.LV.SF.GFP | LIVER | 4 | 8740520   | - | NM_001081417 | Chd7          | + |
| E-DMM52 | Cdkn2a <sup>+/+</sup> _C57 | SIN.LV.SF.GFP | LIVER | 4 | 9573959   | + | NM_023066    | Asph          | - |
| E-DMM59 | Cdkn2a <sup>+/+</sup> _C57 | SIN.LV.SF.GFP | LIVER | 4 | 10615916  | + | NM_026005    | 2610301B20Rik | + |

|         |                            |               |       |   |          |   |              |               |   |
|---------|----------------------------|---------------|-------|---|----------|---|--------------|---------------|---|
| E-DMM50 | Cdkn2a <sup>+/+</sup> _C57 | SIN.LV.SF.GFP | LIVER | 4 | 11094442 | - | NM_021897    | Trp53inp1     | + |
| E-DMM52 | Cdkn2a <sup>+/+</sup> _C57 | SIN.LV.SF.GFP | LIVER | 4 | 11970225 | - | NM_177861    | Tmem67        | - |
| E-DMM50 | Cdkn2a <sup>+/+</sup> _C57 | SIN.LV.SF.GFP | LIVER | 4 | 13032317 | + | NM_173746    | Gml1818       | + |
| E-DMM50 | Cdkn2a <sup>+/+</sup> _C57 | SIN.LV.SF.GFP | LIVER | 4 | 14955267 | - | NM_178617    | Necab1        | - |
| E-DMM63 | Cdkn2a <sup>+/+</sup> _C57 | SIN.LV.SF.GFP | LIVER | 4 | 15163210 | - | NM_181401    | Tmem64        | + |
| E-DMM50 | Cdkn2a <sup>+/+</sup> _C57 | SIN.LV.SF.GFP | LIVER | 4 | 15206167 | - | NM_181401    | Tmem64        | + |
| E-DMM63 | Cdkn2a <sup>+/+</sup> _C57 | SIN.LV.SF.GFP | LIVER | 4 | 15209321 | - | NM_181401    | Tmem64        | + |
| E-DMM58 | Cdkn2a <sup>+/+</sup> _C57 | SIN.LV.SF.GFP | LIVER | 4 | 15903997 | - | NM_013752    | Nbn           | + |
| E-DMM48 | Cdkn2a <sup>+/+</sup> _C57 | SIN.LV.SF.GFP | LIVER | 4 | 17876469 | - | NM_019724    | Mmp16         | + |
| E-DMM65 | Cdkn2a <sup>+/+</sup> _C57 | SIN.LV.SF.GFP | LIVER | 4 | 19535146 | - | NM_025476    | Fam82b        | + |
| E-DMM59 | Cdkn2a <sup>+/+</sup> _C57 | SIN.LV.SF.GFP | LIVER | 4 | 19782558 | + | NM_028746    | Slc7a13       | + |
| E-DMM50 | Cdkn2a <sup>+/+</sup> _C57 | SIN.LV.SF.GFP | LIVER | 4 | 20327083 | + | NM_172987    | Nkain3        | - |
| E-DMM57 | Cdkn2a <sup>+/+</sup> _C57 | SIN.LV.SF.GFP | LIVER | 4 | 20916449 | - | NM_172987    | Nkain3        | - |
| E-DMM52 | Cdkn2a <sup>+/+</sup> _C57 | SIN.LV.SF.GFP | LIVER | 4 | 21750550 | + | NM_152825    | Usp45         | + |
| E-DMM65 | Cdkn2a <sup>+/+</sup> _C57 | SIN.LV.SF.GFP | LIVER | 4 | 24459879 | - | NM_199467    | F730047E07Rik | + |
| E-DMM58 | Cdkn2a <sup>+/+</sup> _C57 | SIN.LV.SF.GFP | LIVER | 4 | 24478121 | - | NM_199467    | F730047E07Rik | + |
| E-DMM55 | Cdkn2a <sup>+/+</sup> _C57 | SIN.LV.SF.GFP | LIVER | 4 | 24482651 | + | NM_199467    | F730047E07Rik | + |
| E-DMM55 | Cdkn2a <sup>+/+</sup> _C57 | SIN.LV.SF.GFP | LIVER | 4 | 25376276 | - | NM_010243    | Fut9          | - |
| E-DMM52 | Cdkn2a <sup>+/+</sup> _C57 | SIN.LV.SF.GFP | LIVER | 4 | 25466161 | - | NM_010243    | Fut9          | - |
| E-DMM57 | Cdkn2a <sup>+/+</sup> _C57 | SIN.LV.SF.GFP | LIVER | 4 | 26259507 | + | NM_172865    | Manea         | - |
| E-DMM48 | Cdkn2a <sup>+/+</sup> _C57 | SIN.LV.SF.GFP | LIVER | 4 | 30620830 | + | NM_172688    | Map3k7        | + |
| E-DMM59 | Cdkn2a <sup>+/+</sup> _C57 | SIN.LV.SF.GFP | LIVER | 4 | 31340077 | + | NM_172688    | Map3k7        | + |
| E-DMM63 | Cdkn2a <sup>+/+</sup> _C57 | SIN.LV.SF.GFP | LIVER | 4 | 31808145 | - | NM_172688    | Map3k7        | + |
| E-DMM58 | Cdkn2a <sup>+/+</sup> _C57 | SIN.LV.SF.GFP | LIVER | 4 | 33360808 | + | NM_001033225 | Pnrc1         | - |
| E-DMM52 | Cdkn2a <sup>+/+</sup> _C57 | SIN.LV.SF.GFP | LIVER | 4 | 33406471 | - | NM_011884    | Rngtt         | + |
| E-DMM55 | Cdkn2a <sup>+/+</sup> _C57 | SIN.LV.SF.GFP | LIVER | 4 | 34772526 | + | NM_013889    | Zfp292        | - |
| E-DMM63 | Cdkn2a <sup>+/+</sup> _C57 | SIN.LV.SF.GFP | LIVER | 4 | 34793195 | - | NM_013889    | Zfp292        | - |
| E-DMM65 | Cdkn2a <sup>+/+</sup> _C57 | SIN.LV.SF.GFP | LIVER | 4 | 35879876 | + | NM_175516    | Lingo2        | - |
| E-DMM50 | Cdkn2a <sup>+/+</sup> _C57 | SIN.LV.SF.GFP | LIVER | 4 | 35950783 | - | NM_175516    | Lingo2        | - |
| E-DMM50 | Cdkn2a <sup>+/+</sup> _C57 | SIN.LV.SF.GFP | LIVER | 4 | 36887261 | - | NM_175516    | Lingo2        | - |
| E-DMM63 | Cdkn2a <sup>+/+</sup> _C57 | SIN.LV.SF.GFP | LIVER | 4 | 38584405 | + | NM_001081095 | 1700009N14Rik | + |

|         |                            |               |       |   |          |   |              |               |   |
|---------|----------------------------|---------------|-------|---|----------|---|--------------|---------------|---|
| E-DMM50 | Cdkn2a <sup>+/+</sup> _C57 | SIN.LV.SF.GFP | LIVER | 4 | 39450437 | + | NM_001081095 | 1700009N14Rik | + |
| E-DMM57 | Cdkn2a <sup>+/+</sup> _C57 | SIN.LV.SF.GFP | LIVER | 4 | 43407960 | + | NM_001037709 | Rusc2         | + |
| E-DMM55 | Cdkn2a <sup>+/+</sup> _C57 | SIN.LV.SF.GFP | LIVER | 4 | 43921574 | + | NM_016678    | Reck          | + |
| E-DMM52 | Cdkn2a <sup>+/+</sup> _C57 | SIN.LV.SF.GFP | LIVER | 4 | 47382525 | + | NM_009370    | Tgfr1         | + |
| E-DMM52 | Cdkn2a <sup>+/+</sup> _C57 | SIN.LV.SF.GFP | LIVER | 4 | 48254163 | + | NM_029572    | Erp44         | - |
| E-DMM55 | Cdkn2a <sup>+/+</sup> _C57 | SIN.LV.SF.GFP | LIVER | 4 | 49200320 | - | NM_178756    | E130309F12Rik | + |
| E-DMM63 | Cdkn2a <sup>+/+</sup> _C57 | SIN.LV.SF.GFP | LIVER | 4 | 56332325 | + | NM_025271    | Actl7b        | - |
| E-DMM59 | Cdkn2a <sup>+/+</sup> _C57 | SIN.LV.SF.GFP | LIVER | 4 | 56930799 | + | NM_175518    | D730040F13Rik | - |
| E-DMM50 | Cdkn2a <sup>+/+</sup> _C57 | SIN.LV.SF.GFP | LIVER | 4 | 58853334 | - | NM_172381    | AI314180      | - |
| E-DMM59 | Cdkn2a <sup>+/+</sup> _C57 | SIN.LV.SF.GFP | LIVER | 4 | 58914293 | - | NM_172381    | AI314180      | - |
| E-DMM52 | Cdkn2a <sup>+/+</sup> _C57 | SIN.LV.SF.GFP | LIVER | 4 | 59544987 | - | NM_144904    | Rod1          | - |
| E-DMM50 | Cdkn2a <sup>+/+</sup> _C57 | SIN.LV.SF.GFP | LIVER | 4 | 59558322 | - | NM_144904    | Rod1          | - |
| E-DMM55 | Cdkn2a <sup>+/+</sup> _C57 | SIN.LV.SF.GFP | LIVER | 4 | 59794967 | + | NM_001013577 | 1110054O05Rik | - |
| E-DMM58 | Cdkn2a <sup>+/+</sup> _C57 | SIN.LV.SF.GFP | LIVER | 4 | 62080848 | - | NM_027297    | Prpf4         | + |
| E-DMM57 | Cdkn2a <sup>+/+</sup> _C57 | SIN.LV.SF.GFP | LIVER | 4 | 66515499 | - | NM_021297    | Tlr4          | + |
| E-DMM57 | Cdkn2a <sup>+/+</sup> _C57 | SIN.LV.SF.GFP | LIVER | 4 | 66556982 | + | NM_021297    | Tlr4          | + |
| E-DMM52 | Cdkn2a <sup>+/+</sup> _C57 | SIN.LV.SF.GFP | LIVER | 4 | 68139998 | + | NM_019967    | Dbc1          | - |
| E-DMM59 | Cdkn2a <sup>+/+</sup> _C57 | SIN.LV.SF.GFP | LIVER | 4 | 70947568 | + | NM_172694    | Megf9         | - |
| E-DMM59 | Cdkn2a <sup>+/+</sup> _C57 | SIN.LV.SF.GFP | LIVER | 4 | 71336074 | - | NM_011599    | Tle1          | - |
| E-DMM52 | Cdkn2a <sup>+/+</sup> _C57 | SIN.LV.SF.GFP | LIVER | 4 | 71350244 | - | NM_011599    | Tle1          | - |
| E-DMM63 | Cdkn2a <sup>+/+</sup> _C57 | SIN.LV.SF.GFP | LIVER | 4 | 71781348 | - | NM_011599    | Tle1          | - |
| E-DMM57 | Cdkn2a <sup>+/+</sup> _C57 | SIN.LV.SF.GFP | LIVER | 4 | 73921907 | + | NM_144787    | Kdm4c         | + |
| E-DMM57 | Cdkn2a <sup>+/+</sup> _C57 | SIN.LV.SF.GFP | LIVER | 4 | 73948829 | - | NM_144787    | Kdm4c         | + |
| E-DMM57 | Cdkn2a <sup>+/+</sup> _C57 | SIN.LV.SF.GFP | LIVER | 4 | 74027104 | - | NM_144787    | Kdm4c         | + |
| E-DMM58 | Cdkn2a <sup>+/+</sup> _C57 | SIN.LV.SF.GFP | LIVER | 4 | 74918230 | + | NM_025849    | 3110001D03Rik | - |
| E-DMM50 | Cdkn2a <sup>+/+</sup> _C57 | SIN.LV.SF.GFP | LIVER | 4 | 74946001 | - | NM_025849    | 3110001D03Rik | - |
| E-DMM65 | Cdkn2a <sup>+/+</sup> _C57 | SIN.LV.SF.GFP | LIVER | 4 | 75075335 | + | NM_025849    | 3110001D03Rik | - |
| E-DMM52 | Cdkn2a <sup>+/+</sup> _C57 | SIN.LV.SF.GFP | LIVER | 4 | 76552190 | + | NM_011211    | Ptprd         | - |
| E-DMM63 | Cdkn2a <sup>+/+</sup> _C57 | SIN.LV.SF.GFP | LIVER | 4 | 77382382 | - | NM_011211    | Ptprd         | - |
| E-DMM63 | Cdkn2a <sup>+/+</sup> _C57 | SIN.LV.SF.GFP | LIVER | 4 | 77407408 | + | NM_011211    | Ptprd         | - |
| E-DMM65 | Cdkn2a <sup>+/+</sup> _C57 | SIN.LV.SF.GFP | LIVER | 4 | 79973027 | + | NM_031202    | Tyrp1         | + |

|         |                            |               |       |   |           |   |              |          |   |
|---------|----------------------------|---------------|-------|---|-----------|---|--------------|----------|---|
| E-DMM57 | Cdkn2a <sup>+/+</sup> _C57 | SIN.LV.SF.GFP | LIVER | 4 | 82897163  | + | NM_027238    | Ttc39b   | - |
| E-DMM50 | Cdkn2a <sup>+/+</sup> _C57 | SIN.LV.SF.GFP | LIVER | 4 | 83105247  | + | NM_133948    | Psip1    | - |
| E-DMM50 | Cdkn2a <sup>+/+</sup> _C57 | SIN.LV.SF.GFP | LIVER | 4 | 85390055  | - | NM_029967    | Adamts1l | + |
| E-DMM63 | Cdkn2a <sup>+/+</sup> _C57 | SIN.LV.SF.GFP | LIVER | 4 | 86452805  | + | NM_001081014 | Dennd4c  | + |
| E-DMM57 | Cdkn2a <sup>+/+</sup> _C57 | SIN.LV.SF.GFP | LIVER | 4 | 88365331  | - | NM_172871    | Klh9     | - |
| E-DMM55 | Cdkn2a <sup>+/+</sup> _C57 | SIN.LV.SF.GFP | LIVER | 4 | 90163800  | + | NM_153102    | Zfp352   | + |
| E-DMM57 | Cdkn2a <sup>+/+</sup> _C57 | SIN.LV.SF.GFP | LIVER | 4 | 94253431  | - | NM_172695    | Plaa     | - |
| E-DMM57 | Cdkn2a <sup>+/+</sup> _C57 | SIN.LV.SF.GFP | LIVER | 4 | 95152496  | + | NM_001113412 | Fggy     | + |
| E-DMM59 | Cdkn2a <sup>+/+</sup> _C57 | SIN.LV.SF.GFP | LIVER | 4 | 95589585  | - | NM_001113412 | Fggy     | + |
| E-DMM48 | Cdkn2a <sup>+/+</sup> _C57 | SIN.LV.SF.GFP | LIVER | 4 | 95694807  | - | NM_030014    | Hook1    | + |
| E-DMM48 | Cdkn2a <sup>+/+</sup> _C57 | SIN.LV.SF.GFP | LIVER | 4 | 96816390  | + | NM_001081284 | Gm12695  | - |
| E-DMM58 | Cdkn2a <sup>+/+</sup> _C57 | SIN.LV.SF.GFP | LIVER | 4 | 97621563  | + | NM_001122952 | Nfia     | + |
| E-DMM50 | Cdkn2a <sup>+/+</sup> _C57 | SIN.LV.SF.GFP | LIVER | 4 | 102253269 | + | NM_019840    | Pde4b    | + |
| E-DMM63 | Cdkn2a <sup>+/+</sup> _C57 | SIN.LV.SF.GFP | LIVER | 4 | 103693079 | + | NM_010014    | Dab1     | + |
| E-DMM52 | Cdkn2a <sup>+/+</sup> _C57 | SIN.LV.SF.GFP | LIVER | 4 | 105539349 | - | NM_153565    | Pcsk9    | - |
| E-DMM52 | Cdkn2a <sup>+/+</sup> _C57 | SIN.LV.SF.GFP | LIVER | 4 | 109511560 | + | NM_007983    | Faf1     | + |
| E-DMM55 | Cdkn2a <sup>+/+</sup> _C57 | SIN.LV.SF.GFP | LIVER | 4 | 109608798 | + | NM_007983    | Faf1     | + |
| E-DMM52 | Cdkn2a <sup>+/+</sup> _C57 | SIN.LV.SF.GFP | LIVER | 4 | 116213342 | - | NM_008389    | Ipp      | + |
| E-DMM63 | Cdkn2a <sup>+/+</sup> _C57 | SIN.LV.SF.GFP | LIVER | 4 | 116249594 | + | NM_029868    | Gpbp11l  | + |
| E-DMM50 | Cdkn2a <sup>+/+</sup> _C57 | SIN.LV.SF.GFP | LIVER | 4 | 116435889 | - | NM_146151    | Tesk2    | + |
| E-DMM58 | Cdkn2a <sup>+/+</sup> _C57 | SIN.LV.SF.GFP | LIVER | 4 | 116448315 | + | NM_146151    | Tesk2    | + |
| E-DMM52 | Cdkn2a <sup>+/+</sup> _C57 | SIN.LV.SF.GFP | LIVER | 4 | 119256281 | - | NM_172699    | Foxj3    | + |
| E-DMM50 | Cdkn2a <sup>+/+</sup> _C57 | SIN.LV.SF.GFP | LIVER | 4 | 122581673 | + | NM_007598    | Cap1     | - |
| E-DMM58 | Cdkn2a <sup>+/+</sup> _C57 | SIN.LV.SF.GFP | LIVER | 4 | 123257317 | + | NM_009600    | Macf1    | - |
| E-DMM58 | Cdkn2a <sup>+/+</sup> _C57 | SIN.LV.SF.GFP | LIVER | 4 | 123604214 | + | NM_017475    | Rragc    | + |
| E-DMM48 | Cdkn2a <sup>+/+</sup> _C57 | SIN.LV.SF.GFP | LIVER | 4 | 129416801 | - | NM_011317    | Khdrbs1  | - |
| E-DMM65 | Cdkn2a <sup>+/+</sup> _C57 | SIN.LV.SF.GFP | LIVER | 4 | 131503111 | - | NM_001128606 | Epb4.1   | - |
| E-DMM65 | Cdkn2a <sup>+/+</sup> _C57 | SIN.LV.SF.GFP | LIVER | 4 | 134048073 | - | NM_027995    | Paqr7    | + |
| E-DMM52 | Cdkn2a <sup>+/+</sup> _C57 | SIN.LV.SF.GFP | LIVER | 4 | 137553048 | - | NM_172703    | Eif4g3   | + |
| E-DMM55 | Cdkn2a <sup>+/+</sup> _C57 | SIN.LV.SF.GFP | LIVER | 4 | 139522615 | + | NM_173427    | Klhdc7a  | - |
| E-DMM63 | Cdkn2a <sup>+/+</sup> _C57 | SIN.LV.SF.GFP | LIVER | 4 | 144686627 | - | NM_001128198 | Vps13d   | - |

|         |                            |               |       |   |           |   |              |               |   |
|---------|----------------------------|---------------|-------|---|-----------|---|--------------|---------------|---|
| E-DMM58 | Cdkn2a <sup>+/+</sup> _C57 | SIN.LV.SF.GFP | LIVER | 4 | 144709638 | - | NM_001128198 | Vps13d        | - |
| E-DMM55 | Cdkn2a <sup>+/+</sup> _C57 | SIN.LV.SF.GFP | LIVER | 4 | 144742475 | + | NM_001128198 | Vps13d        | - |
| E-DMM57 | Cdkn2a <sup>+/+</sup> _C57 | SIN.LV.SF.GFP | LIVER | 4 | 144753942 | - | NM_001128198 | Vps13d        | - |
| E-DMM52 | Cdkn2a <sup>+/+</sup> _C57 | SIN.LV.SF.GFP | LIVER | 4 | 147892868 | - | NM_020009    | Mtor          | + |
| E-DMM52 | Cdkn2a <sup>+/+</sup> _C57 | SIN.LV.SF.GFP | LIVER | 4 | 154539651 | - | NM_011385    | Ski           | - |
| E-DMM65 | Cdkn2a <sup>+/+</sup> _C57 | SIN.LV.SF.GFP | LIVER | 4 | 154898795 | - | NM_001160016 | Gnb1          | + |
| E-DMM55 | Cdkn2a <sup>+/+</sup> _C57 | SIN.LV.SF.GFP | LIVER | 4 | 155348988 | - | NM_026125    | Fam132a       | + |
| E-DMM48 | Cdkn2a <sup>+/+</sup> _C57 | SIN.LV.SF.GFP | LIVER | 5 | 3390204   | - | NM_009873    | Cdk6          | + |
| E-DMM65 | Cdkn2a <sup>+/+</sup> _C57 | SIN.LV.SF.GFP | LIVER | 5 | 4936729   | + | NM_011074    | Pftk1         | - |
| E-DMM59 | Cdkn2a <sup>+/+</sup> _C57 | SIN.LV.SF.GFP | LIVER | 5 | 8406755   | - | NM_013726    | Dbf4          | - |
| E-DMM55 | Cdkn2a <sup>+/+</sup> _C57 | SIN.LV.SF.GFP | LIVER | 5 | 8868874   | + | NM_011075    | Abcb1b        | + |
| E-DMM63 | Cdkn2a <sup>+/+</sup> _C57 | SIN.LV.SF.GFP | LIVER | 5 | 9064902   | - | NM_001081029 | 4930420K17Rik | + |
| E-DMM65 | Cdkn2a <sup>+/+</sup> _C57 | SIN.LV.SF.GFP | LIVER | 5 | 9158574   | - | NM_001110327 | Dmtf1         | - |
| E-DMM59 | Cdkn2a <sup>+/+</sup> _C57 | SIN.LV.SF.GFP | LIVER | 5 | 12449022  | - | NM_028882    | Sema3d        | + |
| E-DMM63 | Cdkn2a <sup>+/+</sup> _C57 | SIN.LV.SF.GFP | LIVER | 5 | 12511937  | - | NM_028882    | Sema3d        | + |
| E-DMM52 | Cdkn2a <sup>+/+</sup> _C57 | SIN.LV.SF.GFP | LIVER | 5 | 12747989  | + | NM_028882    | Sema3d        | + |
| E-DMM57 | Cdkn2a <sup>+/+</sup> _C57 | SIN.LV.SF.GFP | LIVER | 5 | 12947875  | + | NM_028882    | Sema3d        | + |
| E-DMM57 | Cdkn2a <sup>+/+</sup> _C57 | SIN.LV.SF.GFP | LIVER | 5 | 13266913  | - | NM_009152    | Sema3a        | + |
| E-DMM48 | Cdkn2a <sup>+/+</sup> _C57 | SIN.LV.SF.GFP | LIVER | 5 | 13960337  | - | NM_011348    | Sema3e        | + |
| E-DMM48 | Cdkn2a <sup>+/+</sup> _C57 | SIN.LV.SF.GFP | LIVER | 5 | 13962184  | - | NM_011348    | Sema3e        | + |
| E-DMM63 | Cdkn2a <sup>+/+</sup> _C57 | SIN.LV.SF.GFP | LIVER | 5 | 16655896  | + | NM_027609    | Speer4f       | + |
| E-DMM50 | Cdkn2a <sup>+/+</sup> _C57 | SIN.LV.SF.GFP | LIVER | 5 | 17450367  | - | NM_001081143 | Gnat3         | + |
| E-DMM59 | Cdkn2a <sup>+/+</sup> _C57 | SIN.LV.SF.GFP | LIVER | 5 | 17835790  | + | NM_010305    | Gnai1         | - |
| E-DMM52 | Cdkn2a <sup>+/+</sup> _C57 | SIN.LV.SF.GFP | LIVER | 5 | 20435701  | - | NM_001080977 | Rsbn11        | - |
| E-DMM52 | Cdkn2a <sup>+/+</sup> _C57 | SIN.LV.SF.GFP | LIVER | 5 | 20442738  | - | NM_001080977 | Rsbn11        | - |
| E-DMM50 | Cdkn2a <sup>+/+</sup> _C57 | SIN.LV.SF.GFP | LIVER | 5 | 20532007  | - | NM_011203    | Ptpn12        | - |
| E-DMM50 | Cdkn2a <sup>+/+</sup> _C57 | SIN.LV.SF.GFP | LIVER | 5 | 20541779  | + | NM_011203    | Ptpn12        | - |
| E-DMM63 | Cdkn2a <sup>+/+</sup> _C57 | SIN.LV.SF.GFP | LIVER | 5 | 20825376  | + | NM_175437    | Pion          | + |
| E-DMM57 | Cdkn2a <sup>+/+</sup> _C57 | SIN.LV.SF.GFP | LIVER | 5 | 21622308  | + | NM_011261    | Reln          | - |
| E-DMM63 | Cdkn2a <sup>+/+</sup> _C57 | SIN.LV.SF.GFP | LIVER | 5 | 22933343  | - | NM_009274    | Srpk2         | - |
| E-DMM49 | Cdkn2a <sup>+/+</sup> _C57 | SIN.LV.SF.GFP | LIVER | 5 | 22955823  | + | NM_009274    | Srpk2         | - |

|         |                            |               |       |   |          |   |              |          |   |
|---------|----------------------------|---------------|-------|---|----------|---|--------------|----------|---|
| E-DMM50 | Cdkn2a <sup>+/+</sup> _C57 | SIN.LV.SF.GFP | LIVER | 5 | 22955869 | - | NM_009274    | Srpk2    | - |
| E-DMM48 | Cdkn2a <sup>+/+</sup> _C57 | SIN.LV.SF.GFP | LIVER | 5 | 24919974 | + | NM_001081383 | Mll3     | - |
| E-DMM52 | Cdkn2a <sup>+/+</sup> _C57 | SIN.LV.SF.GFP | LIVER | 5 | 28678301 | - | NM_028234    | Prr8     | + |
| E-DMM48 | Cdkn2a <sup>+/+</sup> _C57 | SIN.LV.SF.GFP | LIVER | 5 | 28679476 | + | NM_028234    | Prr8     | + |
| E-DMM57 | Cdkn2a <sup>+/+</sup> _C57 | SIN.LV.SF.GFP | LIVER | 5 | 30491193 | - | NM_145558    | Hadhb    | + |
| E-DMM58 | Cdkn2a <sup>+/+</sup> _C57 | SIN.LV.SF.GFP | LIVER | 5 | 32195875 | + | NM_144541    | Bre      | + |
| E-DMM57 | Cdkn2a <sup>+/+</sup> _C57 | SIN.LV.SF.GFP | LIVER | 5 | 32713014 | + | NM_001081407 | Plb1     | + |
| E-DMM50 | Cdkn2a <sup>+/+</sup> _C57 | SIN.LV.SF.GFP | LIVER | 5 | 32989311 | - | NM_009535    | Yes1     | + |
| E-DMM65 | Cdkn2a <sup>+/+</sup> _C57 | SIN.LV.SF.GFP | LIVER | 5 | 33230756 | + | NM_177786    | Depdc5   | + |
| E-DMM65 | Cdkn2a <sup>+/+</sup> _C57 | SIN.LV.SF.GFP | LIVER | 5 | 37797017 | - | NM_145920    | Evc2     | + |
| E-DMM57 | Cdkn2a <sup>+/+</sup> _C57 | SIN.LV.SF.GFP | LIVER | 5 | 38456740 | + | NM_026959    | Stx18    | + |
| E-DMM59 | Cdkn2a <sup>+/+</sup> _C57 | SIN.LV.SF.GFP | LIVER | 5 | 42019997 | + | NM_027295    | Rab28    | - |
| E-DMM55 | Cdkn2a <sup>+/+</sup> _C57 | SIN.LV.SF.GFP | LIVER | 5 | 42060079 | + | NM_027295    | Rab28    | - |
| E-DMM52 | Cdkn2a <sup>+/+</sup> _C57 | SIN.LV.SF.GFP | LIVER | 5 | 43645107 | - | NM_175937    | Cpeb2    | + |
| E-DMM57 | Cdkn2a <sup>+/+</sup> _C57 | SIN.LV.SF.GFP | LIVER | 5 | 44127253 | - | NM_172274    | Cc2d2a   | + |
| E-DMM48 | Cdkn2a <sup>+/+</sup> _C57 | SIN.LV.SF.GFP | LIVER | 5 | 45872119 | + | NM_024434    | Lap3     | + |
| E-DMM52 | Cdkn2a <sup>+/+</sup> _C57 | SIN.LV.SF.GFP | LIVER | 5 | 46189039 | + | NM_172153    | Lcor1    | - |
| E-DMM52 | Cdkn2a <sup>+/+</sup> _C57 | SIN.LV.SF.GFP | LIVER | 5 | 47350396 | - | NM_178804    | Slit2    | + |
| E-DMM49 | Cdkn2a <sup>+/+</sup> _C57 | SIN.LV.SF.GFP | LIVER | 5 | 47884210 | - | NM_178804    | Slit2    | + |
| E-DMM57 | Cdkn2a <sup>+/+</sup> _C57 | SIN.LV.SF.GFP | LIVER | 5 | 48022583 | - | NM_178804    | Slit2    | + |
| E-DMM52 | Cdkn2a <sup>+/+</sup> _C57 | SIN.LV.SF.GFP | LIVER | 5 | 49685502 | + | NM_030265    | Kcnip4   | - |
| E-DMM55 | Cdkn2a <sup>+/+</sup> _C57 | SIN.LV.SF.GFP | LIVER | 5 | 50351533 | + | NM_030265    | Kcnip4   | - |
| E-DMM50 | Cdkn2a <sup>+/+</sup> _C57 | SIN.LV.SF.GFP | LIVER | 5 | 50452383 | + | NM_030265    | Kcnip4   | - |
| E-DMM48 | Cdkn2a <sup>+/+</sup> _C57 | SIN.LV.SF.GFP | LIVER | 5 | 50527366 | - | NM_030265    | Kcnip4   | - |
| E-DMM50 | Cdkn2a <sup>+/+</sup> _C57 | SIN.LV.SF.GFP | LIVER | 5 | 51781893 | - | NM_008904    | Ppargc1a | - |
| E-DMM52 | Cdkn2a <sup>+/+</sup> _C57 | SIN.LV.SF.GFP | LIVER | 5 | 52541578 | + | NM_007839    | Dhx15    | - |
| E-DMM58 | Cdkn2a <sup>+/+</sup> _C57 | SIN.LV.SF.GFP | LIVER | 5 | 52554837 | + | NM_001042620 | Dhx15    | - |
| E-DMM58 | Cdkn2a <sup>+/+</sup> _C57 | SIN.LV.SF.GFP | LIVER | 5 | 52566804 | + | NM_001042620 | Dhx15    | - |
| E-DMM48 | Cdkn2a <sup>+/+</sup> _C57 | SIN.LV.SF.GFP | LIVER | 5 | 54406332 | + | NM_001081103 | Stim2    | + |
| E-DMM58 | Cdkn2a <sup>+/+</sup> _C57 | SIN.LV.SF.GFP | LIVER | 5 | 54455196 | - | NM_001081103 | Stim2    | + |
| E-DMM63 | Cdkn2a <sup>+/+</sup> _C57 | SIN.LV.SF.GFP | LIVER | 5 | 55008718 | + | NM_001081103 | Stim2    | + |



|         |                            |               |       |   |          |   |              |         |   |
|---------|----------------------------|---------------|-------|---|----------|---|--------------|---------|---|
| E-DMM59 | Cdkn2a <sup>+/+</sup> _C57 | SIN.LV.SF.GFP | LIVER | 5 | 58183712 | + | NM_001122758 | Pcdh7   | + |
| E-DMM52 | Cdkn2a <sup>+/+</sup> _C57 | SIN.LV.SF.GFP | LIVER | 5 | 58283464 | + | NM_001122758 | Pcdh7   | + |
| E-DMM65 | Cdkn2a <sup>+/+</sup> _C57 | SIN.LV.SF.GFP | LIVER | 5 | 59145384 | - | NM_001122758 | Pcdh7   | + |
| E-DMM47 | Cdkn2a <sup>+/+</sup> _C57 | SIN.LV.SF.GFP | LIVER | 5 | 61630089 | - | NM_019468    | G6pd2   | + |
| E-DMM50 | Cdkn2a <sup>+/+</sup> _C57 | SIN.LV.SF.GFP | LIVER | 5 | 63031809 | - | NM_178407    | Arap2   | - |
| E-DMM50 | Cdkn2a <sup>+/+</sup> _C57 | SIN.LV.SF.GFP | LIVER | 5 | 63059385 | + | NM_178407    | Arap2   | - |
| E-DMM57 | Cdkn2a <sup>+/+</sup> _C57 | SIN.LV.SF.GFP | LIVER | 5 | 63252634 | - | NM_178407    | Arap2   | - |
| E-DMM52 | Cdkn2a <sup>+/+</sup> _C57 | SIN.LV.SF.GFP | LIVER | 5 | 66800970 | + | NM_009686    | Apbb2   | - |
| E-DMM52 | Cdkn2a <sup>+/+</sup> _C57 | SIN.LV.SF.GFP | LIVER | 5 | 66900413 | + | NM_009686    | Apbb2   | - |
| E-DMM59 | Cdkn2a <sup>+/+</sup> _C57 | SIN.LV.SF.GFP | LIVER | 5 | 67659640 | - | NM_028975    | Tmem33  | + |
| E-DMM58 | Cdkn2a <sup>+/+</sup> _C57 | SIN.LV.SF.GFP | LIVER | 5 | 67716156 | + | NM_178651    | Slc30a9 | + |
| E-DMM58 | Cdkn2a <sup>+/+</sup> _C57 | SIN.LV.SF.GFP | LIVER | 5 | 72566488 | - | NM_178599    | Comm8   | - |
| E-DMM52 | Cdkn2a <sup>+/+</sup> _C57 | SIN.LV.SF.GFP | LIVER | 5 | 72674003 | - | NM_153389    | Atp10d  | + |
| E-DMM57 | Cdkn2a <sup>+/+</sup> _C57 | SIN.LV.SF.GFP | LIVER | 5 | 73567988 | - | NM_028194    | Fryl    | - |
| E-DMM57 | Cdkn2a <sup>+/+</sup> _C57 | SIN.LV.SF.GFP | LIVER | 5 | 73695774 | - | NM_001159889 | Ociad1  | + |
| E-DMM52 | Cdkn2a <sup>+/+</sup> _C57 | SIN.LV.SF.GFP | LIVER | 5 | 73912238 | - | NM_178896    | Dcun1d4 | + |
| E-DMM55 | Cdkn2a <sup>+/+</sup> _C57 | SIN.LV.SF.GFP | LIVER | 5 | 73924371 | - | NM_178896    | Dcun1d4 | + |
| E-DMM57 | Cdkn2a <sup>+/+</sup> _C57 | SIN.LV.SF.GFP | LIVER | 5 | 74968384 | + | NM_001159573 | Fip111  | + |
| E-DMM65 | Cdkn2a <sup>+/+</sup> _C57 | SIN.LV.SF.GFP | LIVER | 5 | 75412290 | - | NM_028850    | Chic2   | - |
| E-DMM52 | Cdkn2a <sup>+/+</sup> _C57 | SIN.LV.SF.GFP | LIVER | 5 | 76982790 | + | NM_027270    | Exoc1   | + |
| E-DMM65 | Cdkn2a <sup>+/+</sup> _C57 | SIN.LV.SF.GFP | LIVER | 5 | 81034409 | + | NM_198702    | Lphn3   | + |
| E-DMM50 | Cdkn2a <sup>+/+</sup> _C57 | SIN.LV.SF.GFP | LIVER | 5 | 81850453 | - | NM_198702    | Lphn3   | + |
| E-DMM52 | Cdkn2a <sup>+/+</sup> _C57 | SIN.LV.SF.GFP | LIVER | 5 | 81863581 | - | NM_198702    | Lphn3   | + |
| E-DMM57 | Cdkn2a <sup>+/+</sup> _C57 | SIN.LV.SF.GFP | LIVER | 5 | 81941452 | - | NM_198702    | Lphn3   | + |
| E-DMM50 | Cdkn2a <sup>+/+</sup> _C57 | SIN.LV.SF.GFP | LIVER | 5 | 86488331 | + | NM_007683    | Cenpc1  | - |
| E-DMM49 | Cdkn2a <sup>+/+</sup> _C57 | SIN.LV.SF.GFP | LIVER | 5 | 86563301 | - | NM_172712    | Uba6    | - |
| E-DMM63 | Cdkn2a <sup>+/+</sup> _C57 | SIN.LV.SF.GFP | LIVER | 5 | 86604367 | + | NM_172712    | Uba6    | - |
| E-DMM50 | Cdkn2a <sup>+/+</sup> _C57 | SIN.LV.SF.GFP | LIVER | 5 | 87348283 | - | NM_152811    | Ugt2b1  | - |
| E-DMM47 | Cdkn2a <sup>+/+</sup> _C57 | SIN.LV.SF.GFP | LIVER | 5 | 87679023 | + | NM_053215    | Ugt2b37 | - |
| E-DMM50 | Cdkn2a <sup>+/+</sup> _C57 | SIN.LV.SF.GFP | LIVER | 5 | 88039268 | + | NM_023135    | Sult1e1 | - |
| E-DMM48 | Cdkn2a <sup>+/+</sup> _C57 | SIN.LV.SF.GFP | LIVER | 5 | 88357287 | - | NM_007786    | Csn3    | + |

|         |                            |               |       |   |           |   |              |               |   |
|---------|----------------------------|---------------|-------|---|-----------|---|--------------|---------------|---|
| E-DMM55 | Cdkn2a <sup>+/+</sup> _C57 | SIN.LV.SF.GFP | LIVER | 5 | 89017542  | + | NM_027530    | Rufy3         | + |
| E-DMM59 | Cdkn2a <sup>+/+</sup> _C57 | SIN.LV.SF.GFP | LIVER | 5 | 89180588  | - | NM_026735    | Mobk11a       | + |
| E-DMM63 | Cdkn2a <sup>+/+</sup> _C57 | SIN.LV.SF.GFP | LIVER | 5 | 89397868  | + | NM_001136260 | Slc4a4        | + |
| E-DMM58 | Cdkn2a <sup>+/+</sup> _C57 | SIN.LV.SF.GFP | LIVER | 5 | 92605258  | - | NM_019490    | Uso1          | + |
| E-DMM49 | Cdkn2a <sup>+/+</sup> _C57 | SIN.LV.SF.GFP | LIVER | 5 | 93305934  | + | NM_001077595 | Shroom3       | + |
| E-DMM49 | Cdkn2a <sup>+/+</sup> _C57 | SIN.LV.SF.GFP | LIVER | 5 | 93682101  | + | NM_007635    | Ccng2         | + |
| E-DMM49 | Cdkn2a <sup>+/+</sup> _C57 | SIN.LV.SF.GFP | LIVER | 5 | 93704282  | - | NM_007635    | Ccng2         | + |
| E-DMM58 | Cdkn2a <sup>+/+</sup> _C57 | SIN.LV.SF.GFP | LIVER | 5 | 96527818  | + | NM_144910    | Cnot6l        | - |
| E-DMM50 | Cdkn2a <sup>+/+</sup> _C57 | SIN.LV.SF.GFP | LIVER | 5 | 96565254  | + | NM_178854    | Cnot6l        | - |
| E-DMM58 | Cdkn2a <sup>+/+</sup> _C57 | SIN.LV.SF.GFP | LIVER | 5 | 96635319  | + | NM_001039084 | Mrpl1         | + |
| E-DMM48 | Cdkn2a <sup>+/+</sup> _C57 | SIN.LV.SF.GFP | LIVER | 5 | 98316675  | + | NM_133738    | Antxr2        | - |
| E-DMM50 | Cdkn2a <sup>+/+</sup> _C57 | SIN.LV.SF.GFP | LIVER | 5 | 101313139 | + | NM_172715    | Agpat9        | + |
| E-DMM55 | Cdkn2a <sup>+/+</sup> _C57 | SIN.LV.SF.GFP | LIVER | 5 | 104398857 | - | NM_198030    | Hsd17b13      | - |
| E-DMM48 | Cdkn2a <sup>+/+</sup> _C57 | SIN.LV.SF.GFP | LIVER | 5 | 104452705 | + | NM_053262    | Hsd17b11      | - |
| E-DMM52 | Cdkn2a <sup>+/+</sup> _C57 | SIN.LV.SF.GFP | LIVER | 5 | 104941091 | + | NR_024083    | BC005561      | + |
| E-DMM55 | Cdkn2a <sup>+/+</sup> _C57 | SIN.LV.SF.GFP | LIVER | 5 | 105956173 | - | NM_133897    | Lrrc8c        | + |
| E-DMM52 | Cdkn2a <sup>+/+</sup> _C57 | SIN.LV.SF.GFP | LIVER | 5 | 106311356 | + | NM_018759    | Zfp326        | + |
| E-DMM50 | Cdkn2a <sup>+/+</sup> _C57 | SIN.LV.SF.GFP | LIVER | 5 | 108519281 | - | NM_013827    | Mtf2          | + |
| E-DMM49 | Cdkn2a <sup>+/+</sup> _C57 | SIN.LV.SF.GFP | LIVER | 5 | 110135956 | - | NM_016715    | Crlf2         | - |
| E-DMM57 | Cdkn2a <sup>+/+</sup> _C57 | SIN.LV.SF.GFP | LIVER | 5 | 110482237 | + | NM_207279    | Plexd1        | + |
| E-DMM63 | Cdkn2a <sup>+/+</sup> _C57 | SIN.LV.SF.GFP | LIVER | 5 | 110540952 | - | NM_145147    | Gtpbp6        | - |
| E-DMM58 | Cdkn2a <sup>+/+</sup> _C57 | SIN.LV.SF.GFP | LIVER | 5 | 110554061 | - | NM_172717    | Chfr          | + |
| E-DMM57 | Cdkn2a <sup>+/+</sup> _C57 | SIN.LV.SF.GFP | LIVER | 5 | 111495984 | - | NM_016681    | Chek2         | + |
| E-DMM52 | Cdkn2a <sup>+/+</sup> _C57 | SIN.LV.SF.GFP | LIVER | 5 | 118999241 | - | NM_172424    | Med13l        | + |
| E-DMM57 | Cdkn2a <sup>+/+</sup> _C57 | SIN.LV.SF.GFP | LIVER | 5 | 119167231 | + | NM_172424    | Med13l        | + |
| E-DMM57 | Cdkn2a <sup>+/+</sup> _C57 | SIN.LV.SF.GFP | LIVER | 5 | 120646442 | + | NM_028762    | Rbm19         | + |
| E-DMM48 | Cdkn2a <sup>+/+</sup> _C57 | SIN.LV.SF.GFP | LIVER | 5 | 121865889 | - | NM_172722    | C330023M02Rik | + |
| E-DMM55 | Cdkn2a <sup>+/+</sup> _C57 | SIN.LV.SF.GFP | LIVER | 5 | 121884549 | + | NM_172722    | C330023M02Rik | + |
| E-DMM58 | Cdkn2a <sup>+/+</sup> _C57 | SIN.LV.SF.GFP | LIVER | 5 | 122171777 | + | NM_009125    | Atxn2         | + |
| E-DMM57 | Cdkn2a <sup>+/+</sup> _C57 | SIN.LV.SF.GFP | LIVER | 5 | 122301278 | + | NM_175474    | Fam109a       | + |
| E-DMM50 | Cdkn2a <sup>+/+</sup> _C57 | SIN.LV.SF.GFP | LIVER | 5 | 137795215 | - | NM_001159571 | Ephb4         | + |

|         |                            |               |       |   |           |   |              |          |   |
|---------|----------------------------|---------------|-------|---|-----------|---|--------------|----------|---|
| E-DMM58 | Cdkn2a <sup>+/+</sup> _C57 | SIN.LV.SF.GFP | LIVER | 5 | 137798308 | + | NM_001159571 | Ephb4    | + |
| E-DMM63 | Cdkn2a <sup>+/+</sup> _C57 | SIN.LV.SF.GFP | LIVER | 5 | 137946353 | + | NM_028753    | Pop7     | - |
| E-DMM48 | Cdkn2a <sup>+/+</sup> _C57 | SIN.LV.SF.GFP | LIVER | 5 | 140694437 | - | NM_010752    | Mad111   | - |
| E-DMM48 | Cdkn2a <sup>+/+</sup> _C57 | SIN.LV.SF.GFP | LIVER | 5 | 141879860 | - | NM_177879    | Sdk1     | + |
| E-DMM58 | Cdkn2a <sup>+/+</sup> _C57 | SIN.LV.SF.GFP | LIVER | 5 | 145578824 | - | NM_001081362 | Trrap    | + |
| E-DMM49 | Cdkn2a <sup>+/+</sup> _C57 | SIN.LV.SF.GFP | LIVER | 5 | 147576181 | - | NM_011669    | Usp12    | - |
| E-DMM57 | Cdkn2a <sup>+/+</sup> _C57 | SIN.LV.SF.GFP | LIVER | 5 | 151167288 | + | NR_024513    | Gm5      | - |
| E-DMM58 | Cdkn2a <sup>+/+</sup> _C57 | SIN.LV.SF.GFP | LIVER | 5 | 152024103 | - | NM_146258    | Stard13  | - |
| E-DMM58 | Cdkn2a <sup>+/+</sup> _C57 | SIN.LV.SF.GFP | LIVER | 5 | 152177155 | - | NM_146258    | Stard13  | - |
| E-DMM63 | Cdkn2a <sup>+/+</sup> _C57 | SIN.LV.SF.GFP | LIVER | 6 | 3487676   | + | NM_024260    | Ccdc132  | + |
| E-DMM65 | Cdkn2a <sup>+/+</sup> _C57 | SIN.LV.SF.GFP | LIVER | 6 | 3540463   | - | NM_024260    | Ccdc132  | + |
| E-DMM57 | Cdkn2a <sup>+/+</sup> _C57 | SIN.LV.SF.GFP | LIVER | 6 | 3683538   | - | NM_001042725 | Calcr    | - |
| E-DMM63 | Cdkn2a <sup>+/+</sup> _C57 | SIN.LV.SF.GFP | LIVER | 6 | 4691922   | - | NM_001130188 | Sgce     | - |
| E-DMM52 | Cdkn2a <sup>+/+</sup> _C57 | SIN.LV.SF.GFP | LIVER | 6 | 5008245   | - | NM_181595    | Ppp1r9a  | + |
| E-DMM50 | Cdkn2a <sup>+/+</sup> _C57 | SIN.LV.SF.GFP | LIVER | 6 | 5134619   | + | NM_011134    | Pon1     | - |
| E-DMM63 | Cdkn2a <sup>+/+</sup> _C57 | SIN.LV.SF.GFP | LIVER | 6 | 6209135   | + | NM_015829    | Slc25a13 | - |
| E-DMM58 | Cdkn2a <sup>+/+</sup> _C57 | SIN.LV.SF.GFP | LIVER | 6 | 6406486   | + | NM_009169    | Shfm1    | - |
| E-DMM65 | Cdkn2a <sup>+/+</sup> _C57 | SIN.LV.SF.GFP | LIVER | 6 | 6560276   | + | NM_009169    | Shfm1    | - |
| E-DMM63 | Cdkn2a <sup>+/+</sup> _C57 | SIN.LV.SF.GFP | LIVER | 6 | 11901268  | + | NM_029404    | Phf14    | + |
| E-DMM52 | Cdkn2a <sup>+/+</sup> _C57 | SIN.LV.SF.GFP | LIVER | 6 | 11960747  | + | NM_029404    | Phf14    | + |
| E-DMM58 | Cdkn2a <sup>+/+</sup> _C57 | SIN.LV.SF.GFP | LIVER | 6 | 12013094  | + | NR_003631    | Gm6578   | - |
| E-DMM52 | Cdkn2a <sup>+/+</sup> _C57 | SIN.LV.SF.GFP | LIVER | 6 | 13560583  | + | NM_028990    | Tmem168  | - |
| E-DMM50 | Cdkn2a <sup>+/+</sup> _C57 | SIN.LV.SF.GFP | LIVER | 6 | 15013497  | + | NM_053242    | Foxp2    | + |
| E-DMM55 | Cdkn2a <sup>+/+</sup> _C57 | SIN.LV.SF.GFP | LIVER | 6 | 15163228  | + | NM_212435    | Foxp2    | + |
| E-DMM50 | Cdkn2a <sup>+/+</sup> _C57 | SIN.LV.SF.GFP | LIVER | 6 | 15720207  | + | NM_175088    | Mdfic    | + |
| E-DMM59 | Cdkn2a <sup>+/+</sup> _C57 | SIN.LV.SF.GFP | LIVER | 6 | 16079199  | + | NM_175088    | Mdfic    | + |
| E-DMM65 | Cdkn2a <sup>+/+</sup> _C57 | SIN.LV.SF.GFP | LIVER | 6 | 16763589  | - | NM_031198    | Tcfec    | - |
| E-DMM52 | Cdkn2a <sup>+/+</sup> _C57 | SIN.LV.SF.GFP | LIVER | 6 | 17017835  | + | NM_207176    | Tes      | + |
| E-DMM57 | Cdkn2a <sup>+/+</sup> _C57 | SIN.LV.SF.GFP | LIVER | 6 | 17732410  | + | NM_001083315 | St7      | + |
| E-DMM58 | Cdkn2a <sup>+/+</sup> _C57 | SIN.LV.SF.GFP | LIVER | 6 | 17737623  | + | NM_001083315 | St7      | + |
| E-DMM57 | Cdkn2a <sup>+/+</sup> _C57 | SIN.LV.SF.GFP | LIVER | 6 | 17812218  | + | NM_001083315 | St7      | + |

|          |                            |               |       |   |          |   |              |               |   |
|----------|----------------------------|---------------|-------|---|----------|---|--------------|---------------|---|
| E-DMM59  | Cdkn2a <sup>+/+</sup> _C57 | SIN.LV.SF.GFP | LIVER | 6 | 19763966 | + | NM_029202    | Ankrd7        | + |
| E-DMM55  | Cdkn2a <sup>+/+</sup> _C57 | SIN.LV.SF.GFP | LIVER | 6 | 19923822 | - | NM_029202    | Ankrd7        | + |
| E-DMM59  | Cdkn2a <sup>+/+</sup> _C57 | SIN.LV.SF.GFP | LIVER | 6 | 20515951 | + | NM_019697    | Kend2         | + |
| E-DMM48  | Cdkn2a <sup>+/+</sup> _C57 | SIN.LV.SF.GFP | LIVER | 6 | 24419709 | + | NM_172535    | Iqub          | - |
| E-DMM149 | Cdkn2a <sup>+/+</sup> _C57 | SIN.LV.SF.GFP | LIVER | 6 | 24860270 | - | NM_028957    | Hyal5         | + |
| E-DMM52  | Cdkn2a <sup>+/+</sup> _C57 | SIN.LV.SF.GFP | LIVER | 6 | 25037142 | - | NM_177013    | 6332401O19Rik | - |
| E-DMM58  | Cdkn2a <sup>+/+</sup> _C57 | SIN.LV.SF.GFP | LIVER | 6 | 26172303 | - | NM_133931    | Pot1a         | - |
| E-DMM65  | Cdkn2a <sup>+/+</sup> _C57 | SIN.LV.SF.GFP | LIVER | 6 | 26389790 | - | NM_133931    | Pot1a         | - |
| E-DMM57  | Cdkn2a <sup>+/+</sup> _C57 | SIN.LV.SF.GFP | LIVER | 6 | 26405852 | - | NM_133931    | Pot1a         | - |
| E-DMM59  | Cdkn2a <sup>+/+</sup> _C57 | SIN.LV.SF.GFP | LIVER | 6 | 26420280 | - | NM_133931    | Pot1a         | - |
| E-DMM58  | Cdkn2a <sup>+/+</sup> _C57 | SIN.LV.SF.GFP | LIVER | 6 | 26491410 | + | NM_133931    | Pot1a         | - |
| E-DMM52  | Cdkn2a <sup>+/+</sup> _C57 | SIN.LV.SF.GFP | LIVER | 6 | 27516033 | + | NM_008174    | Grm8          | - |
| E-DMM52  | Cdkn2a <sup>+/+</sup> _C57 | SIN.LV.SF.GFP | LIVER | 6 | 27655621 | - | NM_008174    | Grm8          | - |
| E-DMM50  | Cdkn2a <sup>+/+</sup> _C57 | SIN.LV.SF.GFP | LIVER | 6 | 30374998 | + | NM_029742    | Klhdc10       | + |
| E-DMM52  | Cdkn2a <sup>+/+</sup> _C57 | SIN.LV.SF.GFP | LIVER | 6 | 30786253 | - | NM_017478    | Copg2         | - |
| E-DMM58  | Cdkn2a <sup>+/+</sup> _C57 | SIN.LV.SF.GFP | LIVER | 6 | 31426501 | - | NM_013791    | Mkln1         | + |
| E-DMM57  | Cdkn2a <sup>+/+</sup> _C57 | SIN.LV.SF.GFP | LIVER | 6 | 32826412 | + | NM_025336    | Chchd3        | - |
| E-DMM58  | Cdkn2a <sup>+/+</sup> _C57 | SIN.LV.SF.GFP | LIVER | 6 | 34122465 | + | NM_021435    | Slc35b4       | - |
| E-DMM59  | Cdkn2a <sup>+/+</sup> _C57 | SIN.LV.SF.GFP | LIVER | 6 | 34723824 | + | NM_145575    | Cald1         | + |
| E-DMM63  | Cdkn2a <sup>+/+</sup> _C57 | SIN.LV.SF.GFP | LIVER | 6 | 34796214 | + | NM_178630    | Agbl3         | + |
| E-DMM48  | Cdkn2a <sup>+/+</sup> _C57 | SIN.LV.SF.GFP | LIVER | 6 | 36110061 | + | NM_203491    | Chrm2         | + |
| E-DMM55  | Cdkn2a <sup>+/+</sup> _C57 | SIN.LV.SF.GFP | LIVER | 6 | 37918040 | - | NM_145076    | Trim24        | + |
| E-DMM65  | Cdkn2a <sup>+/+</sup> _C57 | SIN.LV.SF.GFP | LIVER | 6 | 38460880 | + | NM_177185    | Ubn2          | + |
| E-DMM49  | Cdkn2a <sup>+/+</sup> _C57 | SIN.LV.SF.GFP | LIVER | 6 | 38544288 | + | NM_138680    | Luc7l2        | + |
| E-DMM57  | Cdkn2a <sup>+/+</sup> _C57 | SIN.LV.SF.GFP | LIVER | 6 | 38555928 | + | NM_138680    | Luc7l2        | + |
| E-DMM57  | Cdkn2a <sup>+/+</sup> _C57 | SIN.LV.SF.GFP | LIVER | 6 | 41156614 | + | NM_011646    | Try4          | + |
| E-DMM57  | Cdkn2a <sup>+/+</sup> _C57 | SIN.LV.SF.GFP | LIVER | 6 | 41630037 | - | NM_001007572 | Trpv5         | - |
| E-DMM52  | Cdkn2a <sup>+/+</sup> _C57 | SIN.LV.SF.GFP | LIVER | 6 | 42285593 | - | NM_001113327 | Fam131b       | - |
| E-DMM50  | Cdkn2a <sup>+/+</sup> _C57 | SIN.LV.SF.GFP | LIVER | 6 | 43595892 | - | NM_013861    | Tpk1          | - |
| E-DMM63  | Cdkn2a <sup>+/+</sup> _C57 | SIN.LV.SF.GFP | LIVER | 6 | 43604432 | - | NM_013861    | Tpk1          | - |
| E-DMM50  | Cdkn2a <sup>+/+</sup> _C57 | SIN.LV.SF.GFP | LIVER | 6 | 43621570 | + | NM_013861    | Tpk1          | - |

|         |                            |               |       |   |          |   |              |               |   |
|---------|----------------------------|---------------|-------|---|----------|---|--------------|---------------|---|
| E-DMM63 | Cdkn2a <sup>+/+</sup> _C57 | SIN.LV.SF.GFP | LIVER | 6 | 45549838 | + | NM_001004357 | Cntnap2       | + |
| E-DMM55 | Cdkn2a <sup>+/+</sup> _C57 | SIN.LV.SF.GFP | LIVER | 6 | 47501839 | - | NM_001146689 | Ezh2          | - |
| E-DMM63 | Cdkn2a <sup>+/+</sup> _C57 | SIN.LV.SF.GFP | LIVER | 6 | 49332771 | - | NM_172727    | D330028D13Rik | + |
| E-DMM57 | Cdkn2a <sup>+/+</sup> _C57 | SIN.LV.SF.GFP | LIVER | 6 | 51842432 | + | NM_018773    | Skap2         | - |
| E-DMM63 | Cdkn2a <sup>+/+</sup> _C57 | SIN.LV.SF.GFP | LIVER | 6 | 54830605 | + | NM_199143    | Znrf2         | + |
| E-DMM55 | Cdkn2a <sup>+/+</sup> _C57 | SIN.LV.SF.GFP | LIVER | 6 | 56713007 | - | NM_030235    | Avl9          | + |
| E-DMM52 | Cdkn2a <sup>+/+</sup> _C57 | SIN.LV.SF.GFP | LIVER | 6 | 56838585 | + | NM_026004    | Nt5c3         | - |
| E-DMM50 | Cdkn2a <sup>+/+</sup> _C57 | SIN.LV.SF.GFP | LIVER | 6 | 57604771 | - | NM_025574    | Pigy          | - |
| E-DMM50 | Cdkn2a <sup>+/+</sup> _C57 | SIN.LV.SF.GFP | LIVER | 6 | 58613047 | + | NM_011920    | Abcg2         | + |
| E-DMM57 | Cdkn2a <sup>+/+</sup> _C57 | SIN.LV.SF.GFP | LIVER | 6 | 58914241 | - | NM_153574    | Fam13a        | - |
| E-DMM50 | Cdkn2a <sup>+/+</sup> _C57 | SIN.LV.SF.GFP | LIVER | 6 | 59073203 | + | NM_001081145 | Tigd2         | + |
| E-DMM57 | Cdkn2a <sup>+/+</sup> _C57 | SIN.LV.SF.GFP | LIVER | 6 | 59288640 | - | NM_183183    | Gprin3        | - |
| E-DMM52 | Cdkn2a <sup>+/+</sup> _C57 | SIN.LV.SF.GFP | LIVER | 6 | 59430698 | - | NM_183183    | Gprin3        | - |
| E-DMM59 | Cdkn2a <sup>+/+</sup> _C57 | SIN.LV.SF.GFP | LIVER | 6 | 61384960 | + | NM_009221    | Snca          | - |
| E-DMM57 | Cdkn2a <sup>+/+</sup> _C57 | SIN.LV.SF.GFP | LIVER | 6 | 61681249 | - | NM_009221    | Snca          | - |
| E-DMM63 | Cdkn2a <sup>+/+</sup> _C57 | SIN.LV.SF.GFP | LIVER | 6 | 64042413 | + | NM_008167    | Grid2         | + |
| E-DMM50 | Cdkn2a <sup>+/+</sup> _C57 | SIN.LV.SF.GFP | LIVER | 6 | 65878472 | - | NM_027547    | Prdm5         | + |
| E-DMM52 | Cdkn2a <sup>+/+</sup> _C57 | SIN.LV.SF.GFP | LIVER | 6 | 66946780 | - | NM_025278    | Gng12         | + |
| E-DMM58 | Cdkn2a <sup>+/+</sup> _C57 | SIN.LV.SF.GFP | LIVER | 6 | 67221486 | + | NM_001113564 | Serbp1        | + |
| E-DMM59 | Cdkn2a <sup>+/+</sup> _C57 | SIN.LV.SF.GFP | LIVER | 6 | 71193796 | - | NM_001160127 | Smyd1         | - |
| E-DMM49 | Cdkn2a <sup>+/+</sup> _C57 | SIN.LV.SF.GFP | LIVER | 6 | 72268931 | + | NM_138592    | Usp39         | - |
| E-DMM65 | Cdkn2a <sup>+/+</sup> _C57 | SIN.LV.SF.GFP | LIVER | 6 | 73643985 | - | NM_025737    | 4931417E11Rik | - |
| E-DMM48 | Cdkn2a <sup>+/+</sup> _C57 | SIN.LV.SF.GFP | LIVER | 6 | 79357953 | + | NR_027323    | Lrrtm4        | + |
| E-DMM55 | Cdkn2a <sup>+/+</sup> _C57 | SIN.LV.SF.GFP | LIVER | 6 | 80946968 | + | NM_177884    | AW146020      | + |
| E-DMM58 | Cdkn2a <sup>+/+</sup> _C57 | SIN.LV.SF.GFP | LIVER | 6 | 83501853 | - | NM_024239    | Stambp        | - |
| E-DMM50 | Cdkn2a <sup>+/+</sup> _C57 | SIN.LV.SF.GFP | LIVER | 6 | 86151532 | + | NM_031199    | Tgfa          | + |
| E-DMM63 | Cdkn2a <sup>+/+</sup> _C57 | SIN.LV.SF.GFP | LIVER | 6 | 86891298 | - | NM_001040106 | Aak1          | + |
| E-DMM63 | Cdkn2a <sup>+/+</sup> _C57 | SIN.LV.SF.GFP | LIVER | 6 | 87343529 | - | NM_026860    | 1190003M12Rik | - |
| E-DMM52 | Cdkn2a <sup>+/+</sup> _C57 | SIN.LV.SF.GFP | LIVER | 6 | 90350549 | + | NM_173002    | Zxdc          | + |
| E-DMM52 | Cdkn2a <sup>+/+</sup> _C57 | SIN.LV.SF.GFP | LIVER | 6 | 90540341 | + | NM_027406    | Aldh1l1       | + |
| E-DMM57 | Cdkn2a <sup>+/+</sup> _C57 | SIN.LV.SF.GFP | LIVER | 6 | 91415303 | + | NM_133928    | Chchd4        | - |

|         |                            |               |       |   |           |   |              |               |   |
|---------|----------------------------|---------------|-------|---|-----------|---|--------------|---------------|---|
| E-DMM57 | Cdkn2a <sup>+/+</sup> _C57 | SIN.LV.SF.GFP | LIVER | 6 | 91474078  | - | NM_026309    | Lsm3          | + |
| E-DMM59 | Cdkn2a <sup>+/+</sup> _C57 | SIN.LV.SF.GFP | LIVER | 6 | 92011338  | + | NM_172731    | Fgd5          | + |
| E-DMM57 | Cdkn2a <sup>+/+</sup> _C57 | SIN.LV.SF.GFP | LIVER | 6 | 92089750  | + | NM_011630    | Nr2c2         | + |
| E-DMM63 | Cdkn2a <sup>+/+</sup> _C57 | SIN.LV.SF.GFP | LIVER | 6 | 92844194  | - | NM_175314    | Adamts9       | - |
| E-DMM50 | Cdkn2a <sup>+/+</sup> _C57 | SIN.LV.SF.GFP | LIVER | 6 | 94149942  | + | NM_001029850 | Magi1         | - |
| E-DMM65 | Cdkn2a <sup>+/+</sup> _C57 | SIN.LV.SF.GFP | LIVER | 6 | 98949318  | + | NM_053202    | Foxp1         | - |
| E-DMM52 | Cdkn2a <sup>+/+</sup> _C57 | SIN.LV.SF.GFP | LIVER | 6 | 99962154  | - | NM_019743    | Rybp          | - |
| E-DMM63 | Cdkn2a <sup>+/+</sup> _C57 | SIN.LV.SF.GFP | LIVER | 6 | 100540704 | + | NM_181590    | Shq1          | - |
| E-DMM52 | Cdkn2a <sup>+/+</sup> _C57 | SIN.LV.SF.GFP | LIVER | 6 | 104616928 | + | NM_017383    | Cntn6         | + |
| E-DMM63 | Cdkn2a <sup>+/+</sup> _C57 | SIN.LV.SF.GFP | LIVER | 6 | 108020296 | - | NM_145937    | Sumf1         | - |
| E-DMM59 | Cdkn2a <sup>+/+</sup> _C57 | SIN.LV.SF.GFP | LIVER | 6 | 108073221 | + | NM_145937    | Sumf1         | - |
| E-DMM52 | Cdkn2a <sup>+/+</sup> _C57 | SIN.LV.SF.GFP | LIVER | 6 | 108413763 | + | NM_010585    | Itrp1         | + |
| E-DMM52 | Cdkn2a <sup>+/+</sup> _C57 | SIN.LV.SF.GFP | LIVER | 6 | 108592471 | - | NM_011498    | Bhlhe40       | + |
| E-DMM50 | Cdkn2a <sup>+/+</sup> _C57 | SIN.LV.SF.GFP | LIVER | 6 | 108592913 | - | NM_011498    | Bhlhe40       | + |
| E-DMM65 | Cdkn2a <sup>+/+</sup> _C57 | SIN.LV.SF.GFP | LIVER | 6 | 108792596 | - | NM_138677    | Edem1         | + |
| E-DMM59 | Cdkn2a <sup>+/+</sup> _C57 | SIN.LV.SF.GFP | LIVER | 6 | 112612990 | - | NM_021385    | Rad18         | - |
| E-DMM58 | Cdkn2a <sup>+/+</sup> _C57 | SIN.LV.SF.GFP | LIVER | 6 | 113019172 | + | NR_027010    | Gt(ROSA)26Sor | - |
| E-DMM59 | Cdkn2a <sup>+/+</sup> _C57 | SIN.LV.SF.GFP | LIVER | 6 | 113509444 | + | NM_001033244 | Fancd2        | + |
| E-DMM52 | Cdkn2a <sup>+/+</sup> _C57 | SIN.LV.SF.GFP | LIVER | 6 | 116061572 | - | NM_026585    | D6Wsu116e     | + |
| E-DMM52 | Cdkn2a <sup>+/+</sup> _C57 | SIN.LV.SF.GFP | LIVER | 6 | 116170255 | - | NM_026585    | D6Wsu116e     | + |
| E-DMM52 | Cdkn2a <sup>+/+</sup> _C57 | SIN.LV.SF.GFP | LIVER | 6 | 118816899 | + | NM_001159533 | Cacna1c       | - |
| E-DMM58 | Cdkn2a <sup>+/+</sup> _C57 | SIN.LV.SF.GFP | LIVER | 6 | 119969814 | - | NM_198703    | Wnk1          | - |
| E-DMM52 | Cdkn2a <sup>+/+</sup> _C57 | SIN.LV.SF.GFP | LIVER | 6 | 119985795 | + | NM_198703    | Wnk1          | - |
| E-DMM57 | Cdkn2a <sup>+/+</sup> _C57 | SIN.LV.SF.GFP | LIVER | 6 | 120302701 | - | NM_026028    | Ccdc77        | - |
| E-DMM55 | Cdkn2a <sup>+/+</sup> _C57 | SIN.LV.SF.GFP | LIVER | 6 | 120320964 | - | NM_145997    | Kdm5a         | + |
| E-DMM48 | Cdkn2a <sup>+/+</sup> _C57 | SIN.LV.SF.GFP | LIVER | 6 | 125275343 | + | NM_011324    | Scnn1a        | + |
| E-DMM52 | Cdkn2a <sup>+/+</sup> _C57 | SIN.LV.SF.GFP | LIVER | 6 | 128521253 | - | NM_001001179 | BC048546      | - |
| E-DMM58 | Cdkn2a <sup>+/+</sup> _C57 | SIN.LV.SF.GFP | LIVER | 6 | 131236819 | + | NM_025564    | Magohb        | - |
| E-DMM52 | Cdkn2a <sup>+/+</sup> _C57 | SIN.LV.SF.GFP | LIVER | 6 | 131329601 | - | NM_011733    | Csda          | - |
| E-DMM59 | Cdkn2a <sup>+/+</sup> _C57 | SIN.LV.SF.GFP | LIVER | 6 | 135898004 | - | NM_008171    | Grin2b        | - |
| E-DMM52 | Cdkn2a <sup>+/+</sup> _C57 | SIN.LV.SF.GFP | LIVER | 6 | 136882344 | + | NM_007486    | Arhgdib       | - |

|         |                            |               |       |   |           |   |              |               |   |
|---------|----------------------------|---------------|-------|---|-----------|---|--------------|---------------|---|
| E-DMM52 | Cdkn2a <sup>+/+</sup> _C57 | SIN.LV.SF.GFP | LIVER | 6 | 138405162 | + | NM_207222    | Lmo3          | - |
| E-DMM49 | Cdkn2a <sup>+/+</sup> _C57 | SIN.LV.SF.GFP | LIVER | 6 | 140602624 | + | NM_001005605 | Aebp2         | + |
| E-DMM50 | Cdkn2a <sup>+/+</sup> _C57 | SIN.LV.SF.GFP | LIVER | 6 | 140602628 | - | NM_001005605 | Aebp2         | + |
| E-DMM52 | Cdkn2a <sup>+/+</sup> _C57 | SIN.LV.SF.GFP | LIVER | 6 | 141534789 | - | NM_021471    | Slco1c1       | + |
| E-DMM63 | Cdkn2a <sup>+/+</sup> _C57 | SIN.LV.SF.GFP | LIVER | 6 | 141599516 | + | NM_178235    | Slco1b2       | + |
| E-DMM50 | Cdkn2a <sup>+/+</sup> _C57 | SIN.LV.SF.GFP | LIVER | 6 | 143026010 | + | NM_001109688 | 5730419I09Rik | - |
| E-DMM55 | Cdkn2a <sup>+/+</sup> _C57 | SIN.LV.SF.GFP | LIVER | 6 | 143136679 | - | NM_029250    | Etnk1         | + |
| E-DMM65 | Cdkn2a <sup>+/+</sup> _C57 | SIN.LV.SF.GFP | LIVER | 6 | 143154074 | - | NM_029250    | Etnk1         | + |
| E-DMM52 | Cdkn2a <sup>+/+</sup> _C57 | SIN.LV.SF.GFP | LIVER | 6 | 146975270 | + | NM_026221    | Ppfbp1        | + |
| E-DMM47 | Cdkn2a <sup>+/+</sup> _C57 | SIN.LV.SF.GFP | LIVER | 6 | 148132416 | + | NM_026168    | Ergic2        | - |
| E-DMM57 | Cdkn2a <sup>+/+</sup> _C57 | SIN.LV.SF.GFP | LIVER | 6 | 148739673 | + | NM_001081113 | Ipo8          | - |
| E-DMM58 | Cdkn2a <sup>+/+</sup> _C57 | SIN.LV.SF.GFP | LIVER | 6 | 148883171 | - | NM_019643    | Fam60a        | - |
| E-DMM52 | Cdkn2a <sup>+/+</sup> _C57 | SIN.LV.SF.GFP | LIVER | 6 | 149210546 | + | NM_026054    | 2810474O19Rik | + |
| E-DMM57 | Cdkn2a <sup>+/+</sup> _C57 | SIN.LV.SF.GFP | LIVER | 6 | 149385068 | - | NM_001112796 | Bicd1         | + |
| E-DMM50 | Cdkn2a <sup>+/+</sup> _C57 | SIN.LV.SF.GFP | LIVER | 7 | 3149867   | - | NM_001004153 | AU018091      | - |
| E-DMM58 | Cdkn2a <sup>+/+</sup> _C57 | SIN.LV.SF.GFP | LIVER | 7 | 6667496   | + | NM_008817    | Peg3          | - |
| E-DMM49 | Cdkn2a <sup>+/+</sup> _C57 | SIN.LV.SF.GFP | LIVER | 7 | 6849525   | + | NM_021323    | Usp29         | + |
| E-DMM55 | Cdkn2a <sup>+/+</sup> _C57 | SIN.LV.SF.GFP | LIVER | 7 | 6889432   | - | NM_021323    | Usp29         | + |
| E-DMM52 | Cdkn2a <sup>+/+</sup> _C57 | SIN.LV.SF.GFP | LIVER | 7 | 13063002  | - | NM_001039951 | Zfp606        | + |
| E-DMM58 | Cdkn2a <sup>+/+</sup> _C57 | SIN.LV.SF.GFP | LIVER | 7 | 13554238  | - | NM_178732    | Zfp324        | + |
| E-DMM52 | Cdkn2a <sup>+/+</sup> _C57 | SIN.LV.SF.GFP | LIVER | 7 | 13929077  | - | NM_001004762 | Pla2g4c       | + |
| E-DMM52 | Cdkn2a <sup>+/+</sup> _C57 | SIN.LV.SF.GFP | LIVER | 7 | 15072718  | + | NM_175250    | 2810007J24Rik | - |
| E-DMM57 | Cdkn2a <sup>+/+</sup> _C57 | SIN.LV.SF.GFP | LIVER | 7 | 20422687  | - | NM_033601    | Bcl3          | - |
| E-DMM50 | Cdkn2a <sup>+/+</sup> _C57 | SIN.LV.SF.GFP | LIVER | 7 | 25046973  | - | NM_018791    | Zfp108        | + |
| E-DMM63 | Cdkn2a <sup>+/+</sup> _C57 | SIN.LV.SF.GFP | LIVER | 7 | 27904472  | - | NM_007817    | Cyp2f2        | + |
| E-DMM59 | Cdkn2a <sup>+/+</sup> _C57 | SIN.LV.SF.GFP | LIVER | 7 | 28363675  | - | NM_001122767 | 2310022A10Rik | + |
| E-DMM52 | Cdkn2a <sup>+/+</sup> _C57 | SIN.LV.SF.GFP | LIVER | 7 | 28663384  | + | NM_001024726 | Zfp607        | + |
| E-DMM52 | Cdkn2a <sup>+/+</sup> _C57 | SIN.LV.SF.GFP | LIVER | 7 | 28703512  | - | NM_028538    | 1700049G17Rik | - |
| E-DMM63 | Cdkn2a <sup>+/+</sup> _C57 | SIN.LV.SF.GFP | LIVER | 7 | 30275781  | - | NM_001081028 | Sipa1l3       | - |
| E-DMM58 | Cdkn2a <sup>+/+</sup> _C57 | SIN.LV.SF.GFP | LIVER | 7 | 30681304  | - | NM_001037707 | Zfp27         | - |
| E-DMM64 | Cdkn2a <sup>+/+</sup> _C57 | SIN.LV.SF.GFP | LIVER | 7 | 30699988  | - | NM_001037707 | Zfp27         | - |

|         |                            |               |       |   |          |   |              |               |   |
|---------|----------------------------|---------------|-------|---|----------|---|--------------|---------------|---|
| E-DMM65 | Cdkn2a <sup>+/+</sup> _C57 | SIN.LV.SF.GFP | LIVER | 7 | 30953190 | + | NM_011980    | Zfp146        | - |
| E-DMM49 | Cdkn2a <sup>+/+</sup> _C57 | SIN.LV.SF.GFP | LIVER | 7 | 35064401 | - | NM_172741    | 4931406P16Rik | - |
| E-DMM57 | Cdkn2a <sup>+/+</sup> _C57 | SIN.LV.SF.GFP | LIVER | 7 | 35634071 | - | NM_175140    | Chst8         | - |
| E-DMM63 | Cdkn2a <sup>+/+</sup> _C57 | SIN.LV.SF.GFP | LIVER | 7 | 50548574 | - | NM_027264    | Zfp715        | - |
| E-DMM57 | Cdkn2a <sup>+/+</sup> _C57 | SIN.LV.SF.GFP | LIVER | 7 | 50780776 | - | NM_001111058 | Cd33          | - |
| E-DMM63 | Cdkn2a <sup>+/+</sup> _C57 | SIN.LV.SF.GFP | LIVER | 7 | 52530798 | + | NM_001033176 | 1700039E15Rik | + |
| E-DMM52 | Cdkn2a <sup>+/+</sup> _C57 | SIN.LV.SF.GFP | LIVER | 7 | 54291209 | - | NM_026436    | Tmem86a       | + |
| E-DMM55 | Cdkn2a <sup>+/+</sup> _C57 | SIN.LV.SF.GFP | LIVER | 7 | 59150184 | - | NM_008087    | Gas2          | + |
| E-DMM59 | Cdkn2a <sup>+/+</sup> _C57 | SIN.LV.SF.GFP | LIVER | 7 | 59763011 | + | NM_001160345 | Svip          | - |
| E-DMM50 | Cdkn2a <sup>+/+</sup> _C57 | SIN.LV.SF.GFP | LIVER | 7 | 63055198 | + | NM_146190    | Tubgcp5       | + |
| E-DMM63 | Cdkn2a <sup>+/+</sup> _C57 | SIN.LV.SF.GFP | LIVER | 7 | 63149401 | - | NM_011370    | Cyfip1        | + |
| E-DMM63 | Cdkn2a <sup>+/+</sup> _C57 | SIN.LV.SF.GFP | LIVER | 7 | 66100850 | + | NM_009728    | Atp10a        | + |
| E-DMM57 | Cdkn2a <sup>+/+</sup> _C57 | SIN.LV.SF.GFP | LIVER | 7 | 66540896 | + | NM_173010    | Ube3a         | + |
| E-DMM52 | Cdkn2a <sup>+/+</sup> _C57 | SIN.LV.SF.GFP | LIVER | 7 | 71049468 | + | NM_021366    | Klf13         | - |
| E-DMM63 | Cdkn2a <sup>+/+</sup> _C57 | SIN.LV.SF.GFP | LIVER | 7 | 73045650 | - | NM_021336    | Snrpa1        | + |
| E-DMM59 | Cdkn2a <sup>+/+</sup> _C57 | SIN.LV.SF.GFP | LIVER | 7 | 73790692 | + | NM_080443    | Asb7          | - |
| E-DMM57 | Cdkn2a <sup>+/+</sup> _C57 | SIN.LV.SF.GFP | LIVER | 7 | 77243399 | + | NM_009697    | Nr2f2         | - |
| E-DMM59 | Cdkn2a <sup>+/+</sup> _C57 | SIN.LV.SF.GFP | LIVER | 7 | 78480241 | - | NM_001024703 | Mctp2         | - |
| E-DMM55 | Cdkn2a <sup>+/+</sup> _C57 | SIN.LV.SF.GFP | LIVER | 7 | 79242920 | - | NM_001024703 | Mctp2         | - |
| E-DMM59 | Cdkn2a <sup>+/+</sup> _C57 | SIN.LV.SF.GFP | LIVER | 7 | 80001333 | - | NM_177740    | Rgma          | + |
| E-DMM50 | Cdkn2a <sup>+/+</sup> _C57 | SIN.LV.SF.GFP | LIVER | 7 | 82616770 | + | NM_029332    | Akap13        | + |
| E-DMM50 | Cdkn2a <sup>+/+</sup> _C57 | SIN.LV.SF.GFP | LIVER | 7 | 82627160 | + | NM_029332    | Akap13        | + |
| E-DMM65 | Cdkn2a <sup>+/+</sup> _C57 | SIN.LV.SF.GFP | LIVER | 7 | 82674360 | + | NM_029332    | Akap13        | + |
| E-DMM50 | Cdkn2a <sup>+/+</sup> _C57 | SIN.LV.SF.GFP | LIVER | 7 | 82845465 | + | NM_029332    | Akap13        | + |
| E-DMM58 | Cdkn2a <sup>+/+</sup> _C57 | SIN.LV.SF.GFP | LIVER | 7 | 83266690 | + | NM_001122780 | Klh25         | + |
| E-DMM63 | Cdkn2a <sup>+/+</sup> _C57 | SIN.LV.SF.GFP | LIVER | 7 | 88438285 | + | NM_008803    | Pde8a         | + |
| E-DMM57 | Cdkn2a <sup>+/+</sup> _C57 | SIN.LV.SF.GFP | LIVER | 7 | 89959469 | - | NM_001159672 | Eftud1        | + |
| E-DMM63 | Cdkn2a <sup>+/+</sup> _C57 | SIN.LV.SF.GFP | LIVER | 7 | 95110940 | - | NM_001081414 | Grm5          | + |
| E-DMM50 | Cdkn2a <sup>+/+</sup> _C57 | SIN.LV.SF.GFP | LIVER | 7 | 95420437 | - | NM_009982    | Ctsc          | + |
| E-DMM65 | Cdkn2a <sup>+/+</sup> _C57 | SIN.LV.SF.GFP | LIVER | 7 | 96301944 | + | NM_028343    | Tmem135       | - |
| E-DMM65 | Cdkn2a <sup>+/+</sup> _C57 | SIN.LV.SF.GFP | LIVER | 7 | 96342538 | + | NM_028343    | Tmem135       | - |



|         |                            |               |       |   |           |   |              |               |   |
|---------|----------------------------|---------------|-------|---|-----------|---|--------------|---------------|---|
| E-DMM50 | Cdkn2a <sup>+/+</sup> _C57 | SIN.LV.SF.GFP | LIVER | 7 | 96403700  | + | NM_028343    | Tmem135       | - |
| E-DMM59 | Cdkn2a <sup>+/+</sup> _C57 | SIN.LV.SF.GFP | LIVER | 7 | 96522486  | + | NM_008055    | Fzd4          | + |
| E-DMM57 | Cdkn2a <sup>+/+</sup> _C57 | SIN.LV.SF.GFP | LIVER | 7 | 96865645  | + | NM_181407    | Me3           | + |
| E-DMM50 | Cdkn2a <sup>+/+</sup> _C57 | SIN.LV.SF.GFP | LIVER | 7 | 97049169  | + | NM_026304    | l7Rn6         | - |
| E-DMM59 | Cdkn2a <sup>+/+</sup> _C57 | SIN.LV.SF.GFP | LIVER | 7 | 97328472  | + | NM_146194    | Picalm        | + |
| E-DMM48 | Cdkn2a <sup>+/+</sup> _C57 | SIN.LV.SF.GFP | LIVER | 7 | 97345673  | - | NM_146194    | Picalm        | + |
| E-DMM65 | Cdkn2a <sup>+/+</sup> _C57 | SIN.LV.SF.GFP | LIVER | 7 | 102982815 | - | NM_011858    | Odz4          | + |
| E-DMM57 | Cdkn2a <sup>+/+</sup> _C57 | SIN.LV.SF.GFP | LIVER | 7 | 104979035 | - | NM_011035    | Pak1          | + |
| E-DMM59 | Cdkn2a <sup>+/+</sup> _C57 | SIN.LV.SF.GFP | LIVER | 7 | 108300634 | + | NM_001146010 | Fchsd2        | + |
| E-DMM63 | Cdkn2a <sup>+/+</sup> _C57 | SIN.LV.SF.GFP | LIVER | 7 | 109102660 | - | NM_133947    | Numa1         | + |
| E-DMM55 | Cdkn2a <sup>+/+</sup> _C57 | SIN.LV.SF.GFP | LIVER | 7 | 109492078 | + | NM_009287    | Stim1         | + |
| E-DMM57 | Cdkn2a <sup>+/+</sup> _C57 | SIN.LV.SF.GFP | LIVER | 7 | 110888559 | - | NM_146821    | Olf629        | - |
| E-DMM50 | Cdkn2a <sup>+/+</sup> _C57 | SIN.LV.SF.GFP | LIVER | 7 | 111764613 | + | NM_147075    | Olf656        | + |
| E-DMM65 | Cdkn2a <sup>+/+</sup> _C57 | SIN.LV.SF.GFP | LIVER | 7 | 113653949 | - | NR_003967    | Gm4759        | - |
| E-DMM48 | Cdkn2a <sup>+/+</sup> _C57 | SIN.LV.SF.GFP | LIVER | 7 | 114642079 | - | NM_021889    | Syt9          | + |
| E-DMM48 | Cdkn2a <sup>+/+</sup> _C57 | SIN.LV.SF.GFP | LIVER | 7 | 114811195 | - | NM_008905    | Ppfbp2        | + |
| E-DMM59 | Cdkn2a <sup>+/+</sup> _C57 | SIN.LV.SF.GFP | LIVER | 7 | 115252553 | - | NM_146735    | Olf483        | + |
| E-DMM63 | Cdkn2a <sup>+/+</sup> _C57 | SIN.LV.SF.GFP | LIVER | 7 | 117736771 | - | NM_009627    | Adm           | + |
| E-DMM52 | Cdkn2a <sup>+/+</sup> _C57 | SIN.LV.SF.GFP | LIVER | 7 | 120498229 | - | NM_133700    | Btbd10        | - |
| E-DMM52 | Cdkn2a <sup>+/+</sup> _C57 | SIN.LV.SF.GFP | LIVER | 7 | 122701342 | + | NM_001025559 | Sox6          | - |
| E-DMM55 | Cdkn2a <sup>+/+</sup> _C57 | SIN.LV.SF.GFP | LIVER | 7 | 125939555 | - | NM_027815    | 9030624J02Rik | + |
| E-DMM58 | Cdkn2a <sup>+/+</sup> _C57 | SIN.LV.SF.GFP | LIVER | 7 | 126983524 | + | NM_028129    | 2610020H08Rik | + |
| E-DMM63 | Cdkn2a <sup>+/+</sup> _C57 | SIN.LV.SF.GFP | LIVER | 7 | 127013992 | + | NM_173408    | Dcun1d3       | - |
| E-DMM59 | Cdkn2a <sup>+/+</sup> _C57 | SIN.LV.SF.GFP | LIVER | 7 | 127303910 | - | NM_028085    | Anks4b        | + |
| E-DMM50 | Cdkn2a <sup>+/+</sup> _C57 | SIN.LV.SF.GFP | LIVER | 7 | 128821434 | - | NM_001033173 | Usp31         | - |
| E-DMM49 | Cdkn2a <sup>+/+</sup> _C57 | SIN.LV.SF.GFP | LIVER | 7 | 132754912 | + | NM_021887    | Il21r         | + |
| E-DMM57 | Cdkn2a <sup>+/+</sup> _C57 | SIN.LV.SF.GFP | LIVER | 7 | 133254989 | + | NM_028816    | Xpo6          | - |
| E-DMM58 | Cdkn2a <sup>+/+</sup> _C57 | SIN.LV.SF.GFP | LIVER | 7 | 133750115 | - | NM_145636    | Il27          | - |
| E-DMM55 | Cdkn2a <sup>+/+</sup> _C57 | SIN.LV.SF.GFP | LIVER | 7 | 134695442 | + | NM_026888    | Phkg2         | + |
| E-DMM63 | Cdkn2a <sup>+/+</sup> _C57 | SIN.LV.SF.GFP | LIVER | 7 | 140012627 | - | NM_028095    | Mettl10       | - |
| E-DMM55 | Cdkn2a <sup>+/+</sup> _C57 | SIN.LV.SF.GFP | LIVER | 7 | 140037118 | - | NM_028095    | Mettl10       | - |

|         |                            |               |       |   |           |   |              |          |   |
|---------|----------------------------|---------------|-------|---|-----------|---|--------------|----------|---|
| E-DMM58 | Cdkn2a <sup>+/+</sup> _C57 | SIN.LV.SF.GFP | LIVER | 7 | 146056943 | + | NM_026391    | Ppp2r2d  | + |
| E-DMM58 | Cdkn2a <sup>+/+</sup> _C57 | SIN.LV.SF.GFP | LIVER | 7 | 146090963 | - | NM_009760    | Bnip3    | - |
| E-DMM63 | Cdkn2a <sup>+/+</sup> _C57 | SIN.LV.SF.GFP | LIVER | 7 | 148784678 | + | NM_007459    | Ap2a2    | + |
| E-DMM59 | Cdkn2a <sup>+/+</sup> _C57 | SIN.LV.SF.GFP | LIVER | 7 | 150429165 | - | NR_001461    | Kcnq1ot1 | - |
| E-DMM63 | Cdkn2a <sup>+/+</sup> _C57 | SIN.LV.SF.GFP | LIVER | 7 | 151637923 | - | NM_007803    | Ctnn     | - |
| E-DMM58 | Cdkn2a <sup>+/+</sup> _C57 | SIN.LV.SF.GFP | LIVER | 8 | 3547177   | + | NM_001122818 | Pnpla6   | + |
| E-DMM55 | Cdkn2a <sup>+/+</sup> _C57 | SIN.LV.SF.GFP | LIVER | 8 | 4633646   | - | NM_145591    | BC003267 | + |
| E-DMM57 | Cdkn2a <sup>+/+</sup> _C57 | SIN.LV.SF.GFP | LIVER | 8 | 5025057   | + | NM_011388    | Slc10a2  | - |
| E-DMM52 | Cdkn2a <sup>+/+</sup> _C57 | SIN.LV.SF.GFP | LIVER | 8 | 5035915   | - | NM_011388    | Slc10a2  | - |
| E-DMM59 | Cdkn2a <sup>+/+</sup> _C57 | SIN.LV.SF.GFP | LIVER | 8 | 6406113   | - | NM_011388    | Slc10a2  | - |
| E-DMM63 | Cdkn2a <sup>+/+</sup> _C57 | SIN.LV.SF.GFP | LIVER | 8 | 6887015   | + | NM_010111    | Efnb2    | - |
| E-DMM50 | Cdkn2a <sup>+/+</sup> _C57 | SIN.LV.SF.GFP | LIVER | 8 | 7408321   | + | NM_010111    | Efnb2    | - |
| E-DMM65 | Cdkn2a <sup>+/+</sup> _C57 | SIN.LV.SF.GFP | LIVER | 8 | 7991314   | - | NM_010111    | Efnb2    | - |
| E-DMM63 | Cdkn2a <sup>+/+</sup> _C57 | SIN.LV.SF.GFP | LIVER | 8 | 8667007   | - | NM_176849    | Arglu1   | - |
| E-DMM65 | Cdkn2a <sup>+/+</sup> _C57 | SIN.LV.SF.GFP | LIVER | 8 | 9970736   | - | NM_176953    | Lig4     | - |
| E-DMM63 | Cdkn2a <sup>+/+</sup> _C57 | SIN.LV.SF.GFP | LIVER | 8 | 10601145  | + | NM_001081397 | Myo16    | + |
| E-DMM57 | Cdkn2a <sup>+/+</sup> _C57 | SIN.LV.SF.GFP | LIVER | 8 | 11627451  | + | NM_133971    | Ankrd10  | - |
| E-DMM58 | Cdkn2a <sup>+/+</sup> _C57 | SIN.LV.SF.GFP | LIVER | 8 | 11772100  | + | NM_001113518 | Arhgef7  | + |
| E-DMM49 | Cdkn2a <sup>+/+</sup> _C57 | SIN.LV.SF.GFP | LIVER | 8 | 13483368  | - | NM_019521    | Gas6     | - |
| E-DMM65 | Cdkn2a <sup>+/+</sup> _C57 | SIN.LV.SF.GFP | LIVER | 8 | 14935294  | - | NM_001037736 | Arhgef10 | + |
| E-DMM59 | Cdkn2a <sup>+/+</sup> _C57 | SIN.LV.SF.GFP | LIVER | 8 | 14965517  | + | NM_001037736 | Arhgef10 | + |
| E-DMM55 | Cdkn2a <sup>+/+</sup> _C57 | SIN.LV.SF.GFP | LIVER | 8 | 18001798  | + | NM_053171    | Csmd1    | - |
| E-DMM52 | Cdkn2a <sup>+/+</sup> _C57 | SIN.LV.SF.GFP | LIVER | 8 | 18864289  | + | NM_026792    | Agpat5   | + |
| E-DMM52 | Cdkn2a <sup>+/+</sup> _C57 | SIN.LV.SF.GFP | LIVER | 8 | 23547491  | + | NM_020560    | Mrps31   | + |
| E-DMM57 | Cdkn2a <sup>+/+</sup> _C57 | SIN.LV.SF.GFP | LIVER | 8 | 26727611  | - | NM_001001735 | Whsc111  | + |
| E-DMM59 | Cdkn2a <sup>+/+</sup> _C57 | SIN.LV.SF.GFP | LIVER | 8 | 27177974  | - | NM_207659    | Hook3    | - |
| E-DMM52 | Cdkn2a <sup>+/+</sup> _C57 | SIN.LV.SF.GFP | LIVER | 8 | 28204568  | + | NM_054044    | Gpr124   | + |
| E-DMM57 | Cdkn2a <sup>+/+</sup> _C57 | SIN.LV.SF.GFP | LIVER | 8 | 29580444  | + | NM_153135    | Unc5d    | - |
| E-DMM57 | Cdkn2a <sup>+/+</sup> _C57 | SIN.LV.SF.GFP | LIVER | 8 | 33090567  | + | NM_178591    | Nrg1     | - |
| E-DMM50 | Cdkn2a <sup>+/+</sup> _C57 | SIN.LV.SF.GFP | LIVER | 8 | 34477835  | + | NM_001122822 | Wrn      | - |
| E-DMM63 | Cdkn2a <sup>+/+</sup> _C57 | SIN.LV.SF.GFP | LIVER | 8 | 37171167  | - | NM_172911    | D8Erd82e | + |

|         |                            |               |       |   |          |   |              |               |   |
|---------|----------------------------|---------------|-------|---|----------|---|--------------|---------------|---|
| E-DMM63 | Cdkn2a <sup>+/+</sup> _C57 | SIN.LV.SF.GFP | LIVER | 8 | 37841085 | + | NM_178735    | A730069N07Rik | - |
| E-DMM58 | Cdkn2a <sup>+/+</sup> _C57 | SIN.LV.SF.GFP | LIVER | 8 | 38497145 | - | NM_145841    | Sgcz          | - |
| E-DMM50 | Cdkn2a <sup>+/+</sup> _C57 | SIN.LV.SF.GFP | LIVER | 8 | 39643338 | + | NM_145841    | Sgcz          | - |
| E-DMM52 | Cdkn2a <sup>+/+</sup> _C57 | SIN.LV.SF.GFP | LIVER | 8 | 39785011 | - | NM_145841    | Sgcz          | - |
| E-DMM58 | Cdkn2a <sup>+/+</sup> _C57 | SIN.LV.SF.GFP | LIVER | 8 | 40111050 | - | NM_030254    | Tusc3         | + |
| E-DMM59 | Cdkn2a <sup>+/+</sup> _C57 | SIN.LV.SF.GFP | LIVER | 8 | 40155731 | - | NM_030254    | Tusc3         | + |
| E-DMM48 | Cdkn2a <sup>+/+</sup> _C57 | SIN.LV.SF.GFP | LIVER | 8 | 40543652 | - | NM_001113326 | Msr1          | - |
| E-DMM52 | Cdkn2a <sup>+/+</sup> _C57 | SIN.LV.SF.GFP | LIVER | 8 | 40561323 | - | NM_001113326 | Msr1          | - |
| E-DMM52 | Cdkn2a <sup>+/+</sup> _C57 | SIN.LV.SF.GFP | LIVER | 8 | 40563054 | - | NM_001113326 | Msr1          | - |
| E-DMM50 | Cdkn2a <sup>+/+</sup> _C57 | SIN.LV.SF.GFP | LIVER | 8 | 40565515 | - | NM_001113326 | Msr1          | - |
| E-DMM65 | Cdkn2a <sup>+/+</sup> _C57 | SIN.LV.SF.GFP | LIVER | 8 | 41437517 | + | NM_030610    | Fgf20         | - |
| E-DMM59 | Cdkn2a <sup>+/+</sup> _C57 | SIN.LV.SF.GFP | LIVER | 8 | 41626417 | - | NM_033560    | Vps37a        | + |
| E-DMM52 | Cdkn2a <sup>+/+</sup> _C57 | SIN.LV.SF.GFP | LIVER | 8 | 41752590 | + | NM_010086    | Adam24        | + |
| E-DMM57 | Cdkn2a <sup>+/+</sup> _C57 | SIN.LV.SF.GFP | LIVER | 8 | 42167659 | + | NM_001005863 | Mtus1         | - |
| E-DMM50 | Cdkn2a <sup>+/+</sup> _C57 | SIN.LV.SF.GFP | LIVER | 8 | 42383044 | - | NM_023662    | Pcm1          | + |
| E-DMM48 | Cdkn2a <sup>+/+</sup> _C57 | SIN.LV.SF.GFP | LIVER | 8 | 46134168 | + | NM_001081286 | Fat1          | + |
| E-DMM58 | Cdkn2a <sup>+/+</sup> _C57 | SIN.LV.SF.GFP | LIVER | 8 | 46403568 | + | NM_133969    | Cyp4v3        | - |
| E-DMM58 | Cdkn2a <sup>+/+</sup> _C57 | SIN.LV.SF.GFP | LIVER | 8 | 47676497 | - | NM_001001184 | Ccdc111       | - |
| E-DMM58 | Cdkn2a <sup>+/+</sup> _C57 | SIN.LV.SF.GFP | LIVER | 8 | 47852561 | - | NM_008391    | Irf2          | + |
| E-DMM63 | Cdkn2a <sup>+/+</sup> _C57 | SIN.LV.SF.GFP | LIVER | 8 | 48697082 | - | NM_023503    | Ing2          | - |
| E-DMM65 | Cdkn2a <sup>+/+</sup> _C57 | SIN.LV.SF.GFP | LIVER | 8 | 49263956 | - | NM_001161515 | Dctd          | + |
| E-DMM52 | Cdkn2a <sup>+/+</sup> _C57 | SIN.LV.SF.GFP | LIVER | 8 | 49497433 | + | NM_001145937 | Odz3          | - |
| E-DMM50 | Cdkn2a <sup>+/+</sup> _C57 | SIN.LV.SF.GFP | LIVER | 8 | 49905201 | + | NM_001145937 | Odz3          | - |
| E-DMM52 | Cdkn2a <sup>+/+</sup> _C57 | SIN.LV.SF.GFP | LIVER | 8 | 53971231 | + | NM_001005847 | Aga           | + |
| E-DMM57 | Cdkn2a <sup>+/+</sup> _C57 | SIN.LV.SF.GFP | LIVER | 8 | 54517108 | - | NM_001005847 | Aga           | + |
| E-DMM52 | Cdkn2a <sup>+/+</sup> _C57 | SIN.LV.SF.GFP | LIVER | 8 | 54796273 | - | NM_146208    | Neil3         | - |
| E-DMM58 | Cdkn2a <sup>+/+</sup> _C57 | SIN.LV.SF.GFP | LIVER | 8 | 54952916 | + | NM_009506    | Vegfc         | + |
| E-DMM59 | Cdkn2a <sup>+/+</sup> _C57 | SIN.LV.SF.GFP | LIVER | 8 | 55260826 | + | NM_009506    | Vegfc         | + |
| E-DMM50 | Cdkn2a <sup>+/+</sup> _C57 | SIN.LV.SF.GFP | LIVER | 8 | 59036468 | + | NM_015791    | Fbxo8         | + |
| E-DMM58 | Cdkn2a <sup>+/+</sup> _C57 | SIN.LV.SF.GFP | LIVER | 8 | 59339157 | - | NM_015791    | Fbxo8         | + |
| E-DMM50 | Cdkn2a <sup>+/+</sup> _C57 | SIN.LV.SF.GFP | LIVER | 8 | 60096221 | + | NM_144731    | Galnt7        | - |

|         |                            |               |       |   |           |   |              |               |   |
|---------|----------------------------|---------------|-------|---|-----------|---|--------------|---------------|---|
| E-DMM58 | Cdkn2a <sup>+/+</sup> _C57 | SIN.LV.SF.GFP | LIVER | 8 | 60114413  | + | NM_144731    | Galnt7        | - |
| E-DMM59 | Cdkn2a <sup>+/+</sup> _C57 | SIN.LV.SF.GFP | LIVER | 8 | 62227253  | - | NM_011834    | Aadat         | + |
| E-DMM63 | Cdkn2a <sup>+/+</sup> _C57 | SIN.LV.SF.GFP | LIVER | 8 | 63397121  | - | NM_007711    | Clcn3         | - |
| E-DMM57 | Cdkn2a <sup>+/+</sup> _C57 | SIN.LV.SF.GFP | LIVER | 8 | 63419441  | + | NM_173876    | Clcn3         | - |
| E-DMM58 | Cdkn2a <sup>+/+</sup> _C57 | SIN.LV.SF.GFP | LIVER | 8 | 64118542  | - | NM_001081390 | Palld         | - |
| E-DMM65 | Cdkn2a <sup>+/+</sup> _C57 | SIN.LV.SF.GFP | LIVER | 8 | 64452211  | + | NM_001081215 | Ddx60         | + |
| E-DMM52 | Cdkn2a <sup>+/+</sup> _C57 | SIN.LV.SF.GFP | LIVER | 8 | 68915800  | - | NM_175188    | 1-Mar         | + |
| E-DMM48 | Cdkn2a <sup>+/+</sup> _C57 | SIN.LV.SF.GFP | LIVER | 8 | 68934694  | + | NM_175188    | 1-Mar         | + |
| E-DMM55 | Cdkn2a <sup>+/+</sup> _C57 | SIN.LV.SF.GFP | LIVER | 8 | 69389395  | + | NM_010934    | Npy1r         | + |
| E-DMM55 | Cdkn2a <sup>+/+</sup> _C57 | SIN.LV.SF.GFP | LIVER | 8 | 70278692  | + | NM_027626    | Psd3          | - |
| E-DMM63 | Cdkn2a <sup>+/+</sup> _C57 | SIN.LV.SF.GFP | LIVER | 8 | 70332237  | + | NM_027626    | Psd3          | - |
| E-DMM57 | Cdkn2a <sup>+/+</sup> _C57 | SIN.LV.SF.GFP | LIVER | 8 | 70619566  | + | NM_177698    | Psd3          | - |
| E-DMM52 | Cdkn2a <sup>+/+</sup> _C57 | SIN.LV.SF.GFP | LIVER | 8 | 71506430  | - | NM_153054    | Slc18a1       | - |
| E-DMM52 | Cdkn2a <sup>+/+</sup> _C57 | SIN.LV.SF.GFP | LIVER | 8 | 71918952  | - | NM_172491    | D130040H23Rik | + |
| E-DMM48 | Cdkn2a <sup>+/+</sup> _C57 | SIN.LV.SF.GFP | LIVER | 8 | 74411873  | - | NM_145624    | Zfp709        | + |
| E-DMM52 | Cdkn2a <sup>+/+</sup> _C57 | SIN.LV.SF.GFP | LIVER | 8 | 76676507  | + | NM_027837    | Isx           | + |
| E-DMM63 | Cdkn2a <sup>+/+</sup> _C57 | SIN.LV.SF.GFP | LIVER | 8 | 77728031  | - | NM_029182    | Rasd2         | + |
| E-DMM52 | Cdkn2a <sup>+/+</sup> _C57 | SIN.LV.SF.GFP | LIVER | 8 | 77905736  | + | NM_029182    | Rasd2         | + |
| E-DMM59 | Cdkn2a <sup>+/+</sup> _C57 | SIN.LV.SF.GFP | LIVER | 8 | 79988762  | + | NM_030113    | Arhgap10      | - |
| E-DMM48 | Cdkn2a <sup>+/+</sup> _C57 | SIN.LV.SF.GFP | LIVER | 8 | 82157666  | + | NM_001081164 | Otud4         | + |
| E-DMM52 | Cdkn2a <sup>+/+</sup> _C57 | SIN.LV.SF.GFP | LIVER | 8 | 82913501  | - | NM_010369    | Gypa          | + |
| E-DMM49 | Cdkn2a <sup>+/+</sup> _C57 | SIN.LV.SF.GFP | LIVER | 8 | 83243145  | + | NM_053124    | Smarca5       | - |
| E-DMM50 | Cdkn2a <sup>+/+</sup> _C57 | SIN.LV.SF.GFP | LIVER | 8 | 84470671  | - | NM_001024617 | Inpp4b        | + |
| E-DMM48 | Cdkn2a <sup>+/+</sup> _C57 | SIN.LV.SF.GFP | LIVER | 8 | 91736251  | + | NM_021390    | Sall1         | - |
| E-DMM48 | Cdkn2a <sup>+/+</sup> _C57 | SIN.LV.SF.GFP | LIVER | 8 | 93843527  | + | NM_011936    | Fto           | + |
| E-DMM58 | Cdkn2a <sup>+/+</sup> _C57 | SIN.LV.SF.GFP | LIVER | 8 | 98284447  | + | NM_153164    | Cnot1         | - |
| E-DMM58 | Cdkn2a <sup>+/+</sup> _C57 | SIN.LV.SF.GFP | LIVER | 8 | 100977367 | - | NM_001039154 | Cdh8          | - |
| E-DMM50 | Cdkn2a <sup>+/+</sup> _C57 | SIN.LV.SF.GFP | LIVER | 8 | 104912798 | - | NM_009866    | Cdh11         | - |
| E-DMM58 | Cdkn2a <sup>+/+</sup> _C57 | SIN.LV.SF.GFP | LIVER | 8 | 108938312 | - | NM_011764    | Zfp90         | + |
| E-DMM58 | Cdkn2a <sup>+/+</sup> _C57 | SIN.LV.SF.GFP | LIVER | 8 | 112003480 | - | NM_019938    | Pmfbp1        | + |
| E-DMM47 | Cdkn2a <sup>+/+</sup> _C57 | SIN.LV.SF.GFP | LIVER | 8 | 113362827 | - | NM_133953    | Sf3b3         | - |

|         |                            |               |       |   |           |   |              |               |   |
|---------|----------------------------|---------------|-------|---|-----------|---|--------------|---------------|---|
| E-DMM57 | Cdkn2a <sup>+/+</sup> _C57 | SIN.LV.SF.GFP | LIVER | 8 | 113725163 | + | NM_009149    | Glg1          | - |
| E-DMM59 | Cdkn2a <sup>+/+</sup> _C57 | SIN.LV.SF.GFP | LIVER | 8 | 113990058 | - | NM_176923    | Wdr59         | - |
| E-DMM52 | Cdkn2a <sup>+/+</sup> _C57 | SIN.LV.SF.GFP | LIVER | 8 | 116167257 | - | NM_001048145 | 4930481F22Rik | + |
| E-DMM58 | Cdkn2a <sup>+/+</sup> _C57 | SIN.LV.SF.GFP | LIVER | 8 | 126247314 | - | NM_133955    | Rhou          | + |
| E-DMM58 | Cdkn2a <sup>+/+</sup> _C57 | SIN.LV.SF.GFP | LIVER | 8 | 126273434 | - | NM_009003    | Rab4a         | + |
| E-DMM59 | Cdkn2a <sup>+/+</sup> _C57 | SIN.LV.SF.GFP | LIVER | 8 | 130937175 | + | NM_008737    | Nrp1          | + |
| E-DMM58 | Cdkn2a <sup>+/+</sup> _C57 | SIN.LV.SF.GFP | LIVER | 8 | 131257403 | - | NM_010578    | Itgb1         | + |
| E-DMM63 | Cdkn2a <sup>+/+</sup> _C57 | SIN.LV.SF.GFP | LIVER | 9 | 3002384   | - | NM_026303    | Alkbh8        | + |
| E-DMM48 | Cdkn2a <sup>+/+</sup> _C57 | SIN.LV.SF.GFP | LIVER | 9 | 3004805   | + | NM_026303    | Alkbh8        | + |
| E-DMM63 | Cdkn2a <sup>+/+</sup> _C57 | SIN.LV.SF.GFP | LIVER | 9 | 3027460   | + | NM_026303    | Alkbh8        | + |
| E-DMM57 | Cdkn2a <sup>+/+</sup> _C57 | SIN.LV.SF.GFP | LIVER | 9 | 3443792   | + | NM_027545    | Cwf19l2       | + |
| E-DMM52 | Cdkn2a <sup>+/+</sup> _C57 | SIN.LV.SF.GFP | LIVER | 9 | 3458847   | - | NM_027545    | Cwf19l2       | + |
| E-DMM57 | Cdkn2a <sup>+/+</sup> _C57 | SIN.LV.SF.GFP | LIVER | 9 | 5322188   | + | NM_007609    | Casp4         | + |
| E-DMM48 | Cdkn2a <sup>+/+</sup> _C57 | SIN.LV.SF.GFP | LIVER | 9 | 6427523   | + | NM_027924    | Pdgfd         | + |
| E-DMM55 | Cdkn2a <sup>+/+</sup> _C57 | SIN.LV.SF.GFP | LIVER | 9 | 6965019   | - | NM_029851    | Dync2h1       | - |
| E-DMM52 | Cdkn2a <sup>+/+</sup> _C57 | SIN.LV.SF.GFP | LIVER | 9 | 7001127   | + | NM_029851    | Dync2h1       | - |
| E-DMM64 | Cdkn2a <sup>+/+</sup> _C57 | SIN.LV.SF.GFP | LIVER | 9 | 7115811   | + | NM_029851    | Dync2h1       | - |
| E-DMM59 | Cdkn2a <sup>+/+</sup> _C57 | SIN.LV.SF.GFP | LIVER | 9 | 7133455   | - | NM_029851    | Dync2h1       | - |
| E-DMM57 | Cdkn2a <sup>+/+</sup> _C57 | SIN.LV.SF.GFP | LIVER | 9 | 7254340   | + | NM_008607    | Mmp13         | + |
| E-DMM63 | Cdkn2a <sup>+/+</sup> _C57 | SIN.LV.SF.GFP | LIVER | 9 | 7833662   | - | NM_007465    | Birc2         | - |
| E-DMM52 | Cdkn2a <sup>+/+</sup> _C57 | SIN.LV.SF.GFP | LIVER | 9 | 8706730   | + | NM_013838    | Trpc6         | + |
| E-DMM63 | Cdkn2a <sup>+/+</sup> _C57 | SIN.LV.SF.GFP | LIVER | 9 | 8997127   | - | NM_027823    | 9030420J04Rik | - |
| E-DMM52 | Cdkn2a <sup>+/+</sup> _C57 | SIN.LV.SF.GFP | LIVER | 9 | 9216435   | - | NM_027823    | 9030420J04Rik | - |
| E-DMM58 | Cdkn2a <sup>+/+</sup> _C57 | SIN.LV.SF.GFP | LIVER | 9 | 13641447  | - | NM_176836    | Fam76b        | + |
| E-DMM48 | Cdkn2a <sup>+/+</sup> _C57 | SIN.LV.SF.GFP | LIVER | 9 | 14359661  | - | NM_001081395 | Amotl1        | - |
| E-DMM57 | Cdkn2a <sup>+/+</sup> _C57 | SIN.LV.SF.GFP | LIVER | 9 | 14629170  | + | NM_018736    | Mre11a        | + |
| E-DMM58 | Cdkn2a <sup>+/+</sup> _C57 | SIN.LV.SF.GFP | LIVER | 9 | 15071615  | - | NM_144933    | Med17         | - |
| E-DMM58 | Cdkn2a <sup>+/+</sup> _C57 | SIN.LV.SF.GFP | LIVER | 9 | 15103691  | - | NM_133732    | 4931406C07Rik | - |
| E-DMM52 | Cdkn2a <sup>+/+</sup> _C57 | SIN.LV.SF.GFP | LIVER | 9 | 15272854  | + | NM_133214    | BC017612      | + |
| E-DMM52 | Cdkn2a <sup>+/+</sup> _C57 | SIN.LV.SF.GFP | LIVER | 9 | 17027115  | - | NM_001080814 | Fat3          | - |
| E-DMM59 | Cdkn2a <sup>+/+</sup> _C57 | SIN.LV.SF.GFP | LIVER | 9 | 17033746  | - | NM_001080814 | Fat3          | - |

|         |                            |               |       |   |          |   |              |               |   |
|---------|----------------------------|---------------|-------|---|----------|---|--------------|---------------|---|
| E-DMM52 | Cdkn2a <sup>+/+</sup> _C57 | SIN.LV.SF.GFP | LIVER | 9 | 18259755 | + | NM_144934    | Mbd3l2        | + |
| E-DMM52 | Cdkn2a <sup>+/+</sup> _C57 | SIN.LV.SF.GFP | LIVER | 9 | 21282565 | + | NM_001039520 | Dnm2          | + |
| E-DMM58 | Cdkn2a <sup>+/+</sup> _C57 | SIN.LV.SF.GFP | LIVER | 9 | 22313688 | + | NM_178415    | Bbs9          | + |
| E-DMM63 | Cdkn2a <sup>+/+</sup> _C57 | SIN.LV.SF.GFP | LIVER | 9 | 23235448 | - | NM_028472    | Bmper         | + |
| E-DMM52 | Cdkn2a <sup>+/+</sup> _C57 | SIN.LV.SF.GFP | LIVER | 9 | 24951384 | - | NM_020586    | Herpud2       | - |
| E-DMM57 | Cdkn2a <sup>+/+</sup> _C57 | SIN.LV.SF.GFP | LIVER | 9 | 24951408 | + | NM_020586    | Herpud2       | - |
| E-DMM63 | Cdkn2a <sup>+/+</sup> _C57 | SIN.LV.SF.GFP | LIVER | 9 | 25026950 | + | NM_009859    | 7-Sep         | + |
| E-DMM58 | Cdkn2a <sup>+/+</sup> _C57 | SIN.LV.SF.GFP | LIVER | 9 | 25081558 | - | NM_009859    | 7-Sep         | + |
| E-DMM65 | Cdkn2a <sup>+/+</sup> _C57 | SIN.LV.SF.GFP | LIVER | 9 | 25105195 | - | NM_009859    | 7-Sep         | + |
| E-DMM63 | Cdkn2a <sup>+/+</sup> _C57 | SIN.LV.SF.GFP | LIVER | 9 | 26920759 | - | NM_023277    | Jam3          | - |
| E-DMM49 | Cdkn2a <sup>+/+</sup> _C57 | SIN.LV.SF.GFP | LIVER | 9 | 26953126 | + | NM_023277    | Jam3          | - |
| E-DMM52 | Cdkn2a <sup>+/+</sup> _C57 | SIN.LV.SF.GFP | LIVER | 9 | 27608674 | + | NM_177906    | Opcml         | + |
| E-DMM52 | Cdkn2a <sup>+/+</sup> _C57 | SIN.LV.SF.GFP | LIVER | 9 | 28201016 | + | NM_177906    | Opcml         | + |
| E-DMM57 | Cdkn2a <sup>+/+</sup> _C57 | SIN.LV.SF.GFP | LIVER | 9 | 29280100 | - | NM_172290    | Ntm           | - |
| E-DMM57 | Cdkn2a <sup>+/+</sup> _C57 | SIN.LV.SF.GFP | LIVER | 9 | 31957478 | - | NM_177379    | Grit          | + |
| E-DMM52 | Cdkn2a <sup>+/+</sup> _C57 | SIN.LV.SF.GFP | LIVER | 9 | 32339698 | - | NM_008026    | Fli1          | - |
| E-DMM57 | Cdkn2a <sup>+/+</sup> _C57 | SIN.LV.SF.GFP | LIVER | 9 | 37320351 | - | NM_146222    | BC024479      | + |
| E-DMM55 | Cdkn2a <sup>+/+</sup> _C57 | SIN.LV.SF.GFP | LIVER | 9 | 38537107 | - | NM_001145957 | Vwa5a         | + |
| E-DMM59 | Cdkn2a <sup>+/+</sup> _C57 | SIN.LV.SF.GFP | LIVER | 9 | 39234622 | + | NM_146503    | Olf952        | - |
| E-DMM57 | Cdkn2a <sup>+/+</sup> _C57 | SIN.LV.SF.GFP | LIVER | 9 | 42964101 | - | NM_011139    | Pou2f3        | - |
| E-DMM48 | Cdkn2a <sup>+/+</sup> _C57 | SIN.LV.SF.GFP | LIVER | 9 | 43559038 | - | NM_021424    | Pvr1l         | + |
| E-DMM58 | Cdkn2a <sup>+/+</sup> _C57 | SIN.LV.SF.GFP | LIVER | 9 | 44067246 | - | NM_178420    | Nlr1          | - |
| E-DMM52 | Cdkn2a <sup>+/+</sup> _C57 | SIN.LV.SF.GFP | LIVER | 9 | 45933457 | + | NM_027498    | BC033915      | + |
| E-DMM50 | Cdkn2a <sup>+/+</sup> _C57 | SIN.LV.SF.GFP | LIVER | 9 | 49790618 | - | NM_001081445 | Ncam1         | - |
| E-DMM65 | Cdkn2a <sup>+/+</sup> _C57 | SIN.LV.SF.GFP | LIVER | 9 | 50736329 | + | NM_178710    | Sik2          | - |
| E-DMM59 | Cdkn2a <sup>+/+</sup> _C57 | SIN.LV.SF.GFP | LIVER | 9 | 50793633 | - | NM_178710    | Sik2          | - |
| E-DMM50 | Cdkn2a <sup>+/+</sup> _C57 | SIN.LV.SF.GFP | LIVER | 9 | 51869190 | + | NM_001104617 | Rdx           | + |
| E-DMM50 | Cdkn2a <sup>+/+</sup> _C57 | SIN.LV.SF.GFP | LIVER | 9 | 51943539 | + | NM_001104616 | Rdx           | + |
| E-DMM57 | Cdkn2a <sup>+/+</sup> _C57 | SIN.LV.SF.GFP | LIVER | 9 | 53031377 | - | NM_029936    | Ddx10         | - |
| E-DMM57 | Cdkn2a <sup>+/+</sup> _C57 | SIN.LV.SF.GFP | LIVER | 9 | 53047734 | + | NM_029936    | Ddx10         | - |
| E-DMM49 | Cdkn2a <sup>+/+</sup> _C57 | SIN.LV.SF.GFP | LIVER | 9 | 56160304 | - | NM_172924    | C230081A13Rik | - |

|         |                            |               |       |   |          |   |              |               |   |
|---------|----------------------------|---------------|-------|---|----------|---|--------------|---------------|---|
| E-DMM58 | Cdkn2a <sup>+/+</sup> _C57 | SIN.LV.SF.GFP | LIVER | 9 | 59321212 | + | NM_019927    | Arlh1         | - |
| E-DMM63 | Cdkn2a <sup>+/+</sup> _C57 | SIN.LV.SF.GFP | LIVER | 9 | 62804966 | - | NM_019663    | Pias1         | - |
| E-DMM52 | Cdkn2a <sup>+/+</sup> _C57 | SIN.LV.SF.GFP | LIVER | 9 | 64663747 | - | NM_017382    | Rab11a        | - |
| E-DMM58 | Cdkn2a <sup>+/+</sup> _C57 | SIN.LV.SF.GFP | LIVER | 9 | 65699462 | - | NM_019797    | Trip4         | - |
| E-DMM50 | Cdkn2a <sup>+/+</sup> _C57 | SIN.LV.SF.GFP | LIVER | 9 | 66326411 | + | NM_175206    | Fbxl22        | - |
| E-DMM52 | Cdkn2a <sup>+/+</sup> _C57 | SIN.LV.SF.GFP | LIVER | 9 | 66645659 | + | NM_177583    | Aph1b         | - |
| E-DMM55 | Cdkn2a <sup>+/+</sup> _C57 | SIN.LV.SF.GFP | LIVER | 9 | 70414026 | - | NM_025690    | Sltn          | + |
| E-DMM59 | Cdkn2a <sup>+/+</sup> _C57 | SIN.LV.SF.GFP | LIVER | 9 | 71709064 | + | NM_011544    | Tcf12         | - |
| E-DMM50 | Cdkn2a <sup>+/+</sup> _C57 | SIN.LV.SF.GFP | LIVER | 9 | 71738416 | + | NM_011544    | Tcf12         | - |
| E-DMM58 | Cdkn2a <sup>+/+</sup> _C57 | SIN.LV.SF.GFP | LIVER | 9 | 71920663 | - | NM_011544    | Tcf12         | - |
| E-DMM50 | Cdkn2a <sup>+/+</sup> _C57 | SIN.LV.SF.GFP | LIVER | 9 | 74387403 | + | NM_001033500 | Wdr72         | + |
| E-DMM50 | Cdkn2a <sup>+/+</sup> _C57 | SIN.LV.SF.GFP | LIVER | 9 | 77793469 | - | NM_134255    | Elovl5        | + |
| E-DMM50 | Cdkn2a <sup>+/+</sup> _C57 | SIN.LV.SF.GFP | LIVER | 9 | 79817018 | + | NM_001081243 | Filip1        | - |
| E-DMM50 | Cdkn2a <sup>+/+</sup> _C57 | SIN.LV.SF.GFP | LIVER | 9 | 79917403 | + | NM_146003    | Senp6         | + |
| E-DMM57 | Cdkn2a <sup>+/+</sup> _C57 | SIN.LV.SF.GFP | LIVER | 9 | 82875790 | - | NM_001081216 | Phip          | - |
| E-DMM63 | Cdkn2a <sup>+/+</sup> _C57 | SIN.LV.SF.GFP | LIVER | 9 | 83738406 | + | NM_001110265 | Ttk           | + |
| E-DMM52 | Cdkn2a <sup>+/+</sup> _C57 | SIN.LV.SF.GFP | LIVER | 9 | 84245366 | - | NM_199195    | Bckdhh        | + |
| E-DMM65 | Cdkn2a <sup>+/+</sup> _C57 | SIN.LV.SF.GFP | LIVER | 9 | 85066919 | - | NM_001160378 | Fam46a        | - |
| E-DMM58 | Cdkn2a <sup>+/+</sup> _C57 | SIN.LV.SF.GFP | LIVER | 9 | 85346948 | + | NM_001160379 | Fam46a        | - |
| E-DMM58 | Cdkn2a <sup>+/+</sup> _C57 | SIN.LV.SF.GFP | LIVER | 9 | 86367471 | + | NM_177208    | Dopey1        | + |
| E-DMM57 | Cdkn2a <sup>+/+</sup> _C57 | SIN.LV.SF.GFP | LIVER | 9 | 89173171 | + | NM_026829    | Mthfs         | + |
| E-DMM65 | Cdkn2a <sup>+/+</sup> _C57 | SIN.LV.SF.GFP | LIVER | 9 | 89260308 | + | NM_026829    | Mthfs         | + |
| E-DMM59 | Cdkn2a <sup>+/+</sup> _C57 | SIN.LV.SF.GFP | LIVER | 9 | 89381535 | + | NM_153509    | AF529169      | - |
| E-DMM57 | Cdkn2a <sup>+/+</sup> _C57 | SIN.LV.SF.GFP | LIVER | 9 | 89987766 | + | NM_001039147 | Morf4l1       | - |
| E-DMM59 | Cdkn2a <sup>+/+</sup> _C57 | SIN.LV.SF.GFP | LIVER | 9 | 90002170 | - | NM_001039147 | Morf4l1       | - |
| E-DMM63 | Cdkn2a <sup>+/+</sup> _C57 | SIN.LV.SF.GFP | LIVER | 9 | 92831890 | - | NM_001142916 | Plod2         | + |
| E-DMM50 | Cdkn2a <sup>+/+</sup> _C57 | SIN.LV.SF.GFP | LIVER | 9 | 94032009 | + | NM_001033145 | 1190002N15Rik | - |
| E-DMM57 | Cdkn2a <sup>+/+</sup> _C57 | SIN.LV.SF.GFP | LIVER | 9 | 94839328 | + | NM_177909    | Slc9a9        | + |
| E-DMM50 | Cdkn2a <sup>+/+</sup> _C57 | SIN.LV.SF.GFP | LIVER | 9 | 95080112 | - | NM_177909    | Slc9a9        | + |
| E-DMM55 | Cdkn2a <sup>+/+</sup> _C57 | SIN.LV.SF.GFP | LIVER | 9 | 95807585 | + | NM_019864    | Atr           | + |
| E-DMM52 | Cdkn2a <sup>+/+</sup> _C57 | SIN.LV.SF.GFP | LIVER | 9 | 95878090 | - | NM_011916    | Xrn1          | + |

|         |                            |               |       |    |           |   |              |               |   |
|---------|----------------------------|---------------|-------|----|-----------|---|--------------|---------------|---|
| E-DMM57 | Cdkn2a <sup>+/+</sup> _C57 | SIN.LV.SF.GFP | LIVER | 9  | 96305275  | - | NM_007502    | Atp1b3        | - |
| E-DMM52 | Cdkn2a <sup>+/+</sup> _C57 | SIN.LV.SF.GFP | LIVER | 9  | 100683501 | + | NM_009282    | Stag1         | + |
| E-DMM59 | Cdkn2a <sup>+/+</sup> _C57 | SIN.LV.SF.GFP | LIVER | 9  | 108545712 | + | NM_011790    | Arh2          | - |
| E-DMM48 | Cdkn2a <sup>+/+</sup> _C57 | SIN.LV.SF.GFP | LIVER | 9  | 110133714 | - | NM_009211    | Smarcc1       | + |
| E-DMM50 | Cdkn2a <sup>+/+</sup> _C57 | SIN.LV.SF.GFP | LIVER | 9  | 111025766 | - | NM_027742    | Lrrfip2       | + |
| E-DMM55 | Cdkn2a <sup>+/+</sup> _C57 | SIN.LV.SF.GFP | LIVER | 9  | 111102940 | + | NM_027742    | Lrrfip2       | + |
| E-DMM59 | Cdkn2a <sup>+/+</sup> _C57 | SIN.LV.SF.GFP | LIVER | 9  | 111179199 | + | NM_175266    | Epm2aip1      | + |
| E-DMM55 | Cdkn2a <sup>+/+</sup> _C57 | SIN.LV.SF.GFP | LIVER | 9  | 113031559 | - | NM_011052    | Pdcd6ip       | - |
| E-DMM47 | Cdkn2a <sup>+/+</sup> _C57 | SIN.LV.SF.GFP | LIVER | 9  | 113459766 | - | NM_011052    | Pdcd6ip       | - |
| E-DMM58 | Cdkn2a <sup>+/+</sup> _C57 | SIN.LV.SF.GFP | LIVER | 9  | 114346901 | + | NM_009752    | Glb1          | + |
| E-DMM50 | Cdkn2a <sup>+/+</sup> _C57 | SIN.LV.SF.GFP | LIVER | 9  | 114646628 | + | NM_026036    | Cmtm6         | + |
| E-DMM63 | Cdkn2a <sup>+/+</sup> _C57 | SIN.LV.SF.GFP | LIVER | 9  | 115186270 | + | NM_024222    | Stt3b         | - |
| E-DMM58 | Cdkn2a <sup>+/+</sup> _C57 | SIN.LV.SF.GFP | LIVER | 9  | 119974200 | - | NM_009987    | Cx3cr1        | - |
| E-DMM57 | Cdkn2a <sup>+/+</sup> _C57 | SIN.LV.SF.GFP | LIVER | 9  | 123475354 | - | NM_030692    | Sacm11        | + |
| E-DMM59 | Cdkn2a <sup>+/+</sup> _C57 | SIN.LV.SF.GFP | LIVER | 9  | 123717765 | + | NM_030712    | Cxcr6         | + |
| E-DMM59 | Cdkn2a <sup>+/+</sup> _C57 | SIN.LV.SF.GFP | LIVER | 10 | 7655690   | - | NM_138667    | Map3k7ip2     | - |
| E-DMM50 | Cdkn2a <sup>+/+</sup> _C57 | SIN.LV.SF.GFP | LIVER | 10 | 7668320   | + | NM_138667    | Map3k7ip2     | - |
| E-DMM59 | Cdkn2a <sup>+/+</sup> _C57 | SIN.LV.SF.GFP | LIVER | 10 | 9546282   | + | NM_001081344 | Stxbp5        | - |
| E-DMM50 | Cdkn2a <sup>+/+</sup> _C57 | SIN.LV.SF.GFP | LIVER | 10 | 10203849  | - | NM_001127353 | 9130014G24Rik | - |
| E-DMM55 | Cdkn2a <sup>+/+</sup> _C57 | SIN.LV.SF.GFP | LIVER | 10 | 10874488  | - | NM_001077707 | Shprh         | + |
| E-DMM59 | Cdkn2a <sup>+/+</sup> _C57 | SIN.LV.SF.GFP | LIVER | 10 | 11008696  | - | NM_027968    | Fbxo30        | + |
| E-DMM48 | Cdkn2a <sup>+/+</sup> _C57 | SIN.LV.SF.GFP | LIVER | 10 | 12175671  | + | NM_011682    | Utrn          | - |
| E-DMM63 | Cdkn2a <sup>+/+</sup> _C57 | SIN.LV.SF.GFP | LIVER | 10 | 12222054  | + | NM_011682    | Utrn          | - |
| E-DMM59 | Cdkn2a <sup>+/+</sup> _C57 | SIN.LV.SF.GFP | LIVER | 10 | 12346686  | - | NM_011682    | Utrn          | - |
| E-DMM65 | Cdkn2a <sup>+/+</sup> _C57 | SIN.LV.SF.GFP | LIVER | 10 | 12502526  | - | NM_011682    | Utrn          | - |
| E-DMM63 | Cdkn2a <sup>+/+</sup> _C57 | SIN.LV.SF.GFP | LIVER | 10 | 12673729  | - | NM_175102    | Sf3b5         | + |
| E-DMM58 | Cdkn2a <sup>+/+</sup> _C57 | SIN.LV.SF.GFP | LIVER | 10 | 12948228  | - | NM_001033257 | Phactr2       | - |
| E-DMM63 | Cdkn2a <sup>+/+</sup> _C57 | SIN.LV.SF.GFP | LIVER | 10 | 12995241  | + | NM_001033257 | Phactr2       | - |
| E-DMM52 | Cdkn2a <sup>+/+</sup> _C57 | SIN.LV.SF.GFP | LIVER | 10 | 15663094  | + | NM_008703    | Nmbr          | + |
| E-DMM55 | Cdkn2a <sup>+/+</sup> _C57 | SIN.LV.SF.GFP | LIVER | 10 | 16561793  | + | NM_010828    | Cited2        | + |
| E-DMM58 | Cdkn2a <sup>+/+</sup> _C57 | SIN.LV.SF.GFP | LIVER | 10 | 17518442  | - | NM_138628    | Txlnb         | + |



|         |                            |               |       |    |          |   |              |               |   |
|---------|----------------------------|---------------|-------|----|----------|---|--------------|---------------|---|
| E-DMM57 | Cdkn2a <sup>+/+</sup> _C57 | SIN.LV.SF.GFP | LIVER | 10 | 17730924 | + | NM_028440    | 3110003A17Rik | - |
| E-DMM65 | Cdkn2a <sup>+/+</sup> _C57 | SIN.LV.SF.GFP | LIVER | 10 | 17731657 | + | NM_028440    | 3110003A17Rik | - |
| E-DMM63 | Cdkn2a <sup>+/+</sup> _C57 | SIN.LV.SF.GFP | LIVER | 10 | 18679883 | - | NM_009397    | Tnfaip3       | - |
| E-DMM65 | Cdkn2a <sup>+/+</sup> _C57 | SIN.LV.SF.GFP | LIVER | 10 | 19191035 | - | NM_053008    | Olig3         | + |
| E-DMM57 | Cdkn2a <sup>+/+</sup> _C57 | SIN.LV.SF.GFP | LIVER | 10 | 20611489 | + | NM_026203    | Ahi1          | + |
| E-DMM58 | Cdkn2a <sup>+/+</sup> _C57 | SIN.LV.SF.GFP | LIVER | 10 | 23614485 | + | NM_011704    | Vnn1          | + |
| E-DMM63 | Cdkn2a <sup>+/+</sup> _C57 | SIN.LV.SF.GFP | LIVER | 10 | 24378258 | - | NM_008813    | Enpp1         | - |
| E-DMM48 | Cdkn2a <sup>+/+</sup> _C57 | SIN.LV.SF.GFP | LIVER | 10 | 25211519 | + | NM_013511    | Epb4.112      | + |
| E-DMM50 | Cdkn2a <sup>+/+</sup> _C57 | SIN.LV.SF.GFP | LIVER | 10 | 26622915 | + | NM_176837    | Arhgap18      | + |
| E-DMM59 | Cdkn2a <sup>+/+</sup> _C57 | SIN.LV.SF.GFP | LIVER | 10 | 28306544 | - | NM_008983    | Ptprk         | + |
| E-DMM58 | Cdkn2a <sup>+/+</sup> _C57 | SIN.LV.SF.GFP | LIVER | 10 | 29013628 | - | NM_001110195 | Echdc1        | + |
| E-DMM63 | Cdkn2a <sup>+/+</sup> _C57 | SIN.LV.SF.GFP | LIVER | 10 | 29871620 | + | NM_001109747 | 2610036L11Rik | - |
| E-DMM58 | Cdkn2a <sup>+/+</sup> _C57 | SIN.LV.SF.GFP | LIVER | 10 | 30305455 | - | NM_028604    | Trmt11        | - |
| E-DMM50 | Cdkn2a <sup>+/+</sup> _C57 | SIN.LV.SF.GFP | LIVER | 10 | 30313221 | - | NM_028604    | Trmt11        | - |
| E-DMM52 | Cdkn2a <sup>+/+</sup> _C57 | SIN.LV.SF.GFP | LIVER | 10 | 34257068 | - | NM_001159544 | Frk           | + |
| E-DMM65 | Cdkn2a <sup>+/+</sup> _C57 | SIN.LV.SF.GFP | LIVER | 10 | 36716678 | + | NM_008229    | Hdac2         | + |
| E-DMM52 | Cdkn2a <sup>+/+</sup> _C57 | SIN.LV.SF.GFP | LIVER | 10 | 36719365 | - | NM_008229    | Hdac2         | + |
| E-DMM52 | Cdkn2a <sup>+/+</sup> _C57 | SIN.LV.SF.GFP | LIVER | 10 | 36933478 | + | NM_008538    | Marcks        | - |
| E-DMM59 | Cdkn2a <sup>+/+</sup> _C57 | SIN.LV.SF.GFP | LIVER | 10 | 37637960 | + | NM_008538    | Marcks        | - |
| E-DMM50 | Cdkn2a <sup>+/+</sup> _C57 | SIN.LV.SF.GFP | LIVER | 10 | 38862541 | + | NM_028006    | Tube1         | + |
| E-DMM58 | Cdkn2a <sup>+/+</sup> _C57 | SIN.LV.SF.GFP | LIVER | 10 | 39464084 | - | NM_011264    | Rev3l         | + |
| E-DMM57 | Cdkn2a <sup>+/+</sup> _C57 | SIN.LV.SF.GFP | LIVER | 10 | 39511806 | - | NM_011264    | Rev3l         | + |
| E-DMM52 | Cdkn2a <sup>+/+</sup> _C57 | SIN.LV.SF.GFP | LIVER | 10 | 39757658 | + | NM_001114332 | Slc16a10      | - |
| E-DMM57 | Cdkn2a <sup>+/+</sup> _C57 | SIN.LV.SF.GFP | LIVER | 10 | 41586668 | - | NM_001013370 | Sesn1         | + |
| E-DMM65 | Cdkn2a <sup>+/+</sup> _C57 | SIN.LV.SF.GFP | LIVER | 10 | 42235318 | - | NM_017472    | Snx3          | + |
| E-DMM59 | Cdkn2a <sup>+/+</sup> _C57 | SIN.LV.SF.GFP | LIVER | 10 | 42499174 | + | NM_153055    | Sec63         | + |
| E-DMM52 | Cdkn2a <sup>+/+</sup> _C57 | SIN.LV.SF.GFP | LIVER | 10 | 44742304 | + | NM_011156    | Prep          | + |
| E-DMM63 | Cdkn2a <sup>+/+</sup> _C57 | SIN.LV.SF.GFP | LIVER | 10 | 45178358 | + | NM_001031772 | Lin28b        | - |
| E-DMM65 | Cdkn2a <sup>+/+</sup> _C57 | SIN.LV.SF.GFP | LIVER | 10 | 48810710 | - | NM_001111268 | Grik2         | - |
| E-DMM63 | Cdkn2a <sup>+/+</sup> _C57 | SIN.LV.SF.GFP | LIVER | 10 | 49150435 | + | NM_001111268 | Grik2         | - |
| E-DMM64 | Cdkn2a <sup>+/+</sup> _C57 | SIN.LV.SF.GFP | LIVER | 10 | 50361338 | - | NM_001146089 | Ascc3         | + |

|         |                            |               |       |    |          |   |              |               |   |
|---------|----------------------------|---------------|-------|----|----------|---|--------------|---------------|---|
| E-DMM58 | Cdkn2a <sup>+/+</sup> _C57 | SIN.LV.SF.GFP | LIVER | 10 | 50493122 | - | NM_001146089 | Ascc3         | + |
| E-DMM50 | Cdkn2a <sup>+/+</sup> _C57 | SIN.LV.SF.GFP | LIVER | 10 | 51211430 | - | NM_013532    | Lilrb4        | + |
| E-DMM47 | Cdkn2a <sup>+/+</sup> _C57 | SIN.LV.SF.GFP | LIVER | 10 | 52080015 | + | NM_053187    | Gopc          | - |
| E-DMM52 | Cdkn2a <sup>+/+</sup> _C57 | SIN.LV.SF.GFP | LIVER | 10 | 53140936 | - | NM_001141927 | Pln           | + |
| E-DMM58 | Cdkn2a <sup>+/+</sup> _C57 | SIN.LV.SF.GFP | LIVER | 10 | 53788183 | - | NM_008548    | Man1a         | - |
| E-DMM57 | Cdkn2a <sup>+/+</sup> _C57 | SIN.LV.SF.GFP | LIVER | 10 | 55892653 | + | NM_001033385 | D630037F22Rik | - |
| E-DMM52 | Cdkn2a <sup>+/+</sup> _C57 | SIN.LV.SF.GFP | LIVER | 10 | 56107706 | - | NM_010288    | Gja1          | + |
| E-DMM59 | Cdkn2a <sup>+/+</sup> _C57 | SIN.LV.SF.GFP | LIVER | 10 | 57370462 | + | NM_001039052 | Pkib          | + |
| E-DMM52 | Cdkn2a <sup>+/+</sup> _C57 | SIN.LV.SF.GFP | LIVER | 10 | 57532524 | + | NM_020561    | Smpd13a       | + |
| E-DMM50 | Cdkn2a <sup>+/+</sup> _C57 | SIN.LV.SF.GFP | LIVER | 10 | 57822945 | - | NM_026148    | Lims1         | + |
| E-DMM50 | Cdkn2a <sup>+/+</sup> _C57 | SIN.LV.SF.GFP | LIVER | 10 | 62097362 | - | NM_053183    | Ddx50         | - |
| E-DMM57 | Cdkn2a <sup>+/+</sup> _C57 | SIN.LV.SF.GFP | LIVER | 10 | 62780990 | - | NM_026101    | Herc4         | + |
| E-DMM50 | Cdkn2a <sup>+/+</sup> _C57 | SIN.LV.SF.GFP | LIVER | 10 | 65980801 | + | NM_178606    | Reep3         | - |
| E-DMM58 | Cdkn2a <sup>+/+</sup> _C57 | SIN.LV.SF.GFP | LIVER | 10 | 66477306 | + | NM_178606    | Reep3         | - |
| E-DMM58 | Cdkn2a <sup>+/+</sup> _C57 | SIN.LV.SF.GFP | LIVER | 10 | 66600928 | - | NM_207221    | Jmjd1c        | + |
| E-DMM52 | Cdkn2a <sup>+/+</sup> _C57 | SIN.LV.SF.GFP | LIVER | 10 | 66622674 | - | NM_207221    | Jmjd1c        | + |
| E-DMM59 | Cdkn2a <sup>+/+</sup> _C57 | SIN.LV.SF.GFP | LIVER | 10 | 66660093 | - | NM_207221    | Jmjd1c        | + |
| E-DMM63 | Cdkn2a <sup>+/+</sup> _C57 | SIN.LV.SF.GFP | LIVER | 10 | 66722377 | - | NM_207221    | Jmjd1c        | + |
| E-DMM63 | Cdkn2a <sup>+/+</sup> _C57 | SIN.LV.SF.GFP | LIVER | 10 | 66742093 | + | NM_001036293 | Nrbf2         | - |
| E-DMM57 | Cdkn2a <sup>+/+</sup> _C57 | SIN.LV.SF.GFP | LIVER | 10 | 67531876 | + | NM_001081346 | Rtkn2         | + |
| E-DMM63 | Cdkn2a <sup>+/+</sup> _C57 | SIN.LV.SF.GFP | LIVER | 10 | 67829276 | - | NM_028491    | 1700040L02Rik | - |
| E-DMM58 | Cdkn2a <sup>+/+</sup> _C57 | SIN.LV.SF.GFP | LIVER | 10 | 72130949 | - | NM_025635    | Zwint         | + |
| E-DMM55 | Cdkn2a <sup>+/+</sup> _C57 | SIN.LV.SF.GFP | LIVER | 10 | 73766346 | - | NM_001142747 | Pcdh15        | + |
| E-DMM63 | Cdkn2a <sup>+/+</sup> _C57 | SIN.LV.SF.GFP | LIVER | 10 | 76509570 | + | NM_031196    | Slc19a1       | + |
| E-DMM48 | Cdkn2a <sup>+/+</sup> _C57 | SIN.LV.SF.GFP | LIVER | 10 | 78557918 | + | NM_001004362 | 2610008E11Rik | - |
| E-DMM63 | Cdkn2a <sup>+/+</sup> _C57 | SIN.LV.SF.GFP | LIVER | 10 | 80093709 | - | NM_001159591 | Csnk1g2       | + |
| E-DMM48 | Cdkn2a <sup>+/+</sup> _C57 | SIN.LV.SF.GFP | LIVER | 10 | 80611563 | - | NM_010731    | Zbtb7a        | + |
| E-DMM50 | Cdkn2a <sup>+/+</sup> _C57 | SIN.LV.SF.GFP | LIVER | 10 | 81593140 | - | NM_001024626 | Zfp873        | + |
| E-DMM55 | Cdkn2a <sup>+/+</sup> _C57 | SIN.LV.SF.GFP | LIVER | 10 | 81607130 | - | NM_001024626 | Zfp873        | + |
| E-DMM64 | Cdkn2a <sup>+/+</sup> _C57 | SIN.LV.SF.GFP | LIVER | 10 | 81825033 | + | NM_001135567 | 1190007I07Rik | - |
| E-DMM55 | Cdkn2a <sup>+/+</sup> _C57 | SIN.LV.SF.GFP | LIVER | 10 | 81832403 | - | NM_001135567 | 1190007I07Rik | - |

|          |                            |               |       |    |           |   |              |                    |   |
|----------|----------------------------|---------------|-------|----|-----------|---|--------------|--------------------|---|
| E-DMM50  | Cdkn2a <sup>+/+</sup> _C57 | SIN.LV.SF.GFP | LIVER | 10 | 88143150  | + | NM_011461    | Spic               | - |
| E-DMM57  | Cdkn2a <sup>+/+</sup> _C57 | SIN.LV.SF.GFP | LIVER | 10 | 89141038  | + | NM_198021    | Scyl2              | - |
| E-DMM59  | Cdkn2a <sup>+/+</sup> _C57 | SIN.LV.SF.GFP | LIVER | 10 | 89318448  | - | NM_001128086 | Anks1b             | + |
| E-DMM63  | Cdkn2a <sup>+/+</sup> _C57 | SIN.LV.SF.GFP | LIVER | 10 | 92581433  | - | NM_146239    | Pctk2              | + |
| E-DMM50  | Cdkn2a <sup>+/+</sup> _C57 | SIN.LV.SF.GFP | LIVER | 10 | 92645305  | + | NM_146239    | Pctk2              | + |
| E-DMM48  | Cdkn2a <sup>+/+</sup> _C57 | SIN.LV.SF.GFP | LIVER | 10 | 92672720  | + | NM_146239    | Pctk2              | + |
| E-DMM52  | Cdkn2a <sup>+/+</sup> _C57 | SIN.LV.SF.GFP | LIVER | 10 | 94615251  | + | NM_009950    | Cradd              | - |
| E-DMM57  | Cdkn2a <sup>+/+</sup> _C57 | SIN.LV.SF.GFP | LIVER | 10 | 96268007  | + | NM_007569    | Btg1               | + |
| E-DMM48  | Cdkn2a <sup>+/+</sup> _C57 | SIN.LV.SF.GFP | LIVER | 10 | 96399176  | + | NM_007569    | Btg1               | + |
| E-DMM59  | Cdkn2a <sup>+/+</sup> _C57 | SIN.LV.SF.GFP | LIVER | 10 | 97487556  | - | NM_025724    | 4921510H08Rik      | + |
| E-DMM52  | Cdkn2a <sup>+/+</sup> _C57 | SIN.LV.SF.GFP | LIVER | 10 | 98165581  | - | NM_026482    | Atp2b1             | + |
| E-DMM65  | Cdkn2a <sup>+/+</sup> _C57 | SIN.LV.SF.GFP | LIVER | 10 | 98247171  | + | NM_026482    | Atp2b1             | + |
| E-DMM52  | Cdkn2a <sup>+/+</sup> _C57 | SIN.LV.SF.GFP | LIVER | 10 | 98660085  | - | NM_027740    | Wdr51b             | + |
| E-DMM58  | Cdkn2a <sup>+/+</sup> _C57 | SIN.LV.SF.GFP | LIVER | 10 | 99383349  | + | NM_013598    | Kitl               | + |
| E-DMM59  | Cdkn2a <sup>+/+</sup> _C57 | SIN.LV.SF.GFP | LIVER | 10 | 99948951  | + | NM_001033332 | Tmtc3              | - |
| E-DMM63  | Cdkn2a <sup>+/+</sup> _C57 | SIN.LV.SF.GFP | LIVER | 10 | 99972301  | - | NM_146009    | Cep290             | + |
| E-DMM63  | Cdkn2a <sup>+/+</sup> _C57 | SIN.LV.SF.GFP | LIVER | 10 | 100862292 | + | NM_001081246 | 1700017N19Rik      | + |
| E-DMM50  | Cdkn2a <sup>+/+</sup> _C57 | SIN.LV.SF.GFP | LIVER | 10 | 102011581 | - | NM_146240    | Rassf9             | + |
| E-DMM63  | Cdkn2a <sup>+/+</sup> _C57 | SIN.LV.SF.GFP | LIVER | 10 | 103571815 | - | NM_175328    | Slc6a15            | + |
| E-DMM52  | Cdkn2a <sup>+/+</sup> _C57 | SIN.LV.SF.GFP | LIVER | 10 | 104903080 | - | NM_177368    | Tmtc2              | - |
| E-DMM55  | Cdkn2a <sup>+/+</sup> _C57 | SIN.LV.SF.GFP | LIVER | 10 | 106723671 | - | NM_001033223 | Lin7a              | + |
| E-DMM59  | Cdkn2a <sup>+/+</sup> _C57 | SIN.LV.SF.GFP | LIVER | 10 | 107497060 | - | NM_027892    | Ppp1r12a           | + |
| E-DMM57  | Cdkn2a <sup>+/+</sup> _C57 | SIN.LV.SF.GFP | LIVER | 10 | 107600779 | + | NM_027892    | Ppp1r12a           | + |
| E-DMM52  | Cdkn2a <sup>+/+</sup> _C57 | SIN.LV.SF.GFP | LIVER | 10 | 108931555 | - | NM_001081035 | Nav3               | - |
| E-DMM149 | Cdkn2a <sup>+/+</sup> _C57 | SIN.LV.SF.GFP | LIVER | 10 | 110198805 | - | NM_178609    | E2f7               | + |
| E-DMM47  | Cdkn2a <sup>+/+</sup> _C57 | SIN.LV.SF.GFP | LIVER | 10 | 110978054 | + | NM_009344    | Phlda1             | + |
| E-DMM63  | Cdkn2a <sup>+/+</sup> _C57 | SIN.LV.SF.GFP | LIVER | 10 | 112371858 | - | NM_001033474 | ENSMUSG00000074747 | - |
| E-DMM48  | Cdkn2a <sup>+/+</sup> _C57 | SIN.LV.SF.GFP | LIVER | 10 | 112418680 | - | NM_001033474 | ENSMUSG00000074747 | - |
| E-DMM48  | Cdkn2a <sup>+/+</sup> _C57 | SIN.LV.SF.GFP | LIVER | 10 | 113666989 | - | NM_146241    | Trhde              | - |
| E-DMM58  | Cdkn2a <sup>+/+</sup> _C57 | SIN.LV.SF.GFP | LIVER | 10 | 115932412 | - | NM_001037846 | Cnot2              | - |
| E-DMM52  | Cdkn2a <sup>+/+</sup> _C57 | SIN.LV.SF.GFP | LIVER | 10 | 115949513 | - | NM_001037848 | Cnot2              | - |

|         |                            |               |       |    |           |   |              |         |   |
|---------|----------------------------|---------------|-------|----|-----------|---|--------------|---------|---|
| E-DMM55 | Cdkn2a <sup>+/+</sup> _C57 | SIN.LV.SF.GFP | LIVER | 10 | 115963141 | + | NM_001037848 | Cnot2   | - |
| E-DMM63 | Cdkn2a <sup>+/+</sup> _C57 | SIN.LV.SF.GFP | LIVER | 10 | 118012491 | + | NM_008337    | Ifng    | + |
| E-DMM59 | Cdkn2a <sup>+/+</sup> _C57 | SIN.LV.SF.GFP | LIVER | 10 | 118201594 | - | NM_001014390 | Dyrk2   | - |
| E-DMM57 | Cdkn2a <sup>+/+</sup> _C57 | SIN.LV.SF.GFP | LIVER | 10 | 118245907 | + | NM_001014390 | Dyrk2   | - |
| E-DMM52 | Cdkn2a <sup>+/+</sup> _C57 | SIN.LV.SF.GFP | LIVER | 10 | 119223617 | - | NM_133442    | Grip1   | + |
| E-DMM59 | Cdkn2a <sup>+/+</sup> _C57 | SIN.LV.SF.GFP | LIVER | 10 | 119607927 | - | NM_028679    | Irak3   | - |
| E-DMM65 | Cdkn2a <sup>+/+</sup> _C57 | SIN.LV.SF.GFP | LIVER | 10 | 119871851 | + | NM_010441    | Hmga2   | - |
| E-DMM58 | Cdkn2a <sup>+/+</sup> _C57 | SIN.LV.SF.GFP | LIVER | 10 | 120710185 | - | NM_029364    | Gns     | + |
| E-DMM58 | Cdkn2a <sup>+/+</sup> _C57 | SIN.LV.SF.GFP | LIVER | 10 | 121811937 | - | NM_016847    | Avpr1a  | + |
| E-DMM63 | Cdkn2a <sup>+/+</sup> _C57 | SIN.LV.SF.GFP | LIVER | 10 | 122621312 | - | NM_027604    | Usp15   | - |
| E-DMM52 | Cdkn2a <sup>+/+</sup> _C57 | SIN.LV.SF.GFP | LIVER | 10 | 122821646 | + | NM_182807    | Fam19a2 | + |
| E-DMM52 | Cdkn2a <sup>+/+</sup> _C57 | SIN.LV.SF.GFP | LIVER | 10 | 124931652 | - | NM_011391    | Slc16a7 | - |
| E-DMM63 | Cdkn2a <sup>+/+</sup> _C57 | SIN.LV.SF.GFP | LIVER | 10 | 127393769 | + | NM_013786    | Hsd17b6 | - |
| E-DMM58 | Cdkn2a <sup>+/+</sup> _C57 | SIN.LV.SF.GFP | LIVER | 10 | 127396288 | + | NM_013786    | Hsd17b6 | - |
| E-DMM63 | Cdkn2a <sup>+/+</sup> _C57 | SIN.LV.SF.GFP | LIVER | 10 | 127915566 | + | NM_001114096 | Smarcc2 | + |
| E-DMM52 | Cdkn2a <sup>+/+</sup> _C57 | SIN.LV.SF.GFP | LIVER | 11 | 3042228   | + | NM_030207    | Sfi1    | - |
| E-DMM58 | Cdkn2a <sup>+/+</sup> _C57 | SIN.LV.SF.GFP | LIVER | 11 | 3052782   | + | NM_030207    | Sfi1    | - |
| E-DMM63 | Cdkn2a <sup>+/+</sup> _C57 | SIN.LV.SF.GFP | LIVER | 11 | 3055307   | - | NM_030207    | Sfi1    | - |
| E-DMM52 | Cdkn2a <sup>+/+</sup> _C57 | SIN.LV.SF.GFP | LIVER | 11 | 3067574   | + | NM_030207    | Sfi1    | - |
| E-DMM57 | Cdkn2a <sup>+/+</sup> _C57 | SIN.LV.SF.GFP | LIVER | 11 | 3069838   | + | NM_030207    | Sfi1    | - |
| E-DMM57 | Cdkn2a <sup>+/+</sup> _C57 | SIN.LV.SF.GFP | LIVER | 11 | 3077521   | + | NM_030207    | Sfi1    | - |
| E-DMM59 | Cdkn2a <sup>+/+</sup> _C57 | SIN.LV.SF.GFP | LIVER | 11 | 3078704   | + | NM_030207    | Sfi1    | - |
| E-DMM49 | Cdkn2a <sup>+/+</sup> _C57 | SIN.LV.SF.GFP | LIVER | 11 | 3087152   | + | NM_030207    | Sfi1    | - |
| E-DMM52 | Cdkn2a <sup>+/+</sup> _C57 | SIN.LV.SF.GFP | LIVER | 11 | 3090531   | + | NM_030207    | Sfi1    | - |
| E-DMM65 | Cdkn2a <sup>+/+</sup> _C57 | SIN.LV.SF.GFP | LIVER | 11 | 3092693   | + | NM_030207    | Sfi1    | - |
| E-DMM59 | Cdkn2a <sup>+/+</sup> _C57 | SIN.LV.SF.GFP | LIVER | 11 | 3580315   | - | NM_001159288 | More2a  | + |
| E-DMM59 | Cdkn2a <sup>+/+</sup> _C57 | SIN.LV.SF.GFP | LIVER | 11 | 4705814   | + | NM_010898    | Nf2     | - |
| E-DMM49 | Cdkn2a <sup>+/+</sup> _C57 | SIN.LV.SF.GFP | LIVER | 11 | 5790600   | - | NM_022879    | Myl7    | - |
| E-DMM63 | Cdkn2a <sup>+/+</sup> _C57 | SIN.LV.SF.GFP | LIVER | 11 | 6328667   | + | NM_008907    | Ppia    | + |
| E-DMM50 | Cdkn2a <sup>+/+</sup> _C57 | SIN.LV.SF.GFP | LIVER | 11 | 6702117   | - | NM_019511    | Ramp3   | + |
| E-DMM50 | Cdkn2a <sup>+/+</sup> _C57 | SIN.LV.SF.GFP | LIVER | 11 | 8450231   | - | NM_001083587 | Tns3    | - |

|         |                            |               |       |    |          |   |              |           |   |
|---------|----------------------------|---------------|-------|----|----------|---|--------------|-----------|---|
| E-DMM58 | Cdkn2a <sup>+/+</sup> _C57 | SIN.LV.SF.GFP | LIVER | 11 | 9372043  | - | NM_178259    | Abca13    | + |
| E-DMM52 | Cdkn2a <sup>+/+</sup> _C57 | SIN.LV.SF.GFP | LIVER | 11 | 14034997 | + | NR_002893    | Pom121l12 | + |
| E-DMM58 | Cdkn2a <sup>+/+</sup> _C57 | SIN.LV.SF.GFP | LIVER | 11 | 17167633 | + | NM_020558    | C1d       | + |
| E-DMM52 | Cdkn2a <sup>+/+</sup> _C57 | SIN.LV.SF.GFP | LIVER | 11 | 19978221 | + | NM_146243    | Actr2     | - |
| E-DMM65 | Cdkn2a <sup>+/+</sup> _C57 | SIN.LV.SF.GFP | LIVER | 11 | 19990297 | - | NM_146243    | Actr2     | - |
| E-DMM58 | Cdkn2a <sup>+/+</sup> _C57 | SIN.LV.SF.GFP | LIVER | 11 | 21169251 | + | NM_139061    | Vps54     | + |
| E-DMM58 | Cdkn2a <sup>+/+</sup> _C57 | SIN.LV.SF.GFP | LIVER | 11 | 21253645 | + | NM_139297    | Ugp2      | - |
| E-DMM58 | Cdkn2a <sup>+/+</sup> _C57 | SIN.LV.SF.GFP | LIVER | 11 | 21255778 | - | NM_139297    | Ugp2      | - |
| E-DMM59 | Cdkn2a <sup>+/+</sup> _C57 | SIN.LV.SF.GFP | LIVER | 11 | 22906416 | - | NM_009837    | Cct4      | + |
| E-DMM58 | Cdkn2a <sup>+/+</sup> _C57 | SIN.LV.SF.GFP | LIVER | 11 | 23619324 | + | NM_001033654 | Pus10     | + |
| E-DMM50 | Cdkn2a <sup>+/+</sup> _C57 | SIN.LV.SF.GFP | LIVER | 11 | 28616961 | - | NM_181577    | Ccdc85a   | - |
| E-DMM48 | Cdkn2a <sup>+/+</sup> _C57 | SIN.LV.SF.GFP | LIVER | 11 | 29046156 | + | NM_027869    | Pnpt1     | + |
| E-DMM58 | Cdkn2a <sup>+/+</sup> _C57 | SIN.LV.SF.GFP | LIVER | 11 | 29050706 | + | NM_027869    | Pnpt1     | + |
| E-DMM57 | Cdkn2a <sup>+/+</sup> _C57 | SIN.LV.SF.GFP | LIVER | 11 | 29109507 | - | NM_134034    | Smek2     | + |
| E-DMM50 | Cdkn2a <sup>+/+</sup> _C57 | SIN.LV.SF.GFP | LIVER | 11 | 29350996 | - | NM_176841    | Ccdc88a   | + |
| E-DMM63 | Cdkn2a <sup>+/+</sup> _C57 | SIN.LV.SF.GFP | LIVER | 11 | 29380401 | + | NM_176841    | Ccdc88a   | + |
| E-DMM65 | Cdkn2a <sup>+/+</sup> _C57 | SIN.LV.SF.GFP | LIVER | 11 | 32568576 | - | NM_134015    | Fbxw11    | + |
| E-DMM52 | Cdkn2a <sup>+/+</sup> _C57 | SIN.LV.SF.GFP | LIVER | 11 | 33181270 | + | NM_023146    | Ranbp17   | - |
| E-DMM58 | Cdkn2a <sup>+/+</sup> _C57 | SIN.LV.SF.GFP | LIVER | 11 | 34273433 | + | NM_001025382 | Gm6041    | + |
| E-DMM48 | Cdkn2a <sup>+/+</sup> _C57 | SIN.LV.SF.GFP | LIVER | 11 | 35589936 | + | NM_145962    | Pank3     | + |
| E-DMM50 | Cdkn2a <sup>+/+</sup> _C57 | SIN.LV.SF.GFP | LIVER | 11 | 37287438 | + | NM_011856    | Odz2      | - |
| E-DMM58 | Cdkn2a <sup>+/+</sup> _C57 | SIN.LV.SF.GFP | LIVER | 11 | 40504020 | + | NM_134017    | Mat2b     | - |
| E-DMM50 | Cdkn2a <sup>+/+</sup> _C57 | SIN.LV.SF.GFP | LIVER | 11 | 43041326 | - | NM_176999    | Atp10b    | + |
| E-DMM52 | Cdkn2a <sup>+/+</sup> _C57 | SIN.LV.SF.GFP | LIVER | 11 | 50126990 | - | NM_001110499 | Canx      | - |
| E-DMM57 | Cdkn2a <sup>+/+</sup> _C57 | SIN.LV.SF.GFP | LIVER | 11 | 54584594 | + | NM_178626    | Cdc42se2  | - |
| E-DMM49 | Cdkn2a <sup>+/+</sup> _C57 | SIN.LV.SF.GFP | LIVER | 11 | 54780001 | - | NM_021327    | Tnip1     | - |
| E-DMM58 | Cdkn2a <sup>+/+</sup> _C57 | SIN.LV.SF.GFP | LIVER | 11 | 54883480 | - | NM_177471    | Ccdc69    | - |
| E-DMM63 | Cdkn2a <sup>+/+</sup> _C57 | SIN.LV.SF.GFP | LIVER | 11 | 57999904 | - | NM_001135115 | Gm12250   | + |
| E-DMM57 | Cdkn2a <sup>+/+</sup> _C57 | SIN.LV.SF.GFP | LIVER | 11 | 58061890 | - | NM_019440    | Irgm2     | + |
| E-DMM52 | Cdkn2a <sup>+/+</sup> _C57 | SIN.LV.SF.GFP | LIVER | 11 | 69449516 | + | NM_011814    | Fxr2      | + |
| E-DMM52 | Cdkn2a <sup>+/+</sup> _C57 | SIN.LV.SF.GFP | LIVER | 11 | 70400417 | - | NM_001045959 | Mink1     | + |

|         |                            |               |       |    |           |   |              |               |   |
|---------|----------------------------|---------------|-------|----|-----------|---|--------------|---------------|---|
| E-DMM63 | Cdkn2a <sup>+/+</sup> _C57 | SIN.LV.SF.GFP | LIVER | 11 | 70412101  | + | NM_001045959 | Mink1         | + |
| E-DMM58 | Cdkn2a <sup>+/+</sup> _C57 | SIN.LV.SF.GFP | LIVER | 11 | 71567263  | - | NM_177618    | Wscd1         | + |
| E-DMM52 | Cdkn2a <sup>+/+</sup> _C57 | SIN.LV.SF.GFP | LIVER | 11 | 77127723  | - | NM_177710    | Ssh2          | + |
| E-DMM57 | Cdkn2a <sup>+/+</sup> _C57 | SIN.LV.SF.GFP | LIVER | 11 | 81903748  | + | NM_011331    | Ccl12         | + |
| E-DMM50 | Cdkn2a <sup>+/+</sup> _C57 | SIN.LV.SF.GFP | LIVER | 11 | 83302776  | + | NM_027427    | Taf15         | + |
| E-DMM48 | Cdkn2a <sup>+/+</sup> _C57 | SIN.LV.SF.GFP | LIVER | 11 | 84272136  | - | NM_019816    | Aatf          | - |
| E-DMM63 | Cdkn2a <sup>+/+</sup> _C57 | SIN.LV.SF.GFP | LIVER | 11 | 86420790  | - | NM_029478    | Tmem49        | - |
| E-DMM57 | Cdkn2a <sup>+/+</sup> _C57 | SIN.LV.SF.GFP | LIVER | 11 | 86452912  | - | NM_029478    | Tmem49        | - |
| E-DMM63 | Cdkn2a <sup>+/+</sup> _C57 | SIN.LV.SF.GFP | LIVER | 11 | 86475595  | - | NM_029478    | Tmem49        | - |
| E-DMM63 | Cdkn2a <sup>+/+</sup> _C57 | SIN.LV.SF.GFP | LIVER | 11 | 86620190  | + | NM_026191    | Dhx40         | - |
| E-DMM57 | Cdkn2a <sup>+/+</sup> _C57 | SIN.LV.SF.GFP | LIVER | 11 | 90435051  | - | NM_011505    | Stxbp4        | - |
| E-DMM50 | Cdkn2a <sup>+/+</sup> _C57 | SIN.LV.SF.GFP | LIVER | 11 | 94015679  | - | NM_001025428 | Spag9         | + |
| E-DMM50 | Cdkn2a <sup>+/+</sup> _C57 | SIN.LV.SF.GFP | LIVER | 11 | 94077569  | - | NM_009427    | Tob1          | + |
| E-DMM52 | Cdkn2a <sup>+/+</sup> _C57 | SIN.LV.SF.GFP | LIVER | 11 | 95590075  | + | NM_201609    | Zfp652        | + |
| E-DMM63 | Cdkn2a <sup>+/+</sup> _C57 | SIN.LV.SF.GFP | LIVER | 11 | 100464494 | - | NM_019795    | Dnajc7        | - |
| E-DMM50 | Cdkn2a <sup>+/+</sup> _C57 | SIN.LV.SF.GFP | LIVER | 11 | 101105471 | - | NM_019444    | Ramp2         | + |
| E-DMM55 | Cdkn2a <sup>+/+</sup> _C57 | SIN.LV.SF.GFP | LIVER | 11 | 101396668 | - | NM_009764    | Brca1         | - |
| E-DMM55 | Cdkn2a <sup>+/+</sup> _C57 | SIN.LV.SF.GFP | LIVER | 11 | 102128264 | - | NM_153544    | BC030867      | + |
| E-DMM50 | Cdkn2a <sup>+/+</sup> _C57 | SIN.LV.SF.GFP | LIVER | 11 | 106333147 | - | NM_023913    | Ern1          | - |
| E-DMM63 | Cdkn2a <sup>+/+</sup> _C57 | SIN.LV.SF.GFP | LIVER | 11 | 108049417 | - | NM_011101    | Prkca         | - |
| E-DMM50 | Cdkn2a <sup>+/+</sup> _C57 | SIN.LV.SF.GFP | LIVER | 11 | 110020125 | - | NM_147220    | Abca9         | - |
| E-DMM50 | Cdkn2a <sup>+/+</sup> _C57 | SIN.LV.SF.GFP | LIVER | 11 | 110851083 | + | NM_010604    | Kcnj16        | + |
| E-DMM58 | Cdkn2a <sup>+/+</sup> _C57 | SIN.LV.SF.GFP | LIVER | 11 | 120009645 | + | NM_024249    | Slc38a10      | - |
| E-DMM58 | Cdkn2a <sup>+/+</sup> _C57 | SIN.LV.SF.GFP | LIVER | 11 | 120419665 | - | NM_011032    | P4hb          | - |
| E-DMM48 | Cdkn2a <sup>+/+</sup> _C57 | SIN.LV.SF.GFP | LIVER | 12 | 3254143   | + | NM_016676    | Rab10         | - |
| E-DMM58 | Cdkn2a <sup>+/+</sup> _C57 | SIN.LV.SF.GFP | LIVER | 12 | 3421298   | - | NM_172421    | Asxl2         | + |
| E-DMM63 | Cdkn2a <sup>+/+</sup> _C57 | SIN.LV.SF.GFP | LIVER | 12 | 4974618   | - | NM_001099628 | Atad2b        | + |
| E-DMM52 | Cdkn2a <sup>+/+</sup> _C57 | SIN.LV.SF.GFP | LIVER | 12 | 7962549   | + | NM_009693    | Apob          | + |
| E-DMM59 | Cdkn2a <sup>+/+</sup> _C57 | SIN.LV.SF.GFP | LIVER | 12 | 8267769   | - | NM_172401    | 1110057K04Rik | + |
| E-DMM58 | Cdkn2a <sup>+/+</sup> _C57 | SIN.LV.SF.GFP | LIVER | 12 | 8507184   | + | NM_007483    | Rhob          | - |
| E-DMM57 | Cdkn2a <sup>+/+</sup> _C57 | SIN.LV.SF.GFP | LIVER | 12 | 11275990  | + | NM_025695    | Smc6          | + |

|         |                            |               |       |    |          |   |              |               |   |
|---------|----------------------------|---------------|-------|----|----------|---|--------------|---------------|---|
| E-DMM57 | Cdkn2a <sup>+/+</sup> _C57 | SIN.LV.SF.GFP | LIVER | 12 | 11286120 | - | NM_025695    | Smc6          | + |
| E-DMM52 | Cdkn2a <sup>+/+</sup> _C57 | SIN.LV.SF.GFP | LIVER | 12 | 11300964 | + | NM_025695    | Smc6          | + |
| E-DMM48 | Cdkn2a <sup>+/+</sup> _C57 | SIN.LV.SF.GFP | LIVER | 12 | 12812034 | + | NM_008709    | Mycn          | - |
| E-DMM65 | Cdkn2a <sup>+/+</sup> _C57 | SIN.LV.SF.GFP | LIVER | 12 | 16111316 | + | NM_144551    | Trib2         | - |
| E-DMM59 | Cdkn2a <sup>+/+</sup> _C57 | SIN.LV.SF.GFP | LIVER | 12 | 16905322 | - | NM_009072    | Rock2         | + |
| E-DMM63 | Cdkn2a <sup>+/+</sup> _C57 | SIN.LV.SF.GFP | LIVER | 12 | 17418594 | + | NM_001008421 | Nol10         | + |
| E-DMM59 | Cdkn2a <sup>+/+</sup> _C57 | SIN.LV.SF.GFP | LIVER | 12 | 21222689 | - | NM_001135192 | Ddef2         | + |
| E-DMM63 | Cdkn2a <sup>+/+</sup> _C57 | SIN.LV.SF.GFP | LIVER | 12 | 25790201 | + | NM_010496    | Id2           | - |
| E-DMM49 | Cdkn2a <sup>+/+</sup> _C57 | SIN.LV.SF.GFP | LIVER | 12 | 25919108 | + | NM_010496    | Id2           | - |
| E-DMM48 | Cdkn2a <sup>+/+</sup> _C57 | SIN.LV.SF.GFP | LIVER | 12 | 28629904 | - | NM_009234    | Sox11         | - |
| E-DMM59 | Cdkn2a <sup>+/+</sup> _C57 | SIN.LV.SF.GFP | LIVER | 12 | 29468385 | + | NM_201357    | Tssc1         | + |
| E-DMM50 | Cdkn2a <sup>+/+</sup> _C57 | SIN.LV.SF.GFP | LIVER | 12 | 31413635 | - | NM_172049    | Tmem18        | + |
| E-DMM52 | Cdkn2a <sup>+/+</sup> _C57 | SIN.LV.SF.GFP | LIVER | 12 | 31643708 | + | NM_013709    | Sh3yl1        | + |
| E-DMM65 | Cdkn2a <sup>+/+</sup> _C57 | SIN.LV.SF.GFP | LIVER | 12 | 35391210 | - | NM_024124    | Hdac9         | - |
| E-DMM55 | Cdkn2a <sup>+/+</sup> _C57 | SIN.LV.SF.GFP | LIVER | 12 | 37259269 | - | NM_178629    | 4930579E17Rik | + |
| E-DMM52 | Cdkn2a <sup>+/+</sup> _C57 | SIN.LV.SF.GFP | LIVER | 12 | 37734291 | + | NM_008584    | Meox2         | + |
| E-DMM52 | Cdkn2a <sup>+/+</sup> _C57 | SIN.LV.SF.GFP | LIVER | 12 | 39522867 | + | NM_007960    | Etv1          | + |
| E-DMM57 | Cdkn2a <sup>+/+</sup> _C57 | SIN.LV.SF.GFP | LIVER | 12 | 39582340 | + | NM_007960    | Etv1          | + |
| E-DMM63 | Cdkn2a <sup>+/+</sup> _C57 | SIN.LV.SF.GFP | LIVER | 12 | 40644952 | - | NM_001039515 | Arl4a         | - |
| E-DMM57 | Cdkn2a <sup>+/+</sup> _C57 | SIN.LV.SF.GFP | LIVER | 12 | 40759661 | - | NM_001039515 | Arl4a         | - |
| E-DMM59 | Cdkn2a <sup>+/+</sup> _C57 | SIN.LV.SF.GFP | LIVER | 12 | 41161854 | - | NM_172575    | Zfp277        | - |
| E-DMM48 | Cdkn2a <sup>+/+</sup> _C57 | SIN.LV.SF.GFP | LIVER | 12 | 41490869 | - | NM_172803    | Dock4         | + |
| E-DMM50 | Cdkn2a <sup>+/+</sup> _C57 | SIN.LV.SF.GFP | LIVER | 12 | 41770941 | + | NM_053122    | Immp2l        | + |
| E-DMM57 | Cdkn2a <sup>+/+</sup> _C57 | SIN.LV.SF.GFP | LIVER | 12 | 41956411 | - | NM_053122    | Immp2l        | + |
| E-DMM47 | Cdkn2a <sup>+/+</sup> _C57 | SIN.LV.SF.GFP | LIVER | 12 | 45041928 | + | NM_013760    | Dnajb9        | - |
| E-DMM65 | Cdkn2a <sup>+/+</sup> _C57 | SIN.LV.SF.GFP | LIVER | 12 | 45406677 | - | NM_026164    | Pnpla8        | + |
| E-DMM57 | Cdkn2a <sup>+/+</sup> _C57 | SIN.LV.SF.GFP | LIVER | 12 | 45953643 | + | NM_144552    | Stxbp6        | - |
| E-DMM57 | Cdkn2a <sup>+/+</sup> _C57 | SIN.LV.SF.GFP | LIVER | 12 | 46056160 | - | NM_144552    | Stxbp6        | - |
| E-DMM63 | Cdkn2a <sup>+/+</sup> _C57 | SIN.LV.SF.GFP | LIVER | 12 | 46157946 | + | NM_144552    | Stxbp6        | - |
| E-DMM48 | Cdkn2a <sup>+/+</sup> _C57 | SIN.LV.SF.GFP | LIVER | 12 | 46979785 | - | NM_144552    | Stxbp6        | - |
| E-DMM58 | Cdkn2a <sup>+/+</sup> _C57 | SIN.LV.SF.GFP | LIVER | 12 | 47002387 | - | NM_144552    | Stxbp6        | - |

|         |                            |               |       |    |          |   |              |          |   |
|---------|----------------------------|---------------|-------|----|----------|---|--------------|----------|---|
| E-DMM48 | Cdkn2a <sup>+/+</sup> _C57 | SIN.LV.SF.GFP | LIVER | 12 | 47884544 | - | NM_144552    | Stxbp6   | - |
| E-DMM50 | Cdkn2a <sup>+/+</sup> _C57 | SIN.LV.SF.GFP | LIVER | 12 | 47904209 | - | NM_144552    | Stxbp6   | - |
| E-DMM48 | Cdkn2a <sup>+/+</sup> _C57 | SIN.LV.SF.GFP | LIVER | 12 | 47986592 | + | NM_144552    | Stxbp6   | - |
| E-DMM52 | Cdkn2a <sup>+/+</sup> _C57 | SIN.LV.SF.GFP | LIVER | 12 | 51701826 | - | NM_008858    | Prkd1    | - |
| E-DMM52 | Cdkn2a <sup>+/+</sup> _C57 | SIN.LV.SF.GFP | LIVER | 12 | 52458699 | + | NM_001015099 | G2e3     | + |
| E-DMM63 | Cdkn2a <sup>+/+</sup> _C57 | SIN.LV.SF.GFP | LIVER | 12 | 53257360 | - | NM_029760    | Nubpl    | + |
| E-DMM58 | Cdkn2a <sup>+/+</sup> _C57 | SIN.LV.SF.GFP | LIVER | 12 | 53624050 | + | NM_009706    | Arhgap5  | + |
| E-DMM63 | Cdkn2a <sup>+/+</sup> _C57 | SIN.LV.SF.GFP | LIVER | 12 | 56527415 | - | NM_011968    | PsmA6    | + |
| E-DMM57 | Cdkn2a <sup>+/+</sup> _C57 | SIN.LV.SF.GFP | LIVER | 12 | 56761615 | + | NM_001003719 | Garnl1   | - |
| E-DMM57 | Cdkn2a <sup>+/+</sup> _C57 | SIN.LV.SF.GFP | LIVER | 12 | 56972934 | - | NM_001037756 | Brms11   | + |
| E-DMM48 | Cdkn2a <sup>+/+</sup> _C57 | SIN.LV.SF.GFP | LIVER | 12 | 59438709 | + | NM_025809    | Clec14a  | - |
| E-DMM49 | Cdkn2a <sup>+/+</sup> _C57 | SIN.LV.SF.GFP | LIVER | 12 | 60153006 | - | NM_030057    | Trappc6b | - |
| E-DMM55 | Cdkn2a <sup>+/+</sup> _C57 | SIN.LV.SF.GFP | LIVER | 12 | 63693714 | - | NM_178714    | Lrn5     | + |
| E-DMM52 | Cdkn2a <sup>+/+</sup> _C57 | SIN.LV.SF.GFP | LIVER | 12 | 66088288 | - | NM_025707    | Klhl28   | - |
| E-DMM63 | Cdkn2a <sup>+/+</sup> _C57 | SIN.LV.SF.GFP | LIVER | 12 | 66141110 | - | NM_177806    | Prpf39   | + |
| E-DMM52 | Cdkn2a <sup>+/+</sup> _C57 | SIN.LV.SF.GFP | LIVER | 12 | 66156690 | - | NM_177806    | Prpf39   | + |
| E-DMM50 | Cdkn2a <sup>+/+</sup> _C57 | SIN.LV.SF.GFP | LIVER | 12 | 66266860 | - | NM_172578    | C79407   | - |
| E-DMM59 | Cdkn2a <sup>+/+</sup> _C57 | SIN.LV.SF.GFP | LIVER | 12 | 67654246 | + | NM_207010    | Mdga2    | - |
| E-DMM50 | Cdkn2a <sup>+/+</sup> _C57 | SIN.LV.SF.GFP | LIVER | 12 | 67870839 | + | NM_207010    | Mdga2    | - |
| E-DMM65 | Cdkn2a <sup>+/+</sup> _C57 | SIN.LV.SF.GFP | LIVER | 12 | 68343060 | + | NM_207010    | Mdga2    | - |
| E-DMM48 | Cdkn2a <sup>+/+</sup> _C57 | SIN.LV.SF.GFP | LIVER | 12 | 68988617 | - | NM_207010    | Mdga2    | - |
| E-DMM59 | Cdkn2a <sup>+/+</sup> _C57 | SIN.LV.SF.GFP | LIVER | 12 | 70513439 | + | NM_007481    | Arf6     | + |
| E-DMM57 | Cdkn2a <sup>+/+</sup> _C57 | SIN.LV.SF.GFP | LIVER | 12 | 70701520 | - | NM_001135559 | Sos2     | - |
| E-DMM52 | Cdkn2a <sup>+/+</sup> _C57 | SIN.LV.SF.GFP | LIVER | 12 | 70759779 | - | NM_001135559 | Sos2     | - |
| E-DMM59 | Cdkn2a <sup>+/+</sup> _C57 | SIN.LV.SF.GFP | LIVER | 12 | 70947990 | + | NM_201519    | Map4k5   | - |
| E-DMM59 | Cdkn2a <sup>+/+</sup> _C57 | SIN.LV.SF.GFP | LIVER | 12 | 71050687 | - | NM_178628    | Atl1     | + |
| E-DMM58 | Cdkn2a <sup>+/+</sup> _C57 | SIN.LV.SF.GFP | LIVER | 12 | 72053594 | - | NM_019785    | Actr10   | + |
| E-DMM52 | Cdkn2a <sup>+/+</sup> _C57 | SIN.LV.SF.GFP | LIVER | 12 | 77334253 | + | NM_001159532 | Tex21    | - |
| E-DMM57 | Cdkn2a <sup>+/+</sup> _C57 | SIN.LV.SF.GFP | LIVER | 12 | 79525446 | + | NM_172952    | Gphn     | + |
| E-DMM50 | Cdkn2a <sup>+/+</sup> _C57 | SIN.LV.SF.GFP | LIVER | 12 | 79544680 | - | NM_172952    | Gphn     | + |
| E-DMM57 | Cdkn2a <sup>+/+</sup> _C57 | SIN.LV.SF.GFP | LIVER | 12 | 79629260 | - | NM_172952    | Gphn     | + |



|         |                            |               |       |    |           |   |              |               |   |
|---------|----------------------------|---------------|-------|----|-----------|---|--------------|---------------|---|
| E-DMM52 | Cdkn2a <sup>+/+</sup> _C57 | SIN.LV.SF.GFP | LIVER | 12 | 81920157  | + | NM_178682    | 4933426M11Rik | + |
| E-DMM52 | Cdkn2a <sup>+/+</sup> _C57 | SIN.LV.SF.GFP | LIVER | 12 | 81922600  | - | NM_178682    | 4933426M11Rik | + |
| E-DMM63 | Cdkn2a <sup>+/+</sup> _C57 | SIN.LV.SF.GFP | LIVER | 12 | 87126552  | - | NM_145447    | Mfsd7c        | + |
| E-DMM58 | Cdkn2a <sup>+/+</sup> _C57 | SIN.LV.SF.GFP | LIVER | 12 | 87595431  | + | NM_027405    | 1700020O03Rik | + |
| E-DMM55 | Cdkn2a <sup>+/+</sup> _C57 | SIN.LV.SF.GFP | LIVER | 12 | 92477356  | - | NM_181815    | 4930534B04Rik | - |
| E-DMM57 | Cdkn2a <sup>+/+</sup> _C57 | SIN.LV.SF.GFP | LIVER | 12 | 92499241  | - | NM_181815    | 4930534B04Rik | - |
| E-DMM50 | Cdkn2a <sup>+/+</sup> _C57 | SIN.LV.SF.GFP | LIVER | 12 | 92577366  | - | NM_181815    | 4930534B04Rik | - |
| E-DMM58 | Cdkn2a <sup>+/+</sup> _C57 | SIN.LV.SF.GFP | LIVER | 12 | 92970819  | - | NM_175367    | Ston2         | - |
| E-DMM59 | Cdkn2a <sup>+/+</sup> _C57 | SIN.LV.SF.GFP | LIVER | 12 | 94545683  | - | NM_001039089 | Sell1         | - |
| E-DMM48 | Cdkn2a <sup>+/+</sup> _C57 | SIN.LV.SF.GFP | LIVER | 12 | 95182402  | + | NM_201518    | Flrt2         | + |
| E-DMM63 | Cdkn2a <sup>+/+</sup> _C57 | SIN.LV.SF.GFP | LIVER | 12 | 99099261  | - | NM_008079    | Galc          | - |
| E-DMM52 | Cdkn2a <sup>+/+</sup> _C57 | SIN.LV.SF.GFP | LIVER | 12 | 99470133  | + | NM_008079    | Galc          | - |
| E-DMM48 | Cdkn2a <sup>+/+</sup> _C57 | SIN.LV.SF.GFP | LIVER | 12 | 100220722 | - | NM_029553    | Ttc8          | + |
| E-DMM52 | Cdkn2a <sup>+/+</sup> _C57 | SIN.LV.SF.GFP | LIVER | 12 | 100734957 | + | NM_183186    | Foxn3         | - |
| E-DMM59 | Cdkn2a <sup>+/+</sup> _C57 | SIN.LV.SF.GFP | LIVER | 12 | 101605396 | - | NM_001033213 | Ttc7b         | - |
| E-DMM50 | Cdkn2a <sup>+/+</sup> _C57 | SIN.LV.SF.GFP | LIVER | 12 | 101924897 | + | NM_153587    | Rps6ka5       | - |
| E-DMM63 | Cdkn2a <sup>+/+</sup> _C57 | SIN.LV.SF.GFP | LIVER | 12 | 102920035 | + | NM_028924    | Tc2n          | - |
| E-DMM63 | Cdkn2a <sup>+/+</sup> _C57 | SIN.LV.SF.GFP | LIVER | 12 | 103992273 | + | NM_001142938 | LOC100233175  | - |
| E-DMM58 | Cdkn2a <sup>+/+</sup> _C57 | SIN.LV.SF.GFP | LIVER | 12 | 107892421 | + | NM_001029843 | Vrk1          | + |
| E-DMM55 | Cdkn2a <sup>+/+</sup> _C57 | SIN.LV.SF.GFP | LIVER | 12 | 112334090 | - | NM_198023    | Rcor1         | + |
| E-DMM63 | Cdkn2a <sup>+/+</sup> _C57 | SIN.LV.SF.GFP | LIVER | 12 | 112821769 | + | NM_021516    | Mark3         | + |
| E-DMM58 | Cdkn2a <sup>+/+</sup> _C57 | SIN.LV.SF.GFP | LIVER | 12 | 112833196 | - | NM_021516    | Mark3         | + |
| E-DMM58 | Cdkn2a <sup>+/+</sup> _C57 | SIN.LV.SF.GFP | LIVER | 12 | 112959963 | - | NM_026511    | 2810002N01Rik | + |
| E-DMM50 | Cdkn2a <sup>+/+</sup> _C57 | SIN.LV.SF.GFP | LIVER | 12 | 114267476 | + | NM_001081170 | Pacs2         | + |
| E-DMM63 | Cdkn2a <sup>+/+</sup> _C57 | SIN.LV.SF.GFP | LIVER | 12 | 117569509 | + | NM_028731    | Fam62b        | + |
| E-DMM49 | Cdkn2a <sup>+/+</sup> _C57 | SIN.LV.SF.GFP | LIVER | 12 | 118779415 | - | NM_175930    | Rapgef5       | + |
| E-DMM58 | Cdkn2a <sup>+/+</sup> _C57 | SIN.LV.SF.GFP | LIVER | 12 | 118813035 | + | NM_175930    | Rapgef5       | + |
| E-DMM63 | Cdkn2a <sup>+/+</sup> _C57 | SIN.LV.SF.GFP | LIVER | 12 | 119510739 | - | NM_009239    | Sp4           | - |
| E-DMM48 | Cdkn2a <sup>+/+</sup> _C57 | SIN.LV.SF.GFP | LIVER | 13 | 3550072   | + | NM_008112    | Gdi2          | + |
| E-DMM55 | Cdkn2a <sup>+/+</sup> _C57 | SIN.LV.SF.GFP | LIVER | 13 | 3577994   | - | NM_134063    | BC016423      | - |
| E-DMM52 | Cdkn2a <sup>+/+</sup> _C57 | SIN.LV.SF.GFP | LIVER | 13 | 3599542   | + | NM_134063    | BC016423      | - |

|         |                            |               |       |    |          |   |              |               |   |
|---------|----------------------------|---------------|-------|----|----------|---|--------------|---------------|---|
| E-DMM58 | Cdkn2a <sup>+/+</sup> _C57 | SIN.LV.SF.GFP | LIVER | 13 | 3606169  | + | NM_134063    | BC016423      | - |
| E-DMM63 | Cdkn2a <sup>+/+</sup> _C57 | SIN.LV.SF.GFP | LIVER | 13 | 3913049  | + | NM_019671    | Net1          | - |
| E-DMM52 | Cdkn2a <sup>+/+</sup> _C57 | SIN.LV.SF.GFP | LIVER | 13 | 4434845  | + | NM_030611    | Akr1c6        | + |
| E-DMM58 | Cdkn2a <sup>+/+</sup> _C57 | SIN.LV.SF.GFP | LIVER | 13 | 5560181  | + | NM_011803    | Klf6          | + |
| E-DMM58 | Cdkn2a <sup>+/+</sup> _C57 | SIN.LV.SF.GFP | LIVER | 13 | 5772332  | + | NM_011803    | Klf6          | + |
| E-DMM58 | Cdkn2a <sup>+/+</sup> _C57 | SIN.LV.SF.GFP | LIVER | 13 | 5808267  | - | NM_011803    | Klf6          | + |
| E-DMM50 | Cdkn2a <sup>+/+</sup> _C57 | SIN.LV.SF.GFP | LIVER | 13 | 6156721  | + | NM_011803    | Klf6          | + |
| E-DMM63 | Cdkn2a <sup>+/+</sup> _C57 | SIN.LV.SF.GFP | LIVER | 13 | 6875954  | - | NM_019703    | Pfkp          | - |
| E-DMM57 | Cdkn2a <sup>+/+</sup> _C57 | SIN.LV.SF.GFP | LIVER | 13 | 8853473  | + | NM_001039389 | Wdr37         | - |
| E-DMM48 | Cdkn2a <sup>+/+</sup> _C57 | SIN.LV.SF.GFP | LIVER | 13 | 9039808  | - | NM_027000    | Gtpbp4        | - |
| E-DMM52 | Cdkn2a <sup>+/+</sup> _C57 | SIN.LV.SF.GFP | LIVER | 13 | 9103530  | + | NM_172585    | Larp5         | + |
| E-DMM58 | Cdkn2a <sup>+/+</sup> _C57 | SIN.LV.SF.GFP | LIVER | 13 | 16263006 | + | NM_008380    | Inhba         | + |
| E-DMM58 | Cdkn2a <sup>+/+</sup> _C57 | SIN.LV.SF.GFP | LIVER | 13 | 16988774 | - | NM_138654    | 5033411D12Rik | - |
| E-DMM59 | Cdkn2a <sup>+/+</sup> _C57 | SIN.LV.SF.GFP | LIVER | 13 | 17041091 | - | NM_138654    | 5033411D12Rik | - |
| E-DMM52 | Cdkn2a <sup>+/+</sup> _C57 | SIN.LV.SF.GFP | LIVER | 13 | 19453250 | + | NM_024270    | Stard3nl      | - |
| E-DMM52 | Cdkn2a <sup>+/+</sup> _C57 | SIN.LV.SF.GFP | LIVER | 13 | 21277522 | - | NM_009054    | Trim27        | + |
| E-DMM50 | Cdkn2a <sup>+/+</sup> _C57 | SIN.LV.SF.GFP | LIVER | 13 | 21486975 | + | NM_001145778 | Zkscan3       | - |
| E-DMM50 | Cdkn2a <sup>+/+</sup> _C57 | SIN.LV.SF.GFP | LIVER | 13 | 21606199 | + | NM_139141    | Zfp192        | - |
| E-DMM52 | Cdkn2a <sup>+/+</sup> _C57 | SIN.LV.SF.GFP | LIVER | 13 | 21609025 | + | NM_139141    | Zfp192        | - |
| E-DMM50 | Cdkn2a <sup>+/+</sup> _C57 | SIN.LV.SF.GFP | LIVER | 13 | 21619460 | - | NM_139141    | Zfp192        | - |
| E-DMM50 | Cdkn2a <sup>+/+</sup> _C57 | SIN.LV.SF.GFP | LIVER | 13 | 21645653 | + | NM_207572    | Olfrl365      | - |
| E-DMM58 | Cdkn2a <sup>+/+</sup> _C57 | SIN.LV.SF.GFP | LIVER | 13 | 29445101 | + | NM_144536    | Cdkal1        | - |
| E-DMM47 | Cdkn2a <sup>+/+</sup> _C57 | SIN.LV.SF.GFP | LIVER | 13 | 30608604 | - | NM_025710    | Uqcrfsl       | - |
| E-DMM52 | Cdkn2a <sup>+/+</sup> _C57 | SIN.LV.SF.GFP | LIVER | 13 | 31036553 | - | NM_025588    | Exoc2         | - |
| E-DMM52 | Cdkn2a <sup>+/+</sup> _C57 | SIN.LV.SF.GFP | LIVER | 13 | 31283008 | - | NM_001013788 | Gm5447        | - |
| E-DMM59 | Cdkn2a <sup>+/+</sup> _C57 | SIN.LV.SF.GFP | LIVER | 13 | 31319980 | + | NM_001013788 | Gm5447        | - |
| E-DMM63 | Cdkn2a <sup>+/+</sup> _C57 | SIN.LV.SF.GFP | LIVER | 13 | 34365572 | - | NM_001033167 | Slc22a23      | - |
| E-DMM57 | Cdkn2a <sup>+/+</sup> _C57 | SIN.LV.SF.GFP | LIVER | 13 | 34766831 | - | NM_025831    | 1300014I06Rik | - |
| E-DMM58 | Cdkn2a <sup>+/+</sup> _C57 | SIN.LV.SF.GFP | LIVER | 13 | 34997777 | + | NM_013830    | Prpf4b        | + |
| E-DMM50 | Cdkn2a <sup>+/+</sup> _C57 | SIN.LV.SF.GFP | LIVER | 13 | 36528867 | - | NM_001039189 | Fars2         | + |
| E-DMM50 | Cdkn2a <sup>+/+</sup> _C57 | SIN.LV.SF.GFP | LIVER | 13 | 37200885 | + | NM_028784    | F13a1         | - |

|         |                            |               |       |    |          |   |              |               |   |
|---------|----------------------------|---------------|-------|----|----------|---|--------------|---------------|---|
| E-DMM63 | Cdkn2a <sup>+/+</sup> _C57 | SIN.LV.SF.GFP | LIVER | 13 | 41412011 | - | NM_001111324 | Nedd9         | - |
| E-DMM52 | Cdkn2a <sup>+/+</sup> _C57 | SIN.LV.SF.GFP | LIVER | 13 | 49069256 | - | NM_001033268 | Fam120a       | - |
| E-DMM50 | Cdkn2a <sup>+/+</sup> _C57 | SIN.LV.SF.GFP | LIVER | 13 | 54514902 | - | NM_009946    | Cplx2         | + |
| E-DMM65 | Cdkn2a <sup>+/+</sup> _C57 | SIN.LV.SF.GFP | LIVER | 13 | 60716408 | - | NM_134062    | Dapk1         | + |
| E-DMM52 | Cdkn2a <sup>+/+</sup> _C57 | SIN.LV.SF.GFP | LIVER | 13 | 60974570 | - | NM_178098    | 4930486L24Rik | - |
| E-DMM48 | Cdkn2a <sup>+/+</sup> _C57 | SIN.LV.SF.GFP | LIVER | 13 | 62984871 | - | NM_019395    | Fbp1          | - |
| E-DMM57 | Cdkn2a <sup>+/+</sup> _C57 | SIN.LV.SF.GFP | LIVER | 13 | 63970486 | + | NM_023507    | 0610007P08Rik | + |
| E-DMM58 | Cdkn2a <sup>+/+</sup> _C57 | SIN.LV.SF.GFP | LIVER | 13 | 64000314 | + | NM_001013608 | 0610007P08Rik | + |
| E-DMM57 | Cdkn2a <sup>+/+</sup> _C57 | SIN.LV.SF.GFP | LIVER | 13 | 65349766 | - | NM_178364    | Zfp369        | + |
| E-DMM50 | Cdkn2a <sup>+/+</sup> _C57 | SIN.LV.SF.GFP | LIVER | 13 | 65391530 | - | NM_178364    | Zfp369        | + |
| E-DMM49 | Cdkn2a <sup>+/+</sup> _C57 | SIN.LV.SF.GFP | LIVER | 13 | 67017225 | + | NM_025547    | Mterfd1       | - |
| E-DMM65 | Cdkn2a <sup>+/+</sup> _C57 | SIN.LV.SF.GFP | LIVER | 13 | 67043474 | + | NM_008959    | Ptdss1        | + |
| E-DMM50 | Cdkn2a <sup>+/+</sup> _C57 | SIN.LV.SF.GFP | LIVER | 13 | 69533474 | - | NM_198600    | Pols          | - |
| E-DMM65 | Cdkn2a <sup>+/+</sup> _C57 | SIN.LV.SF.GFP | LIVER | 13 | 70762368 | - | NM_172053    | Adamts16      | - |
| E-DMM65 | Cdkn2a <sup>+/+</sup> _C57 | SIN.LV.SF.GFP | LIVER | 13 | 70791549 | + | NM_172053    | Adamts16      | - |
| E-DMM52 | Cdkn2a <sup>+/+</sup> _C57 | SIN.LV.SF.GFP | LIVER | 13 | 75382283 | + | NM_013628    | Pcsk1         | + |
| E-DMM52 | Cdkn2a <sup>+/+</sup> _C57 | SIN.LV.SF.GFP | LIVER | 13 | 75573291 | - | NM_138953    | Ell2          | + |
| E-DMM50 | Cdkn2a <sup>+/+</sup> _C57 | SIN.LV.SF.GFP | LIVER | 13 | 77206410 | - | NM_134071    | Ankrd32       | - |
| E-DMM57 | Cdkn2a <sup>+/+</sup> _C57 | SIN.LV.SF.GFP | LIVER | 13 | 77265777 | - | NM_134071    | Ankrd32       | - |
| E-DMM50 | Cdkn2a <sup>+/+</sup> _C57 | SIN.LV.SF.GFP | LIVER | 13 | 77267589 | - | NM_134071    | Ankrd32       | - |
| E-DMM50 | Cdkn2a <sup>+/+</sup> _C57 | SIN.LV.SF.GFP | LIVER | 13 | 77269267 | + | NM_134071    | Ankrd32       | - |
| E-DMM59 | Cdkn2a <sup>+/+</sup> _C57 | SIN.LV.SF.GFP | LIVER | 13 | 78131376 | + | NM_010151    | Nr2f1         | - |
| E-DMM65 | Cdkn2a <sup>+/+</sup> _C57 | SIN.LV.SF.GFP | LIVER | 13 | 78153212 | - | NM_010151    | Nr2f1         | - |
| E-DMM63 | Cdkn2a <sup>+/+</sup> _C57 | SIN.LV.SF.GFP | LIVER | 13 | 79150355 | - | NM_010151    | Nr2f1         | - |
| E-DMM57 | Cdkn2a <sup>+/+</sup> _C57 | SIN.LV.SF.GFP | LIVER | 13 | 81349005 | - | NM_054053    | Gpr98         | - |
| E-DMM65 | Cdkn2a <sup>+/+</sup> _C57 | SIN.LV.SF.GFP | LIVER | 13 | 83070027 | + | NM_025282    | Mef2c         | + |
| E-DMM57 | Cdkn2a <sup>+/+</sup> _C57 | SIN.LV.SF.GFP | LIVER | 13 | 83728152 | - | NM_025282    | Mef2c         | + |
| E-DMM63 | Cdkn2a <sup>+/+</sup> _C57 | SIN.LV.SF.GFP | LIVER | 13 | 84383320 | + | NM_175187    | Tmem161b      | + |
| E-DMM50 | Cdkn2a <sup>+/+</sup> _C57 | SIN.LV.SF.GFP | LIVER | 13 | 85394115 | + | NM_145452    | Rasa1         | - |
| E-DMM57 | Cdkn2a <sup>+/+</sup> _C57 | SIN.LV.SF.GFP | LIVER | 13 | 85396716 | - | NM_145452    | Rasa1         | - |
| E-DMM63 | Cdkn2a <sup>+/+</sup> _C57 | SIN.LV.SF.GFP | LIVER | 13 | 85417581 | + | NM_145452    | Rasa1         | - |

|         |                            |               |       |    |           |   |              |          |   |
|---------|----------------------------|---------------|-------|----|-----------|---|--------------|----------|---|
| E-DMM49 | Cdkn2a <sup>+/+</sup> _C57 | SIN.LV.SF.GFP | LIVER | 13 | 89513904  | + | NM_001037987 | Edil3    | + |
| E-DMM63 | Cdkn2a <sup>+/+</sup> _C57 | SIN.LV.SF.GFP | LIVER | 13 | 90016598  | + | NM_028012    | Xrcc4    | - |
| E-DMM58 | Cdkn2a <sup>+/+</sup> _C57 | SIN.LV.SF.GFP | LIVER | 13 | 90127727  | - | NM_028012    | Xrcc4    | - |
| E-DMM52 | Cdkn2a <sup>+/+</sup> _C57 | SIN.LV.SF.GFP | LIVER | 13 | 90140437  | - | NM_028012    | Xrcc4    | - |
| E-DMM59 | Cdkn2a <sup>+/+</sup> _C57 | SIN.LV.SF.GFP | LIVER | 13 | 90532881  | - | NM_025335    | Tmem167  | + |
| E-DMM58 | Cdkn2a <sup>+/+</sup> _C57 | SIN.LV.SF.GFP | LIVER | 13 | 91179748  | - | NM_025770    | Atg10    | - |
| E-DMM58 | Cdkn2a <sup>+/+</sup> _C57 | SIN.LV.SF.GFP | LIVER | 13 | 92800205  | - | NM_009027    | Rasgrf2  | - |
| E-DMM57 | Cdkn2a <sup>+/+</sup> _C57 | SIN.LV.SF.GFP | LIVER | 13 | 95587175  | + | NM_009321    | Tbca     | + |
| E-DMM58 | Cdkn2a <sup>+/+</sup> _C57 | SIN.LV.SF.GFP | LIVER | 13 | 96140753  | - | NM_025630    | Aggf1    | - |
| E-DMM48 | Cdkn2a <sup>+/+</sup> _C57 | SIN.LV.SF.GFP | LIVER | 13 | 97292689  | - | NM_012048    | Polk     | - |
| E-DMM52 | Cdkn2a <sup>+/+</sup> _C57 | SIN.LV.SF.GFP | LIVER | 13 | 98305670  | + | NM_007930    | Enc1     | + |
| E-DMM58 | Cdkn2a <sup>+/+</sup> _C57 | SIN.LV.SF.GFP | LIVER | 13 | 99834001  | + | NM_001004149 | Zfp366   | + |
| E-DMM52 | Cdkn2a <sup>+/+</sup> _C57 | SIN.LV.SF.GFP | LIVER | 13 | 104649634 | - | NM_001005868 | Erb2ip   | - |
| E-DMM63 | Cdkn2a <sup>+/+</sup> _C57 | SIN.LV.SF.GFP | LIVER | 13 | 104670862 | - | NM_001005868 | Erb2ip   | - |
| E-DMM58 | Cdkn2a <sup>+/+</sup> _C57 | SIN.LV.SF.GFP | LIVER | 13 | 105038422 | + | NM_021790    | Cenpk    | + |
| E-DMM52 | Cdkn2a <sup>+/+</sup> _C57 | SIN.LV.SF.GFP | LIVER | 13 | 105503814 | - | NM_026072    | Sdccag10 | - |
| E-DMM58 | Cdkn2a <sup>+/+</sup> _C57 | SIN.LV.SF.GFP | LIVER | 13 | 105606288 | - | NM_026072    | Sdccag10 | - |
| E-DMM52 | Cdkn2a <sup>+/+</sup> _C57 | SIN.LV.SF.GFP | LIVER | 13 | 107756590 | + | NM_001145779 | Kif2a    | - |
| E-DMM55 | Cdkn2a <sup>+/+</sup> _C57 | SIN.LV.SF.GFP | LIVER | 13 | 107756830 | - | NM_001145779 | Kif2a    | - |
| E-DMM50 | Cdkn2a <sup>+/+</sup> _C57 | SIN.LV.SF.GFP | LIVER | 13 | 110224134 | + | NM_011056    | Pde4d    | + |
| E-DMM52 | Cdkn2a <sup>+/+</sup> _C57 | SIN.LV.SF.GFP | LIVER | 13 | 112814725 | - | NM_011945    | Map3k1   | - |
| E-DMM50 | Cdkn2a <sup>+/+</sup> _C57 | SIN.LV.SF.GFP | LIVER | 13 | 114224305 | + | NM_130796    | Snx18    | - |
| E-DMM48 | Cdkn2a <sup>+/+</sup> _C57 | SIN.LV.SF.GFP | LIVER | 13 | 114726564 | - | NM_172595    | Arl15    | + |
| E-DMM59 | Cdkn2a <sup>+/+</sup> _C57 | SIN.LV.SF.GFP | LIVER | 13 | 115690286 | - | NM_008396    | Itga2    | - |
| E-DMM58 | Cdkn2a <sup>+/+</sup> _C57 | SIN.LV.SF.GFP | LIVER | 13 | 115764894 | - | NM_001033228 | Itga1    | - |
| E-DMM59 | Cdkn2a <sup>+/+</sup> _C57 | SIN.LV.SF.GFP | LIVER | 13 | 117244907 | + | NM_021459    | Isl1     | - |
| E-DMM55 | Cdkn2a <sup>+/+</sup> _C57 | SIN.LV.SF.GFP | LIVER | 13 | 117424528 | + | NM_001081009 | Parp8    | - |
| E-DMM49 | Cdkn2a <sup>+/+</sup> _C57 | SIN.LV.SF.GFP | LIVER | 13 | 117772428 | + | NM_001081009 | Parp8    | - |
| E-DMM55 | Cdkn2a <sup>+/+</sup> _C57 | SIN.LV.SF.GFP | LIVER | 13 | 118242034 | - | NM_010408    | Hcn1     | + |
| E-DMM65 | Cdkn2a <sup>+/+</sup> _C57 | SIN.LV.SF.GFP | LIVER | 13 | 118683236 | + | NM_010408    | Hcn1     | + |
| E-DMM50 | Cdkn2a <sup>+/+</sup> _C57 | SIN.LV.SF.GFP | LIVER | 14 | 8881670   | + | NM_025341    | Abhd6    | + |

|         |                            |               |       |    |          |   |              |               |   |
|---------|----------------------------|---------------|-------|----|----------|---|--------------|---------------|---|
| E-DMM48 | Cdkn2a <sup>+/+</sup> _C57 | SIN.LV.SF.GFP | LIVER | 14 | 8964125  | + | NM_178279    | Pxk           | + |
| E-DMM63 | Cdkn2a <sup>+/+</sup> _C57 | SIN.LV.SF.GFP | LIVER | 14 | 10371654 | + | NM_010210    | Fhit          | - |
| E-DMM57 | Cdkn2a <sup>+/+</sup> _C57 | SIN.LV.SF.GFP | LIVER | 14 | 10809241 | + | NM_010210    | Fhit          | - |
| E-DMM49 | Cdkn2a <sup>+/+</sup> _C57 | SIN.LV.SF.GFP | LIVER | 14 | 11033202 | - | NM_010210    | Fhit          | - |
| E-DMM52 | Cdkn2a <sup>+/+</sup> _C57 | SIN.LV.SF.GFP | LIVER | 14 | 12840489 | + | NM_008981    | Ptprg         | + |
| E-DMM48 | Cdkn2a <sup>+/+</sup> _C57 | SIN.LV.SF.GFP | LIVER | 14 | 13154949 | + | NM_146051    | 3830406C13Rik | + |
| E-DMM58 | Cdkn2a <sup>+/+</sup> _C57 | SIN.LV.SF.GFP | LIVER | 14 | 17215371 | - | NM_009409    | Top2b         | + |
| E-DMM52 | Cdkn2a <sup>+/+</sup> _C57 | SIN.LV.SF.GFP | LIVER | 14 | 18763425 | - | NM_001113417 | Thrb          | + |
| E-DMM50 | Cdkn2a <sup>+/+</sup> _C57 | SIN.LV.SF.GFP | LIVER | 14 | 18793822 | + | NM_001113417 | Thrb          | + |
| E-DMM57 | Cdkn2a <sup>+/+</sup> _C57 | SIN.LV.SF.GFP | LIVER | 14 | 19400330 | + | NM_144839    | Ube2e2        | - |
| E-DMM50 | Cdkn2a <sup>+/+</sup> _C57 | SIN.LV.SF.GFP | LIVER | 14 | 19667296 | + | NM_144839    | Ube2e2        | - |
| E-DMM55 | Cdkn2a <sup>+/+</sup> _C57 | SIN.LV.SF.GFP | LIVER | 14 | 19741360 | - | NM_144839    | Ube2e2        | - |
| E-DMM57 | Cdkn2a <sup>+/+</sup> _C57 | SIN.LV.SF.GFP | LIVER | 14 | 21759379 | + | NM_009502    | Vcl           | + |
| E-DMM63 | Cdkn2a <sup>+/+</sup> _C57 | SIN.LV.SF.GFP | LIVER | 14 | 22038165 | + | NM_134079    | Adk           | + |
| E-DMM50 | Cdkn2a <sup>+/+</sup> _C57 | SIN.LV.SF.GFP | LIVER | 14 | 27233370 | + | NM_032008    | Slmap         | - |
| E-DMM55 | Cdkn2a <sup>+/+</sup> _C57 | SIN.LV.SF.GFP | LIVER | 14 | 27244791 | - | NM_032008    | Slmap         | - |
| E-DMM55 | Cdkn2a <sup>+/+</sup> _C57 | SIN.LV.SF.GFP | LIVER | 14 | 28142588 | + | NM_027871    | Arhgef3       | + |
| E-DMM50 | Cdkn2a <sup>+/+</sup> _C57 | SIN.LV.SF.GFP | LIVER | 14 | 28154611 | + | NM_027871    | Arhgef3       | + |
| E-DMM52 | Cdkn2a <sup>+/+</sup> _C57 | SIN.LV.SF.GFP | LIVER | 14 | 28268379 | - | NM_001114879 | D14Abb1e      | + |
| E-DMM52 | Cdkn2a <sup>+/+</sup> _C57 | SIN.LV.SF.GFP | LIVER | 14 | 31984326 | - | NM_022656    | Nisch         | - |
| E-DMM48 | Cdkn2a <sup>+/+</sup> _C57 | SIN.LV.SF.GFP | LIVER | 14 | 35259711 | + | NM_009758    | Bmpr1a        | - |
| E-DMM50 | Cdkn2a <sup>+/+</sup> _C57 | SIN.LV.SF.GFP | LIVER | 14 | 35295501 | - | NM_009758    | Bmpr1a        | - |
| E-DMM57 | Cdkn2a <sup>+/+</sup> _C57 | SIN.LV.SF.GFP | LIVER | 14 | 35527272 | - | NM_001004436 | Wapal         | + |
| E-DMM57 | Cdkn2a <sup>+/+</sup> _C57 | SIN.LV.SF.GFP | LIVER | 14 | 35535351 | + | NM_001004436 | Wapal         | + |
| E-DMM55 | Cdkn2a <sup>+/+</sup> _C57 | SIN.LV.SF.GFP | LIVER | 14 | 41493951 | + | NM_177816    | Sh2d4b        | - |
| E-DMM64 | Cdkn2a <sup>+/+</sup> _C57 | SIN.LV.SF.GFP | LIVER | 14 | 45769862 | + | NM_172597    | Txndc16       | - |
| E-DMM59 | Cdkn2a <sup>+/+</sup> _C57 | SIN.LV.SF.GFP | LIVER | 14 | 47228727 | - | NM_009919    | Cnih          | - |
| E-DMM57 | Cdkn2a <sup>+/+</sup> _C57 | SIN.LV.SF.GFP | LIVER | 14 | 47466317 | + | NM_026832    | Cgrrf1        | + |
| E-DMM52 | Cdkn2a <sup>+/+</sup> _C57 | SIN.LV.SF.GFP | LIVER | 14 | 47881240 | + | NM_172598    | Wdhd1         | - |
| E-DMM52 | Cdkn2a <sup>+/+</sup> _C57 | SIN.LV.SF.GFP | LIVER | 14 | 48278894 | + | NM_008477    | Ktn1          | + |
| E-DMM49 | Cdkn2a <sup>+/+</sup> _C57 | SIN.LV.SF.GFP | LIVER | 14 | 48898280 | - | NM_033602    | Peli2         | + |

|         |                            |               |       |    |          |   |              |               |   |
|---------|----------------------------|---------------|-------|----|----------|---|--------------|---------------|---|
| E-DMM57 | Cdkn2a <sup>+/+</sup> _C57 | SIN.LV.SF.GFP | LIVER | 14 | 49680809 | + | NM_207214    | Exoc5         | - |
| E-DMM52 | Cdkn2a <sup>+/+</sup> _C57 | SIN.LV.SF.GFP | LIVER | 14 | 52561367 | - | NM_001011687 | Rnase13       | - |
| E-DMM55 | Cdkn2a <sup>+/+</sup> _C57 | SIN.LV.SF.GFP | LIVER | 14 | 52895882 | + | NM_172601    | Rab2b         | - |
| E-DMM52 | Cdkn2a <sup>+/+</sup> _C57 | SIN.LV.SF.GFP | LIVER | 14 | 55022800 | - | NM_011405    | Slc7a7        | - |
| E-DMM63 | Cdkn2a <sup>+/+</sup> _C57 | SIN.LV.SF.GFP | LIVER | 14 | 56230773 | - | NM_001159417 | Irf9          | + |
| E-DMM58 | Cdkn2a <sup>+/+</sup> _C57 | SIN.LV.SF.GFP | LIVER | 14 | 65498826 | + | NM_177338    | Hmbox1        | - |
| E-DMM52 | Cdkn2a <sup>+/+</sup> _C57 | SIN.LV.SF.GFP | LIVER | 14 | 66438815 | - | NM_028039    | Esco2         | - |
| E-DMM58 | Cdkn2a <sup>+/+</sup> _C57 | SIN.LV.SF.GFP | LIVER | 14 | 68358293 | + | NM_001111028 | Kctd9         | + |
| E-DMM57 | Cdkn2a <sup>+/+</sup> _C57 | SIN.LV.SF.GFP | LIVER | 14 | 73466061 | + | NM_133720    | Cysltr2       | - |
| E-DMM57 | Cdkn2a <sup>+/+</sup> _C57 | SIN.LV.SF.GFP | LIVER | 14 | 73732386 | - | NM_009029    | Rb1           | - |
| E-DMM57 | Cdkn2a <sup>+/+</sup> _C57 | SIN.LV.SF.GFP | LIVER | 14 | 74352253 | + | NM_011506    | Sucla2        | + |
| E-DMM48 | Cdkn2a <sup>+/+</sup> _C57 | SIN.LV.SF.GFP | LIVER | 14 | 75212786 | - | NM_001033439 | Lrch1         | - |
| E-DMM52 | Cdkn2a <sup>+/+</sup> _C57 | SIN.LV.SF.GFP | LIVER | 14 | 75245508 | + | NM_001033439 | Lrch1         | - |
| E-DMM58 | Cdkn2a <sup>+/+</sup> _C57 | SIN.LV.SF.GFP | LIVER | 14 | 76174237 | + | NM_026232    | Slc25a30      | - |
| E-DMM50 | Cdkn2a <sup>+/+</sup> _C57 | SIN.LV.SF.GFP | LIVER | 14 | 77249210 | - | NM_172488    | 9030625A04Rik | - |
| E-DMM50 | Cdkn2a <sup>+/+</sup> _C57 | SIN.LV.SF.GFP | LIVER | 14 | 77469948 | + | NM_175369    | Ccdc122       | + |
| E-DMM52 | Cdkn2a <sup>+/+</sup> _C57 | SIN.LV.SF.GFP | LIVER | 14 | 78901268 | + | NM_001081336 | Dgkh          | - |
| E-DMM55 | Cdkn2a <sup>+/+</sup> _C57 | SIN.LV.SF.GFP | LIVER | 14 | 79949558 | - | NM_007920    | Elf1          | + |
| E-DMM59 | Cdkn2a <sup>+/+</sup> _C57 | SIN.LV.SF.GFP | LIVER | 14 | 79966885 | + | NM_007920    | Elf1          | + |
| E-DMM65 | Cdkn2a <sup>+/+</sup> _C57 | SIN.LV.SF.GFP | LIVER | 14 | 82313658 | - | NM_001030294 | Olfm4         | + |
| E-DMM65 | Cdkn2a <sup>+/+</sup> _C57 | SIN.LV.SF.GFP | LIVER | 14 | 82640094 | + | NM_001013753 | Pcdh17        | + |
| E-DMM57 | Cdkn2a <sup>+/+</sup> _C57 | SIN.LV.SF.GFP | LIVER | 14 | 83398636 | - | NM_001013753 | Pcdh17        | + |
| E-DMM50 | Cdkn2a <sup>+/+</sup> _C57 | SIN.LV.SF.GFP | LIVER | 14 | 85530402 | + | NM_001013753 | Pcdh17        | + |
| E-DMM65 | Cdkn2a <sup>+/+</sup> _C57 | SIN.LV.SF.GFP | LIVER | 14 | 87091124 | + | NM_019670    | Diap3         | - |
| E-DMM63 | Cdkn2a <sup>+/+</sup> _C57 | SIN.LV.SF.GFP | LIVER | 14 | 87301976 | + | NM_019670    | Diap3         | - |
| E-DMM52 | Cdkn2a <sup>+/+</sup> _C57 | SIN.LV.SF.GFP | LIVER | 14 | 87456442 | + | NM_019670    | Diap3         | - |
| E-DMM52 | Cdkn2a <sup>+/+</sup> _C57 | SIN.LV.SF.GFP | LIVER | 14 | 87510997 | - | NM_019670    | Diap3         | - |
| E-DMM59 | Cdkn2a <sup>+/+</sup> _C57 | SIN.LV.SF.GFP | LIVER | 14 | 87830041 | - | NM_172605    | Tdrd3         | + |
| E-DMM55 | Cdkn2a <sup>+/+</sup> _C57 | SIN.LV.SF.GFP | LIVER | 14 | 88880306 | + | NM_178685    | Pcdh20        | - |
| E-DMM52 | Cdkn2a <sup>+/+</sup> _C57 | SIN.LV.SF.GFP | LIVER | 14 | 90712861 | - | NR_002862    | Gm5088        | + |
| E-DMM57 | Cdkn2a <sup>+/+</sup> _C57 | SIN.LV.SF.GFP | LIVER | 14 | 93817025 | + | NM_001081377 | Pcdh9         | - |

|         |                            |               |       |    |           |   |              |         |   |
|---------|----------------------------|---------------|-------|----|-----------|---|--------------|---------|---|
| E-DMM55 | Cdkn2a <sup>+/+</sup> _C57 | SIN.LV.SF.GFP | LIVER | 14 | 100401265 | - | NM_010636    | Klf12   | - |
| E-DMM59 | Cdkn2a <sup>+/+</sup> _C57 | SIN.LV.SF.GFP | LIVER | 14 | 101953066 | + | NM_001081278 | Tbc1d4  | - |
| E-DMM63 | Cdkn2a <sup>+/+</sup> _C57 | SIN.LV.SF.GFP | LIVER | 14 | 102066318 | - | NM_016723    | Uchl3   | + |
| E-DMM55 | Cdkn2a <sup>+/+</sup> _C57 | SIN.LV.SF.GFP | LIVER | 14 | 102083554 | - | NM_016723    | Uchl3   | + |
| E-DMM59 | Cdkn2a <sup>+/+</sup> _C57 | SIN.LV.SF.GFP | LIVER | 14 | 102254229 | + | NM_201529    | Lmo7    | + |
| E-DMM47 | Cdkn2a <sup>+/+</sup> _C57 | SIN.LV.SF.GFP | LIVER | 14 | 102496985 | - | NM_201529    | Lmo7    | + |
| E-DMM57 | Cdkn2a <sup>+/+</sup> _C57 | SIN.LV.SF.GFP | LIVER | 14 | 103680283 | + | NM_207215    | Mycbp2  | - |
| E-DMM65 | Cdkn2a <sup>+/+</sup> _C57 | SIN.LV.SF.GFP | LIVER | 14 | 104307020 | - | NM_001136061 | Ednrb   | - |
| E-DMM57 | Cdkn2a <sup>+/+</sup> _C57 | SIN.LV.SF.GFP | LIVER | 14 | 104915614 | - | NM_026047    | Rnf219  | - |
| E-DMM59 | Cdkn2a <sup>+/+</sup> _C57 | SIN.LV.SF.GFP | LIVER | 14 | 105508524 | + | NM_134077    | Rbm26   | - |
| E-DMM65 | Cdkn2a <sup>+/+</sup> _C57 | SIN.LV.SF.GFP | LIVER | 14 | 105708005 | + | NM_029561    | Ndfip2  | + |
| E-DMM52 | Cdkn2a <sup>+/+</sup> _C57 | SIN.LV.SF.GFP | LIVER | 14 | 106763750 | + | NM_198601    | Trim52  | + |
| E-DMM52 | Cdkn2a <sup>+/+</sup> _C57 | SIN.LV.SF.GFP | LIVER | 14 | 107859952 | - | NM_198601    | Trim52  | + |
| E-DMM52 | Cdkn2a <sup>+/+</sup> _C57 | SIN.LV.SF.GFP | LIVER | 14 | 109581959 | + | NM_199065    | Slitrk1 | - |
| E-DMM59 | Cdkn2a <sup>+/+</sup> _C57 | SIN.LV.SF.GFP | LIVER | 14 | 110354015 | + | NM_175499    | Slitrk6 | - |
| E-DMM50 | Cdkn2a <sup>+/+</sup> _C57 | SIN.LV.SF.GFP | LIVER | 14 | 114563784 | - | NM_175500    | Gpc5    | + |
| E-DMM55 | Cdkn2a <sup>+/+</sup> _C57 | SIN.LV.SF.GFP | LIVER | 14 | 115376707 | - | NM_175500    | Gpc5    | + |
| E-DMM55 | Cdkn2a <sup>+/+</sup> _C57 | SIN.LV.SF.GFP | LIVER | 14 | 115806378 | - | NM_175500    | Gpc5    | + |
| E-DMM63 | Cdkn2a <sup>+/+</sup> _C57 | SIN.LV.SF.GFP | LIVER | 14 | 118518722 | + | NM_029578    | Tgds    | - |
| E-DMM65 | Cdkn2a <sup>+/+</sup> _C57 | SIN.LV.SF.GFP | LIVER | 14 | 118962798 | + | NM_001033336 | Abcc4   | - |
| E-DMM63 | Cdkn2a <sup>+/+</sup> _C57 | SIN.LV.SF.GFP | LIVER | 14 | 121712792 | - | NM_145465    | Stk24   | - |
| E-DMM63 | Cdkn2a <sup>+/+</sup> _C57 | SIN.LV.SF.GFP | LIVER | 14 | 122549237 | - | NM_080556    | Tm9sf2  | + |
| E-DMM52 | Cdkn2a <sup>+/+</sup> _C57 | SIN.LV.SF.GFP | LIVER | 14 | 123085271 | - | NM_144844    | Pcca    | + |
| E-DMM63 | Cdkn2a <sup>+/+</sup> _C57 | SIN.LV.SF.GFP | LIVER | 14 | 124963063 | + | NM_207667    | Fgf14   | - |
| E-DMM59 | Cdkn2a <sup>+/+</sup> _C57 | SIN.LV.SF.GFP | LIVER | 15 | 3327817   | + | NM_001048147 | Ghr     | - |
| E-DMM52 | Cdkn2a <sup>+/+</sup> _C57 | SIN.LV.SF.GFP | LIVER | 15 | 3448714   | - | NM_001048178 | Ghr     | - |
| E-DMM49 | Cdkn2a <sup>+/+</sup> _C57 | SIN.LV.SF.GFP | LIVER | 15 | 5060562   | - | NM_026069    | Rpl37   | + |
| E-DMM59 | Cdkn2a <sup>+/+</sup> _C57 | SIN.LV.SF.GFP | LIVER | 15 | 5158587   | - | NM_026213    | Ttc33   | + |
| E-DMM50 | Cdkn2a <sup>+/+</sup> _C57 | SIN.LV.SF.GFP | LIVER | 15 | 5431744   | - | NM_008965    | Ptger4  | - |
| E-DMM59 | Cdkn2a <sup>+/+</sup> _C57 | SIN.LV.SF.GFP | LIVER | 15 | 6402486   | + | NM_013485    | C9      | + |
| E-DMM48 | Cdkn2a <sup>+/+</sup> _C57 | SIN.LV.SF.GFP | LIVER | 15 | 7874208   | - | NM_001081402 | Wdr70   | - |

|         |                            |               |       |    |          |   |              |               |   |
|---------|----------------------------|---------------|-------|----|----------|---|--------------|---------------|---|
| E-DMM52 | Cdkn2a <sup>+/+</sup> _C57 | SIN.LV.SF.GFP | LIVER | 15 | 8307253  | + | NM_201232    | Nipbl         | - |
| E-DMM58 | Cdkn2a <sup>+/+</sup> _C57 | SIN.LV.SF.GFP | LIVER | 15 | 8375534  | - | NM_027707    | Nipbl         | - |
| E-DMM58 | Cdkn2a <sup>+/+</sup> _C57 | SIN.LV.SF.GFP | LIVER | 15 | 8377732  | - | NM_027707    | Nipbl         | - |
| E-DMM48 | Cdkn2a <sup>+/+</sup> _C57 | SIN.LV.SF.GFP | LIVER | 15 | 9529564  | - | NM_177123    | Spef2         | - |
| E-DMM55 | Cdkn2a <sup>+/+</sup> _C57 | SIN.LV.SF.GFP | LIVER | 15 | 10554506 | + | NM_030690    | Rai14         | - |
| E-DMM58 | Cdkn2a <sup>+/+</sup> _C57 | SIN.LV.SF.GFP | LIVER | 15 | 10577208 | - | NM_030690    | Rai14         | - |
| E-DMM52 | Cdkn2a <sup>+/+</sup> _C57 | SIN.LV.SF.GFP | LIVER | 15 | 12075595 | - | NM_011767    | Zfr           | + |
| E-DMM63 | Cdkn2a <sup>+/+</sup> _C57 | SIN.LV.SF.GFP | LIVER | 15 | 12742521 | + | NM_029998    | 6030458C11Rik | - |
| E-DMM58 | Cdkn2a <sup>+/+</sup> _C57 | SIN.LV.SF.GFP | LIVER | 15 | 13321288 | + | NM_007666    | Cdh6          | - |
| E-DMM52 | Cdkn2a <sup>+/+</sup> _C57 | SIN.LV.SF.GFP | LIVER | 15 | 16589932 | + | NM_009869    | Cdh9          | + |
| E-DMM57 | Cdkn2a <sup>+/+</sup> _C57 | SIN.LV.SF.GFP | LIVER | 15 | 18894065 | + | NM_009865    | Cdh10         | + |
| E-DMM57 | Cdkn2a <sup>+/+</sup> _C57 | SIN.LV.SF.GFP | LIVER | 15 | 19754068 | + | NM_009865    | Cdh10         | + |
| E-DMM58 | Cdkn2a <sup>+/+</sup> _C57 | SIN.LV.SF.GFP | LIVER | 15 | 22860646 | - | NM_001081299 | Cdh18         | + |
| E-DMM52 | Cdkn2a <sup>+/+</sup> _C57 | SIN.LV.SF.GFP | LIVER | 15 | 25312536 | - | NM_027395    | Baspl         | - |
| E-DMM58 | Cdkn2a <sup>+/+</sup> _C57 | SIN.LV.SF.GFP | LIVER | 15 | 25319635 | - | NM_027395    | Baspl         | - |
| E-DMM52 | Cdkn2a <sup>+/+</sup> _C57 | SIN.LV.SF.GFP | LIVER | 15 | 25887655 | + | NM_025459    | Fam134b       | + |
| E-DMM59 | Cdkn2a <sup>+/+</sup> _C57 | SIN.LV.SF.GFP | LIVER | 15 | 25948129 | + | NM_144523    | Zfp622        | + |
| E-DMM55 | Cdkn2a <sup>+/+</sup> _C57 | SIN.LV.SF.GFP | LIVER | 15 | 26297839 | + | NM_177597    | 11-Mar        | + |
| E-DMM63 | Cdkn2a <sup>+/+</sup> _C57 | SIN.LV.SF.GFP | LIVER | 15 | 27397896 | - | NM_020332    | Ank           | + |
| E-DMM57 | Cdkn2a <sup>+/+</sup> _C57 | SIN.LV.SF.GFP | LIVER | 15 | 27709135 | + | NM_001081302 | Trio          | - |
| E-DMM65 | Cdkn2a <sup>+/+</sup> _C57 | SIN.LV.SF.GFP | LIVER | 15 | 27829221 | - | NM_001081302 | Trio          | - |
| E-DMM52 | Cdkn2a <sup>+/+</sup> _C57 | SIN.LV.SF.GFP | LIVER | 15 | 27881187 | - | NM_001081302 | Trio          | - |
| E-DMM52 | Cdkn2a <sup>+/+</sup> _C57 | SIN.LV.SF.GFP | LIVER | 15 | 27936148 | - | NM_001081302 | Trio          | - |
| E-DMM57 | Cdkn2a <sup>+/+</sup> _C57 | SIN.LV.SF.GFP | LIVER | 15 | 28874596 | - | NM_133365    | Dnahc5        | + |
| E-DMM58 | Cdkn2a <sup>+/+</sup> _C57 | SIN.LV.SF.GFP | LIVER | 15 | 30313002 | - | NM_008729    | Ctnd2         | + |
| E-DMM50 | Cdkn2a <sup>+/+</sup> _C57 | SIN.LV.SF.GFP | LIVER | 15 | 30521884 | + | NM_008729    | Ctnd2         | + |
| E-DMM55 | Cdkn2a <sup>+/+</sup> _C57 | SIN.LV.SF.GFP | LIVER | 15 | 32273568 | - | NM_009154    | Sema5a        | + |
| E-DMM59 | Cdkn2a <sup>+/+</sup> _C57 | SIN.LV.SF.GFP | LIVER | 15 | 33018049 | - | NM_018755    | Pgcp          | + |
| E-DMM55 | Cdkn2a <sup>+/+</sup> _C57 | SIN.LV.SF.GFP | LIVER | 15 | 34429015 | + | NM_152894    | Pop1          | + |
| E-DMM52 | Cdkn2a <sup>+/+</sup> _C57 | SIN.LV.SF.GFP | LIVER | 15 | 38254144 | + | NM_013692    | Klf10         | - |
| E-DMM50 | Cdkn2a <sup>+/+</sup> _C57 | SIN.LV.SF.GFP | LIVER | 15 | 38438196 | - | NM_001102458 | Azin1         | - |



|         |                            |               |       |    |          |   |              |               |   |
|---------|----------------------------|---------------|-------|----|----------|---|--------------|---------------|---|
| E-DMM58 | Cdkn2a <sup>+/+</sup> _C57 | SIN.LV.SF.GFP | LIVER | 15 | 40308350 | + | NM_011766    | Zfpn2         | + |
| E-DMM52 | Cdkn2a <sup>+/+</sup> _C57 | SIN.LV.SF.GFP | LIVER | 15 | 40778174 | + | NM_011766    | Zfpn2         | + |
| E-DMM57 | Cdkn2a <sup>+/+</sup> _C57 | SIN.LV.SF.GFP | LIVER | 15 | 40786062 | - | NM_011766    | Zfpn2         | + |
| E-DMM59 | Cdkn2a <sup>+/+</sup> _C57 | SIN.LV.SF.GFP | LIVER | 15 | 41632904 | + | NM_001130163 | Oxr1          | + |
| E-DMM63 | Cdkn2a <sup>+/+</sup> _C57 | SIN.LV.SF.GFP | LIVER | 15 | 41682932 | - | NM_001130163 | Oxr1          | + |
| E-DMM52 | Cdkn2a <sup>+/+</sup> _C57 | SIN.LV.SF.GFP | LIVER | 15 | 42079278 | - | NM_009640    | Angpt1        | - |
| E-DMM57 | Cdkn2a <sup>+/+</sup> _C57 | SIN.LV.SF.GFP | LIVER | 15 | 43077288 | - | NM_008388    | Eif3e         | - |
| E-DMM48 | Cdkn2a <sup>+/+</sup> _C57 | SIN.LV.SF.GFP | LIVER | 15 | 43326955 | + | NM_025736    | Ttc35         | + |
| E-DMM52 | Cdkn2a <sup>+/+</sup> _C57 | SIN.LV.SF.GFP | LIVER | 15 | 44221088 | + | NM_001113554 | Nudcd1        | - |
| E-DMM59 | Cdkn2a <sup>+/+</sup> _C57 | SIN.LV.SF.GFP | LIVER | 15 | 44564746 | - | NM_178765    | 5730410E15Rik | - |
| E-DMM55 | Cdkn2a <sup>+/+</sup> _C57 | SIN.LV.SF.GFP | LIVER | 15 | 44567050 | + | NM_178765    | 5730410E15Rik | - |
| E-DMM59 | Cdkn2a <sup>+/+</sup> _C57 | SIN.LV.SF.GFP | LIVER | 15 | 50129404 | - | NM_032000    | Trps1         | - |
| E-DMM52 | Cdkn2a <sup>+/+</sup> _C57 | SIN.LV.SF.GFP | LIVER | 15 | 50224789 | - | NM_032000    | Trps1         | - |
| E-DMM64 | Cdkn2a <sup>+/+</sup> _C57 | SIN.LV.SF.GFP | LIVER | 15 | 50228728 | + | NM_032000    | Trps1         | - |
| E-DMM52 | Cdkn2a <sup>+/+</sup> _C57 | SIN.LV.SF.GFP | LIVER | 15 | 50479365 | + | NM_032000    | Trps1         | - |
| E-DMM59 | Cdkn2a <sup>+/+</sup> _C57 | SIN.LV.SF.GFP | LIVER | 15 | 50564265 | + | NM_032000    | Trps1         | - |
| E-DMM57 | Cdkn2a <sup>+/+</sup> _C57 | SIN.LV.SF.GFP | LIVER | 15 | 50603275 | - | NM_032000    | Trps1         | - |
| E-DMM52 | Cdkn2a <sup>+/+</sup> _C57 | SIN.LV.SF.GFP | LIVER | 15 | 50639634 | + | NM_032000    | Trps1         | - |
| E-DMM58 | Cdkn2a <sup>+/+</sup> _C57 | SIN.LV.SF.GFP | LIVER | 15 | 50645900 | + | NM_032000    | Trps1         | - |
| E-DMM58 | Cdkn2a <sup>+/+</sup> _C57 | SIN.LV.SF.GFP | LIVER | 15 | 50651344 | + | NM_032000    | Trps1         | - |
| E-DMM58 | Cdkn2a <sup>+/+</sup> _C57 | SIN.LV.SF.GFP | LIVER | 15 | 50692577 | - | NM_032000    | Trps1         | - |
| E-DMM58 | Cdkn2a <sup>+/+</sup> _C57 | SIN.LV.SF.GFP | LIVER | 15 | 51626788 | + | NM_080635    | Eif3h         | - |
| E-DMM59 | Cdkn2a <sup>+/+</sup> _C57 | SIN.LV.SF.GFP | LIVER | 15 | 51941769 | - | NM_175503    | Aard          | + |
| E-DMM48 | Cdkn2a <sup>+/+</sup> _C57 | SIN.LV.SF.GFP | LIVER | 15 | 52556865 | - | NM_027212    | Med30         | + |
| E-DMM65 | Cdkn2a <sup>+/+</sup> _C57 | SIN.LV.SF.GFP | LIVER | 15 | 52931105 | + | NM_010162    | Ext1          | - |
| E-DMM48 | Cdkn2a <sup>+/+</sup> _C57 | SIN.LV.SF.GFP | LIVER | 15 | 53141447 | + | NM_010162    | Ext1          | - |
| E-DMM47 | Cdkn2a <sup>+/+</sup> _C57 | SIN.LV.SF.GFP | LIVER | 15 | 54702032 | - | NM_001136077 | Enpp2         | - |
| E-DMM63 | Cdkn2a <sup>+/+</sup> _C57 | SIN.LV.SF.GFP | LIVER | 15 | 57950913 | + | NM_027435    | Atad2         | - |
| E-DMM57 | Cdkn2a <sup>+/+</sup> _C57 | SIN.LV.SF.GFP | LIVER | 15 | 59322926 | - | NM_026746    | Nsmce2        | + |
| E-DMM52 | Cdkn2a <sup>+/+</sup> _C57 | SIN.LV.SF.GFP | LIVER | 15 | 62946039 | - | NM_031378    | Gsdmc         | - |
| E-DMM52 | Cdkn2a <sup>+/+</sup> _C57 | SIN.LV.SF.GFP | LIVER | 15 | 63783272 | - | NM_144846    | Fam49b        | - |

|         |                            |               |       |    |           |   |              |               |   |
|---------|----------------------------|---------------|-------|----|-----------|---|--------------|---------------|---|
| E-DMM47 | Cdkn2a <sup>+/+</sup> _C57 | SIN.LV.SF.GFP | LIVER | 15 | 63810291  | - | NM_144846    | Fam49b        | - |
| E-DMM55 | Cdkn2a <sup>+/+</sup> _C57 | SIN.LV.SF.GFP | LIVER | 15 | 66419018  | + | NM_001081409 | Phf2011       | + |
| E-DMM52 | Cdkn2a <sup>+/+</sup> _C57 | SIN.LV.SF.GFP | LIVER | 15 | 66471884  | - | NM_001081409 | Phf2011       | + |
| E-DMM50 | Cdkn2a <sup>+/+</sup> _C57 | SIN.LV.SF.GFP | LIVER | 15 | 68827567  | - | NM_010158    | Khdrbs3       | + |
| E-DMM58 | Cdkn2a <sup>+/+</sup> _C57 | SIN.LV.SF.GFP | LIVER | 15 | 68846757  | + | NM_010158    | Khdrbs3       | + |
| E-DMM48 | Cdkn2a <sup>+/+</sup> _C57 | SIN.LV.SF.GFP | LIVER | 15 | 68890348  | - | NM_010158    | Khdrbs3       | + |
| E-DMM63 | Cdkn2a <sup>+/+</sup> _C57 | SIN.LV.SF.GFP | LIVER | 15 | 69189617  | + | NM_010158    | Khdrbs3       | + |
| E-DMM55 | Cdkn2a <sup>+/+</sup> _C57 | SIN.LV.SF.GFP | LIVER | 15 | 76428425  | - | NM_053193    | Cpsf1         | - |
| E-DMM50 | Cdkn2a <sup>+/+</sup> _C57 | SIN.LV.SF.GFP | LIVER | 15 | 79362470  | - | NM_152806    | Ddx17         | - |
| E-DMM52 | Cdkn2a <sup>+/+</sup> _C57 | SIN.LV.SF.GFP | LIVER | 15 | 82655035  | + | NM_001114140 | Tcf20         | - |
| E-DMM52 | Cdkn2a <sup>+/+</sup> _C57 | SIN.LV.SF.GFP | LIVER | 15 | 82663088  | - | NM_001114140 | Tcf20         | - |
| E-DMM58 | Cdkn2a <sup>+/+</sup> _C57 | SIN.LV.SF.GFP | LIVER | 15 | 83278931  | - | NM_001159509 | Pacsin2       | - |
| E-DMM50 | Cdkn2a <sup>+/+</sup> _C57 | SIN.LV.SF.GFP | LIVER | 15 | 90170414  | + | NM_001033441 | Alg10b        | + |
| E-DMM58 | Cdkn2a <sup>+/+</sup> _C57 | SIN.LV.SF.GFP | LIVER | 15 | 90254360  | - | NM_025815    | Cpne8         | - |
| E-DMM52 | Cdkn2a <sup>+/+</sup> _C57 | SIN.LV.SF.GFP | LIVER | 15 | 90854752  | - | NM_001109040 | Kif21a        | - |
| E-DMM57 | Cdkn2a <sup>+/+</sup> _C57 | SIN.LV.SF.GFP | LIVER | 15 | 90977422  | + | NM_011994    | Abcd2         | - |
| E-DMM58 | Cdkn2a <sup>+/+</sup> _C57 | SIN.LV.SF.GFP | LIVER | 15 | 90989146  | - | NM_011994    | Abcd2         | - |
| E-DMM58 | Cdkn2a <sup>+/+</sup> _C57 | SIN.LV.SF.GFP | LIVER | 15 | 90989318  | - | NM_011994    | Abcd2         | - |
| E-DMM57 | Cdkn2a <sup>+/+</sup> _C57 | SIN.LV.SF.GFP | LIVER | 15 | 96112886  | + | NM_175251    | Arid2         | + |
| E-DMM55 | Cdkn2a <sup>+/+</sup> _C57 | SIN.LV.SF.GFP | LIVER | 15 | 96273463  | - | NM_028148    | Sfrs2ip       | - |
| E-DMM65 | Cdkn2a <sup>+/+</sup> _C57 | SIN.LV.SF.GFP | LIVER | 15 | 96451428  | + | NM_134086    | Slc38a1       | - |
| E-DMM52 | Cdkn2a <sup>+/+</sup> _C57 | SIN.LV.SF.GFP | LIVER | 15 | 96455438  | + | NM_134086    | Slc38a1       | - |
| E-DMM58 | Cdkn2a <sup>+/+</sup> _C57 | SIN.LV.SF.GFP | LIVER | 15 | 98377091  | + | NM_009833    | Ccnt1         | - |
| E-DMM52 | Cdkn2a <sup>+/+</sup> _C57 | SIN.LV.SF.GFP | LIVER | 15 | 99547033  | - | NM_010271    | Gpd1          | + |
| E-DMM63 | Cdkn2a <sup>+/+</sup> _C57 | SIN.LV.SF.GFP | LIVER | 15 | 99817712  | + | NM_001024526 | Larp4         | + |
| E-DMM52 | Cdkn2a <sup>+/+</sup> _C57 | SIN.LV.SF.GFP | LIVER | 15 | 102484813 | - | NM_026468    | Atp5g2        | - |
| E-DMM58 | Cdkn2a <sup>+/+</sup> _C57 | SIN.LV.SF.GFP | LIVER | 16 | 3748520   | + | NM_148924    | Zfp263        | + |
| E-DMM48 | Cdkn2a <sup>+/+</sup> _C57 | SIN.LV.SF.GFP | LIVER | 16 | 3845141   | - | NM_001081217 | Zfp174        | + |
| E-DMM52 | Cdkn2a <sup>+/+</sup> _C57 | SIN.LV.SF.GFP | LIVER | 16 | 4737040   | + | NM_001136066 | Hmox2         | + |
| E-DMM57 | Cdkn2a <sup>+/+</sup> _C57 | SIN.LV.SF.GFP | LIVER | 16 | 7928148   | + | NM_029070    | Tmem114       | - |
| E-DMM48 | Cdkn2a <sup>+/+</sup> _C57 | SIN.LV.SF.GFP | LIVER | 16 | 8835477   | - | NM_001081400 | 1810013L24Rik | + |

|         |                            |               |       |    |          |   |              |               |   |
|---------|----------------------------|---------------|-------|----|----------|---|--------------|---------------|---|
| E-DMM65 | Cdkn2a <sup>+/+</sup> _C57 | SIN.LV.SF.GFP | LIVER | 16 | 8910131  | - | NM_001081400 | 1810013L24Rik | + |
| E-DMM58 | Cdkn2a <sup>+/+</sup> _C57 | SIN.LV.SF.GFP | LIVER | 16 | 13871483 | + | NM_001039533 | Pdxcd1        | - |
| E-DMM57 | Cdkn2a <sup>+/+</sup> _C57 | SIN.LV.SF.GFP | LIVER | 16 | 13894391 | - | NM_001039533 | Pdxcd1        | - |
| E-DMM59 | Cdkn2a <sup>+/+</sup> _C57 | SIN.LV.SF.GFP | LIVER | 16 | 14947467 | + | NM_025769    | Efcab1        | + |
| E-DMM50 | Cdkn2a <sup>+/+</sup> _C57 | SIN.LV.SF.GFP | LIVER | 16 | 15830852 | - | NM_011159    | Prkdc         | + |
| E-DMM59 | Cdkn2a <sup>+/+</sup> _C57 | SIN.LV.SF.GFP | LIVER | 16 | 15857786 | + | NM_029354    | Fam128b       | - |
| E-DMM55 | Cdkn2a <sup>+/+</sup> _C57 | SIN.LV.SF.GFP | LIVER | 16 | 15959365 | + | NM_146068    | 2310008H04Rik | - |
| E-DMM55 | Cdkn2a <sup>+/+</sup> _C57 | SIN.LV.SF.GFP | LIVER | 16 | 16515050 | + | NM_139232    | Fgd4          | - |
| E-DMM59 | Cdkn2a <sup>+/+</sup> _C57 | SIN.LV.SF.GFP | LIVER | 16 | 16552142 | - | NM_139232    | Fgd4          | - |
| E-DMM50 | Cdkn2a <sup>+/+</sup> _C57 | SIN.LV.SF.GFP | LIVER | 16 | 17477545 | + | NM_007764    | Crkl          | + |
| E-DMM65 | Cdkn2a <sup>+/+</sup> _C57 | SIN.LV.SF.GFP | LIVER | 16 | 19955218 | - | NM_183390    | Klhl6         | - |
| E-DMM52 | Cdkn2a <sup>+/+</sup> _C57 | SIN.LV.SF.GFP | LIVER | 16 | 22258019 | + | NM_009186    | Tra2b         | - |
| E-DMM50 | Cdkn2a <sup>+/+</sup> _C57 | SIN.LV.SF.GFP | LIVER | 16 | 22967801 | - | NM_053176    | Hrg           | + |
| E-DMM50 | Cdkn2a <sup>+/+</sup> _C57 | SIN.LV.SF.GFP | LIVER | 16 | 23113006 | + | NM_001123037 | Eif4a2        | + |
| E-DMM48 | Cdkn2a <sup>+/+</sup> _C57 | SIN.LV.SF.GFP | LIVER | 16 | 24926393 | + | NM_001145952 | Lpp           | + |
| E-DMM57 | Cdkn2a <sup>+/+</sup> _C57 | SIN.LV.SF.GFP | LIVER | 16 | 26634232 | - | NM_001159317 | Il1rap        | + |
| E-DMM52 | Cdkn2a <sup>+/+</sup> _C57 | SIN.LV.SF.GFP | LIVER | 16 | 26752419 | - | NM_001159317 | Il1rap        | + |
| E-DMM57 | Cdkn2a <sup>+/+</sup> _C57 | SIN.LV.SF.GFP | LIVER | 16 | 26851761 | - | NM_001013761 | Gm606         | - |
| E-DMM49 | Cdkn2a <sup>+/+</sup> _C57 | SIN.LV.SF.GFP | LIVER | 16 | 27153940 | - | NM_198112    | Ostn          | + |
| E-DMM63 | Cdkn2a <sup>+/+</sup> _C57 | SIN.LV.SF.GFP | LIVER | 16 | 27365416 | - | NM_198166    | Uts2d         | - |
| E-DMM57 | Cdkn2a <sup>+/+</sup> _C57 | SIN.LV.SF.GFP | LIVER | 16 | 27444214 | - | NM_001025615 | Ccdc50        | + |
| E-DMM59 | Cdkn2a <sup>+/+</sup> _C57 | SIN.LV.SF.GFP | LIVER | 16 | 29005968 | + | NM_177718    | 1600021P15Rik | - |
| E-DMM58 | Cdkn2a <sup>+/+</sup> _C57 | SIN.LV.SF.GFP | LIVER | 16 | 29770213 | - | NM_133752    | Opa1          | + |
| E-DMM50 | Cdkn2a <sup>+/+</sup> _C57 | SIN.LV.SF.GFP | LIVER | 16 | 29952842 | + | NM_001033403 | Gm1968        | - |
| E-DMM63 | Cdkn2a <sup>+/+</sup> _C57 | SIN.LV.SF.GFP | LIVER | 16 | 31846969 | + | NM_007862    | Dlg1          | + |
| E-DMM50 | Cdkn2a <sup>+/+</sup> _C57 | SIN.LV.SF.GFP | LIVER | 16 | 35030167 | - | NM_023587    | Ptplb         | + |
| E-DMM65 | Cdkn2a <sup>+/+</sup> _C57 | SIN.LV.SF.GFP | LIVER | 16 | 35193627 | - | NM_001012765 | Adcy5         | + |
| E-DMM57 | Cdkn2a <sup>+/+</sup> _C57 | SIN.LV.SF.GFP | LIVER | 16 | 35476302 | - | NM_028295    | Pdia5         | - |
| E-DMM52 | Cdkn2a <sup>+/+</sup> _C57 | SIN.LV.SF.GFP | LIVER | 16 | 38141977 | + | NM_019827    | Gsk3b         | + |
| E-DMM58 | Cdkn2a <sup>+/+</sup> _C57 | SIN.LV.SF.GFP | LIVER | 16 | 38447878 | - | NM_007414    | Adprh         | - |
| E-DMM50 | Cdkn2a <sup>+/+</sup> _C57 | SIN.LV.SF.GFP | LIVER | 16 | 42865091 | - | NR_002445    | BC002163      | + |

|         |                            |               |       |    |          |   |              |               |   |
|---------|----------------------------|---------------|-------|----|----------|---|--------------|---------------|---|
| E-DMM52 | Cdkn2a <sup>+/+</sup> _C57 | SIN.LV.SF.GFP | LIVER | 16 | 43089707 | + | NR_002445    | BC002163      | + |
| E-DMM52 | Cdkn2a <sup>+/+</sup> _C57 | SIN.LV.SF.GFP | LIVER | 16 | 43207029 | - | NR_002445    | BC002163      | + |
| E-DMM57 | Cdkn2a <sup>+/+</sup> _C57 | SIN.LV.SF.GFP | LIVER | 16 | 43326978 | + | NM_019778    | Zbtb20        | + |
| E-DMM50 | Cdkn2a <sup>+/+</sup> _C57 | SIN.LV.SF.GFP | LIVER | 16 | 44425200 | - | NM_144550    | Ccdc52        | + |
| E-DMM57 | Cdkn2a <sup>+/+</sup> _C57 | SIN.LV.SF.GFP | LIVER | 16 | 44776548 | - | NM_021325    | Cd200r1       | + |
| E-DMM52 | Cdkn2a <sup>+/+</sup> _C57 | SIN.LV.SF.GFP | LIVER | 16 | 45173804 | - | NM_026402    | Atg3          | + |
| E-DMM63 | Cdkn2a <sup>+/+</sup> _C57 | SIN.LV.SF.GFP | LIVER | 16 | 46813842 | - | NM_021495    | Pvrl3         | - |
| E-DMM50 | Cdkn2a <sup>+/+</sup> _C57 | SIN.LV.SF.GFP | LIVER | 16 | 47243083 | - | NM_021495    | Pvrl3         | - |
| E-DMM58 | Cdkn2a <sup>+/+</sup> _C57 | SIN.LV.SF.GFP | LIVER | 16 | 47259087 | - | NM_021495    | Pvrl3         | - |
| E-DMM48 | Cdkn2a <sup>+/+</sup> _C57 | SIN.LV.SF.GFP | LIVER | 16 | 47399455 | - | NM_001018002 | Dppa4         | + |
| E-DMM58 | Cdkn2a <sup>+/+</sup> _C57 | SIN.LV.SF.GFP | LIVER | 16 | 49705526 | + | NM_028680    | Ifit57        | + |
| E-DMM55 | Cdkn2a <sup>+/+</sup> _C57 | SIN.LV.SF.GFP | LIVER | 16 | 49927432 | + | NM_010581    | Cd47          | + |
| E-DMM55 | Cdkn2a <sup>+/+</sup> _C57 | SIN.LV.SF.GFP | LIVER | 16 | 50370977 | - | NM_027444    | Bbx           | - |
| E-DMM52 | Cdkn2a <sup>+/+</sup> _C57 | SIN.LV.SF.GFP | LIVER | 16 | 52251402 | + | NM_009655    | Alcam         | - |
| E-DMM47 | Cdkn2a <sup>+/+</sup> _C57 | SIN.LV.SF.GFP | LIVER | 16 | 52422749 | + | NM_009655    | Alcam         | - |
| E-DMM63 | Cdkn2a <sup>+/+</sup> _C57 | SIN.LV.SF.GFP | LIVER | 16 | 55781103 | - | NM_001159394 | Nfkbiz        | - |
| E-DMM63 | Cdkn2a <sup>+/+</sup> _C57 | SIN.LV.SF.GFP | LIVER | 16 | 56014894 | - | NM_001024622 | Pcnp          | - |
| E-DMM52 | Cdkn2a <sup>+/+</sup> _C57 | SIN.LV.SF.GFP | LIVER | 16 | 56194217 | + | NM_001003971 | Senp7         | + |
| E-DMM63 | Cdkn2a <sup>+/+</sup> _C57 | SIN.LV.SF.GFP | LIVER | 16 | 56223481 | - | NM_174876    | Impg2         | + |
| E-DMM57 | Cdkn2a <sup>+/+</sup> _C57 | SIN.LV.SF.GFP | LIVER | 16 | 56694308 | - | NM_019678    | Tfg           | - |
| E-DMM52 | Cdkn2a <sup>+/+</sup> _C57 | SIN.LV.SF.GFP | LIVER | 16 | 57366454 | + | NM_030163    | Filip11       | + |
| E-DMM58 | Cdkn2a <sup>+/+</sup> _C57 | SIN.LV.SF.GFP | LIVER | 16 | 59538902 | - | NM_174848    | Crybg3        | - |
| E-DMM52 | Cdkn2a <sup>+/+</sup> _C57 | SIN.LV.SF.GFP | LIVER | 16 | 59543592 | + | NM_174848    | Crybg3        | - |
| E-DMM55 | Cdkn2a <sup>+/+</sup> _C57 | SIN.LV.SF.GFP | LIVER | 16 | 59597920 | - | NM_019665    | Arl6          | - |
| E-DMM59 | Cdkn2a <sup>+/+</sup> _C57 | SIN.LV.SF.GFP | LIVER | 16 | 62888386 | - | NM_011173    | Pros1         | + |
| E-DMM55 | Cdkn2a <sup>+/+</sup> _C57 | SIN.LV.SF.GFP | LIVER | 16 | 63862445 | + | NM_010140    | Epha3         | - |
| E-DMM50 | Cdkn2a <sup>+/+</sup> _C57 | SIN.LV.SF.GFP | LIVER | 16 | 64765348 | - | NM_026273    | 4930453N24Rik | - |
| E-DMM55 | Cdkn2a <sup>+/+</sup> _C57 | SIN.LV.SF.GFP | LIVER | 16 | 65187090 | + | NM_008310    | Htr1f         | - |
| E-DMM52 | Cdkn2a <sup>+/+</sup> _C57 | SIN.LV.SF.GFP | LIVER | 16 | 65681257 | - | NM_026879    | Chmp2b        | - |
| E-DMM48 | Cdkn2a <sup>+/+</sup> _C57 | SIN.LV.SF.GFP | LIVER | 16 | 68835236 | + | NM_173069    | Speer2        | - |
| E-DMM59 | Cdkn2a <sup>+/+</sup> _C57 | SIN.LV.SF.GFP | LIVER | 16 | 70231759 | - | NM_028803    | Gbe1          | + |

|         |                            |               |       |    |          |   |              |            |   |
|---------|----------------------------|---------------|-------|----|----------|---|--------------|------------|---|
| E-DMM47 | Cdkn2a <sup>+/+</sup> _C57 | SIN.LV.SF.GFP | LIVER | 16 | 70515168 | - | NM_028803    | Gbe1       | + |
| E-DMM52 | Cdkn2a <sup>+/+</sup> _C57 | SIN.LV.SF.GFP | LIVER | 16 | 70792633 | - | NM_028803    | Gbe1       | + |
| E-DMM50 | Cdkn2a <sup>+/+</sup> _C57 | SIN.LV.SF.GFP | LIVER | 16 | 72320224 | - | NM_019413    | Robo1      | + |
| E-DMM48 | Cdkn2a <sup>+/+</sup> _C57 | SIN.LV.SF.GFP | LIVER | 16 | 72764399 | - | NM_019413    | Robo1      | + |
| E-DMM58 | Cdkn2a <sup>+/+</sup> _C57 | SIN.LV.SF.GFP | LIVER | 16 | 72943820 | - | NM_019413    | Robo1      | + |
| E-DMM48 | Cdkn2a <sup>+/+</sup> _C57 | SIN.LV.SF.GFP | LIVER | 16 | 73395606 | + | NM_019413    | Robo1      | + |
| E-DMM52 | Cdkn2a <sup>+/+</sup> _C57 | SIN.LV.SF.GFP | LIVER | 16 | 74017520 | + | NM_175549    | Robo2      | - |
| E-DMM52 | Cdkn2a <sup>+/+</sup> _C57 | SIN.LV.SF.GFP | LIVER | 16 | 74693774 | - | NM_175549    | Robo2      | - |
| E-DMM52 | Cdkn2a <sup>+/+</sup> _C57 | SIN.LV.SF.GFP | LIVER | 16 | 74807365 | - | NM_175549    | Robo2      | - |
| E-DMM58 | Cdkn2a <sup>+/+</sup> _C57 | SIN.LV.SF.GFP | LIVER | 16 | 75830230 | + | NM_023380    | Samsn1     | - |
| E-DMM50 | Cdkn2a <sup>+/+</sup> _C57 | SIN.LV.SF.GFP | LIVER | 16 | 76229514 | + | NM_173440    | Nrip1      | - |
| E-DMM52 | Cdkn2a <sup>+/+</sup> _C57 | SIN.LV.SF.GFP | LIVER | 16 | 77057323 | + | NM_013918    | Usp25      | + |
| E-DMM59 | Cdkn2a <sup>+/+</sup> _C57 | SIN.LV.SF.GFP | LIVER | 16 | 77066392 | + | NM_013918    | Usp25      | + |
| E-DMM58 | Cdkn2a <sup>+/+</sup> _C57 | SIN.LV.SF.GFP | LIVER | 16 | 77076824 | + | NM_013918    | Usp25      | + |
| E-DMM58 | Cdkn2a <sup>+/+</sup> _C57 | SIN.LV.SF.GFP | LIVER | 16 | 77078445 | - | NM_013918    | Usp25      | + |
| E-DMM63 | Cdkn2a <sup>+/+</sup> _C57 | SIN.LV.SF.GFP | LIVER | 16 | 77289440 | + | NM_013918    | Usp25      | + |
| E-DMM52 | Cdkn2a <sup>+/+</sup> _C57 | SIN.LV.SF.GFP | LIVER | 16 | 77360581 | - | NM_013918    | Usp25      | + |
| E-DMM65 | Cdkn2a <sup>+/+</sup> _C57 | SIN.LV.SF.GFP | LIVER | 16 | 77553028 | - | NM_013918    | Usp25      | + |
| E-DMM63 | Cdkn2a <sup>+/+</sup> _C57 | SIN.LV.SF.GFP | LIVER | 16 | 77681207 | + | NM_013918    | Usp25      | + |
| E-DMM50 | Cdkn2a <sup>+/+</sup> _C57 | SIN.LV.SF.GFP | LIVER | 16 | 77686786 | + | NM_013918    | Usp25      | + |
| E-DMM52 | Cdkn2a <sup>+/+</sup> _C57 | SIN.LV.SF.GFP | LIVER | 16 | 77697113 | - | NM_013918    | Usp25      | + |
| E-DMM63 | Cdkn2a <sup>+/+</sup> _C57 | SIN.LV.SF.GFP | LIVER | 16 | 78212434 | + | NM_001025192 | Cxadr      | + |
| E-DMM59 | Cdkn2a <sup>+/+</sup> _C57 | SIN.LV.SF.GFP | LIVER | 16 | 78605448 | - | NM_025967    | D16Erd472e | - |
| E-DMM48 | Cdkn2a <sup>+/+</sup> _C57 | SIN.LV.SF.GFP | LIVER | 16 | 79062622 | + | NM_008941    | Prss7      | - |
| E-DMM58 | Cdkn2a <sup>+/+</sup> _C57 | SIN.LV.SF.GFP | LIVER | 16 | 80577094 | + | NM_001113208 | Ncam2      | + |
| E-DMM59 | Cdkn2a <sup>+/+</sup> _C57 | SIN.LV.SF.GFP | LIVER | 16 | 81392443 | - | NM_001113208 | Ncam2      | + |
| E-DMM58 | Cdkn2a <sup>+/+</sup> _C57 | SIN.LV.SF.GFP | LIVER | 16 | 81435457 | - | NM_010954    | Ncam2      | + |
| E-DMM65 | Cdkn2a <sup>+/+</sup> _C57 | SIN.LV.SF.GFP | LIVER | 16 | 84840782 | + | NM_008065    | Gabpa      | + |
| E-DMM59 | Cdkn2a <sup>+/+</sup> _C57 | SIN.LV.SF.GFP | LIVER | 16 | 85094135 | + | NM_007471    | App        | - |
| E-DMM52 | Cdkn2a <sup>+/+</sup> _C57 | SIN.LV.SF.GFP | LIVER | 16 | 86115565 | - | NM_011782    | Adamts5    | - |
| E-DMM52 | Cdkn2a <sup>+/+</sup> _C57 | SIN.LV.SF.GFP | LIVER | 16 | 86629932 | - | NM_001159331 | N6amt1     | + |

|         |                            |               |       |    |          |   |              |               |   |
|---------|----------------------------|---------------|-------|----|----------|---|--------------|---------------|---|
| E-DMM58 | Cdkn2a <sup>+/+</sup> _C57 | SIN.LV.SF.GFP | LIVER | 16 | 87410646 | - | NM_001081068 | Rnf160        | - |
| E-DMM65 | Cdkn2a <sup>+/+</sup> _C57 | SIN.LV.SF.GFP | LIVER | 16 | 87727965 | + | NM_007520    | Bach1         | + |
| E-DMM63 | Cdkn2a <sup>+/+</sup> _C57 | SIN.LV.SF.GFP | LIVER | 16 | 91864851 | + | NM_001110275 | Itsn1         | + |
| E-DMM48 | Cdkn2a <sup>+/+</sup> _C57 | SIN.LV.SF.GFP | LIVER | 16 | 95930121 | - | NM_011809    | Ets2          | + |
| E-DMM59 | Cdkn2a <sup>+/+</sup> _C57 | SIN.LV.SF.GFP | LIVER | 16 | 96223189 | + | NM_001103179 | Brwd1         | - |
| E-DMM59 | Cdkn2a <sup>+/+</sup> _C57 | SIN.LV.SF.GFP | LIVER | 16 | 96263040 | + | NM_001103179 | Brwd1         | - |
| E-DMM59 | Cdkn2a <sup>+/+</sup> _C57 | SIN.LV.SF.GFP | LIVER | 16 | 98137966 | - | NM_174847    | C2cd2         | - |
| E-DMM63 | Cdkn2a <sup>+/+</sup> _C57 | SIN.LV.SF.GFP | LIVER | 17 | 3079579  | - | NR_003519    | D030013I16Rik | - |
| E-DMM52 | Cdkn2a <sup>+/+</sup> _C57 | SIN.LV.SF.GFP | LIVER | 17 | 4080978  | + | NM_198958    | Nox3          | - |
| E-DMM55 | Cdkn2a <sup>+/+</sup> _C57 | SIN.LV.SF.GFP | LIVER | 17 | 9522320  | + | NM_025851    | 1700010I14Rik | + |
| E-DMM63 | Cdkn2a <sup>+/+</sup> _C57 | SIN.LV.SF.GFP | LIVER | 17 | 10591966 | - | NM_027032    | Pacrg         | - |
| E-DMM55 | Cdkn2a <sup>+/+</sup> _C57 | SIN.LV.SF.GFP | LIVER | 17 | 12306807 | + | NM_026644    | Agpat4        | + |
| E-DMM65 | Cdkn2a <sup>+/+</sup> _C57 | SIN.LV.SF.GFP | LIVER | 17 | 12328482 | - | NM_026644    | Agpat4        | + |
| E-DMM52 | Cdkn2a <sup>+/+</sup> _C57 | SIN.LV.SF.GFP | LIVER | 17 | 12492520 | - | NM_011948    | Map3k4        | - |
| E-DMM52 | Cdkn2a <sup>+/+</sup> _C57 | SIN.LV.SF.GFP | LIVER | 17 | 12505810 | + | NM_011948    | Map3k4        | - |
| E-DMM50 | Cdkn2a <sup>+/+</sup> _C57 | SIN.LV.SF.GFP | LIVER | 17 | 13992530 | - | NM_010806    | Milt4         | + |
| E-DMM63 | Cdkn2a <sup>+/+</sup> _C57 | SIN.LV.SF.GFP | LIVER | 17 | 14766725 | + | NM_011581    | Thbs2         | - |
| E-DMM55 | Cdkn2a <sup>+/+</sup> _C57 | SIN.LV.SF.GFP | LIVER | 17 | 15522673 | + | NM_007865    | Dll1          | - |
| E-DMM63 | Cdkn2a <sup>+/+</sup> _C57 | SIN.LV.SF.GFP | LIVER | 17 | 15814340 | + | NM_007690    | Chd1          | + |
| E-DMM48 | Cdkn2a <sup>+/+</sup> _C57 | SIN.LV.SF.GFP | LIVER | 17 | 15879773 | + | NM_007690    | Chd1          | + |
| E-DMM55 | Cdkn2a <sup>+/+</sup> _C57 | SIN.LV.SF.GFP | LIVER | 17 | 15953649 | + | NM_178615    | Rgmb          | - |
| E-DMM50 | Cdkn2a <sup>+/+</sup> _C57 | SIN.LV.SF.GFP | LIVER | 17 | 15957235 | + | NM_178615    | Rgmb          | - |
| E-DMM63 | Cdkn2a <sup>+/+</sup> _C57 | SIN.LV.SF.GFP | LIVER | 17 | 15957453 | - | NM_178615    | Rgmb          | - |
| E-DMM63 | Cdkn2a <sup>+/+</sup> _C57 | SIN.LV.SF.GFP | LIVER | 17 | 16188606 | - | NM_178615    | Rgmb          | - |
| E-DMM58 | Cdkn2a <sup>+/+</sup> _C57 | SIN.LV.SF.GFP | LIVER | 17 | 17673475 | + | NM_172827    | Lnpep         | - |
| E-DMM50 | Cdkn2a <sup>+/+</sup> _C57 | SIN.LV.SF.GFP | LIVER | 17 | 17733951 | - | NM_172827    | Lnpep         | - |
| E-DMM63 | Cdkn2a <sup>+/+</sup> _C57 | SIN.LV.SF.GFP | LIVER | 17 | 18006494 | + | NM_013521    | Fpr1          | - |
| E-DMM59 | Cdkn2a <sup>+/+</sup> _C57 | SIN.LV.SF.GFP | LIVER | 17 | 21078411 | + | NM_016891    | Ppp2r1a       | + |
| E-DMM58 | Cdkn2a <sup>+/+</sup> _C57 | SIN.LV.SF.GFP | LIVER | 17 | 22569974 | - | NM_198003    | 1300003B13Rik | + |
| E-DMM65 | Cdkn2a <sup>+/+</sup> _C57 | SIN.LV.SF.GFP | LIVER | 17 | 23284554 | + | NM_009555    | Zfp40         | - |
| E-DMM58 | Cdkn2a <sup>+/+</sup> _C57 | SIN.LV.SF.GFP | LIVER | 17 | 30265489 | + | NM_148926    | Zfand3        | + |

|         |                            |               |       |    |          |   |              |               |   |
|---------|----------------------------|---------------|-------|----|----------|---|--------------|---------------|---|
| E-DMM52 | Cdkn2a <sup>+/+</sup> _C57 | SIN.LV.SF.GFP | LIVER | 17 | 32978350 | - | NM_177359    | Zfp799        | - |
| E-DMM48 | Cdkn2a <sup>+/+</sup> _C57 | SIN.LV.SF.GFP | LIVER | 17 | 33810486 | + | NM_001109913 | Hnrmpm        | - |
| E-DMM63 | Cdkn2a <sup>+/+</sup> _C57 | SIN.LV.SF.GFP | LIVER | 17 | 33852542 | + | NM_145486    | 2-Mar         | - |
| E-DMM58 | Cdkn2a <sup>+/+</sup> _C57 | SIN.LV.SF.GFP | LIVER | 17 | 33900756 | + | NM_008997    | Rab11b        | - |
| E-DMM48 | Cdkn2a <sup>+/+</sup> _C57 | SIN.LV.SF.GFP | LIVER | 17 | 37673955 | - | NM_001005485 | Olfrl11       | + |
| E-DMM52 | Cdkn2a <sup>+/+</sup> _C57 | SIN.LV.SF.GFP | LIVER | 17 | 38142958 | + | NM_146327    | Olfrl29       | - |
| E-DMM57 | Cdkn2a <sup>+/+</sup> _C57 | SIN.LV.SF.GFP | LIVER | 17 | 41083362 | - | NM_008650    | Mut           | + |
| E-DMM52 | Cdkn2a <sup>+/+</sup> _C57 | SIN.LV.SF.GFP | LIVER | 17 | 43467205 | - | NM_133776    | Gpr110        | + |
| E-DMM59 | Cdkn2a <sup>+/+</sup> _C57 | SIN.LV.SF.GFP | LIVER | 17 | 46331233 | + | NM_030715    | Polh          | - |
| E-DMM52 | Cdkn2a <sup>+/+</sup> _C57 | SIN.LV.SF.GFP | LIVER | 17 | 50679571 | + | NM_013880    | Plcl2         | + |
| E-DMM59 | Cdkn2a <sup>+/+</sup> _C57 | SIN.LV.SF.GFP | LIVER | 17 | 53610497 | + | NM_172497    | Efhb          | - |
| E-DMM59 | Cdkn2a <sup>+/+</sup> _C57 | SIN.LV.SF.GFP | LIVER | 17 | 53639499 | - | NM_025887    | Rab5a         | + |
| E-DMM57 | Cdkn2a <sup>+/+</sup> _C57 | SIN.LV.SF.GFP | LIVER | 17 | 55842529 | + | NM_028370    | Pot1b         | - |
| E-DMM63 | Cdkn2a <sup>+/+</sup> _C57 | SIN.LV.SF.GFP | LIVER | 17 | 57017114 | + | NM_030141    | 1700061G19Rik | + |
| E-DMM52 | Cdkn2a <sup>+/+</sup> _C57 | SIN.LV.SF.GFP | LIVER | 17 | 58848923 | + | NM_027001    | 2610034M16Rik | - |
| E-DMM55 | Cdkn2a <sup>+/+</sup> _C57 | SIN.LV.SF.GFP | LIVER | 17 | 59144084 | + | NM_026497    | Nudt12        | - |
| E-DMM55 | Cdkn2a <sup>+/+</sup> _C57 | SIN.LV.SF.GFP | LIVER | 17 | 59147429 | - | NM_026497    | Nudt12        | - |
| E-DMM63 | Cdkn2a <sup>+/+</sup> _C57 | SIN.LV.SF.GFP | LIVER | 17 | 59164195 | - | NM_026497    | Nudt12        | - |
| E-DMM65 | Cdkn2a <sup>+/+</sup> _C57 | SIN.LV.SF.GFP | LIVER | 17 | 59175035 | - | NM_026497    | Nudt12        | - |
| E-DMM59 | Cdkn2a <sup>+/+</sup> _C57 | SIN.LV.SF.GFP | LIVER | 17 | 61607600 | - | NM_010109    | Efna5         | - |
| E-DMM48 | Cdkn2a <sup>+/+</sup> _C57 | SIN.LV.SF.GFP | LIVER | 17 | 61726637 | - | NM_010109    | Efna5         | - |
| E-DMM65 | Cdkn2a <sup>+/+</sup> _C57 | SIN.LV.SF.GFP | LIVER | 17 | 63807909 | + | NM_001037997 | Fert2         | + |
| E-DMM48 | Cdkn2a <sup>+/+</sup> _C57 | SIN.LV.SF.GFP | LIVER | 17 | 63865638 | - | NM_001037997 | Fert2         | + |
| E-DMM52 | Cdkn2a <sup>+/+</sup> _C57 | SIN.LV.SF.GFP | LIVER | 17 | 64236219 | - | NM_001037997 | Fert2         | + |
| E-DMM55 | Cdkn2a <sup>+/+</sup> _C57 | SIN.LV.SF.GFP | LIVER | 17 | 64639853 | + | NM_001025309 | Pja2          | - |
| E-DMM59 | Cdkn2a <sup>+/+</sup> _C57 | SIN.LV.SF.GFP | LIVER | 17 | 64672460 | - | NM_001025309 | Pja2          | - |
| E-DMM57 | Cdkn2a <sup>+/+</sup> _C57 | SIN.LV.SF.GFP | LIVER | 17 | 65048383 | + | NM_008549    | Man2a1        | + |
| E-DMM57 | Cdkn2a <sup>+/+</sup> _C57 | SIN.LV.SF.GFP | LIVER | 17 | 65951902 | - | NM_013933    | Vapa          | - |
| E-DMM57 | Cdkn2a <sup>+/+</sup> _C57 | SIN.LV.SF.GFP | LIVER | 17 | 66443890 | - | NM_028388    | Ndufv2        | - |
| E-DMM48 | Cdkn2a <sup>+/+</sup> _C57 | SIN.LV.SF.GFP | LIVER | 17 | 67265995 | - | NM_008984    | Ptpm          | - |
| E-DMM58 | Cdkn2a <sup>+/+</sup> _C57 | SIN.LV.SF.GFP | LIVER | 17 | 67324464 | - | NM_008984    | Ptpm          | - |

|         |                            |               |       |    |          |   |              |          |   |
|---------|----------------------------|---------------|-------|----|----------|---|--------------|----------|---|
| E-DMM57 | Cdkn2a <sup>+/+</sup> _C57 | SIN.LV.SF.GFP | LIVER | 17 | 69578309 | - | NM_013813    | Epb4.1l3 | + |
| E-DMM63 | Cdkn2a <sup>+/+</sup> _C57 | SIN.LV.SF.GFP | LIVER | 17 | 71987066 | + | NM_177087    | Fam179a  | + |
| E-DMM59 | Cdkn2a <sup>+/+</sup> _C57 | SIN.LV.SF.GFP | LIVER | 17 | 74251707 | + | NM_011723    | Xdh      | - |
| E-DMM49 | Cdkn2a <sup>+/+</sup> _C57 | SIN.LV.SF.GFP | LIVER | 17 | 74338776 | + | NM_053188    | Srd5a2   | - |
| E-DMM59 | Cdkn2a <sup>+/+</sup> _C57 | SIN.LV.SF.GFP | LIVER | 17 | 74597036 | + | NM_133771    | Memo1    | - |
| E-DMM59 | Cdkn2a <sup>+/+</sup> _C57 | SIN.LV.SF.GFP | LIVER | 17 | 74604635 | + | NM_133771    | Memo1    | - |
| E-DMM47 | Cdkn2a <sup>+/+</sup> _C57 | SIN.LV.SF.GFP | LIVER | 17 | 75006471 | + | NM_007566    | Birc6    | + |
| E-DMM59 | Cdkn2a <sup>+/+</sup> _C57 | SIN.LV.SF.GFP | LIVER | 17 | 75198830 | + | NM_152817    | Ttc27    | + |
| E-DMM55 | Cdkn2a <sup>+/+</sup> _C57 | SIN.LV.SF.GFP | LIVER | 17 | 75445888 | - | NM_019919    | Ltbp1    | + |
| E-DMM59 | Cdkn2a <sup>+/+</sup> _C57 | SIN.LV.SF.GFP | LIVER | 17 | 78508079 | + | NM_015800    | Crim1    | + |
| E-DMM50 | Cdkn2a <sup>+/+</sup> _C57 | SIN.LV.SF.GFP | LIVER | 17 | 78790033 | - | NM_199448    | Fez2     | - |
| E-DMM55 | Cdkn2a <sup>+/+</sup> _C57 | SIN.LV.SF.GFP | LIVER | 17 | 80020204 | - | NM_201361    | Fam82a1  | + |
| E-DMM52 | Cdkn2a <sup>+/+</sup> _C57 | SIN.LV.SF.GFP | LIVER | 17 | 81586275 | + | NM_026516    | Tmem178  | + |
| E-DMM55 | Cdkn2a <sup>+/+</sup> _C57 | SIN.LV.SF.GFP | LIVER | 17 | 82022639 | - | NM_001112798 | Slc8a1   | - |
| E-DMM48 | Cdkn2a <sup>+/+</sup> _C57 | SIN.LV.SF.GFP | LIVER | 17 | 82023300 | + | NM_001112798 | Slc8a1   | - |
| E-DMM58 | Cdkn2a <sup>+/+</sup> _C57 | SIN.LV.SF.GFP | LIVER | 17 | 84439498 | + | NM_001001806 | Zfp3612  | - |
| E-DMM59 | Cdkn2a <sup>+/+</sup> _C57 | SIN.LV.SF.GFP | LIVER | 17 | 85164493 | - | NM_028233    | Lrpprc   | - |
| E-DMM58 | Cdkn2a <sup>+/+</sup> _C57 | SIN.LV.SF.GFP | LIVER | 17 | 86565369 | - | NM_011104    | Prkce    | + |
| E-DMM63 | Cdkn2a <sup>+/+</sup> _C57 | SIN.LV.SF.GFP | LIVER | 17 | 87420376 | + | NM_008838    | Pigf     | - |
| E-DMM58 | Cdkn2a <sup>+/+</sup> _C57 | SIN.LV.SF.GFP | LIVER | 17 | 88121475 | - | NM_008628    | Msh2     | + |
| E-DMM58 | Cdkn2a <sup>+/+</sup> _C57 | SIN.LV.SF.GFP | LIVER | 17 | 88377689 | - | NM_010830    | Msh6     | + |
| E-DMM57 | Cdkn2a <sup>+/+</sup> _C57 | SIN.LV.SF.GFP | LIVER | 17 | 88433976 | - | NM_001081034 | Fbxo11   | - |
| E-DMM57 | Cdkn2a <sup>+/+</sup> _C57 | SIN.LV.SF.GFP | LIVER | 17 | 89499777 | - | NM_013523    | Fshr     | - |
| E-DMM59 | Cdkn2a <sup>+/+</sup> _C57 | SIN.LV.SF.GFP | LIVER | 17 | 90776303 | + | NM_020252    | Nrxn1    | - |
| E-DMM63 | Cdkn2a <sup>+/+</sup> _C57 | SIN.LV.SF.GFP | LIVER | 17 | 91327916 | - | NM_020252    | Nrxn1    | - |
| E-DMM64 | Cdkn2a <sup>+/+</sup> _C57 | SIN.LV.SF.GFP | LIVER | 17 | 91734850 | - | NM_020252    | Nrxn1    | - |
| E-DMM63 | Cdkn2a <sup>+/+</sup> _C57 | SIN.LV.SF.GFP | LIVER | 18 | 3267095  | + | NM_001110850 | Crem     | - |
| E-DMM50 | Cdkn2a <sup>+/+</sup> _C57 | SIN.LV.SF.GFP | LIVER | 18 | 3278712  | - | NM_001110854 | Crem     | - |
| E-DMM57 | Cdkn2a <sup>+/+</sup> _C57 | SIN.LV.SF.GFP | LIVER | 18 | 5758743  | + | NM_011546    | Zeb1     | + |
| E-DMM52 | Cdkn2a <sup>+/+</sup> _C57 | SIN.LV.SF.GFP | LIVER | 18 | 6454314  | + | NM_027497    | Epc1     | - |
| E-DMM58 | Cdkn2a <sup>+/+</sup> _C57 | SIN.LV.SF.GFP | LIVER | 18 | 6768531  | - | NM_181070    | Rab18    | + |



|         |                            |               |       |    |          |   |              |               |   |
|---------|----------------------------|---------------|-------|----|----------|---|--------------|---------------|---|
| E-DMM57 | Cdkn2a <sup>+/+</sup> _C57 | SIN.LV.SF.GFP | LIVER | 18 | 7867923  | + | NR_027465    | Wac           | + |
| E-DMM59 | Cdkn2a <sup>+/+</sup> _C57 | SIN.LV.SF.GFP | LIVER | 18 | 8932155  | + | NM_008058    | Fzd8          | + |
| E-DMM63 | Cdkn2a <sup>+/+</sup> _C57 | SIN.LV.SF.GFP | LIVER | 18 | 10385128 | - | NM_001083628 | AK220484      | + |
| E-DMM52 | Cdkn2a <sup>+/+</sup> _C57 | SIN.LV.SF.GFP | LIVER | 18 | 11042337 | + | NM_010258    | Gata6         | + |
| E-DMM52 | Cdkn2a <sup>+/+</sup> _C57 | SIN.LV.SF.GFP | LIVER | 18 | 11837257 | + | NM_001081223 | Rbbp8         | + |
| E-DMM63 | Cdkn2a <sup>+/+</sup> _C57 | SIN.LV.SF.GFP | LIVER | 18 | 12389265 | + | NM_008720    | Npc1          | - |
| E-DMM57 | Cdkn2a <sup>+/+</sup> _C57 | SIN.LV.SF.GFP | LIVER | 18 | 12983140 | - | NM_207530    | Osbp1a        | - |
| E-DMM50 | Cdkn2a <sup>+/+</sup> _C57 | SIN.LV.SF.GFP | LIVER | 18 | 13138527 | - | NM_008378    | Impact        | + |
| E-DMM58 | Cdkn2a <sup>+/+</sup> _C57 | SIN.LV.SF.GFP | LIVER | 18 | 13696497 | - | NM_145492    | Zfp521        | - |
| E-DMM52 | Cdkn2a <sup>+/+</sup> _C57 | SIN.LV.SF.GFP | LIVER | 18 | 15032187 | + | NM_001100449 | Taf4b         | + |
| E-DMM47 | Cdkn2a <sup>+/+</sup> _C57 | SIN.LV.SF.GFP | LIVER | 18 | 16888127 | - | NM_007664    | Cdh2          | - |
| E-DMM48 | Cdkn2a <sup>+/+</sup> _C57 | SIN.LV.SF.GFP | LIVER | 18 | 17526937 | - | NM_007664    | Cdh2          | - |
| E-DMM48 | Cdkn2a <sup>+/+</sup> _C57 | SIN.LV.SF.GFP | LIVER | 18 | 18387397 | - | NM_007664    | Cdh2          | - |
| E-DMM52 | Cdkn2a <sup>+/+</sup> _C57 | SIN.LV.SF.GFP | LIVER | 18 | 18439283 | + | NM_007664    | Cdh2          | - |
| E-DMM50 | Cdkn2a <sup>+/+</sup> _C57 | SIN.LV.SF.GFP | LIVER | 18 | 21800397 | - | NM_001081403 | Klhl14        | - |
| E-DMM52 | Cdkn2a <sup>+/+</sup> _C57 | SIN.LV.SF.GFP | LIVER | 18 | 22063810 | + | NM_027616    | 4921528I01Rik | - |
| E-DMM52 | Cdkn2a <sup>+/+</sup> _C57 | SIN.LV.SF.GFP | LIVER | 18 | 23000184 | - | NM_001161483 | Nol4          | - |
| E-DMM59 | Cdkn2a <sup>+/+</sup> _C57 | SIN.LV.SF.GFP | LIVER | 18 | 25584685 | - | NM_001033532 | AW554918      | + |
| E-DMM59 | Cdkn2a <sup>+/+</sup> _C57 | SIN.LV.SF.GFP | LIVER | 18 | 26308571 | - | NM_001146292 | Brunol4       | - |
| E-DMM65 | Cdkn2a <sup>+/+</sup> _C57 | SIN.LV.SF.GFP | LIVER | 18 | 26986845 | - | NM_001146292 | Brunol4       | - |
| E-DMM50 | Cdkn2a <sup>+/+</sup> _C57 | SIN.LV.SF.GFP | LIVER | 18 | 27476390 | + | NM_001146292 | Brunol4       | - |
| E-DMM57 | Cdkn2a <sup>+/+</sup> _C57 | SIN.LV.SF.GFP | LIVER | 18 | 28796702 | - | NM_181414    | Pik3c3        | + |
| E-DMM59 | Cdkn2a <sup>+/+</sup> _C57 | SIN.LV.SF.GFP | LIVER | 18 | 30463433 | - | NM_181414    | Pik3c3        | + |
| E-DMM47 | Cdkn2a <sup>+/+</sup> _C57 | SIN.LV.SF.GFP | LIVER | 18 | 33153111 | + | NM_009793    | Camk4         | + |
| E-DMM63 | Cdkn2a <sup>+/+</sup> _C57 | SIN.LV.SF.GFP | LIVER | 18 | 34774721 | + | NM_030147    | Brd8          | - |
| E-DMM57 | Cdkn2a <sup>+/+</sup> _C57 | SIN.LV.SF.GFP | LIVER | 18 | 38034056 | + | NM_007858    | Diap1         | - |
| E-DMM63 | Cdkn2a <sup>+/+</sup> _C57 | SIN.LV.SF.GFP | LIVER | 18 | 39238127 | - | NM_175164    | Arhgap26      | + |
| E-DMM52 | Cdkn2a <sup>+/+</sup> _C57 | SIN.LV.SF.GFP | LIVER | 18 | 39580961 | - | NM_008173    | Nr3c1         | - |
| E-DMM65 | Cdkn2a <sup>+/+</sup> _C57 | SIN.LV.SF.GFP | LIVER | 18 | 42067453 | - | NM_029942    | Preli2        | - |
| E-DMM59 | Cdkn2a <sup>+/+</sup> _C57 | SIN.LV.SF.GFP | LIVER | 18 | 42463311 | + | NM_172626    | Rbm27         | + |
| E-DMM52 | Cdkn2a <sup>+/+</sup> _C57 | SIN.LV.SF.GFP | LIVER | 18 | 44141119 | + | NM_001081180 | Spink5        | + |

|         |                            |               |       |    |          |   |              |          |   |
|---------|----------------------------|---------------|-------|----|----------|---|--------------|----------|---|
| E-DMM57 | Cdkn2a <sup>+/+</sup> _C57 | SIN.LV.SF.GFP | LIVER | 18 | 45040923 | + | NM_001085373 | Mcc      | - |
| E-DMM65 | Cdkn2a <sup>+/+</sup> _C57 | SIN.LV.SF.GFP | LIVER | 18 | 46407029 | + | NM_172627    | Pggt1b   | - |
| E-DMM48 | Cdkn2a <sup>+/+</sup> _C57 | SIN.LV.SF.GFP | LIVER | 18 | 46668986 | - | NM_173423    | Fem1c    | - |
| E-DMM65 | Cdkn2a <sup>+/+</sup> _C57 | SIN.LV.SF.GFP | LIVER | 18 | 46944926 | + | NM_009681    | Ap3s1    | + |
| E-DMM59 | Cdkn2a <sup>+/+</sup> _C57 | SIN.LV.SF.GFP | LIVER | 18 | 50088206 | - | NM_001081371 | Dmx1l    | + |
| E-DMM52 | Cdkn2a <sup>+/+</sup> _C57 | SIN.LV.SF.GFP | LIVER | 18 | 50230794 | - | NM_134131    | Tnfaip8  | + |
| E-DMM63 | Cdkn2a <sup>+/+</sup> _C57 | SIN.LV.SF.GFP | LIVER | 18 | 50977402 | - | NM_026108    | Hdhd1a   | - |
| E-DMM58 | Cdkn2a <sup>+/+</sup> _C57 | SIN.LV.SF.GFP | LIVER | 18 | 51262123 | - | NM_001081224 | Prr16    | + |
| E-DMM47 | Cdkn2a <sup>+/+</sup> _C57 | SIN.LV.SF.GFP | LIVER | 18 | 53019047 | + | NM_026408    | Sncaip   | + |
| E-DMM57 | Cdkn2a <sup>+/+</sup> _C57 | SIN.LV.SF.GFP | LIVER | 18 | 53201232 | + | NM_026408    | Sncaip   | + |
| E-DMM48 | Cdkn2a <sup>+/+</sup> _C57 | SIN.LV.SF.GFP | LIVER | 18 | 53366551 | + | NM_026386    | Snx2     | + |
| E-DMM52 | Cdkn2a <sup>+/+</sup> _C57 | SIN.LV.SF.GFP | LIVER | 18 | 53369444 | - | NM_026386    | Snx2     | + |
| E-DMM52 | Cdkn2a <sup>+/+</sup> _C57 | SIN.LV.SF.GFP | LIVER | 18 | 56231852 | - | NM_026240    | Gramd3   | + |
| E-DMM52 | Cdkn2a <sup>+/+</sup> _C57 | SIN.LV.SF.GFP | LIVER | 18 | 56879570 | + | NM_010721    | Lmb1     | + |
| E-DMM63 | Cdkn2a <sup>+/+</sup> _C57 | SIN.LV.SF.GFP | LIVER | 18 | 59858726 | + | NM_001081328 | Chsy3    | + |
| E-DMM63 | Cdkn2a <sup>+/+</sup> _C57 | SIN.LV.SF.GFP | LIVER | 18 | 61546482 | + | NM_133249    | Ppargc1b | - |
| E-DMM55 | Cdkn2a <sup>+/+</sup> _C57 | SIN.LV.SF.GFP | LIVER | 18 | 62318944 | + | NM_007420    | Adrb2    | - |
| E-DMM58 | Cdkn2a <sup>+/+</sup> _C57 | SIN.LV.SF.GFP | LIVER | 18 | 63293625 | + | NM_001039485 | Fam38b   | - |
| E-DMM63 | Cdkn2a <sup>+/+</sup> _C57 | SIN.LV.SF.GFP | LIVER | 18 | 63823523 | + | NM_016792    | Txn1     | - |
| E-DMM63 | Cdkn2a <sup>+/+</sup> _C57 | SIN.LV.SF.GFP | LIVER | 18 | 65148466 | - | NM_001114386 | Nedd4l   | + |
| E-DMM63 | Cdkn2a <sup>+/+</sup> _C57 | SIN.LV.SF.GFP | LIVER | 18 | 68014213 | + | NM_001039088 | Seh1l    | + |
| E-DMM52 | Cdkn2a <sup>+/+</sup> _C57 | SIN.LV.SF.GFP | LIVER | 18 | 69575089 | - | NM_001083967 | Tcf4     | + |
| E-DMM63 | Cdkn2a <sup>+/+</sup> _C57 | SIN.LV.SF.GFP | LIVER | 18 | 69810339 | - | NM_001083967 | Tcf4     | + |
| E-DMM63 | Cdkn2a <sup>+/+</sup> _C57 | SIN.LV.SF.GFP | LIVER | 18 | 70094715 | - | NM_201362    | Ccdc68   | + |
| E-DMM55 | Cdkn2a <sup>+/+</sup> _C57 | SIN.LV.SF.GFP | LIVER | 18 | 70725338 | - | NM_010773    | Mbd2     | + |
| E-DMM57 | Cdkn2a <sup>+/+</sup> _C57 | SIN.LV.SF.GFP | LIVER | 18 | 70731945 | + | NM_010773    | Mbd2     | + |
| E-DMM52 | Cdkn2a <sup>+/+</sup> _C57 | SIN.LV.SF.GFP | LIVER | 18 | 70752962 | + | NM_010773    | Mbd2     | + |
| E-DMM63 | Cdkn2a <sup>+/+</sup> _C57 | SIN.LV.SF.GFP | LIVER | 18 | 71464029 | + | NM_007831    | Dcc      | - |
| E-DMM50 | Cdkn2a <sup>+/+</sup> _C57 | SIN.LV.SF.GFP | LIVER | 18 | 71818091 | + | NM_007831    | Dcc      | - |
| E-DMM52 | Cdkn2a <sup>+/+</sup> _C57 | SIN.LV.SF.GFP | LIVER | 18 | 72834069 | - | NM_007831    | Dcc      | - |
| E-DMM58 | Cdkn2a <sup>+/+</sup> _C57 | SIN.LV.SF.GFP | LIVER | 18 | 81047881 | - | NM_015805    | Atp9b    | - |

|         |                            |               |       |    |          |   |              |          |   |
|---------|----------------------------|---------------|-------|----|----------|---|--------------|----------|---|
| E-DMM55 | Cdkn2a <sup>+/+</sup> _C57 | SIN.LV.SF.GFP | LIVER | 18 | 82858472 | + | NM_001025251 | Mbp      | + |
| E-DMM65 | Cdkn2a <sup>+/+</sup> _C57 | SIN.LV.SF.GFP | LIVER | 18 | 83149751 | - | NM_183033    | Zfp516   | + |
| E-DMM48 | Cdkn2a <sup>+/+</sup> _C57 | SIN.LV.SF.GFP | LIVER | 18 | 83165909 | - | NM_183033    | Zfp516   | + |
| E-DMM47 | Cdkn2a <sup>+/+</sup> _C57 | SIN.LV.SF.GFP | LIVER | 18 | 84113684 | - | NM_001081300 | Tshz1    | - |
| E-DMM58 | Cdkn2a <sup>+/+</sup> _C57 | SIN.LV.SF.GFP | LIVER | 18 | 84627409 | - | NM_177450    | Cndp1    | - |
| E-DMM52 | Cdkn2a <sup>+/+</sup> _C57 | SIN.LV.SF.GFP | LIVER | 18 | 84668180 | + | NM_177450    | Cndp1    | - |
| E-DMM50 | Cdkn2a <sup>+/+</sup> _C57 | SIN.LV.SF.GFP | LIVER | 18 | 86590036 | + | NM_144946    | Neto1    | + |
| E-DMM55 | Cdkn2a <sup>+/+</sup> _C57 | SIN.LV.SF.GFP | LIVER | 18 | 87379938 | - | NM_172633    | Cbln2    | + |
| E-DMM65 | Cdkn2a <sup>+/+</sup> _C57 | SIN.LV.SF.GFP | LIVER | 18 | 88224089 | - | NM_018821    | Socs6    | - |
| E-DMM50 | Cdkn2a <sup>+/+</sup> _C57 | SIN.LV.SF.GFP | LIVER | 18 | 89071892 | + | NM_018821    | Socs6    | - |
| E-DMM55 | Cdkn2a <sup>+/+</sup> _C57 | SIN.LV.SF.GFP | LIVER | 18 | 89216569 | - | NM_175542    | Rtnn     | + |
| E-DMM65 | Cdkn2a <sup>+/+</sup> _C57 | SIN.LV.SF.GFP | LIVER | 18 | 89230316 | + | NM_175542    | Rtnn     | + |
| E-DMM58 | Cdkn2a <sup>+/+</sup> _C57 | SIN.LV.SF.GFP | LIVER | 18 | 89779722 | + | NM_001039173 | Dok6     | - |
| E-DMM55 | Cdkn2a <sup>+/+</sup> _C57 | SIN.LV.SF.GFP | LIVER | 19 | 3783388  | + | NM_144871    | Suv420h1 | + |
| E-DMM52 | Cdkn2a <sup>+/+</sup> _C57 | SIN.LV.SF.GFP | LIVER | 19 | 4746049  | - | NM_021287    | Spnb3    | + |
| E-DMM59 | Cdkn2a <sup>+/+</sup> _C57 | SIN.LV.SF.GFP | LIVER | 19 | 4857291  | + | NM_019861    | Ctsf     | + |
| E-DMM65 | Cdkn2a <sup>+/+</sup> _C57 | SIN.LV.SF.GFP | LIVER | 19 | 6455747  | + | NM_020253    | Nrxn2    | + |
| E-DMM63 | Cdkn2a <sup>+/+</sup> _C57 | SIN.LV.SF.GFP | LIVER | 19 | 7504106  | + | NM_001003933 | Rtn3     | - |
| E-DMM57 | Cdkn2a <sup>+/+</sup> _C57 | SIN.LV.SF.GFP | LIVER | 19 | 9218281  | - | NM_025610    | Asrgl1   | - |
| E-DMM58 | Cdkn2a <sup>+/+</sup> _C57 | SIN.LV.SF.GFP | LIVER | 19 | 11875428 | - | NM_011502    | Stx3     | - |
| E-DMM50 | Cdkn2a <sup>+/+</sup> _C57 | SIN.LV.SF.GFP | LIVER | 19 | 14191917 | + | NM_001011850 | Olfr1505 | + |
| E-DMM57 | Cdkn2a <sup>+/+</sup> _C57 | SIN.LV.SF.GFP | LIVER | 19 | 14526329 | - | NM_011600    | Tle4     | - |
| E-DMM58 | Cdkn2a <sup>+/+</sup> _C57 | SIN.LV.SF.GFP | LIVER | 19 | 14528807 | + | NM_011600    | Tle4     | - |
| E-DMM59 | Cdkn2a <sup>+/+</sup> _C57 | SIN.LV.SF.GFP | LIVER | 19 | 14568779 | + | NM_011600    | Tle4     | - |
| E-DMM57 | Cdkn2a <sup>+/+</sup> _C57 | SIN.LV.SF.GFP | LIVER | 19 | 16163841 | - | NM_008139    | Gnaq     | + |
| E-DMM52 | Cdkn2a <sup>+/+</sup> _C57 | SIN.LV.SF.GFP | LIVER | 19 | 16288524 | + | NM_008139    | Gnaq     | + |
| E-DMM52 | Cdkn2a <sup>+/+</sup> _C57 | SIN.LV.SF.GFP | LIVER | 19 | 17103322 | + | NM_008023    | Foxb2    | - |
| E-DMM52 | Cdkn2a <sup>+/+</sup> _C57 | SIN.LV.SF.GFP | LIVER | 19 | 17420522 | + | NM_173442    | Gcnt1    | - |
| E-DMM49 | Cdkn2a <sup>+/+</sup> _C57 | SIN.LV.SF.GFP | LIVER | 19 | 20760493 | + | NM_011921    | Aldh1a7  | - |
| E-DMM63 | Cdkn2a <sup>+/+</sup> _C57 | SIN.LV.SF.GFP | LIVER | 19 | 20767826 | - | NM_011921    | Aldh1a7  | - |
| E-DMM58 | Cdkn2a <sup>+/+</sup> _C57 | SIN.LV.SF.GFP | LIVER | 19 | 21544148 | + | NM_010266    | Gda      | - |

|         |                            |               |       |    |          |   |              |               |   |
|---------|----------------------------|---------------|-------|----|----------|---|--------------|---------------|---|
| E-DMM59 | Cdkn2a <sup>+/+</sup> _C57 | SIN.LV.SF.GFP | LIVER | 19 | 21735979 | + | NM_146096    | Fam108b       | + |
| E-DMM65 | Cdkn2a <sup>+/+</sup> _C57 | SIN.LV.SF.GFP | LIVER | 19 | 22013658 | - | NM_001033759 | Tmem2         | + |
| E-DMM49 | Cdkn2a <sup>+/+</sup> _C57 | SIN.LV.SF.GFP | LIVER | 19 | 26005850 | - | NM_145831    | Dmrt2         | + |
| E-DMM49 | Cdkn2a <sup>+/+</sup> _C57 | SIN.LV.SF.GFP | LIVER | 19 | 26411431 | - | NM_011416    | Smarca2       | + |
| E-DMM58 | Cdkn2a <sup>+/+</sup> _C57 | SIN.LV.SF.GFP | LIVER | 19 | 27904610 | + | NM_011265    | Rfx3          | - |
| E-DMM48 | Cdkn2a <sup>+/+</sup> _C57 | SIN.LV.SF.GFP | LIVER | 19 | 28007104 | - | NM_011265    | Rfx3          | - |
| E-DMM57 | Cdkn2a <sup>+/+</sup> _C57 | SIN.LV.SF.GFP | LIVER | 19 | 28058278 | - | NM_011265    | Rfx3          | - |
| E-DMM57 | Cdkn2a <sup>+/+</sup> _C57 | SIN.LV.SF.GFP | LIVER | 19 | 29621567 | - | NM_001081319 | C030046E11Rik | + |
| E-DMM57 | Cdkn2a <sup>+/+</sup> _C57 | SIN.LV.SF.GFP | LIVER | 19 | 29812257 | + | NM_172836    | 9930021J03Rik | - |
| E-DMM55 | Cdkn2a <sup>+/+</sup> _C57 | SIN.LV.SF.GFP | LIVER | 19 | 32722111 | - | NM_011864    | Papss2        | + |
| E-DMM59 | Cdkn2a <sup>+/+</sup> _C57 | SIN.LV.SF.GFP | LIVER | 19 | 34932214 | - | NM_023792    | Pank1         | - |
| E-DMM57 | Cdkn2a <sup>+/+</sup> _C57 | SIN.LV.SF.GFP | LIVER | 19 | 36083860 | - | NM_008315    | Htr7          | - |
| E-DMM55 | Cdkn2a <sup>+/+</sup> _C57 | SIN.LV.SF.GFP | LIVER | 19 | 36520619 | - | NM_029508    | Pcgf5         | + |
| E-DMM63 | Cdkn2a <sup>+/+</sup> _C57 | SIN.LV.SF.GFP | LIVER | 19 | 38646171 | + | NM_019588    | Plce1         | + |
| E-DMM52 | Cdkn2a <sup>+/+</sup> _C57 | SIN.LV.SF.GFP | LIVER | 19 | 39033130 | - | NM_008234    | Hells         | + |
| E-DMM52 | Cdkn2a <sup>+/+</sup> _C57 | SIN.LV.SF.GFP | LIVER | 19 | 43127414 | - | NM_001081257 | LOC545291     | - |
| E-DMM52 | Cdkn2a <sup>+/+</sup> _C57 | SIN.LV.SF.GFP | LIVER | 19 | 45839740 | - | NM_023799    | Mgea5         | - |
| E-DMM50 | Cdkn2a <sup>+/+</sup> _C57 | SIN.LV.SF.GFP | LIVER | 19 | 46552899 | + | NM_001025391 | Sufu          | + |
| E-DMM50 | Cdkn2a <sup>+/+</sup> _C57 | SIN.LV.SF.GFP | LIVER | 19 | 48786610 | - | NM_025696    | Sorcs3        | + |
| E-DMM59 | Cdkn2a <sup>+/+</sup> _C57 | SIN.LV.SF.GFP | LIVER | 19 | 50277796 | - | NM_021377    | Sorcs1        | - |
| E-DMM58 | Cdkn2a <sup>+/+</sup> _C57 | SIN.LV.SF.GFP | LIVER | 19 | 50324060 | - | NM_021377    | Sorcs1        | - |
| E-DMM58 | Cdkn2a <sup>+/+</sup> _C57 | SIN.LV.SF.GFP | LIVER | 19 | 53250141 | + | NM_013758    | Add3          | + |
| E-DMM55 | Cdkn2a <sup>+/+</sup> _C57 | SIN.LV.SF.GFP | LIVER | 19 | 53269247 | + | NM_013758    | Add3          | + |
| E-DMM50 | Cdkn2a <sup>+/+</sup> _C57 | SIN.LV.SF.GFP | LIVER | 19 | 53694655 | - | NM_007790    | Smc3          | + |
| E-DMM52 | Cdkn2a <sup>+/+</sup> _C57 | SIN.LV.SF.GFP | LIVER | 19 | 54352571 | - | NM_007417    | Adra2a        | + |
| E-DMM52 | Cdkn2a <sup>+/+</sup> _C57 | SIN.LV.SF.GFP | LIVER | 19 | 55185564 | + | NM_008149    | Gpam          | - |
| E-DMM52 | Cdkn2a <sup>+/+</sup> _C57 | SIN.LV.SF.GFP | LIVER | 19 | 57134258 | + | NM_001103177 | Ablim1        | - |
| E-DMM52 | Cdkn2a <sup>+/+</sup> _C57 | SIN.LV.SF.GFP | LIVER | 19 | 58114612 | + | NM_181415    | Atrnl1        | + |
| E-DMM63 | Cdkn2a <sup>+/+</sup> _C57 | SIN.LV.SF.GFP | LIVER | 19 | 60863139 | - | NM_010123    | Eif3a         | - |
| E-DMM49 | Cdkn2a <sup>+/+</sup> _C57 | SIN.LV.SF.GFP | LIVER | 19 | 60996386 | + | NM_018869    | Grk5          | + |
| E-DMM57 | Cdkn2a <sup>+/+</sup> _C57 | SIN.LV.SF.GFP | LIVER | X  | 6077659  | - | NM_001040459 | Shroom4       | + |

|         |                            |               |       |   |          |   |              |               |   |
|---------|----------------------------|---------------|-------|---|----------|---|--------------|---------------|---|
| E-DMM57 | Cdkn2a <sup>+/+</sup> _C57 | SIN.LV.SF.GFP | LIVER | X | 6807511  | - | NM_016691    | Clcn5         | - |
| E-DMM63 | Cdkn2a <sup>+/+</sup> _C57 | SIN.LV.SF.GFP | LIVER | X | 6890579  | + | NM_019461    | Usp27x        | - |
| E-DMM50 | Cdkn2a <sup>+/+</sup> _C57 | SIN.LV.SF.GFP | LIVER | X | 9513020  | - | NM_177704    | Syt5          | + |
| E-DMM52 | Cdkn2a <sup>+/+</sup> _C57 | SIN.LV.SF.GFP | LIVER | X | 12813808 | - | NM_010028    | Ddx3x         | + |
| E-DMM52 | Cdkn2a <sup>+/+</sup> _C57 | SIN.LV.SF.GFP | LIVER | X | 12862051 | - | NM_010028    | Ddx3x         | + |
| E-DMM50 | Cdkn2a <sup>+/+</sup> _C57 | SIN.LV.SF.GFP | LIVER | X | 13186891 | + | NM_009806    | Cask          | - |
| E-DMM57 | Cdkn2a <sup>+/+</sup> _C57 | SIN.LV.SF.GFP | LIVER | X | 13315414 | + | NM_009806    | Cask          | - |
| E-DMM63 | Cdkn2a <sup>+/+</sup> _C57 | SIN.LV.SF.GFP | LIVER | X | 13407504 | + | NM_009806    | Cask          | - |
| E-DMM57 | Cdkn2a <sup>+/+</sup> _C57 | SIN.LV.SF.GFP | LIVER | X | 14230007 | - | NM_001034100 | Gm5382        | + |
| E-DMM59 | Cdkn2a <sup>+/+</sup> _C57 | SIN.LV.SF.GFP | LIVER | X | 14324295 | + | NM_026128    | 4930403L05Rik | - |
| E-DMM57 | Cdkn2a <sup>+/+</sup> _C57 | SIN.LV.SF.GFP | LIVER | X | 17813746 | + | NM_009483    | Kdm6a         | + |
| E-DMM57 | Cdkn2a <sup>+/+</sup> _C57 | SIN.LV.SF.GFP | LIVER | X | 20313684 | + | NM_145628    | Usp11         | + |
| E-DMM63 | Cdkn2a <sup>+/+</sup> _C57 | SIN.LV.SF.GFP | LIVER | X | 20351635 | - | NM_145628    | Usp11         | + |
| E-DMM58 | Cdkn2a <sup>+/+</sup> _C57 | SIN.LV.SF.GFP | LIVER | X | 22356038 | - | NM_029707    | 1700023I07Rik | - |
| E-DMM52 | Cdkn2a <sup>+/+</sup> _C57 | SIN.LV.SF.GFP | LIVER | X | 22825260 | - | NM_026167    | Klh13         | - |
| E-DMM52 | Cdkn2a <sup>+/+</sup> _C57 | SIN.LV.SF.GFP | LIVER | X | 23295416 | + | NM_175180    | Wdr44         | + |
| E-DMM58 | Cdkn2a <sup>+/+</sup> _C57 | SIN.LV.SF.GFP | LIVER | X | 23296666 | - | NM_175180    | Wdr44         | + |
| E-DMM50 | Cdkn2a <sup>+/+</sup> _C57 | SIN.LV.SF.GFP | LIVER | X | 23330872 | - | NM_175180    | Wdr44         | + |
| E-DMM52 | Cdkn2a <sup>+/+</sup> _C57 | SIN.LV.SF.GFP | LIVER | X | 33796127 | + | NM_028325    | Zcchc12       | + |
| E-DMM48 | Cdkn2a <sup>+/+</sup> _C57 | SIN.LV.SF.GFP | LIVER | X | 35890819 | + | NM_001110142 | Cul4b         | - |
| E-DMM63 | Cdkn2a <sup>+/+</sup> _C57 | SIN.LV.SF.GFP | LIVER | X | 35937636 | + | NM_001110142 | Cul4b         | - |
| E-DMM50 | Cdkn2a <sup>+/+</sup> _C57 | SIN.LV.SF.GFP | LIVER | X | 36973582 | + | NM_183126    | 6030498E09Rik | + |
| E-DMM58 | Cdkn2a <sup>+/+</sup> _C57 | SIN.LV.SF.GFP | LIVER | X | 38136040 | + | NM_016886    | Gria3         | + |
| E-DMM58 | Cdkn2a <sup>+/+</sup> _C57 | SIN.LV.SF.GFP | LIVER | X | 38834241 | + | NM_016886    | Gria3         | + |
| E-DMM59 | Cdkn2a <sup>+/+</sup> _C57 | SIN.LV.SF.GFP | LIVER | X | 39229231 | + | NM_001033422 | Thoc2         | - |
| E-DMM57 | Cdkn2a <sup>+/+</sup> _C57 | SIN.LV.SF.GFP | LIVER | X | 39257593 | - | NM_001033422 | Thoc2         | - |
| E-DMM52 | Cdkn2a <sup>+/+</sup> _C57 | SIN.LV.SF.GFP | LIVER | X | 39286512 | - | NM_001033422 | Thoc2         | - |
| E-DMM59 | Cdkn2a <sup>+/+</sup> _C57 | SIN.LV.SF.GFP | LIVER | X | 41716522 | + | NM_175539    | Wdr40c        | - |
| E-DMM48 | Cdkn2a <sup>+/+</sup> _C57 | SIN.LV.SF.GFP | LIVER | X | 43418051 | - | NM_028514    | Actrt1        | + |
| E-DMM65 | Cdkn2a <sup>+/+</sup> _C57 | SIN.LV.SF.GFP | LIVER | X | 45234649 | + | NM_053123    | Smarca1       | - |
| E-DMM57 | Cdkn2a <sup>+/+</sup> _C57 | SIN.LV.SF.GFP | LIVER | X | 46452932 | - | NM_145951    | Enox2         | - |

|         |                            |               |       |   |           |   |              |                    |   |
|---------|----------------------------|---------------|-------|---|-----------|---|--------------|--------------------|---|
| E-DMM49 | Cdkn2a <sup>+/+</sup> _C57 | SIN.LV.SF.GFP | LIVER | X | 50306495  | + | NM_027642    | Phf6               | + |
| E-DMM57 | Cdkn2a <sup>+/+</sup> _C57 | SIN.LV.SF.GFP | LIVER | X | 50346786  | - | NM_013556    | Hprt1              | + |
| E-DMM58 | Cdkn2a <sup>+/+</sup> _C57 | SIN.LV.SF.GFP | LIVER | X | 50560367  | - | NM_030167    | Fam122b            | - |
| E-DMM65 | Cdkn2a <sup>+/+</sup> _C57 | SIN.LV.SF.GFP | LIVER | X | 54625218  | + | NM_011252    | RbmX               | - |
| E-DMM65 | Cdkn2a <sup>+/+</sup> _C57 | SIN.LV.SF.GFP | LIVER | X | 54962610  | - | NM_001033360 | Gpr101             | - |
| E-DMM50 | Cdkn2a <sup>+/+</sup> _C57 | SIN.LV.SF.GFP | LIVER | X | 57528905  | + | NM_001001798 | Atp11c             | - |
| E-DMM57 | Cdkn2a <sup>+/+</sup> _C57 | SIN.LV.SF.GFP | LIVER | X | 57618177  | + | NM_001001798 | Atp11c             | - |
| E-DMM48 | Cdkn2a <sup>+/+</sup> _C57 | SIN.LV.SF.GFP | LIVER | X | 63018962  | - | NM_001161431 | Slitrk2            | + |
| E-DMM50 | Cdkn2a <sup>+/+</sup> _C57 | SIN.LV.SF.GFP | LIVER | X | 72620067  | + | NM_001161373 | F8                 | - |
| E-DMM59 | Cdkn2a <sup>+/+</sup> _C57 | SIN.LV.SF.GFP | LIVER | X | 75728050  | + | NM_001126321 | OTTMUSG00000017864 | - |
| E-DMM52 | Cdkn2a <sup>+/+</sup> _C57 | SIN.LV.SF.GFP | LIVER | X | 75805141  | + | NM_001126321 | OTTMUSG00000017864 | - |
| E-DMM52 | Cdkn2a <sup>+/+</sup> _C57 | SIN.LV.SF.GFP | LIVER | X | 78041301  | - | NM_138751    | Tmem47             | + |
| E-DMM52 | Cdkn2a <sup>+/+</sup> _C57 | SIN.LV.SF.GFP | LIVER | X | 79601331  | - | NM_007868    | Dmd                | + |
| E-DMM50 | Cdkn2a <sup>+/+</sup> _C57 | SIN.LV.SF.GFP | LIVER | X | 81970640  | + | NM_007868    | Dmd                | + |
| E-DMM65 | Cdkn2a <sup>+/+</sup> _C57 | SIN.LV.SF.GFP | LIVER | X | 82536144  | - | NM_007868    | Dmd                | + |
| E-DMM47 | Cdkn2a <sup>+/+</sup> _C57 | SIN.LV.SF.GFP | LIVER | X | 86621071  | - | NM_008821    | Pet2               | - |
| E-DMM65 | Cdkn2a <sup>+/+</sup> _C57 | SIN.LV.SF.GFP | LIVER | X | 88862406  | - | NM_001114678 | Gm5072             | + |
| E-DMM57 | Cdkn2a <sup>+/+</sup> _C57 | SIN.LV.SF.GFP | LIVER | X | 89812267  | - | NM_173783    | Mageb18            | - |
| E-DMM57 | Cdkn2a <sup>+/+</sup> _C57 | SIN.LV.SF.GFP | LIVER | X | 91360661  | - | NM_001044386 | Zfx                | - |
| E-DMM58 | Cdkn2a <sup>+/+</sup> _C57 | SIN.LV.SF.GFP | LIVER | X | 93542050  | - | NM_172931    | B230358A15Rik      | - |
| E-DMM50 | Cdkn2a <sup>+/+</sup> _C57 | SIN.LV.SF.GFP | LIVER | X | 93643333  | + | NM_001159628 | Heph               | + |
| E-DMM59 | Cdkn2a <sup>+/+</sup> _C57 | SIN.LV.SF.GFP | LIVER | X | 95963917  | + | NM_052976    | Ophn1              | - |
| E-DMM63 | Cdkn2a <sup>+/+</sup> _C57 | SIN.LV.SF.GFP | LIVER | X | 99493364  | + | NM_027382    | Hdac8              | - |
| E-DMM52 | Cdkn2a <sup>+/+</sup> _C57 | SIN.LV.SF.GFP | LIVER | X | 100801113 | - | NM_029158    | Zcchc13            | + |
| E-DMM55 | Cdkn2a <sup>+/+</sup> _C57 | SIN.LV.SF.GFP | LIVER | X | 102277805 | - | NM_026312    | 2610029G23Rik      | + |
| E-DMM49 | Cdkn2a <sup>+/+</sup> _C57 | SIN.LV.SF.GFP | LIVER | X | 105016813 | + | NM_025921    | 2610002M06Rik      | - |
| E-DMM49 | Cdkn2a <sup>+/+</sup> _C57 | SIN.LV.SF.GFP | LIVER | X | 106145996 | + | NM_016710    | Nsbp1              | - |
| E-DMM65 | Cdkn2a <sup>+/+</sup> _C57 | SIN.LV.SF.GFP | LIVER | X | 106331489 | - | NM_019989    | Sh3bgrl            | + |
| E-DMM49 | Cdkn2a <sup>+/+</sup> _C57 | SIN.LV.SF.GFP | LIVER | X | 106386830 | + | NM_001037917 | Gm6377             | + |
| E-DMM50 | Cdkn2a <sup>+/+</sup> _C57 | SIN.LV.SF.GFP | LIVER | X | 108526973 | + | NM_025949    | Rps6ka6            | - |
| E-DMM50 | Cdkn2a <sup>+/+</sup> _C57 | SIN.LV.SF.GFP | LIVER | X | 110219459 | - | NM_018818    | Chm                | - |

|         |                            |               |       |   |           |   |              |          |   |
|---------|----------------------------|---------------|-------|---|-----------|---|--------------|----------|---|
| E-DMM52 | Cdkn2a <sup>+/+</sup> _C57 | SIN.LV.SF.GFP | LIVER | X | 113241023 | - | NM_001033471 | Cpxcr1   | + |
| E-DMM57 | Cdkn2a <sup>+/+</sup> _C57 | SIN.LV.SF.GFP | LIVER | X | 113748626 | - | NM_001033471 | Cpxcr1   | + |
| E-DMM63 | Cdkn2a <sup>+/+</sup> _C57 | SIN.LV.SF.GFP | LIVER | X | 115342977 | + | NM_001142750 | Tgif2lx2 | + |
| E-DMM48 | Cdkn2a <sup>+/+</sup> _C57 | SIN.LV.SF.GFP | LIVER | X | 115427639 | - | NM_001142750 | Tgif2lx2 | + |
| E-DMM65 | Cdkn2a <sup>+/+</sup> _C57 | SIN.LV.SF.GFP | LIVER | X | 123577666 | + | NM_001033241 | Gm382    | + |
| E-DMM57 | Cdkn2a <sup>+/+</sup> _C57 | SIN.LV.SF.GFP | LIVER | X | 126327060 | - | NM_017398    | Diap2    | + |
| E-DMM58 | Cdkn2a <sup>+/+</sup> _C57 | SIN.LV.SF.GFP | LIVER | X | 126364565 | - | NM_017398    | Diap2    | + |
| E-DMM58 | Cdkn2a <sup>+/+</sup> _C57 | SIN.LV.SF.GFP | LIVER | X | 126537944 | + | NM_017398    | Diap2    | + |
| E-DMM58 | Cdkn2a <sup>+/+</sup> _C57 | SIN.LV.SF.GFP | LIVER | X | 126683416 | + | NM_017398    | Diap2    | + |
| E-DMM58 | Cdkn2a <sup>+/+</sup> _C57 | SIN.LV.SF.GFP | LIVER | X | 130152179 | + | NM_001105245 | Pcdh19   | - |
| E-DMM52 | Cdkn2a <sup>+/+</sup> _C57 | SIN.LV.SF.GFP | LIVER | X | 130491155 | + | NM_013757    | Sytl4    | - |
| E-DMM50 | Cdkn2a <sup>+/+</sup> _C57 | SIN.LV.SF.GFP | LIVER | X | 131541491 | - | NM_175446    | Zmat1    | - |
| E-DMM50 | Cdkn2a <sup>+/+</sup> _C57 | SIN.LV.SF.GFP | LIVER | X | 133615379 | - | NM_146261    | BC031748 | + |
| E-DMM48 | Cdkn2a <sup>+/+</sup> _C57 | SIN.LV.SF.GFP | LIVER | X | 134057681 | - | NM_030688    | Il1rapl2 | + |
| E-DMM55 | Cdkn2a <sup>+/+</sup> _C57 | SIN.LV.SF.GFP | LIVER | X | 135617005 | - | NM_177920    | Serpina7 | - |
| E-DMM55 | Cdkn2a <sup>+/+</sup> _C57 | SIN.LV.SF.GFP | LIVER | X | 135723049 | - | NM_175541    | Mum111   | + |
| E-DMM63 | Cdkn2a <sup>+/+</sup> _C57 | SIN.LV.SF.GFP | LIVER | X | 136148524 | + | NM_023270    | Rnf128   | + |
| E-DMM57 | Cdkn2a <sup>+/+</sup> _C57 | SIN.LV.SF.GFP | LIVER | X | 136350763 | - | NM_016675    | Cldn2    | + |
| E-DMM52 | Cdkn2a <sup>+/+</sup> _C57 | SIN.LV.SF.GFP | LIVER | X | 139342648 | + | NM_019496    | Ammecr1  | - |
| E-DMM52 | Cdkn2a <sup>+/+</sup> _C57 | SIN.LV.SF.GFP | LIVER | X | 141912173 | + | NM_153319    | Amot     | - |
| E-DMM50 | Cdkn2a <sup>+/+</sup> _C57 | SIN.LV.SF.GFP | LIVER | X | 143878392 | + | NM_053230    | V1rb9    | + |
| E-DMM52 | Cdkn2a <sup>+/+</sup> _C57 | SIN.LV.SF.GFP | LIVER | X | 148692726 | - | NM_013668    | Kdm5c    | + |
| E-DMM52 | Cdkn2a <sup>+/+</sup> _C57 | SIN.LV.SF.GFP | LIVER | X | 149938769 | + | NM_018798    | Ubqln2   | + |
| E-DMM65 | Cdkn2a <sup>+/+</sup> _C57 | SIN.LV.SF.GFP | LIVER | X | 151721590 | - | NM_019736    | Acot9    | + |
| E-DMM52 | Cdkn2a <sup>+/+</sup> _C57 | SIN.LV.SF.GFP | LIVER | X | 154012791 | + | NM_172307    | Mbtps2   | - |
| E-DMM63 | Cdkn2a <sup>+/+</sup> _C57 | SIN.LV.SF.GFP | LIVER | X | 157973345 | - | NM_001103367 | Rai2     | + |
| E-DMM50 | Cdkn2a <sup>+/+</sup> _C57 | SIN.LV.SF.GFP | LIVER | X | 158281858 | - | NM_001081052 | Nhs      | - |
| E-DMM57 | Cdkn2a <sup>+/+</sup> _C57 | SIN.LV.SF.GFP | LIVER | X | 159201685 | + | NM_009031    | Rbbp7    | + |
| E-DMM58 | Cdkn2a <sup>+/+</sup> _C57 | SIN.LV.SF.GFP | LIVER | X | 159374244 | + | NM_018737    | Ctps2    | + |
| E-DMM48 | Cdkn2a <sup>+/+</sup> _C57 | SIN.LV.SF.GFP | LIVER | X | 160874587 | + | NM_026853    | Asb11    | + |
| E-DMM52 | Cdkn2a <sup>+/+</sup> _C57 | SIN.LV.SF.GFP | LIVER | X | 163576450 | - | NM_001101606 | Gm8817   | - |

|         |                              |               |        |   |           |   |              |          |   |
|---------|------------------------------|---------------|--------|---|-----------|---|--------------|----------|---|
| E-DMM48 | Cdkn2a <sup>+/-</sup> _C57   | SIN.LV.SF.GFP | LIVER  | X | 166153941 | + | NM_010797    | Mid1     | + |
| E-DMM52 | Cdkn2a <sup>+/-</sup> _C57   | SIN.LV.SF.GFP | LIVER  | X | 166387150 | - | NM_010797    | Mid1     | + |
| E-DMM48 | Cdkn2a <sup>+/-</sup> _C57   | SIN.LV.SF.GFP | LIVER  | X | 166406051 | - | NM_010797    | Mid1     | + |
| E-DMM65 | Cdkn2a <sup>+/-</sup> _C57   | SIN.LV.SF.GFP | LIVER  | Y | 240996    | + | NM_011419    | Kdm5d    | + |
| E-DMM65 | Cdkn2a <sup>+/-</sup> _C57   | SIN.LV.SF.GFP | LIVER  | Y | 270202    | + | NM_011419    | Kdm5d    | + |
| E-DMM59 | Cdkn2a <sup>+/-</sup> _C57   | SIN.LV.SF.GFP | LIVER  | Y | 618886    | + | NM_012008    | Ddx3y    | - |
| E-DMM52 | Cdkn2a <sup>+/-</sup> _C57   | SIN.LV.SF.GFP | LIVER  | Y | 691185    | + | NM_148943    | Usp9y    | - |
| E-DMM63 | Cdkn2a <sup>+/-</sup> _C57   | SIN.LV.SF.GFP | LIVER  | Y | 2862371   | - | NM_011253    | Rbmyl1a1 | + |
| 173     | Cdkn2a <sup>-/-</sup> _HSPCs | LV.SF.LTR     | SPLEEN | 1 | 4404313   | + | NM_011283    | Rpl      | - |
| BULK    | Cdkn2a <sup>-/-</sup> _HSPCs | LV.SF.LTR     | BULK   | 1 | 6257409   | + | NM_009826    | Rb1cc1   | + |
| 267     | Cdkn2a <sup>-/-</sup> _HSPCs | LV.SF.LTR     | BM     | 1 | 7134596   | + | NM_183028    | Pcmd1    | + |
| 226     | Cdkn2a <sup>-/-</sup> _HSPCs | LV.SF.LTR     | SPLEEN | 1 | 7524622   | + | NM_183028    | Pcmd1    | + |
| 191     | Cdkn2a <sup>-/-</sup> _HSPCs | LV.SF.LTR     | SPLEEN | 1 | 9678398   | + | NM_008651    | Mybl1    | - |
| 180     | Cdkn2a <sup>-/-</sup> _HSPCs | LV.SF.LTR     | SPLEEN | 1 | 13358142  | + | NM_001077695 | Ncoa2    | - |
| 226     | Cdkn2a <sup>-/-</sup> _HSPCs | LV.SF.LTR     | SPLEEN | 1 | 14901789  | - | NM_177781    | Trpa1    | - |
| 173     | Cdkn2a <sup>-/-</sup> _HSPCs | LV.SF.LTR     | SPLEEN | 1 | 16348645  | + | NM_001111272 | Stau2    | - |
| 180     | Cdkn2a <sup>-/-</sup> _HSPCs | LV.SF.LTR     | SPLEEN | 1 | 20899818  | - | NM_028829    | Paqr8    | + |
| 173     | Cdkn2a <sup>-/-</sup> _HSPCs | LV.SF.LTR     | SPLEEN | 1 | 21471886  | + | NM_001160139 | Kcnq5    | - |
| 173     | Cdkn2a <sup>-/-</sup> _HSPCs | LV.SF.LTR     | SPLEEN | 1 | 21702224  | + | NM_001160139 | Kcnq5    | - |
| 180     | Cdkn2a <sup>-/-</sup> _HSPCs | LV.SF.LTR     | SPLEEN | 1 | 34184983  | + | NM_133833    | Dst      | + |
| 180     | Cdkn2a <sup>-/-</sup> _HSPCs | LV.SF.LTR     | SPLEEN | 1 | 35396732  | + | NM_145516    | Plekhb2  | + |
| 184     | Cdkn2a <sup>-/-</sup> _HSPCs | LV.SF.LTR     | SPLEEN | 1 | 39613700  | - | NM_001033135 | Rnf149   | - |
| 214     | Cdkn2a <sup>-/-</sup> _HSPCs | LV.SF.LTR     | SPLEEN | 1 | 43148311  | + | NM_010212    | Fhl2     | - |
| 214     | Cdkn2a <sup>-/-</sup> _HSPCs | LV.SF.LTR     | SPLEEN | 1 | 43260610  | + | NM_010212    | Fhl2     | - |
| 214     | Cdkn2a <sup>-/-</sup> _HSPCs | LV.SF.LTR     | SPLEEN | 1 | 43933476  | + | NM_009418    | Tpp2     | + |
| 214     | Cdkn2a <sup>-/-</sup> _HSPCs | LV.SF.LTR     | SPLEEN | 1 | 44045774  | + | NM_009418    | Tpp2     | + |
| 192     | Cdkn2a <sup>-/-</sup> _HSPCs | LV.SF.LTR     | SPLEEN | 1 | 45530525  | + | NM_007737    | Col5a2   | - |
| 180     | Cdkn2a <sup>-/-</sup> _HSPCs | LV.SF.LTR     | SPLEEN | 1 | 46966253  | + | NM_172653    | Slc39a10 | - |
| 213     | Cdkn2a <sup>-/-</sup> _HSPCs | LV.SF.LTR     | SPLEEN | 1 | 51246054  | - | NM_019790    | Tmeff2   | + |
| 180     | Cdkn2a <sup>-/-</sup> _HSPCs | LV.SF.LTR     | SPLEEN | 1 | 52502910  | - | NM_008667    | Nab1     | - |
| 212     | Cdkn2a <sup>-/-</sup> _HSPCs | LV.SF.LTR     | SPLEEN | 1 | 53219150  | - | NM_153556    | Pms1     | - |



|      |                              |           |        |   |           |   |              |               |   |
|------|------------------------------|-----------|--------|---|-----------|---|--------------|---------------|---|
| 191  | Cdkn2a <sup>-/-</sup> _HSPCs | LV.SF.LTR | SPLEEN | 1 | 59025706  | - | NM_172406    | Trak2         | - |
| 180  | Cdkn2a <sup>-/-</sup> _HSPCs | LV.SF.LTR | SPLEEN | 1 | 60373978  | + | NM_173444    | Nbeal1        | + |
| 224  | Cdkn2a <sup>-/-</sup> _HSPCs | LV.SF.LTR | SPLEEN | 1 | 66158240  | + | NM_001039934 | Mtap2         | + |
| 224  | Cdkn2a <sup>-/-</sup> _HSPCs | LV.SF.LTR | SPLEEN | 1 | 66922645  | - | NM_007381    | Acadl         | - |
| 180  | Cdkn2a <sup>-/-</sup> _HSPCs | LV.SF.LTR | SPLEEN | 1 | 69015329  | - | NM_010154    | ErbB4         | - |
| 229  | Cdkn2a <sup>-/-</sup> _HSPCs | LV.SF.LTR | SPLEEN | 1 | 71122495  | + | NM_007525    | Bard1         | - |
| 214  | Cdkn2a <sup>-/-</sup> _HSPCs | LV.SF.LTR | SPLEEN | 1 | 73965254  | - | NM_027884    | Tns1          | - |
| 224  | Cdkn2a <sup>-/-</sup> _HSPCs | LV.SF.LTR | SPLEEN | 1 | 80322595  | + | NM_016716    | Cul3          | - |
| 184  | Cdkn2a <sup>-/-</sup> _HSPCs | LV.SF.LTR | SPLEEN | 1 | 80948476  | + | NM_172849    | 9430031J16Rik | + |
| 180  | Cdkn2a <sup>-/-</sup> _HSPCs | LV.SF.LTR | SPLEEN | 1 | 84747939  | - | NM_133975    | Trip12        | - |
| 173  | Cdkn2a <sup>-/-</sup> _HSPCs | LV.SF.LTR | SPLEEN | 1 | 88480559  | - | NM_008801    | Pde6d         | - |
| 173  | Cdkn2a <sup>-/-</sup> _HSPCs | LV.SF.LTR | SPLEEN | 1 | 88735100  | + | NM_153530    | Dis3l2        | + |
| 270  | Cdkn2a <sup>-/-</sup> _HSPCs | LV.SF.LTR | BM     | 1 | 99721998  | + | NM_013626    | Pam           | - |
| BULK | Cdkn2a <sup>-/-</sup> _HSPCs | LV.SF.LTR | BULK   | 1 | 99901922  | + | NM_013626    | Pam           | - |
| 213  | Cdkn2a <sup>-/-</sup> _HSPCs | LV.SF.LTR | SPLEEN | 1 | 100604666 | + | NM_013626    | Pam           | - |
| 173  | Cdkn2a <sup>-/-</sup> _HSPCs | LV.SF.LTR | SPLEEN | 1 | 103776825 | + | NM_172851    | Cntnap5b      | + |
| 182  | Cdkn2a <sup>-/-</sup> _HSPCs | LV.SF.LTR | SPLEEN | 1 | 107180491 | - | NM_001160368 | Rnf152        | - |
| 180  | Cdkn2a <sup>-/-</sup> _HSPCs | LV.SF.LTR | SPLEEN | 1 | 107487568 | + | NM_013784    | Pign          | - |
| 182  | Cdkn2a <sup>-/-</sup> _HSPCs | LV.SF.LTR | SPLEEN | 1 | 108686836 | + | NM_009190    | Vps4b         | - |
| 212  | Cdkn2a <sup>-/-</sup> _HSPCs | LV.SF.LTR | SPLEEN | 1 | 109325143 | + | NM_011111    | Serpib2       | + |
| 212  | Cdkn2a <sup>-/-</sup> _HSPCs | LV.SF.LTR | SPLEEN | 1 | 109394173 | + | NM_011111    | Serpib2       | + |
| 224  | Cdkn2a <sup>-/-</sup> _HSPCs | LV.SF.LTR | SPLEEN | 1 | 121698076 | - | NM_019933    | Ptpn4         | - |
| 226  | Cdkn2a <sup>-/-</sup> _HSPCs | LV.SF.LTR | SPLEEN | 1 | 123214638 | - | NM_133748    | Insig2        | - |
| 230  | Cdkn2a <sup>-/-</sup> _HSPCs | LV.SF.LTR | SPLEEN | 1 | 127297906 | + | NM_023735    | Actr3         | - |
| 226  | Cdkn2a <sup>-/-</sup> _HSPCs | LV.SF.LTR | SPLEEN | 1 | 131912815 | - | NM_172485    | Thsd7b        | + |
| 177  | Cdkn2a <sup>-/-</sup> _HSPCs | LV.SF.LTR | SPLEEN | 1 | 133288568 | + | NM_001081011 | Srgap2        | - |
| 173  | Cdkn2a <sup>-/-</sup> _HSPCs | LV.SF.LTR | SPLEEN | 1 | 139628228 | + | NM_001111316 | Ptprc         | - |
| 274  | Cdkn2a <sup>-/-</sup> _HSPCs | LV.SF.LTR | BM     | 1 | 139976672 | + | NM_011210    | Ptprc         | - |
| 173  | Cdkn2a <sup>-/-</sup> _HSPCs | LV.SF.LTR | SPLEEN | 1 | 141052145 | + | NM_133239    | Crb1          | - |
| 173  | Cdkn2a <sup>-/-</sup> _HSPCs | LV.SF.LTR | SPLEEN | 1 | 141132311 | + | NM_133239    | Crb1          | - |
| 191  | Cdkn2a <sup>-/-</sup> _HSPCs | LV.SF.LTR | SPLEEN | 1 | 145509108 | + | NM_145991    | Cdc73         | - |

|      |                              |           |        |   |           |   |              |          |   |
|------|------------------------------|-----------|--------|---|-----------|---|--------------|----------|---|
| 226  | Cdkn2a <sup>-/-</sup> _HSPCs | LV.SF.LTR | SPLEEN | 1 | 145860285 | + | NM_009061    | Rgs2     | - |
| 264  | Cdkn2a <sup>-/-</sup> _HSPCs | LV.SF.LTR | BM     | 1 | 146526930 | + | NM_022881    | Rgs18    | - |
| 180  | Cdkn2a <sup>-/-</sup> _HSPCs | LV.SF.LTR | SPLEEN | 1 | 154717268 | + | NM_001160257 | Smg7     | - |
| 213  | Cdkn2a <sup>-/-</sup> _HSPCs | LV.SF.LTR | SPLEEN | 1 | 161175276 | + | NM_011931    | Rfwd2    | + |
| BULK | Cdkn2a <sup>-/-</sup> _HSPCs | LV.SF.LTR | BULK   | 1 | 165233531 | - | NM_178883    | Scyl1bp1 | - |
| 177  | Cdkn2a <sup>-/-</sup> _HSPCs | LV.SF.LTR | SPLEEN | 1 | 172899731 | + | NM_001077189 | Fcgr2b   | - |
| BULK | Cdkn2a <sup>-/-</sup> _HSPCs | LV.SF.LTR | BULK   | 1 | 173996818 | + | NM_153555    | Wdr42a   | + |
| 257  | Cdkn2a <sup>-/-</sup> _HSPCs | LV.SF.LTR | BM     | 1 | 175645846 | + | NM_008329    | Ifi204   | - |
| 212  | Cdkn2a <sup>-/-</sup> _HSPCs | LV.SF.LTR | BM     | 1 | 175712030 | + | NM_008329    | Ifi204   | - |
| 184  | Cdkn2a <sup>-/-</sup> _HSPCs | LV.SF.LTR | SPLEEN | 1 | 178683397 | + | NM_001099637 | Cep170   | - |
| 173  | Cdkn2a <sup>-/-</sup> _HSPCs | LV.SF.LTR | SPLEEN | 1 | 178708896 | + | NM_001099637 | Cep170   | - |
| 214  | Cdkn2a <sup>-/-</sup> _HSPCs | LV.SF.LTR | SPLEEN | 1 | 178881184 | + | NM_029756    | Sdccag8  | + |
| 180  | Cdkn2a <sup>-/-</sup> _HSPCs | LV.SF.LTR | SPLEEN | 1 | 181768309 | + | NM_026375    | Ahctf1   | - |
| 295  | Cdkn2a <sup>-/-</sup> _HSPCs | LV.SF.LTR | SPLEEN | 1 | 184279090 | + | NM_173378    | Trp53bp2 | + |
| 229  | Cdkn2a <sup>-/-</sup> _HSPCs | LV.SF.LTR | SPLEEN | 1 | 185672366 | + | NM_022019    | Dusp10   | + |
| 212  | Cdkn2a <sup>-/-</sup> _HSPCs | LV.SF.LTR | SPLEEN | 1 | 187188256 | - | NM_029735    | Eprs     | + |
| 180  | Cdkn2a <sup>-/-</sup> _HSPCs | LV.SF.LTR | SPLEEN | 1 | 196709730 | + | NM_001111059 | Cd34     | + |
| 213  | Cdkn2a <sup>-/-</sup> _HSPCs | LV.SF.LTR | SPLEEN | 1 | 196948476 | + | NM_013499    | Cr11     | - |
| 173  | Cdkn2a <sup>-/-</sup> _HSPCs | LV.SF.LTR | SPLEEN | 2 | 3047182   | - | NM_001081161 | Fam171a1 | + |
| 230  | Cdkn2a <sup>-/-</sup> _HSPCs | LV.SF.LTR | SPLEEN | 2 | 3198129   | - | NM_008708    | Nmt2     | + |
| 191  | Cdkn2a <sup>-/-</sup> _HSPCs | LV.SF.LTR | SPLEEN | 2 | 6308992   | - | NM_181399    | Usp6nl   | + |
| 180  | Cdkn2a <sup>-/-</sup> _HSPCs | LV.SF.LTR | SPLEEN | 2 | 6348095   | - | NM_001080548 | Usp6nl   | + |
| 213  | Cdkn2a <sup>-/-</sup> _HSPCs | LV.SF.LTR | SPLEEN | 2 | 9790472   | - | NM_008091    | Gata3    | - |
| BULK | Cdkn2a <sup>-/-</sup> _HSPCs | LV.SF.LTR | BULK   | 2 | 11100586  | + | NM_008859    | Prkcq    | + |
| 173  | Cdkn2a <sup>-/-</sup> _HSPCs | LV.SF.LTR | SPLEEN | 2 | 13108540  | + | NM_009105    | Rsu1     | - |
| 180  | Cdkn2a <sup>-/-</sup> _HSPCs | LV.SF.LTR | SPLEEN | 2 | 13147705  | + | NM_009105    | Rsu1     | - |
| 191  | Cdkn2a <sup>-/-</sup> _HSPCs | LV.SF.LTR | SPLEEN | 2 | 13152909  | - | NM_009105    | Rsu1     | - |
| 180  | Cdkn2a <sup>-/-</sup> _HSPCs | LV.SF.LTR | SPLEEN | 2 | 13946068  | - | NM_001012396 | Ptpla    | - |
| BULK | Cdkn2a <sup>-/-</sup> _HSPCs | LV.SF.LTR | BULK   | 2 | 14582295  | + | NM_023116    | Cacnb2   | + |
| BULK | Cdkn2a <sup>-/-</sup> _HSPCs | LV.SF.LTR | BULK   | 2 | 14664073  | + | NM_023116    | Cacnb2   | + |
| 226  | Cdkn2a <sup>-/-</sup> _HSPCs | LV.SF.LTR | SPLEEN | 2 | 20364881  | + | NM_001081006 | Et14     | + |

|      |                              |           |        |   |           |   |              |         |   |
|------|------------------------------|-----------|--------|---|-----------|---|--------------|---------|---|
| 189  | Cdkn2a <sup>-/-</sup> _HSPCs | LV.SF.LTR | SPLEEN | 2 | 21030177  | - | NM_027728    | Enkur   | - |
| 173  | Cdkn2a <sup>-/-</sup> _HSPCs | LV.SF.LTR | SPLEEN | 2 | 34398288  | - | NM_177345    | Mapkap1 | + |
| 224  | Cdkn2a <sup>-/-</sup> _HSPCs | LV.SF.LTR | SPLEEN | 2 | 37232591  | + | NM_001100591 | Rc3h2   | - |
| 212  | Cdkn2a <sup>-/-</sup> _HSPCs | LV.SF.LTR | SPLEEN | 2 | 38031306  | + | NM_146122    | Dennd1a | - |
| 191  | Cdkn2a <sup>-/-</sup> _HSPCs | LV.SF.LTR | SPLEEN | 2 | 44365205  | - | NM_172662    | Gtdc1   | - |
| 189  | Cdkn2a <sup>-/-</sup> _HSPCs | LV.SF.LTR | SPLEEN | 2 | 44847442  | - | NM_015753    | Zeb2    | - |
| 226  | Cdkn2a <sup>-/-</sup> _HSPCs | LV.SF.LTR | SPLEEN | 2 | 46349617  | + | NM_015753    | Zeb2    | - |
| 230  | Cdkn2a <sup>-/-</sup> _HSPCs | LV.SF.LTR | SPLEEN | 2 | 46814054  | + | NM_015753    | Zeb2    | - |
| BULK | Cdkn2a <sup>-/-</sup> _HSPCs | LV.SF.LTR | BULK   | 2 | 48081542  | - | NM_007396    | Acvr2a  | + |
| 229  | Cdkn2a <sup>-/-</sup> _HSPCs | LV.SF.LTR | SPLEEN | 2 | 48771576  | + | NM_011958    | Orc4l   | + |
| 262  | Cdkn2a <sup>-/-</sup> _HSPCs | LV.SF.LTR | BM     | 2 | 52811633  | + | NM_172409    | Fmnl2   | + |
| 212  | Cdkn2a <sup>-/-</sup> _HSPCs | LV.SF.LTR | SPLEEN | 2 | 57350108  | + | NM_001145820 | Gpd2    | + |
| 173  | Cdkn2a <sup>-/-</sup> _HSPCs | LV.SF.LTR | SPLEEN | 2 | 61335505  | + | NM_011529    | Tank    | + |
| 177  | Cdkn2a <sup>-/-</sup> _HSPCs | LV.SF.LTR | SPLEEN | 2 | 63582947  | + | NM_021716    | Fign    | - |
| 191  | Cdkn2a <sup>-/-</sup> _HSPCs | LV.SF.LTR | SPLEEN | 2 | 66064527  | + | NM_001047604 | Ttc21b  | - |
| 180  | Cdkn2a <sup>-/-</sup> _HSPCs | LV.SF.LTR | SPLEEN | 2 | 74385156  | - | NM_001110209 | Lnp     | - |
| 255  | Cdkn2a <sup>-/-</sup> _HSPCs | LV.SF.LTR | BM     | 2 | 75776675  | + | NM_001081228 | Ttc30a2 | - |
| 226  | Cdkn2a <sup>-/-</sup> _HSPCs | LV.SF.LTR | SPLEEN | 2 | 77073367  | + | NM_175465    | Sestd1  | - |
| 226  | Cdkn2a <sup>-/-</sup> _HSPCs | LV.SF.LTR | SPLEEN | 2 | 78711951  | - | NM_009454    | Ube2e3  | + |
| 180  | Cdkn2a <sup>-/-</sup> _HSPCs | LV.SF.LTR | SPLEEN | 2 | 78713322  | + | NM_009454    | Ube2e3  | + |
| BULK | Cdkn2a <sup>-/-</sup> _HSPCs | LV.SF.LTR | BULK   | 2 | 79377747  | + | NM_080558    | Ssfa2   | + |
| 180  | Cdkn2a <sup>-/-</sup> _HSPCs | LV.SF.LTR | SPLEEN | 2 | 80166753  | - | NM_024181    | Dnajc10 | + |
| 182  | Cdkn2a <sup>-/-</sup> _HSPCs | LV.SF.LTR | SPLEEN | 2 | 80183515  | + | NM_024181    | Dnajc10 | + |
| 182  | Cdkn2a <sup>-/-</sup> _HSPCs | LV.SF.LTR | SPLEEN | 2 | 80489082  | - | NM_027091    | Nup35   | + |
| 180  | Cdkn2a <sup>-/-</sup> _HSPCs | LV.SF.LTR | SPLEEN | 2 | 90599845  | + | NM_018828    | Fnbp4   | + |
| 224  | Cdkn2a <sup>-/-</sup> _HSPCs | LV.SF.LTR | SPLEEN | 2 | 91041359  | - | NM_007387    | Acp2    | + |
| 182  | Cdkn2a <sup>-/-</sup> _HSPCs | LV.SF.LTR | SPLEEN | 2 | 91412805  | + | NM_029437    | Ckap5   | + |
| 230  | Cdkn2a <sup>-/-</sup> _HSPCs | LV.SF.LTR | SPLEEN | 2 | 91631628  | - | NM_001080754 | Ambra1  | + |
| 224  | Cdkn2a <sup>-/-</sup> _HSPCs | LV.SF.LTR | SPLEEN | 2 | 94530287  | + | NM_007466    | Api5    | - |
| 173  | Cdkn2a <sup>-/-</sup> _HSPCs | LV.SF.LTR | SPLEEN | 2 | 98507432  | - | NM_178725    | Lrrc4c  | + |
| 173  | Cdkn2a <sup>-/-</sup> _HSPCs | LV.SF.LTR | SPLEEN | 2 | 102192466 | - | NM_020267    | Trim44  | - |

|      |                              |           |        |   |           |   |              |               |   |
|------|------------------------------|-----------|--------|---|-----------|---|--------------|---------------|---|
| 191  | Cdkn2a <sup>-/-</sup> _HSPCs | LV.SF.LTR | SPLEEN | 2 | 104446101 | + | NM_001037326 | Cstf3         | + |
| 191  | Cdkn2a <sup>-/-</sup> _HSPCs | LV.SF.LTR | SPLEEN | 2 | 104446225 | - | NM_001037326 | Cstf3         | + |
| 180  | Cdkn2a <sup>-/-</sup> _HSPCs | LV.SF.LTR | SPLEEN | 2 | 105154978 | - | NM_001159638 | 0610012H03Rik | + |
| 180  | Cdkn2a <sup>-/-</sup> _HSPCs | LV.SF.LTR | SPLEEN | 2 | 108430934 | - | NM_029790    | Mett5d1       | - |
| 230  | Cdkn2a <sup>-/-</sup> _HSPCs | LV.SF.LTR | SPLEEN | 2 | 112194110 | - | NM_133648    | Slc12a6       | + |
| 191  | Cdkn2a <sup>-/-</sup> _HSPCs | LV.SF.LTR | SPLEEN | 2 | 112389043 | + | NM_028844    | Aven          | + |
| 180  | Cdkn2a <sup>-/-</sup> _HSPCs | LV.SF.LTR | SPLEEN | 2 | 114472756 | - | NM_025675    | Atpbd4        | - |
| 213  | Cdkn2a <sup>-/-</sup> _HSPCs | LV.SF.LTR | SPLEEN | 2 | 116992237 | - | NM_033524    | Spred1        | + |
| 224  | Cdkn2a <sup>-/-</sup> _HSPCs | LV.SF.LTR | SPLEEN | 2 | 124463300 | + | NM_172537    | Sema6d        | + |
| 173  | Cdkn2a <sup>-/-</sup> _HSPCs | LV.SF.LTR | SPLEEN | 2 | 124948012 | + | NM_010852    | Myef2         | - |
| BULK | Cdkn2a <sup>-/-</sup> _HSPCs | LV.SF.LTR | BULK   | 2 | 126619184 | - | NM_023220    | 2010106G01Rik | - |
| 182  | Cdkn2a <sup>-/-</sup> _HSPCs | LV.SF.LTR | SPLEEN | 2 | 127138739 | + | NM_139308    | Stard7        | + |
| 173  | Cdkn2a <sup>-/-</sup> _HSPCs | LV.SF.LTR | SPLEEN | 2 | 129345650 | - | NM_177653    | F830045P16Rik | - |
| 230  | Cdkn2a <sup>-/-</sup> _HSPCs | LV.SF.LTR | SPLEEN | 2 | 134834472 | - | NM_001145830 | Plcb1         | + |
| 189  | Cdkn2a <sup>-/-</sup> _HSPCs | LV.SF.LTR | SPLEEN | 2 | 138009981 | + | NM_001025431 | Btbd3         | + |
| 191  | Cdkn2a <sup>-/-</sup> _HSPCs | LV.SF.LTR | SPLEEN | 2 | 139831027 | - | NM_175225    | Tasp1         | - |
| 224  | Cdkn2a <sup>-/-</sup> _HSPCs | LV.SF.LTR | SPLEEN | 2 | 140663284 | + | NM_001013802 | MacroD2       | + |
| 226  | Cdkn2a <sup>-/-</sup> _HSPCs | LV.SF.LTR | SPLEEN | 2 | 144084868 | - | NM_024225    | Snx5          | - |
| 180  | Cdkn2a <sup>-/-</sup> _HSPCs | LV.SF.LTR | SPLEEN | 2 | 145197474 | + | NM_053195    | Slc24a3       | + |
| 224  | Cdkn2a <sup>-/-</sup> _HSPCs | LV.SF.LTR | SPLEEN | 2 | 146691393 | + | NM_001033298 | Ncrna00153    | - |
| 226  | Cdkn2a <sup>-/-</sup> _HSPCs | LV.SF.LTR | SPLEEN | 2 | 146885499 | + | NM_011917    | Xrn2          | + |
| 224  | Cdkn2a <sup>-/-</sup> _HSPCs | LV.SF.LTR | SPLEEN | 2 | 148294477 | + | NM_010740    | Cd93          | - |
| 173  | Cdkn2a <sup>-/-</sup> _HSPCs | LV.SF.LTR | SPLEEN | 2 | 155254175 | - | NM_019825    | Ncoa6         | - |
| 213  | Cdkn2a <sup>-/-</sup> _HSPCs | LV.SF.LTR | SPLEEN | 2 | 163657079 | + | NM_016873    | Wisp2         | + |
| 264  | Cdkn2a <sup>-/-</sup> _HSPCs | LV.SF.LTR | BM     | 2 | 177296167 | - |              | 0610010B08Rik | + |
| 214  | Cdkn2a <sup>-/-</sup> _HSPCs | LV.SF.LTR | SPLEEN | 2 | 180708975 | - | NM_145760    | Arfgap1       | + |
| 180  | Cdkn2a <sup>-/-</sup> _HSPCs | LV.SF.LTR | SPLEEN | 2 | 181378107 | + | NM_133701    | Prpf6         | + |
| 226  | Cdkn2a <sup>-/-</sup> _HSPCs | LV.SF.LTR | SPLEEN | 3 | 4199774   | + | NM_013920    | Hnf4g         | + |
| 184  | Cdkn2a <sup>-/-</sup> _HSPCs | LV.SF.LTR | SPLEEN | 3 | 5575548   | + | NM_008994    | Pxmp3         | - |
| 230  | Cdkn2a <sup>-/-</sup> _HSPCs | LV.SF.LTR | SPLEEN | 3 | 9536372   | + | NM_133218    | Zfp704        | - |
| 274  | Cdkn2a <sup>-/-</sup> _HSPCs | LV.SF.LTR | BM     | 3 | 10415368  | - | NM_029068    | Snx16         | - |

|      |                              |           |        |   |          |   |              |               |   |
|------|------------------------------|-----------|--------|---|----------|---|--------------|---------------|---|
| 173  | Cdkn2a <sup>-/-</sup> _HSPCs | LV.SF.LTR | SPLEEN | 3 | 14547653 | + | NM_028915    | Lrrcc1        | + |
| 230  | Cdkn2a <sup>-/-</sup> _HSPCs | LV.SF.LTR | BM     | 3 | 14569367 | + | NM_007892    | E2f5          | + |
| 212  | Cdkn2a <sup>-/-</sup> _HSPCs | LV.SF.LTR | SPLEEN | 3 | 18128914 | - | NM_007825    | Cyp7b1        | - |
| 184  | Cdkn2a <sup>-/-</sup> _HSPCs | LV.SF.LTR | SPLEEN | 3 | 18237877 | + | NM_007825    | Cyp7b1        | - |
| 177  | Cdkn2a <sup>-/-</sup> _HSPCs | LV.SF.LTR | SPLEEN | 3 | 19966939 | - | NM_009210    | Hltf          | + |
| 212  | Cdkn2a <sup>-/-</sup> _HSPCs | LV.SF.LTR | SPLEEN | 3 | 19995993 | - | NM_144959    | Hltf          | + |
| 261  | Cdkn2a <sup>-/-</sup> _HSPCs | LV.SF.LTR | BM     | 3 | 20873024 | - | NM_175086    | Agtr1b        | - |
| BULK | Cdkn2a <sup>-/-</sup> _HSPCs | LV.SF.LTR | BULK   | 3 | 28425325 | + |              | Tnik          | + |
| 212  | Cdkn2a <sup>-/-</sup> _HSPCs | LV.SF.LTR | SPLEEN | 3 | 29881587 | + | NM_007963    | Evi1          | + |
| 189  | Cdkn2a <sup>-/-</sup> _HSPCs | LV.SF.LTR | SPLEEN | 3 | 30110907 | + | NM_021442    | Mds1          | - |
| 173  | Cdkn2a <sup>-/-</sup> _HSPCs | LV.SF.LTR | SPLEEN | 3 | 33936491 | + | NM_001113188 | Fxr1          | + |
| 212  | Cdkn2a <sup>-/-</sup> _HSPCs | LV.SF.LTR | SPLEEN | 3 | 40875694 | + | NM_027558    | Pgrmc2        | - |
| 180  | Cdkn2a <sup>-/-</sup> _HSPCs | LV.SF.LTR | SPLEEN | 3 | 45422420 | - | NM_001098170 | Pcdh10        | + |
| 180  | Cdkn2a <sup>-/-</sup> _HSPCs | LV.SF.LTR | SPLEEN | 3 | 51110717 | - | NM_023502    | Elf2          | - |
| 191  | Cdkn2a <sup>-/-</sup> _HSPCs | LV.SF.LTR | SPLEEN | 3 | 51237122 | + | NM_053089    | Narg1         | - |
| 180  | Cdkn2a <sup>-/-</sup> _HSPCs | LV.SF.LTR | SPLEEN | 3 | 53274772 | + | NM_173382    | 2810046L04Rik | + |
| 180  | Cdkn2a <sup>-/-</sup> _HSPCs | LV.SF.LTR | SPLEEN | 3 | 57603663 | + | NM_011883    | Rnf13         | + |
| 180  | Cdkn2a <sup>-/-</sup> _HSPCs | LV.SF.LTR | SPLEEN | 3 | 58239996 | - | NM_001081229 | Tsc22d2       | + |
| 177  | Cdkn2a <sup>-/-</sup> _HSPCs | LV.SF.LTR | SPLEEN | 3 | 59007270 | + | NM_028808    | P2ry13        | - |
| 180  | Cdkn2a <sup>-/-</sup> _HSPCs | LV.SF.LTR | SPLEEN | 3 | 60021066 | + | NM_032400    | Sucnr1        | + |
| 180  | Cdkn2a <sup>-/-</sup> _HSPCs | LV.SF.LTR | SPLEEN | 3 | 60293320 | + | NM_020007    | Mbnl1         | + |
| 182  | Cdkn2a <sup>-/-</sup> _HSPCs | LV.SF.LTR | SPLEEN | 3 | 62289630 | - | NM_028136    | Dhx36         | - |
| 173  | Cdkn2a <sup>-/-</sup> _HSPCs | LV.SF.LTR | SPLEEN | 3 | 62453944 | - | NM_177346    | Gpr149        | - |
| 212  | Cdkn2a <sup>-/-</sup> _HSPCs | LV.SF.LTR | SPLEEN | 3 | 65127277 | - | NM_010597    | Kcnab1        | + |
| 226  | Cdkn2a <sup>-/-</sup> _HSPCs | LV.SF.LTR | SPLEEN | 3 | 65188299 | - | NM_026155    | Ssr3          | - |
| 255  | Cdkn2a <sup>-/-</sup> _HSPCs | LV.SF.LTR | BM     | 3 | 65468744 | + | NM_026155    | Ssr3          | - |
| 180  | Cdkn2a <sup>-/-</sup> _HSPCs | LV.SF.LTR | SPLEEN | 3 | 67246932 | + | NM_138591    | Gfm1          | + |
| 257  | Cdkn2a <sup>-/-</sup> _HSPCs | LV.SF.LTR | BM     | 3 | 73797155 | - | NM_009738    | bche          | - |
| 224  | Cdkn2a <sup>-/-</sup> _HSPCs | LV.SF.LTR | SPLEEN | 3 | 75445966 | - | NM_009250    | Serpini1      | + |
| 177  | Cdkn2a <sup>-/-</sup> _HSPCs | LV.SF.LTR | SPLEEN | 3 | 80125329 | + | NM_001083806 | Gria2         | - |
| 180  | Cdkn2a <sup>-/-</sup> _HSPCs | LV.SF.LTR | SPLEEN | 3 | 80908301 | - | NM_019971    | Pdgfc         | + |

|      |                              |           |        |   |           |   |              |               |   |
|------|------------------------------|-----------|--------|---|-----------|---|--------------|---------------|---|
| 262  | Cdkn2a <sup>-/-</sup> _HSPCs | LV.SF.LTR | THYMUS | 3 | 81179207  | + | NM_019971    | Pdgfc         | + |
| 191  | Cdkn2a <sup>-/-</sup> _HSPCs | LV.SF.LTR | SPLEEN | 3 | 83922582  | - | NM_029797    | Mnd1          | - |
| 230  | Cdkn2a <sup>-/-</sup> _HSPCs | LV.SF.LTR | SPLEEN | 3 | 85766871  | + | NM_001001650 | Gm1019        | - |
| 182  | Cdkn2a <sup>-/-</sup> _HSPCs | LV.SF.LTR | SPLEEN | 3 | 90158042  | + | NM_139304    | Gatad2b       | + |
| 184  | Cdkn2a <sup>-/-</sup> _HSPCs | LV.SF.LTR | SPLEEN | 3 | 95731252  | + | NM_023210    | Anp32e        | + |
| 180  | Cdkn2a <sup>-/-</sup> _HSPCs | LV.SF.LTR | SPLEEN | 3 | 95817053  | - | NM_013841    | Vps45         | - |
| 184  | Cdkn2a <sup>-/-</sup> _HSPCs | LV.SF.LTR | SPLEEN | 3 | 97862943  | + | NM_010928    | Notch2        | + |
| 214  | Cdkn2a <sup>-/-</sup> _HSPCs | LV.SF.LTR | SPLEEN | 3 | 100426235 | + | NM_010763    | Man1a2        | - |
| 173  | Cdkn2a <sup>-/-</sup> _HSPCs | LV.SF.LTR | SPLEEN | 3 | 108507529 | - | NM_029522    | Gpsm2         | - |
| 173  | Cdkn2a <sup>-/-</sup> _HSPCs | LV.SF.LTR | SPLEEN | 3 | 109087113 | + | NM_020505    | Vav3          | + |
| 226  | Cdkn2a <sup>-/-</sup> _HSPCs | LV.SF.LTR | SPLEEN | 3 | 120919265 | - | NM_178936    | Tmem56        | - |
| 214  | Cdkn2a <sup>-/-</sup> _HSPCs | LV.SF.LTR | SPLEEN | 3 | 122257771 | + | NM_001114665 | Fnbp11        | - |
| 180  | Cdkn2a <sup>-/-</sup> _HSPCs | LV.SF.LTR | SPLEEN | 3 | 132323756 | - | NM_007926    | Aimp1         | - |
| 182  | Cdkn2a <sup>-/-</sup> _HSPCs | LV.SF.LTR | BM     | 3 | 134614561 | - | XM_143529.5  | Gm421         | - |
| 226  | Cdkn2a <sup>-/-</sup> _HSPCs | LV.SF.LTR | SPLEEN | 3 | 138195966 | - | NM_007917    | Eif4e         | + |
| 184  | Cdkn2a <sup>-/-</sup> _HSPCs | LV.SF.LTR | SPLEEN | 3 | 138696535 | + | NM_001040690 | Rap1gds1      | - |
| 191  | Cdkn2a <sup>-/-</sup> _HSPCs | LV.SF.LTR | SPLEEN | 3 | 142004719 | - | NM_019809    | Pdlim5        | - |
| 191  | Cdkn2a <sup>-/-</sup> _HSPCs | LV.SF.LTR | SPLEEN | 3 | 144368252 | - | NM_019464    | Sh3glb1       | - |
| 173  | Cdkn2a <sup>-/-</sup> _HSPCs | LV.SF.LTR | SPLEEN | 3 | 144451028 | + | NM_030601    | Clea2         | - |
| 226  | Cdkn2a <sup>-/-</sup> _HSPCs | LV.SF.LTR | SPLEEN | 3 | 148557572 | - | NM_001081298 | Lphn2         | - |
| 226  | Cdkn2a <sup>-/-</sup> _HSPCs | LV.SF.LTR | SPLEEN | 3 | 151120799 | - | NM_133222    | Elt1          | + |
| 214  | Cdkn2a <sup>-/-</sup> _HSPCs | LV.SF.LTR | SPLEEN | 3 | 151238317 | - | NM_133222    | Elt1          | + |
| 257  | Cdkn2a <sup>-/-</sup> _HSPCs | LV.SF.LTR | BM     | 3 | 152228052 | + | NM_174868    | C030011O14Rik | - |
| 182  | Cdkn2a <sup>-/-</sup> _HSPCs | LV.SF.LTR | SPLEEN | 3 | 156069277 | + | NM_001039094 | Negr1         | + |
| 191  | Cdkn2a <sup>-/-</sup> _HSPCs | LV.SF.LTR | SPLEEN | 3 | 157245849 | + | NM_011196    | Ptger3        | + |
| 191  | Cdkn2a <sup>-/-</sup> _HSPCs | LV.SF.LTR | SPLEEN | 3 | 159165272 | + | NM_029523    | Depdc1a       | + |
| 189  | Cdkn2a <sup>-/-</sup> _HSPCs | LV.SF.LTR | SPLEEN | 3 | 159395490 | - | NM_026582    | Gpr177        | + |
| BULK | Cdkn2a <sup>-/-</sup> _HSPCs | LV.SF.LTR | BULK   | 4 | 3432370   | - | NM_028097    | Tmem68        | - |
| 191  | Cdkn2a <sup>-/-</sup> _HSPCs | LV.SF.LTR | SPLEEN | 4 | 3487800   | + | NM_028097    | Tmem68        | - |
| BULK | Cdkn2a <sup>-/-</sup> _HSPCs | LV.SF.LTR | BULK   | 4 | 3861558   | - | NM_019969    | Plagl1        | - |
| 180  | Cdkn2a <sup>-/-</sup> _HSPCs | LV.SF.LTR | SPLEEN | 4 | 5585043   | + | NM_173426    | Fam110b       | + |

|     |                              |           |        |   |          |   |              |               |   |
|-----|------------------------------|-----------|--------|---|----------|---|--------------|---------------|---|
| 173 | Cdkn2a <sup>-/-</sup> _HSPCs | LV.SF.LTR | SPLEEN | 4 | 11132146 | - | NM_001159595 | Ints8         | - |
| 191 | Cdkn2a <sup>-/-</sup> _HSPCs | LV.SF.LTR | SPLEEN | 4 | 11145712 | - | NM_001159595 | Ints8         | - |
| 191 | Cdkn2a <sup>-/-</sup> _HSPCs | LV.SF.LTR | SPLEEN | 4 | 12901739 | + | NM_173746    | Gml1818       | + |
| 173 | Cdkn2a <sup>-/-</sup> _HSPCs | LV.SF.LTR | SPLEEN | 4 | 14101663 | - | NM_001111026 | Runx1t1       | + |
| 214 | Cdkn2a <sup>-/-</sup> _HSPCs | LV.SF.LTR | SPLEEN | 4 | 15893188 | + | NM_013752    | Nbn           | + |
| 173 | Cdkn2a <sup>-/-</sup> _HSPCs | LV.SF.LTR | SPLEEN | 4 | 15955483 | + | NM_145950    | Osgin2        | - |
| 173 | Cdkn2a <sup>-/-</sup> _HSPCs | LV.SF.LTR | SPLEEN | 4 | 16076652 | + | NM_138952    | Ripk2         | - |
| 191 | Cdkn2a <sup>-/-</sup> _HSPCs | LV.SF.LTR | SPLEEN | 4 | 16847723 | - | NM_138952    | Ripk2         | - |
| 180 | Cdkn2a <sup>-/-</sup> _HSPCs | LV.SF.LTR | SPLEEN | 4 | 17957321 | - | NM_019724    | Mmp16         | + |
| 173 | Cdkn2a <sup>-/-</sup> _HSPCs | LV.SF.LTR | SPLEEN | 4 | 20255875 | + | NM_172987    | Nkain3        | - |
| 173 | Cdkn2a <sup>-/-</sup> _HSPCs | LV.SF.LTR | SPLEEN | 4 | 23960105 | - | NM_199467    | F730047E07Rik | - |
| 173 | Cdkn2a <sup>-/-</sup> _HSPCs | LV.SF.LTR | SPLEEN | 4 | 29428920 | - | NM_010141    | Epha7         | + |
| 226 | Cdkn2a <sup>-/-</sup> _HSPCs | LV.SF.LTR | SPLEEN | 4 | 33443632 | + | NM_011884    | Rngtt         | + |
| 226 | Cdkn2a <sup>-/-</sup> _HSPCs | LV.SF.LTR | SPLEEN | 4 | 33472462 | + | NM_011884    | Rngtt         | + |
| 224 | Cdkn2a <sup>-/-</sup> _HSPCs | LV.SF.LTR | SPLEEN | 4 | 34352976 | + | NM_001007589 | Akirin2       | + |
| 257 | Cdkn2a <sup>-/-</sup> _HSPCs | LV.SF.LTR | BM     | 4 | 39493535 | + | NM_001081095 | 1700009N14Rik | + |
| 230 | Cdkn2a <sup>-/-</sup> _HSPCs | LV.SF.LTR | SPLEEN | 4 | 44146875 | + | NM_175201    | Rnf38         | - |
| 230 | Cdkn2a <sup>-/-</sup> _HSPCs | LV.SF.LTR | BM     | 4 | 44155103 | + | NM_001038993 | Rnf38         | - |
| 191 | Cdkn2a <sup>-/-</sup> _HSPCs | LV.SF.LTR | SPLEEN | 4 | 44842549 | + | NM_138590    | Zcchc7        | + |
| 191 | Cdkn2a <sup>-/-</sup> _HSPCs | LV.SF.LTR | SPLEEN | 4 | 44842631 | - | NM_138590    | Zcchc7        | + |
| 180 | Cdkn2a <sup>-/-</sup> _HSPCs | LV.SF.LTR | SPLEEN | 4 | 46875353 | + | NM_001081141 | Gabbr2        | - |
| 191 | Cdkn2a <sup>-/-</sup> _HSPCs | LV.SF.LTR | SPLEEN | 4 | 57815534 | - | NM_001035532 | Akap2         | + |
| 191 | Cdkn2a <sup>-/-</sup> _HSPCs | LV.SF.LTR | SPLEEN | 4 | 74045082 | + | NM_144787    | Kdm4c         | + |
| 226 | Cdkn2a <sup>-/-</sup> _HSPCs | LV.SF.LTR | SPLEEN | 4 | 77041704 | + | NM_011211    | Ptprd         | - |
| 180 | Cdkn2a <sup>-/-</sup> _HSPCs | LV.SF.LTR | SPLEEN | 4 | 83001307 | - | NM_027238    | Ttc39b        | - |
| 180 | Cdkn2a <sup>-/-</sup> _HSPCs | LV.SF.LTR | SPLEEN | 4 | 84479433 | + | NM_175275    | D53005L1Rik   | + |
| 180 | Cdkn2a <sup>-/-</sup> _HSPCs | LV.SF.LTR | SPLEEN | 4 | 84654106 | + | NM_175275    | Cntln         | + |
| 173 | Cdkn2a <sup>-/-</sup> _HSPCs | LV.SF.LTR | SPLEEN | 4 | 85588656 | + | NM_029967    | Adamts11      | + |
| 173 | Cdkn2a <sup>-/-</sup> _HSPCs | LV.SF.LTR | SPLEEN | 4 | 86438211 | - | NM_001081014 | Dennd4c       | + |
| 213 | Cdkn2a <sup>-/-</sup> _HSPCs | LV.SF.LTR | SPLEEN | 4 | 87654285 | + | NM_027326    | Milt3         | - |
| 189 | Cdkn2a <sup>-/-</sup> _HSPCs | LV.SF.LTR | SPLEEN | 4 | 87850800 | + | NM_001081184 | BC057079      | + |

|      |                              |           |        |   |           |   |              |               |   |
|------|------------------------------|-----------|--------|---|-----------|---|--------------|---------------|---|
| 179  | Cdkn2a <sup>-/-</sup> _HSPCs | LV.SF.LTR | SPLEEN | 4 | 88022787  | + | NM_206870    | Ifna14        | - |
| 184  | Cdkn2a <sup>-/-</sup> _HSPCs | LV.SF.LTR | SPLEEN | 4 | 105997836 | + | NM_153565    | Pcsk9         | - |
| 180  | Cdkn2a <sup>-/-</sup> _HSPCs | LV.SF.LTR | SPLEEN | 4 | 106003117 | + | NM_153565    | Pcsk9         | - |
| 173  | Cdkn2a <sup>-/-</sup> _HSPCs | LV.SF.LTR | SPLEEN | 4 | 108008775 | + | NM_027250    | 2010305A19Rik | + |
| 189  | Cdkn2a <sup>-/-</sup> _HSPCs | LV.SF.LTR | SPLEEN | 4 | 108797755 | + | NM_133885    | Osbp19        | - |
| 230  | Cdkn2a <sup>-/-</sup> _HSPCs | LV.SF.LTR | BM     | 4 | 108802429 | + | NM_007943    | Eps15         | + |
| 230  | Cdkn2a <sup>-/-</sup> _HSPCs | LV.SF.LTR | SPLEEN | 4 | 108977102 | + | NM_007943    | Eps15         | + |
| 230  | Cdkn2a <sup>-/-</sup> _HSPCs | LV.SF.LTR | BM     | 4 | 109291240 | - | NM_007983    | Faf1          | + |
| 226  | Cdkn2a <sup>-/-</sup> _HSPCs | LV.SF.LTR | SPLEEN | 4 | 109588310 | - | NM_007983    | Faf1          | + |
| 191  | Cdkn2a <sup>-/-</sup> _HSPCs | LV.SF.LTR | SPLEEN | 4 | 117153940 | - | NM_025739    | Rnf220        | - |
| 180  | Cdkn2a <sup>-/-</sup> _HSPCs | LV.SF.LTR | SPLEEN | 4 | 123244241 | + | NM_009600    | Macf1         | - |
| 230  | Cdkn2a <sup>-/-</sup> _HSPCs | LV.SF.LTR | SPLEEN | 4 | 132202615 | - | NM_010166    | Eya3          | + |
| 182  | Cdkn2a <sup>-/-</sup> _HSPCs | LV.SF.LTR | SPLEEN | 4 | 134007455 | - | NM_019641    | Stmn1         | + |
| 182  | Cdkn2a <sup>-/-</sup> _HSPCs | LV.SF.LTR | SPLEEN | 4 | 134898397 | - | NM_001130477 | Srrm1         | - |
| 191  | Cdkn2a <sup>-/-</sup> _HSPCs | LV.SF.LTR | SPLEEN | 4 | 137742218 | - | NM_172703    | Eif4g3        | + |
| 224  | Cdkn2a <sup>-/-</sup> _HSPCs | LV.SF.LTR | BM     | 4 | 142475400 | - | NM_001081355 | Prdm2         | - |
| 224  | Cdkn2a <sup>-/-</sup> _HSPCs | LV.SF.LTR | SPLEEN | 4 | 142798616 | - | NM_001081355 | Prdm2         | - |
| 184  | Cdkn2a <sup>-/-</sup> _HSPCs | LV.SF.LTR | SPLEEN | 4 | 145740241 | + | NM_001085522 | Gml3251       | - |
| 224  | Cdkn2a <sup>-/-</sup> _HSPCs | LV.SF.LTR | SPLEEN | 4 | 148963138 | + | NM_023051    | Clstn1        | + |
| 191  | Cdkn2a <sup>-/-</sup> _HSPCs | LV.SF.LTR | SPLEEN | 4 | 149259496 | + | NM_001085492 | Rere          | + |
| 191  | Cdkn2a <sup>-/-</sup> _HSPCs | LV.SF.LTR | SPLEEN | 4 | 149789804 | + | NM_001085492 | Rere          | + |
| 191  | Cdkn2a <sup>-/-</sup> _HSPCs | LV.SF.LTR | SPLEEN | 4 | 149789928 | - | NM_001085492 | Rere          | + |
| 173  | Cdkn2a <sup>-/-</sup> _HSPCs | LV.SF.LTR | SPLEEN | 4 | 155333498 | + | NM_001039157 | Ube2j2        | + |
| 173  | Cdkn2a <sup>-/-</sup> _HSPCs | LV.SF.LTR | SPLEEN | 5 | 3770980   | - | NM_001003909 | Ankib1        | - |
| BULK | Cdkn2a <sup>-/-</sup> _HSPCs | LV.SF.LTR | BULK   | 5 | 5189514   | - | NM_011074    | Pftk1         | - |
| 212  | Cdkn2a <sup>-/-</sup> _HSPCs | LV.SF.LTR | SPLEEN | 5 | 11954704  | - | NM_001037919 | Gm6460        | + |
| 173  | Cdkn2a <sup>-/-</sup> _HSPCs | LV.SF.LTR | SPLEEN | 5 | 13574387  | + | NM_009152    | Sema3a        | + |
| 230  | Cdkn2a <sup>-/-</sup> _HSPCs | LV.SF.LTR | SPLEEN | 5 | 15773662  | + | NM_001110843 | Cacna2d1      | + |
| 192  | Cdkn2a <sup>-/-</sup> _HSPCs | LV.SF.LTR | SPLEEN | 5 | 16099640  | - | NM_010427    | Hgf           | + |
| 173  | Cdkn2a <sup>-/-</sup> _HSPCs | LV.SF.LTR | SPLEEN | 5 | 17288631  | - | NM_001159555 | Cd36          | - |
| 180  | Cdkn2a <sup>-/-</sup> _HSPCs | LV.SF.LTR | SPLEEN | 5 | 20429727  | - | NM_001080977 | Rsb1l1        | - |



|      |                              |           |        |   |          |   |              |              |   |
|------|------------------------------|-----------|--------|---|----------|---|--------------|--------------|---|
| 180  | Cdkn2a <sup>-/-</sup> _HSPCs | LV.SF.LTR | SPLEEN | 5 | 22034817 | - | NR_004442    | LOC100042049 | - |
| 192  | Cdkn2a <sup>-/-</sup> _HSPCs | LV.SF.LTR | SPLEEN | 5 | 22043722 | - | NM_011959    | Orc5l        | + |
| 177  | Cdkn2a <sup>-/-</sup> _HSPCs | LV.SF.LTR | SPLEEN | 5 | 22053886 | - | NM_011959    | Orc5l        | + |
| 180  | Cdkn2a <sup>-/-</sup> _HSPCs | LV.SF.LTR | SPLEEN | 5 | 22942104 | + | NM_009274    | Srpk2        | - |
| 180  | Cdkn2a <sup>-/-</sup> _HSPCs | LV.SF.LTR | SPLEEN | 5 | 27986093 | + | NM_010075    | Dpp6         | + |
| 173  | Cdkn2a <sup>-/-</sup> _HSPCs | LV.SF.LTR | SPLEEN | 5 | 31341604 | + | NM_177870    | Slc5a6       | - |
| 173  | Cdkn2a <sup>-/-</sup> _HSPCs | LV.SF.LTR | SPLEEN | 5 | 38462094 | + | NM_026959    | Stx18        | + |
| 224  | Cdkn2a <sup>-/-</sup> _HSPCs | LV.SF.LTR | SPLEEN | 5 | 43639538 | - | NM_175937    | Cpeb2        | + |
| 177  | Cdkn2a <sup>-/-</sup> _HSPCs | LV.SF.LTR | SPLEEN | 5 | 44274893 | + | NM_007646    | Cd38         | + |
| 180  | Cdkn2a <sup>-/-</sup> _HSPCs | LV.SF.LTR | SPLEEN | 5 | 45821413 | + | NM_024236    | Qdpr         | - |
| 192  | Cdkn2a <sup>-/-</sup> _HSPCs | LV.SF.LTR | SPLEEN | 5 | 48469638 | + | NM_178804    | Slit2        | + |
| 226  | Cdkn2a <sup>-/-</sup> _HSPCs | LV.SF.LTR | SPLEEN | 5 | 49311792 | - | NM_030265    | Kcnip4       | - |
| 212  | Cdkn2a <sup>-/-</sup> _HSPCs | LV.SF.LTR | SPLEEN | 5 | 54811479 | - | NM_001081103 | Stim2        | + |
| 173  | Cdkn2a <sup>-/-</sup> _HSPCs | LV.SF.LTR | SPLEEN | 5 | 59126696 | - | NM_001122758 | Pcdh7        | + |
| 180  | Cdkn2a <sup>-/-</sup> _HSPCs | LV.SF.LTR | SPLEEN | 5 | 63115667 | + | NM_178407    | Arap2        | - |
| BULK | Cdkn2a <sup>-/-</sup> _HSPCs | LV.SF.LTR | BULK   | 5 | 65911820 | - | NM_001081321 | Pds5a        | - |
| 180  | Cdkn2a <sup>-/-</sup> _HSPCs | LV.SF.LTR | SPLEEN | 5 | 68232297 | - | NM_001038999 | Atp8a1       | - |
| 213  | Cdkn2a <sup>-/-</sup> _HSPCs | LV.SF.LTR | SPLEEN | 5 | 68326735 | + | NM_001038999 | Atp8a1       | - |
| 212  | Cdkn2a <sup>-/-</sup> _HSPCs | LV.SF.LTR | SPLEEN | 5 | 70108793 | - | NM_001038015 | Gnpda2       | - |
| 176  | Cdkn2a <sup>-/-</sup> _HSPCs | LV.SF.LTR | BM     | 5 | 74638097 | - | NM_178672    | Scfd2        | - |
| BULK | Cdkn2a <sup>-/-</sup> _HSPCs | LV.SF.LTR | BULK   | 5 | 81384636 | - | NM_198702    | Lphn3        | + |
| 173  | Cdkn2a <sup>-/-</sup> _HSPCs | LV.SF.LTR | SPLEEN | 5 | 86223629 | - | NM_007683    | Cenpc1       | - |
| 173  | Cdkn2a <sup>-/-</sup> _HSPCs | LV.SF.LTR | SPLEEN | 5 | 86587819 | + | NM_172712    | Uba6         | - |
| 173  | Cdkn2a <sup>-/-</sup> _HSPCs | LV.SF.LTR | SPLEEN | 5 | 86587894 | - | NM_172712    | Uba6         | - |
| 173  | Cdkn2a <sup>-/-</sup> _HSPCs | LV.SF.LTR | BM     | 5 | 86869118 | + | NM_007683    | Cenpc1       | - |
| 226  | Cdkn2a <sup>-/-</sup> _HSPCs | LV.SF.LTR | SPLEEN | 5 | 87257798 | - | NM_177680    | Ythdc1       | + |
| 173  | Cdkn2a <sup>-/-</sup> _HSPCs | LV.SF.LTR | SPLEEN | 5 | 90757955 | - | NM_030886    | Ankrd17      | - |
| 224  | Cdkn2a <sup>-/-</sup> _HSPCs | LV.SF.LTR | SPLEEN | 5 | 90774102 | + | NM_030886    | Ankrd17      | - |
| 173  | Cdkn2a <sup>-/-</sup> _HSPCs | LV.SF.LTR | SPLEEN | 5 | 92376725 | - | NM_026557    | Rchy1        | - |
| 180  | Cdkn2a <sup>-/-</sup> _HSPCs | LV.SF.LTR | SPLEEN | 5 | 93703601 | + | NM_007635    | Ccng2        | + |
| 212  | Cdkn2a <sup>-/-</sup> _HSPCs | LV.SF.LTR | SPLEEN | 5 | 96566441 | - | NM_178854    | Cnot6l       | - |

|      |                              |           |        |   |           |   |              |               |   |
|------|------------------------------|-----------|--------|---|-----------|---|--------------|---------------|---|
| 226  | Cdkn2a <sup>-/-</sup> _HSPCs | LV.SF.LTR | SPLEEN | 5 | 102452806 | + | NM_172882    | Wdfy3         | - |
| 173  | Cdkn2a <sup>-/-</sup> _HSPCs | LV.SF.LTR | SPLEEN | 5 | 104141611 | - | NM_133919    | Aff1          | + |
| 182  | Cdkn2a <sup>-/-</sup> _HSPCs | LV.SF.LTR | SPLEEN | 5 | 105230710 | - | NM_001039231 | C230055K05Rik | - |
| 173  | Cdkn2a <sup>-/-</sup> _HSPCs | LV.SF.LTR | SPLEEN | 5 | 109001726 | - | NM_153569    | Gak           | - |
| BULK | Cdkn2a <sup>-/-</sup> _HSPCs | LV.SF.LTR | BULK   | 5 | 110479865 | + | NM_027922    | D5ErtD585e    | + |
| BULK | Cdkn2a <sup>-/-</sup> _HSPCs | LV.SF.LTR | BULK   | 5 | 115412161 | + | NM_175403    | 2410014A08Rik | - |
| 191  | Cdkn2a <sup>-/-</sup> _HSPCs | LV.SF.LTR | SPLEEN | 5 | 116034280 | + | NM_172719    | Gen111        | + |
| 173  | Cdkn2a <sup>-/-</sup> _HSPCs | LV.SF.LTR | SPLEEN | 5 | 122668150 | + | NM_028752    | Hvcn1         | + |
| 191  | Cdkn2a <sup>-/-</sup> _HSPCs | LV.SF.LTR | SPLEEN | 5 | 122808662 | - | NM_019780    | Vps29         | + |
| 224  | Cdkn2a <sup>-/-</sup> _HSPCs | LV.SF.LTR | SPLEEN | 5 | 134820662 | - | NM_001081464 | Gtf2ird1      | - |
| 226  | Cdkn2a <sup>-/-</sup> _HSPCs | LV.SF.LTR | SPLEEN | 5 | 148193741 | + | NM_010229    | Flt3          | - |
| 224  | Cdkn2a <sup>-/-</sup> _HSPCs | LV.SF.LTR | SPLEEN | 5 | 148326732 | - | NM_028291    | Pan3          | + |
| 274  | Cdkn2a <sup>-/-</sup> _HSPCs | LV.SF.LTR | BM     | 5 | 148829188 | + | NM_011908    | Ubl3          | - |
| 184  | Cdkn2a <sup>-/-</sup> _HSPCs | LV.SF.LTR | SPLEEN | 5 | 151423328 | - | NM_201369    | N4bp2l2       | - |
| BULK | Cdkn2a <sup>-/-</sup> _HSPCs | LV.SF.LTR | BULK   | 6 | 5240180   | + | NM_183308    | Pon2          | - |
| 180  | Cdkn2a <sup>-/-</sup> _HSPCs | LV.SF.LTR | SPLEEN | 6 | 6116948   | - | NM_015829    | Slc25a13      | - |
| BULK | Cdkn2a <sup>-/-</sup> _HSPCs | LV.SF.LTR | BULK   | 6 | 8118343   | + | NM_001037865 | Col28a1       | - |
| 230  | Cdkn2a <sup>-/-</sup> _HSPCs | LV.SF.LTR | SPLEEN | 6 | 8163594   | + | NM_145374    | Mios          | + |
| 191  | Cdkn2a <sup>-/-</sup> _HSPCs | LV.SF.LTR | SPLEEN | 6 | 8473298   | + | NM_133236    | Glcc1         | + |
| 173  | Cdkn2a <sup>-/-</sup> _HSPCs | LV.SF.LTR | SPLEEN | 6 | 10416603  | + | NM_008751    | Nxph1         | + |
| 230  | Cdkn2a <sup>-/-</sup> _HSPCs | LV.SF.LTR | SPLEEN | 6 | 11901984  | + | NM_029404    | Phf14         | + |
| 230  | Cdkn2a <sup>-/-</sup> _HSPCs | LV.SF.LTR | SPLEEN | 6 | 11902183  | - | NM_029404    | Phf14         | + |
| 226  | Cdkn2a <sup>-/-</sup> _HSPCs | LV.SF.LTR | SPLEEN | 6 | 13540477  | + | NM_028990    | Tmem168       | - |
| 177  | Cdkn2a <sup>-/-</sup> _HSPCs | LV.SF.LTR | SPLEEN | 6 | 18803488  | + | NM_133939    | Lsm8          | + |
| 173  | Cdkn2a <sup>-/-</sup> _HSPCs | LV.SF.LTR | SPLEEN | 6 | 18804152  | + | NM_133939    | Lsm8          | + |
| 213  | Cdkn2a <sup>-/-</sup> _HSPCs | LV.SF.LTR | SPLEEN | 6 | 20565908  | - | NM_019697    | Kend2         | + |
| BULK | Cdkn2a <sup>-/-</sup> _HSPCs | LV.SF.LTR | BULK   | 6 | 23594443  | - | NM_153163    | Cadps2        | - |
| 274  | Cdkn2a <sup>-/-</sup> _HSPCs | LV.SF.LTR | BM     | 6 | 24103671  | - | NM_019481    | Slc13a1       | - |
| 226  | Cdkn2a <sup>-/-</sup> _HSPCs | LV.SF.LTR | SPLEEN | 6 | 24609426  | + | NM_028459    | Wasl          | - |
| 226  | Cdkn2a <sup>-/-</sup> _HSPCs | LV.SF.LTR | SPLEEN | 6 | 25727959  | - | NM_133931    | Pot1a         | - |
| 177  | Cdkn2a <sup>-/-</sup> _HSPCs | LV.SF.LTR | SPLEEN | 6 | 28158126  | - | NM_001081678 | Zfp800        | - |

|      |                              |           |        |   |          |   |              |               |   |
|------|------------------------------|-----------|--------|---|----------|---|--------------|---------------|---|
| 173  | Cdkn2a <sup>-/-</sup> _HSPCs | LV.SF.LTR | SPLEEN | 6 | 28178491 | + | NM_001081678 | Zfp800        | - |
| BULK | Cdkn2a <sup>-/-</sup> _HSPCs | LV.SF.LTR | BULK   | 6 | 30812215 | + | NM_017478    | Copg2         | - |
| 212  | Cdkn2a <sup>-/-</sup> _HSPCs | LV.SF.LTR | SPLEEN | 6 | 39595333 | - | NM_139294    | Braf          | - |
| 214  | Cdkn2a <sup>-/-</sup> _HSPCs | LV.SF.LTR | SPLEEN | 6 | 39597026 | - | NM_139294    | Braf          | - |
| 212  | Cdkn2a <sup>-/-</sup> _HSPCs | LV.SF.LTR | BM     | 6 | 39597268 | - | NM_139294    | Braf          | - |
| 212  | Cdkn2a <sup>-/-</sup> _HSPCs | LV.SF.LTR | SPLEEN | 6 | 39597326 | - | NM_139294    | Braf          | - |
| BULK | Cdkn2a <sup>-/-</sup> _HSPCs | LV.SF.LTR | BULK   | 6 | 40313251 | - | NM_023538    | Agk           | - |
| 226  | Cdkn2a <sup>-/-</sup> _HSPCs | LV.SF.LTR | SPLEEN | 6 | 41146628 | - | NM_011646    | Try4          | + |
| 214  | Cdkn2a <sup>-/-</sup> _HSPCs | LV.SF.LTR | SPLEEN | 6 | 41516723 | - | NM_001146351 | Ephb6         | + |
| BULK | Cdkn2a <sup>-/-</sup> _HSPCs | LV.SF.LTR | BULK   | 6 | 43357739 | - | NM_013861    | Tpk1          | - |
| 189  | Cdkn2a <sup>-/-</sup> _HSPCs | LV.SF.LTR | SPLEEN | 6 | 43533751 | + | NM_013861    | Tpk1          | - |
| 213  | Cdkn2a <sup>-/-</sup> _HSPCs | LV.SF.LTR | SPLEEN | 6 | 43645017 | + | NM_013861    | Tpk1          | - |
| 212  | Cdkn2a <sup>-/-</sup> _HSPCs | LV.SF.LTR | SPLEEN | 6 | 43645022 | + | NM_013861    | Tpk1          | - |
| 180  | Cdkn2a <sup>-/-</sup> _HSPCs | LV.SF.LTR | SPLEEN | 6 | 45272509 | + | NM_001004357 | Cntnap2       | + |
| 270  | Cdkn2a <sup>-/-</sup> _HSPCs | LV.SF.LTR | BM     | 6 | 45639721 | - | NM_001004357 | Cntnap2       | + |
| 212  | Cdkn2a <sup>-/-</sup> _HSPCs | LV.SF.LTR | SPLEEN | 6 | 46090715 | + | NM_001004357 | Cntnap2       | + |
| 214  | Cdkn2a <sup>-/-</sup> _HSPCs | LV.SF.LTR | SPLEEN | 6 | 48655753 | + | NM_153175    | Gimap6        | - |
| 173  | Cdkn2a <sup>-/-</sup> _HSPCs | LV.SF.LTR | SPLEEN | 6 | 51928433 | + | NM_018773    | Skap2         | - |
| BULK | Cdkn2a <sup>-/-</sup> _HSPCs | LV.SF.LTR | BULK   | 6 | 53429346 | + | NM_172728    | Creb5         | + |
| 259  | Cdkn2a <sup>-/-</sup> _HSPCs | LV.SF.LTR | THYMUS | 6 | 56651316 | - | XM_132538.6  | 5830411G16Rik | + |
| BULK | Cdkn2a <sup>-/-</sup> _HSPCs | LV.SF.LTR | BULK   | 6 | 56831923 | - | NM_026004    | Nt5c3         | - |
| 224  | Cdkn2a <sup>-/-</sup> _HSPCs | LV.SF.LTR | SPLEEN | 6 | 61327653 | - | NM_009221    | Snca          | - |
| BULK | Cdkn2a <sup>-/-</sup> _HSPCs | LV.SF.LTR | BULK   | 6 | 66017633 | + | NM_027547    | Prdm5         | + |
| 230  | Cdkn2a <sup>-/-</sup> _HSPCs | LV.SF.LTR | SPLEEN | 6 | 70804837 | + | NM_010121    | Eif2ak3       | + |
| 192  | Cdkn2a <sup>-/-</sup> _HSPCs | LV.SF.LTR | SPLEEN | 6 | 73752780 | - | NM_025737    | 4931417E11Rik | - |
| 212  | Cdkn2a <sup>-/-</sup> _HSPCs | LV.SF.LTR | SPLEEN | 6 | 80271449 | + | NM_178731    | Lrrtm4        | + |
| 177  | Cdkn2a <sup>-/-</sup> _HSPCs | LV.SF.LTR | SPLEEN | 6 | 80534163 | - | NM_178731    | Lrrtm4        | + |
| 294  | Cdkn2a <sup>-/-</sup> _HSPCs | LV.SF.LTR | THYMUS | 6 | 82981371 | - | NM_033079    | D6Mm5e        | + |
| 180  | Cdkn2a <sup>-/-</sup> _HSPCs | LV.SF.LTR | SPLEEN | 6 | 97074218 | - | NM_175313    | A130022J15Rik | + |
| 180  | Cdkn2a <sup>-/-</sup> _HSPCs | LV.SF.LTR | SPLEEN | 6 | 99289436 | - | NM_053202    | Foxp1         | - |
| 173  | Cdkn2a <sup>-/-</sup> _HSPCs | LV.SF.LTR | SPLEEN | 6 | 99577041 | - | NM_025829    | Eif4e3        | - |

|      |                              |           |        |   |           |   |              |          |   |
|------|------------------------------|-----------|--------|---|-----------|---|--------------|----------|---|
| 274  | Cdkn2a <sup>-/-</sup> _HSPCs | LV.SF.LTR | BM     | 6 | 108405127 | - | NM_010585    | Itrp1    | + |
| 191  | Cdkn2a <sup>-/-</sup> _HSPCs | LV.SF.LTR | SPLEEN | 6 | 134899089 | - | NM_009875    | Cdkn1b   | + |
| 226  | Cdkn2a <sup>-/-</sup> _HSPCs | LV.SF.LTR | SPLEEN | 6 | 137488805 | + | NM_007945    | Eps8     | - |
| 226  | Cdkn2a <sup>-/-</sup> _HSPCs | LV.SF.LTR | SPLEEN | 6 | 137772085 | + | NM_172733    | Dera     | + |
| 230  | Cdkn2a <sup>-/-</sup> _HSPCs | LV.SF.LTR | SPLEEN | 6 | 142872171 | + | NM_011374    | St8sia1  | - |
| 180  | Cdkn2a <sup>-/-</sup> _HSPCs | LV.SF.LTR | SPLEEN | 6 | 145050775 | + | NM_008511    | Lrmp     | + |
| BULK | Cdkn2a <sup>-/-</sup> _HSPCs | LV.SF.LTR | BULK   | 6 | 146738693 | - | NM_172734    | Stk38l   | + |
| 180  | Cdkn2a <sup>-/-</sup> _HSPCs | LV.SF.LTR | SPLEEN | 6 | 148146347 | - | NM_026355    | Ergic2   | - |
| 230  | Cdkn2a <sup>-/-</sup> _HSPCs | LV.SF.LTR | SPLEEN | 6 | 148767023 | - | NM_001081113 | Ipo8     | - |
| 189  | Cdkn2a <sup>-/-</sup> _HSPCs | LV.SF.LTR | SPLEEN | 7 | 4627380   | + | NM_024172    | Hspbp1   | - |
| BULK | Cdkn2a <sup>-/-</sup> _HSPCs | LV.SF.LTR | BULK   | 7 | 5994799   | - | NM_175247    | Zfp28    | + |
| 213  | Cdkn2a <sup>-/-</sup> _HSPCs | LV.SF.LTR | SPLEEN | 7 | 6266534   | - | NM_001033249 | Zfp583   | - |
| 189  | Cdkn2a <sup>-/-</sup> _HSPCs | LV.SF.LTR | SPLEEN | 7 | 13928145  | + | NM_001004762 | Pla2g4c  | + |
| 212  | Cdkn2a <sup>-/-</sup> _HSPCs | LV.SF.LTR | SPLEEN | 7 | 19429466  | + | NM_153760    | Mill2    | + |
| 230  | Cdkn2a <sup>-/-</sup> _HSPCs | LV.SF.LTR | SPLEEN | 7 | 30637641  | + | NM_173738    | BC027344 | - |
| 189  | Cdkn2a <sup>-/-</sup> _HSPCs | LV.SF.LTR | SPLEEN | 7 | 31799674  | + | NM_001111073 | Fxyd5    | - |
| 189  | Cdkn2a <sup>-/-</sup> _HSPCs | LV.SF.LTR | SPLEEN | 7 | 31799705  | - | NM_001111073 | Fxyd5    | - |
| 189  | Cdkn2a <sup>-/-</sup> _HSPCs | LV.SF.LTR | SPLEEN | 7 | 31799717  | - | NM_001111073 | Fxyd5    | - |
| 191  | Cdkn2a <sup>-/-</sup> _HSPCs | LV.SF.LTR | SPLEEN | 7 | 46818241  | - | NM_001004139 | Zfp619   | + |
| 226  | Cdkn2a <sup>-/-</sup> _HSPCs | LV.SF.LTR | SPLEEN | 7 | 50833563  | + | NM_001008549 | BC043301 | - |
| 275  | Cdkn2a <sup>-/-</sup> _HSPCs | LV.SF.LTR | THYMUS | 7 | 51597959  | + | NM_080853    | Slc17a6  | + |
| 184  | Cdkn2a <sup>-/-</sup> _HSPCs | LV.SF.LTR | SPLEEN | 7 | 53145633  | + | NM_021482    | Syngr4   | - |
| BULK | Cdkn2a <sup>-/-</sup> _HSPCs | LV.SF.LTR | BULK   | 7 | 55755739  | + | NM_011370    | Cyfip1   | + |
| 214  | Cdkn2a <sup>-/-</sup> _HSPCs | LV.SF.LTR | SPLEEN | 7 | 56060230  | + | NM_028031    | Zdhhc13  | + |
| 191  | Cdkn2a <sup>-/-</sup> _HSPCs | LV.SF.LTR | SPLEEN | 7 | 59257885  | - | NR_027704    | Svip     | - |
| 191  | Cdkn2a <sup>-/-</sup> _HSPCs | LV.SF.LTR | SPLEEN | 7 | 61948562  | + | NM_178705    | Luzp2    | + |
| 226  | Cdkn2a <sup>-/-</sup> _HSPCs | LV.SF.LTR | SPLEEN | 7 | 62099651  | - | NM_178705    | Luzp2    | + |
| 180  | Cdkn2a <sup>-/-</sup> _HSPCs | LV.SF.LTR | SPLEEN | 7 | 62349078  | - | NM_178705    | Luzp2    | + |
| 224  | Cdkn2a <sup>-/-</sup> _HSPCs | LV.SF.LTR | SPLEEN | 7 | 63356224  | + | NM_010418    | Herc2    | + |
| 180  | Cdkn2a <sup>-/-</sup> _HSPCs | LV.SF.LTR | SPLEEN | 7 | 63424411  | - | NM_010418    | Herc2    | + |
| 224  | Cdkn2a <sup>-/-</sup> _HSPCs | LV.SF.LTR | SPLEEN | 7 | 66558505  | + | NM_001033962 | Ube3a    | + |

|      |                              |           |        |   |           |   |              |          |   |
|------|------------------------------|-----------|--------|---|-----------|---|--------------|----------|---|
| BULK | Cdkn2a <sup>-/-</sup> _HSPCs | LV.SF.LTR | BULK   | 7 | 68617255  | + | NM_001042592 | Arrdc4   | - |
| 173  | Cdkn2a <sup>-/-</sup> _HSPCs | LV.SF.LTR | SPLEEN | 7 | 71046727  | - | NM_021366    | Klf13    | - |
| 180  | Cdkn2a <sup>-/-</sup> _HSPCs | LV.SF.LTR | SPLEEN | 7 | 74438275  | + | NM_001033713 | Mef2a    | - |
| BULK | Cdkn2a <sup>-/-</sup> _HSPCs | LV.SF.LTR | BULK   | 7 | 79921956  | + | NM_175433    | Zfp710   | + |
| 226  | Cdkn2a <sup>-/-</sup> _HSPCs | LV.SF.LTR | SPLEEN | 7 | 82707475  | + | NM_029332    | Akap13   | + |
| 180  | Cdkn2a <sup>-/-</sup> _HSPCs | LV.SF.LTR | SPLEEN | 7 | 91832492  | - | NM_022985    | Zfand6   | - |
| BULK | Cdkn2a <sup>-/-</sup> _HSPCs | LV.SF.LTR | BULK   | 7 | 97067879  | + | NM_010248    | Gab2     | + |
| 230  | Cdkn2a <sup>-/-</sup> _HSPCs | LV.SF.LTR | SPLEEN | 7 | 97288269  | - | NM_146194    | Picalm   | + |
| 180  | Cdkn2a <sup>-/-</sup> _HSPCs | LV.SF.LTR | SPLEEN | 7 | 99811776  | + | NM_029078    | Pcf11    | - |
| BULK | Cdkn2a <sup>-/-</sup> _HSPCs | LV.SF.LTR | BULK   | 7 | 100337062 | - | NM_001017985 | AU020772 | + |
| 191  | Cdkn2a <sup>-/-</sup> _HSPCs | LV.SF.LTR | SPLEEN | 7 | 101569532 | - | NM_021427    | Fam181b  | + |
| BULK | Cdkn2a <sup>-/-</sup> _HSPCs | LV.SF.LTR | BULK   | 7 | 106458602 | + | NM_146453    | Olfr693  | - |
| 173  | Cdkn2a <sup>-/-</sup> _HSPCs | LV.SF.LTR | SPLEEN | 7 | 107934358 | - | NM_178764    | Fam168a  | + |
| 173  | Cdkn2a <sup>-/-</sup> _HSPCs | LV.SF.LTR | SPLEEN | 7 | 108404506 | + | NM_001146010 | Fchsd2   | + |
| 226  | Cdkn2a <sup>-/-</sup> _HSPCs | LV.SF.LTR | SPLEEN | 7 | 109102087 | + | NM_133947    | Numa1    | + |
| BULK | Cdkn2a <sup>-/-</sup> _HSPCs | LV.SF.LTR | BULK   | 7 | 111850802 | - | NM_133758    | Usp47    | + |
| 212  | Cdkn2a <sup>-/-</sup> _HSPCs | LV.SF.LTR | SPLEEN | 7 | 112288785 | + | NM_147045    | Olfr683  | - |
| 182  | Cdkn2a <sup>-/-</sup> _HSPCs | LV.SF.LTR | SPLEEN | 7 | 118234217 | + | NM_001040131 | Eif4g2   | - |
| 180  | Cdkn2a <sup>-/-</sup> _HSPCs | LV.SF.LTR | SPLEEN | 7 | 121393427 | + | NM_033370    | Copb1    | - |
| 173  | Cdkn2a <sup>-/-</sup> _HSPCs | LV.SF.LTR | SPLEEN | 7 | 127785560 | + | NM_025899    | Uqcr2    | + |
| 184  | Cdkn2a <sup>-/-</sup> _HSPCs | LV.SF.LTR | SPLEEN | 7 | 128795167 | - | NM_001033173 | Usp31    | - |
| 226  | Cdkn2a <sup>-/-</sup> _HSPCs | LV.SF.LTR | SPLEEN | 7 | 140214005 | - | NM_009980    | Ctbp2    | - |
| BULK | Cdkn2a <sup>-/-</sup> _HSPCs | LV.SF.LTR | BULK   | 7 | 140826392 | - | NM_026820    | Ifitm1   | + |
| 173  | Cdkn2a <sup>-/-</sup> _HSPCs | LV.SF.LTR | SPLEEN | 7 | 150257038 | - | NM_001115085 | Tssc4    | + |
| 212  | Cdkn2a <sup>-/-</sup> _HSPCs | LV.SF.LTR | SPLEEN | 8 | 3252954   | - | NM_010568    | Insr     | - |
| 212  | Cdkn2a <sup>-/-</sup> _HSPCs | LV.SF.LTR | SPLEEN | 8 | 3311654   | + | NM_010568    | Insr     | - |
| 226  | Cdkn2a <sup>-/-</sup> _HSPCs | LV.SF.LTR | SPLEEN | 8 | 6056533   | - | NM_011388    | Slc10a2  | - |
| 173  | Cdkn2a <sup>-/-</sup> _HSPCs | LV.SF.LTR | SPLEEN | 8 | 6134439   | - | NM_011388    | Slc10a2  | - |
| 182  | Cdkn2a <sup>-/-</sup> _HSPCs | LV.SF.LTR | SPLEEN | 8 | 13872523  | - | NM_181854    | Zfp828   | + |
| 184  | Cdkn2a <sup>-/-</sup> _HSPCs | LV.SF.LTR | SPLEEN | 8 | 18635273  | + | NM_173189    | Mcph1    | + |
| 180  | Cdkn2a <sup>-/-</sup> _HSPCs | LV.SF.LTR | SPLEEN | 8 | 36679827  | + | NM_001081279 | Mfhas1   | + |

|      |                              |           |        |   |           |   |              |          |   |
|------|------------------------------|-----------|--------|---|-----------|---|--------------|----------|---|
| 258  | Cdkn2a <sup>-/-</sup> _HSPCs | LV.SF.LTR | BM     | 8 | 36960129  | + | NM_026067    | Thex1    | - |
| BULK | Cdkn2a <sup>-/-</sup> _HSPCs | LV.SF.LTR | BULK   | 8 | 37610989  | - | NM_172911    | D8Ert82e | + |
| 180  | Cdkn2a <sup>-/-</sup> _HSPCs | LV.SF.LTR | SPLEEN | 8 | 40997030  | - | NM_001113326 | Msr1     | - |
| 212  | Cdkn2a <sup>-/-</sup> _HSPCs | LV.SF.LTR | SPLEEN | 8 | 42391911  | - | NM_023662    | Pcm1     | + |
| 191  | Cdkn2a <sup>-/-</sup> _HSPCs | LV.SF.LTR | SPLEEN | 8 | 46988867  | + | NM_016798    | Pdlim3   | + |
| 173  | Cdkn2a <sup>-/-</sup> _HSPCs | LV.SF.LTR | SPLEEN | 8 | 47975368  | + | NM_008391    | Irf2     | + |
| 192  | Cdkn2a <sup>-/-</sup> _HSPCs | LV.SF.LTR | SPLEEN | 8 | 49210955  | + | NM_001161515 | Dctd     | + |
| 180  | Cdkn2a <sup>-/-</sup> _HSPCs | LV.SF.LTR | SPLEEN | 8 | 55524230  | - | NM_029701    | Spes3    | - |
| 226  | Cdkn2a <sup>-/-</sup> _HSPCs | LV.SF.LTR | SPLEEN | 8 | 64408840  | + | NM_001081215 | Ddx60    | + |
| 230  | Cdkn2a <sup>-/-</sup> _HSPCs | LV.SF.LTR | SPLEEN | 8 | 64488621  | - | NM_001081215 | Ddx60    | + |
| 230  | Cdkn2a <sup>-/-</sup> _HSPCs | LV.SF.LTR | BM     | 8 | 64901967  | - | NM_001081215 | BC013672 | + |
| 191  | Cdkn2a <sup>-/-</sup> _HSPCs | LV.SF.LTR | SPLEEN | 8 | 69389428  | - | NM_010934    | Npy1r    | + |
| 213  | Cdkn2a <sup>-/-</sup> _HSPCs | LV.SF.LTR | SPLEEN | 8 | 69394945  | - | NM_010934    | Npy1r    | + |
| 213  | Cdkn2a <sup>-/-</sup> _HSPCs | LV.SF.LTR | THYMUS | 8 | 69800035  | - | XM_134209.7  | BC053440 | + |
| 180  | Cdkn2a <sup>-/-</sup> _HSPCs | LV.SF.LTR | SPLEEN | 8 | 72473059  | - | NM_001113346 | Gatad2a  | - |
| BULK | Cdkn2a <sup>-/-</sup> _HSPCs | LV.SF.LTR | BULK   | 8 | 73606542  | - | NM_015816    | Lsm4     | + |
| BULK | Cdkn2a <sup>-/-</sup> _HSPCs | LV.SF.LTR | BULK   | 8 | 74841353  | + | NM_133358    | Zfp617   | + |
| 189  | Cdkn2a <sup>-/-</sup> _HSPCs | LV.SF.LTR | SPLEEN | 8 | 75824036  | + | NM_010687    | Large    | - |
| 180  | Cdkn2a <sup>-/-</sup> _HSPCs | LV.SF.LTR | SPLEEN | 8 | 80024665  | + | NM_030113    | Arhgap10 | - |
| 180  | Cdkn2a <sup>-/-</sup> _HSPCs | LV.SF.LTR | SPLEEN | 8 | 84163612  | - | NM_001024617 | Inpp4b   | + |
| 191  | Cdkn2a <sup>-/-</sup> _HSPCs | LV.SF.LTR | SPLEEN | 8 | 84509665  | + | NM_001024617 | Inpp4b   | + |
| 224  | Cdkn2a <sup>-/-</sup> _HSPCs | LV.SF.LTR | SPLEEN | 8 | 87786713  | - | NM_022997    | Vps35    | - |
| 229  | Cdkn2a <sup>-/-</sup> _HSPCs | LV.SF.LTR | SPLEEN | 8 | 87794937  | - | NM_022997    | Vps35    | - |
| 226  | Cdkn2a <sup>-/-</sup> _HSPCs | LV.SF.LTR | SPLEEN | 8 | 98275970  | + | NM_153164    | Cnot1    | - |
| 226  | Cdkn2a <sup>-/-</sup> _HSPCs | LV.SF.LTR | SPLEEN | 8 | 105854450 | + | NM_009866    | Cdh11    | - |
| 189  | Cdkn2a <sup>-/-</sup> _HSPCs | LV.SF.LTR | SPLEEN | 8 | 109234958 | - | NM_173037    | Tmco7    | + |
| 173  | Cdkn2a <sup>-/-</sup> _HSPCs | LV.SF.LTR | SPLEEN | 8 | 109844844 | + | NM_018823    | Nfat5    | + |
| 191  | Cdkn2a <sup>-/-</sup> _HSPCs | LV.SF.LTR | SPLEEN | 8 | 109867970 | - | NM_018823    | Nfat5    | + |
| 213  | Cdkn2a <sup>-/-</sup> _HSPCs | LV.SF.LTR | SPLEEN | 8 | 113545524 | - | NM_172284    | Ddx19b   | - |
| 226  | Cdkn2a <sup>-/-</sup> _HSPCs | LV.SF.LTR | SPLEEN | 8 | 119458935 | + | NM_028131    | Cenpn    | + |
| 226  | Cdkn2a <sup>-/-</sup> _HSPCs | LV.SF.LTR | SPLEEN | 8 | 124871174 | - | NM_133202    | Trhr2    | - |

|      |                              |           |        |   |           |   |              |               |      |
|------|------------------------------|-----------|--------|---|-----------|---|--------------|---------------|------|
| 271  | Cdkn2a <sup>-/-</sup> _HSPCs | LV.SF.LTR | BM     | 8 | 125859454 | - | NM_001081379 | Ankrd11       | -    |
| 191  | Cdkn2a <sup>-/-</sup> _HSPCs | LV.SF.LTR | SPLEEN | 8 | 130942824 | - | NM_008737    | Nrp1          | +    |
| 173  | Cdkn2a <sup>-/-</sup> _HSPCs | LV.SF.LTR | SPLEEN | 8 | 131254641 | + | NM_010578    | Itgb1         | +    |
| 212  | Cdkn2a <sup>-/-</sup> _HSPCs | LV.SF.LTR | SPLEEN | 9 | 8810092   | - | NM_008829    | Pgr           | +    |
| 224  | Cdkn2a <sup>-/-</sup> _HSPCs | LV.SF.LTR | SPLEEN | 9 | 11209184  | + | NM_001033359 | Cntn5         | -    |
| 189  | Cdkn2a <sup>-/-</sup> _HSPCs | LV.SF.LTR | SPLEEN | 9 | 13390396  | - | NM_001013813 | Maml2         | +    |
| 192  | Cdkn2a <sup>-/-</sup> _HSPCs | LV.SF.LTR | SPLEEN | 9 | 14223059  | - | NM_028013    | Endod1        | -    |
| 226  | Cdkn2a <sup>-/-</sup> _HSPCs | LV.SF.LTR | SPLEEN | 9 | 20910423  | - | NM_018793    | Tyk2          | -    |
| 173  | Cdkn2a <sup>-/-</sup> _HSPCs | LV.SF.LTR | SPLEEN | 9 | 25092201  | - | NM_009859    | 7-Sep         | #N/D |
| 177  | Cdkn2a <sup>-/-</sup> _HSPCs | LV.SF.LTR | SPLEEN | 9 | 25108379  | + | NM_009859    | 7-Sep         | #N/D |
| 173  | Cdkn2a <sup>-/-</sup> _HSPCs | LV.SF.LTR | SPLEEN | 9 | 26848913  | - | NM_178113    | Ncapd3        | +    |
| BULK | Cdkn2a <sup>-/-</sup> _HSPCs | LV.SF.LTR | BULK   | 9 | 28403006  | - | NM_177906    | Opcml         | +    |
| 177  | Cdkn2a <sup>-/-</sup> _HSPCs | LV.SF.LTR | SPLEEN | 9 | 32258370  | + | NM_008026    | Fli1          | -    |
| 224  | Cdkn2a <sup>-/-</sup> _HSPCs | LV.SF.LTR | SPLEEN | 9 | 35068530  | + | NM_194257    | Fam118b       | -    |
| 214  | Cdkn2a <sup>-/-</sup> _HSPCs | LV.SF.LTR | SPLEEN | 9 | 41930692  | - | NM_011436    | Sorl1         | -    |
| 213  | Cdkn2a <sup>-/-</sup> _HSPCs | LV.SF.LTR | BM     | 9 | 50349650  | - | NM_025848    | sdhd          | -    |
| 177  | Cdkn2a <sup>-/-</sup> _HSPCs | LV.SF.LTR | SPLEEN | 9 | 59180708  | + | NM_175325    | Bbs4          | -    |
| 173  | Cdkn2a <sup>-/-</sup> _HSPCs | LV.SF.LTR | SPLEEN | 9 | 65949273  | - | NM_019727    | Snx1          | -    |
| 189  | Cdkn2a <sup>-/-</sup> _HSPCs | LV.SF.LTR | SPLEEN | 9 | 70192055  | - | NM_181072    | Myo1e         | +    |
| 182  | Cdkn2a <sup>-/-</sup> _HSPCs | LV.SF.LTR | SPLEEN | 9 | 70486957  | - | NM_172772    | B230380D07Rik | +    |
| 224  | Cdkn2a <sup>-/-</sup> _HSPCs | LV.SF.LTR | SPLEEN | 9 | 76744859  | - | NM_012033    | Tinag         | -    |
| 224  | Cdkn2a <sup>-/-</sup> _HSPCs | LV.SF.LTR | SPLEEN | 9 | 79637848  | + | NM_133718    | Tmem30a       | -    |
| 180  | Cdkn2a <sup>-/-</sup> _HSPCs | LV.SF.LTR | SPLEEN | 9 | 85492977  | + | NM_001081282 | Ibtk          | -    |
| BULK | Cdkn2a <sup>-/-</sup> _HSPCs | LV.SF.LTR | BULK   | 9 | 85534672  | + | NM_001081282 | Ibtk          | -    |
| 182  | Cdkn2a <sup>-/-</sup> _HSPCs | LV.SF.LTR | SPLEEN | 9 | 87122665  | - | NM_199316    | 4922501C03Rik | -    |
| 191  | Cdkn2a <sup>-/-</sup> _HSPCs | LV.SF.LTR | SPLEEN | 9 | 92153701  | + | NM_011636    | Plscr1        | +    |
| BULK | Cdkn2a <sup>-/-</sup> _HSPCs | LV.SF.LTR | BULK   | 9 | 92388029  | - | NM_011961    | Plod2         | +    |
| BULK | Cdkn2a <sup>-/-</sup> _HSPCs | LV.SF.LTR | BULK   | 9 | 94540155  | - | NM_177909    | Slc9a9        | +    |
| BULK | Cdkn2a <sup>-/-</sup> _HSPCs | LV.SF.LTR | BULK   | 9 | 108212000 | - | NM_011678    | Usp4          | +    |
| 191  | Cdkn2a <sup>-/-</sup> _HSPCs | LV.SF.LTR | SPLEEN | 9 | 114604774 | + | NM_146229    | Dync1li1      | +    |
| 224  | Cdkn2a <sup>-/-</sup> _HSPCs | LV.SF.LTR | SPLEEN | 9 | 122869236 | + | NM_010620    | Kif15         | +    |

|     |                              |           |        |    |           |   |              |               |   |
|-----|------------------------------|-----------|--------|----|-----------|---|--------------|---------------|---|
| 212 | Cdkn2a <sup>-/-</sup> _HSPCs | LV.SF.LTR | SPLEEN | 9  | 123052728 | + | NM_011606    | Clec3b        | + |
| 173 | Cdkn2a <sup>-/-</sup> _HSPCs | LV.SF.LTR | SPLEEN | 9  | 123368426 | - | NM_153168    | Lars2         | + |
| 212 | Cdkn2a <sup>-/-</sup> _HSPCs | LV.SF.LTR | SPLEEN | 10 | 3048721   | + | NM_172546    | Cnksr3        | + |
| 224 | Cdkn2a <sup>-/-</sup> _HSPCs | LV.SF.LTR | SPLEEN | 10 | 6220890   | + | NM_172308    | Mthfd11       | - |
| 180 | Cdkn2a <sup>-/-</sup> _HSPCs | LV.SF.LTR | SPLEEN | 10 | 7843812   | - | NM_177387    | Ust           | - |
| 184 | Cdkn2a <sup>-/-</sup> _HSPCs | LV.SF.LTR | SPLEEN | 10 | 10875567  | - | NM_001077707 | Shprh         | + |
| 173 | Cdkn2a <sup>-/-</sup> _HSPCs | LV.SF.LTR | SPLEEN | 10 | 12323047  | - | NM_011682    | Utrn          | - |
| 173 | Cdkn2a <sup>-/-</sup> _HSPCs | LV.SF.LTR | SPLEEN | 10 | 12352654  | - | NM_011682    | Utrn          | - |
| 213 | Cdkn2a <sup>-/-</sup> _HSPCs | LV.SF.LTR | SPLEEN | 10 | 14692469  | - | NM_008703    | Nmbr          | + |
| 226 | Cdkn2a <sup>-/-</sup> _HSPCs | LV.SF.LTR | SPLEEN | 10 | 16784336  | - | NM_010828    | Cited2        | + |
| 180 | Cdkn2a <sup>-/-</sup> _HSPCs | LV.SF.LTR | SPLEEN | 10 | 17146764  | + | NM_010828    | Cited2        | + |
| 180 | Cdkn2a <sup>-/-</sup> _HSPCs | LV.SF.LTR | SPLEEN | 10 | 17146858  | - | NM_010828    | Cited2        | + |
| 213 | Cdkn2a <sup>-/-</sup> _HSPCs | LV.SF.LTR | SPLEEN | 10 | 25998886  | - | NM_172787    | L3mbt13       | - |
| 191 | Cdkn2a <sup>-/-</sup> _HSPCs | LV.SF.LTR | SPLEEN | 10 | 30259454  | + | NM_028604    | Trmt11        | - |
| 230 | Cdkn2a <sup>-/-</sup> _HSPCs | LV.SF.LTR | SPLEEN | 10 | 30529979  | + | NM_172495    | Ncoa7         | - |
| 182 | Cdkn2a <sup>-/-</sup> _HSPCs | LV.SF.LTR | SPLEEN | 10 | 37667715  | + | NM_008538    | Marcks        | - |
| 182 | Cdkn2a <sup>-/-</sup> _HSPCs | LV.SF.LTR | BM     | 10 | 40106083  | + | NM_198164    | Cdc216        | + |
| 184 | Cdkn2a <sup>-/-</sup> _HSPCs | LV.SF.LTR | BM     | 10 | 40106086  | + | NM_198164    | Cdc216        | + |
| 184 | Cdkn2a <sup>-/-</sup> _HSPCs | LV.SF.LTR | SPLEEN | 10 | 40136476  | + | NM_198164    | Cdc216        | - |
| 184 | Cdkn2a <sup>-/-</sup> _HSPCs | LV.SF.LTR | SPLEEN | 10 | 40136609  | - | NM_198164    | Cdc216        | - |
| 275 | Cdkn2a <sup>-/-</sup> _HSPCs | LV.SF.LTR | BM     | 10 | 45150008  | - | NM_001031772 | Lin28b        | - |
| 184 | Cdkn2a <sup>-/-</sup> _HSPCs | LV.SF.LTR | SPLEEN | 10 | 48840735  | + | NM_001111268 | Grik2         | - |
| 224 | Cdkn2a <sup>-/-</sup> _HSPCs | LV.SF.LTR | SPLEEN | 10 | 50482116  | - | NM_001146089 | Ascc3         | + |
| 230 | Cdkn2a <sup>-/-</sup> _HSPCs | LV.SF.LTR | SPLEEN | 10 | 50992540  | + | NM_008147    | Gp49a         | + |
| 226 | Cdkn2a <sup>-/-</sup> _HSPCs | LV.SF.LTR | SPLEEN | 10 | 55871155  | + | NM_001033385 | D630037F22Rik | - |
| 226 | Cdkn2a <sup>-/-</sup> _HSPCs | LV.SF.LTR | SPLEEN | 10 | 56627502  | - | NM_010288    | Gja1          | + |
| 173 | Cdkn2a <sup>-/-</sup> _HSPCs | LV.SF.LTR | SPLEEN | 10 | 62633556  | - | NM_182992    | Mypn          | - |
| 296 | Cdkn2a <sup>-/-</sup> _HSPCs | LV.SF.LTR | BM     | 10 | 66559773  | - | XM_975833.1  | Jmjd1c        | + |
| 177 | Cdkn2a <sup>-/-</sup> _HSPCs | LV.SF.LTR | SPLEEN | 10 | 66718148  | + | NM_207221    | Jmjd1c        | + |
| 177 | Cdkn2a <sup>-/-</sup> _HSPCs | LV.SF.LTR | SPLEEN | 10 | 66718345  | - | NM_207221    | Jmjd1c        | + |
| 191 | Cdkn2a <sup>-/-</sup> _HSPCs | LV.SF.LTR | SPLEEN | 10 | 67065193  | - | NM_001005419 | Ado           | - |



|      |                              |           |        |    |           |   |              |               |   |
|------|------------------------------|-----------|--------|----|-----------|---|--------------|---------------|---|
| 230  | Cdkn2a <sup>-/-</sup> _HSPCs | LV.SF.LTR | SPLEEN | 10 | 70736522  | - | NM_145420    | Ube2d1        | - |
| BULK | Cdkn2a <sup>-/-</sup> _HSPCs | LV.SF.LTR | BULK   | 10 | 74081756  | + | NM_023115    | Pcdh15        | + |
| BULK | Cdkn2a <sup>-/-</sup> _HSPCs | LV.SF.LTR | BULK   | 10 | 74492812  | - | NM_029781    | Rab36         | + |
| BULK | Cdkn2a <sup>-/-</sup> _HSPCs | LV.SF.LTR | BULK   | 10 | 80267748  | + | NM_175195    | 3110056O03Rik | + |
| 180  | Cdkn2a <sup>-/-</sup> _HSPCs | LV.SF.LTR | SPLEEN | 10 | 89268657  | + | NM_029166    | Uhrf1bp11     | + |
| BULK | Cdkn2a <sup>-/-</sup> _HSPCs | LV.SF.LTR | BULK   | 10 | 98380104  | + | NM_026482    | Atp2b1        | + |
| 226  | Cdkn2a <sup>-/-</sup> _HSPCs | LV.SF.LTR | SPLEEN | 10 | 101949654 | + | NM_024435    | Nts           | - |
| 226  | Cdkn2a <sup>-/-</sup> _HSPCs | LV.SF.LTR | SPLEEN | 10 | 103579765 | + | NM_175328    | Slc6a15       | + |
| 184  | Cdkn2a <sup>-/-</sup> _HSPCs | LV.SF.LTR | SPLEEN | 10 | 104892921 | + | NM_177368    | Tmtc2         | - |
| 173  | Cdkn2a <sup>-/-</sup> _HSPCs | LV.SF.LTR | SPLEEN | 10 | 108394622 | - | NM_009306    | Syt1          | - |
| 212  | Cdkn2a <sup>-/-</sup> _HSPCs | LV.SF.LTR | SPLEEN | 10 | 110217020 | + | NM_178609    | E2f7          | + |
| 177  | Cdkn2a <sup>-/-</sup> _HSPCs | LV.SF.LTR | SPLEEN | 10 | 115998020 | - | NM_001037846 | Cnot2         | - |
| 270  | Cdkn2a <sup>-/-</sup> _HSPCs | LV.SF.LTR | THYMUS | 10 | 117465466 | + | NM_148922    | Mdm1          | + |
| 180  | Cdkn2a <sup>-/-</sup> _HSPCs | LV.SF.LTR | SPLEEN | 10 | 121644781 | + | NR_027637    | Gm4489        | + |
| 177  | Cdkn2a <sup>-/-</sup> _HSPCs | LV.SF.LTR | SPLEEN | 10 | 126765788 | - | NM_146011    | Arhgap9       | + |
| 180  | Cdkn2a <sup>-/-</sup> _HSPCs | LV.SF.LTR | SPLEEN | 11 | 3030369   | + | NR_003518    | 4933439C20Rik | - |
| 191  | Cdkn2a <sup>-/-</sup> _HSPCs | LV.SF.LTR | SPLEEN | 11 | 3031551   | - | NR_003518    | 4933439C20Rik | - |
| 224  | Cdkn2a <sup>-/-</sup> _HSPCs | LV.SF.LTR | SPLEEN | 11 | 3105258   | - | NM_023743    | Eif4enif1     | + |
| 173  | Cdkn2a <sup>-/-</sup> _HSPCs | LV.SF.LTR | SPLEEN | 11 | 5212576   | - | NM_001080924 | Znrf3         | - |
| 226  | Cdkn2a <sup>-/-</sup> _HSPCs | LV.SF.LTR | SPLEEN | 11 | 6331838   | - | NM_008907    | Ppia          | + |
| 224  | Cdkn2a <sup>-/-</sup> _HSPCs | LV.SF.LTR | SPLEEN | 11 | 6342068   | + | NM_008907    | Ppia          | + |
| BULK | Cdkn2a <sup>-/-</sup> _HSPCs | LV.SF.LTR | BULK   | 11 | 8552613   | + | NM_001083587 | Tns3          | - |
| 261  | Cdkn2a <sup>-/-</sup> _HSPCs | LV.SF.LTR | BM     | 11 | 9798936   | - | NM_178259    | Abca13        | + |
| 275  | Cdkn2a <sup>-/-</sup> _HSPCs | LV.SF.LTR | BM     | 11 | 11077025  | + | NM_177033    | Vwc2          | + |
| 173  | Cdkn2a <sup>-/-</sup> _HSPCs | LV.SF.LTR | SPLEEN | 11 | 16888383  | + | NM_019549    | Plek          | - |
| 229  | Cdkn2a <sup>-/-</sup> _HSPCs | LV.SF.LTR | BM     | 11 | 18422438  | - | NM_010789    | Meis1         | - |
| 224  | Cdkn2a <sup>-/-</sup> _HSPCs | LV.SF.LTR | SPLEEN | 11 | 19999539  | - | NM_146243    | Actr2         | - |
| 173  | Cdkn2a <sup>-/-</sup> _HSPCs | LV.SF.LTR | SPLEEN | 11 | 20004457  | - | NM_146243    | Actr2         | - |
| 184  | Cdkn2a <sup>-/-</sup> _HSPCs | LV.SF.LTR | SPLEEN | 11 | 20115256  | + | NM_008996    | Rab1          | + |
| 180  | Cdkn2a <sup>-/-</sup> _HSPCs | LV.SF.LTR | SPLEEN | 11 | 26296462  | + | NM_025923    | Fanc1         | + |
| 180  | Cdkn2a <sup>-/-</sup> _HSPCs | LV.SF.LTR | SPLEEN | 11 | 28012987  | + | NM_181577    | Ccdc85a       | - |

|     |                              |           |        |    |           |   |              |               |   |
|-----|------------------------------|-----------|--------|----|-----------|---|--------------|---------------|---|
| 213 | Cdkn2a <sup>-/-</sup> _HSPCs | LV.SF.LTR | SPLEEN | 11 | 30710367  | - | NM_134013    | Psme4         | + |
| 191 | Cdkn2a <sup>-/-</sup> _HSPCs | LV.SF.LTR | SPLEEN | 11 | 30718280  | - | NM_134013    | Psme4         | + |
| 226 | Cdkn2a <sup>-/-</sup> _HSPCs | LV.SF.LTR | SPLEEN | 11 | 31005348  | - | NM_023906    | Asb3          | + |
| 184 | Cdkn2a <sup>-/-</sup> _HSPCs | LV.SF.LTR | SPLEEN | 11 | 31796074  | - | NM_026252    | Cpeb4         | + |
| 180 | Cdkn2a <sup>-/-</sup> _HSPCs | LV.SF.LTR | SPLEEN | 11 | 32635455  | + | NM_134015    | Fbxw11        | + |
| 180 | Cdkn2a <sup>-/-</sup> _HSPCs | LV.SF.LTR | SPLEEN | 11 | 35599134  | - | NM_145962    | Pank3         | + |
| 226 | Cdkn2a <sup>-/-</sup> _HSPCs | LV.SF.LTR | SPLEEN | 11 | 40495234  | + | NM_134017    | Mat2b         | - |
| 191 | Cdkn2a <sup>-/-</sup> _HSPCs | LV.SF.LTR | SPLEEN | 11 | 40501555  | + | NM_134017    | Mat2b         | - |
| 226 | Cdkn2a <sup>-/-</sup> _HSPCs | LV.SF.LTR | SPLEEN | 11 | 48893232  | - | NM_010999    | Olfir56       | + |
| 182 | Cdkn2a <sup>-/-</sup> _HSPCs | LV.SF.LTR | BM     | 11 | 48908149  | + | NM_010999    | Olfir56       | + |
| 184 | Cdkn2a <sup>-/-</sup> _HSPCs | LV.SF.LTR | BM     | 11 | 48908149  | + | NM_010999    | Olfir56       | + |
| 173 | Cdkn2a <sup>-/-</sup> _HSPCs | LV.SF.LTR | SPLEEN | 11 | 50069822  | + | NM_175334    | Maml1         | - |
| 184 | Cdkn2a <sup>-/-</sup> _HSPCs | LV.SF.LTR | SPLEEN | 11 | 51805503  | + | NM_009458    | Ube2b         | - |
| 189 | Cdkn2a <sup>-/-</sup> _HSPCs | LV.SF.LTR | SPLEEN | 11 | 57342919  | + | NM_145426    | Mfap3         | + |
| 212 | Cdkn2a <sup>-/-</sup> _HSPCs | LV.SF.LTR | SPLEEN | 11 | 63809611  | + | NM_178379    | Cox10         | - |
| 180 | Cdkn2a <sup>-/-</sup> _HSPCs | LV.SF.LTR | SPLEEN | 11 | 70392432  | - | NM_001045959 | Mink1         | + |
| 255 | Cdkn2a <sup>-/-</sup> _HSPCs | LV.SF.LTR | BM     | 11 | 74773202  | + | NM_001002764 | Smg6          | + |
| 254 | Cdkn2a <sup>-/-</sup> _HSPCs | LV.SF.LTR | BM     | 11 | 77242436  | + | NM_177710    | Ssh2          | + |
| 180 | Cdkn2a <sup>-/-</sup> _HSPCs | LV.SF.LTR | SPLEEN | 11 | 78943328  | + | NM_013571    | Ksr1          | - |
| 173 | Cdkn2a <sup>-/-</sup> _HSPCs | LV.SF.LTR | SPLEEN | 11 | 83193129  | - | NM_001035854 | Ap2b1         | + |
| 173 | Cdkn2a <sup>-/-</sup> _HSPCs | LV.SF.LTR | SPLEEN | 11 | 86487781  | - | NM_029478    | Tmem49        | + |
| 173 | Cdkn2a <sup>-/-</sup> _HSPCs | LV.SF.LTR | SPLEEN | 11 | 91508251  | - | NM_028547    | Kif2b         | - |
| 229 | Cdkn2a <sup>-/-</sup> _HSPCs | LV.SF.LTR | SPLEEN | 11 | 101297165 | - | NM_172566    | Rundc1        | + |
| 226 | Cdkn2a <sup>-/-</sup> _HSPCs | LV.SF.LTR | SPLEEN | 11 | 103100135 | - | NM_016896    | Map3k14       | - |
| 226 | Cdkn2a <sup>-/-</sup> _HSPCs | LV.SF.LTR | SPLEEN | 11 | 104241815 | - | NM_001081045 | 1700081L11Rik | + |
| 230 | Cdkn2a <sup>-/-</sup> _HSPCs | LV.SF.LTR | SPLEEN | 11 | 104259469 | - | NM_001081045 | 1700081L11Rik | + |
| 191 | Cdkn2a <sup>-/-</sup> _HSPCs | LV.SF.LTR | SPLEEN | 11 | 106738622 | + | NM_025481    | Smurf2        | - |
| 180 | Cdkn2a <sup>-/-</sup> _HSPCs | LV.SF.LTR | SPLEEN | 11 | 116246652 | - | NM_176902    | Fam100b       | + |
| 173 | Cdkn2a <sup>-/-</sup> _HSPCs | LV.SF.LTR | SPLEEN | 12 | 4954826   | - | NM_001099628 | Atad2b        | + |
| 257 | Cdkn2a <sup>-/-</sup> _HSPCs | LV.SF.LTR | BM     | 12 | 5018756   | + | NM_001099628 | Atad2b        | + |
| 173 | Cdkn2a <sup>-/-</sup> _HSPCs | LV.SF.LTR | SPLEEN | 12 | 29459893  | + | NM_201357    | Tssc1         | + |

|      |                              |           |        |    |           |   |              |               |   |
|------|------------------------------|-----------|--------|----|-----------|---|--------------|---------------|---|
| 173  | Cdkn2a <sup>-/-</sup> _HSPCs | LV.SF.LTR | SPLEEN | 12 | 36893457  | - | NM_146033    | Ankmy2        | + |
| 224  | Cdkn2a <sup>-/-</sup> _HSPCs | LV.SF.LTR | BM     | 12 | 40545660  | + | NM_007487    | Arl4a         | - |
| 226  | Cdkn2a <sup>-/-</sup> _HSPCs | LV.SF.LTR | SPLEEN | 12 | 40709425  | - | NM_001039515 | Arl4a         | - |
| 224  | Cdkn2a <sup>-/-</sup> _HSPCs | LV.SF.LTR | SPLEEN | 12 | 40761823  | + | NM_001039515 | Arl4a         | - |
| 226  | Cdkn2a <sup>-/-</sup> _HSPCs | LV.SF.LTR | SPLEEN | 12 | 46097349  | + | NM_144552    | Stxbp6        | - |
| 226  | Cdkn2a <sup>-/-</sup> _HSPCs | LV.SF.LTR | SPLEEN | 12 | 47847833  | - | NM_144552    | Stxbp6        | - |
| BULK | Cdkn2a <sup>-/-</sup> _HSPCs | LV.SF.LTR | BULK   | 12 | 49170323  | + | NM_008241    | Foxg1         | + |
| 173  | Cdkn2a <sup>-/-</sup> _HSPCs | LV.SF.LTR | SPLEEN | 12 | 52761025  | - | NM_052973    | Strn3         | - |
| 226  | Cdkn2a <sup>-/-</sup> _HSPCs | LV.SF.LTR | SPLEEN | 12 | 56804011  | - | NM_001003719 | Garn11        | - |
| 224  | Cdkn2a <sup>-/-</sup> _HSPCs | LV.SF.LTR | SPLEEN | 12 | 58346136  | + | NM_001037746 | AU021838      | - |
| 191  | Cdkn2a <sup>-/-</sup> _HSPCs | LV.SF.LTR | SPLEEN | 12 | 59363331  | + | NM_025809    | Clec14a       | - |
| 184  | Cdkn2a <sup>-/-</sup> _HSPCs | LV.SF.LTR | SPLEEN | 12 | 61398060  | + | NM_001033156 | Fbxo33        | - |
| 224  | Cdkn2a <sup>-/-</sup> _HSPCs | LV.SF.LTR | SPLEEN | 12 | 66120626  | + | NM_177806    | Prpf39        | + |
| 226  | Cdkn2a <sup>-/-</sup> _HSPCs | LV.SF.LTR | SPLEEN | 12 | 66247135  | - | NM_172578    | C79407        | + |
| 173  | Cdkn2a <sup>-/-</sup> _HSPCs | LV.SF.LTR | SPLEEN | 12 | 67613879  | + | NM_207010    | Mdga2         | - |
| 224  | Cdkn2a <sup>-/-</sup> _HSPCs | LV.SF.LTR | SPLEEN | 12 | 69357332  | + | NM_009093    | Rps29         | - |
| 213  | Cdkn2a <sup>-/-</sup> _HSPCs | LV.SF.LTR | SPLEEN | 12 | 71306765  | - | NM_133198    | Pygl          | - |
| 173  | Cdkn2a <sup>-/-</sup> _HSPCs | LV.SF.LTR | SPLEEN | 12 | 74441482  | - | NM_029580    | Trmt5         | - |
| 191  | Cdkn2a <sup>-/-</sup> _HSPCs | LV.SF.LTR | SPLEEN | 12 | 75035921  | + | NM_010431    | Hif1a         | + |
| 191  | Cdkn2a <sup>-/-</sup> _HSPCs | LV.SF.LTR | SPLEEN | 12 | 78427346  | + | NM_016893    | Fut8          | + |
| 214  | Cdkn2a <sup>-/-</sup> _HSPCs | LV.SF.LTR | SPLEEN | 12 | 81493176  | - | NM_177267    | Wdr22         | - |
| BULK | Cdkn2a <sup>-/-</sup> _HSPCs | LV.SF.LTR | BULK   | 12 | 90203953  | - | NM_172544    | Nrxn3         | + |
| 191  | Cdkn2a <sup>-/-</sup> _HSPCs | LV.SF.LTR | SPLEEN | 12 | 91356629  | + | NM_172544    | Nrxn3         | + |
| 180  | Cdkn2a <sup>-/-</sup> _HSPCs | LV.SF.LTR | SPLEEN | 12 | 92915292  | - | NM_175367    | Ston2         | - |
| 272  | Cdkn2a <sup>-/-</sup> _HSPCs | LV.SF.LTR | BM     | 12 | 94568209  | + | NM_201518    | Flrt2         | + |
| 312  | Cdkn2a <sup>-/-</sup> _HSPCs | LV.SF.LTR | BM     | 12 | 96145621  | + | NM_201518    | Flrt2         | + |
| 180  | Cdkn2a <sup>-/-</sup> _HSPCs | LV.SF.LTR | SPLEEN | 12 | 97446544  | + | NM_027076    | 1700019M22Rik | - |
| 173  | Cdkn2a <sup>-/-</sup> _HSPCs | LV.SF.LTR | SPLEEN | 12 | 107072631 | + | NM_011112    | Papola        | + |
| BULK | Cdkn2a <sup>-/-</sup> _HSPCs | LV.SF.LTR | BULK   | 12 | 111990743 | + | NM_178041    | Eif5          | + |
| 230  | Cdkn2a <sup>-/-</sup> _HSPCs | LV.SF.LTR | SPLEEN | 12 | 116602608 | + | NM_001004066 | Zfp386        | + |
| 230  | Cdkn2a <sup>-/-</sup> _HSPCs | LV.SF.LTR | SPLEEN | 13 | 5427461   | - | NM_011803    | Klf6          | + |

|      |                              |           |        |    |          |   |              |               |   |
|------|------------------------------|-----------|--------|----|----------|---|--------------|---------------|---|
| 173  | Cdkn2a <sup>-/-</sup> _HSPCs | LV.SF.LTR | SPLEEN | 13 | 6587540  | + | NM_019703    | Pfcp          | - |
| 212  | Cdkn2a <sup>-/-</sup> _HSPCs | LV.SF.LTR | SPLEEN | 13 | 8830793  | + | NM_001039388 | Wdr37         | - |
| BULK | Cdkn2a <sup>-/-</sup> _HSPCs | LV.SF.LTR | BULK   | 13 | 12463569 | + | NM_144835    | Hear1         | + |
| 257  | Cdkn2a <sup>-/-</sup> _HSPCs | LV.SF.LTR | BM     | 13 | 16993480 | + | NM_138654    | 5033411D12Rik | - |
| 173  | Cdkn2a <sup>-/-</sup> _HSPCs | LV.SF.LTR | SPLEEN | 13 | 17808289 | + | NM_001081058 | Cdc215        | - |
| 173  | Cdkn2a <sup>-/-</sup> _HSPCs | LV.SF.LTR | SPLEEN | 13 | 17842423 | + | NM_001081058 | Cdc215        | - |
| 173  | Cdkn2a <sup>-/-</sup> _HSPCs | LV.SF.LTR | SPLEEN | 13 | 18811101 | + | NM_172120    | Vps41         | + |
| 184  | Cdkn2a <sup>-/-</sup> _HSPCs | LV.SF.LTR | SPLEEN | 13 | 28597771 | + | NM_023746    | Prl5a1        | + |
| 191  | Cdkn2a <sup>-/-</sup> _HSPCs | LV.SF.LTR | SPLEEN | 13 | 29560146 | + | NM_144536    | Cdkal1        | - |
| 191  | Cdkn2a <sup>-/-</sup> _HSPCs | LV.SF.LTR | SPLEEN | 13 | 29753202 | - | NM_144536    | Cdkal1        | - |
| 180  | Cdkn2a <sup>-/-</sup> _HSPCs | LV.SF.LTR | SPLEEN | 13 | 31018217 | - | NM_025588    | Exoc2         | - |
| 191  | Cdkn2a <sup>-/-</sup> _HSPCs | LV.SF.LTR | SPLEEN | 13 | 33136307 | - | NM_011452    | Serpinb9b     | + |
| 212  | Cdkn2a <sup>-/-</sup> _HSPCs | LV.SF.LTR | SPLEEN | 13 | 34018818 | + | NM_009254    | Serpinb6a     | - |
| 191  | Cdkn2a <sup>-/-</sup> _HSPCs | LV.SF.LTR | SPLEEN | 13 | 36384372 | - | NM_001039189 | Fars2         | + |
| 184  | Cdkn2a <sup>-/-</sup> _HSPCs | LV.SF.LTR | SPLEEN | 13 | 44902862 | + | NM_021878    | Jarid2        | + |
| BULK | Cdkn2a <sup>-/-</sup> _HSPCs | LV.SF.LTR | BULK   | 13 | 46833269 | + | NM_010617    | Kif13a        | - |
| 180  | Cdkn2a <sup>-/-</sup> _HSPCs | LV.SF.LTR | SPLEEN | 13 | 55153519 | + | NM_011307    | Uimc1         | - |
| 214  | Cdkn2a <sup>-/-</sup> _HSPCs | LV.SF.LTR | BM     | 13 | 55268300 | - | NM_008739    | Nsd1          | + |
| 261  | Cdkn2a <sup>-/-</sup> _HSPCs | LV.SF.LTR | THYMUS | 13 | 55270673 | + | NM_008739    | Nsd1          | + |
| 271  | Cdkn2a <sup>-/-</sup> _HSPCs | LV.SF.LTR | BM     | 13 | 55270674 | + | NM_008739    | Nsd1          | + |
| 214  | Cdkn2a <sup>-/-</sup> _HSPCs | LV.SF.LTR | SPLEEN | 13 | 55360039 | - | NM_008739    | Nsd1          | + |
| 192  | Cdkn2a <sup>-/-</sup> _HSPCs | LV.SF.LTR | SPLEEN | 13 | 55362412 | + | NM_008739    | Nsd1          | + |
| 189  | Cdkn2a <sup>-/-</sup> _HSPCs | LV.SF.LTR | SPLEEN | 13 | 56644333 | - | NM_010702    | Lect2         | - |
| 180  | Cdkn2a <sup>-/-</sup> _HSPCs | LV.SF.LTR | SPLEEN | 13 | 58161802 | - | NM_029872    | Hnrnpa0       | - |
| 212  | Cdkn2a <sup>-/-</sup> _HSPCs | LV.SF.LTR | SPLEEN | 13 | 63191874 | - | NM_028079    | 2010111I01Rik | + |
| 226  | Cdkn2a <sup>-/-</sup> _HSPCs | LV.SF.LTR | SPLEEN | 13 | 63950409 | + | NM_023507    | 0610007P08Rik | + |
| 180  | Cdkn2a <sup>-/-</sup> _HSPCs | LV.SF.LTR | SPLEEN | 13 | 65175656 | + | NM_001083901 | Hiatl1        | - |
| 180  | Cdkn2a <sup>-/-</sup> _HSPCs | LV.SF.LTR | SPLEEN | 13 | 69053930 | - | NM_153534    | Adcy2         | - |
| 173  | Cdkn2a <sup>-/-</sup> _HSPCs | LV.SF.LTR | SPLEEN | 13 | 74489213 | - | NM_024201    | Ccdc127       | + |
| 266  | Cdkn2a <sup>-/-</sup> _HSPCs | LV.SF.LTR | BM     | 13 | 76572945 | + | NM_001081352 | AK129128      | + |
| 224  | Cdkn2a <sup>-/-</sup> _HSPCs | LV.SF.LTR | SPLEEN | 13 | 76599941 | + | NM_030174    | Mctp1         | + |

|     |                              |           |        |    |           |   |              |               |   |
|-----|------------------------------|-----------|--------|----|-----------|---|--------------|---------------|---|
| 173 | Cdkn2a <sup>-/-</sup> _HSPCs | LV.SF.LTR | SPLEEN | 13 | 77189410  | + | NM_134071    | Ankrd32       | - |
| 226 | Cdkn2a <sup>-/-</sup> _HSPCs | LV.SF.LTR | SPLEEN | 13 | 77540470  | + | NM_001145676 | 2210408I21Rik | + |
| 224 | Cdkn2a <sup>-/-</sup> _HSPCs | LV.SF.LTR | SPLEEN | 13 | 78723154  | - | NM_010151    | Nr2f1         | - |
| 226 | Cdkn2a <sup>-/-</sup> _HSPCs | LV.SF.LTR | SPLEEN | 13 | 83026415  | - | NM_025282    | Mef2c         | + |
| 226 | Cdkn2a <sup>-/-</sup> _HSPCs | LV.SF.LTR | SPLEEN | 13 | 83261453  | - | NM_025282    | Mef2c         | + |
| 226 | Cdkn2a <sup>-/-</sup> _HSPCs | LV.SF.LTR | SPLEEN | 13 | 83261685  | - | NM_025282    | Mef2c         | + |
| 189 | Cdkn2a <sup>-/-</sup> _HSPCs | LV.SF.LTR | SPLEEN | 13 | 83721026  | + | NM_025282    | Mef2c         | + |
| 224 | Cdkn2a <sup>-/-</sup> _HSPCs | LV.SF.LTR | SPLEEN | 13 | 85407546  | - | NM_145452    | Rasa1         | - |
| 173 | Cdkn2a <sup>-/-</sup> _HSPCs | LV.SF.LTR | SPLEEN | 13 | 90038292  | - | NM_028012    | Xrcc4         | - |
| 229 | Cdkn2a <sup>-/-</sup> _HSPCs | LV.SF.LTR | SPLEEN | 13 | 90155205  | + | NM_028012    | Xrcc4         | - |
| 189 | Cdkn2a <sup>-/-</sup> _HSPCs | LV.SF.LTR | SPLEEN | 13 | 90213895  | + | NM_028012    | Xrcc4         | - |
| 212 | Cdkn2a <sup>-/-</sup> _HSPCs | LV.SF.LTR | SPLEEN | 13 | 101975500 | - | NM_022885    | Slc30a5       | - |
| 180 | Cdkn2a <sup>-/-</sup> _HSPCs | LV.SF.LTR | SPLEEN | 13 | 109560699 | - | NM_011056    | Pde4d         | + |
| 230 | Cdkn2a <sup>-/-</sup> _HSPCs | LV.SF.LTR | SPLEEN | 13 | 109792589 | - | NM_011056    | Pde4d         | + |
| 230 | Cdkn2a <sup>-/-</sup> _HSPCs | LV.SF.LTR | BM     | 13 | 110123259 | - | NM_011056    | Pde4d         | + |
| 262 | Cdkn2a <sup>-/-</sup> _HSPCs | LV.SF.LTR | BM     | 13 | 115954105 | + | NM_008396    | Itga2         | - |
| 177 | Cdkn2a <sup>-/-</sup> _HSPCs | LV.SF.LTR | SPLEEN | 14 | 9778914   | - | NM_028934    | 4930452B06Rik | - |
| 184 | Cdkn2a <sup>-/-</sup> _HSPCs | LV.SF.LTR | SPLEEN | 14 | 13592214  | - | NM_001042617 | Cadps         | - |
| 180 | Cdkn2a <sup>-/-</sup> _HSPCs | LV.SF.LTR | SPLEEN | 14 | 14942425  | - | NM_025550    | Psm6          | - |
| 226 | Cdkn2a <sup>-/-</sup> _HSPCs | LV.SF.LTR | SPLEEN | 14 | 17152281  | + | NM_021504    | Ngly1         | + |
| 212 | Cdkn2a <sup>-/-</sup> _HSPCs | LV.SF.LTR | SPLEEN | 14 | 18782896  | - | NM_001113417 | Thrb          | + |
| 226 | Cdkn2a <sup>-/-</sup> _HSPCs | LV.SF.LTR | SPLEEN | 14 | 18786668  | + | NM_001113417 | Thrb          | + |
| 180 | Cdkn2a <sup>-/-</sup> _HSPCs | LV.SF.LTR | SPLEEN | 14 | 18837669  | - | NM_009380    | Thrb          | + |
| 180 | Cdkn2a <sup>-/-</sup> _HSPCs | LV.SF.LTR | SPLEEN | 14 | 18837987  | - | NM_009380    | Thrb          | + |
| 226 | Cdkn2a <sup>-/-</sup> _HSPCs | LV.SF.LTR | SPLEEN | 14 | 25296752  | + | NM_001081247 | Polr3a        | - |
| 230 | Cdkn2a <sup>-/-</sup> _HSPCs | LV.SF.LTR | SPLEEN | 14 | 26195180  | + | NM_183208    | Zmiz1         | + |
| 191 | Cdkn2a <sup>-/-</sup> _HSPCs | LV.SF.LTR | SPLEEN | 14 | 26371205  | - | NM_183208    | Zmiz1         | + |
| 226 | Cdkn2a <sup>-/-</sup> _HSPCs | LV.SF.LTR | SPLEEN | 14 | 28181528  | + | NM_027871    | Arhgef3       | + |
| 230 | Cdkn2a <sup>-/-</sup> _HSPCs | LV.SF.LTR | SPLEEN | 14 | 28301175  | - | NM_177111    | Ccdc66        | - |
| 271 | Cdkn2a <sup>-/-</sup> _HSPCs | LV.SF.LTR | BM     | 14 | 30877014  | + | NM_030166    | Galnt12       | + |
| 226 | Cdkn2a <sup>-/-</sup> _HSPCs | LV.SF.LTR | SPLEEN | 14 | 32624863  | - | NM_001024604 | Ankrd28       | - |

|      |                              |           |        |    |           |   |              |               |   |
|------|------------------------------|-----------|--------|----|-----------|---|--------------|---------------|---|
| 189  | Cdkn2a <sup>-/-</sup> _HSPCs | LV.SF.LTR | SPLEEN | 14 | 37417638  | - | NM_027045    | Gcap14        | - |
| 224  | Cdkn2a <sup>-/-</sup> _HSPCs | LV.SF.LTR | SPLEEN | 14 | 37736898  | + | NM_028407    | Gcap14        | - |
| 182  | Cdkn2a <sup>-/-</sup> _HSPCs | LV.SF.LTR | SPLEEN | 14 | 37738949  | - | NM_028407    | Gcap14        | - |
| BULK | Cdkn2a <sup>-/-</sup> _HSPCs | LV.SF.LTR | BULK   | 14 | 38549169  | + | NM_008734    | Nrg3          | - |
| 226  | Cdkn2a <sup>-/-</sup> _HSPCs | LV.SF.LTR | SPLEEN | 14 | 45791395  | - | NM_172597    | Txndc16       | - |
| 173  | Cdkn2a <sup>-/-</sup> _HSPCs | LV.SF.LTR | SPLEEN | 14 | 46003368  | - | NM_019425    | Gnpnat1       | - |
| 173  | Cdkn2a <sup>-/-</sup> _HSPCs | LV.SF.LTR | SPLEEN | 14 | 48755057  | + | NM_033602    | Peli2         | + |
| 213  | Cdkn2a <sup>-/-</sup> _HSPCs | LV.SF.LTR | SPLEEN | 14 | 49657245  | + | NM_207214    | Exoc5         | - |
| 212  | Cdkn2a <sup>-/-</sup> _HSPCs | LV.SF.LTR | SPLEEN | 14 | 56434728  | + | NM_023699    | Nfatc4        | + |
| 226  | Cdkn2a <sup>-/-</sup> _HSPCs | LV.SF.LTR | SPLEEN | 14 | 59527708  | + | NM_001004158 | Gm5142        | - |
| 173  | Cdkn2a <sup>-/-</sup> _HSPCs | LV.SF.LTR | SPLEEN | 14 | 62153247  | - | NM_025697    | 6330409N04Rik | - |
| 173  | Cdkn2a <sup>-/-</sup> _HSPCs | LV.SF.LTR | SPLEEN | 14 | 62992139  | - | NM_026001    | Rnaseh2b      | + |
| 180  | Cdkn2a <sup>-/-</sup> _HSPCs | LV.SF.LTR | SPLEEN | 14 | 63316519  | - | NM_008715    | Ints6         | - |
| 189  | Cdkn2a <sup>-/-</sup> _HSPCs | LV.SF.LTR | SPLEEN | 14 | 73263696  | + | NM_207636    | Fndc3a        | - |
| 226  | Cdkn2a <sup>-/-</sup> _HSPCs | LV.SF.LTR | SPLEEN | 14 | 75068085  | + | NM_172812    | Htr2a         | + |
| 182  | Cdkn2a <sup>-/-</sup> _HSPCs | LV.SF.LTR | SPLEEN | 14 | 87255240  | - | NM_019670    | Diap3         | - |
| 191  | Cdkn2a <sup>-/-</sup> _HSPCs | LV.SF.LTR | SPLEEN | 14 | 87361360  | + | NM_019670    | Diap3         | - |
| 214  | Cdkn2a <sup>-/-</sup> _HSPCs | LV.SF.LTR | SPLEEN | 14 | 89792427  | + | NR_002862    | Gm5088        | + |
| 226  | Cdkn2a <sup>-/-</sup> _HSPCs | LV.SF.LTR | SPLEEN | 14 | 95898128  | + | NM_025733    | 4921530L21Rik | + |
| 212  | Cdkn2a <sup>-/-</sup> _HSPCs | LV.SF.LTR | SPLEEN | 14 | 95898615  | + | NM_025733    | 4921530L21Rik | + |
| 180  | Cdkn2a <sup>-/-</sup> _HSPCs | LV.SF.LTR | SPLEEN | 14 | 96313401  | + | NM_025733    | 4921530L21Rik | + |
| 226  | Cdkn2a <sup>-/-</sup> _HSPCs | LV.SF.LTR | SPLEEN | 14 | 98287698  | - | NM_001038610 | Dach1         | - |
| 182  | Cdkn2a <sup>-/-</sup> _HSPCs | LV.SF.LTR | SPLEEN | 14 | 100864457 | + | NM_010636    | Klf12         | - |
| 173  | Cdkn2a <sup>-/-</sup> _HSPCs | LV.SF.LTR | SPLEEN | 14 | 101268521 | - | NM_029680    | 1700110M21Rik | - |
| 173  | Cdkn2a <sup>-/-</sup> _HSPCs | LV.SF.LTR | SPLEEN | 14 | 103672214 | - | NM_207215    | Mycbp2        | - |
| 173  | Cdkn2a <sup>-/-</sup> _HSPCs | LV.SF.LTR | SPLEEN | 14 | 105508173 | + | NM_134077    | Rbm26         | - |
| 173  | Cdkn2a <sup>-/-</sup> _HSPCs | LV.SF.LTR | SPLEEN | 14 | 111562772 | + | NM_175499    | Slitrk6       | - |
| 173  | Cdkn2a <sup>-/-</sup> _HSPCs | LV.SF.LTR | SPLEEN | 14 | 115442631 | + | NM_175500    | Gpc5          | + |
| 213  | Cdkn2a <sup>-/-</sup> _HSPCs | LV.SF.LTR | SPLEEN | 14 | 121312601 | - | NM_023579    | Ipo5          | + |
| 173  | Cdkn2a <sup>-/-</sup> _HSPCs | LV.SF.LTR | SPLEEN | 15 | 3212950   | + | NM_001042613 | Sepp1         | + |
| 173  | Cdkn2a <sup>-/-</sup> _HSPCs | LV.SF.LTR | SPLEEN | 15 | 3225845   | - | NM_001042613 | Sepp1         | + |

|     |                              |           |        |    |          |   |              |          |   |
|-----|------------------------------|-----------|--------|----|----------|---|--------------|----------|---|
| 212 | Cdkn2a <sup>-/-</sup> _HSPCs | LV.SF.LTR | SPLEEN | 15 | 3980819  | + | NM_024188    | Oxct1    | + |
| 173 | Cdkn2a <sup>-/-</sup> _HSPCs | LV.SF.LTR | SPLEEN | 15 | 8255028  | + | NM_201232    | Nipbl    | - |
| 212 | Cdkn2a <sup>-/-</sup> _HSPCs | LV.SF.LTR | SPLEEN | 15 | 8432888  | - | NM_027707    | Nipbl    | - |
| 226 | Cdkn2a <sup>-/-</sup> _HSPCs | LV.SF.LTR | SPLEEN | 15 | 12785516 | - | NM_001130149 | Rnasen   | + |
| 184 | Cdkn2a <sup>-/-</sup> _HSPCs | LV.SF.LTR | SPLEEN | 15 | 15034011 | - | NM_009869    | Cdh9     | + |
| 212 | Cdkn2a <sup>-/-</sup> _HSPCs | LV.SF.LTR | SPLEEN | 15 | 19831061 | - | NM_022816    | Acot10   | - |
| 212 | Cdkn2a <sup>-/-</sup> _HSPCs | LV.SF.LTR | SPLEEN | 15 | 21037980 | - | NM_001008420 | Cdh12    | + |
| 214 | Cdkn2a <sup>-/-</sup> _HSPCs | LV.SF.LTR | SPLEEN | 15 | 21659087 | - | NM_001008420 | Cdh12    | + |
| 224 | Cdkn2a <sup>-/-</sup> _HSPCs | LV.SF.LTR | SPLEEN | 15 | 24295226 | + | NM_001081299 | Cdh18    | + |
| 180 | Cdkn2a <sup>-/-</sup> _HSPCs | LV.SF.LTR | SPLEEN | 15 | 25508258 | + | NM_019472    | Myo10    | + |
| 230 | Cdkn2a <sup>-/-</sup> _HSPCs | LV.SF.LTR | SPLEEN | 15 | 31263548 | + | NM_026153    | Ankrd33b | - |
| 230 | Cdkn2a <sup>-/-</sup> _HSPCs | LV.SF.LTR | SPLEEN | 15 | 31263679 | - | NM_026153    | Ankrd33b | - |
| 173 | Cdkn2a <sup>-/-</sup> _HSPCs | LV.SF.LTR | SPLEEN | 15 | 34016222 | - | NM_026002    | Mtdh     | + |
| 177 | Cdkn2a <sup>-/-</sup> _HSPCs | LV.SF.LTR | SPLEEN | 15 | 34422482 | - | NM_008287    | Hrsp12   | - |
| 180 | Cdkn2a <sup>-/-</sup> _HSPCs | LV.SF.LTR | SPLEEN | 15 | 34422486 | - | NM_008287    | Hrsp12   | - |
| 274 | Cdkn2a <sup>-/-</sup> _HSPCs | LV.SF.LTR | BM     | 15 | 34437320 | - | NM_008287    | Hrsp12   | - |
| 224 | Cdkn2a <sup>-/-</sup> _HSPCs | LV.SF.LTR | SPLEEN | 15 | 35400498 | + | NM_177151    | Vps13b   | + |
| 173 | Cdkn2a <sup>-/-</sup> _HSPCs | LV.SF.LTR | SPLEEN | 15 | 37983661 | + | NM_001081359 | Ubr5     | - |
| 173 | Cdkn2a <sup>-/-</sup> _HSPCs | LV.SF.LTR | SPLEEN | 15 | 41455106 | - | NM_001130166 | Oxr1     | + |
| 224 | Cdkn2a <sup>-/-</sup> _HSPCs | LV.SF.LTR | SPLEEN | 15 | 44265255 | + | NM_175009    | Eny2     | + |
| 224 | Cdkn2a <sup>-/-</sup> _HSPCs | LV.SF.LTR | SPLEEN | 15 | 44269006 | - | NM_175009    | Eny2     | + |
| 180 | Cdkn2a <sup>-/-</sup> _HSPCs | LV.SF.LTR | SPLEEN | 15 | 45942234 | - | NM_026200    | Kenv1    | - |
| 226 | Cdkn2a <sup>-/-</sup> _HSPCs | LV.SF.LTR | SPLEEN | 15 | 46096908 | - | NM_026200    | Kenv1    | - |
| 180 | Cdkn2a <sup>-/-</sup> _HSPCs | LV.SF.LTR | SPLEEN | 15 | 49093431 | - | NM_001081391 | Csmd3    | - |
| 230 | Cdkn2a <sup>-/-</sup> _HSPCs | LV.SF.LTR | BM     | 15 | 49365978 | - | NM_001081391 | Csmd3    | - |
| 230 | Cdkn2a <sup>-/-</sup> _HSPCs | LV.SF.LTR | SPLEEN | 15 | 49367447 | - | NM_001081391 | Csmd3    | - |
| 226 | Cdkn2a <sup>-/-</sup> _HSPCs | LV.SF.LTR | SPLEEN | 15 | 49689302 | + | NM_032000    | Trps1    | - |
| 180 | Cdkn2a <sup>-/-</sup> _HSPCs | LV.SF.LTR | SPLEEN | 15 | 50597551 | + | NM_032000    | Trps1    | - |
| 275 | Cdkn2a <sup>-/-</sup> _HSPCs | LV.SF.LTR | BM     | 15 | 51795991 | + | NM_009009    | Rad21    | - |
| 230 | Cdkn2a <sup>-/-</sup> _HSPCs | LV.SF.LTR | SPLEEN | 15 | 52551909 | + | NM_027212    | Med30    | + |
| 226 | Cdkn2a <sup>-/-</sup> _HSPCs | LV.SF.LTR | SPLEEN | 15 | 55434003 | - | NM_134092    | Mtbp     | + |

|      |                              |           |        |    |           |   |              |         |   |
|------|------------------------------|-----------|--------|----|-----------|---|--------------|---------|---|
| 229  | Cdkn2a <sup>-/-</sup> _HSPCs | LV.SF.LTR | SPLEEN | 15 | 56497219  | + | NM_008216    | Has2    | - |
| 182  | Cdkn2a <sup>-/-</sup> _HSPCs | LV.SF.LTR | SPLEEN | 15 | 57962148  | + | NM_027435    | Atad2   | - |
| 182  | Cdkn2a <sup>-/-</sup> _HSPCs | LV.SF.LTR | SPLEEN | 15 | 57962199  | - | NM_027435    | Atad2   | - |
| BULK | Cdkn2a <sup>-/-</sup> _HSPCs | LV.SF.LTR | BULK   | 15 | 59242959  | + | NM_026746    | Nsmce2  | + |
| 277  | Cdkn2a <sup>-/-</sup> _HSPCs | LV.SF.LTR | BM     | 15 | 76477239  | + | NM_019396    | Cyhr1   | - |
| 180  | Cdkn2a <sup>-/-</sup> _HSPCs | LV.SF.LTR | SPLEEN | 15 | 81418656  | - | NM_177821    | Ep300   | + |
| 191  | Cdkn2a <sup>-/-</sup> _HSPCs | LV.SF.LTR | SPLEEN | 15 | 84757338  | - | NM_016714    | Nup50   | + |
| 191  | Cdkn2a <sup>-/-</sup> _HSPCs | LV.SF.LTR | SPLEEN | 15 | 84759999  | - | NM_016714    | Nup50   | + |
| 180  | Cdkn2a <sup>-/-</sup> _HSPCs | LV.SF.LTR | SPLEEN | 15 | 89938875  | - | NM_001033441 | Alg10b  | + |
| 226  | Cdkn2a <sup>-/-</sup> _HSPCs | LV.SF.LTR | SPLEEN | 15 | 96166417  | + | NM_175251    | Arid2   | + |
| BULK | Cdkn2a <sup>-/-</sup> _HSPCs | LV.SF.LTR | BULK   | 15 | 98371824  | + | NM_009833    | Ccnt1   | - |
| 180  | Cdkn2a <sup>-/-</sup> _HSPCs | LV.SF.LTR | SPLEEN | 15 | 103055744 | - | NM_001076789 | Cbx5    | - |
| 184  | Cdkn2a <sup>-/-</sup> _HSPCs | LV.SF.LTR | SPLEEN | 15 | 103292057 | - | NM_153505    | Nckap11 | + |
| 192  | Cdkn2a <sup>-/-</sup> _HSPCs | LV.SF.LTR | SPLEEN | 16 | 5336766   | - | NM_027446    | Fam86   | - |
| 191  | Cdkn2a <sup>-/-</sup> _HSPCs | LV.SF.LTR | SPLEEN | 16 | 11514112  | + | NM_028964    | Snx29   | + |
| 184  | Cdkn2a <sup>-/-</sup> _HSPCs | LV.SF.LTR | SPLEEN | 16 | 15806876  | + | NM_011159    | Prkdc   | + |
| 213  | Cdkn2a <sup>-/-</sup> _HSPCs | LV.SF.LTR | SPLEEN | 16 | 17306865  | + | NM_001001983 | Pi4ka   | - |
| 226  | Cdkn2a <sup>-/-</sup> _HSPCs | LV.SF.LTR | SPLEEN | 16 | 17658775  | + | NM_001040683 | Med15   | - |
| 173  | Cdkn2a <sup>-/-</sup> _HSPCs | LV.SF.LTR | SPLEEN | 16 | 19727357  | - | NM_177356    | Lamp3   | - |
| 230  | Cdkn2a <sup>-/-</sup> _HSPCs | LV.SF.LTR | SPLEEN | 16 | 19730814  | - | NM_177356    | Lamp3   | - |
| 212  | Cdkn2a <sup>-/-</sup> _HSPCs | LV.SF.LTR | SPLEEN | 16 | 21630841  | - | NM_001081366 | Vps8    | + |
| 274  | Cdkn2a <sup>-/-</sup> _HSPCs | LV.SF.LTR | BM     | 16 | 23985541  | + | NM_009744    | bcl6    | - |
| 212  | Cdkn2a <sup>-/-</sup> _HSPCs | LV.SF.LTR | SPLEEN | 16 | 26039229  | + | NM_173379    | Leprel1 | - |
| 173  | Cdkn2a <sup>-/-</sup> _HSPCs | LV.SF.LTR | SPLEEN | 16 | 27406121  | + | NM_001025615 | Ccdc50  | + |
| 192  | Cdkn2a <sup>-/-</sup> _HSPCs | LV.SF.LTR | SPLEEN | 16 | 29608820  | - | NM_133752    | Opa1    | + |
| 224  | Cdkn2a <sup>-/-</sup> _HSPCs | LV.SF.LTR | SPLEEN | 16 | 36839035  | - | NM_177128    | Iqcb1   | + |
| 230  | Cdkn2a <sup>-/-</sup> _HSPCs | LV.SF.LTR | SPLEEN | 16 | 37571921  | - | NM_001042499 | Rabl3   | + |
| 180  | Cdkn2a <sup>-/-</sup> _HSPCs | LV.SF.LTR | SPLEEN | 16 | 38221890  | + | NM_019827    | Gsk3b   | + |
| 189  | Cdkn2a <sup>-/-</sup> _HSPCs | LV.SF.LTR | SPLEEN | 16 | 44018798  | + | NM_153528    | Gramd1c | - |
| 213  | Cdkn2a <sup>-/-</sup> _HSPCs | LV.SF.LTR | SPLEEN | 16 | 46461971  | + | NM_021495    | Pvrl3   | - |
| 212  | Cdkn2a <sup>-/-</sup> _HSPCs | LV.SF.LTR | SPLEEN | 16 | 48960954  | + | NM_001110017 | Dzip3   | - |



|      |                              |           |        |    |          |   |              |            |   |
|------|------------------------------|-----------|--------|----|----------|---|--------------|------------|---|
| BULK | Cdkn2a <sup>-/-</sup> _HSPCs | LV.SF.LTR | BULK   | 16 | 49494136 | - | NM_028680    | Ift57      | + |
| 173  | Cdkn2a <sup>-/-</sup> _HSPCs | LV.SF.LTR | SPLEEN | 16 | 49499917 | - | NM_028680    | Ift57      | + |
| 224  | Cdkn2a <sup>-/-</sup> _HSPCs | LV.SF.LTR | SPLEEN | 16 | 49867865 | + | NM_010581    | Cd47       | + |
| 173  | Cdkn2a <sup>-/-</sup> _HSPCs | LV.SF.LTR | SPLEEN | 16 | 50249822 | - | NM_027444    | Bbx        | - |
| 189  | Cdkn2a <sup>-/-</sup> _HSPCs | LV.SF.LTR | SPLEEN | 16 | 50635166 | - | NM_027046    | Ccde54     | - |
| 180  | Cdkn2a <sup>-/-</sup> _HSPCs | LV.SF.LTR | SPLEEN | 16 | 52396779 | + | NM_009655    | Alcam      | - |
| 177  | Cdkn2a <sup>-/-</sup> _HSPCs | LV.SF.LTR | SPLEEN | 16 | 52532271 | + | NM_009655    | Alcam      | - |
| 294  | Cdkn2a <sup>-/-</sup> _HSPCs | LV.SF.LTR | THYMUS | 16 | 56744537 | + | NM_019631    | Tmem45a    | - |
| 180  | Cdkn2a <sup>-/-</sup> _HSPCs | LV.SF.LTR | SPLEEN | 16 | 62822428 | + | NM_026588    | Stx19      | + |
| 266  | Cdkn2a <sup>-/-</sup> _HSPCs | LV.SF.LTR | BM     | 16 | 67301540 | - | NM_178721    | Cadm2      | - |
| 212  | Cdkn2a <sup>-/-</sup> _HSPCs | LV.SF.LTR | SPLEEN | 16 | 72504941 | - | NM_019413    | Robo1      | + |
| 173  | Cdkn2a <sup>-/-</sup> _HSPCs | LV.SF.LTR | SPLEEN | 16 | 75538821 | + | NM_177142    | Lipi       | - |
| 173  | Cdkn2a <sup>-/-</sup> _HSPCs | LV.SF.LTR | SPLEEN | 16 | 77340403 | - | NM_013918    | Usp25      | + |
| 224  | Cdkn2a <sup>-/-</sup> _HSPCs | LV.SF.LTR | SPLEEN | 16 | 77425297 | + | NM_013918    | Usp25      | + |
| BULK | Cdkn2a <sup>-/-</sup> _HSPCs | LV.SF.LTR | BULK   | 16 | 78364040 | + | NM_025967    | D16Ert472e | - |
| 179  | Cdkn2a <sup>-/-</sup> _HSPCs | LV.SF.LTR | SPLEEN | 16 | 78444089 | + | NM_025967    | D16Ert472e | - |
| 191  | Cdkn2a <sup>-/-</sup> _HSPCs | LV.SF.LTR | SPLEEN | 16 | 78545197 | - | NM_025967    | D16Ert472e | - |
| 177  | Cdkn2a <sup>-/-</sup> _HSPCs | LV.SF.LTR | SPLEEN | 16 | 81389395 | - | NM_001113208 | Ncam2      | + |
| 192  | Cdkn2a <sup>-/-</sup> _HSPCs | LV.SF.LTR | SPLEEN | 16 | 81503882 | - | NM_010954    | Ncam2      | + |
| 182  | Cdkn2a <sup>-/-</sup> _HSPCs | LV.SF.LTR | SPLEEN | 16 | 81870456 | + | NM_001113208 | Ncam2      | + |
| 180  | Cdkn2a <sup>-/-</sup> _HSPCs | LV.SF.LTR | SPLEEN | 16 | 84342319 | - | NM_017404    | Mrpl39     | - |
| 226  | Cdkn2a <sup>-/-</sup> _HSPCs | LV.SF.LTR | SPLEEN | 16 | 85075232 | + | NM_007471    | App        | - |
| 191  | Cdkn2a <sup>-/-</sup> _HSPCs | LV.SF.LTR | SPLEEN | 16 | 85555650 | - | NM_144853    | Cypr1      | - |
| 226  | Cdkn2a <sup>-/-</sup> _HSPCs | LV.SF.LTR | SPLEEN | 16 | 86239969 | - | NM_011782    | Adamts5    | - |
| 212  | Cdkn2a <sup>-/-</sup> _HSPCs | LV.SF.LTR | SPLEEN | 16 | 86490751 | - | NM_011782    | Adamts5    | - |
| 191  | Cdkn2a <sup>-/-</sup> _HSPCs | LV.SF.LTR | SPLEEN | 16 | 86686863 | + | NM_001159331 | N6amt1     | + |
| 180  | Cdkn2a <sup>-/-</sup> _HSPCs | LV.SF.LTR | SPLEEN | 16 | 87093048 | - | NM_001159331 | N6amt1     | + |
| 226  | Cdkn2a <sup>-/-</sup> _HSPCs | LV.SF.LTR | SPLEEN | 16 | 92076575 | - | NM_017391    | Slc5a3     | + |
| BULK | Cdkn2a <sup>-/-</sup> _HSPCs | LV.SF.LTR | BULK   | 16 | 94478301 | + | NM_019543    | Pigp       | - |
| 180  | Cdkn2a <sup>-/-</sup> _HSPCs | LV.SF.LTR | SPLEEN | 16 | 94646977 | + | NM_009441    | Ttc3       | + |
| 226  | Cdkn2a <sup>-/-</sup> _HSPCs | LV.SF.LTR | SPLEEN | 16 | 94685717 | - | NM_009441    | Ttc3       | + |

|      |                              |           |        |    |          |   |              |               |   |
|------|------------------------------|-----------|--------|----|----------|---|--------------|---------------|---|
| 191  | Cdkn2a <sup>-/-</sup> _HSPCs | LV.SF.LTR | SPLEEN | 16 | 94905460 | - | NM_001113389 | Dyrk1a        | + |
| 173  | Cdkn2a <sup>-/-</sup> _HSPCs | LV.SF.LTR | SPLEEN | 16 | 95611820 | - | NM_133659    | Erg           | - |
| 191  | Cdkn2a <sup>-/-</sup> _HSPCs | LV.SF.LTR | SPLEEN | 16 | 97297482 | - | NM_031174    | Dscam         | - |
| 182  | Cdkn2a <sup>-/-</sup> _HSPCs | LV.SF.LTR | SPLEEN | 17 | 3149374  | - | NR_003519    | D030013I16Rik | - |
| 180  | Cdkn2a <sup>-/-</sup> _HSPCs | LV.SF.LTR | SPLEEN | 17 | 5114944  | + | NM_001085355 | Arid1b        | + |
| 182  | Cdkn2a <sup>-/-</sup> _HSPCs | LV.SF.LTR | SPLEEN | 17 | 10458239 | - | NM_001159516 | Qk            | - |
| 173  | Cdkn2a <sup>-/-</sup> _HSPCs | LV.SF.LTR | SPLEEN | 17 | 11394679 | - | NM_016694    | Park2         | + |
| 212  | Cdkn2a <sup>-/-</sup> _HSPCs | LV.SF.LTR | SPLEEN | 17 | 15596147 | + | NM_011185    | Psmbl         | - |
| BULK | Cdkn2a <sup>-/-</sup> _HSPCs | LV.SF.LTR | BULK   | 17 | 17080677 | - | NM_025934    | Riok2         | + |
| 180  | Cdkn2a <sup>-/-</sup> _HSPCs | LV.SF.LTR | SPLEEN | 17 | 21159129 | + | NM_145483    | Zfp160        | + |
| 226  | Cdkn2a <sup>-/-</sup> _HSPCs | LV.SF.LTR | SPLEEN | 17 | 25195822 | - | NM_001001183 | Tmem204       | - |
| 173  | Cdkn2a <sup>-/-</sup> _HSPCs | LV.SF.LTR | SPLEEN | 17 | 25268901 | - | NM_011930    | Cln7          | + |
| BULK | Cdkn2a <sup>-/-</sup> _HSPCs | LV.SF.LTR | BULK   | 17 | 30258246 | + | NM_172618    | Btbd9         | - |
| 173  | Cdkn2a <sup>-/-</sup> _HSPCs | LV.SF.LTR | SPLEEN | 17 | 32128485 | + | NM_028244    | Rrp1b         | + |
| 173  | Cdkn2a <sup>-/-</sup> _HSPCs | LV.SF.LTR | SPLEEN | 17 | 33722803 | - | NM_053214    | Myo1f         | + |
| 189  | Cdkn2a <sup>-/-</sup> _HSPCs | LV.SF.LTR | SPLEEN | 17 | 35265393 | + | NM_033477    | D17H6S53E     | + |
| 226  | Cdkn2a <sup>-/-</sup> _HSPCs | LV.SF.LTR | SPLEEN | 17 | 36836493 | + | NM_177636    | H2-M1         | - |
| 226  | Cdkn2a <sup>-/-</sup> _HSPCs | LV.SF.LTR | SPLEEN | 17 | 42944936 | - | NM_009847    | Cd2ap         | - |
| BULK | Cdkn2a <sup>-/-</sup> _HSPCs | LV.SF.LTR | BULK   | 17 | 44112356 | + | NM_009820    | Runx2         | - |
| 182  | Cdkn2a <sup>-/-</sup> _HSPCs | LV.SF.LTR | SPLEEN | 17 | 44879841 | - | NM_001146038 | Runx2         | - |
| 184  | Cdkn2a <sup>-/-</sup> _HSPCs | LV.SF.LTR | SPLEEN | 17 | 44943526 | - | NM_001146038 | Runx2         | - |
| 191  | Cdkn2a <sup>-/-</sup> _HSPCs | LV.SF.LTR | SPLEEN | 17 | 46947432 | + | NM_001100452 | BC032203      | - |
| 226  | Cdkn2a <sup>-/-</sup> _HSPCs | LV.SF.LTR | SPLEEN | 17 | 49160675 | - | NM_027452    | Lrfr2         | + |
| 182  | Cdkn2a <sup>-/-</sup> _HSPCs | LV.SF.LTR | SPLEEN | 17 | 51057657 | - | NM_028162    | Tbc1d5        | - |
| 180  | Cdkn2a <sup>-/-</sup> _HSPCs | LV.SF.LTR | SPLEEN | 17 | 51934489 | + | NM_009122    | Satb1         | - |
| 214  | Cdkn2a <sup>-/-</sup> _HSPCs | LV.SF.LTR | SPLEEN | 17 | 53819652 | - | NM_028232    | Sgol1         | - |
| 226  | Cdkn2a <sup>-/-</sup> _HSPCs | LV.SF.LTR | SPLEEN | 17 | 56164940 | - | NM_013664    | Sh3gl1        | - |
| 226  | Cdkn2a <sup>-/-</sup> _HSPCs | LV.SF.LTR | SPLEEN | 17 | 59067859 | - | NM_027001    | 2610034M16Rik | - |
| 189  | Cdkn2a <sup>-/-</sup> _HSPCs | LV.SF.LTR | SPLEEN | 17 | 59147992 | + | NM_026497    | Nudt12        | - |
| 173  | Cdkn2a <sup>-/-</sup> _HSPCs | LV.SF.LTR | SPLEEN | 17 | 59939661 | - | NM_026497    | Nudt12        | - |
| 191  | Cdkn2a <sup>-/-</sup> _HSPCs | LV.SF.LTR | SPLEEN | 17 | 63704631 | + | NM_010109    | Efna5         | - |

|      |                              |           |        |    |          |   |              |          |   |
|------|------------------------------|-----------|--------|----|----------|---|--------------|----------|---|
| 229  | Cdkn2a <sup>-/-</sup> _HSPCs | LV.SF.LTR | SPLEEN | 17 | 66856434 | - | NM_024448    | Rab12    | - |
| 226  | Cdkn2a <sup>-/-</sup> _HSPCs | LV.SF.LTR | SPLEEN | 17 | 71715706 | - | NM_028887    | Smchd1   | - |
| 189  | Cdkn2a <sup>-/-</sup> _HSPCs | LV.SF.LTR | SPLEEN | 17 | 75030116 | - | NM_007566    | Birc6    | + |
| 180  | Cdkn2a <sup>-/-</sup> _HSPCs | LV.SF.LTR | SPLEEN | 17 | 75947103 | + | NM_133747    | Fam98a   | - |
| 184  | Cdkn2a <sup>-/-</sup> _HSPCs | LV.SF.LTR | BM     | 17 | 80344002 | + | NM_009231    | Sos1     | - |
| 182  | Cdkn2a <sup>-/-</sup> _HSPCs | LV.SF.LTR | BM     | 17 | 80344002 | + | NM_009231    | Sos1     | - |
| 182  | Cdkn2a <sup>-/-</sup> _HSPCs | LV.SF.LTR | SPLEEN | 17 | 80835015 | + | NM_009231    | Sos1     | - |
| 226  | Cdkn2a <sup>-/-</sup> _HSPCs | LV.SF.LTR | SPLEEN | 17 | 80973480 | - | NM_001081357 | Map4k3   | - |
| 271  | Cdkn2a <sup>-/-</sup> _HSPCs | LV.SF.LTR | BM     | 17 | 81751011 | + | NM_011406    | Slc8a1   | - |
| 261  | Cdkn2a <sup>-/-</sup> _HSPCs | LV.SF.LTR | THYMUS | 17 | 81751011 | + | NM_011406    | Slc8a1   | - |
| 192  | Cdkn2a <sup>-/-</sup> _HSPCs | LV.SF.LTR | SPLEEN | 17 | 82242025 | + | NM_001112798 | Slc8a1   | - |
| 226  | Cdkn2a <sup>-/-</sup> _HSPCs | LV.SF.LTR | SPLEEN | 17 | 83826297 | + | NM_001114361 | Eml4     | + |
| BULK | Cdkn2a <sup>-/-</sup> _HSPCs | LV.SF.LTR | BULK   | 17 | 84202515 | - |              | Thada    | - |
| 226  | Cdkn2a <sup>-/-</sup> _HSPCs | LV.SF.LTR | SPLEEN | 17 | 86429527 | - | NM_030133    | Srbd1    | - |
| 230  | Cdkn2a <sup>-/-</sup> _HSPCs | LV.SF.LTR | SPLEEN | 17 | 88007717 | + | NM_008532    | Epcam    | + |
| 226  | Cdkn2a <sup>-/-</sup> _HSPCs | LV.SF.LTR | SPLEEN | 17 | 89501743 | - | NM_013523    | Fshr     | - |
| 230  | Cdkn2a <sup>-/-</sup> _HSPCs | LV.SF.LTR | BM     | 17 | 89734701 | - | XM_001006307 | Kpna2    | - |
| 226  | Cdkn2a <sup>-/-</sup> _HSPCs | LV.SF.LTR | SPLEEN | 17 | 90122753 | + | NM_020252    | Nrxn1    | - |
| 230  | Cdkn2a <sup>-/-</sup> _HSPCs | LV.SF.LTR | SPLEEN | 17 | 90225713 | - | NM_020252    | Nrxn1    | - |
| 180  | Cdkn2a <sup>-/-</sup> _HSPCs | LV.SF.LTR | SPLEEN | 17 | 94608660 | + | NM_176917    | Mettl4   | - |
| 180  | Cdkn2a <sup>-/-</sup> _HSPCs | LV.SF.LTR | SPLEEN | 17 | 94608721 | - | NM_176917    | Mettl4   | - |
| 212  | Cdkn2a <sup>-/-</sup> _HSPCs | LV.SF.LTR | SPLEEN | 18 | 13120388 | - | NM_008378    | Impact   | + |
| 173  | Cdkn2a <sup>-/-</sup> _HSPCs | LV.SF.LTR | SPLEEN | 18 | 14011049 | + | NM_145492    | Zfp521   | - |
| 173  | Cdkn2a <sup>-/-</sup> _HSPCs | LV.SF.LTR | SPLEEN | 18 | 17591937 | - | NM_007664    | Cdh2     | - |
| 226  | Cdkn2a <sup>-/-</sup> _HSPCs | LV.SF.LTR | SPLEEN | 18 | 20250453 | + | NM_013504    | Dsc1     | - |
| 180  | Cdkn2a <sup>-/-</sup> _HSPCs | LV.SF.LTR | SPLEEN | 18 | 21176341 | + | NM_019706    | Rnf138   | + |
| 191  | Cdkn2a <sup>-/-</sup> _HSPCs | LV.SF.LTR | SPLEEN | 18 | 38038376 | + | NM_007858    | Diap1    | - |
| 264  | Cdkn2a <sup>-/-</sup> _HSPCs | LV.SF.LTR | BM     | 18 | 38038811 | - | NM_007858    | Diap1    | - |
| 224  | Cdkn2a <sup>-/-</sup> _HSPCs | LV.SF.LTR | SPLEEN | 18 | 38074059 | - | NM_007858    | Diap1    | - |
| 226  | Cdkn2a <sup>-/-</sup> _HSPCs | LV.SF.LTR | SPLEEN | 18 | 39229279 | - | NM_175164    | Arhgap26 | + |
| BULK | Cdkn2a <sup>-/-</sup> _HSPCs | LV.SF.LTR | BULK   | 18 | 42207785 | + | NM_172966    | Sh3rf2   | + |

|      |                              |           |        |    |          |   |              |               |   |
|------|------------------------------|-----------|--------|----|----------|---|--------------|---------------|---|
| 173  | Cdkn2a <sup>-/-</sup> _HSPCs | LV.SF.LTR | SPLEEN | 18 | 42724749 | + | NM_001039474 | Tcerg1        | + |
| 191  | Cdkn2a <sup>-/-</sup> _HSPCs | LV.SF.LTR | SPLEEN | 18 | 44585213 | - | NM_001085373 | Mcc           | - |
| 212  | Cdkn2a <sup>-/-</sup> _HSPCs | LV.SF.LTR | SPLEEN | 18 | 44745044 | - | NM_001085374 | Mcc           | - |
| 173  | Cdkn2a <sup>-/-</sup> _HSPCs | LV.SF.LTR | SPLEEN | 18 | 45008396 | - | NM_001085373 | Mcc           | - |
| 173  | Cdkn2a <sup>-/-</sup> _HSPCs | LV.SF.LTR | SPLEEN | 18 | 52246329 | + | NM_026286    | Ftmt          | + |
| 173  | Cdkn2a <sup>-/-</sup> _HSPCs | LV.SF.LTR | SPLEEN | 18 | 56099239 | + | NM_026240    | Gramd3        | + |
| 173  | Cdkn2a <sup>-/-</sup> _HSPCs | LV.SF.LTR | SPLEEN | 18 | 56727601 | + | NM_001127338 | Aldh7a1       | - |
| 173  | Cdkn2a <sup>-/-</sup> _HSPCs | LV.SF.LTR | SPLEEN | 18 | 58091116 | + | NM_009194    | Slc12a2       | + |
| 189  | Cdkn2a <sup>-/-</sup> _HSPCs | LV.SF.LTR | SPLEEN | 18 | 58739602 | - | NM_001081072 | Slc27a6       | + |
| 224  | Cdkn2a <sup>-/-</sup> _HSPCs | LV.SF.LTR | SPLEEN | 18 | 61747596 | - | NM_146087    | Csnk1a1       | + |
| 226  | Cdkn2a <sup>-/-</sup> _HSPCs | LV.SF.LTR | SPLEEN | 18 | 70612758 | - | NM_172967    | 4930503L19Rik | - |
| 229  | Cdkn2a <sup>-/-</sup> _HSPCs | LV.SF.LTR | SPLEEN | 18 | 79283955 | + | NM_053099    | Setbp1        | - |
| 191  | Cdkn2a <sup>-/-</sup> _HSPCs | LV.SF.LTR | SPLEEN | 18 | 81042968 | - | NM_015805    | Atp9b         | - |
| 191  | Cdkn2a <sup>-/-</sup> _HSPCs | LV.SF.LTR | SPLEEN | 18 | 82725632 | + | NM_001025254 | Mbp           | + |
| 214  | Cdkn2a <sup>-/-</sup> _HSPCs | LV.SF.LTR | SPLEEN | 18 | 84180044 | - | NM_001081300 | Tshz1         | - |
| 173  | Cdkn2a <sup>-/-</sup> _HSPCs | LV.SF.LTR | SPLEEN | 18 | 85042359 | + | NM_025797    | Cyb5          | + |
| 212  | Cdkn2a <sup>-/-</sup> _HSPCs | LV.SF.LTR | SPLEEN | 18 | 87474567 | + | NM_172633    | Cbln2         | + |
| 173  | Cdkn2a <sup>-/-</sup> _HSPCs | LV.SF.LTR | SPLEEN | 18 | 88229383 | - | NM_018821    | Socs6         | - |
| 263  | Cdkn2a <sup>-/-</sup> _HSPCs | LV.SF.LTR | BM     | 18 | 89832319 | + | NM_001039173 | Dok6          | - |
| 212  | Cdkn2a <sup>-/-</sup> _HSPCs | LV.SF.LTR | SPLEEN | 19 | 3333458  | + | NM_013495    | Cpt1a         | + |
| 184  | Cdkn2a <sup>-/-</sup> _HSPCs | LV.SF.LTR | SPLEEN | 19 | 7396317  | + | NM_001080388 | Mark2         | - |
| BULK | Cdkn2a <sup>-/-</sup> _HSPCs | LV.SF.LTR | BULK   | 19 | 11119412 | + |              | AW112010      | - |
| 182  | Cdkn2a <sup>-/-</sup> _HSPCs | LV.SF.LTR | SPLEEN | 19 | 14400000 | - | NM_011600    | Tle4          | - |
| 226  | Cdkn2a <sup>-/-</sup> _HSPCs | LV.SF.LTR | SPLEEN | 19 | 16819853 | - | NM_173028    | Vps13a        | - |
| 191  | Cdkn2a <sup>-/-</sup> _HSPCs | LV.SF.LTR | SPLEEN | 19 | 21734853 | + | NM_146096    | Fam108b       | + |
| 191  | Cdkn2a <sup>-/-</sup> _HSPCs | LV.SF.LTR | SPLEEN | 19 | 21734915 | - | NM_146096    | Fam108b       | + |
| 226  | Cdkn2a <sup>-/-</sup> _HSPCs | LV.SF.LTR | SPLEEN | 19 | 23799176 | + | NM_177034    | Apba1         | + |
| BULK | Cdkn2a <sup>-/-</sup> _HSPCs | LV.SF.LTR | BULK   | 19 | 26744615 | - | NM_011416    | Smarca2       | + |
| 262  | Cdkn2a <sup>-/-</sup> _HSPCs | LV.SF.LTR | BM     | 19 | 26884163 | + | NM_011416    | Smarca2       | + |
| 226  | Cdkn2a <sup>-/-</sup> _HSPCs | LV.SF.LTR | SPLEEN | 19 | 31415043 | + | NM_011160    | Prkg1         | - |
| 184  | Cdkn2a <sup>-/-</sup> _HSPCs | LV.SF.LTR | SPLEEN | 19 | 36944162 | - | NM_028263    | Fgfbp3        | - |

|      |                              |           |        |    |          |   |              |               |   |
|------|------------------------------|-----------|--------|----|----------|---|--------------|---------------|---|
| 269  | Cdkn2a <sup>-/-</sup> _HSPCs | LV.SF.LTR | SPLEEN | 19 | 37428297 | + | NM_010615    | Kif11         | + |
| 226  | Cdkn2a <sup>-/-</sup> _HSPCs | LV.SF.LTR | SPLEEN | 19 | 40394323 | + | NM_001034962 | Sorbs1        | - |
| 229  | Cdkn2a <sup>-/-</sup> _HSPCs | LV.SF.LTR | SPLEEN | 19 | 41610137 | - | NM_172154    | Lcor          | + |
| 255  | Cdkn2a <sup>-/-</sup> _HSPCs | LV.SF.LTR | BM     | 19 | 43635234 | - | NM_008699    | Nkx2-3        | + |
| 191  | Cdkn2a <sup>-/-</sup> _HSPCs | LV.SF.LTR | SPLEEN | 19 | 46991234 | + | NM_029810    | Nt5c2         | - |
| BULK | Cdkn2a <sup>-/-</sup> _HSPCs | LV.SF.LTR | BULK   | 19 | 47671393 | + | NM_009289    | Slk           | + |
| 180  | Cdkn2a <sup>-/-</sup> _HSPCs | LV.SF.LTR | SPLEEN | 19 | 50426871 | - | NM_021377    | Sorcs1        | - |
| 230  | Cdkn2a <sup>-/-</sup> _HSPCs | LV.SF.LTR | SPLEEN | 19 | 50787912 | + | NM_021377    | Sorcs1        | - |
| 184  | Cdkn2a <sup>-/-</sup> _HSPCs | LV.SF.LTR | BM     | 19 | 53627540 | - | NM_007790    | Smc3          | + |
| 182  | Cdkn2a <sup>-/-</sup> _HSPCs | LV.SF.LTR | BM     | 19 | 53627540 | - | NM_007790    | Smc3          | + |
| 184  | Cdkn2a <sup>-/-</sup> _HSPCs | LV.SF.LTR | SPLEEN | 19 | 53648718 | - | NM_007790    | Smc3          | + |
| 226  | Cdkn2a <sup>-/-</sup> _HSPCs | LV.SF.LTR | SPLEEN | 19 | 55415253 | - | NM_016862    | Vt1a          | + |
| 274  | Cdkn2a <sup>-/-</sup> _HSPCs | LV.SF.LTR | BM     | 19 | 55800134 | + | NM_009333    | Tcf7l2        | + |
| 173  | Cdkn2a <sup>-/-</sup> _HSPCs | LV.SF.LTR | SPLEEN | 19 | 56649179 | + | NM_025811    | Nhlrc2        | + |
| 191  | Cdkn2a <sup>-/-</sup> _HSPCs | LV.SF.LTR | SPLEEN | 19 | 57690872 | - | NM_181415    | Atrnl1        | + |
| 177  | Cdkn2a <sup>-/-</sup> _HSPCs | LV.SF.LTR | SPLEEN | 19 | 57706412 | + | NM_181415    | Atrnl1        | + |
| 180  | Cdkn2a <sup>-/-</sup> _HSPCs | LV.SF.LTR | SPLEEN | X  | 7746406  | - | NM_172478    | Tbc1d25       | - |
| 226  | Cdkn2a <sup>-/-</sup> _HSPCs | LV.SF.LTR | SPLEEN | X  | 18262453 | + | NM_175228    | 4930578C19Rik | - |
| 192  | Cdkn2a <sup>-/-</sup> _HSPCs | LV.SF.LTR | SPLEEN | X  | 19854310 | + | NM_177353    | Slc9a7        | - |
| 180  | Cdkn2a <sup>-/-</sup> _HSPCs | LV.SF.LTR | SPLEEN | X  | 21163242 | - | NM_007429    | Agtr2         | + |
| 224  | Cdkn2a <sup>-/-</sup> _HSPCs | LV.SF.LTR | SPLEEN | X  | 22905044 | - | NM_026167    | Klhl13        | - |
| 213  | Cdkn2a <sup>-/-</sup> _HSPCs | LV.SF.LTR | SPLEEN | X  | 23257244 | + | NM_175180    | Wdr44         | + |
| 226  | Cdkn2a <sup>-/-</sup> _HSPCs | LV.SF.LTR | SPLEEN | X  | 33446956 | + | NM_001009947 | Dock11        | + |
| 226  | Cdkn2a <sup>-/-</sup> _HSPCs | LV.SF.LTR | SPLEEN | X  | 35366415 | - | NM_001034856 | 4930430D24Rik | - |
| 226  | Cdkn2a <sup>-/-</sup> _HSPCs | LV.SF.LTR | SPLEEN | X  | 35889340 | - | NM_001110142 | Cul4b         | - |
| 191  | Cdkn2a <sup>-/-</sup> _HSPCs | LV.SF.LTR | SPLEEN | X  | 37042111 | + | NM_183126    | 6030498E09Rik | + |
| 180  | Cdkn2a <sup>-/-</sup> _HSPCs | LV.SF.LTR | SPLEEN | X  | 39620250 | + | NM_001077712 | Stag2         | + |
| 191  | Cdkn2a <sup>-/-</sup> _HSPCs | LV.SF.LTR | SPLEEN | X  | 41717605 | + | NM_175539    | Wdr40c        | - |
| 189  | Cdkn2a <sup>-/-</sup> _HSPCs | LV.SF.LTR | SPLEEN | X  | 54561273 | - | NM_152801    | Arhgef6       | - |
| 189  | Cdkn2a <sup>-/-</sup> _HSPCs | LV.SF.LTR | SPLEEN | X  | 57004499 | - | NM_007979    | F9            | + |
| 212  | Cdkn2a <sup>-/-</sup> _HSPCs | LV.SF.LTR | SPLEEN | X  | 57652894 | + | NM_001001798 | Atp11c        | - |

|      |                              |                  |        |   |           |   |              |               |   |
|------|------------------------------|------------------|--------|---|-----------|---|--------------|---------------|---|
| 212  | Cdkn2a <sup>-/-</sup> _HSPCs | LV.SF.LTR        | SPLEEN | X | 66569176  | + | NM_008032    | Aff2          | + |
| 189  | Cdkn2a <sup>-/-</sup> _HSPCs | LV.SF.LTR        | SPLEEN | X | 69071902  | + | NM_001081356 | 2610030H06Rik | - |
| 180  | Cdkn2a <sup>-/-</sup> _HSPCs | LV.SF.LTR        | SPLEEN | X | 70172771  | + | NM_010941    | Nsdhl         | + |
| 191  | Cdkn2a <sup>-/-</sup> _HSPCs | LV.SF.LTR        | SPLEEN | X | 72634131  | + | NM_026126    | Fundc2        | + |
| 173  | Cdkn2a <sup>-/-</sup> _HSPCs | LV.SF.LTR        | SPLEEN | X | 72691465  | - | NM_145956    | Brcc3         | + |
| 180  | Cdkn2a <sup>-/-</sup> _HSPCs | LV.SF.LTR        | SPLEEN | X | 72771237  | - | NM_011692    | Vbp1          | + |
| 191  | Cdkn2a <sup>-/-</sup> _HSPCs | LV.SF.LTR        | SPLEEN | X | 79166915  | + | NM_173435    | 4930595M18Rik | - |
| 226  | Cdkn2a <sup>-/-</sup> _HSPCs | LV.SF.LTR        | SPLEEN | X | 81047471  | - | NM_007868    | Dmd           | + |
| 180  | Cdkn2a <sup>-/-</sup> _HSPCs | LV.SF.LTR        | SPLEEN | X | 90781103  | - | NM_008892    | Pola1         | - |
| 189  | Cdkn2a <sup>-/-</sup> _HSPCs | LV.SF.LTR        | SPLEEN | X | 91148977  | - | NM_145630    | Pdk3          | - |
| 226  | Cdkn2a <sup>-/-</sup> _HSPCs | LV.SF.LTR        | SPLEEN | X | 96143253  | + | NM_207633    | Yipf6         | + |
| BULK | Cdkn2a <sup>-/-</sup> _HSPCs | LV.SF.LTR        | BULK   | X | 100176340 | + | NM_011276    | Rnf12         | - |
| 212  | Cdkn2a <sup>-/-</sup> _HSPCs | LV.SF.LTR        | SPLEEN | X | 103086748 | + | NM_009530    | Atrx          | - |
| 184  | Cdkn2a <sup>-/-</sup> _HSPCs | LV.SF.LTR        | SPLEEN | X | 103094497 | - | NM_009530    | Atrx          | - |
| 180  | Cdkn2a <sup>-/-</sup> _HSPCs | LV.SF.LTR        | SPLEEN | X | 104485904 | - | NM_001033251 | Gpr174        | + |
| 189  | Cdkn2a <sup>-/-</sup> _HSPCs | LV.SF.LTR        | SPLEEN | X | 105034820 | - | NM_025921    | 2610002M06Rik | - |
| 191  | Cdkn2a <sup>-/-</sup> _HSPCs | LV.SF.LTR        | SPLEEN | X | 109432828 | - | NM_026565    | Apool         | + |
| 270  | Cdkn2a <sup>-/-</sup> _HSPCs | LV.SF.LTR        | BM     | X | 109852822 | + | NM_033605    | Dach2         | + |
| 226  | Cdkn2a <sup>-/-</sup> _HSPCs | LV.SF.LTR        | SPLEEN | X | 131506814 | + | NM_175446    | Zmat1         | - |
| 180  | Cdkn2a <sup>-/-</sup> _HSPCs | LV.SF.LTR        | SPLEEN | X | 136258497 | - | NM_001081499 | Tbc1d8b       | + |
| 189  | Cdkn2a <sup>-/-</sup> _HSPCs | LV.SF.LTR        | SPLEEN | X | 139016491 | - | NM_177592    | Tmem164       | + |
| 224  | Cdkn2a <sup>-/-</sup> _HSPCs | LV.SF.LTR        | SPLEEN | X | 152597271 | - | NM_001093750 | Ptchd1        | - |
| 265  | Cdkn2a <sup>-/-</sup> _HSPCs | LV.SF.LTR        | BM     | X | 154605441 | - | NM_148945    | Rps6ka3       | + |
| 214  | Cdkn2a <sup>-/-</sup> _HSPCs | LV.SF.LTR        | SPLEEN | X | 161456030 | + | NM_001146081 | Fancb         | + |
| 173  | Cdkn2a <sup>-/-</sup> _HSPCs | LV.SF.LTR        | SPLEEN | X | 163615117 | + | NM_021278    | Tmsb4x        | - |
| 182  | Cdkn2a <sup>-/-</sup> _HSPCs | LV.SF.LTR        | BM     | X | 164545671 | - | NM_009707    | arhgap6       | + |
| 184  | Cdkn2a <sup>-/-</sup> _HSPCs | LV.SF.LTR        | BM     | X | 164545671 | - | NM_009707    | arhgap6       | + |
| 182  | Cdkn2a <sup>-/-</sup> _HSPCs | LV.SF.LTR        | SPLEEN | X | 165639498 | - | NM_009707    | Arhgap6       | + |
| 177  | Cdkn2a <sup>-/-</sup> _HSPCs | LV.SF.LTR        | SPLEEN | Y | 252364    | - | NM_011419    | Kdm5d         | + |
| BULK | Cdkn2a <sup>-/-</sup> _HSPCs | SINLV.SF.GFP.PRE | BULK   | 1 | 5084370   | + | NM_133826    | Atp6v1h       | + |
| 219  | Cdkn2a <sup>-/-</sup> _HSPCs | SINLV.SF.GFP.PRE | SPLEEN | 1 | 6850587   | - | NM_173868    | St18          | + |

|      |                              |                  |             |   |          |   |              |               |   |
|------|------------------------------|------------------|-------------|---|----------|---|--------------|---------------|---|
| 222  | Cdkn2a <sup>-/-</sup> _HSPCs | SINLV.SF.GFP.PRE | SPLEEN      | 1 | 7463095  | + | NM_183028    | Pcmt1         | + |
| 190  | Cdkn2a <sup>-/-</sup> _HSPCs | SINLV.SF.GFP.PRE | SPLEEN      | 1 | 7486221  | + | NM_183028    | Pcmt1         | + |
| 222  | Cdkn2a <sup>-/-</sup> _HSPCs | SINLV.SF.GFP.PRE | BM          | 1 | 7490482  | + | NM_183028    | Pcmt1         | + |
| 198  | Cdkn2a <sup>-/-</sup> _HSPCs | SINLV.SF.GFP.PRE | BM - SPLEEN | 1 | 10995965 | + | NM_029525    | Prex2         | + |
| 175  | Cdkn2a <sup>-/-</sup> _HSPCs | SINLV.SF.GFP.PRE | BM          | 1 | 13310430 | + | NM_001077695 | Ncoa2         | - |
| 198  | Cdkn2a <sup>-/-</sup> _HSPCs | SINLV.SF.GFP.PRE | BM - SPLEEN | 1 | 15799527 | + | NM_009352    | Terf1         | + |
| 198  | Cdkn2a <sup>-/-</sup> _HSPCs | SINLV.SF.GFP.PRE | BM - SPLEEN | 1 | 15811386 | - | NM_009352    | Terf1         | + |
| 198  | Cdkn2a <sup>-/-</sup> _HSPCs | SINLV.SF.GFP.PRE | SPLEEN      | 1 | 16658202 | - | NM_026392    | Tmem70        | + |
| 237  | Cdkn2a <sup>-/-</sup> _HSPCs | SINLV.SF.GFP.PRE | BM          | 1 | 20951384 | + | NM_028829    | Paqr8         | + |
| 198  | Cdkn2a <sup>-/-</sup> _HSPCs | SINLV.SF.GFP.PRE | BM          | 1 | 21547749 | - | NM_001160139 | Kcnq5         | - |
| 198  | Cdkn2a <sup>-/-</sup> _HSPCs | SINLV.SF.GFP.PRE | SPLEEN      | 1 | 23279954 | + | NM_001081079 | Ogfr1         | - |
| 198  | Cdkn2a <sup>-/-</sup> _HSPCs | SINLV.SF.GFP.PRE | SPLEEN      | 1 | 24581118 | - | NM_007733    | Col19a1       | - |
| BULK | Cdkn2a <sup>-/-</sup> _HSPCs | SINLV.SF.GFP.PRE | BULK        | 1 | 24650586 | - | NM_026719    | Lmbrd1        | + |
| 210  | Cdkn2a <sup>-/-</sup> _HSPCs | SINLV.SF.GFP.PRE | SPLEEN      | 1 | 27644715 | + | NM_001033764 | 4931408C20Rik | - |
| 210  | Cdkn2a <sup>-/-</sup> _HSPCs | SINLV.SF.GFP.PRE | SPLEEN      | 1 | 31722490 | + | NR_015347    | Gm4850        | + |
| BULK | Cdkn2a <sup>-/-</sup> _HSPCs | SINLV.SF.GFP.PRE | BULK        | 1 | 34474898 | - | NM_007685    | Cfc1          | + |
| 227  | Cdkn2a <sup>-/-</sup> _HSPCs | SINLV.SF.GFP.PRE | SPLEEN      | 1 | 37067657 | + | NM_018872    | Tmem131       | - |
| 222  | Cdkn2a <sup>-/-</sup> _HSPCs | SINLV.SF.GFP.PRE | BM - SPLEEN | 1 | 42287373 | - | NM_008900    | Pou3f3        | + |
| 175  | Cdkn2a <sup>-/-</sup> _HSPCs | SINLV.SF.GFP.PRE | BM          | 1 | 44012202 | - | NM_009418    | Tpp2          | + |
| 219  | Cdkn2a <sup>-/-</sup> _HSPCs | SINLV.SF.GFP.PRE | SPLEEN      | 1 | 46887074 | - | NM_172653    | Slc39a10      | - |
| 236  | Cdkn2a <sup>-/-</sup> _HSPCs | SINLV.SF.GFP.PRE | BM          | 1 | 47446320 | - | NM_172653    | Slc39a10      | - |
| 175  | Cdkn2a <sup>-/-</sup> _HSPCs | SINLV.SF.GFP.PRE | BM          | 1 | 48129934 | + | NM_172653    | Slc39a10      | - |
| 175  | Cdkn2a <sup>-/-</sup> _HSPCs | SINLV.SF.GFP.PRE | BM          | 1 | 48129996 | - | NM_172653    | Slc39a10      | - |
| 227  | Cdkn2a <sup>-/-</sup> _HSPCs | SINLV.SF.GFP.PRE | SPLEEN      | 1 | 49023492 | - | NM_019790    | Tmeff2        | + |
| 190  | Cdkn2a <sup>-/-</sup> _HSPCs | SINLV.SF.GFP.PRE | SPLEEN      | 1 | 51564062 | - | NM_028696    | Obfc2a        | + |
| BULK | Cdkn2a <sup>-/-</sup> _HSPCs | SINLV.SF.GFP.PRE | BULK        | 1 | 52603445 | + | NM_133829    | 2210010L05Rik | - |
| 222  | Cdkn2a <sup>-/-</sup> _HSPCs | SINLV.SF.GFP.PRE | BM - SPLEEN | 1 | 53401474 | - | NM_133728    | Asnsd1        | - |
| 198  | Cdkn2a <sup>-/-</sup> _HSPCs | SINLV.SF.GFP.PRE | BM - SPLEEN | 1 | 55050320 | + | NM_031179    | Sf3b1         | - |
| 175  | Cdkn2a <sup>-/-</sup> _HSPCs | SINLV.SF.GFP.PRE | BM          | 1 | 55148511 | + | NM_008303    | Hspe1         | + |
| BULK | Cdkn2a <sup>-/-</sup> _HSPCs | SINLV.SF.GFP.PRE | BULK        | 1 | 56956367 | - | NM_139146    | Satb2         | - |
| 175  | Cdkn2a <sup>-/-</sup> _HSPCs | SINLV.SF.GFP.PRE | BM          | 1 | 64614198 | + | NM_001037726 | Creb1         | + |

|      |                              |                  |        |   |           |   |              |               |   |
|------|------------------------------|------------------|--------|---|-----------|---|--------------|---------------|---|
| 210  | Cdkn2a <sup>-/-</sup> _HSPCs | SINLV.SF.GFP.PRE | SPLEEN | 1 | 64624994  | - | NM_001037726 | Creb1         | + |
| 222  | Cdkn2a <sup>-/-</sup> _HSPCs | SINLV.SF.GFP.PRE | SPLEEN | 1 | 66780050  | + | NM_001122738 | 1110028C15Rik | + |
| 215  | Cdkn2a <sup>-/-</sup> _HSPCs | SINLV.SF.GFP.PRE | BM     | 1 | 66828752  | + | NM_001122738 | 1110028C15Rik | + |
| 186  | Cdkn2a <sup>-/-</sup> _HSPCs | SINLV.SF.GFP.PRE | BM     | 1 | 66934473  | - | NM_007381    | Acadl         | - |
| 206  | Cdkn2a <sup>-/-</sup> _HSPCs | SINLV.SF.GFP.PRE | BM     | 1 | 68632148  | - | NM_010154    | ErbB4         | - |
| 206  | Cdkn2a <sup>-/-</sup> _HSPCs | SINLV.SF.GFP.PRE | BM     | 1 | 68745386  | + | NM_010154    | ErbB4         | - |
| 206  | Cdkn2a <sup>-/-</sup> _HSPCs | SINLV.SF.GFP.PRE | BM     | 1 | 68745537  | - | NM_010154    | ErbB4         | - |
| 198  | Cdkn2a <sup>-/-</sup> _HSPCs | SINLV.SF.GFP.PRE | SPLEEN | 1 | 69629768  | - | NM_011770    | Ikzf2         | - |
| 237  | Cdkn2a <sup>-/-</sup> _HSPCs | SINLV.SF.GFP.PRE | BM     | 1 | 71652102  | + | NM_010233    | Fn1           | - |
| BULK | Cdkn2a <sup>-/-</sup> _HSPCs | SINLV.SF.GFP.PRE | BULK   | 1 | 77110364  | + | NM_007936    | Epha4         | - |
| 198  | Cdkn2a <sup>-/-</sup> _HSPCs | SINLV.SF.GFP.PRE | SPLEEN | 1 | 80217384  | - | NM_173425    | Fam124b       | - |
| 215  | Cdkn2a <sup>-/-</sup> _HSPCs | SINLV.SF.GFP.PRE | BM     | 1 | 82578759  | - | NM_007734    | Col4a3        | + |
| 215  | Cdkn2a <sup>-/-</sup> _HSPCs | SINLV.SF.GFP.PRE | BM     | 1 | 82696308  | - | NM_007734    | Col4a3        | + |
| 194  | Cdkn2a <sup>-/-</sup> _HSPCs | SINLV.SF.GFP.PRE | BM     | 1 | 84711637  | - | NM_133975    | Trip12        | - |
| 194  | Cdkn2a <sup>-/-</sup> _HSPCs | SINLV.SF.GFP.PRE | BM     | 1 | 84829187  | - | NM_133975    | Trip12        | - |
| 210  | Cdkn2a <sup>-/-</sup> _HSPCs | SINLV.SF.GFP.PRE | SPLEEN | 1 | 88709003  | - | NM_153530    | Dis3l2        | + |
| 210  | Cdkn2a <sup>-/-</sup> _HSPCs | SINLV.SF.GFP.PRE | SPLEEN | 1 | 89116107  | - | NM_001039169 | Eif4e2        | + |
| 175  | Cdkn2a <sup>-/-</sup> _HSPCs | SINLV.SF.GFP.PRE | BM     | 1 | 89276029  | - | NM_001110212 | Gigyf2        | + |
| 175  | Cdkn2a <sup>-/-</sup> _HSPCs | SINLV.SF.GFP.PRE | BM     | 1 | 90454271  | - | NM_008132    | Glrp1         | - |
| 190  | Cdkn2a <sup>-/-</sup> _HSPCs | SINLV.SF.GFP.PRE | SPLEEN | 1 | 90549544  | - | NM_177305    | Arl4c         | - |
| 222  | Cdkn2a <sup>-/-</sup> _HSPCs | SINLV.SF.GFP.PRE | SPLEEN | 1 | 96600313  | - | NM_026321    | Fam174a       | + |
| 175  | Cdkn2a <sup>-/-</sup> _HSPCs | SINLV.SF.GFP.PRE | BM     | 1 | 101871901 | - | NM_172851    | Cntnap5b      | + |
| BULK | Cdkn2a <sup>-/-</sup> _HSPCs | SINLV.SF.GFP.PRE | BULK   | 1 | 108430811 | + | NM_009741    | Bcl2          | - |
| 198  | Cdkn2a <sup>-/-</sup> _HSPCs | SINLV.SF.GFP.PRE | SPLEEN | 1 | 108830051 | + | NM_027971    | Serp1b12      | + |
| 190  | Cdkn2a <sup>-/-</sup> _HSPCs | SINLV.SF.GFP.PRE | SPLEEN | 1 | 110347103 | - | NM_011459    | Serp1b8       | + |
| 219  | Cdkn2a <sup>-/-</sup> _HSPCs | SINLV.SF.GFP.PRE | SPLEEN | 1 | 120391735 | - | NM_001081276 | Clasp1        | + |
| 194  | Cdkn2a <sup>-/-</sup> _HSPCs | SINLV.SF.GFP.PRE | BM     | 1 | 124024762 | - | NM_025860    | Ddx18         | - |
| 194  | Cdkn2a <sup>-/-</sup> _HSPCs | SINLV.SF.GFP.PRE | BM     | 1 | 126375387 | - | NM_199021    | Dpp10         | - |
| 217  | Cdkn2a <sup>-/-</sup> _HSPCs | SINLV.SF.GFP.PRE | BM     | 1 | 129767060 | - | NM_178690    | Rab3gap1      | + |
| 237  | Cdkn2a <sup>-/-</sup> _HSPCs | SINLV.SF.GFP.PRE | BM     | 1 | 139799057 | - | NM_001111316 | Ptprc         | - |
| 198  | Cdkn2a <sup>-/-</sup> _HSPCs | SINLV.SF.GFP.PRE | BM     | 1 | 145501190 | + | NM_145991    | Cdc73         | - |



|      |                              |                  |             |   |           |   |              |               |   |
|------|------------------------------|------------------|-------------|---|-----------|---|--------------|---------------|---|
| 198  | Cdkn2a <sup>-/-</sup> _HSPCs | SINLV.SF.GFP.PRE | SPLEEN      | 1 | 145633187 | - | NM_001159866 | Uchl5         | + |
| 222  | Cdkn2a <sup>-/-</sup> _HSPCs | SINLV.SF.GFP.PRE | SPLEEN      | 1 | 145649922 | + | NM_001159866 | Uchl5         | + |
| 175  | Cdkn2a <sup>-/-</sup> _HSPCs | SINLV.SF.GFP.PRE | BM          | 1 | 146222575 | - | NM_015811    | Rgs1          | - |
| 220  | Cdkn2a <sup>-/-</sup> _HSPCs | SINLV.SF.GFP.PRE | BM          | 1 | 150790935 | - | NM_008869    | Pla2g4a       | - |
| 175  | Cdkn2a <sup>-/-</sup> _HSPCs | SINLV.SF.GFP.PRE | BM          | 1 | 159251608 | - | NM_177644    | Rasal2        | - |
| 198  | Cdkn2a <sup>-/-</sup> _HSPCs | SINLV.SF.GFP.PRE | SPLEEN      | 1 | 161248542 | - | NM_011931    | Rfwd2         | + |
| 237  | Cdkn2a <sup>-/-</sup> _HSPCs | SINLV.SF.GFP.PRE | BM          | 1 | 162840846 | - | NM_001024952 | Re3h1         | + |
| 174  | Cdkn2a <sup>-/-</sup> _HSPCs | SINLV.SF.GFP.PRE | SPLEEN      | 1 | 162845521 | + | NM_001024952 | Re3h1         | + |
| 198  | Cdkn2a <sup>-/-</sup> _HSPCs | SINLV.SF.GFP.PRE | BM          | 1 | 172951764 | - | NM_144559    | Fcgr4         | + |
| 220  | Cdkn2a <sup>-/-</sup> _HSPCs | SINLV.SF.GFP.PRE | BM          | 1 | 181262583 | + | NM_027188    | smyd3         | - |
| BULK | Cdkn2a <sup>-/-</sup> _HSPCs | SINLV.SF.GFP.PRE | BULK        | 1 | 181943317 | + |              | Cdc42bpa      | + |
| 198  | Cdkn2a <sup>-/-</sup> _HSPCs | SINLV.SF.GFP.PRE | BM - SPLEEN | 1 | 189069172 | + | NM_026367    | Gpatch2       | + |
| 215  | Cdkn2a <sup>-/-</sup> _HSPCs | SINLV.SF.GFP.PRE | BM          | 1 | 189741621 | - | NM_011935    | Esrrg         | + |
| 206  | Cdkn2a <sup>-/-</sup> _HSPCs | SINLV.SF.GFP.PRE | BM          | 1 | 189778450 | + | NM_011935    | Esrrg         | + |
| 215  | Cdkn2a <sup>-/-</sup> _HSPCs | SINLV.SF.GFP.PRE | BM          | 1 | 189864709 | - | NM_011935    | Esrrg         | + |
| BULK | Cdkn2a <sup>-/-</sup> _HSPCs | SINLV.SF.GFP.PRE | BULK        | 2 | 3418490   | - | NM_015765    | Hspa14        | - |
| 222  | Cdkn2a <sup>-/-</sup> _HSPCs | SINLV.SF.GFP.PRE | SPLEEN      | 2 | 5947384   | - | NM_001081132 | Upf2          | + |
| 215  | Cdkn2a <sup>-/-</sup> _HSPCs | SINLV.SF.GFP.PRE | BM          | 2 | 7153337   | - | NM_001110232 | Cugbp2        | - |
| 238  | Cdkn2a <sup>-/-</sup> _HSPCs | SINLV.SF.GFP.PRE | SPLEEN      | 2 | 9424882   | + | NM_008091    | Gata3         | - |
| 238  | Cdkn2a <sup>-/-</sup> _HSPCs | SINLV.SF.GFP.PRE | SPLEEN      | 2 | 9428656   | + | NM_008091    | Gata3         | - |
| 238  | Cdkn2a <sup>-/-</sup> _HSPCs | SINLV.SF.GFP.PRE | SPLEEN      | 2 | 9926332   | + | NM_027748    | Taf3          | - |
| 194  | Cdkn2a <sup>-/-</sup> _HSPCs | SINLV.SF.GFP.PRE | BM          | 2 | 12330693  | + | NM_024185    | 2310047O13Rik | - |
| 175  | Cdkn2a <sup>-/-</sup> _HSPCs | SINLV.SF.GFP.PRE | BM          | 2 | 12799617  | - | NM_008961    | Pter          | + |
| 198  | Cdkn2a <sup>-/-</sup> _HSPCs | SINLV.SF.GFP.PRE | SPLEEN      | 2 | 18210472  | + | NM_007869    | Dnajc1        | - |
| 198  | Cdkn2a <sup>-/-</sup> _HSPCs | SINLV.SF.GFP.PRE | SPLEEN      | 2 | 22802838  | + | NM_001077190 | Abi1          | - |
| 198  | Cdkn2a <sup>-/-</sup> _HSPCs | SINLV.SF.GFP.PRE | SPLEEN      | 2 | 27383794  | - | NM_080848    | Wdr5          | + |
| 175  | Cdkn2a <sup>-/-</sup> _HSPCs | SINLV.SF.GFP.PRE | BM          | 2 | 29830512  | - | NM_001076554 | Spna2         | + |
| 217  | Cdkn2a <sup>-/-</sup> _HSPCs | SINLV.SF.GFP.PRE | BM          | 2 | 43441892  | + | NM_027552    | Kynu          | + |
| 198  | Cdkn2a <sup>-/-</sup> _HSPCs | SINLV.SF.GFP.PRE | SPLEEN      | 2 | 43635084  | - | NM_001025377 | Arhgap15      | + |
| 198  | Cdkn2a <sup>-/-</sup> _HSPCs | SINLV.SF.GFP.PRE | BM          | 2 | 44700794  | - | NM_172662    | Gtdc1         | - |
| 198  | Cdkn2a <sup>-/-</sup> _HSPCs | SINLV.SF.GFP.PRE | SPLEEN      | 2 | 44767292  | - | NM_172662    | Gtdc1         | - |

|      |                              |                  |             |   |           |   |              |               |   |
|------|------------------------------|------------------|-------------|---|-----------|---|--------------|---------------|---|
| 207  | Cdkn2a <sup>-/-</sup> _HSPCs | SINLV.SF.GFP.PRE | SPLEEN      | 2 | 51949173  | - | NM_175238    | Rif1          | + |
| 222  | Cdkn2a <sup>-/-</sup> _HSPCs | SINLV.SF.GFP.PRE | BM - SPLEEN | 2 | 53037274  | - | NM_018785    | Prpf40a       | - |
| 237  | Cdkn2a <sup>-/-</sup> _HSPCs | SINLV.SF.GFP.PRE | BM          | 2 | 56739308  | - | NM_001139509 | Nr4a2         | - |
| 209  | Cdkn2a <sup>-/-</sup> _HSPCs | SINLV.SF.GFP.PRE | THYMUS      | 2 | 58018992  | + | NM_139200    | Pscdbp        | - |
| 198  | Cdkn2a <sup>-/-</sup> _HSPCs | SINLV.SF.GFP.PRE | BM          | 2 | 58036135  | + | NM_139200    | Cytip         | - |
| 198  | Cdkn2a <sup>-/-</sup> _HSPCs | SINLV.SF.GFP.PRE | BM - SPLEEN | 2 | 58036232  | - | NM_139200    | Cytip         | - |
| 198  | Cdkn2a <sup>-/-</sup> _HSPCs | SINLV.SF.GFP.PRE | SPLEEN      | 2 | 65968901  | - | NM_015736    | Galnt3        | - |
| 206  | Cdkn2a <sup>-/-</sup> _HSPCs | SINLV.SF.GFP.PRE | BM          | 2 | 70528811  | + | NM_172664    | Ttk1          | - |
| 206  | Cdkn2a <sup>-/-</sup> _HSPCs | SINLV.SF.GFP.PRE | BM          | 2 | 70566029  | + | NM_172664    | Ttk1          | - |
| 198  | Cdkn2a <sup>-/-</sup> _HSPCs | SINLV.SF.GFP.PRE | BM - SPLEEN | 2 | 79731821  | - | NM_001009978 | Pde1a         | - |
| 175  | Cdkn2a <sup>-/-</sup> _HSPCs | SINLV.SF.GFP.PRE | BM          | 2 | 84051653  | - | NM_018782    | Calcr1        | - |
| BULK | Cdkn2a <sup>-/-</sup> _HSPCs | SINLV.SF.GFP.PRE | BULK        | 2 | 91604219  | + | NM_001080754 | D030051N19Rik | + |
| 215  | Cdkn2a <sup>-/-</sup> _HSPCs | SINLV.SF.GFP.PRE | BM          | 2 | 96131055  | - | NM_178725    | Lrrc4c        | + |
| 215  | Cdkn2a <sup>-/-</sup> _HSPCs | SINLV.SF.GFP.PRE | BM          | 2 | 96170372  | - | NM_178725    | Lrrc4c        | + |
| 217  | Cdkn2a <sup>-/-</sup> _HSPCs | SINLV.SF.GFP.PRE | BM          | 2 | 98502488  | + | NM_178725    | Lrrc4c        | + |
| 227  | Cdkn2a <sup>-/-</sup> _HSPCs | SINLV.SF.GFP.PRE | SPLEEN      | 2 | 98507309  | - | NM_178725    | Lrrc4c        | + |
| 198  | Cdkn2a <sup>-/-</sup> _HSPCs | SINLV.SF.GFP.PRE | BM          | 2 | 98507425  | - | NM_178725    | Lrrc4c        | + |
| 194  | Cdkn2a <sup>-/-</sup> _HSPCs | SINLV.SF.GFP.PRE | BM          | 2 | 101462924 | - | NM_026592    | B230118H07Rik | - |
| BULK | Cdkn2a <sup>-/-</sup> _HSPCs | SINLV.SF.GFP.PRE | BULK        | 2 | 102808146 | - | NM_175094    | Pdhx          | - |
| 237  | Cdkn2a <sup>-/-</sup> _HSPCs | SINLV.SF.GFP.PRE | BM          | 2 | 104310861 | + | NM_001145824 | Hipk3         | - |
| 198  | Cdkn2a <sup>-/-</sup> _HSPCs | SINLV.SF.GFP.PRE | BM - SPLEEN | 2 | 112127331 | - | NM_133648    | Slc12a6       | + |
| 219  | Cdkn2a <sup>-/-</sup> _HSPCs | SINLV.SF.GFP.PRE | SPLEEN      | 2 | 115769944 | + | NM_001136072 | Meis2         | - |
| 174  | Cdkn2a <sup>-/-</sup> _HSPCs | SINLV.SF.GFP.PRE | SPLEEN      | 2 | 116008367 | + | NM_001136072 | Meis2         | - |
| 227  | Cdkn2a <sup>-/-</sup> _HSPCs | SINLV.SF.GFP.PRE | SPLEEN      | 2 | 116960963 | + | NM_033524    | Spred1        | + |
| BULK | Cdkn2a <sup>-/-</sup> _HSPCs | SINLV.SF.GFP.PRE | BULK        | 2 | 122135593 | + | NM_172980    | Slc28a2       | + |
| 198  | Cdkn2a <sup>-/-</sup> _HSPCs | SINLV.SF.GFP.PRE | SPLEEN      | 2 | 124574939 | + | NM_172537    | Sema6d        | + |
| 175  | Cdkn2a <sup>-/-</sup> _HSPCs | SINLV.SF.GFP.PRE | BM          | 2 | 124633457 | - | NM_172537    | Sema6d        | + |
| 198  | Cdkn2a <sup>-/-</sup> _HSPCs | SINLV.SF.GFP.PRE | SPLEEN      | 2 | 125703502 | + | NM_175154    | Galk2         | + |
| 236  | Cdkn2a <sup>-/-</sup> _HSPCs | SINLV.SF.GFP.PRE | BM          | 2 | 126705531 | - | NM_021450    | Trpm7         | - |
| 227  | Cdkn2a <sup>-/-</sup> _HSPCs | SINLV.SF.GFP.PRE | SPLEEN      | 2 | 126737316 | + | NM_023220    | 2010106G01Rik | - |
| 175  | Cdkn2a <sup>-/-</sup> _HSPCs | SINLV.SF.GFP.PRE | BM          | 2 | 136787075 | - | NM_001038641 | 2210009G21Rik | + |

|      |                              |                  |             |   |           |   |              |               |   |
|------|------------------------------|------------------|-------------|---|-----------|---|--------------|---------------|---|
| 238  | Cdkn2a <sup>-/-</sup> _HSPCs | SINLV.SF.GFP.PRE | SPLEEN      | 2 | 137054764 | - | NM_013822    | Jag1          | - |
| 198  | Cdkn2a <sup>-/-</sup> _HSPCs | SINLV.SF.GFP.PRE | BM - SPLEEN | 2 | 139809744 | - | NM_175225    | Tasp1         | - |
| 175  | Cdkn2a <sup>-/-</sup> _HSPCs | SINLV.SF.GFP.PRE | BM          | 2 | 140239605 | + | NM_028387    | Macro2        | + |
| 210  | Cdkn2a <sup>-/-</sup> _HSPCs | SINLV.SF.GFP.PRE | SPLEEN      | 2 | 141262591 | - | NM_001013802 | Macro2        | + |
| 206  | Cdkn2a <sup>-/-</sup> _HSPCs | SINLV.SF.GFP.PRE | BM          | 2 | 141965497 | - | NM_001013802 | LOC433479     | + |
| 206  | Cdkn2a <sup>-/-</sup> _HSPCs | SINLV.SF.GFP.PRE | BM          | 2 | 142099588 | + | NM_001013802 | Macro2        | + |
| 206  | Cdkn2a <sup>-/-</sup> _HSPCs | SINLV.SF.GFP.PRE | BM          | 2 | 142099760 | + | NM_001013802 | Macro2        | + |
| 206  | Cdkn2a <sup>-/-</sup> _HSPCs | SINLV.SF.GFP.PRE | BM          | 2 | 142099792 | - | NM_001013802 | Macro2        | + |
| 186  | Cdkn2a <sup>-/-</sup> _HSPCs | SINLV.SF.GFP.PRE | BM          | 2 | 149965123 | + | NM_023266    | Zfp120        | - |
| 186  | Cdkn2a <sup>-/-</sup> _HSPCs | SINLV.SF.GFP.PRE | BM          | 2 | 149965210 | - | NM_023266    | Zfp120        | - |
| 237  | Cdkn2a <sup>-/-</sup> _HSPCs | SINLV.SF.GFP.PRE | BM          | 2 | 156822545 | + | NM_025853    | Dsn1          | - |
| 198  | Cdkn2a <sup>-/-</sup> _HSPCs | SINLV.SF.GFP.PRE | SPLEEN      | 2 | 156852760 | - | NM_025853    | Dsn1          | - |
| 222  | Cdkn2a <sup>-/-</sup> _HSPCs | SINLV.SF.GFP.PRE | SPLEEN      | 2 | 165450012 | - | NM_010165    | Eya2          | + |
| 222  | Cdkn2a <sup>-/-</sup> _HSPCs | SINLV.SF.GFP.PRE | BM - SPLEEN | 2 | 165584307 | - | NM_010165    | Eya2          | + |
| 215  | Cdkn2a <sup>-/-</sup> _HSPCs | SINLV.SF.GFP.PRE | BM          | 2 | 165890948 | + | NM_008679    | Ncoa3         | + |
| 222  | Cdkn2a <sup>-/-</sup> _HSPCs | SINLV.SF.GFP.PRE | BM - SPLEEN | 2 | 181278813 | - | NM_016775    | Dnajc5        | + |
| 198  | Cdkn2a <sup>-/-</sup> _HSPCs | SINLV.SF.GFP.PRE | BM - SPLEEN | 2 | 181282285 | + | NM_016775    | Dnajc5        | + |
| 175  | Cdkn2a <sup>-/-</sup> _HSPCs | SINLV.SF.GFP.PRE | BM          | 3 | 5326018   | - | NM_030708    | Zfx4          | + |
| 198  | Cdkn2a <sup>-/-</sup> _HSPCs | SINLV.SF.GFP.PRE | BM - SPLEEN | 3 | 14614439  | + | NM_001099674 | 1810022K09Rik | - |
| 174  | Cdkn2a <sup>-/-</sup> _HSPCs | SINLV.SF.GFP.PRE | SPLEEN      | 3 | 17963035  | - | NM_021560    | Bhlhe22       | + |
| 190  | Cdkn2a <sup>-/-</sup> _HSPCs | SINLV.SF.GFP.PRE | SPLEEN      | 3 | 19102235  | - | NM_026182    | Mtfr1         | + |
| 227  | Cdkn2a <sup>-/-</sup> _HSPCs | SINLV.SF.GFP.PRE | SPLEEN      | 3 | 19150484  | - | NM_008802    | Pde7a         | - |
| BULK | Cdkn2a <sup>-/-</sup> _HSPCs | SINLV.SF.GFP.PRE | BULK        | 3 | 19342469  | - | NM_028840    | Armc1         | - |
| 217  | Cdkn2a <sup>-/-</sup> _HSPCs | SINLV.SF.GFP.PRE | BM          | 3 | 19347761  | - | NM_025489    | Dnajc5b       | + |
| 187  | Cdkn2a <sup>-/-</sup> _HSPCs | SINLV.SF.GFP.PRE | BM          | 3 | 20174997  | + | NM_029706    | Cpb1          | - |
| 207  | Cdkn2a <sup>-/-</sup> _HSPCs | SINLV.SF.GFP.PRE | SPLEEN      | 3 | 21987834  | - | NM_030732    | Tbl1xr1       | + |
| 227  | Cdkn2a <sup>-/-</sup> _HSPCs | SINLV.SF.GFP.PRE | SPLEEN      | 3 | 27071916  | + | NM_178772    | Aadacl1       | + |
| 227  | Cdkn2a <sup>-/-</sup> _HSPCs | SINLV.SF.GFP.PRE | SPLEEN      | 3 | 27071981  | - | NM_178772    | Aadacl1       | + |
| 237  | Cdkn2a <sup>-/-</sup> _HSPCs | SINLV.SF.GFP.PRE | BM          | 3 | 28560411  | + | NM_031197    | Slc2a2        | + |
| 198  | Cdkn2a <sup>-/-</sup> _HSPCs | SINLV.SF.GFP.PRE | SPLEEN      | 3 | 29969961  | + | NM_007963    | Evi1          | + |
| 238  | Cdkn2a <sup>-/-</sup> _HSPCs | SINLV.SF.GFP.PRE | SPLEEN      | 3 | 33936558  | + | NM_001113188 | Fxr1          | + |

|      |                              |                  |        |   |           |   |              |               |   |
|------|------------------------------|------------------|--------|---|-----------|---|--------------|---------------|---|
| 237  | Cdkn2a <sup>-/-</sup> _HSPCs | SINLV.SF.GFP.PRE | BM     | 3 | 35658057  | + | NM_029570    | Atp11b        | + |
| 222  | Cdkn2a <sup>-/-</sup> _HSPCs | SINLV.SF.GFP.PRE | SPLEEN | 3 | 36773343  | - | NM_172679    | 4932438A13Rik | + |
| 198  | Cdkn2a <sup>-/-</sup> _HSPCs | SINLV.SF.GFP.PRE | SPLEEN | 3 | 36891446  | - | NM_172679    | 4932438A13Rik | + |
| 175  | Cdkn2a <sup>-/-</sup> _HSPCs | SINLV.SF.GFP.PRE | BM     | 3 | 37348743  | - | NM_021343    | Spata5        | + |
| 198  | Cdkn2a <sup>-/-</sup> _HSPCs | SINLV.SF.GFP.PRE | SPLEEN | 3 | 38851860  | - | NM_183221    | Fat4          | + |
| 227  | Cdkn2a <sup>-/-</sup> _HSPCs | SINLV.SF.GFP.PRE | SPLEEN | 3 | 39680544  | + | NM_175515    | Intu          | + |
| 219  | Cdkn2a <sup>-/-</sup> _HSPCs | SINLV.SF.GFP.PRE | SPLEEN | 3 | 41225186  | + | NM_001130184 | Phf17         | + |
| 227  | Cdkn2a <sup>-/-</sup> _HSPCs | SINLV.SF.GFP.PRE | SPLEEN | 3 | 41516728  | + | NM_001081411 | Sc11          | - |
| 238  | Cdkn2a <sup>-/-</sup> _HSPCs | SINLV.SF.GFP.PRE | SPLEEN | 3 | 42249784  | - | NM_001099785 | D3Ert751e     | + |
| 175  | Cdkn2a <sup>-/-</sup> _HSPCs | SINLV.SF.GFP.PRE | BM     | 3 | 46232964  | - | NM_001101479 | Pabpc4l       | - |
| 175  | Cdkn2a <sup>-/-</sup> _HSPCs | SINLV.SF.GFP.PRE | BM     | 3 | 57191449  | - | NM_145539    | Tm4sf4        | + |
| 175  | Cdkn2a <sup>-/-</sup> _HSPCs | SINLV.SF.GFP.PRE | BM     | 3 | 59262725  | - | NM_027571    | P2ry12        | - |
| 227  | Cdkn2a <sup>-/-</sup> _HSPCs | SINLV.SF.GFP.PRE | SPLEEN | 3 | 60007893  | + | NM_032400    | Sucnr1        | + |
| 175  | Cdkn2a <sup>-/-</sup> _HSPCs | SINLV.SF.GFP.PRE | BM     | 3 | 61106423  | - | NM_028712    | Rap2b         | + |
| 237  | Cdkn2a <sup>-/-</sup> _HSPCs | SINLV.SF.GFP.PRE | BM     | 3 | 62308911  | - | NM_028136    | Dhx36         | - |
| BULK | Cdkn2a <sup>-/-</sup> _HSPCs | SINLV.SF.GFP.PRE | BULK   | 3 | 62569276  | + | NM_028136    | Dhx36         | - |
| 175  | Cdkn2a <sup>-/-</sup> _HSPCs | SINLV.SF.GFP.PRE | BM     | 3 | 69383282  | + | NM_020026    | B3galnt1      | - |
| 207  | Cdkn2a <sup>-/-</sup> _HSPCs | SINLV.SF.GFP.PRE | SPLEEN | 3 | 72691266  | + | NM_001081137 | 2010204N08Rik | + |
| 227  | Cdkn2a <sup>-/-</sup> _HSPCs | SINLV.SF.GFP.PRE | SPLEEN | 3 | 75362425  | + | NM_009250    | Serpini1      | + |
| 227  | Cdkn2a <sup>-/-</sup> _HSPCs | SINLV.SF.GFP.PRE | SPLEEN | 3 | 75362473  | - | NM_009250    | Serpini1      | + |
| 227  | Cdkn2a <sup>-/-</sup> _HSPCs | SINLV.SF.GFP.PRE | SPLEEN | 3 | 75723227  | - | NM_175193    | Golim4        | - |
| 222  | Cdkn2a <sup>-/-</sup> _HSPCs | SINLV.SF.GFP.PRE | BM     | 3 | 86064184  | + | NM_001077687 | Lrba          | + |
| 198  | Cdkn2a <sup>-/-</sup> _HSPCs | SINLV.SF.GFP.PRE | SPLEEN | 3 | 88112646  | + | NM_009836    | Cct3          | + |
| 210  | Cdkn2a <sup>-/-</sup> _HSPCs | SINLV.SF.GFP.PRE | SPLEEN | 3 | 88847878  | + | NM_138679    | Ash11         | + |
| BULK | Cdkn2a <sup>-/-</sup> _HSPCs | SINLV.SF.GFP.PRE | BULK   | 3 | 89118202  | + | NM_138679    | Ash11         | + |
| 174  | Cdkn2a <sup>-/-</sup> _HSPCs | SINLV.SF.GFP.PRE | SPLEEN | 3 | 89799145  | + | NM_011826    | Hax1          | - |
| BULK | Cdkn2a <sup>-/-</sup> _HSPCs | SINLV.SF.GFP.PRE | BULK   | 3 | 90408624  | - | NM_139304    | Gatad2b       | + |
| 194  | Cdkn2a <sup>-/-</sup> _HSPCs | SINLV.SF.GFP.PRE | BM     | 3 | 100455265 | + | NM_010763    | Man1a2        | - |
| 237  | Cdkn2a <sup>-/-</sup> _HSPCs | SINLV.SF.GFP.PRE | BM     | 3 | 100480181 | - | NM_010763    | Man1a2        | - |
| 217  | Cdkn2a <sup>-/-</sup> _HSPCs | SINLV.SF.GFP.PRE | BM     | 3 | 101725602 | - | NM_172295    | BC037703      | - |
| 174  | Cdkn2a <sup>-/-</sup> _HSPCs | SINLV.SF.GFP.PRE | SPLEEN | 3 | 102835842 | - | NM_144901    | Csde1         | + |

|      |                              |                  |        |   |           |   |              |               |   |
|------|------------------------------|------------------|--------|---|-----------|---|--------------|---------------|---|
| 175  | Cdkn2a <sup>-/-</sup> _HSPCs | SINLV.SF.GFP.PRE | BM     | 3 | 107813689 | - | NM_010358    | Gstm1         | - |
| 206  | Cdkn2a <sup>-/-</sup> _HSPCs | SINLV.SF.GFP.PRE | BM     | 3 | 113886589 | - | NM_007729    | Col11a1       | + |
| 175  | Cdkn2a <sup>-/-</sup> _HSPCs | SINLV.SF.GFP.PRE | BM     | 3 | 114809602 | + | NM_153157    | Olfm3         | + |
| 190  | Cdkn2a <sup>-/-</sup> _HSPCs | SINLV.SF.GFP.PRE | SPLEEN | 3 | 115501686 | + | NM_007901    | S1pr1         | - |
| 222  | Cdkn2a <sup>-/-</sup> _HSPCs | SINLV.SF.GFP.PRE | BM     | 3 | 119457198 | + | NM_019550    | Ptbp2         | - |
| 215  | Cdkn2a <sup>-/-</sup> _HSPCs | SINLV.SF.GFP.PRE | BM     | 3 | 119472686 | + | NM_019550    | Ptbp2         | - |
| 198  | Cdkn2a <sup>-/-</sup> _HSPCs | SINLV.SF.GFP.PRE | SPLEEN | 3 | 122240525 | - | NM_001114665 | Fnbp11        | - |
| 238  | Cdkn2a <sup>-/-</sup> _HSPCs | SINLV.SF.GFP.PRE | SPLEEN | 3 | 122273418 | - | NM_001114665 | Fnbp11        | - |
| BULK | Cdkn2a <sup>-/-</sup> _HSPCs | SINLV.SF.GFP.PRE | BULK   | 3 | 123406215 | - | NM_201638    | G430022H21Rik | - |
| 222  | Cdkn2a <sup>-/-</sup> _HSPCs | SINLV.SF.GFP.PRE | SPLEEN | 3 | 124970407 | - | NM_022565    | Ndst4         | + |
| 206  | Cdkn2a <sup>-/-</sup> _HSPCs | SINLV.SF.GFP.PRE | BM     | 3 | 126522010 | + | NM_001025438 | Camk2d        | + |
| 175  | Cdkn2a <sup>-/-</sup> _HSPCs | SINLV.SF.GFP.PRE | BM     | 3 | 126524324 | - | NM_001025438 | Camk2d        | + |
| 175  | Cdkn2a <sup>-/-</sup> _HSPCs | SINLV.SF.GFP.PRE | BM     | 3 | 126636867 | + | NM_001034168 | Ank2          | - |
| 206  | Cdkn2a <sup>-/-</sup> _HSPCs | SINLV.SF.GFP.PRE | BM     | 3 | 126811114 | + | NM_001025438 | camk2d        | + |
| 222  | Cdkn2a <sup>-/-</sup> _HSPCs | SINLV.SF.GFP.PRE | SPLEEN | 3 | 134021639 | - | NM_001004367 | Cxxc4         | + |
| 222  | Cdkn2a <sup>-/-</sup> _HSPCs | SINLV.SF.GFP.PRE | SPLEEN | 3 | 135109721 | - | NM_025356    | Ube2d3        | + |
| BULK | Cdkn2a <sup>-/-</sup> _HSPCs | SINLV.SF.GFP.PRE | BULK   | 3 | 135242654 | + | NM_027208    | Bdh2          | + |
| 198  | Cdkn2a <sup>-/-</sup> _HSPCs | SINLV.SF.GFP.PRE | BM     | 3 | 135797969 | + | NM_001033350 | Bank1         | - |
| BULK | Cdkn2a <sup>-/-</sup> _HSPCs | SINLV.SF.GFP.PRE | BULK   | 3 | 136581586 | - | NM_008913    | Ppp3ca        | + |
| BULK | Cdkn2a <sup>-/-</sup> _HSPCs | SINLV.SF.GFP.PRE | BULK   | 3 | 137127113 | - | NM_016885    | Emcn          | + |
| 227  | Cdkn2a <sup>-/-</sup> _HSPCs | SINLV.SF.GFP.PRE | SPLEEN | 3 | 139209077 | + | NM_198659    | B930007M17Rik | + |
| 198  | Cdkn2a <sup>-/-</sup> _HSPCs | SINLV.SF.GFP.PRE | SPLEEN | 3 | 140333526 | - | NM_008811    | Pdha2         | - |
| 190  | Cdkn2a <sup>-/-</sup> _HSPCs | SINLV.SF.GFP.PRE | SPLEEN | 3 | 142279252 | - | NM_010259    | Gbp1          | + |
| 222  | Cdkn2a <sup>-/-</sup> _HSPCs | SINLV.SF.GFP.PRE | SPLEEN | 3 | 144364695 | - | NM_019464    | Sh3glb1       | - |
| 210  | Cdkn2a <sup>-/-</sup> _HSPCs | SINLV.SF.GFP.PRE | SPLEEN | 3 | 144371679 | - | NM_019464    | Sh3glb1       | - |
| 237  | Cdkn2a <sup>-/-</sup> _HSPCs | SINLV.SF.GFP.PRE | BM     | 3 | 146439105 | + | NM_011100    | Prkacb        | - |
| 175  | Cdkn2a <sup>-/-</sup> _HSPCs | SINLV.SF.GFP.PRE | BM     | 3 | 146465118 | + | NM_011100    | Prkacb        | - |
| 174  | Cdkn2a <sup>-/-</sup> _HSPCs | SINLV.SF.GFP.PRE | SPLEEN | 3 | 147200134 | - | NM_027594    | Tul7          | + |
| BULK | Cdkn2a <sup>-/-</sup> _HSPCs | SINLV.SF.GFP.PRE | BULK   | 3 | 149399909 | + | NM_001033772 | LOC381483     | + |
| 227  | Cdkn2a <sup>-/-</sup> _HSPCs | SINLV.SF.GFP.PRE | SPLEEN | 3 | 151397496 | - | NM_133871    | Ifi44         | - |
| 175  | Cdkn2a <sup>-/-</sup> _HSPCs | SINLV.SF.GFP.PRE | BM     | 3 | 159187559 | + | NM_029523    | Depdc1a       | + |

|      |                              |                  |             |   |          |   |              |                    |   |
|------|------------------------------|------------------|-------------|---|----------|---|--------------|--------------------|---|
| 174  | Cdkn2a <sup>-/-</sup> _HSPCs | SINLV.SF.GFP.PRE | SPLEEN      | 4 | 1255607  | - | NM_001033326 | Dhsrx              | + |
| 207  | Cdkn2a <sup>-/-</sup> _HSPCs | SINLV.SF.GFP.PRE | BM          | 4 | 1257668  | + | NM_001033326 | Dhsrx              | + |
| 302  | Cdkn2a <sup>-/-</sup> _HSPCs | SINLV.SF.GFP.PRE | BM          | 4 | 1257668  | + | NM_001033326 | Dhsrx              | + |
| 198  | Cdkn2a <sup>-/-</sup> _HSPCs | SINLV.SF.GFP.PRE | SPLEEN      | 4 | 3643487  | + | NM_001111096 | Lyn                | + |
| 206  | Cdkn2a <sup>-/-</sup> _HSPCs | SINLV.SF.GFP.PRE | BM          | 4 | 3870182  | - | NM_181391    | Chchd7             | + |
| 198  | Cdkn2a <sup>-/-</sup> _HSPCs | SINLV.SF.GFP.PRE | SPLEEN      | 4 | 11084980 | - | NM_021897    | Trp53inp1          | + |
| 222  | Cdkn2a <sup>-/-</sup> _HSPCs | SINLV.SF.GFP.PRE | SPLEEN      | 4 | 12095395 | - | NM_026558    | Fam92a             | - |
| 237  | Cdkn2a <sup>-/-</sup> _HSPCs | SINLV.SF.GFP.PRE | BM          | 4 | 12670176 | - | NM_173746    | Gm11818            | + |
| 227  | Cdkn2a <sup>-/-</sup> _HSPCs | SINLV.SF.GFP.PRE | SPLEEN      | 4 | 12739866 | - | NM_173746    | Gm11818            | + |
| BULK | Cdkn2a <sup>-/-</sup> _HSPCs | SINLV.SF.GFP.PRE | BULK        | 4 | 12909141 | + | NM_173746    | ENSMUSG00000055963 | + |
| 222  | Cdkn2a <sup>-/-</sup> _HSPCs | SINLV.SF.GFP.PRE | SPLEEN      | 4 | 13020490 | + | NM_173746    | Gm11818            | + |
| 198  | Cdkn2a <sup>-/-</sup> _HSPCs | SINLV.SF.GFP.PRE | SPLEEN      | 4 | 14208234 | + | NM_145947    | Slc26a7            | - |
| 210  | Cdkn2a <sup>-/-</sup> _HSPCs | SINLV.SF.GFP.PRE | SPLEEN      | 4 | 16393073 | + | NM_138952    | Ripk2              | - |
| 222  | Cdkn2a <sup>-/-</sup> _HSPCs | SINLV.SF.GFP.PRE | SPLEEN      | 4 | 17420248 | + | NM_019724    | Mmp16              | + |
| 190  | Cdkn2a <sup>-/-</sup> _HSPCs | SINLV.SF.GFP.PRE | SPLEEN      | 4 | 19633195 | - | NM_177327    | Wwp1               | - |
| 198  | Cdkn2a <sup>-/-</sup> _HSPCs | SINLV.SF.GFP.PRE | BM          | 4 | 22291739 | - | NM_172988    | Fbxl4              | + |
| 198  | Cdkn2a <sup>-/-</sup> _HSPCs | SINLV.SF.GFP.PRE | SPLEEN      | 4 | 33473567 | + | NM_011884    | Rngtt              | + |
| 198  | Cdkn2a <sup>-/-</sup> _HSPCs | SINLV.SF.GFP.PRE | BM          | 4 | 34511792 | + | NM_001007589 | Akirin2            | + |
| 222  | Cdkn2a <sup>-/-</sup> _HSPCs | SINLV.SF.GFP.PRE | BM - SPLEEN | 4 | 44817092 | - | NM_138590    | Zcchc7             | + |
| 222  | Cdkn2a <sup>-/-</sup> _HSPCs | SINLV.SF.GFP.PRE | BM          | 4 | 44825320 | - | NM_177027    | Zcchc7             | + |
| 198  | Cdkn2a <sup>-/-</sup> _HSPCs | SINLV.SF.GFP.PRE | BM - SPLEEN | 4 | 44924020 | - | NM_177027    | Zcchc7             | + |
| 210  | Cdkn2a <sup>-/-</sup> _HSPCs | SINLV.SF.GFP.PRE | SPLEEN      | 4 | 45363123 | + | NM_153167    | Wdr32              | - |
| BULK | Cdkn2a <sup>-/-</sup> _HSPCs | SINLV.SF.GFP.PRE | BULK        | 4 | 49266539 | + | NM_178756    | E130309F12Rik      | + |
| 198  | Cdkn2a <sup>-/-</sup> _HSPCs | SINLV.SF.GFP.PRE | SPLEEN      | 4 | 50014999 | - | NM_001033351 | Grin3a             | - |
| 238  | Cdkn2a <sup>-/-</sup> _HSPCs | SINLV.SF.GFP.PRE | SPLEEN      | 4 | 54453521 | + | NM_172867    | Zfp462             | + |
| 175  | Cdkn2a <sup>-/-</sup> _HSPCs | SINLV.SF.GFP.PRE | BM          | 4 | 57047592 | + | NM_019427    | Epb4.114b          | - |
| 222  | Cdkn2a <sup>-/-</sup> _HSPCs | SINLV.SF.GFP.PRE | BM          | 4 | 58046267 | + | NM_022814    | Svep1              | - |
| 175  | Cdkn2a <sup>-/-</sup> _HSPCs | SINLV.SF.GFP.PRE | BM          | 4 | 59555502 | - | NM_144904    | Rod1               | - |
| 175  | Cdkn2a <sup>-/-</sup> _HSPCs | SINLV.SF.GFP.PRE | BM          | 4 | 65207665 | - | NM_019514    | Astn2              | - |
| 198  | Cdkn2a <sup>-/-</sup> _HSPCs | SINLV.SF.GFP.PRE | BM - SPLEEN | 4 | 66534122 | + | NM_021297    | Tlr4               | + |
| 175  | Cdkn2a <sup>-/-</sup> _HSPCs | SINLV.SF.GFP.PRE | BM          | 4 | 66609807 | + | NM_021297    | Tlr4               | + |

|      |                              |                  |             |   |           |   |              |                    |   |
|------|------------------------------|------------------|-------------|---|-----------|---|--------------|--------------------|---|
| 219  | Cdkn2a <sup>-/-</sup> _HSPCs | SINLV.SF.GFP.PRE | SPLEEN      | 4 | 67055547  | - | NM_021297    | Tlr4               | + |
| 198  | Cdkn2a <sup>-/-</sup> _HSPCs | SINLV.SF.GFP.PRE | SPLEEN      | 4 | 70436306  | - | NM_172694    | Megf9              | - |
| 175  | Cdkn2a <sup>-/-</sup> _HSPCs | SINLV.SF.GFP.PRE | BM          | 4 | 71311536  | - | NM_011599    | Tle1               | - |
| 219  | Cdkn2a <sup>-/-</sup> _HSPCs | SINLV.SF.GFP.PRE | SPLEEN      | 4 | 71913565  | - | NM_011599    | Tle1               | - |
| 206  | Cdkn2a <sup>-/-</sup> _HSPCs | SINLV.SF.GFP.PRE | BM          | 4 | 77697427  | + | NM_011211    | Ptprd              | - |
| 206  | Cdkn2a <sup>-/-</sup> _HSPCs | SINLV.SF.GFP.PRE | BM          | 4 | 77872100  | + | NM_011211    | Ptprd              | - |
| 237  | Cdkn2a <sup>-/-</sup> _HSPCs | SINLV.SF.GFP.PRE | BM          | 4 | 87213760  | + | NM_027326    | Milt3              | - |
| 210  | Cdkn2a <sup>-/-</sup> _HSPCs | SINLV.SF.GFP.PRE | SPLEEN      | 4 | 87471194  | - | NM_027326    | Milt3              | - |
| 238  | Cdkn2a <sup>-/-</sup> _HSPCs | SINLV.SF.GFP.PRE | SPLEEN      | 4 | 94166692  | + | NM_026368    | 5830433M19Rik      | - |
| BULK | Cdkn2a <sup>-/-</sup> _HSPCs | SINLV.SF.GFP.PRE | BULK        | 4 | 96026436  | + | NM_010008    | Cyp2j6             | - |
| 222  | Cdkn2a <sup>-/-</sup> _HSPCs | SINLV.SF.GFP.PRE | BM          | 4 | 98142228  | + | NM_001005784 | Inadl              | + |
| 198  | Cdkn2a <sup>-/-</sup> _HSPCs | SINLV.SF.GFP.PRE | SPLEEN      | 4 | 99584200  | - | NM_145549    | Efcab7             | + |
| 219  | Cdkn2a <sup>-/-</sup> _HSPCs | SINLV.SF.GFP.PRE | SPLEEN      | 4 | 99592233  | - | NM_145549    | Efcab7             | + |
| 237  | Cdkn2a <sup>-/-</sup> _HSPCs | SINLV.SF.GFP.PRE | BM          | 4 | 102890135 | + | NM_177732    | Slc35d1            | - |
| 237  | Cdkn2a <sup>-/-</sup> _HSPCs | SINLV.SF.GFP.PRE | BM          | 4 | 102890194 | - | NM_177732    | Slc35d1            | - |
| 237  | Cdkn2a <sup>-/-</sup> _HSPCs | SINLV.SF.GFP.PRE | BM          | 4 | 102891058 | - | NM_177732    | Slc35d1            | - |
| 190  | Cdkn2a <sup>-/-</sup> _HSPCs | SINLV.SF.GFP.PRE | SPLEEN      | 4 | 105980251 | - | NM_153565    | Pesk9              | - |
| 198  | Cdkn2a <sup>-/-</sup> _HSPCs | SINLV.SF.GFP.PRE | BM - SPLEEN | 4 | 110012652 | - | NM_001038698 | Elavl4             | - |
| BULK | Cdkn2a <sup>-/-</sup> _HSPCs | SINLV.SF.GFP.PRE | BULK        | 4 | 114173223 | + | NM_001085549 | OTTMUSG00000008561 | + |
| 198  | Cdkn2a <sup>-/-</sup> _HSPCs | SINLV.SF.GFP.PRE | SPLEEN      | 4 | 114343886 | - | NM_001085549 | Gm12824            | + |
| 298  | Cdkn2a <sup>-/-</sup> _HSPCs | SINLV.SF.GFP.PRE | BM          | 4 | 119964347 | - | NM_013883    | Scmh1              | + |
| 186  | Cdkn2a <sup>-/-</sup> _HSPCs | SINLV.SF.GFP.PRE | BM          | 4 | 126256183 | + | NM_175554    | Clspn              | + |
| 219  | Cdkn2a <sup>-/-</sup> _HSPCs | SINLV.SF.GFP.PRE | SPLEEN      | 4 | 131547129 | - | NM_001128606 | Epb4.1             | - |
| 194  | Cdkn2a <sup>-/-</sup> _HSPCs | SINLV.SF.GFP.PRE | BM          | 4 | 134391506 | + | NM_025382    | Tmem57             | - |
| 222  | Cdkn2a <sup>-/-</sup> _HSPCs | SINLV.SF.GFP.PRE | SPLEEN      | 4 | 135913126 | + | NM_028871    | Hnrnpr             | + |
| 198  | Cdkn2a <sup>-/-</sup> _HSPCs | SINLV.SF.GFP.PRE | SPLEEN      | 4 | 138831118 | + | NM_001037761 | Capzb              | + |
| 198  | Cdkn2a <sup>-/-</sup> _HSPCs | SINLV.SF.GFP.PRE | SPLEEN      | 4 | 141205402 | - | NM_001033150 | Plekhn2            | - |
| 219  | Cdkn2a <sup>-/-</sup> _HSPCs | SINLV.SF.GFP.PRE | SPLEEN      | 4 | 142721706 | + | NM_001081355 | Prdm2              | - |
| 198  | Cdkn2a <sup>-/-</sup> _HSPCs | SINLV.SF.GFP.PRE | BM          | 4 | 144778101 | - | NM_001128198 | Vps13d             | - |
| 219  | Cdkn2a <sup>-/-</sup> _HSPCs | SINLV.SF.GFP.PRE | SPLEEN      | 4 | 146928636 | - | NM_001014397 | Gm13154            | + |
| 198  | Cdkn2a <sup>-/-</sup> _HSPCs | SINLV.SF.GFP.PRE | SPLEEN      | 4 | 151211017 | + | NM_001081557 | Camta1             | - |

|      |                              |                  |             |   |           |   |              |               |   |
|------|------------------------------|------------------|-------------|---|-----------|---|--------------|---------------|---|
| 217  | Cdkn2a <sup>-/-</sup> _HSPCs | SINLV.SF.GFP.PRE | BM          | 4 | 153943267 | - | NM_027504    | Prdm16        | - |
| 198  | Cdkn2a <sup>-/-</sup> _HSPCs | SINLV.SF.GFP.PRE | SPLEEN      | 4 | 154001449 | - | NM_027504    | Prdm16        | - |
| 207  | Cdkn2a <sup>-/-</sup> _HSPCs | SINLV.SF.GFP.PRE | SPLEEN      | 4 | 154373542 | - | NM_008142    | Gnb1          | + |
| 207  | Cdkn2a <sup>-/-</sup> _HSPCs | SINLV.SF.GFP.PRE | SPLEEN      | 4 | 154903850 | - | NM_001160016 | Gnb1          | + |
| 222  | Cdkn2a <sup>-/-</sup> _HSPCs | SINLV.SF.GFP.PRE | SPLEEN      | 4 | 155188314 | + | NM_207678    | Ccnl2         | + |
| 237  | Cdkn2a <sup>-/-</sup> _HSPCs | SINLV.SF.GFP.PRE | BM          | 5 | 3313712   | - | NM_009873    | Cdk6          | + |
| 198  | Cdkn2a <sup>-/-</sup> _HSPCs | SINLV.SF.GFP.PRE | SPLEEN      | 5 | 3396157   | - | NM_009873    | Cdk6          | + |
| 194  | Cdkn2a <sup>-/-</sup> _HSPCs | SINLV.SF.GFP.PRE | BM          | 5 | 3730249   | - | NM_001003909 | Ankib1        | - |
| 194  | Cdkn2a <sup>-/-</sup> _HSPCs | SINLV.SF.GFP.PRE | BM          | 5 | 3736255   | - | NM_001003909 | Ankib1        | - |
| 190  | Cdkn2a <sup>-/-</sup> _HSPCs | SINLV.SF.GFP.PRE | SPLEEN      | 5 | 4195718   | - | NM_001042670 | Gm9897        | + |
| 237  | Cdkn2a <sup>-/-</sup> _HSPCs | SINLV.SF.GFP.PRE | BM          | 5 | 4856303   | + | NM_011074    | Pftk1         | - |
| BULK | Cdkn2a <sup>-/-</sup> _HSPCs | SINLV.SF.GFP.PRE | BULK        | 5 | 5182228   | + | NM_011074    | Pftk1         | - |
| 227  | Cdkn2a <sup>-/-</sup> _HSPCs | SINLV.SF.GFP.PRE | SPLEEN      | 5 | 5547112   | + | NM_153116    | Gtpbp10       | - |
| 219  | Cdkn2a <sup>-/-</sup> _HSPCs | SINLV.SF.GFP.PRE | SPLEEN      | 5 | 8936813   | + | NM_008830    | Abcb4         | + |
| 210  | Cdkn2a <sup>-/-</sup> _HSPCs | SINLV.SF.GFP.PRE | SPLEEN      | 5 | 10774166  | - | NR_003596    | Gm6455        | + |
| 198  | Cdkn2a <sup>-/-</sup> _HSPCs | SINLV.SF.GFP.PRE | SPLEEN      | 5 | 12187904  | - | NM_028882    | Sema3d        | + |
| 237  | Cdkn2a <sup>-/-</sup> _HSPCs | SINLV.SF.GFP.PRE | BM          | 5 | 13504271  | - | NM_009152    | Sema3a        | + |
| 227  | Cdkn2a <sup>-/-</sup> _HSPCs | SINLV.SF.GFP.PRE | SPLEEN      | 5 | 14740947  | - | NM_001110796 | Pclo          | + |
| 206  | Cdkn2a <sup>-/-</sup> _HSPCs | SINLV.SF.GFP.PRE | BM          | 5 | 16063115  | + | NM_010427    | Hgf           | + |
| 198  | Cdkn2a <sup>-/-</sup> _HSPCs | SINLV.SF.GFP.PRE | SPLEEN      | 5 | 16119712  | + | NM_010427    | Hgf           | + |
| 198  | Cdkn2a <sup>-/-</sup> _HSPCs | SINLV.SF.GFP.PRE | BM - SPLEEN | 5 | 17065464  | + | NM_013657    | Sema3c        | + |
| 222  | Cdkn2a <sup>-/-</sup> _HSPCs | SINLV.SF.GFP.PRE | BM          | 5 | 17071954  | + | NM_013657    | Sema3c        | + |
| 215  | Cdkn2a <sup>-/-</sup> _HSPCs | SINLV.SF.GFP.PRE | BM          | 5 | 20358872  | - | NM_172992    | Phf2          | - |
| 215  | Cdkn2a <sup>-/-</sup> _HSPCs | SINLV.SF.GFP.PRE | BM          | 5 | 20364878  | - | NM_172992    | Phf2          | - |
| 222  | Cdkn2a <sup>-/-</sup> _HSPCs | SINLV.SF.GFP.PRE | BM - SPLEEN | 5 | 20716145  | + | NM_175437    | Pion          | + |
| 198  | Cdkn2a <sup>-/-</sup> _HSPCs | SINLV.SF.GFP.PRE | SPLEEN      | 5 | 23102311  | + | NM_009274    | Srpk2         | - |
| 198  | Cdkn2a <sup>-/-</sup> _HSPCs | SINLV.SF.GFP.PRE | SPLEEN      | 5 | 24337525  | + | NM_053075    | Rheb          | - |
| 219  | Cdkn2a <sup>-/-</sup> _HSPCs | SINLV.SF.GFP.PRE | SPLEEN      | 5 | 24832908  | - | NM_001081383 | Mll3          | - |
| 207  | Cdkn2a <sup>-/-</sup> _HSPCs | SINLV.SF.GFP.PRE | BM          | 5 | 33143972  | + | NM_194340    | C330019G07Rik | - |
| 175  | Cdkn2a <sup>-/-</sup> _HSPCs | SINLV.SF.GFP.PRE | BM          | 5 | 40229672  | - | NM_010474    | Hs3st1        | - |
| 222  | Cdkn2a <sup>-/-</sup> _HSPCs | SINLV.SF.GFP.PRE | SPLEEN      | 5 | 42075681  | - | NM_027295    | Rab28         | - |



|      |                              |                  |             |   |          |   |              |           |   |
|------|------------------------------|------------------|-------------|---|----------|---|--------------|-----------|---|
| BULK | Cdkn2a <sup>-/-</sup> _HSPCs | SINLV.SF.GFP.PRE | BULK        | 5 | 42101003 | - | NM_001081422 | LOC665775 | - |
| BULK | Cdkn2a <sup>-/-</sup> _HSPCs | SINLV.SF.GFP.PRE | BULK        | 5 | 46899628 | - | NM_178142    | Lcor1     | - |
| 217  | Cdkn2a <sup>-/-</sup> _HSPCs | SINLV.SF.GFP.PRE | BM          | 5 | 47861754 | + | NM_178804    | Slit2     | + |
| 217  | Cdkn2a <sup>-/-</sup> _HSPCs | SINLV.SF.GFP.PRE | BM          | 5 | 47862022 | - | NM_178804    | Slit2     | + |
| 217  | Cdkn2a <sup>-/-</sup> _HSPCs | SINLV.SF.GFP.PRE | BM          | 5 | 48116946 | + | NM_178804    | Slit2     | + |
| 198  | Cdkn2a <sup>-/-</sup> _HSPCs | SINLV.SF.GFP.PRE | BM          | 5 | 48309581 | + | NM_178804    | Slit2     | + |
| BULK | Cdkn2a <sup>-/-</sup> _HSPCs | SINLV.SF.GFP.PRE | BULK        | 5 | 48471934 | + | NM_178804    | Slit2     | + |
| 175  | Cdkn2a <sup>-/-</sup> _HSPCs | SINLV.SF.GFP.PRE | BM          | 5 | 48786321 | + | NM_030265    | Kcnip4    | - |
| BULK | Cdkn2a <sup>-/-</sup> _HSPCs | SINLV.SF.GFP.PRE | BULK        | 5 | 52452817 | - | NM_007839    | Dhx15     | - |
| 207  | Cdkn2a <sup>-/-</sup> _HSPCs | SINLV.SF.GFP.PRE | THYMUS      | 5 | 52456831 | - | NM_007839    | Dhx15     | - |
| 198  | Cdkn2a <sup>-/-</sup> _HSPCs | SINLV.SF.GFP.PRE | BM - SPLEEN | 5 | 52545406 | + | NM_001042620 | Dhx15     | - |
| 190  | Cdkn2a <sup>-/-</sup> _HSPCs | SINLV.SF.GFP.PRE | SPLEEN      | 5 | 53144550 | - | NM_025951    | Pi4k2b    | + |
| 175  | Cdkn2a <sup>-/-</sup> _HSPCs | SINLV.SF.GFP.PRE | BM          | 5 | 54246446 | - | NM_144517    | Tbc1d19   | + |
| 210  | Cdkn2a <sup>-/-</sup> _HSPCs | SINLV.SF.GFP.PRE | SPLEEN      | 5 | 54455727 | + | NM_001081103 | Stim2     | + |
| 236  | Cdkn2a <sup>-/-</sup> _HSPCs | SINLV.SF.GFP.PRE | BM          | 5 | 54460202 | - | NM_001081103 | Stim2     | + |
| 236  | Cdkn2a <sup>-/-</sup> _HSPCs | SINLV.SF.GFP.PRE | BM          | 5 | 54563190 | - | NM_001081103 | Stim2     | + |
| 236  | Cdkn2a <sup>-/-</sup> _HSPCs | SINLV.SF.GFP.PRE | BM          | 5 | 54563197 | - | NM_001081103 | Stim2     | + |
| 237  | Cdkn2a <sup>-/-</sup> _HSPCs | SINLV.SF.GFP.PRE | BM          | 5 | 60982514 | - | NM_019468    | G6pd2     | + |
| 222  | Cdkn2a <sup>-/-</sup> _HSPCs | SINLV.SF.GFP.PRE | BM          | 5 | 63068393 | + | NM_178407    | Arap2     | - |
| 210  | Cdkn2a <sup>-/-</sup> _HSPCs | SINLV.SF.GFP.PRE | SPLEEN      | 5 | 63088268 | + | NM_178407    | Arap2     | - |
| 237  | Cdkn2a <sup>-/-</sup> _HSPCs | SINLV.SF.GFP.PRE | BM          | 5 | 65972089 | - | NM_016786    | Ube2k     | + |
| 190  | Cdkn2a <sup>-/-</sup> _HSPCs | SINLV.SF.GFP.PRE | SPLEEN      | 5 | 66495853 | - | NM_178446    | Rbm47     | - |
| 227  | Cdkn2a <sup>-/-</sup> _HSPCs | SINLV.SF.GFP.PRE | SPLEEN      | 5 | 67301714 | + | NM_001001980 | Limch1    | + |
| 174  | Cdkn2a <sup>-/-</sup> _HSPCs | SINLV.SF.GFP.PRE | SPLEEN      | 5 | 69140489 | + | NM_175519    | Kctd8     | - |
| 227  | Cdkn2a <sup>-/-</sup> _HSPCs | SINLV.SF.GFP.PRE | SPLEEN      | 5 | 69961925 | - | NM_172711    | Guf1      | + |
| 227  | Cdkn2a <sup>-/-</sup> _HSPCs | SINLV.SF.GFP.PRE | SPLEEN      | 5 | 72621814 | + | NM_153389    | Atp10d    | + |
| 227  | Cdkn2a <sup>-/-</sup> _HSPCs | SINLV.SF.GFP.PRE | SPLEEN      | 5 | 72633716 | + | NM_153389    | Atp10d    | + |
| 227  | Cdkn2a <sup>-/-</sup> _HSPCs | SINLV.SF.GFP.PRE | SPLEEN      | 5 | 72634336 | - | NM_153389    | Atp10d    | + |
| 198  | Cdkn2a <sup>-/-</sup> _HSPCs | SINLV.SF.GFP.PRE | SPLEEN      | 5 | 76085326 | + | NM_001122733 | Kit       | + |
| 219  | Cdkn2a <sup>-/-</sup> _HSPCs | SINLV.SF.GFP.PRE | SPLEEN      | 5 | 86204080 | + | NM_007683    | Cenpc1    | - |
| 194  | Cdkn2a <sup>-/-</sup> _HSPCs | SINLV.SF.GFP.PRE | BM          | 5 | 86472592 | + | NM_007683    | Cenpc1    | - |

|      |                              |                  |             |   |           |   |              |               |   |
|------|------------------------------|------------------|-------------|---|-----------|---|--------------|---------------|---|
| 222  | Cdkn2a <sup>-/-</sup> _HSPCs | SINLV.SF.GFP.PRE | BM          | 5 | 86592666  | + | NM_172712    | Uba6          | - |
| BULK | Cdkn2a <sup>-/-</sup> _HSPCs | SINLV.SF.GFP.PRE | BULK        | 5 | 96506590  | - | NM_053158    | Mrpl1         | + |
| 222  | Cdkn2a <sup>-/-</sup> _HSPCs | SINLV.SF.GFP.PRE | SPLEEN      | 5 | 96555288  | - | NM_178854    | Cnot6l        | - |
| 190  | Cdkn2a <sup>-/-</sup> _HSPCs | SINLV.SF.GFP.PRE | SPLEEN      | 5 | 97402382  | - | NM_080708    | Bmp2k         | + |
| 237  | Cdkn2a <sup>-/-</sup> _HSPCs | SINLV.SF.GFP.PRE | BM          | 5 | 98399004  | - | NM_133738    | Antxr2        | - |
| 198  | Cdkn2a <sup>-/-</sup> _HSPCs | SINLV.SF.GFP.PRE | SPLEEN      | 5 | 102299820 | + | NM_172882    | Wdfy3         | - |
| 222  | Cdkn2a <sup>-/-</sup> _HSPCs | SINLV.SF.GFP.PRE | SPLEEN      | 5 | 105403721 | - | NM_030239    | Abcg3         | - |
| BULK | Cdkn2a <sup>-/-</sup> _HSPCs | SINLV.SF.GFP.PRE | BULK        | 5 | 105711854 | + | NM_001033550 | Lrrc8b        | + |
| 227  | Cdkn2a <sup>-/-</sup> _HSPCs | SINLV.SF.GFP.PRE | SPLEEN      | 5 | 107407989 | + | NM_009863    | Cdc7          | + |
| 198  | Cdkn2a <sup>-/-</sup> _HSPCs | SINLV.SF.GFP.PRE | BM - SPLEEN | 5 | 107891536 | + | NM_027599    | Ayt1b         | + |
| 236  | Cdkn2a <sup>-/-</sup> _HSPCs | SINLV.SF.GFP.PRE | BM          | 5 | 112756616 | + | NM_018783    | Tfip11        | + |
| BULK | Cdkn2a <sup>-/-</sup> _HSPCs | SINLV.SF.GFP.PRE | BULK        | 5 | 116150115 | + | NM_007708    | Cit           | + |
| BULK | Cdkn2a <sup>-/-</sup> _HSPCs | SINLV.SF.GFP.PRE | BULK        | 5 | 123149633 | - | NM_001005866 | Fbx110        | - |
| 194  | Cdkn2a <sup>-/-</sup> _HSPCs | SINLV.SF.GFP.PRE | BM          | 5 | 123262750 | + | NM_001042491 | Anapc5        | - |
| BULK | Cdkn2a <sup>-/-</sup> _HSPCs | SINLV.SF.GFP.PRE | BULK        | 5 | 123303113 | + | NM_029112    | Morn3         | - |
| 222  | Cdkn2a <sup>-/-</sup> _HSPCs | SINLV.SF.GFP.PRE | BM - SPLEEN | 5 | 132430816 | - | NM_177047    | Auts2         | - |
| 198  | Cdkn2a <sup>-/-</sup> _HSPCs | SINLV.SF.GFP.PRE | SPLEEN      | 5 | 136923757 | - | NM_198602    | Cux1          | - |
| BULK | Cdkn2a <sup>-/-</sup> _HSPCs | SINLV.SF.GFP.PRE | BULK        | 5 | 139491841 | + | NM_024451    | Unc84a        | + |
| 210  | Cdkn2a <sup>-/-</sup> _HSPCs | SINLV.SF.GFP.PRE | SPLEEN      | 5 | 143685316 | - | NM_007393    | Actb          | - |
| 219  | Cdkn2a <sup>-/-</sup> _HSPCs | SINLV.SF.GFP.PRE | SPLEEN      | 5 | 150702705 | + | NM_080468    | Rxfp2         | + |
| 222  | Cdkn2a <sup>-/-</sup> _HSPCs | SINLV.SF.GFP.PRE | BM - SPLEEN | 5 | 151543772 | + | NM_175310    | Pds5b         | + |
| 222  | Cdkn2a <sup>-/-</sup> _HSPCs | SINLV.SF.GFP.PRE | SPLEEN      | 5 | 151550124 | - | NM_175310    | Pds5b         | + |
| 198  | Cdkn2a <sup>-/-</sup> _HSPCs | SINLV.SF.GFP.PRE | SPLEEN      | 6 | 4616808   | - | NM_001130188 | Sgce          | - |
| 190  | Cdkn2a <sup>-/-</sup> _HSPCs | SINLV.SF.GFP.PRE | SPLEEN      | 6 | 11760715  | - | NM_010886    | Ndufa4        | - |
| BULK | Cdkn2a <sup>-/-</sup> _HSPCs | SINLV.SF.GFP.PRE | BULK        | 6 | 11878770  | - | NM_029404    | Phf14         | + |
| 206  | Cdkn2a <sup>-/-</sup> _HSPCs | SINLV.SF.GFP.PRE | BM          | 6 | 11884388  | + | NM_029404    | Phf14         | + |
| 206  | Cdkn2a <sup>-/-</sup> _HSPCs | SINLV.SF.GFP.PRE | BM          | 6 | 11884527  | - | NM_029404    | Phf14         | + |
| 206  | Cdkn2a <sup>-/-</sup> _HSPCs | SINLV.SF.GFP.PRE | BM          | 6 | 13818883  | - | NR_024619    | 2610001J05Rik | - |
| 222  | Cdkn2a <sup>-/-</sup> _HSPCs | SINLV.SF.GFP.PRE | SPLEEN      | 6 | 16794750  | + | NM_031198    | Tcfec         | + |
| 219  | Cdkn2a <sup>-/-</sup> _HSPCs | SINLV.SF.GFP.PRE | SPLEEN      | 6 | 16818654  | + | NM_031198    | Tcfec         | + |
| 175  | Cdkn2a <sup>-/-</sup> _HSPCs | SINLV.SF.GFP.PRE | BM          | 6 | 17020555  | - | NM_207176    | Tes           | + |

|      |                              |                  |        |   |          |   |              |               |   |
|------|------------------------------|------------------|--------|---|----------|---|--------------|---------------|---|
| 190  | Cdkn2a <sup>-/-</sup> _HSPCs | SINLV.SF.GFP.PRE | SPLEEN | 6 | 22273432 | - | NM_138587    | Fam3c         | - |
| 222  | Cdkn2a <sup>-/-</sup> _HSPCs | SINLV.SF.GFP.PRE | SPLEEN | 6 | 24598055 | - | NM_028459    | Wasl          | - |
| 175  | Cdkn2a <sup>-/-</sup> _HSPCs | SINLV.SF.GFP.PRE | BM     | 6 | 24606715 | + | NM_028459    | Wasl          | - |
| 194  | Cdkn2a <sup>-/-</sup> _HSPCs | SINLV.SF.GFP.PRE | BM     | 6 | 27344616 | - | NM_008174    | Grm8          | - |
| 222  | Cdkn2a <sup>-/-</sup> _HSPCs | SINLV.SF.GFP.PRE | BM     | 6 | 34292786 | + | NM_008012    | Akr1b8        | + |
| 215  | Cdkn2a <sup>-/-</sup> _HSPCs | SINLV.SF.GFP.PRE | BM     | 6 | 36786943 | + | NM_001081206 | Dgki          | - |
| 210  | Cdkn2a <sup>-/-</sup> _HSPCs | SINLV.SF.GFP.PRE | SPLEEN | 6 | 39594358 | + | NM_139294    | Braf          | - |
| 210  | Cdkn2a <sup>-/-</sup> _HSPCs | SINLV.SF.GFP.PRE | SPLEEN | 6 | 39594449 | - | NM_139294    | Braf          | - |
| 210  | Cdkn2a <sup>-/-</sup> _HSPCs | SINLV.SF.GFP.PRE | SPLEEN | 6 | 39597221 | + | NM_139294    | Braf          | - |
| 210  | Cdkn2a <sup>-/-</sup> _HSPCs | SINLV.SF.GFP.PRE | SPLEEN | 6 | 39597569 | - | NM_139294    | Braf          | - |
| 238  | Cdkn2a <sup>-/-</sup> _HSPCs | SINLV.SF.GFP.PRE | SPLEEN | 6 | 40985840 | + | NM_023333    | 2210010C04Rik | - |
| 175  | Cdkn2a <sup>-/-</sup> _HSPCs | SINLV.SF.GFP.PRE | BM     | 6 | 42226440 | + | NM_007610    | Casp2         | + |
| 186  | Cdkn2a <sup>-/-</sup> _HSPCs | SINLV.SF.GFP.PRE | BM     | 6 | 42340119 | + | NM_001001452 | Tas2r143      | + |
| 186  | Cdkn2a <sup>-/-</sup> _HSPCs | SINLV.SF.GFP.PRE | BM     | 6 | 42340146 | + | NM_001001452 | Tas2r143      | + |
| 186  | Cdkn2a <sup>-/-</sup> _HSPCs | SINLV.SF.GFP.PRE | BM     | 6 | 42340266 | - | NM_001001452 | Tas2r143      | + |
| 175  | Cdkn2a <sup>-/-</sup> _HSPCs | SINLV.SF.GFP.PRE | BM     | 6 | 42340270 | - | NM_001001452 | Tas2r143      | + |
| 175  | Cdkn2a <sup>-/-</sup> _HSPCs | SINLV.SF.GFP.PRE | BM     | 6 | 42345378 | + | NM_001001452 | Tas2r143      | + |
| BULK | Cdkn2a <sup>-/-</sup> _HSPCs | SINLV.SF.GFP.PRE | BULK   | 6 | 43481800 | + | NM_013861    | Tpk1          | - |
| 175  | Cdkn2a <sup>-/-</sup> _HSPCs | SINLV.SF.GFP.PRE | BM     | 6 | 43495530 | - | NM_013861    | Tpk1          | - |
| 198  | Cdkn2a <sup>-/-</sup> _HSPCs | SINLV.SF.GFP.PRE | SPLEEN | 6 | 43497785 | - | NM_013861    | Tpk1          | - |
| 190  | Cdkn2a <sup>-/-</sup> _HSPCs | SINLV.SF.GFP.PRE | SPLEEN | 6 | 45199510 | + | NM_001004357 | Cntnap2       | + |
| 206  | Cdkn2a <sup>-/-</sup> _HSPCs | SINLV.SF.GFP.PRE | BM     | 6 | 45916563 | - | NM_001004357 | Cntnap2       | + |
| 222  | Cdkn2a <sup>-/-</sup> _HSPCs | SINLV.SF.GFP.PRE | SPLEEN | 6 | 47497664 | + | NM_001146689 | Ezh2          | - |
| 175  | Cdkn2a <sup>-/-</sup> _HSPCs | SINLV.SF.GFP.PRE | BM     | 6 | 47559477 | - | NM_001146689 | Ezh2          | - |
| 238  | Cdkn2a <sup>-/-</sup> _HSPCs | SINLV.SF.GFP.PRE | SPLEEN | 6 | 51825476 | - | NM_018773    | Skap2         | - |
| 198  | Cdkn2a <sup>-/-</sup> _HSPCs | SINLV.SF.GFP.PRE | SPLEEN | 6 | 51891686 | + | NM_018773    | Skap2         | - |
| 175  | Cdkn2a <sup>-/-</sup> _HSPCs | SINLV.SF.GFP.PRE | BM     | 6 | 51944106 | + | NM_018773    | Skap2         | - |
| 198  | Cdkn2a <sup>-/-</sup> _HSPCs | SINLV.SF.GFP.PRE | BM     | 6 | 56063068 | - | NM_001025568 | Pde1c         | - |
| 175  | Cdkn2a <sup>-/-</sup> _HSPCs | SINLV.SF.GFP.PRE | BM     | 6 | 58599653 | - | NM_011920    | Abcg2         | + |
| 198  | Cdkn2a <sup>-/-</sup> _HSPCs | SINLV.SF.GFP.PRE | SPLEEN | 6 | 60923733 | - | NM_009221    | Snca          | - |
| 210  | Cdkn2a <sup>-/-</sup> _HSPCs | SINLV.SF.GFP.PRE | SPLEEN | 6 | 61826726 | - | NM_009221    | Snca          | - |

|      |                              |                  |             |   |           |   |              |           |   |
|------|------------------------------|------------------|-------------|---|-----------|---|--------------|-----------|---|
| 237  | Cdkn2a <sup>-/-</sup> _HSPCs | SINLV.SF.GFP.PRE | BM          | 6 | 65017171  | - | NM_007958    | Smardc1   | + |
| 237  | Cdkn2a <sup>-/-</sup> _HSPCs | SINLV.SF.GFP.PRE | BM          | 6 | 65037502  | + | NM_007958    | Smardc1   | + |
| 237  | Cdkn2a <sup>-/-</sup> _HSPCs | SINLV.SF.GFP.PRE | BM          | 6 | 65037527  | + | NM_007958    | Smardc1   | + |
| 237  | Cdkn2a <sup>-/-</sup> _HSPCs | SINLV.SF.GFP.PRE | BM          | 6 | 65037586  | - | NM_007958    | Smardc1   | + |
| 303  | Cdkn2a <sup>-/-</sup> _HSPCs | SINLV.SF.GFP.PRE | BM          | 6 | 66199140  | + | NM_019499    | Mad21l    | + |
| 198  | Cdkn2a <sup>-/-</sup> _HSPCs | SINLV.SF.GFP.PRE | BM - SPLEEN | 6 | 66254096  | + | NM_019499    | Mad21l    | + |
| 190  | Cdkn2a <sup>-/-</sup> _HSPCs | SINLV.SF.GFP.PRE | BM          | 6 | 66381652  | + | NM_019499    | Mad21l    | + |
| 190  | Cdkn2a <sup>-/-</sup> _HSPCs | SINLV.SF.GFP.PRE | SPLEEN      | 6 | 66402068  | + | NM_019499    | Mad21l    | + |
| 175  | Cdkn2a <sup>-/-</sup> _HSPCs | SINLV.SF.GFP.PRE | BM          | 6 | 66891607  | - | NM_025278    | Gng12     | + |
| 219  | Cdkn2a <sup>-/-</sup> _HSPCs | SINLV.SF.GFP.PRE | SPLEEN      | 6 | 67226661  | + | NM_001113564 | Serbp1    | + |
| 194  | Cdkn2a <sup>-/-</sup> _HSPCs | SINLV.SF.GFP.PRE | BM          | 6 | 67494374  | - | NM_020047    | Tacstd2   | - |
| 222  | Cdkn2a <sup>-/-</sup> _HSPCs | SINLV.SF.GFP.PRE | SPLEEN      | 6 | 67495757  | + | NM_020047    | Tacstd2   | - |
| 175  | Cdkn2a <sup>-/-</sup> _HSPCs | SINLV.SF.GFP.PRE | BM          | 6 | 68516187  | - | NR_004434    | Rpr1l     | - |
| 215  | Cdkn2a <sup>-/-</sup> _HSPCs | SINLV.SF.GFP.PRE | BM          | 6 | 71802065  | + | NM_029673    | Immt      | + |
| 198  | Cdkn2a <sup>-/-</sup> _HSPCs | SINLV.SF.GFP.PRE | SPLEEN      | 6 | 80379355  | - | NM_178731    | Lrrtm4    | + |
| 190  | Cdkn2a <sup>-/-</sup> _HSPCs | SINLV.SF.GFP.PRE | SPLEEN      | 6 | 81884056  | + | NM_177884    | AW146020  | + |
| 237  | Cdkn2a <sup>-/-</sup> _HSPCs | SINLV.SF.GFP.PRE | BM          | 6 | 83364856  | - | NM_175277    | Bola3     | + |
| 207  | Cdkn2a <sup>-/-</sup> _HSPCs | SINLV.SF.GFP.PRE | SPLEEN      | 6 | 87520016  | + | NM_021381    | Prokr1    | - |
| 190  | Cdkn2a <sup>-/-</sup> _HSPCs | SINLV.SF.GFP.PRE | SPLEEN      | 6 | 97796300  | - | NM_001113198 | Mitf      | + |
| BULK | Cdkn2a <sup>-/-</sup> _HSPCs | SINLV.SF.GFP.PRE | BULK        | 6 | 99369581  | - | NM_053202    | Foxp1     | - |
| 175  | Cdkn2a <sup>-/-</sup> _HSPCs | SINLV.SF.GFP.PRE | BM          | 6 | 103289844 | + | NM_007697    | Chl1      | + |
| BULK | Cdkn2a <sup>-/-</sup> _HSPCs | SINLV.SF.GFP.PRE | BULK        | 6 | 108117774 | + | NM_145937    | Sumf1     | - |
| 237  | Cdkn2a <sup>-/-</sup> _HSPCs | SINLV.SF.GFP.PRE | BM          | 6 | 112252324 | + | NM_144799    | Lmcd1     | + |
| 175  | Cdkn2a <sup>-/-</sup> _HSPCs | SINLV.SF.GFP.PRE | BM          | 6 | 116212856 | + | NM_026585    | D6Wsu116e | + |
| 175  | Cdkn2a <sup>-/-</sup> _HSPCs | SINLV.SF.GFP.PRE | BM          | 6 | 116260978 | + | NM_001081317 | Anubl1    | - |
| 186  | Cdkn2a <sup>-/-</sup> _HSPCs | SINLV.SF.GFP.PRE | BM          | 6 | 117820528 | + | NM_001001792 | Zfp239    | + |
| 198  | Cdkn2a <sup>-/-</sup> _HSPCs | SINLV.SF.GFP.PRE | BM - SPLEEN | 6 | 119659976 | - | NM_053204    | Erc1      | - |
| 210  | Cdkn2a <sup>-/-</sup> _HSPCs | SINLV.SF.GFP.PRE | BM          | 6 | 122719243 | + | NM_011401    | Slc2a3    | - |
| 227  | Cdkn2a <sup>-/-</sup> _HSPCs | SINLV.SF.GFP.PRE | SPLEEN      | 6 | 129003638 | - | NM_153094    | Klrb1f    | + |
| 190  | Cdkn2a <sup>-/-</sup> _HSPCs | SINLV.SF.GFP.PRE | SPLEEN      | 6 | 144995050 | - | NM_001024468 | Bcat1     | - |
| 237  | Cdkn2a <sup>-/-</sup> _HSPCs | SINLV.SF.GFP.PRE | BM          | 6 | 145165701 | + | NM_021284    | Kras      | - |

|      |                              |                  |             |   |           |   |              |               |   |
|------|------------------------------|------------------|-------------|---|-----------|---|--------------|---------------|---|
| 175  | Cdkn2a <sup>-/-</sup> _HSPCs | SINLV.SF.GFP.PRE | BM          | 6 | 148441489 | + | NM_198967    | Tmtc1         | - |
| BULK | Cdkn2a <sup>-/-</sup> _HSPCs | SINLV.SF.GFP.PRE | BULK        | 7 | 5742020   | + | NM_001013012 | Zfp787        | - |
| 198  | Cdkn2a <sup>-/-</sup> _HSPCs | SINLV.SF.GFP.PRE | SPLEEN      | 7 | 6324994   | + | NM_001025163 | Zfp78         | + |
| 210  | Cdkn2a <sup>-/-</sup> _HSPCs | SINLV.SF.GFP.PRE | SPLEEN      | 7 | 11078425  | + | NM_009577    | Zik1          | - |
| 190  | Cdkn2a <sup>-/-</sup> _HSPCs | SINLV.SF.GFP.PRE | SPLEEN      | 7 | 16611745  | - | NM_001081418 | Gltscr1       | - |
| 219  | Cdkn2a <sup>-/-</sup> _HSPCs | SINLV.SF.GFP.PRE | SPLEEN      | 7 | 16993785  | + | NM_198631    | Zc3h4         | + |
| 219  | Cdkn2a <sup>-/-</sup> _HSPCs | SINLV.SF.GFP.PRE | SPLEEN      | 7 | 24923948  | - | NM_019941    | Zfp235        | + |
| 237  | Cdkn2a <sup>-/-</sup> _HSPCs | SINLV.SF.GFP.PRE | BM          | 7 | 47629110  | - | NM_021387    | Vstm2b        | + |
| 207  | Cdkn2a <sup>-/-</sup> _HSPCs | SINLV.SF.GFP.PRE | SPLEEN      | 7 | 49739006  | + | NM_027702    | 4933421I07Rik | - |
| 237  | Cdkn2a <sup>-/-</sup> _HSPCs | SINLV.SF.GFP.PRE | BM          | 7 | 62157374  | - | NM_178705    | Luzp2         | + |
| 210  | Cdkn2a <sup>-/-</sup> _HSPCs | SINLV.SF.GFP.PRE | SPLEEN      | 7 | 65965747  | + | NM_009728    | Atp10a        | + |
| 190  | Cdkn2a <sup>-/-</sup> _HSPCs | SINLV.SF.GFP.PRE | SPLEEN      | 7 | 66528408  | - | NM_173010    | Ube3a         | + |
| 198  | Cdkn2a <sup>-/-</sup> _HSPCs | SINLV.SF.GFP.PRE | SPLEEN      | 7 | 73210918  | + | NM_021336    | Snrpa1        | + |
| 206  | Cdkn2a <sup>-/-</sup> _HSPCs | SINLV.SF.GFP.PRE | BM          | 7 | 74415054  | + | NM_001033713 | Mef2a         | - |
| 198  | Cdkn2a <sup>-/-</sup> _HSPCs | SINLV.SF.GFP.PRE | SPLEEN      | 7 | 78673542  | - | NM_001024703 | Mctp2         | - |
| 194  | Cdkn2a <sup>-/-</sup> _HSPCs | SINLV.SF.GFP.PRE | BM          | 7 | 79320182  | + | NM_001024703 | Mctp2         | - |
| 299  | Cdkn2a <sup>-/-</sup> _HSPCs | SINLV.SF.GFP.PRE | BM          | 7 | 79328334  | - | NM_017462    | Polg          | - |
| 222  | Cdkn2a <sup>-/-</sup> _HSPCs | SINLV.SF.GFP.PRE | BM          | 7 | 79395768  | + | NM_001024703 | Mctp2         | - |
| 175  | Cdkn2a <sup>-/-</sup> _HSPCs | SINLV.SF.GFP.PRE | BM          | 7 | 81657892  | + | NM_001038643 | Slco3a1       | - |
| 198  | Cdkn2a <sup>-/-</sup> _HSPCs | SINLV.SF.GFP.PRE | BM - SPLEEN | 7 | 83255962  | - | NM_001122780 | Klhl25        | + |
| 222  | Cdkn2a <sup>-/-</sup> _HSPCs | SINLV.SF.GFP.PRE | BM - SPLEEN | 7 | 84311286  | - | NM_008746    | Ntrk3         | - |
| BULK | Cdkn2a <sup>-/-</sup> _HSPCs | SINLV.SF.GFP.PRE | BULK        | 7 | 88285100  | + | NM_028238    | Rab38         | + |
| 198  | Cdkn2a <sup>-/-</sup> _HSPCs | SINLV.SF.GFP.PRE | SPLEEN      | 7 | 94385791  | + | NM_015760    | Nox4          | + |
| 238  | Cdkn2a <sup>-/-</sup> _HSPCs | SINLV.SF.GFP.PRE | SPLEEN      | 7 | 96363976  | + | NM_028343    | Tmem135       | - |
| 227  | Cdkn2a <sup>-/-</sup> _HSPCs | SINLV.SF.GFP.PRE | SPLEEN      | 7 | 96960716  | + | NM_181407    | Me3           | + |
| 175  | Cdkn2a <sup>-/-</sup> _HSPCs | SINLV.SF.GFP.PRE | BM          | 7 | 98381749  | + | NM_011807    | Dlg2          | + |
| 175  | Cdkn2a <sup>-/-</sup> _HSPCs | SINLV.SF.GFP.PRE | BM          | 7 | 99588204  | + | NM_011807    | Dlg2          | + |
| 198  | Cdkn2a <sup>-/-</sup> _HSPCs | SINLV.SF.GFP.PRE | BM          | 7 | 102965758 | - | NM_011858    | Odz4          | + |
| 174  | Cdkn2a <sup>-/-</sup> _HSPCs | SINLV.SF.GFP.PRE | BM          | 7 | 106249746 | - | NM_001001318 | EG209380      | - |
| 227  | Cdkn2a <sup>-/-</sup> _HSPCs | SINLV.SF.GFP.PRE | SPLEEN      | 7 | 106702367 | + | NM_177231    | Arrb1         | + |
| 227  | Cdkn2a <sup>-/-</sup> _HSPCs | SINLV.SF.GFP.PRE | SPLEEN      | 7 | 111445689 | + | NM_023835    | Trim12        | - |

|      |                              |                  |        |   |           |   |              |         |   |
|------|------------------------------|------------------|--------|---|-----------|---|--------------|---------|---|
| 227  | Cdkn2a <sup>-/-</sup> _HSPCs | SINLV.SF.GFP.PRE | SPLEEN | 7 | 111541676 | + | NM_009099    | Trim30  | - |
| 174  | Cdkn2a <sup>-/-</sup> _HSPCs | SINLV.SF.GFP.PRE | SPLEEN | 7 | 113599611 | - | NR_003967    | Gm4759  | - |
| 194  | Cdkn2a <sup>-/-</sup> _HSPCs | SINLV.SF.GFP.PRE | BM     | 7 | 114875746 | + | NM_008905    | Ppfbp2  | + |
| 222  | Cdkn2a <sup>-/-</sup> _HSPCs | SINLV.SF.GFP.PRE | SPLEEN | 7 | 119171105 | + | NM_133758    | Usp47   | + |
| 237  | Cdkn2a <sup>-/-</sup> _HSPCs | SINLV.SF.GFP.PRE | BM     | 7 | 120708171 | + | NM_026143    | Far1    | + |
| 198  | Cdkn2a <sup>-/-</sup> _HSPCs | SINLV.SF.GFP.PRE | SPLEEN | 7 | 121606808 | + | NM_011055    | Pde3b   | + |
| 219  | Cdkn2a <sup>-/-</sup> _HSPCs | SINLV.SF.GFP.PRE | SPLEEN | 7 | 133329775 | - | NM_028816    | Xpo6    | - |
| 174  | Cdkn2a <sup>-/-</sup> _HSPCs | SINLV.SF.GFP.PRE | SPLEEN | 7 | 137888131 | + | NM_001004468 | Tacc2   | + |
| 198  | Cdkn2a <sup>-/-</sup> _HSPCs | SINLV.SF.GFP.PRE | SPLEEN | 7 | 140951277 | - | NM_133941    | Dhx32   | - |
| 217  | Cdkn2a <sup>-/-</sup> _HSPCs | SINLV.SF.GFP.PRE | BM     | 7 | 148365296 | + | NM_001130443 | Hras1   | - |
| 237  | Cdkn2a <sup>-/-</sup> _HSPCs | SINLV.SF.GFP.PRE | BM     | 8 | 3166452   | + | NM_010568    | Insr    | - |
| 198  | Cdkn2a <sup>-/-</sup> _HSPCs | SINLV.SF.GFP.PRE | SPLEEN | 8 | 3697295   | + | NM_013517    | Fcer2a  | - |
| 227  | Cdkn2a <sup>-/-</sup> _HSPCs | SINLV.SF.GFP.PRE | SPLEEN | 8 | 5096061   | - | NM_011388    | Slc10a2 | - |
| 198  | Cdkn2a <sup>-/-</sup> _HSPCs | SINLV.SF.GFP.PRE | SPLEEN | 8 | 6467943   | - | NM_011388    | Slc10a2 | - |
| 206  | Cdkn2a <sup>-/-</sup> _HSPCs | SINLV.SF.GFP.PRE | BM     | 8 | 11623834  | + | NM_133971    | Ankrd10 | - |
| 206  | Cdkn2a <sup>-/-</sup> _HSPCs | SINLV.SF.GFP.PRE | BM     | 8 | 11623901  | - | NM_133971    | Ankrd10 | - |
| 206  | Cdkn2a <sup>-/-</sup> _HSPCs | SINLV.SF.GFP.PRE | BM     | 8 | 11623926  | - | NM_133971    | Ankrd10 | - |
| 198  | Cdkn2a <sup>-/-</sup> _HSPCs | SINLV.SF.GFP.PRE | BM     | 8 | 13170503  | - | NM_010684    | Lamp1   | + |
| 210  | Cdkn2a <sup>-/-</sup> _HSPCs | SINLV.SF.GFP.PRE | SPLEEN | 8 | 13638637  | + | NM_009025    | Rasa3   | - |
| 190  | Cdkn2a <sup>-/-</sup> _HSPCs | SINLV.SF.GFP.PRE | SPLEEN | 8 | 18782459  | - | NM_173189    | Mcph1   | + |
| 175  | Cdkn2a <sup>-/-</sup> _HSPCs | SINLV.SF.GFP.PRE | BM     | 8 | 23361324  | - | NM_019576    | Thsd1   | + |
| 237  | Cdkn2a <sup>-/-</sup> _HSPCs | SINLV.SF.GFP.PRE | BM     | 8 | 24313651  | + | NM_018743    | Agpat6  | - |
| 198  | Cdkn2a <sup>-/-</sup> _HSPCs | SINLV.SF.GFP.PRE | SPLEEN | 8 | 29785449  | + | NM_153135    | Unc5d   | - |
| BULK | Cdkn2a <sup>-/-</sup> _HSPCs | SINLV.SF.GFP.PRE | BULK   | 8 | 32693394  | - | NM_134161    | fut10   | + |
| 219  | Cdkn2a <sup>-/-</sup> _HSPCs | SINLV.SF.GFP.PRE | SPLEEN | 8 | 34468745  | - | NM_001122822 | Wrm     | - |
| 236  | Cdkn2a <sup>-/-</sup> _HSPCs | SINLV.SF.GFP.PRE | BM     | 8 | 35819435  | + | NM_176933    | Dusp4   | + |
| 210  | Cdkn2a <sup>-/-</sup> _HSPCs | SINLV.SF.GFP.PRE | SPLEEN | 8 | 40132121  | + | NM_030254    | Tusc3   | + |
| 236  | Cdkn2a <sup>-/-</sup> _HSPCs | SINLV.SF.GFP.PRE | BM     | 8 | 41531974  | - | NM_178395    | Zdhc2   | + |
| 175  | Cdkn2a <sup>-/-</sup> _HSPCs | SINLV.SF.GFP.PRE | BM     | 8 | 41621258  | + | NM_033560    | Vps37a  | + |
| 186  | Cdkn2a <sup>-/-</sup> _HSPCs | SINLV.SF.GFP.PRE | BM     | 8 | 41985410  | - | NM_001044740 | Slc7a2  | + |
| 194  | Cdkn2a <sup>-/-</sup> _HSPCs | SINLV.SF.GFP.PRE | BM     | 8 | 47911145  | - | NM_008391    | Irf2    | + |

|      |                              |                  |             |   |           |   |              |          |   |
|------|------------------------------|------------------|-------------|---|-----------|---|--------------|----------|---|
| BULK | Cdkn2a <sup>-/-</sup> _HSPCs | SINLV.SF.GFP.PRE | BULK        | 8 | 48082564  | + | NM_001001184 | Ccdc111  | - |
| BULK | Cdkn2a <sup>-/-</sup> _HSPCs | SINLV.SF.GFP.PRE | BULK        | 8 | 48310164  | + | NM_008391    | Irf2     | + |
| 210  | Cdkn2a <sup>-/-</sup> _HSPCs | SINLV.SF.GFP.PRE | SPLEEN      | 8 | 54977124  | - | NM_009506    | Vegfc    | + |
| 206  | Cdkn2a <sup>-/-</sup> _HSPCs | SINLV.SF.GFP.PRE | BM          | 8 | 55188379  | + | NM_009506    | Vegfc    | + |
| 206  | Cdkn2a <sup>-/-</sup> _HSPCs | SINLV.SF.GFP.PRE | BM          | 8 | 55188548  | - | NM_009506    | Vegfc    | + |
| 227  | Cdkn2a <sup>-/-</sup> _HSPCs | SINLV.SF.GFP.PRE | SPLEEN      | 8 | 55203414  | + | NM_009506    | Vegfc    | + |
| 227  | Cdkn2a <sup>-/-</sup> _HSPCs | SINLV.SF.GFP.PRE | SPLEEN      | 8 | 55203525  | - | NM_009506    | Vegfc    | + |
| 222  | Cdkn2a <sup>-/-</sup> _HSPCs | SINLV.SF.GFP.PRE | SPLEEN      | 8 | 55305520  | + | NM_009506    | Vegfc    | + |
| 175  | Cdkn2a <sup>-/-</sup> _HSPCs | SINLV.SF.GFP.PRE | BM          | 8 | 55914155  | - | NM_028220    | Wdr17    | - |
| 190  | Cdkn2a <sup>-/-</sup> _HSPCs | SINLV.SF.GFP.PRE | SPLEEN      | 8 | 59070735  | + | NM_015791    | Fbxo8    | + |
| 175  | Cdkn2a <sup>-/-</sup> _HSPCs | SINLV.SF.GFP.PRE | BM          | 8 | 63498708  | + | NM_175089    | Nek1     | + |
| 190  | Cdkn2a <sup>-/-</sup> _HSPCs | SINLV.SF.GFP.PRE | SPLEEN      | 8 | 64421190  | - | NM_001081215 | Ddx60    | + |
| 311  | Cdkn2a <sup>-/-</sup> _HSPCs | SINLV.SF.GFP.PRE | THYMUS      | 8 | 64845285  | + | NM_001081215 | BC013672 | + |
| 219  | Cdkn2a <sup>-/-</sup> _HSPCs | SINLV.SF.GFP.PRE | SPLEEN      | 8 | 66707594  | + | NM_009390    | Tll1     | - |
| 227  | Cdkn2a <sup>-/-</sup> _HSPCs | SINLV.SF.GFP.PRE | SPLEEN      | 8 | 67009379  | - | NM_013494    | Cpe      | - |
| 219  | Cdkn2a <sup>-/-</sup> _HSPCs | SINLV.SF.GFP.PRE | SPLEEN      | 8 | 67120989  | + | NM_009390    | Tll1     | - |
| 175  | Cdkn2a <sup>-/-</sup> _HSPCs | SINLV.SF.GFP.PRE | BM          | 8 | 72476528  | + | NM_001113346 | Gatad2a  | - |
| 186  | Cdkn2a <sup>-/-</sup> _HSPCs | SINLV.SF.GFP.PRE | BM          | 8 | 82225560  | - | NM_015751    | Abce1    | - |
| 215  | Cdkn2a <sup>-/-</sup> _HSPCs | SINLV.SF.GFP.PRE | BM          | 8 | 82225565  | - | NM_015751    | Abce1    | - |
| BULK | Cdkn2a <sup>-/-</sup> _HSPCs | SINLV.SF.GFP.PRE | BULK        | 8 | 82593636  | + | NM_015751    | Abce1    | - |
| 186  | Cdkn2a <sup>-/-</sup> _HSPCs | SINLV.SF.GFP.PRE | BM          | 8 | 82597737  | - | NM_015751    | Abce1    | - |
| 174  | Cdkn2a <sup>-/-</sup> _HSPCs | SINLV.SF.GFP.PRE | SPLEEN      | 8 | 84865087  | - | NM_008357    | Il15     | - |
| 227  | Cdkn2a <sup>-/-</sup> _HSPCs | SINLV.SF.GFP.PRE | SPLEEN      | 8 | 85469371  | + | NM_177378    | Rnf150   | + |
| 222  | Cdkn2a <sup>-/-</sup> _HSPCs | SINLV.SF.GFP.PRE | BM          | 8 | 87105077  | + | NM_007578    | Cacna1a  | + |
| 175  | Cdkn2a <sup>-/-</sup> _HSPCs | SINLV.SF.GFP.PRE | BM          | 8 | 98271685  | - | NM_153164    | Cnot1    | - |
| 198  | Cdkn2a <sup>-/-</sup> _HSPCs | SINLV.SF.GFP.PRE | SPLEEN      | 8 | 105939788 | - | NM_009866    | Cdh11    | - |
| 198  | Cdkn2a <sup>-/-</sup> _HSPCs | SINLV.SF.GFP.PRE | SPLEEN      | 8 | 113807282 | + | NM_146218    | Rfwd3    | - |
| 222  | Cdkn2a <sup>-/-</sup> _HSPCs | SINLV.SF.GFP.PRE | BM          | 8 | 126453441 | + | NM_172288    | Nup133   | - |
| 198  | Cdkn2a <sup>-/-</sup> _HSPCs | SINLV.SF.GFP.PRE | BM - SPLEEN | 8 | 129365073 | + | NM_024214    | Tomm20   | - |
| 198  | Cdkn2a <sup>-/-</sup> _HSPCs | SINLV.SF.GFP.PRE | SPLEEN      | 8 | 131249478 | - | NM_010578    | Itgb1    | + |
| 222  | Cdkn2a <sup>-/-</sup> _HSPCs | SINLV.SF.GFP.PRE | SPLEEN      | 9 | 3022754   | + | NM_026303    | Alkbh8   | + |

|      |                              |                  |             |   |          |   |              |          |   |
|------|------------------------------|------------------|-------------|---|----------|---|--------------|----------|---|
| 175  | Cdkn2a <sup>-/-</sup> _HSPCs | SINLV.SF.GFP.PRE | BM          | 9 | 3345615  | + | NM_026303    | Alkbh8   | + |
| 227  | Cdkn2a <sup>-/-</sup> _HSPCs | SINLV.SF.GFP.PRE | SPLEEN      | 9 | 3452697  | + | NM_027545    | Cwf19l2  | + |
| 227  | Cdkn2a <sup>-/-</sup> _HSPCs | SINLV.SF.GFP.PRE | SPLEEN      | 9 | 4299503  | + | NM_026276    | Aasdhppt | - |
| 227  | Cdkn2a <sup>-/-</sup> _HSPCs | SINLV.SF.GFP.PRE | SPLEEN      | 9 | 5297208  | - | NM_009807    | Casp1    | + |
| 198  | Cdkn2a <sup>-/-</sup> _HSPCs | SINLV.SF.GFP.PRE | SPLEEN      | 9 | 5353585  | - | NM_009808    | Casp12   | + |
| 210  | Cdkn2a <sup>-/-</sup> _HSPCs | SINLV.SF.GFP.PRE | SPLEEN      | 9 | 7011551  | - | NM_029851    | Dync2h1  | - |
| 219  | Cdkn2a <sup>-/-</sup> _HSPCs | SINLV.SF.GFP.PRE | SPLEEN      | 9 | 13352799 | - | XM_486185    | Maml2    | + |
| 198  | Cdkn2a <sup>-/-</sup> _HSPCs | SINLV.SF.GFP.PRE | BM - SPLEEN | 9 | 13792441 | + | NM_176836    | Fam76b   | + |
| 236  | Cdkn2a <sup>-/-</sup> _HSPCs | SINLV.SF.GFP.PRE | BM          | 9 | 18123798 | - | NM_028279    | Naalad2  | - |
| 301  | Cdkn2a <sup>-/-</sup> _HSPCs | SINLV.SF.GFP.PRE | THYMUS      | 9 | 22396737 | + | NM_181316    | Bbs9     | + |
| 198  | Cdkn2a <sup>-/-</sup> _HSPCs | SINLV.SF.GFP.PRE | BM - SPLEEN | 9 | 32975996 | - | NM_001038642 | Ets1     | + |
| 222  | Cdkn2a <sup>-/-</sup> _HSPCs | SINLV.SF.GFP.PRE | BM - SPLEEN | 9 | 34988373 | + | NM_027030    | Dcps     | - |
| 175  | Cdkn2a <sup>-/-</sup> _HSPCs | SINLV.SF.GFP.PRE | BM          | 9 | 35112895 | - | NM_028040    | Rpusd4   | + |
| 219  | Cdkn2a <sup>-/-</sup> _HSPCs | SINLV.SF.GFP.PRE | SPLEEN      | 9 | 35113064 | - | NM_028040    | Rpusd4   | + |
| 222  | Cdkn2a <sup>-/-</sup> _HSPCs | SINLV.SF.GFP.PRE | BM          | 9 | 35275200 | + | NM_021339    | Cdon     | + |
| 237  | Cdkn2a <sup>-/-</sup> _HSPCs | SINLV.SF.GFP.PRE | BM          | 9 | 38544067 | - | NM_001145957 | Vwa5a    | + |
| 198  | Cdkn2a <sup>-/-</sup> _HSPCs | SINLV.SF.GFP.PRE | SPLEEN      | 9 | 38760865 | + | NM_146272    | Olfir930 | + |
| BULK | Cdkn2a <sup>-/-</sup> _HSPCs | SINLV.SF.GFP.PRE | BULK        | 9 | 41607449 | - | NM_011436    | Sorl1    | - |
| 175  | Cdkn2a <sup>-/-</sup> _HSPCs | SINLV.SF.GFP.PRE | BM          | 9 | 50719474 | - | NM_178710    | Sik2     | - |
| 227  | Cdkn2a <sup>-/-</sup> _HSPCs | SINLV.SF.GFP.PRE | SPLEEN      | 9 | 53143346 | + | NM_176846    | Exph5    | + |
| 190  | Cdkn2a <sup>-/-</sup> _HSPCs | SINLV.SF.GFP.PRE | SPLEEN      | 9 | 54751444 | + | NM_022655    | Ireb2    | + |
| 198  | Cdkn2a <sup>-/-</sup> _HSPCs | SINLV.SF.GFP.PRE | SPLEEN      | 9 | 55947489 | + | NM_011193    | Pstpip1  | + |
| 190  | Cdkn2a <sup>-/-</sup> _HSPCs | SINLV.SF.GFP.PRE | SPLEEN      | 9 | 57567082 | - | NM_153799    | Ede3     | + |
| 174  | Cdkn2a <sup>-/-</sup> _HSPCs | SINLV.SF.GFP.PRE | BM          | 9 | 59601618 | + | XM_917816.2  | Myo9a    | + |
| 174  | Cdkn2a <sup>-/-</sup> _HSPCs | SINLV.SF.GFP.PRE | SPLEEN      | 9 | 59651418 | + | NM_027838    | Senp8    | - |
| 174  | Cdkn2a <sup>-/-</sup> _HSPCs | SINLV.SF.GFP.PRE | SPLEEN      | 9 | 59651447 | - | NM_027838    | Senp8    | - |
| 174  | Cdkn2a <sup>-/-</sup> _HSPCs | SINLV.SF.GFP.PRE | SPLEEN      | 9 | 59651465 | - | NM_027838    | Senp8    | - |
| 174  | Cdkn2a <sup>-/-</sup> _HSPCs | SINLV.SF.GFP.PRE | SPLEEN      | 9 | 59651501 | - | NM_027838    | Senp8    | - |
| 238  | Cdkn2a <sup>-/-</sup> _HSPCs | SINLV.SF.GFP.PRE | SPLEEN      | 9 | 65864150 | + | NM_173185    | Csnk1g1  | + |
| 237  | Cdkn2a <sup>-/-</sup> _HSPCs | SINLV.SF.GFP.PRE | BM          | 9 | 66435176 | + | NM_144937    | Usp3     | - |
| BULK | Cdkn2a <sup>-/-</sup> _HSPCs | SINLV.SF.GFP.PRE | BULK        | 9 | 69199914 | + | NM_145618    | Narg2    | + |



|      |                              |                  |             |    |           |   |              |               |   |
|------|------------------------------|------------------|-------------|----|-----------|---|--------------|---------------|---|
| 198  | Cdkn2a <sup>-/-</sup> _HSPCs | SINLV.SF.GFP.PRE | BM - SPLEEN | 9  | 70566356  | - | NM_007399    | Adam10        | + |
| 174  | Cdkn2a <sup>-/-</sup> _HSPCs | SINLV.SF.GFP.PRE | SPLEEN      | 9  | 80978217  | + | NM_010482    | Htr1b         | - |
| 217  | Cdkn2a <sup>-/-</sup> _HSPCs | SINLV.SF.GFP.PRE | BM          | 9  | 82978752  | + | NM_026122    | Hmgn3         | - |
| 198  | Cdkn2a <sup>-/-</sup> _HSPCs | SINLV.SF.GFP.PRE | SPLEEN      | 9  | 88366432  | - | NM_019666    | Syncrip       | - |
| 227  | Cdkn2a <sup>-/-</sup> _HSPCs | SINLV.SF.GFP.PRE | SPLEEN      | 9  | 91892691  | + | NM_011636    | Plscr1        | + |
| 219  | Cdkn2a <sup>-/-</sup> _HSPCs | SINLV.SF.GFP.PRE | SPLEEN      | 9  | 92173296  | - | NM_008880    | Plscr2        | + |
| 198  | Cdkn2a <sup>-/-</sup> _HSPCs | SINLV.SF.GFP.PRE | SPLEEN      | 9  | 92214404  | + | NM_001033184 | 1700057G04Rik | + |
| 222  | Cdkn2a <sup>-/-</sup> _HSPCs | SINLV.SF.GFP.PRE | BM - SPLEEN | 9  | 95822327  | + | NM_019864    | Atr           | + |
| 238  | Cdkn2a <sup>-/-</sup> _HSPCs | SINLV.SF.GFP.PRE | SPLEEN      | 9  | 100832264 | - | NM_009282    | Stag1         | + |
| 194  | Cdkn2a <sup>-/-</sup> _HSPCs | SINLV.SF.GFP.PRE | BM          | 9  | 101110871 | + | NM_001161362 | 3222402P14Rik | + |
| 175  | Cdkn2a <sup>-/-</sup> _HSPCs | SINLV.SF.GFP.PRE | BM          | 9  | 107687619 | + | NM_011251    | Rbm6          | - |
| 198  | Cdkn2a <sup>-/-</sup> _HSPCs | SINLV.SF.GFP.PRE | SPLEEN      | 9  | 107696988 | + | NM_011251    | Rbm6          | - |
| 175  | Cdkn2a <sup>-/-</sup> _HSPCs | SINLV.SF.GFP.PRE | BM          | 9  | 110489902 | + | NM_001081340 | Setd2         | + |
| BULK | Cdkn2a <sup>-/-</sup> _HSPCs | SINLV.SF.GFP.PRE | BULK        | 9  | 115657576 | - |              | Gad1l         | + |
| 207  | Cdkn2a <sup>-/-</sup> _HSPCs | SINLV.SF.GFP.PRE | SPLEEN      | 9  | 115675115 | + | NM_028638    | Gad1l         | + |
| 206  | Cdkn2a <sup>-/-</sup> _HSPCs | SINLV.SF.GFP.PRE | BM          | 9  | 121454118 | - | NM_026915    | Lyzl4         | - |
| 175  | Cdkn2a <sup>-/-</sup> _HSPCs | SINLV.SF.GFP.PRE | BM          | 9  | 123456232 | + | NM_030692    | Sacm1l        | + |
| 222  | Cdkn2a <sup>-/-</sup> _HSPCs | SINLV.SF.GFP.PRE | SPLEEN      | 10 | 4821653   | + | NM_153399    | Syne1         | + |
| 175  | Cdkn2a <sup>-/-</sup> _HSPCs | SINLV.SF.GFP.PRE | BM          | 10 | 4831816   | + | NM_153399    | Syne1         | + |
| 210  | Cdkn2a <sup>-/-</sup> _HSPCs | SINLV.SF.GFP.PRE | SPLEEN      | 10 | 6534659   | - | NM_001159942 | Plekhg1       | - |
| 198  | Cdkn2a <sup>-/-</sup> _HSPCs | SINLV.SF.GFP.PRE | BM - SPLEEN | 10 | 7655557   | - | NM_138667    | Map3k7ip2     | - |
| BULK | Cdkn2a <sup>-/-</sup> _HSPCs | SINLV.SF.GFP.PRE | BULK        | 10 | 9473562   | - | NM_001081344 | Stxbp5        | - |
| 238  | Cdkn2a <sup>-/-</sup> _HSPCs | SINLV.SF.GFP.PRE | SPLEEN      | 10 | 15151426  | - | NM_008703    | Nmbr          | + |
| 222  | Cdkn2a <sup>-/-</sup> _HSPCs | SINLV.SF.GFP.PRE | SPLEEN      | 10 | 15696782  | + | NM_008703    | Nmbr          | + |
| 186  | Cdkn2a <sup>-/-</sup> _HSPCs | SINLV.SF.GFP.PRE | BM          | 10 | 16214323  | - | NM_010828    | Cited2        | + |
| 175  | Cdkn2a <sup>-/-</sup> _HSPCs | SINLV.SF.GFP.PRE | BM          | 10 | 16603978  | - | NM_010828    | Cited2        | + |
| 198  | Cdkn2a <sup>-/-</sup> _HSPCs | SINLV.SF.GFP.PRE | BM - SPLEEN | 10 | 17697650  | - | NM_001033432 | Heca          | - |
| 215  | Cdkn2a <sup>-/-</sup> _HSPCs | SINLV.SF.GFP.PRE | BM          | 10 | 17801220  | - | NM_001111065 | Reps1         | + |
| 309  | Cdkn2a <sup>-/-</sup> _HSPCs | SINLV.SF.GFP.PRE | BM          | 10 | 18043031  | - | NM_173390    | Nhs1l         | + |
| 190  | Cdkn2a <sup>-/-</sup> _HSPCs | SINLV.SF.GFP.PRE | SPLEEN      | 10 | 19924606  | - | NM_008635    | Mtap7         | + |
| 237  | Cdkn2a <sup>-/-</sup> _HSPCs | SINLV.SF.GFP.PRE | BM          | 10 | 24605072  | + | NM_027347    | Med23         | + |

|      |                              |                  |             |    |           |   |              |               |   |
|------|------------------------------|------------------|-------------|----|-----------|---|--------------|---------------|---|
| 198  | Cdkn2a <sup>-/-</sup> _HSPCs | SINLV.SF.GFP.PRE | BM          | 10 | 27067178  | - | NM_008481    | Lama2         | - |
| 227  | Cdkn2a <sup>-/-</sup> _HSPCs | SINLV.SF.GFP.PRE | SPLEEN      | 10 | 27159601  | + | NM_008481    | Lama2         | - |
| 222  | Cdkn2a <sup>-/-</sup> _HSPCs | SINLV.SF.GFP.PRE | BM          | 10 | 28159075  | + | NM_008983    | Ptprk         | + |
| 198  | Cdkn2a <sup>-/-</sup> _HSPCs | SINLV.SF.GFP.PRE | SPLEEN      | 10 | 30454369  | - | NM_172495    | Ncoa7         | - |
| 207  | Cdkn2a <sup>-/-</sup> _HSPCs | SINLV.SF.GFP.PRE | THYMUS      | 10 | 30499589  | + | NM_172495    | Ncoa7         | - |
| 190  | Cdkn2a <sup>-/-</sup> _HSPCs | SINLV.SF.GFP.PRE | SPLEEN      | 10 | 33667210  | - | NM_028287    | Zufsp         | - |
| BULK | Cdkn2a <sup>-/-</sup> _HSPCs | SINLV.SF.GFP.PRE | BULK        | 10 | 41505155  | + |              | Sesn1         | + |
| 222  | Cdkn2a <sup>-/-</sup> _HSPCs | SINLV.SF.GFP.PRE | BM          | 10 | 42508386  | - | NM_153055    | Sec63         | + |
| 222  | Cdkn2a <sup>-/-</sup> _HSPCs | SINLV.SF.GFP.PRE | BM          | 10 | 42511422  | + | NM_153055    | Sec63         | + |
| 187  | Cdkn2a <sup>-/-</sup> _HSPCs | SINLV.SF.GFP.PRE | BM          | 10 | 43655399  | + | NM_130892    | Rtn4ip1       | + |
| 175  | Cdkn2a <sup>-/-</sup> _HSPCs | SINLV.SF.GFP.PRE | BM          | 10 | 44295926  | + | NM_007548    | Prdm1         | - |
| 198  | Cdkn2a <sup>-/-</sup> _HSPCs | SINLV.SF.GFP.PRE | SPLEEN      | 10 | 51346747  | - | NM_153071    | Gprc6a        | - |
| 175  | Cdkn2a <sup>-/-</sup> _HSPCs | SINLV.SF.GFP.PRE | BM          | 10 | 54917511  | + | NM_001033385 | D630037F22Rik | - |
| 190  | Cdkn2a <sup>-/-</sup> _HSPCs | SINLV.SF.GFP.PRE | SPLEEN      | 10 | 55882339  | - | NM_001033385 | D630037F22Rik | - |
| 222  | Cdkn2a <sup>-/-</sup> _HSPCs | SINLV.SF.GFP.PRE | SPLEEN      | 10 | 61179662  | - | NM_178058    | Aifm2         | + |
| 175  | Cdkn2a <sup>-/-</sup> _HSPCs | SINLV.SF.GFP.PRE | BM          | 10 | 66607502  | - | NM_207221    | Jmjd1c        | + |
| 227  | Cdkn2a <sup>-/-</sup> _HSPCs | SINLV.SF.GFP.PRE | SPLEEN      | 10 | 66659281  | - | NM_207221    | Jmjd1c        | + |
| 219  | Cdkn2a <sup>-/-</sup> _HSPCs | SINLV.SF.GFP.PRE | SPLEEN      | 10 | 74985382  | - | NM_026095    | Snrpd3        | + |
| BULK | Cdkn2a <sup>-/-</sup> _HSPCs | SINLV.SF.GFP.PRE | BULK        | 10 | 76741987  | - | NM_001024837 | Adarb1        | - |
| 207  | Cdkn2a <sup>-/-</sup> _HSPCs | SINLV.SF.GFP.PRE | BM          | 10 | 79513262  | - | NM_011492    | Stk11         | + |
| 207  | Cdkn2a <sup>-/-</sup> _HSPCs | SINLV.SF.GFP.PRE | SPLEEN      | 10 | 79572878  | - | NM_011492    | Stk11         | + |
| BULK | Cdkn2a <sup>-/-</sup> _HSPCs | SINLV.SF.GFP.PRE | BULK        | 10 | 85445209  | - | NM_177772    | Bpil2         | - |
| 175  | Cdkn2a <sup>-/-</sup> _HSPCs | SINLV.SF.GFP.PRE | BM          | 10 | 86247120  | + | NM_175331    | Nt5dc3        | + |
| 190  | Cdkn2a <sup>-/-</sup> _HSPCs | SINLV.SF.GFP.PRE | SPLEEN      | 10 | 89133822  | + | NM_198021    | Scyl2         | - |
| 198  | Cdkn2a <sup>-/-</sup> _HSPCs | SINLV.SF.GFP.PRE | SPLEEN      | 10 | 94228565  | + | NM_029852    | Ccdc41        | + |
| 198  | Cdkn2a <sup>-/-</sup> _HSPCs | SINLV.SF.GFP.PRE | SPLEEN      | 10 | 95817977  | - | NM_007569    | Btg1          | + |
| 237  | Cdkn2a <sup>-/-</sup> _HSPCs | SINLV.SF.GFP.PRE | BM          | 10 | 96007656  | + | NM_007569    | Btg1          | + |
| 198  | Cdkn2a <sup>-/-</sup> _HSPCs | SINLV.SF.GFP.PRE | SPLEEN      | 10 | 96047350  | - | NM_007569    | Btg1          | + |
| 238  | Cdkn2a <sup>-/-</sup> _HSPCs | SINLV.SF.GFP.PRE | SPLEEN      | 10 | 98400892  | - | NM_026482    | Atp2b1        | + |
| 222  | Cdkn2a <sup>-/-</sup> _HSPCs | SINLV.SF.GFP.PRE | BM - SPLEEN | 10 | 100571037 | - | NM_001081246 | 1700017N19Rik | + |
| 175  | Cdkn2a <sup>-/-</sup> _HSPCs | SINLV.SF.GFP.PRE | BM          | 10 | 100947716 | - | NM_001081246 | 1700017N19Rik | + |

|      |                              |                  |             |    |           |   |              |          |   |
|------|------------------------------|------------------|-------------|----|-----------|---|--------------|----------|---|
| 222  | Cdkn2a <sup>-/-</sup> _HSPCs | SINLV.SF.GFP.PRE | BM - SPLEEN | 10 | 101840172 | + | NM_026243    | Mgat4c   | + |
| 175  | Cdkn2a <sup>-/-</sup> _HSPCs | SINLV.SF.GFP.PRE | BM          | 10 | 101861801 | + | NM_026243    | Mgat4c   | + |
| BULK | Cdkn2a <sup>-/-</sup> _HSPCs | SINLV.SF.GFP.PRE | BULK        | 10 | 107583981 | - | NM_027892    | Ppp1r12a | + |
| 238  | Cdkn2a <sup>-/-</sup> _HSPCs | SINLV.SF.GFP.PRE | SPLEEN      | 10 | 109375118 | + | NM_001081035 | Nav3     | - |
| 175  | Cdkn2a <sup>-/-</sup> _HSPCs | SINLV.SF.GFP.PRE | BM          | 10 | 109420442 | - | NM_001081035 | Nav3     | - |
| 209  | Cdkn2a <sup>-/-</sup> _HSPCs | SINLV.SF.GFP.PRE | THYMUS      | 10 | 110691113 | - | NM_001003717 | Osbp18   | + |
| 220  | Cdkn2a <sup>-/-</sup> _HSPCs | SINLV.SF.GFP.PRE | BM          | 10 | 125404318 | - | NM_177152    | Lrig3    | + |
| 222  | Cdkn2a <sup>-/-</sup> _HSPCs | SINLV.SF.GFP.PRE | SPLEEN      | 10 | 125438425 | - | NM_177152    | Lrig3    | + |
| 190  | Cdkn2a <sup>-/-</sup> _HSPCs | SINLV.SF.GFP.PRE | SPLEEN      | 10 | 126850555 | - | NM_027900    | R3hdm2   | + |
| 227  | Cdkn2a <sup>-/-</sup> _HSPCs | SINLV.SF.GFP.PRE | SPLEEN      | 11 | 3089049   | - | NM_030207    | Sfi1     | - |
| 310  | Cdkn2a <sup>-/-</sup> _HSPCs | SINLV.SF.GFP.PRE | BM          | 11 | 4071240   | + | NM_026175    | Sf3a1    | + |
| BULK | Cdkn2a <sup>-/-</sup> _HSPCs | SINLV.SF.GFP.PRE | BULK        | 11 | 6079733   | - | NM_173748    | Nudcd3   | - |
| 222  | Cdkn2a <sup>-/-</sup> _HSPCs | SINLV.SF.GFP.PRE | BM - SPLEEN | 11 | 11407868  | - | NM_015785    | Zpbp     | - |
| 174  | Cdkn2a <sup>-/-</sup> _HSPCs | SINLV.SF.GFP.PRE | SPLEEN      | 11 | 17087201  | - | NM_024459    | Ppp3r1   | + |
| 210  | Cdkn2a <sup>-/-</sup> _HSPCs | SINLV.SF.GFP.PRE | SPLEEN      | 11 | 18422438  | - | NM_010789    | Meis1    | - |
| BULK | Cdkn2a <sup>-/-</sup> _HSPCs | SINLV.SF.GFP.PRE | BULK        | 11 | 18851411  | + | NM_010789    | Meis1    | - |
| 220  | Cdkn2a <sup>-/-</sup> _HSPCs | SINLV.SF.GFP.PRE | BM          | 11 | 20108654  | - | NM_008996    | Rab1     | + |
| 217  | Cdkn2a <sup>-/-</sup> _HSPCs | SINLV.SF.GFP.PRE | BM          | 11 | 24266525  | + | NM_001159289 | Bcl11a   | + |
| 174  | Cdkn2a <sup>-/-</sup> _HSPCs | SINLV.SF.GFP.PRE | SPLEEN      | 11 | 25023562  | + | NM_001159289 | Bcl11a   | + |
| 175  | Cdkn2a <sup>-/-</sup> _HSPCs | SINLV.SF.GFP.PRE | BM          | 11 | 29347124  | + | NM_176841    | Ccdc88a  | + |
| 238  | Cdkn2a <sup>-/-</sup> _HSPCs | SINLV.SF.GFP.PRE | SPLEEN      | 11 | 34537707  | + | NM_033374    | Dock2    | - |
| 236  | Cdkn2a <sup>-/-</sup> _HSPCs | SINLV.SF.GFP.PRE | BM          | 11 | 36760531  | + | NM_011856    | Odz2     | - |
| 238  | Cdkn2a <sup>-/-</sup> _HSPCs | SINLV.SF.GFP.PRE | SPLEEN      | 11 | 42984451  | + | NM_176999    | Atp10b   | + |
| 237  | Cdkn2a <sup>-/-</sup> _HSPCs | SINLV.SF.GFP.PRE | BM          | 11 | 43067057  | - | NM_176999    | Atp10b   | + |
| 210  | Cdkn2a <sup>-/-</sup> _HSPCs | SINLV.SF.GFP.PRE | SPLEEN      | 11 | 44348995  | - | NM_028862    | Rnf145   | + |
| 175  | Cdkn2a <sup>-/-</sup> _HSPCs | SINLV.SF.GFP.PRE | BM          | 11 | 46899462  | + | NM_011891    | Sgcd     | - |
| 186  | Cdkn2a <sup>-/-</sup> _HSPCs | SINLV.SF.GFP.PRE | BM          | 11 | 47529610  | + | NM_011891    | Sgcd     | - |
| 215  | Cdkn2a <sup>-/-</sup> _HSPCs | SINLV.SF.GFP.PRE | BM          | 11 | 51811830  | - | NM_009458    | Ube2b    | - |
| 238  | Cdkn2a <sup>-/-</sup> _HSPCs | SINLV.SF.GFP.PRE | SPLEEN      | 11 | 53171059  | + | NM_033565    | Aff4     | + |
| 198  | Cdkn2a <sup>-/-</sup> _HSPCs | SINLV.SF.GFP.PRE | SPLEEN      | 11 | 63775940  | - | NM_178379    | Cox10    | - |
| 175  | Cdkn2a <sup>-/-</sup> _HSPCs | SINLV.SF.GFP.PRE | BM          | 11 | 69449499  | + | NM_011814    | Fxr2     | + |

|      |                              |                  |             |    |           |   |              |               |   |
|------|------------------------------|------------------|-------------|----|-----------|---|--------------|---------------|---|
| 237  | Cdkn2a <sup>-/-</sup> _HSPCs | SINLV.SF.GFP.PRE | BM          | 11 | 74503693  | + | NM_013625    | Pafah1b1      | - |
| 175  | Cdkn2a <sup>-/-</sup> _HSPCs | SINLV.SF.GFP.PRE | BM          | 11 | 74871851  | - | NM_001002764 | Smg6          | + |
| 207  | Cdkn2a <sup>-/-</sup> _HSPCs | SINLV.SF.GFP.PRE | SPLEEN      | 11 | 80553265  | - | NM_177390    | Myo1d         | - |
| 198  | Cdkn2a <sup>-/-</sup> _HSPCs | SINLV.SF.GFP.PRE | BM - SPLEEN | 11 | 86458346  | + | NM_029478    | Tmem49        | + |
| 217  | Cdkn2a <sup>-/-</sup> _HSPCs | SINLV.SF.GFP.PRE | BM          | 11 | 90470202  | - | NM_011505    | Stxbp4        | - |
| 222  | Cdkn2a <sup>-/-</sup> _HSPCs | SINLV.SF.GFP.PRE | BM - SPLEEN | 11 | 93459685  | - | NM_028296    | Car10         | + |
| 215  | Cdkn2a <sup>-/-</sup> _HSPCs | SINLV.SF.GFP.PRE | BM          | 11 | 93459689  | - | NM_028296    | Car10         | + |
| 222  | Cdkn2a <sup>-/-</sup> _HSPCs | SINLV.SF.GFP.PRE | BM          | 11 | 95588642  | - | NM_201609    | Zfp652        | + |
| BULK | Cdkn2a <sup>-/-</sup> _HSPCs | SINLV.SF.GFP.PRE | BULK        | 11 | 97494097  | + | NM_139311    | Mllt6         | + |
| 198  | Cdkn2a <sup>-/-</sup> _HSPCs | SINLV.SF.GFP.PRE | BM          | 11 | 97705305  | + | NM_001080935 | B230217C12Rik | + |
| 206  | Cdkn2a <sup>-/-</sup> _HSPCs | SINLV.SF.GFP.PRE | BM          | 11 | 102014938 | + | NM_029649    | Tmem101       | - |
| 198  | Cdkn2a <sup>-/-</sup> _HSPCs | SINLV.SF.GFP.PRE | SPLEEN      | 11 | 103153757 | + | NM_016896    | Map3k14       | - |
| 175  | Cdkn2a <sup>-/-</sup> _HSPCs | SINLV.SF.GFP.PRE | BM          | 11 | 106922537 | + | NM_176850    | Bptf          | - |
| BULK | Cdkn2a <sup>-/-</sup> _HSPCs | SINLV.SF.GFP.PRE | BULK        | 11 | 108434070 | - | NM_029606    | Ccdc46        | + |
| 237  | Cdkn2a <sup>-/-</sup> _HSPCs | SINLV.SF.GFP.PRE | BM          | 11 | 109387689 | - | NM_028710    | Arsg          | + |
| 175  | Cdkn2a <sup>-/-</sup> _HSPCs | SINLV.SF.GFP.PRE | BM          | 11 | 109599248 | + | NM_153782    | Fam20a        | - |
| 238  | Cdkn2a <sup>-/-</sup> _HSPCs | SINLV.SF.GFP.PRE | SPLEEN      | 11 | 109934575 | + | NM_153145    | Abca8a        | - |
| 174  | Cdkn2a <sup>-/-</sup> _HSPCs | SINLV.SF.GFP.PRE | SPLEEN      | 11 | 110135208 | + | NM_147219    | Abca5         | - |
| 174  | Cdkn2a <sup>-/-</sup> _HSPCs | SINLV.SF.GFP.PRE | SPLEEN      | 11 | 110180432 | + | NM_147219    | Abca5         | - |
| 219  | Cdkn2a <sup>-/-</sup> _HSPCs | SINLV.SF.GFP.PRE | SPLEEN      | 11 | 111597429 | - | NM_008425    | Kcnj2         | + |
| 222  | Cdkn2a <sup>-/-</sup> _HSPCs | SINLV.SF.GFP.PRE | SPLEEN      | 11 | 114793271 | + | NM_199221    | Cd300lb       | - |
| 306  | Cdkn2a <sup>-/-</sup> _HSPCs | SINLV.SF.GFP.PRE | BM          | 11 | 115514640 | - | NM_008163    | Grb2          | - |
| 237  | Cdkn2a <sup>-/-</sup> _HSPCs | SINLV.SF.GFP.PRE | BM          | 11 | 116527092 | - | NM_009180    | St6galnac2    | - |
| 237  | Cdkn2a <sup>-/-</sup> _HSPCs | SINLV.SF.GFP.PRE | BM          | 11 | 120446747 | - | NM_133796    | Arhgdia       | - |
| 237  | Cdkn2a <sup>-/-</sup> _HSPCs | SINLV.SF.GFP.PRE | BM          | 11 | 121325809 | - | NM_029878    | Tbed          | + |
| 219  | Cdkn2a <sup>-/-</sup> _HSPCs | SINLV.SF.GFP.PRE | SPLEEN      | 12 | 3291004   | + | NM_016676    | Rab10         | - |
| BULK | Cdkn2a <sup>-/-</sup> _HSPCs | SINLV.SF.GFP.PRE | BULK        | 12 | 3467197   | - | NM_172421    | Asxl2         | + |
| 174  | Cdkn2a <sup>-/-</sup> _HSPCs | SINLV.SF.GFP.PRE | SPLEEN      | 12 | 7456882   | + | NM_009693    | Apob          | + |
| 227  | Cdkn2a <sup>-/-</sup> _HSPCs | SINLV.SF.GFP.PRE | SPLEEN      | 12 | 7469767   | + | NM_009693    | Apob          | + |
| 198  | Cdkn2a <sup>-/-</sup> _HSPCs | SINLV.SF.GFP.PRE | BM          | 12 | 8694193   | - | NM_030723    | Pum2          | + |
| 198  | Cdkn2a <sup>-/-</sup> _HSPCs | SINLV.SF.GFP.PRE | SPLEEN      | 12 | 10125420  | - | NM_027588    | Nt5c1b        | + |

|     |                              |                  |             |    |          |   |              |          |   |
|-----|------------------------------|------------------|-------------|----|----------|---|--------------|----------|---|
| 219 | Cdkn2a <sup>-/-</sup> _HSPCs | SINLV.SF.GFP.PRE | SPLEEN      | 12 | 12260621 | - | NM_001146119 | Fam49a   | + |
| 207 | Cdkn2a <sup>-/-</sup> _HSPCs | SINLV.SF.GFP.PRE | SPLEEN      | 12 | 13401896 | + | NM_134040    | Ddx1     | - |
| 207 | Cdkn2a <sup>-/-</sup> _HSPCs | SINLV.SF.GFP.PRE | BM          | 12 | 13421078 | + |              | BC072598 | + |
| 206 | Cdkn2a <sup>-/-</sup> _HSPCs | SINLV.SF.GFP.PRE | BM          | 12 | 15575998 | - | NM_144551    | Trib2    | - |
| 206 | Cdkn2a <sup>-/-</sup> _HSPCs | SINLV.SF.GFP.PRE | BM          | 12 | 15594742 | - | NM_144551    | trib2    | - |
| 222 | Cdkn2a <sup>-/-</sup> _HSPCs | SINLV.SF.GFP.PRE | SPLEEN      | 12 | 17385474 | - | NM_001008421 | Nol10    | + |
| 175 | Cdkn2a <sup>-/-</sup> _HSPCs | SINLV.SF.GFP.PRE | BM          | 12 | 21398228 | - | NM_011739    | Ywhaq    | - |
| 217 | Cdkn2a <sup>-/-</sup> _HSPCs | SINLV.SF.GFP.PRE | BM          | 12 | 33076023 | - | NM_001146200 | Pik3cg   | - |
| 209 | Cdkn2a <sup>-/-</sup> _HSPCs | SINLV.SF.GFP.PRE | SPLEEN      | 12 | 34871453 | + | NM_024124    | Hdac9    | - |
| 238 | Cdkn2a <sup>-/-</sup> _HSPCs | SINLV.SF.GFP.PRE | SPLEEN      | 12 | 35781316 | - | NM_001014973 | Snx13    | + |
| 222 | Cdkn2a <sup>-/-</sup> _HSPCs | SINLV.SF.GFP.PRE | SPLEEN      | 12 | 36204426 | - | NM_013464    | Ahr      | - |
| 222 | Cdkn2a <sup>-/-</sup> _HSPCs | SINLV.SF.GFP.PRE | SPLEEN      | 12 | 36862867 | + | NM_025840    | Bzw2     | - |
| 206 | Cdkn2a <sup>-/-</sup> _HSPCs | SINLV.SF.GFP.PRE | BM          | 12 | 39394564 | - | NM_178681    | Dgkb     | + |
| 227 | Cdkn2a <sup>-/-</sup> _HSPCs | SINLV.SF.GFP.PRE | SPLEEN      | 12 | 39873488 | + | NM_007960    | Etv1     | + |
| 237 | Cdkn2a <sup>-/-</sup> _HSPCs | SINLV.SF.GFP.PRE | BM          | 12 | 40946644 | + | NM_013562    | Ifrd1    | - |
| 175 | Cdkn2a <sup>-/-</sup> _HSPCs | SINLV.SF.GFP.PRE | BM          | 12 | 41064725 | + | NM_172575    | Zfp277   | - |
| 198 | Cdkn2a <sup>-/-</sup> _HSPCs | SINLV.SF.GFP.PRE | BM          | 12 | 41278894 | - | NM_172803    | Dock4    | + |
| 217 | Cdkn2a <sup>-/-</sup> _HSPCs | SINLV.SF.GFP.PRE | BM          | 12 | 41320274 | - | NM_172803    | Dock4    | + |
| 175 | Cdkn2a <sup>-/-</sup> _HSPCs | SINLV.SF.GFP.PRE | BM          | 12 | 49953272 | + | NM_001160112 | Foxg1    | + |
| 219 | Cdkn2a <sup>-/-</sup> _HSPCs | SINLV.SF.GFP.PRE | SPLEEN      | 12 | 53009794 | - | NM_177171    | Heatr5a  | - |
| 206 | Cdkn2a <sup>-/-</sup> _HSPCs | SINLV.SF.GFP.PRE | BM          | 12 | 58297357 | + | NM_172577    | Slc25a21 | - |
| 206 | Cdkn2a <sup>-/-</sup> _HSPCs | SINLV.SF.GFP.PRE | BM          | 12 | 58297434 | - | NM_172577    | Slc25a21 | - |
| 198 | Cdkn2a <sup>-/-</sup> _HSPCs | SINLV.SF.GFP.PRE | BM - SPLEEN | 12 | 58343464 | - | NM_001037746 | AU021838 | - |
| 198 | Cdkn2a <sup>-/-</sup> _HSPCs | SINLV.SF.GFP.PRE | SPLEEN      | 12 | 60246806 | - | NM_146034    | Ctage5   | + |
| 238 | Cdkn2a <sup>-/-</sup> _HSPCs | SINLV.SF.GFP.PRE | SPLEEN      | 12 | 66216995 | + | NM_178912    | Fancm    | + |
| 194 | Cdkn2a <sup>-/-</sup> _HSPCs | SINLV.SF.GFP.PRE | BM          | 12 | 67580611 | + | NM_207010    | Mdga2    | - |
| 194 | Cdkn2a <sup>-/-</sup> _HSPCs | SINLV.SF.GFP.PRE | BM          | 12 | 69020540 | - | NM_207010    | Mdga2    | - |
| 198 | Cdkn2a <sup>-/-</sup> _HSPCs | SINLV.SF.GFP.PRE | SPLEEN      | 12 | 69202305 | + | NM_207010    | Mdga2    | - |
| 219 | Cdkn2a <sup>-/-</sup> _HSPCs | SINLV.SF.GFP.PRE | SPLEEN      | 12 | 72082840 | - | NM_011184    | Psm3     | + |
| 301 | Cdkn2a <sup>-/-</sup> _HSPCs | SINLV.SF.GFP.PRE | THYMUS      | 12 | 74113629 | + | NM_008612    | Mnat1    | + |
| 236 | Cdkn2a <sup>-/-</sup> _HSPCs | SINLV.SF.GFP.PRE | BM          | 12 | 75393806 | - | NM_198866    | Dbpht2   | + |

|      |                              |                  |             |    |           |   |              |               |   |
|------|------------------------------|------------------|-------------|----|-----------|---|--------------|---------------|---|
| 198  | Cdkn2a <sup>-/-</sup> _HSPCs | SINLV.SF.GFP.PRE | BM - SPLEEN | 12 | 78515557  | + | NM_016893    | Fut8          | + |
| BULK | Cdkn2a <sup>-/-</sup> _HSPCs | SINLV.SF.GFP.PRE | BULK        | 12 | 91139492  | - | NM_010050    | Dio2          | - |
| 236  | Cdkn2a <sup>-/-</sup> _HSPCs | SINLV.SF.GFP.PRE | BM          | 12 | 91209032  | + | NM_172544    | Nrxn3         | + |
| 222  | Cdkn2a <sup>-/-</sup> _HSPCs | SINLV.SF.GFP.PRE | BM          | 12 | 91243107  | + | NM_172544    | Nrxn3         | + |
| BULK | Cdkn2a <sup>-/-</sup> _HSPCs | SINLV.SF.GFP.PRE | BULK        | 12 | 91762370  | - | NM_181815    | 4930534B04Rik | - |
| 219  | Cdkn2a <sup>-/-</sup> _HSPCs | SINLV.SF.GFP.PRE | SPLEEN      | 12 | 116837746 | + | NM_001004066 | Zfp386        | + |
| 217  | Cdkn2a <sup>-/-</sup> _HSPCs | SINLV.SF.GFP.PRE | BM          | 12 | 118489231 | + | NM_011215    | Ptprn2        | + |
| BULK | Cdkn2a <sup>-/-</sup> _HSPCs | SINLV.SF.GFP.PRE | BULK        | 12 | 119560078 | + | NM_177290    | Itgb8         | - |
| 222  | Cdkn2a <sup>-/-</sup> _HSPCs | SINLV.SF.GFP.PRE | SPLEEN      | 13 | 3600881   | - | NM_134063    | BC016423      | - |
| 222  | Cdkn2a <sup>-/-</sup> _HSPCs | SINLV.SF.GFP.PRE | SPLEEN      | 13 | 3606110   | - | NM_134063    | BC016423      | - |
| 222  | Cdkn2a <sup>-/-</sup> _HSPCs | SINLV.SF.GFP.PRE | SPLEEN      | 13 | 5534127   | + | NM_011803    | Klf6          | + |
| 222  | Cdkn2a <sup>-/-</sup> _HSPCs | SINLV.SF.GFP.PRE | SPLEEN      | 13 | 6321934   | - | NM_145131    | Pitrm1        | + |
| 175  | Cdkn2a <sup>-/-</sup> _HSPCs | SINLV.SF.GFP.PRE | BM          | 13 | 9718746   | - | NM_144516    | Zmynd11       | - |
| 198  | Cdkn2a <sup>-/-</sup> _HSPCs | SINLV.SF.GFP.PRE | BM          | 13 | 9760882   | + | NM_144516    | Zmynd11       | - |
| 227  | Cdkn2a <sup>-/-</sup> _HSPCs | SINLV.SF.GFP.PRE | SPLEEN      | 13 | 13701098  | - | NM_010748    | Lyst          | + |
| 175  | Cdkn2a <sup>-/-</sup> _HSPCs | SINLV.SF.GFP.PRE | BM          | 13 | 13722066  | - | NM_010748    | Lyst          | + |
| 222  | Cdkn2a <sup>-/-</sup> _HSPCs | SINLV.SF.GFP.PRE | BM          | 13 | 13769735  | - | NM_010748    | Lyst          | + |
| 198  | Cdkn2a <sup>-/-</sup> _HSPCs | SINLV.SF.GFP.PRE | BM - SPLEEN | 13 | 13796253  | - | NM_010748    | Lyst          | + |
| 237  | Cdkn2a <sup>-/-</sup> _HSPCs | SINLV.SF.GFP.PRE | BM          | 13 | 16901050  | + | NM_138654    | 5033411D12Rik | - |
| 227  | Cdkn2a <sup>-/-</sup> _HSPCs | SINLV.SF.GFP.PRE | SPLEEN      | 13 | 20836151  | - | NM_012054    | Aoah          | + |
| BULK | Cdkn2a <sup>-/-</sup> _HSPCs | SINLV.SF.GFP.PRE | BULK        | 13 | 21175536  | + | NM_009054    | Trim27        | + |
| 194  | Cdkn2a <sup>-/-</sup> _HSPCs | SINLV.SF.GFP.PRE | BM          | 13 | 23126631  | + | NM_134239    | V1rh14        | - |
| 194  | Cdkn2a <sup>-/-</sup> _HSPCs | SINLV.SF.GFP.PRE | BM          | 13 | 23211035  | + | NM_134239    | V1rh14        | - |
| 175  | Cdkn2a <sup>-/-</sup> _HSPCs | SINLV.SF.GFP.PRE | BM          | 13 | 28836476  | - | NM_009238    | Sox4          | - |
| BULK | Cdkn2a <sup>-/-</sup> _HSPCs | SINLV.SF.GFP.PRE | BULK        | 13 | 29806255  | + | NM_144536    | Cdkal1        | - |
| BULK | Cdkn2a <sup>-/-</sup> _HSPCs | SINLV.SF.GFP.PRE | BULK        | 13 | 30948688  | + | NM_025588    | Exoc2         | - |
| 175  | Cdkn2a <sup>-/-</sup> _HSPCs | SINLV.SF.GFP.PRE | BM          | 13 | 41705509  | + | NM_177808    | Gm5082        | + |
| 237  | Cdkn2a <sup>-/-</sup> _HSPCs | SINLV.SF.GFP.PRE | BM          | 13 | 45758626  | + | NM_009124    | Atxn1         | - |
| 220  | Cdkn2a <sup>-/-</sup> _HSPCs | SINLV.SF.GFP.PRE | BM          | 13 | 60883763  | - | NM_178098    | 4930486L24Rik | - |
| 198  | Cdkn2a <sup>-/-</sup> _HSPCs | SINLV.SF.GFP.PRE | BM          | 13 | 63246179  | - | NM_028079    | 2010111I01Rik | + |
| 198  | Cdkn2a <sup>-/-</sup> _HSPCs | SINLV.SF.GFP.PRE | BM - SPLEEN | 13 | 63338202  | - | NM_028079    | 2010111I01Rik | + |

|      |                              |                  |             |    |           |   |              |               |   |
|------|------------------------------|------------------|-------------|----|-----------|---|--------------|---------------|---|
| 175  | Cdkn2a <sup>-/-</sup> _HSPCs | SINLV.SF.GFP.PRE | BM          | 13 | 63638664  | + | NM_008957    | Ptch1         | - |
| 198  | Cdkn2a <sup>-/-</sup> _HSPCs | SINLV.SF.GFP.PRE | BM - SPLEEN | 13 | 63932764  | - | NM_023507    | 0610007P08Rik | + |
| 215  | Cdkn2a <sup>-/-</sup> _HSPCs | SINLV.SF.GFP.PRE | BM          | 13 | 66998689  | - | NM_026219    | Uqcrb         | - |
| 217  | Cdkn2a <sup>-/-</sup> _HSPCs | SINLV.SF.GFP.PRE | BM          | 13 | 67238557  | - | NM_172392    | Zfp759        | + |
| 198  | Cdkn2a <sup>-/-</sup> _HSPCs | SINLV.SF.GFP.PRE | SPLEEN      | 13 | 74934528  | + | NM_009817    | Cast          | - |
| 219  | Cdkn2a <sup>-/-</sup> _HSPCs | SINLV.SF.GFP.PRE | SPLEEN      | 13 | 75864199  | - | NM_138953    | Ell2          | + |
| 227  | Cdkn2a <sup>-/-</sup> _HSPCs | SINLV.SF.GFP.PRE | SPLEEN      | 13 | 76274124  | - | NM_001081352 | Ttc37         | + |
| 210  | Cdkn2a <sup>-/-</sup> _HSPCs | SINLV.SF.GFP.PRE | BM          | 13 | 76594289  | + | NM_001081352 | AK129128      | + |
| 194  | Cdkn2a <sup>-/-</sup> _HSPCs | SINLV.SF.GFP.PRE | BM          | 13 | 81030134  | + | NM_001042591 | Arrdc3        | + |
| 175  | Cdkn2a <sup>-/-</sup> _HSPCs | SINLV.SF.GFP.PRE | BM          | 13 | 83434987  | + | NM_025282    | Mef2c         | + |
| 237  | Cdkn2a <sup>-/-</sup> _HSPCs | SINLV.SF.GFP.PRE | BM          | 13 | 84369557  | - | NM_175187    | Tmem161b      | + |
| 198  | Cdkn2a <sup>-/-</sup> _HSPCs | SINLV.SF.GFP.PRE | BM - SPLEEN | 13 | 85342576  | + | NM_023243    | Ccnh          | + |
| 175  | Cdkn2a <sup>-/-</sup> _HSPCs | SINLV.SF.GFP.PRE | BM          | 13 | 85360652  | - | NM_145452    | Rasa1         | - |
| 238  | Cdkn2a <sup>-/-</sup> _HSPCs | SINLV.SF.GFP.PRE | SPLEEN      | 13 | 85361102  | - | NM_145452    | Rasa1         | - |
| 175  | Cdkn2a <sup>-/-</sup> _HSPCs | SINLV.SF.GFP.PRE | BM          | 13 | 85368712  | - | NM_145452    | Rasa1         | - |
| 222  | Cdkn2a <sup>-/-</sup> _HSPCs | SINLV.SF.GFP.PRE | SPLEEN      | 13 | 85417639  | + | NM_145452    | Rasa1         | - |
| 198  | Cdkn2a <sup>-/-</sup> _HSPCs | SINLV.SF.GFP.PRE | BM          | 13 | 85676081  | + | NM_023243    | CcnH          | + |
| 194  | Cdkn2a <sup>-/-</sup> _HSPCs | SINLV.SF.GFP.PRE | BM          | 13 | 91679401  | - | NM_024272    | Ssbp2         | + |
| 237  | Cdkn2a <sup>-/-</sup> _HSPCs | SINLV.SF.GFP.PRE | BM          | 13 | 91806401  | + | NM_024186    | Ssbp2         | + |
| 222  | Cdkn2a <sup>-/-</sup> _HSPCs | SINLV.SF.GFP.PRE | BM - SPLEEN | 13 | 93283257  | - | NM_173392    | Zfyve16       | - |
| 222  | Cdkn2a <sup>-/-</sup> _HSPCs | SINLV.SF.GFP.PRE | BM          | 13 | 93614055  | - | NM_173392    | Zfyve16       | - |
| 237  | Cdkn2a <sup>-/-</sup> _HSPCs | SINLV.SF.GFP.PRE | BM          | 13 | 93951458  | - | NM_133905    | Papd4         | - |
| 227  | Cdkn2a <sup>-/-</sup> _HSPCs | SINLV.SF.GFP.PRE | SPLEEN      | 13 | 104673921 | - | NM_001005868 | ErbB2ip       | - |
| 198  | Cdkn2a <sup>-/-</sup> _HSPCs | SINLV.SF.GFP.PRE | SPLEEN      | 13 | 107756564 | - | NM_001145779 | Kif2a         | - |
| 227  | Cdkn2a <sup>-/-</sup> _HSPCs | SINLV.SF.GFP.PRE | SPLEEN      | 13 | 110068002 | - | NM_011056    | Pde4d         | + |
| 207  | Cdkn2a <sup>-/-</sup> _HSPCs | SINLV.SF.GFP.PRE | SPLEEN      | 13 | 111886505 | + | NM_175497    | Actb12        | + |
| 190  | Cdkn2a <sup>-/-</sup> _HSPCs | SINLV.SF.GFP.PRE | SPLEEN      | 13 | 112233646 | - | NM_001122963 | Gbp1          | - |
| 227  | Cdkn2a <sup>-/-</sup> _HSPCs | SINLV.SF.GFP.PRE | SPLEEN      | 13 | 115932840 | + | NM_001033228 | Itga1         | - |
| 174  | Cdkn2a <sup>-/-</sup> _HSPCs | SINLV.SF.GFP.PRE | SPLEEN      | 13 | 117711461 | - | NM_001081009 | Parp8         | - |
| BULK | Cdkn2a <sup>-/-</sup> _HSPCs | SINLV.SF.GFP.PRE | BULK        | 13 | 118008088 | - | NM_001081009 | parp8         | - |
| 217  | Cdkn2a <sup>-/-</sup> _HSPCs | SINLV.SF.GFP.PRE | BM          | 14 | 8724768   | + | NM_134080    | Flnb          | + |

|      |                              |                  |             |    |           |   |              |          |   |
|------|------------------------------|------------------|-------------|----|-----------|---|--------------|----------|---|
| 175  | Cdkn2a <sup>-/-</sup> _HSPCs | SINLV.SF.GFP.PRE | BM          | 14 | 17532040  | - | NM_011243    | Rarb     | - |
| BULK | Cdkn2a <sup>-/-</sup> _HSPCs | SINLV.SF.GFP.PRE | BULK        | 14 | 18209554  | - | NM_001024706 | EG432825 | - |
| BULK | Cdkn2a <sup>-/-</sup> _HSPCs | SINLV.SF.GFP.PRE | BULK        | 14 | 20378017  | + | NM_017479    | Myst4    | + |
| 198  | Cdkn2a <sup>-/-</sup> _HSPCs | SINLV.SF.GFP.PRE | BM - SPLEEN | 14 | 21344487  | + | NM_008914    | Ppp3cb   | - |
| 303  | Cdkn2a <sup>-/-</sup> _HSPCs | SINLV.SF.GFP.PRE | THYMUS      | 14 | 31011583  | + | NM_016897    | Timm23   | - |
| 174  | Cdkn2a <sup>-/-</sup> _HSPCs | SINLV.SF.GFP.PRE | SPLEEN      | 14 | 31320887  | - | NM_133761    | Dep1a    | + |
| 227  | Cdkn2a <sup>-/-</sup> _HSPCs | SINLV.SF.GFP.PRE | SPLEEN      | 14 | 34206362  | - | NM_016700    | Mapk8    | - |
| 175  | Cdkn2a <sup>-/-</sup> _HSPCs | SINLV.SF.GFP.PRE | BM          | 14 | 35044271  | + | NM_181529    | Syt15    | + |
| 210  | Cdkn2a <sup>-/-</sup> _HSPCs | SINLV.SF.GFP.PRE | SPLEEN      | 14 | 39187515  | + | NM_177816    | Sh2d4b   | - |
| 198  | Cdkn2a <sup>-/-</sup> _HSPCs | SINLV.SF.GFP.PRE | BM - SPLEEN | 14 | 45846427  | - | NM_027518    | Gpr137c  | + |
| BULK | Cdkn2a <sup>-/-</sup> _HSPCs | SINLV.SF.GFP.PRE | BULK        | 14 | 49724683  | + | NM_009632    | Parp2    | + |
| 217  | Cdkn2a <sup>-/-</sup> _HSPCs | SINLV.SF.GFP.PRE | BM          | 14 | 55299644  | + | NM_001085473 | Acin1    | - |
| 210  | Cdkn2a <sup>-/-</sup> _HSPCs | SINLV.SF.GFP.PRE | SPLEEN      | 14 | 62659572  | + | NM_173419    | Dleu7    | - |
| 222  | Cdkn2a <sup>-/-</sup> _HSPCs | SINLV.SF.GFP.PRE | BM - SPLEEN | 14 | 65476531  | + | NM_177338    | Hmbox1   | - |
| 175  | Cdkn2a <sup>-/-</sup> _HSPCs | SINLV.SF.GFP.PRE | BM          | 14 | 73643801  | + | NM_009029    | Rb1      | - |
| 219  | Cdkn2a <sup>-/-</sup> _HSPCs | SINLV.SF.GFP.PRE | SPLEEN      | 14 | 76838561  | + | NM_207652    | Tsc22d1  | + |
| 210  | Cdkn2a <sup>-/-</sup> _HSPCs | SINLV.SF.GFP.PRE | SPLEEN      | 14 | 78964506  | + | NM_001081336 | Dgkh     | - |
| 198  | Cdkn2a <sup>-/-</sup> _HSPCs | SINLV.SF.GFP.PRE | SPLEEN      | 14 | 79759996  | - | NM_025832    | Narg1l   | - |
| 222  | Cdkn2a <sup>-/-</sup> _HSPCs | SINLV.SF.GFP.PRE | SPLEEN      | 14 | 84852661  | - | NM_001013753 | Pcdh17   | + |
| BULK | Cdkn2a <sup>-/-</sup> _HSPCs | SINLV.SF.GFP.PRE | BULK        | 14 | 85741880  | + | NM_019670    | Diap3    | - |
| 190  | Cdkn2a <sup>-/-</sup> _HSPCs | SINLV.SF.GFP.PRE | SPLEEN      | 14 | 86456316  | - | NM_019670    | Diap3    | - |
| 215  | Cdkn2a <sup>-/-</sup> _HSPCs | SINLV.SF.GFP.PRE | BM          | 14 | 86833990  | - | NM_172605    | Tdrd3    | + |
| 210  | Cdkn2a <sup>-/-</sup> _HSPCs | SINLV.SF.GFP.PRE | SPLEEN      | 14 | 87833238  | + | NM_172605    | Tdrd3    | + |
| 174  | Cdkn2a <sup>-/-</sup> _HSPCs | SINLV.SF.GFP.PRE | SPLEEN      | 14 | 96989127  | + | NM_053105    | Klhl1    | - |
| 237  | Cdkn2a <sup>-/-</sup> _HSPCs | SINLV.SF.GFP.PRE | BM          | 14 | 100426631 | - | NM_010636    | Klf12    | - |
| 215  | Cdkn2a <sup>-/-</sup> _HSPCs | SINLV.SF.GFP.PRE | BM          | 14 | 101849036 | + | NM_001081278 | Tbc1d4   | - |
| 215  | Cdkn2a <sup>-/-</sup> _HSPCs | SINLV.SF.GFP.PRE | BM          | 14 | 101849145 | - | NM_001081278 | Tbc1d4   | - |
| BULK | Cdkn2a <sup>-/-</sup> _HSPCs | SINLV.SF.GFP.PRE | BULK        | 14 | 103921395 | - | NM_134077    | Rbm26    | - |
| 238  | Cdkn2a <sup>-/-</sup> _HSPCs | SINLV.SF.GFP.PRE | SPLEEN      | 14 | 105693933 | + | NM_029561    | Ndfip2   | + |
| 217  | Cdkn2a <sup>-/-</sup> _HSPCs | SINLV.SF.GFP.PRE | BM          | 14 | 105707428 | - | NM_029561    | Ndfip2   | + |
| 237  | Cdkn2a <sup>-/-</sup> _HSPCs | SINLV.SF.GFP.PRE | BM          | 14 | 114478002 | + | NM_175500    | Gpc5     | + |



|      |                              |                  |             |    |           |   |              |                    |      |
|------|------------------------------|------------------|-------------|----|-----------|---|--------------|--------------------|------|
| 175  | Cdkn2a <sup>-/-</sup> _HSPCs | SINLV.SF.GFP.PRE | BM          | 14 | 115428678 | - | NM_175500    | Gpc5               | +    |
| 217  | Cdkn2a <sup>-/-</sup> _HSPCs | SINLV.SF.GFP.PRE | BM          | 14 | 118024103 | + | NM_001079844 | Gpc6               | +    |
| 207  | Cdkn2a <sup>-/-</sup> _HSPCs | SINLV.SF.GFP.PRE | THYMUS      | 14 | 120048561 | - | NM_023579    | Ranbp5             | +    |
| 237  | Cdkn2a <sup>-/-</sup> _HSPCs | SINLV.SF.GFP.PRE | BM          | 14 | 121322286 | + | NM_023579    | Ipo5               | +    |
| 194  | Cdkn2a <sup>-/-</sup> _HSPCs | SINLV.SF.GFP.PRE | BM          | 14 | 122547713 | + | NM_080556    | Tm9sf2             | +    |
| 194  | Cdkn2a <sup>-/-</sup> _HSPCs | SINLV.SF.GFP.PRE | BM          | 14 | 122547770 | - | NM_080556    | Tm9sf2             | +    |
| BULK | Cdkn2a <sup>-/-</sup> _HSPCs | SINLV.SF.GFP.PRE | BULK        | 14 | 122560518 | + | NM_177393    | Nalcn              | -    |
| 174  | Cdkn2a <sup>-/-</sup> _HSPCs | SINLV.SF.GFP.PRE | SPLEEN      | 15 | 4102360   | + | NM_024188    | Oxct1              | +    |
| 303  | Cdkn2a <sup>-/-</sup> _HSPCs | SINLV.SF.GFP.PRE | BM          | 15 | 4759496   | + | NM_016704    | C6                 | +    |
| 227  | Cdkn2a <sup>-/-</sup> _HSPCs | SINLV.SF.GFP.PRE | SPLEEN      | 15 | 4781987   | - | NM_016704    | C6                 | +    |
| 237  | Cdkn2a <sup>-/-</sup> _HSPCs | SINLV.SF.GFP.PRE | BM          | 15 | 5154376   | + | NM_026213    | Ttc33              | +    |
| 237  | Cdkn2a <sup>-/-</sup> _HSPCs | SINLV.SF.GFP.PRE | BM          | 15 | 5154586   | - | NM_026213    | Ttc33              | +    |
| BULK | Cdkn2a <sup>-/-</sup> _HSPCs | SINLV.SF.GFP.PRE | BULK        | 15 | 6282443   | + | NM_001008702 | Dab2               | +    |
| 175  | Cdkn2a <sup>-/-</sup> _HSPCs | SINLV.SF.GFP.PRE | BM          | 15 | 8260245   | - | NM_201232    | Nipbl              | -    |
| 198  | Cdkn2a <sup>-/-</sup> _HSPCs | SINLV.SF.GFP.PRE | BM - SPLEEN | 15 | 9119515   | + | NM_177178    | Lmbrd2             | +    |
| BULK | Cdkn2a <sup>-/-</sup> _HSPCs | SINLV.SF.GFP.PRE | BULK        | 15 | 9531478   | + |              | ENSMUSG00000063249 | -    |
| 175  | Cdkn2a <sup>-/-</sup> _HSPCs | SINLV.SF.GFP.PRE | BM          | 15 | 9675139   | + | NM_177123    | Spef2              | -    |
| 198  | Cdkn2a <sup>-/-</sup> _HSPCs | SINLV.SF.GFP.PRE | BM - SPLEEN | 15 | 9965195   | - | NM_011169    | Prlr               | +    |
| 198  | Cdkn2a <sup>-/-</sup> _HSPCs | SINLV.SF.GFP.PRE | SPLEEN      | 15 | 15029438  | + | NM_009869    | Cdh9               | +    |
| 186  | Cdkn2a <sup>-/-</sup> _HSPCs | SINLV.SF.GFP.PRE | BM          | 15 | 19696120  | - | NM_009865    | Cdh10              | +    |
| 237  | Cdkn2a <sup>-/-</sup> _HSPCs | SINLV.SF.GFP.PRE | BM          | 15 | 21568327  | + | NM_001008420 | Cdh12              | +    |
| 194  | Cdkn2a <sup>-/-</sup> _HSPCs | SINLV.SF.GFP.PRE | BM          | 15 | 25615554  | + | NM_019472    | Myo10              | +    |
| 194  | Cdkn2a <sup>-/-</sup> _HSPCs | SINLV.SF.GFP.PRE | BM          | 15 | 31448270  | - | NM_172606    | 6-Mar              | #N/D |
| 215  | Cdkn2a <sup>-/-</sup> _HSPCs | SINLV.SF.GFP.PRE | BM          | 15 | 34038151  | - | NM_026002    | Mtdh               | +    |
| 174  | Cdkn2a <sup>-/-</sup> _HSPCs | SINLV.SF.GFP.PRE | SPLEEN      | 15 | 34038155  | - | NM_026002    | Mtdh               | +    |
| 190  | Cdkn2a <sup>-/-</sup> _HSPCs | SINLV.SF.GFP.PRE | SPLEEN      | 15 | 35308447  | + | NM_177151    | Vps13b             | +    |
| 227  | Cdkn2a <sup>-/-</sup> _HSPCs | SINLV.SF.GFP.PRE | SPLEEN      | 15 | 35443789  | + | NM_177151    | Vps13b             | +    |
| BULK | Cdkn2a <sup>-/-</sup> _HSPCs | SINLV.SF.GFP.PRE | BULK        | 15 | 37947473  | - | NM_001081359 | Edd1               | -    |
| 198  | Cdkn2a <sup>-/-</sup> _HSPCs | SINLV.SF.GFP.PRE | SPLEEN      | 15 | 39228438  | - | NM_053271    | Rims2              | +    |
| 238  | Cdkn2a <sup>-/-</sup> _HSPCs | SINLV.SF.GFP.PRE | SPLEEN      | 15 | 41455686  | - | NM_001130166 | Oxr1               | +    |
| 175  | Cdkn2a <sup>-/-</sup> _HSPCs | SINLV.SF.GFP.PRE | BM          | 15 | 41757190  | + | NM_175456    | Abra               | -    |

|      |                              |                  |             |    |          |   |              |               |   |
|------|------------------------------|------------------|-------------|----|----------|---|--------------|---------------|---|
| 222  | Cdkn2a <sup>-/-</sup> _HSPCs | SINLV.SF.GFP.PRE | BM          | 15 | 43106917 | - | NM_008388    | Eif3e         | - |
| 175  | Cdkn2a <sup>-/-</sup> _HSPCs | SINLV.SF.GFP.PRE | BM          | 15 | 44266979 | + | NM_175009    | Eny2          | + |
| 194  | Cdkn2a <sup>-/-</sup> _HSPCs | SINLV.SF.GFP.PRE | BM          | 15 | 44278533 | - | NM_175009    | Eny2          | + |
| 222  | Cdkn2a <sup>-/-</sup> _HSPCs | SINLV.SF.GFP.PRE | BM          | 15 | 45552367 | + | NM_026200    | Kcnv1         | - |
| 222  | Cdkn2a <sup>-/-</sup> _HSPCs | SINLV.SF.GFP.PRE | SPLEEN      | 15 | 45552470 | - | NM_026200    | Kcnv1         | - |
| 237  | Cdkn2a <sup>-/-</sup> _HSPCs | SINLV.SF.GFP.PRE | BM          | 15 | 48263634 | + | NM_001081391 | Csmd3         | - |
| 175  | Cdkn2a <sup>-/-</sup> _HSPCs | SINLV.SF.GFP.PRE | BM          | 15 | 49292004 | - | NM_001081391 | Csmd3         | - |
| 187  | Cdkn2a <sup>-/-</sup> _HSPCs | SINLV.SF.GFP.PRE | BM          | 15 | 50592163 | + | NM_032000    | Trps1         | - |
| 187  | Cdkn2a <sup>-/-</sup> _HSPCs | SINLV.SF.GFP.PRE | BM          | 15 | 50593634 | + | NM_032000    | Trps1         | - |
| 237  | Cdkn2a <sup>-/-</sup> _HSPCs | SINLV.SF.GFP.PRE | BM          | 15 | 53540867 | + | NM_177225    | Samd12        | - |
| 227  | Cdkn2a <sup>-/-</sup> _HSPCs | SINLV.SF.GFP.PRE | SPLEEN      | 15 | 53622181 | - | NM_177225    | Samd12        | - |
| 174  | Cdkn2a <sup>-/-</sup> _HSPCs | SINLV.SF.GFP.PRE | SPLEEN      | 15 | 54053244 | - | NM_008764    | Tnfrsf11b     | - |
| 238  | Cdkn2a <sup>-/-</sup> _HSPCs | SINLV.SF.GFP.PRE | SPLEEN      | 15 | 54917757 | + | NM_183089    | Dscc1         | - |
| BULK | Cdkn2a <sup>-/-</sup> _HSPCs | SINLV.SF.GFP.PRE | BULK        | 15 | 57798207 | - | NM_001081396 | Wdr67         | + |
| 186  | Cdkn2a <sup>-/-</sup> _HSPCs | SINLV.SF.GFP.PRE | BM          | 15 | 57899106 | - | NM_001042438 | Zhx1          | - |
| 237  | Cdkn2a <sup>-/-</sup> _HSPCs | SINLV.SF.GFP.PRE | BM          | 15 | 57980031 | - | NM_029734    | Wdyhv1        | + |
| 237  | Cdkn2a <sup>-/-</sup> _HSPCs | SINLV.SF.GFP.PRE | BM          | 15 | 65938231 | - | NM_152923    | Kenq3         | - |
| 186  | Cdkn2a <sup>-/-</sup> _HSPCs | SINLV.SF.GFP.PRE | BM          | 15 | 66224177 | - | NM_019457    | Lrrc6         | - |
| 174  | Cdkn2a <sup>-/-</sup> _HSPCs | SINLV.SF.GFP.PRE | SPLEEN      | 15 | 82665351 | - | NM_001114140 | Tcf20         | - |
| 206  | Cdkn2a <sup>-/-</sup> _HSPCs | SINLV.SF.GFP.PRE | BM          | 15 | 90480841 | + | NM_001033851 | Cpne8         | - |
| 206  | Cdkn2a <sup>-/-</sup> _HSPCs | SINLV.SF.GFP.PRE | BM          | 15 | 90481033 | - | NM_001033851 | Cpne8         | - |
| 227  | Cdkn2a <sup>-/-</sup> _HSPCs | SINLV.SF.GFP.PRE | SPLEEN      | 15 | 95656229 | - | NM_175344    | Ano6          | + |
| 210  | Cdkn2a <sup>-/-</sup> _HSPCs | SINLV.SF.GFP.PRE | SPLEEN      | 16 | 4342411  | + | NM_009624    | Adcy9         | - |
| 198  | Cdkn2a <sup>-/-</sup> _HSPCs | SINLV.SF.GFP.PRE | BM - SPLEEN | 16 | 11715491 | + | NM_028964    | Snx29         | + |
| 222  | Cdkn2a <sup>-/-</sup> _HSPCs | SINLV.SF.GFP.PRE | BM - SPLEEN | 16 | 15967368 | - | NM_146068    | 2310008H04Rik | - |
| BULK | Cdkn2a <sup>-/-</sup> _HSPCs | SINLV.SF.GFP.PRE | BULK        | 16 | 17300470 | - | NM_001001983 | Pik4ca        | - |
| 217  | Cdkn2a <sup>-/-</sup> _HSPCs | SINLV.SF.GFP.PRE | BM          | 16 | 17412989 | - | NM_023348    | Snap29        | + |
| 198  | Cdkn2a <sup>-/-</sup> _HSPCs | SINLV.SF.GFP.PRE | SPLEEN      | 16 | 23102651 | + | NM_001123037 | Eif4a2        | + |
| 238  | Cdkn2a <sup>-/-</sup> _HSPCs | SINLV.SF.GFP.PRE | BM          | 16 | 37012585 | + | NM_029977    | Polq          | + |
| 238  | Cdkn2a <sup>-/-</sup> _HSPCs | SINLV.SF.GFP.PRE | SPLEEN      | 16 | 37093432 | + | NM_001159369 | Polq          | + |
| 236  | Cdkn2a <sup>-/-</sup> _HSPCs | SINLV.SF.GFP.PRE | BM          | 16 | 38166305 | + | NM_019827    | Gsk3b         | + |

|     |                              |                  |             |    |          |   |              |           |   |
|-----|------------------------------|------------------|-------------|----|----------|---|--------------|-----------|---|
| 236 | Cdkn2a <sup>-/-</sup> _HSPCs | SINLV.SF.GFP.PRE | BM          | 16 | 38166429 | - | NM_019827    | Gsk3b     | + |
| 198 | Cdkn2a <sup>-/-</sup> _HSPCs | SINLV.SF.GFP.PRE | BM - SPLEEN | 16 | 40501732 | - | NM_175548    | Lsamp     | + |
| 237 | Cdkn2a <sup>-/-</sup> _HSPCs | SINLV.SF.GFP.PRE | BM          | 16 | 42418249 | - | NM_008083    | Gap43     | - |
| 210 | Cdkn2a <sup>-/-</sup> _HSPCs | SINLV.SF.GFP.PRE | SPLEEN      | 16 | 42792446 | - | NM_019778    | Zbtb20    | + |
| 175 | Cdkn2a <sup>-/-</sup> _HSPCs | SINLV.SF.GFP.PRE | BM          | 16 | 42919704 | + | NR_002445    | BC002163  | + |
| 227 | Cdkn2a <sup>-/-</sup> _HSPCs | SINLV.SF.GFP.PRE | SPLEEN      | 16 | 43002386 | + | NR_002445    | BC002163  | + |
| 175 | Cdkn2a <sup>-/-</sup> _HSPCs | SINLV.SF.GFP.PRE | BM          | 16 | 43403731 | + | NM_019778    | Zbtb20    | + |
| 190 | Cdkn2a <sup>-/-</sup> _HSPCs | SINLV.SF.GFP.PRE | SPLEEN      | 16 | 45016109 | + | NM_027578    | Cd200r3   | + |
| 219 | Cdkn2a <sup>-/-</sup> _HSPCs | SINLV.SF.GFP.PRE | SPLEEN      | 16 | 50356546 | + | NM_027444    | Bbx       | - |
| 227 | Cdkn2a <sup>-/-</sup> _HSPCs | SINLV.SF.GFP.PRE | SPLEEN      | 16 | 52093763 | - | NM_001033238 | Cblb      | + |
| 238 | Cdkn2a <sup>-/-</sup> _HSPCs | SINLV.SF.GFP.PRE | SPLEEN      | 16 | 52408772 | - | NM_009655    | Alcam     | - |
| 198 | Cdkn2a <sup>-/-</sup> _HSPCs | SINLV.SF.GFP.PRE | BM          | 16 | 56696227 | - | NM_019678    | Tfg       | - |
| 238 | Cdkn2a <sup>-/-</sup> _HSPCs | SINLV.SF.GFP.PRE | SPLEEN      | 16 | 58070038 | - | NM_007739    | Col8a1    | - |
| 237 | Cdkn2a <sup>-/-</sup> _HSPCs | SINLV.SF.GFP.PRE | BM          | 16 | 58571618 | - | NM_001033404 | Gm813     | - |
| 190 | Cdkn2a <sup>-/-</sup> _HSPCs | SINLV.SF.GFP.PRE | SPLEEN      | 16 | 63177575 | - | NM_011173    | Pros1     | + |
| 175 | Cdkn2a <sup>-/-</sup> _HSPCs | SINLV.SF.GFP.PRE | BM          | 16 | 64628608 | - | NM_173861    | Ckt2      | + |
| 227 | Cdkn2a <sup>-/-</sup> _HSPCs | SINLV.SF.GFP.PRE | SPLEEN      | 16 | 64638392 | - | NM_173861    | Ckt2      | + |
| 238 | Cdkn2a <sup>-/-</sup> _HSPCs | SINLV.SF.GFP.PRE | BM          | 16 | 64727705 | + | NM_028059    | Zfp654    | - |
| 238 | Cdkn2a <sup>-/-</sup> _HSPCs | SINLV.SF.GFP.PRE | SPLEEN      | 16 | 64785329 | + | NM_028059    | Zfp654    | - |
| 174 | Cdkn2a <sup>-/-</sup> _HSPCs | SINLV.SF.GFP.PRE | SPLEEN      | 16 | 65569825 | - | NM_026879    | Chmp2b    | - |
| 198 | Cdkn2a <sup>-/-</sup> _HSPCs | SINLV.SF.GFP.PRE | BM          | 16 | 70230655 | - | NM_028803    | Gbe1      | + |
| 198 | Cdkn2a <sup>-/-</sup> _HSPCs | SINLV.SF.GFP.PRE | BM - SPLEEN | 16 | 70348220 | - | NM_028803    | Gbe1      | + |
| 175 | Cdkn2a <sup>-/-</sup> _HSPCs | SINLV.SF.GFP.PRE | BM          | 16 | 75931347 | - | NM_023380    | Samsn1    | - |
| 175 | Cdkn2a <sup>-/-</sup> _HSPCs | SINLV.SF.GFP.PRE | BM          | 16 | 77081755 | - | NM_013918    | Usp25     | + |
| 222 | Cdkn2a <sup>-/-</sup> _HSPCs | SINLV.SF.GFP.PRE | BM - SPLEEN | 16 | 77327341 | + | NM_013918    | Usp25     | + |
| 219 | Cdkn2a <sup>-/-</sup> _HSPCs | SINLV.SF.GFP.PRE | SPLEEN      | 16 | 77550447 | + | NM_013918    | Usp25     | + |
| 210 | Cdkn2a <sup>-/-</sup> _HSPCs | SINLV.SF.GFP.PRE | SPLEEN      | 16 | 80826445 | - | NM_001113208 | Ncam2     | + |
| 198 | Cdkn2a <sup>-/-</sup> _HSPCs | SINLV.SF.GFP.PRE | BM          | 16 | 81591428 | + | NM_010954    | Ncam2     | + |
| 227 | Cdkn2a <sup>-/-</sup> _HSPCs | SINLV.SF.GFP.PRE | SPLEEN      | 16 | 84705235 | + | NM_017404    | Mrpl39    | - |
| 222 | Cdkn2a <sup>-/-</sup> _HSPCs | SINLV.SF.GFP.PRE | BM          | 16 | 85155481 | + | NM_007471    | App       | - |
| 198 | Cdkn2a <sup>-/-</sup> _HSPCs | SINLV.SF.GFP.PRE | SPLEEN      | 16 | 88879103 | - | NM_130857    | Krtap16-5 | - |

|      |                              |                  |             |    |          |   |              |               |   |
|------|------------------------------|------------------|-------------|----|----------|---|--------------|---------------|---|
| BULK | Cdkn2a <sup>-/-</sup> _HSPCs | SINLV.SF.GFP.PRE | BULK        | 16 | 90916149 | - |              | 1810007M14Rik | - |
| 190  | Cdkn2a <sup>-/-</sup> _HSPCs | SINLV.SF.GFP.PRE | SPLEEN      | 16 | 98020489 | - | NM_144789    | Prdm15        | - |
| 219  | Cdkn2a <sup>-/-</sup> _HSPCs | SINLV.SF.GFP.PRE | SPLEEN      | 17 | 4437704  | - | NM_001085355 | Arid1b        | + |
| 187  | Cdkn2a <sup>-/-</sup> _HSPCs | SINLV.SF.GFP.PRE | BM          | 17 | 4724241  | - | NM_001085355 | Arid1b        | + |
| 222  | Cdkn2a <sup>-/-</sup> _HSPCs | SINLV.SF.GFP.PRE | SPLEEN      | 17 | 10413536 | - | NM_001159516 | Qk            | - |
| 190  | Cdkn2a <sup>-/-</sup> _HSPCs | SINLV.SF.GFP.PRE | SPLEEN      | 17 | 12487176 | - | NM_011948    | Map3k4        | - |
| 222  | Cdkn2a <sup>-/-</sup> _HSPCs | SINLV.SF.GFP.PRE | SPLEEN      | 17 | 14027016 | + | NM_010806    | Mllt4         | + |
| 237  | Cdkn2a <sup>-/-</sup> _HSPCs | SINLV.SF.GFP.PRE | BM          | 17 | 17686662 | + | NM_172827    | Lnpep         | - |
| 198  | Cdkn2a <sup>-/-</sup> _HSPCs | SINLV.SF.GFP.PRE | SPLEEN      | 17 | 17707265 | + | NM_172827    | Lnpep         | - |
| 198  | Cdkn2a <sup>-/-</sup> _HSPCs | SINLV.SF.GFP.PRE | SPLEEN      | 17 | 21885323 | + | NM_001008501 | Zfp760        | + |
| 174  | Cdkn2a <sup>-/-</sup> _HSPCs | SINLV.SF.GFP.PRE | SPLEEN      | 17 | 22571438 | - | NM_198003    | 1300003B13Rik | + |
| 175  | Cdkn2a <sup>-/-</sup> _HSPCs | SINLV.SF.GFP.PRE | BM          | 17 | 23949069 | - | NM_175229    | Srrm2         | + |
| BULK | Cdkn2a <sup>-/-</sup> _HSPCs | SINLV.SF.GFP.PRE | BULK        | 17 | 25716668 | - |              | Rab11fip3     | - |
| 237  | Cdkn2a <sup>-/-</sup> _HSPCs | SINLV.SF.GFP.PRE | BM          | 17 | 29425572 | - | NM_030561    | BC004004      | + |
| 237  | Cdkn2a <sup>-/-</sup> _HSPCs | SINLV.SF.GFP.PRE | BM          | 17 | 43197647 | + | NM_178589    | Tnfrsf21      | + |
| 236  | Cdkn2a <sup>-/-</sup> _HSPCs | SINLV.SF.GFP.PRE | BM          | 17 | 50664101 | - | NM_013880    | Plcl2         | + |
| BULK | Cdkn2a <sup>-/-</sup> _HSPCs | SINLV.SF.GFP.PRE | BULK        | 17 | 53094749 | - | NM_020005    | Pcaf          | + |
| 222  | Cdkn2a <sup>-/-</sup> _HSPCs | SINLV.SF.GFP.PRE | SPLEEN      | 17 | 56480098 | + | NM_172132    | Kdm4b         | + |
| 198  | Cdkn2a <sup>-/-</sup> _HSPCs | SINLV.SF.GFP.PRE | SPLEEN      | 17 | 56609056 | + | NM_011218    | Ptprs         | - |
| BULK | Cdkn2a <sup>-/-</sup> _HSPCs | SINLV.SF.GFP.PRE | BULK        | 17 | 58634361 | + | NM_027001    | 2610034M16Rik | - |
| BULK | Cdkn2a <sup>-/-</sup> _HSPCs | SINLV.SF.GFP.PRE | BULK        | 17 | 59711119 | - | NM_026497    | Nudt12        | + |
| 206  | Cdkn2a <sup>-/-</sup> _HSPCs | SINLV.SF.GFP.PRE | BM          | 17 | 62987589 | - | XM_925135.2  | Fbxl17        | - |
| 206  | Cdkn2a <sup>-/-</sup> _HSPCs | SINLV.SF.GFP.PRE | BM          | 17 | 63651476 | - | NM_010109    | Efna5         | - |
| 198  | Cdkn2a <sup>-/-</sup> _HSPCs | SINLV.SF.GFP.PRE | SPLEEN      | 17 | 63822049 | + | NM_001037997 | Fert2         | + |
| 198  | Cdkn2a <sup>-/-</sup> _HSPCs | SINLV.SF.GFP.PRE | SPLEEN      | 17 | 65053240 | + | NM_008549    | Man2a1        | + |
| 198  | Cdkn2a <sup>-/-</sup> _HSPCs | SINLV.SF.GFP.PRE | BM          | 17 | 65690213 | - | NM_001008973 | E130009J12Rik | - |
| 210  | Cdkn2a <sup>-/-</sup> _HSPCs | SINLV.SF.GFP.PRE | SPLEEN      | 17 | 66856190 | + | NM_024448    | Rab12         | - |
| 222  | Cdkn2a <sup>-/-</sup> _HSPCs | SINLV.SF.GFP.PRE | BM          | 17 | 71715204 | - | NM_028887    | Smchd1        | - |
| 227  | Cdkn2a <sup>-/-</sup> _HSPCs | SINLV.SF.GFP.PRE | SPLEEN      | 17 | 74633783 | - | NM_133771    | Memo1         | - |
| 222  | Cdkn2a <sup>-/-</sup> _HSPCs | SINLV.SF.GFP.PRE | SPLEEN      | 17 | 76493969 | + | NM_133747    | Fam98a        | - |
| 222  | Cdkn2a <sup>-/-</sup> _HSPCs | SINLV.SF.GFP.PRE | BM - SPLEEN | 17 | 79369409 | + | NM_029239    | Prkd3         | - |

|      |                              |                  |             |    |          |   |              |               |   |
|------|------------------------------|------------------|-------------|----|----------|---|--------------|---------------|---|
| 207  | Cdkn2a <sup>-/-</sup> _HSPCs | SINLV.SF.GFP.PRE | BM          | 17 | 79791884 | - | NM_019717    | Arl6ip2       | - |
| 207  | Cdkn2a <sup>-/-</sup> _HSPCs | SINLV.SF.GFP.PRE | SPLEEN      | 17 | 80282897 | - | NM_019717    | Atf2          | - |
| 215  | Cdkn2a <sup>-/-</sup> _HSPCs | SINLV.SF.GFP.PRE | BM          | 17 | 83804529 | - | NM_001114361 | Eml4          | + |
| 175  | Cdkn2a <sup>-/-</sup> _HSPCs | SINLV.SF.GFP.PRE | BM          | 17 | 88443757 | - | NM_001081034 | Fbxo11        | - |
| BULK | Cdkn2a <sup>-/-</sup> _HSPCs | SINLV.SF.GFP.PRE | BULK        | 17 | 90279927 | + | NM_020252    | Nrxn1         | - |
| 222  | Cdkn2a <sup>-/-</sup> _HSPCs | SINLV.SF.GFP.PRE | BM - SPLEEN | 17 | 91410453 | - | NM_020252    | Nrxn1         | - |
| 237  | Cdkn2a <sup>-/-</sup> _HSPCs | SINLV.SF.GFP.PRE | BM          | 17 | 92036569 | + | NM_020252    | Nrxn1         | - |
| 207  | Cdkn2a <sup>-/-</sup> _HSPCs | SINLV.SF.GFP.PRE | BM          | 17 | 92710388 | - | NM_001025309 | Pja2          | + |
| 305  | Cdkn2a <sup>-/-</sup> _HSPCs | SINLV.SF.GFP.PRE | BM          | 18 | 6229335  | - | NM_008448    | Kif5b         | - |
| 227  | Cdkn2a <sup>-/-</sup> _HSPCs | SINLV.SF.GFP.PRE | SPLEEN      | 18 | 6235516  | - | NM_008448    | Kif5b         | - |
| 217  | Cdkn2a <sup>-/-</sup> _HSPCs | SINLV.SF.GFP.PRE | BM          | 18 | 6236452  | - | NM_008448    | Kif5b         | - |
| 238  | Cdkn2a <sup>-/-</sup> _HSPCs | SINLV.SF.GFP.PRE | SPLEEN      | 18 | 10641365 | + | NM_134130    | Abhd3         | - |
| 222  | Cdkn2a <sup>-/-</sup> _HSPCs | SINLV.SF.GFP.PRE | SPLEEN      | 18 | 15006079 | - | NM_001100449 | Taf4b         | + |
| 190  | Cdkn2a <sup>-/-</sup> _HSPCs | SINLV.SF.GFP.PRE | SPLEEN      | 18 | 17524251 | + | NM_007664    | Cdh2          | - |
| 175  | Cdkn2a <sup>-/-</sup> _HSPCs | SINLV.SF.GFP.PRE | BM          | 18 | 20733685 | - | NM_007883    | Dsg2          | + |
| 207  | Cdkn2a <sup>-/-</sup> _HSPCs | SINLV.SF.GFP.PRE | SPLEEN      | 18 | 23231521 | - | NM_199024    | Nol4          | - |
| 175  | Cdkn2a <sup>-/-</sup> _HSPCs | SINLV.SF.GFP.PRE | BM          | 18 | 24017687 | + | NM_153058    | Mapre2        | + |
| 198  | Cdkn2a <sup>-/-</sup> _HSPCs | SINLV.SF.GFP.PRE | BM          | 18 | 25296215 | + | NM_001004361 | 5730494M16Rik | - |
| 222  | Cdkn2a <sup>-/-</sup> _HSPCs | SINLV.SF.GFP.PRE | SPLEEN      | 18 | 25307726 | - | NM_001004361 | 5730494M16Rik | - |
| 237  | Cdkn2a <sup>-/-</sup> _HSPCs | SINLV.SF.GFP.PRE | BM          | 18 | 25513863 | - | NM_001033532 | AW554918      | + |
| 175  | Cdkn2a <sup>-/-</sup> _HSPCs | SINLV.SF.GFP.PRE | BM          | 18 | 26650980 | + | NM_001146292 | Brunol4       | + |
| 219  | Cdkn2a <sup>-/-</sup> _HSPCs | SINLV.SF.GFP.PRE | SPLEEN      | 18 | 35100026 | - | NM_010481    | Hspa9         | - |
| 175  | Cdkn2a <sup>-/-</sup> _HSPCs | SINLV.SF.GFP.PRE | BM          | 18 | 38597563 | - | NM_022996    | Ndfip1        | + |
| 210  | Cdkn2a <sup>-/-</sup> _HSPCs | SINLV.SF.GFP.PRE | SPLEEN      | 18 | 39630557 | + | NM_008173    | Nr3c1         | - |
| 198  | Cdkn2a <sup>-/-</sup> _HSPCs | SINLV.SF.GFP.PRE | SPLEEN      | 18 | 40376734 | + | NM_023311    | Yipf5         | - |
| BULK | Cdkn2a <sup>-/-</sup> _HSPCs | SINLV.SF.GFP.PRE | BULK        | 18 | 46672752 | - | NM_173394    | Ticam2        | - |
| 237  | Cdkn2a <sup>-/-</sup> _HSPCs | SINLV.SF.GFP.PRE | BM          | 18 | 50341126 | - | NM_008292    | Hsd17b4       | + |
| 175  | Cdkn2a <sup>-/-</sup> _HSPCs | SINLV.SF.GFP.PRE | BM          | 18 | 52268658 | - | NM_026286    | Ftmt          | + |
| 198  | Cdkn2a <sup>-/-</sup> _HSPCs | SINLV.SF.GFP.PRE | BM - SPLEEN | 18 | 54091096 | + | NM_152809    | Csnk1g3       | + |
| 238  | Cdkn2a <sup>-/-</sup> _HSPCs | SINLV.SF.GFP.PRE | SPLEEN      | 18 | 54339176 | - | NM_152809    | Csnk1g3       | + |
| 207  | Cdkn2a <sup>-/-</sup> _HSPCs | SINLV.SF.GFP.PRE | SPLEEN      | 18 | 55095248 | - | NM_175751    | Zfp608        | - |

|      |                              |                  |             |    |          |   |              |               |      |
|------|------------------------------|------------------|-------------|----|----------|---|--------------|---------------|------|
| 198  | Cdkn2a <sup>-/-</sup> _HSPCs | SINLV.SF.GFP.PRE | BM          | 18 | 57048963 | + | NM_177115    | 3-Mar         | #N/D |
| 222  | Cdkn2a <sup>-/-</sup> _HSPCs | SINLV.SF.GFP.PRE | BM - SPLEEN | 18 | 61332322 | + | NM_178277    | Hmgxb3        | -    |
| 219  | Cdkn2a <sup>-/-</sup> _HSPCs | SINLV.SF.GFP.PRE | SPLEEN      | 18 | 63823678 | + | NM_016792    | Txn1l         | -    |
| 238  | Cdkn2a <sup>-/-</sup> _HSPCs | SINLV.SF.GFP.PRE | SPLEEN      | 18 | 67364066 | + | NM_010307    | Gnal          | +    |
| 174  | Cdkn2a <sup>-/-</sup> _HSPCs | SINLV.SF.GFP.PRE | BM          | 18 | 67807634 | + | NM_008977    | Ptpn2         | -    |
| 174  | Cdkn2a <sup>-/-</sup> _HSPCs | SINLV.SF.GFP.PRE | SPLEEN      | 18 | 67841919 | + | NM_001127177 | Ptpn2         | -    |
| BULK | Cdkn2a <sup>-/-</sup> _HSPCs | SINLV.SF.GFP.PRE | BULK        | 18 | 67979968 | - |              | Cep192        | +    |
| 222  | Cdkn2a <sup>-/-</sup> _HSPCs | SINLV.SF.GFP.PRE | SPLEEN      | 18 | 69813907 | + | NM_001083967 | Tcf4          | +    |
| 175  | Cdkn2a <sup>-/-</sup> _HSPCs | SINLV.SF.GFP.PRE | BM          | 18 | 70201970 | - | NM_030554    | Rab27b        | -    |
| BULK | Cdkn2a <sup>-/-</sup> _HSPCs | SINLV.SF.GFP.PRE | BULK        | 18 | 75782820 | + | NM_201354    | Gm672         | -    |
| 237  | Cdkn2a <sup>-/-</sup> _HSPCs | SINLV.SF.GFP.PRE | BM          | 18 | 77323231 | - | NM_008602    | Pias2         | +    |
| 227  | Cdkn2a <sup>-/-</sup> _HSPCs | SINLV.SF.GFP.PRE | SPLEEN      | 18 | 78000214 | + | NM_146089    | Haus1         | -    |
| 187  | Cdkn2a <sup>-/-</sup> _HSPCs | SINLV.SF.GFP.PRE | BM          | 18 | 81047115 | + | NM_015805    | Atp9b         | -    |
| 237  | Cdkn2a <sup>-/-</sup> _HSPCs | SINLV.SF.GFP.PRE | BM          | 18 | 89048433 | + | NM_018821    | Socs6         | -    |
| BULK | Cdkn2a <sup>-/-</sup> _HSPCs | SINLV.SF.GFP.PRE | BULK        | 18 | 89146210 | + | NM_175542    | Rtnn          | +    |
| 190  | Cdkn2a <sup>-/-</sup> _HSPCs | SINLV.SF.GFP.PRE | SPLEEN      | 19 | 6371657  | - | NM_001110791 | Sf1           | +    |
| 206  | Cdkn2a <sup>-/-</sup> _HSPCs | SINLV.SF.GFP.PRE | BM          | 19 | 10595581 | + | NM_172302    | 5730453I16Rik | +    |
| 206  | Cdkn2a <sup>-/-</sup> _HSPCs | SINLV.SF.GFP.PRE | BM          | 19 | 10603026 | + | NM_172302    | Cpsf7         | +    |
| 174  | Cdkn2a <sup>-/-</sup> _HSPCs | SINLV.SF.GFP.PRE | SPLEEN      | 19 | 14535308 | - | NM_011600    | Tle4          | -    |
| 217  | Cdkn2a <sup>-/-</sup> _HSPCs | SINLV.SF.GFP.PRE | BM          | 19 | 14546548 | - | NM_011600    | Tle4          | -    |
| 198  | Cdkn2a <sup>-/-</sup> _HSPCs | SINLV.SF.GFP.PRE | SPLEEN      | 19 | 14626355 | + | NM_011600    | Tle4          | -    |
| 222  | Cdkn2a <sup>-/-</sup> _HSPCs | SINLV.SF.GFP.PRE | SPLEEN      | 19 | 14662454 | + | NM_011600    | Tle4          | -    |
| 222  | Cdkn2a <sup>-/-</sup> _HSPCs | SINLV.SF.GFP.PRE | SPLEEN      | 19 | 21352926 | + | NM_009551    | Zfand5        | +    |
| 238  | Cdkn2a <sup>-/-</sup> _HSPCs | SINLV.SF.GFP.PRE | SPLEEN      | 19 | 21935874 | + | NM_001033759 | Tmem2         | +    |
| 219  | Cdkn2a <sup>-/-</sup> _HSPCs | SINLV.SF.GFP.PRE | SPLEEN      | 19 | 25040344 | - | NM_146097    | Cbwd1         | -    |
| 238  | Cdkn2a <sup>-/-</sup> _HSPCs | SINLV.SF.GFP.PRE | SPLEEN      | 19 | 29180851 | + | NM_021525    | Rcl1          | +    |
| 207  | Cdkn2a <sup>-/-</sup> _HSPCs | SINLV.SF.GFP.PRE | SPLEEN      | 19 | 29374017 | + | NM_001048177 | Jak2          | +    |
| 210  | Cdkn2a <sup>-/-</sup> _HSPCs | SINLV.SF.GFP.PRE | SPLEEN      | 19 | 30401528 | - | NM_010776    | Mbl2          | +    |
| 190  | Cdkn2a <sup>-/-</sup> _HSPCs | SINLV.SF.GFP.PRE | SPLEEN      | 19 | 32361935 | + | NM_144792    | Sgms1         | -    |
| 198  | Cdkn2a <sup>-/-</sup> _HSPCs | SINLV.SF.GFP.PRE | SPLEEN      | 19 | 32947579 | - | NM_008960    | Pten          | +    |
| 238  | Cdkn2a <sup>-/-</sup> _HSPCs | SINLV.SF.GFP.PRE | SPLEEN      | 19 | 36525716 | - | NM_029508    | Pcgf5         | +    |

|      |                              |                  |             |    |          |   |              |               |   |
|------|------------------------------|------------------|-------------|----|----------|---|--------------|---------------|---|
| BULK | Cdkn2a <sup>-/-</sup> _HSPCs | SINLV.SF.GFP.PRE | BULK        | 19 | 37035381 | - | NM_001080706 | Btaf1         | + |
| 237  | Cdkn2a <sup>-/-</sup> _HSPCs | SINLV.SF.GFP.PRE | BM          | 19 | 37425671 | + | NM_031156    | Ide           | - |
| 190  | Cdkn2a <sup>-/-</sup> _HSPCs | SINLV.SF.GFP.PRE | SPLEEN      | 19 | 38913055 | - | NM_145952    | Tbc1d12       | + |
| 222  | Cdkn2a <sup>-/-</sup> _HSPCs | SINLV.SF.GFP.PRE | BM - SPLEEN | 19 | 41425733 | + | NM_031376    | Pik3ap1       | - |
| 222  | Cdkn2a <sup>-/-</sup> _HSPCs | SINLV.SF.GFP.PRE | BM - SPLEEN | 19 | 43119849 | + | NM_001081257 | LOC545291     | - |
| 227  | Cdkn2a <sup>-/-</sup> _HSPCs | SINLV.SF.GFP.PRE | SPLEEN      | 19 | 43676702 | - | NM_008699    | Nkx2-3        | + |
| 236  | Cdkn2a <sup>-/-</sup> _HSPCs | SINLV.SF.GFP.PRE | BM          | 19 | 50843337 | + | NM_021377    | Sorcs1        | - |
| 222  | Cdkn2a <sup>-/-</sup> _HSPCs | SINLV.SF.GFP.PRE | SPLEEN      | 19 | 54063010 | - | NM_019658    | Shoc2         | + |
| 198  | Cdkn2a <sup>-/-</sup> _HSPCs | SINLV.SF.GFP.PRE | SPLEEN      | 19 | 54065647 | + | NM_019658    | Shoc2         | + |
| 174  | Cdkn2a <sup>-/-</sup> _HSPCs | SINLV.SF.GFP.PRE | SPLEEN      | 19 | 55486161 | + | NM_016862    | Vti1a         | + |
| BULK | Cdkn2a <sup>-/-</sup> _HSPCs | SINLV.SF.GFP.PRE | BULK        | X  | 21495    | - | NM_011515    | Sybl1         | - |
| 207  | Cdkn2a <sup>-/-</sup> _HSPCs | SINLV.SF.GFP.PRE | SPLEEN      | X  | 6035490  | + | NM_001040459 | Shroom4       | + |
| 215  | Cdkn2a <sup>-/-</sup> _HSPCs | SINLV.SF.GFP.PRE | BM          | X  | 6236192  | - | NM_001040459 | Shroom4       | + |
| 207  | Cdkn2a <sup>-/-</sup> _HSPCs | SINLV.SF.GFP.PRE | SPLEEN      | X  | 7670997  | - | NR_003632    | EG627782      | - |
| 210  | Cdkn2a <sup>-/-</sup> _HSPCs | SINLV.SF.GFP.PRE | SPLEEN      | X  | 8841046  | - | NM_173414    | Lanc13        | + |
| 206  | Cdkn2a <sup>-/-</sup> _HSPCs | SINLV.SF.GFP.PRE | BM          | X  | 9700632  | - | NM_019634    | Tspan7        | + |
| 206  | Cdkn2a <sup>-/-</sup> _HSPCs | SINLV.SF.GFP.PRE | BM          | X  | 10120716 | + | NM_019634    | Tspan7        | + |
| 206  | Cdkn2a <sup>-/-</sup> _HSPCs | SINLV.SF.GFP.PRE | BM          | X  | 10120798 | - | NM_019634    | Tspan7        | + |
| 190  | Cdkn2a <sup>-/-</sup> _HSPCs | SINLV.SF.GFP.PRE | SPLEEN      | X  | 17764142 | + | NM_009483    | Kdm6a         | + |
| 175  | Cdkn2a <sup>-/-</sup> _HSPCs | SINLV.SF.GFP.PRE | BM          | X  | 17797121 | + | NM_009483    | Kdm6a         | + |
| 227  | Cdkn2a <sup>-/-</sup> _HSPCs | SINLV.SF.GFP.PRE | SPLEEN      | X  | 19977336 | + | NM_133669    | Rp2h          | + |
| 175  | Cdkn2a <sup>-/-</sup> _HSPCs | SINLV.SF.GFP.PRE | BM          | X  | 21135934 | - | NM_007429    | Agtr2         | + |
| 209  | Cdkn2a <sup>-/-</sup> _HSPCs | SINLV.SF.GFP.PRE | SPLEEN      | X  | 23265589 | - | NM_175180    | Wdr44         | + |
| 175  | Cdkn2a <sup>-/-</sup> _HSPCs | SINLV.SF.GFP.PRE | BM          | X  | 36133722 | + | NM_183126    | 6030498E09Rik | + |
| BULK | Cdkn2a <sup>-/-</sup> _HSPCs | SINLV.SF.GFP.PRE | BULK        | X  | 38117738 | + | NM_001033422 | Thoc2         | - |
| 222  | Cdkn2a <sup>-/-</sup> _HSPCs | SINLV.SF.GFP.PRE | SPLEEN      | X  | 39525556 | + | NM_021465    | Stag2         | + |
| 198  | Cdkn2a <sup>-/-</sup> _HSPCs | SINLV.SF.GFP.PRE | SPLEEN      | X  | 39625364 | - | NM_001077712 | Stag2         | + |
| 198  | Cdkn2a <sup>-/-</sup> _HSPCs | SINLV.SF.GFP.PRE | SPLEEN      | X  | 40791849 | + | NM_011855    | Odz1          | - |
| 222  | Cdkn2a <sup>-/-</sup> _HSPCs | SINLV.SF.GFP.PRE | SPLEEN      | X  | 42964016 | + | NM_028514    | Actr1         | + |
| 198  | Cdkn2a <sup>-/-</sup> _HSPCs | SINLV.SF.GFP.PRE | BM - SPLEEN | X  | 58389279 | + | NM_009237    | Sox3          | - |
| 301  | Cdkn2a <sup>-/-</sup> _HSPCs | SINLV.SF.GFP.PRE | BM          | X  | 67492014 | + | NM_019926    | Mtm1          | + |

|     |                              |                  |             |   |           |   |              |               |   |
|-----|------------------------------|------------------|-------------|---|-----------|---|--------------|---------------|---|
| 190 | Cdkn2a <sup>-/-</sup> _HSPCs | SINLV.SF.GFP.PRE | BM          | X | 71690124  | - | NM_145956    | Brcc3         | + |
| 210 | Cdkn2a <sup>-/-</sup> _HSPCs | SINLV.SF.GFP.PRE | BM          | X | 71898162  | - | NM_175122    | Rab39b        | - |
| 190 | Cdkn2a <sup>-/-</sup> _HSPCs | SINLV.SF.GFP.PRE | SPLEEN      | X | 72682743  | - | NM_145956    | Brcc3         | + |
| 198 | Cdkn2a <sup>-/-</sup> _HSPCs | SINLV.SF.GFP.PRE | BM - SPLEEN | X | 76675988  | + | NM_001099307 | Gm7173        | - |
| 174 | Cdkn2a <sup>-/-</sup> _HSPCs | SINLV.SF.GFP.PRE | SPLEEN      | X | 78308736  | - | NM_138751    | Tmem47        | + |
| 198 | Cdkn2a <sup>-/-</sup> _HSPCs | SINLV.SF.GFP.PRE | BM - SPLEEN | X | 78325469  | + | NM_175771    | Tmem47        | + |
| 198 | Cdkn2a <sup>-/-</sup> _HSPCs | SINLV.SF.GFP.PRE | BM          | X | 78325510  | - | NM_175771    | Tmem47        | + |
| 198 | Cdkn2a <sup>-/-</sup> _HSPCs | SINLV.SF.GFP.PRE | BM          | X | 78325547  | - | NM_175771    | Tmem47        | + |
| 198 | Cdkn2a <sup>-/-</sup> _HSPCs | SINLV.SF.GFP.PRE | BM          | X | 78325564  | - | NM_175771    | Tmem47        | + |
| 222 | Cdkn2a <sup>-/-</sup> _HSPCs | SINLV.SF.GFP.PRE | SPLEEN      | X | 84192915  | - | NM_001160403 | Il1rap1l      | - |
| 222 | Cdkn2a <sup>-/-</sup> _HSPCs | SINLV.SF.GFP.PRE | SPLEEN      | X | 93342562  | + | NM_010833    | Msn           | + |
| 207 | Cdkn2a <sup>-/-</sup> _HSPCs | SINLV.SF.GFP.PRE | SPLEEN      | X | 103196053 | + | NM_025952    | Magt1         | - |
| 209 | Cdkn2a <sup>-/-</sup> _HSPCs | SINLV.SF.GFP.PRE | SPLEEN      | X | 104012778 | + | NM_025921    | 2610002M06Rik | - |
| 194 | Cdkn2a <sup>-/-</sup> _HSPCs | SINLV.SF.GFP.PRE | BM          | X | 106299645 | + | NM_019989    | Sh3bgr1       | + |
| 222 | Cdkn2a <sup>-/-</sup> _HSPCs | SINLV.SF.GFP.PRE | SPLEEN      | X | 106862248 | + | NM_001037917 | Gm6377        | + |
| 238 | Cdkn2a <sup>-/-</sup> _HSPCs | SINLV.SF.GFP.PRE | SPLEEN      | X | 109631144 | + | NM_026333    | 2010106E10Rik | + |
| 222 | Cdkn2a <sup>-/-</sup> _HSPCs | SINLV.SF.GFP.PRE | BM - SPLEEN | X | 110217022 | + | NM_018818    | Chm           | - |
| 237 | Cdkn2a <sup>-/-</sup> _HSPCs | SINLV.SF.GFP.PRE | BM          | X | 111593081 | + | NM_172781    | Klhl4         | + |
| 174 | Cdkn2a <sup>-/-</sup> _HSPCs | SINLV.SF.GFP.PRE | SPLEEN      | X | 111761902 | - | NM_172781    | Klhl4         | + |
| 237 | Cdkn2a <sup>-/-</sup> _HSPCs | SINLV.SF.GFP.PRE | BM          | X | 126903267 | - | NM_172493    | Diap2         | + |
| 238 | Cdkn2a <sup>-/-</sup> _HSPCs | SINLV.SF.GFP.PRE | SPLEEN      | X | 136236266 | + | NM_001081499 | Tbc1d8b       | + |
| 198 | Cdkn2a <sup>-/-</sup> _HSPCs | SINLV.SF.GFP.PRE | SPLEEN      | X | 138811940 | + | NM_001033600 | Acsl4         | - |
| 198 | Cdkn2a <sup>-/-</sup> _HSPCs | SINLV.SF.GFP.PRE | BM          | X | 149035417 | - | NM_172441    | Shroom2       | - |
| 198 | Cdkn2a <sup>-/-</sup> _HSPCs | SINLV.SF.GFP.PRE | SPLEEN      | X | 149676318 | - | NM_173780    | Klf8          | + |
| 238 | Cdkn2a <sup>-/-</sup> _HSPCs | SINLV.SF.GFP.PRE | SPLEEN      | X | 155782478 | + | NM_148945    | Rps6ka3       | + |
| 174 | Cdkn2a <sup>-/-</sup> _HSPCs | SINLV.SF.GFP.PRE | BM          | X | 161831793 | + | NM_019773    | rab9          | - |
| 174 | Cdkn2a <sup>-/-</sup> _HSPCs | SINLV.SF.GFP.PRE | SPLEEN      | X | 162925619 | + | NM_019773    | Rab9          | - |
| 175 | Cdkn2a <sup>-/-</sup> _HSPCs | SINLV.SF.GFP.PRE | BM          | X | 163787919 | + | NM_026662    | Prps2         | - |
| 194 | Cdkn2a <sup>-/-</sup> _HSPCs | SINLV.SF.GFP.PRE | BM          | X | 165442003 | - | NM_009707    | Arhgap6       | + |
| 175 | Cdkn2a <sup>-/-</sup> _HSPCs | SINLV.SF.GFP.PRE | BM          | X | 166198582 | - | NM_010797    | Mid1          | + |

Mouse ID: mouse identifier number.



Genotype: Genotype of the mouse in which the selected vector integration site was retrieved.

Vector: type of vector used.

Tissue: indicate if the vector integration was found in liver and/or in the spleen of the injected mouse.

Chr: chromosome in which the vector integration was found

Integration Locus: LTR position on chromosome in nucleotides

Sequence Ori: orientation of the vector sequence with respect to chromosome: +, chr and vector are in the same orientation; -, vector sequence is in opposite orientation with respect to the chromosome

Ref Seq Name: Mouse RefSeq of genes targeted or near vector integrations is indicated.

Ref Seq Symbol: Gene symbol targeted or nearest the integration site.

Gene Ori: orientation of the gene sequence with respect to chromosome
