# Supplementary material
Source: PubMed Central journal article supplement (PMC3982501)
Supplement: mt20143x12.pdf [file mt20143x12.pdf]

**Supplementary Table 7: Gene Ontology analyses of Common Insertion Sites retrieved from *Cdkn2a*<sup>-/-</sup> mice injected with the different SIN LVs**

| <b>System (a)</b>  | <b>Gene Class (b)</b>                         | <b>Count (c)</b> | <b>P_Value (d)</b> |
|--------------------|-----------------------------------------------|------------------|--------------------|
| Biological Process | Regulation of protein kinase cascade          | 4                | 1.50E-02           |
| Biological Process | Positive regulation of protein kinase cascade | 3                | 3.40E-02           |
| Molecular Function | GTPase regulator activity                     | 5                | 3.10E-02           |
| Molecular Function | Nucleoside-triphosphatase regulator activity  | 5                | 3.30E-02           |
| KEGG PATHWAY       | MAPK signaling pathway                        | 5                | 1.00E-02           |
| BIOCARTA           | MAPKinase Signaling Pathway                   | 3                | 4.00E-02           |

- a) System: classification system.
- b) Gene classes: gene categories contained in the BP and MF systems. Gene classes were retrieved if identified by at least 3 genes.
- c) Count: number of genes that are contained in that gene class
- d) P\_Value: Significance of the overrepresentation of that class
